# Supplementary material for: The role of reciprocal fusions in MLL-r acute leukemia: studying the chromosomal translocation t(6;11)
Source: Oncogene. 2021 Aug 5;40(40):5902–12. doi: 10.1038/s41388-021-01983-3 (PMC8497272; doi:10.1038/s41388-021-01983-3)
Supplement: Supplementary file 2 — MACE-Seq MLL-AF6 [file 41388_2021_1983_MOESM2_ESM.xlsx]

## Sheet: Sheet1
ID	gene symbol	gene name	mean exp	mean mock	log2	pvalue	minus log 10	var-log2	chrom	begin	end	PG	NA	LINC	MIR	SNO	MT	PCG
ENSG00000128250	RFPL1	ret finger protein like 1	13.5018	0.171101	3.0467	3.45966e-12	11.461	6.30216	22	29442123	29442455							1
ENSG00000167941	SOST	sclerostin	10.2402	0.171101	2.6335	8.8156e-10	9.05475	5.90326	17	43753731	43755341							1
ENSG00000196589	MBD3L2B	methyl-CpG binding domain protein 3 like 2B	51.8659	0.971639	4.11432	4.15181e-32	31.3818	5.73822	19	7018971	7019076							1
ENSG00000233891	AC007179.2	NA	10.1767	0.227401	2.61581	1.83519e-09	8.73632	5.48389	2	59669216	59669548		1					0
ENSG00000237247	MBD3L5	methyl-CpG binding domain protein 3 like 5	10.9559	0.287235	2.66042	4.34585e-10	9.36193	5.25333	19	7032895	7033011							1
ENSG00000184502	GAST	gastrin	22.3611	0.684404	3.26018	1.82403e-16	15.739	5.03	17	41715873	41715969							1
ENSG00000144015	TRIM43	tripartite motif containing 43	16.4004	0.514637	3.01806	4.45139e-14	13.3515	4.99403	2	95599574	95599778							1
ENSG00000223638	RFPL4A	ret finger protein like 4A	14.0698	0.513303	2.6366	3.18904e-12	11.4963	4.77665	19	55761792	55761800							1
ENSG00000115009	CCL20	C-C motif chemokine ligand 20	18.4342	0.685738	2.98147	4.98576e-15	14.3023	4.74859	2	227817062	227817463							1
ENSG00000173262	SLC2A14	solute carrier family 2 member 14	18.3866	0.685738	3.05073	8.39765e-14	13.0758	4.74485	12	7870850	7871062							1
ENSG00000237742	AL365259.1	NA	12.2582	0.458336	2.76786	2.80353e-10	9.5523	4.74119	6	125720343	125720507		1					0
ENSG00000122304	PRM2	protamine 2	12.0836	0.458336	2.67575	2.90229e-10	9.53726	4.7205	16	11275640	11275829							1
ENSG00000176840	MIR7-3HG	MIR7-3 host gene	446.776	17.1185	3.89548	6.30928e-28	27.2	4.70592	19	4772132	4772514				1			0
ENSG00000106366	SERPINE1	serpin family E member 1	82.0599	3.14499	4.14485	3.01219e-43	42.5211	4.70555	7	101137443	101139266							1
ENSG00000230522	MBD3L2	methyl-CpG binding domain protein 3 like 2	30.8988	1.20391	3.42897	4.28145e-20	19.3684	4.68176	19	7051623	7051735							1
ENSG00000241912	AC078788.2	NA	40.9961	1.66358	3.82123	3.54701e-26	25.4501	4.62313	3	153377246	153377562		1					0
ENSG00000255363	AP001189.5	NA	205.336	8.35826	4.48246	1.57274e-85	84.8033	4.61864	11	76628096	76628481		1					0
ENSG00000247372	AC008897.2	NA	53.5482	2.34445	3.8666	2.05413e-29	28.6874	4.51352	5	75320155	75320483		1					0
ENSG00000012504	NR1H4	nuclear receptor subfamily 1 group H member 4	17.9822	0.801872	3.05868	6.7784e-14	13.1689	4.48705	12	100505634	100505824							1
ENSG00000236078	LINC01447	long intergenic non-protein coding RNA 1447	201.418	9.04132	4.31646	4.24783e-82	81.3718	4.47752	7	47628697	47629893			1				0
ENSG00000214915	BX546450.1	NA	81.0413	3.66449	3.99858	4.44516e-44	43.3521	4.46697	0	151515894	151516245		1					0
ENSG00000235643	LINC01647	long intergenic non-protein coding RNA 1647	28.6483	1.31517	3.3483	3.20457e-19	18.4942	4.44512	1	11612790	11613355			1				0
ENSG00000172969	FRG2C	FSHD region gene 2 family member C	26.4412	1.25534	3.13068	1.34272e-18	17.872	4.39663	3	75666042	75667220							1
ENSG00000197588	KLKP1	kallikrein pseudogene 1	57.9646	2.91272	3.73004	3.87783e-29	28.4114	4.31473	19	50887866	50888268	1						0
ENSG00000163286	ALPG	alkaline phosphatase, germ cell	175.404	8.93626	3.62323	6.39315e-26	25.1943	4.29486	2	232409873	232410714							1
ENSG00000157765	SLC34A2	solute carrier family 34 member 2	27.7614	1.42778	3.25713	8.73532e-18	17.0587	4.28124	4	25669647	25669693							1
ENSG00000178928	TPRX1	tetrapeptide repeat homeobox 1	54.6954	2.85909	3.65842	4.86741e-30	29.3127	4.25779	19	47801480	47801774							1
ENSG00000205718	MBD3L4	methyl-CpG binding domain protein 3 like 4	13.0022	0.685738	2.65661	1.76084e-10	9.75428	4.24495	19	7037748	7037860							1
ENSG00000163435 /// ENSG00000163435 #or# ENSG00000249007	ELF3	E74 like ETS transcription factor 3 /// E74 like ETS transcription factor 3 #or# NA	59.0149	3.14145	3.73601	3.12538e-31	30.5051	4.23158	1	202015209	202015794							1
ENSG00000128253	RFPL2	ret finger protein like 2	125.612	6.80814	3.93994	3.00032e-57	56.5228	4.20557	22	32190706	32191352							1
ENSG00000251258	RFPL4B	ret finger protein like 4B	17.8386	0.969439	2.82154	1.46103e-12	11.8353	4.20171	6	112350501	112351296							1
ENSG00000095932	SMIM24	small integral membrane protein 24	10.3734	0.569603	2.3299	5.30994e-08	7.27491	4.18679	19	3478820	3478996							1
ENSG00000225899	FRG2B	FSHD region gene 2 family member B	47.2777	2.62328	3.4813	2.15563e-28	27.6664	4.17172	10	133626743	133626795							1
ENSG00000100867	DHRS2	dehydrogenase/reductase 2	347.739	19.5012	4.09501	2.13603e-144	143.67	4.15637	14	23643045	23645639							1
ENSG00000166592	RRAD	RRAD, Ras related glycolysis inhibitor and calcium channel regulator	191.301	10.8725	4.04663	3.69473e-77	76.4324	4.13709	16	66921832	66921990							1
ENSG00000232810	TNF	tumor necrosis factor	23.9236	1.37634	3.17887	8.85788e-16	15.0527	4.11952	6	31577538	31578336							1
ENSG00000277738	AC126175.1	NA	13.7647	0.800538	2.60891	3.22906e-10	9.49092	4.10386	12	91634887	91635644		1					0
ENSG00000204363	SPANXN5	SPANX family member N5	10.2533	0.625903	2.35183	7.55149e-09	8.12197	4.03401	0	52796144	52796487							1
ENSG00000225611	LINC02158	long intergenic non-protein coding RNA 2158	34.5351	2.11351	3.21831	7.82175e-19	18.1067	4.03035	3	42773205	42773635			1				0
ENSG00000131096	PYY	peptide YY	18.5715	1.14274	2.80522	6.98449e-13	12.1559	4.02252	17	43952889	43953104							1
ENSG00000230392	AC004835.1	NA	48.8692	3.03372	3.50588	3.35934e-27	26.4737	4.00977	0	119333050	119335610		1					0
ENSG00000172349	IL16	interleukin 16	11.232	0.742038	2.47161	4.55245e-09	8.34175	3.91997	15	81306423	81306526							1
ENSG00000010030	ETV7	ETS variant 7	38.825	2.57538	3.284	2.76774e-23	22.5579	3.91413	6	36366195	36366644							1
ENSG00000237686	AL109615.3	NA	561.919	38.528	3.85574	2.84699e-199	198.546	3.86638	6	43997182	43997308		1					0
ENSG00000163283	ALPP	alkaline phosphatase, placental	22.2921	1.54258	2.95237	1.81364e-14	13.7414	3.85312	2	232381497	232382609							1
ENSG00000205097	FRG2	FSHD region gene 2	47.0473	3.37239	3.24991	8.61934e-27	26.0645	3.80227	4	190024367	190025560							1
ENSG00000197406	DIO3	iodothyronine deiodinase 3	24.7704	1.88478	2.82299	2.48381e-15	14.6049	3.71615	14	101562412	101563452							1
ENSG00000169429	CXCL8	C-X-C motif chemokine ligand 8	17.1547	1.31651	2.73779	1.17231e-12	11.931	3.70381	4	73741542	73741986							1
ENSG00000229015	AL450472.1	NA	24.0512	1.89098	2.2249	7.308e-07	6.1362	3.6689	0	135397442	135397621		1					0
ENSG00000182315	MBD3L3	methyl-CpG binding domain protein 3 like 3	16.6447	1.31164	2.63841	2.15555e-11	10.6664	3.66562	19	7056209	7056321							1
ENSG00000103196	CRISPLD2	cysteine rich secretory protein LCCL domain containing 2	18.6682	1.47921	2.60413	5.56468e-12	11.2546	3.65768	16	84920397	84920768							1
ENSG00000128422	KRT17	keratin 17	86.4174	7.32058	3.31782	8.99487e-45	44.046	3.56129	17	41622873	41623032							1
ENSG00000241104 /// ENSG00000183668 #or# ENSG00000241104	CEACAMP10	carcinoembryonic antigen related cell adhesion molecule pseudogene 10 /// pregnancy specific beta-1-glycoprotein 9 #or# carcinoembryonic antigen related cell adhesion molecule pseudogene 10	47.119	4.22923	3.11532	2.82819e-24	23.5485	3.47784	19	43219988	43220242	1						0
ENSG00000184343 #or# ENSG00000198753 /// ENSG00000198753	PLXNB3	SRSF protein kinase 3 #or# plexin B3 /// plexin B3	62.4807	5.6592	3.12165	3.49923e-32	31.456	3.46474	0	153778935	153779340							1
ENSG00000133636	NTS	neurotensin	27.4025	2.52395	2.24102	3.70531e-07	6.43118	3.44055	12	85882223	85882799							1
ENSG00000158486	DNAH3	dynein axonemal heavy chain 3	12.0802	1.20037	2.21731	4.03855e-08	7.39377	3.33108	16	21140208	21140710							1
ENSG00000260103	AC012435.1	NA	81.7135	8.23372	3.09474	4.96081e-37	36.3044	3.31096	15	74481025	74481130		1					0
ENSG00000008517	IL32	interleukin 32	66.0093	6.69468	3.10188	1.98648e-32	31.7019	3.30158	16	3068990	3069411							1
ENSG00000100285	NEFH	neurofilament heavy	10.6647	1.19551	1.98308	7.93993e-07	6.10018	3.15715	22	29490704	29491390							1
ENSG00000189143	CLDN4	claudin 4	25.4419	3.02398	2.50807	1.29089e-12	11.8891	3.07268	7	73831832	73832693							1
ENSG00000064300	NGFR	nerve growth factor receptor	46.9616	5.59583	2.70479	1.47431e-22	21.8314	3.06906	17	49513010	49513372							1
ENSG00000169548	ZNF280A	zinc finger protein 280A	11.9441	1.43131	2.19802	4.81832e-08	7.3171	3.0609	22	22513736	22514001							1
ENSG00000049249	TNFRSF9	TNF receptor superfamily member 9	15.6192	1.94595	2.29651	5.80442e-09	8.23624	3.00478	1	7933127	7933296							1
ENSG00000210196	MT-TP	mitochondrially encoded tRNA proline	299.773	39.1646	0.923228	0	?	2.93625	0	15956	16023						1	0
ENSG00000130513	GDF15	growth differentiation factor 15	294.214	38.6082	2.92048	1.45415e-73	72.8374	2.92989	19	18388286	18388484							1
ENSG00000128564	VGF	VGF nerve growth factor inducible	114.761	15.2032	2.79278	6.41587e-45	44.1927	2.91618	7	101162516	101162995							1
ENSG00000118898	PPL	periplakin	16.007	2.16715	2.13137	6.11072e-08	7.21391	2.88484	16	4892755	4893370							1
ENSG00000196754	S100A2	S100 calcium binding protein A2	24.9153	3.60952	2.41684	1.84972e-12	11.7329	2.78715	1	153561349	153561566							1
ENSG00000172602	RND1	Rho family GTPase 1	48.3736	7.14328	2.5416	9.08084e-21	20.0419	2.75956	12	48861030	48861131							1
ENSG00000224854	CDKN2A-DT	CDKN2A divergent transcript	35.0554	5.26337	2.54555	2.52111e-15	14.5984	2.73558	9	21966929	21967751							1
ENSG00000124216	SNAI1	snail family transcriptional repressor 1	24.4943	3.88702	2.13098	4.7131e-12	11.3267	2.65571	20	49988057	49988886							1
ENSG00000175793	SFN	stratifin	10.0242	1.65384	1.81139	6.50045e-06	5.18706	2.59959	1	26863960	26864457							1
ENSG00000168334	XIRP1	xin actin binding repeat containing 1	10.4472	1.77485	1.93065	8.04383e-06	5.09454	2.55736	3	39183216	39183913							1
ENSG00000125740	FOSB	FosB proto-oncogene, AP-1 transcription factor subunit	25.4005	4.45663	2.13672	1.107e-11	10.9559	2.51083	19	45472551	45473067							1
ENSG00000240057	AC078785.1	NA	19.4343	3.76029	1.9653	1.45412e-07	6.8374	2.36969	3	113183053	113183248		1					0
ENSG00000143217	NECTIN4	nectin cell adhesion molecule 4	30.0782	5.9323	1.99796	4.74791e-13	12.3235	2.34206	1	161072140	161072885							1
ENSG00000272501	AL662844.4	NA	12.9173	2.63035	1.77764	5.00735e-06	5.30039	2.29597	6	31195200	31198037		1					0
ENSG00000261346	AC116348.3	NA	17.6454	3.82232	1.71499	7.18485e-07	6.14358	2.20677	16	30477180	30477374		1					0
ENSG00000104856	RELB	RELB proto-oncogene, NF-kB subunit	104.299	23.03	2.14523	2.36321e-30	29.6265	2.17913	19	45037791	45038122							1
ENSG00000099994	SUSD2	sushi domain containing 2	14.341	3.31255	1.74445	6.28024e-06	5.20202	2.11413	22	24188412	24189106							1
ENSG00000182759	MAFA	MAF bZIP transcription factor A	80.617	18.8509	1.96734	3.98294e-26	25.3998	2.09645	8	143428060	143429344							1
ENSG00000210184	MT-TS2	mitochondrially encoded tRNA serine 2 (AGU/C)	20.9194	4.91983	1.80434	7.58676e-08	7.11994	2.08816	0	12207	12265						1	0
ENSG00000159409	CELF3	CUGBP Elav-like family member 3	10.7054	2.56211	1.49305	0.000317232	3.49862	2.06293	1	151708998	151709077							1
ENSG00000184414	IRS3P	insulin receptor substrate 3, pseudogene	10.733	2.56918	1.46962	0.000107154	3.96999	2.06267	7	100570131	100571136	1						0
ENSG00000147437	GNRH1	gonadotropin releasing hormone 1	11.891	2.86128	1.58703	3.04369e-05	4.5166	2.05514	8	25419262	25419418							1
ENSG00000210112 /// ENSG00000198763 #or# ENSG00000210112	MT-TM	mitochondrially encoded tRNA methionine /// mitochondrially encoded NADH:ubiquinone oxidoreductase core subunit 2 #or# mitochondrially encoded tRNA methionine	69.1948	16.8509	1.53204	3.16523e-05	4.4996	2.03784	0	4402	4469						1	0
ENSG00000265799	AC090844.3	NA	12.9422	0	2.91873	1.77836e-11	10.75	?	17	40012544	40012804		1					0
ENSG00000218052	ADAMTS7P4	ADAMTS7 pseudogene 4	13.4528	0	3.11218	4.85484e-13	12.3138	?	15	85326394	85327060	1						0
ENSG00000173110	HSPA6	heat shock protein family A (Hsp70) member 6	16.0201	249.707	-3.87706	2.94354e-100	99.5311	-3.96228	1	161526591	161526910							1
ENSG00000225217	HSPA7	heat shock protein family A (Hsp70) member 7	0.561765	12.2174	-2.6937	7.69807e-10	9.11362	-4.44283	1	161606291	161608217							1
