# Supplementary material for: The role of reciprocal fusions in MLL-r acute leukemia: studying the chromosomal translocation t(6;11)
Source: Oncogene. 2021 Aug 5;40(40):5902–12. doi: 10.1038/s41388-021-01983-3 (PMC8497272; doi:10.1038/s41388-021-01983-3)
Supplement: Supplementary file 3 — MACE-Seq AF6-MLL [file 41388_2021_1983_MOESM3_ESM.xlsx]

## Sheet: Sheet1
ID	gene symbol	gene name	mean exp	mean mock	log2	pvalue	minus log 10	var-log2	chrom	begin	end	PG	NA	LINC	MIR	SNO	MT	PCG
ENSG00000226138	AC004801.1	NA	35.6791	0.856838	3.74094	7.37061e-22	21.1325	5.37991	12	48085062	48085421		1					0
ENSG00000197989 #or# ENSG00000278274	SNORA61	small nucleolar RNA host gene 12 #or# small nucleolar RNA, H/ACA box 61	14.6441	0.398502	2.73542	2.76158e-10	9.55884	5.19959	1	28579764	28579893					1		0
ENSG00000283016	AL139353.3	NA	53.8225	1.48274	3.93961	3.44228e-30	29.4632	5.18187	14	31320224	31320634		1					0
ENSG00000213492	NT5C3AP1	5'-nucleotidase, cytosolic IIIA pseudogene 1	12.1424	0.514637	2.56423	6.67342e-09	8.17565	4.56036	4	117575098	117576109	1						0
ENSG00000231357	AC006028.1	NA	23.0091	1.02441	3.07281	2.66932e-14	13.5736	4.48934	7	2835621	2836022		1					0
ENSG00000210107	MT-TQ	mitochondrially encoded tRNA glutamine	33.258	1.53771	1.30445	0.00397971	2.40015	4.43485	0	4329	4400						1	0
ENSG00000240972	MIF	macrophage migration inhibitory factor	1854.22	91.3181	4.27718	0	?	4.34377	22	23895040	23895227							1
ENSG00000258613	RPL21P7	ribosomal protein L21 pseudogene 7	85.0389	4.50319	3.66114	5.72609e-41	40.2421	4.2391	14	65266638	65267008	1						0
ENSG00000256211	AC023512.1	NA	20.5904	1.19904	2.82868	2.20969e-13	12.6557	4.10202	12	16989876	16989936		1					0
ENSG00000239200	RPL22P20	ribosomal protein L22 pseudogene 20	34.832	2.33471	2.97626	1.26103e-18	17.8993	3.8991	14	18692032	18692408	1						0
ENSG00000176340 #or# ENSG00000256100	AP000721.1	cytochrome c oxidase subunit 8A #or# NA	540.526	37.0237	3.72757	5.61005e-180	179.251	3.86784	11	63988344	63988346		1					0
ENSG00000217130	AL139100.1	NA	247.778	17.4613	3.63025	6.3465e-95	94.1975	3.82682	6	34744176	34744673		1					0
ENSG00000230897	RPS18P12	ribosomal protein S18 pseudogene 12	1748.69	123.875	3.71199	7.97011e-162	161.099	3.81932	17	14705076	14705534	1						0
ENSG00000258956	COX4I1P1	cytochrome c oxidase subunit 4I1 pseudogene 1	26.0818	1.88124	2.82731	4.07619e-15	14.3897	3.79328	14	61831861	61832369	1						0
ENSG00000272888 #or# ENSG00000279765 /// ENSG00000279765	AC013394.1	NA /// long intergenic non-protein coding RNA 1578 #or# NA	24.0158	1.76864	2.68437	1.35726e-11	10.8673	3.76327	15	92948952	92949230		1					0
ENSG00000234559	RPL22P7	ribosomal protein L22 pseudogene 7	48.6705	3.60332	3.21399	8.68448e-26	25.0613	3.75565	2	129939848	129940217	1						0
ENSG00000243678	NME2	NME/NM23 nucleoside diphosphate kinase 2	36.261	2.73808	2.98677	6.56527e-20	19.1827	3.72718	17	51171487	51171608							1
ENSG00000213935	RPL22P16	ribosomal protein L22 pseudogene 16	365.156	27.7106	3.39918	2.72671e-43	42.5644	3.72	7	4865432	4865804	1						0
ENSG00000234213	FHP1	fumarate hydratase pseudogene 1	14.8345	1.13921	2.34845	9.77853e-09	8.00973	3.70285	13	42255873	42256575	1						0
ENSG00000233503	HNRNPLP1	heterogeneous nuclear ribonucleoprotein L pseudogene 1	13.1601	1.02441	2.31403	1.04382e-07	6.98137	3.68331	6	7481094	7482594	1						0
ENSG00000198695 #or# ENSG00000210194 /// ENSG00000210194	MT-TE	mitochondrially encoded NADH:ubiquinone oxidoreductase core subunit 6 #or# mitochondrially encoded tRNA glutamic acid /// mitochondrially encoded tRNA glutamic acid	916.463	72.1852	3.06853	2.2466e-20	19.6485	3.6663	0	14674	14742						1	0
ENSG00000105583 #or# ENSG00000269590	AC010422.5	WD repeat domain 83 opposite strand #or# NA	15.4189	1.25534	2.38194	5.21111e-09	8.28307	3.61855	19	12664828	12664985		1					0
ENSG00000227514	AC107890.1	NA	22.3938	1.82628	2.74384	2.64134e-13	12.5782	3.61612	8	113377065	113377227		1					0
ENSG00000210196	MT-TP	mitochondrially encoded tRNA proline	439.965	39.1646	1.19291	0	?	3.48977	0	15956	16023						1	0
ENSG00000233839	AL357055.1	NA	969.169	87.223	3.3986	5.52006e-243	242.258	3.47397	1	113168994	113169403		1					0
ENSG00000230291	AC078817.1	NA	1593.12	143.751	3.41651	0	?	3.47021	12	80102899	80103333		1					0
ENSG00000268993	RPL22P6	ribosomal protein L22 pseudogene 6	50.2049	4.73766	2.88688	7.66834e-24	23.1153	3.40558	1	121142051	121142438	1						0
ENSG00000235332	RPSAP76	ribosomal protein SA pseudogene 76	11.9565	1.13921	2.0851	6.6165e-07	6.17937	3.39169	9	125194649	125194913	1						0
ENSG00000225483	RPL22P4	ribosomal protein L22 pseudogene 4	43.538	4.15746	2.85393	1.54581e-21	20.8108	3.3885	1	206160887	206161276	1						0
ENSG00000225616	AL138785.1	NA	1475.76	148.647	3.17258	6.24966e-74	73.2041	3.3115	1	28982278	28982608		1					0
ENSG00000241081	RPL22P2	ribosomal protein L22 pseudogene 2	164.554	16.9036	3.1137	7.61265e-59	58.1185	3.28315	14	76886377	76886750	1						0
ENSG00000173163 #or# ENSG00000242735	RPSAP26	copper metabolism domain containing 1 #or# ribosomal protein SA pseudogene 26	77.9235	8.05155	2.99081	1.59746e-35	34.7966	3.27472	2	62146413	62147153	1						0
ENSG00000261461	UBE2MP1	ubiquitin conjugating enzyme E2 M pseudogene 1	13.7861	1.43131	2.25856	2.25579e-08	7.6467	3.2678	16	35169692	35170241	1						0
ENSG00000210135 /// ENSG00000210135 #or# ENSG00000210140 /// ENSG00000210127 #or# ENSG00000210135	MT-TN	mitochondrially encoded tRNA asparagine #or# mitochondrially encoded tRNA cysteine /// mitochondrially encoded tRNA alanine #or# mitochondrially encoded tRNA asparagine /// mitochondrially encoded tRNA asparagine	345.926	37.0675	2.59613	2.18129e-13	12.6613	3.22224	0	5657	5729						1	0
ENSG00000232388 #or# ENSG00000284776	AL121900.2	small integral membrane protein 26 #or# NA	82.2113	8.84235	2.88673	2.80853e-32	31.5515	3.21683	20	18567453	18567478		1					0
ENSG00000227621	PHBP11	prohibitin pseudogene 11	12.0593	1.31164	2.1265	1.36459e-06	5.865	3.2007	1	223856579	223857387	1						0
ENSG00000235605	AL355472.2	NA	1195.33	130.017	3.09028	4.43962e-85	84.3527	3.20063	1	234356704	234357141		1					0
ENSG00000231991	ANXA2P2	annexin A2 pseudogene 2	29.5266	3.25005	2.45623	1.71096e-14	13.7668	3.18348	9	33624274	33625293	1						0
ENSG00000118058	KMT2A	lysine methyltransferase 2A	2884.69	317.779	3.0852	8.5557e-87	86.0677	3.18232	11	118521897	118522409							1
ENSG00000242041	RPL35AP28	ribosomal protein L35a pseudogene 28	325.592	37.1731	2.77691	9.57463e-24	23.0189	3.13073	12	49863173	49863503	1						0
ENSG00000253173	H2AFZP2	H2A histone family member Z pseudogene 2	31.5291	3.59979	2.61648	1.20931e-14	13.9175	3.1307	8	70103798	70104179	1						0
ENSG00000268074	RPL22P5	ribosomal protein L22 pseudogene 5	31.7547	3.65609	2.62942	5.81002e-16	15.2358	3.1186	1	143929994	143930382	1						0
ENSG00000213711	PHBP7	prohibitin pseudogene 7	46.5431	5.3671	2.66802	5.0661e-21	20.2953	3.11635	9	85898903	85899716	1						0
ENSG00000263464	PPIAL4C	peptidylprolyl isomerase A like 4C	43.2077	5.07766	2.63503	3.564e-20	19.4481	3.08905	1	149584393	149584464							1
ENSG00000105379 #or# ENSG00000269403 /// ENSG00000160318 #or# ENSG00000269403	AC008750.8	electron transfer flavoprotein subunit beta #or# NA /// claudin domain containing 2 #or# NA	26.2524	3.19642	2.45663	3.28441e-13	12.4835	3.03792	19	51350373	51350391		1					0
ENSG00000260689	HNRNPA3P11	heterogeneous nuclear ribonucleoprotein A3 pseudogene 11	14.8913	1.82141	2.14077	1.83401e-07	6.7366	3.03135	15	57246960	57247893	1						0
ENSG00000279483	AC090498.1	NA	3428.98	425.024	2.85696	5.52879e-46	45.2574	3.01216	7	137513859	137513933		1					0
ENSG00000228168	HNRNPA1P21	heterogeneous nuclear ribonucleoprotein A1 pseudogene 21	24.0312	3.02045	2.28337	5.81259e-10	9.23563	2.99207	3	39334979	39335939	1						0
ENSG00000260326	PHBP21	prohibitin pseudogene 21	23.6765	2.97875	2.46097	1.15925e-11	10.9358	2.99068	16	52934813	52935635	1						0
ENSG00000235787	AC092047.1	NA	27.9772	3.53995	2.45513	1.41297e-11	10.8499	2.98245	3	42469640	42469879		1					0
ENSG00000237064	EIF3IP1	eukaryotic translation initiation factor 3 subunit I pseudogene 1	14.7513	1.87771	2.06261	2.65163e-07	6.57649	2.9738	7	109959218	109960184	1						0
ENSG00000227063	RPL41P1	ribosomal protein L41 pseudogene 1	3327.9	426.572	2.79767	6.97881e-41	40.1562	2.96375	20	21755270	21755350	1						0
ENSG00000231416	AL358472.1	NA	1680.87	218.006	2.83597	2.08019e-62	61.6819	2.94677	1	153995632	153995960		1					0
ENSG00000257243	AC020612.1	NA	22.2385	2.90918	2.26599	1.04546e-10	9.98069	2.93437	12	49595148	49595688		1					0
ENSG00000214009	PCNAP3	proliferating cell nuclear antigen pseudogene 3	11.7967	1.54391	2.01337	2.15254e-06	5.66705	2.93373	0	46058751	46059528	1						0
ENSG00000235546	AC087499.4	NA	10.827	1.42291	1.92636	3.22581e-06	5.49136	2.92772	17	20612667	20614008		1					0
ENSG00000215035	FDPSP5	farnesyl diphosphate synthase pseudogene 5	20.2996	2.68665	2.20615	4.51498e-09	8.34534	2.91757	0	44476027	44476622	1						0
ENSG00000225487	AL390119.1	NA	286.219	38.0649	2.78613	1.45134e-77	76.8382	2.91059	1	164921318	164921629		1					0
ENSG00000270230	MTND6P22	mitochondrially encoded NADH:ubiquinone oxidoreductase core subunit 6 pseudogene 22	14.922	1.99738	2.0902	8.11023e-09	8.09097	2.90126	5	100046450	100046970	1						0
ENSG00000219085	NPM1P37	nucleophosmin 1 pseudogene 37	52.8816	7.07991	2.59144	6.19287e-21	20.2081	2.90096	6	69705287	69706160	1						0
ENSG00000243504	RPS23P1	ribosomal protein S23 pseudogene 1	28.9579	3.88216	2.35134	1.13875e-11	10.9436	2.89902	8	97865054	97865485	1						0
ENSG00000230626	AC011005.1	NA	40.7852	5.48103	2.45433	5.26719e-15	14.2784	2.89553	7	129130749	129130793		1					0
ENSG00000241723	AC074276.1	NA	28.2527	3.82232	2.35749	6.21403e-12	11.2066	2.88587	3	158275809	158276421		1					0
ENSG00000283621 /// ENSG00000135446 #or# ENSG00000283621	MIR6759	microRNA 6759 /// cyclin dependent kinase 4 #or# microRNA 6759	25.8563	3.53509	2.30348	1.11452e-11	10.9529	2.8707	12	57748618	57748682				1			0
ENSG00000243777	AP000942.1	NA	84.9246	11.6367	2.63006	1.46897e-29	28.833	2.8675	11	102295060	102295806		1					0
ENSG00000271072	PHBP20	prohibitin pseudogene 20	21.6323	2.96768	2.19428	1.40863e-09	8.8512	2.86578	15	72450657	72451474	1						0
ENSG00000187193 #or# ENSG00000259827	AC026461.1	metallothionein 1X #or# NA	82.675	11.4239	2.6455	1.58264e-33	32.8006	2.85539	16	56687578	56687807		1					0
ENSG00000186743	TPI1P3	triosephosphate isomerase 1 pseudogene 3	13.1645	1.82981	2.02953	5.69765e-07	6.2443	2.84689	6	116038756	116039495	1						0
ENSG00000258802	AL139317.2	NA	59.7274	8.38935	2.58678	1.21011e-26	25.9172	2.83176	14	52798904	52799061		1					0
ENSG00000224820	BTF3P4	basic transcription factor 3 pseudogene 4	62.8354	8.83882	2.49738	7.55955e-25	24.1215	2.82965	9	72107818	72108312	1						0
ENSG00000264186	SNRPCP4	small nuclear ribonucleoprotein polypeptide C pseudogene 4	18.7805	2.67958	2.18488	2.03648e-08	7.69112	2.80915	18	2990652	2991078	1						0
ENSG00000213942	AC005840.1	NA	1878.18	269.01	2.73361	1.8087e-88	87.7426	2.80361	12	6409637	6410013		1					0
ENSG00000226457	RPL22P3	ribosomal protein L22 pseudogene 3	28.1216	4.04839	2.24003	1.68876e-11	10.7724	2.79626	1	16369150	16369530	1						0
ENSG00000213177	PRDX2P4	peroxiredoxin 2 pseudogene 4	78.9768	11.474	2.51539	1.31411e-24	23.8814	2.78306	6	100136064	100136663	1						0
ENSG00000237972	TUBG1P	tubulin gamma 1 pseudogene	10.9541	1.59754	1.77801	3.10566e-05	4.50785	2.77755	7	43918697	43920054	1						0
ENSG00000231369	Z97353.1	NA	142.987	20.9374	2.58996	4.24304e-47	46.3723	2.77173	22	26886909	26887316		1					0
ENSG00000213452	AKR1B1P2	aldo-keto reductase family 1 member B1 pseudogene 2	17.1105	2.50581	1.99197	3.45147e-07	6.462	2.77154	3	74135959	74136892	1						0
ENSG00000243538	RPS26P28	ribosomal protein S26 pseudogene 28	105.997	15.5743	2.5882	2.26338e-41	40.6452	2.76678	5	16902294	16902641	1						0
ENSG00000220924	OSTCP4	oligosaccharyltransferase complex subunit pseudogene 4	14.7622	2.17201	2.03885	4.22407e-07	6.37427	2.76481	4	112685055	112685503	1						0
ENSG00000254780	AC023232.1	NA	133.582	19.7002	2.61834	8.81803e-43	42.0546	2.76145	11	47905323	47905607		1					0
ENSG00000218502	H2AFZP3	H2A histone family member Z pseudogene 3	74.1069	10.9656	2.51932	3.86754e-25	24.4126	2.75662	13	99215372	99215758	1						0
ENSG00000105988	NHP2P1	NHP2 ribonucleoprotein pseudogene 1	114.918	17.0637	2.55235	4.36657e-39	38.3599	2.7516	10	92216332	92216793	1						0
ENSG00000170540 #or# ENSG00000260342 /// ENSG00000134419 #or# ENSG00000260342	AC138811.2	ribosomal protein S15a #or# NA /// ADP ribosylation factor like GTPase 6 interacting protein 1 #or# NA	1750.25	260.076	2.66087	1.96039e-66	65.7077	2.75055	16	18801467	18801519		1					0
ENSG00000254132	MTND6P3	mitochondrially encoded NADH:ubiquinone oxidoreductase core subunit 6 pseudogene 3	21.8553	3.30415	2.12395	7.80561e-09	8.10759	2.72563	5	94568929	94569470	1						0
ENSG00000210144 /// ENSG00000210140 #or# ENSG00000210144	MT-TY	mitochondrially encoded tRNA cysteine #or# mitochondrially encoded tRNA tyrosine /// mitochondrially encoded tRNA tyrosine	202.806	30.7531	2.10953	1.30513e-08	7.88435	2.7213	0	5826	5891						1	0
ENSG00000214460	TPT1P6	tumor protein, translationally-controlled 1 pseudogene 6	21.3238	3.31255	2.15952	2.79037e-09	8.55434	2.68645	6	85427453	85427966	1						0
ENSG00000243886	AC117440.1	NA	14.7776	2.33958	1.93446	5.71945e-07	6.24265	2.65909	3	137535572	137536142		1					0
ENSG00000231300	EZH2P1	enhancer of zeste 2 polycomb repressive complex 2 subunit pseudogene 1	21.0829	3.36752	2.09132	6.20304e-09	8.2074	2.64632	21	35599732	35600022	1						0
ENSG00000254935	AP002469.1	NA	14.6134	2.33825	1.87723	9.34853e-07	6.02926	2.64379	11	122618851	122619274		1					0
ENSG00000225787	LSM3P3	LSM3 homolog, U6 small nuclear RNA and mRNA degradation associated pseudogene 3	55.7508	8.95495	2.33687	1.19306e-20	19.9233	2.63823	2	85102389	85102694	1						0
ENSG00000237631	AL161454.1	NA	15.6311	2.51202	1.98827	3.68355e-07	6.43373	2.6375	9	95918136	95918704		1					0
ENSG00000237264	FTH1P11	ferritin heavy chain 1 pseudogene 11	89.3133	14.4918	2.38791	4.33716e-28	27.3628	2.62364	8	81521682	81522232	1						0
ENSG00000230171	RPL22P18	ribosomal protein L22 pseudogene 18	22.9324	3.76115	2.03943	9.62018e-10	9.01682	2.60814	10	80125941	80126317	1						0
ENSG00000233080	LINC01399	long intergenic non-protein coding RNA 1399	22.6347	3.76469	2.01743	8.99056e-10	9.04621	2.58793	22	35194699	35194942			1				0
ENSG00000004059	ARF5	ADP ribosylation factor 5	60.397	10.1629	2.40328	4.58484e-23	22.3387	2.57117	7	127589485	127589831							1
ENSG00000229251	HNRNPA1P8	heterogeneous nuclear ribonucleoprotein A1 pseudogene 8	44.313	7.65391	2.21119	1.40926e-15	14.851	2.53346	7	84983556	84984506	1						0
ENSG00000259707	AC105339.4	NA	32.9979	5.70843	2.17251	8.9082e-13	12.0502	2.53121	15	82691723	82692358		1					0
ENSG00000226421	SLC25A5P5	solute carrier family 25 member 5 pseudogene 5	48.443	8.39595	2.23632	7.7568e-17	16.1103	2.52852	7	32471513	32472409	1						0
ENSG00000231302	RPL36P2	ribosomal protein L36 pseudogene 2	246.773	42.9467	2.42481	1.06698e-65	64.9718	2.52257	20	50620763	50621077	1						0
ENSG00000236565	HNRNPA3P5	heterogeneous nuclear ribonucleoprotein A3 pseudogene 5	60.8921	10.6123	2.23689	1.51472e-17	16.8197	2.52051	13	65787932	65788764	1						0
ENSG00000213197	AC012066.1	NA	14.377	2.50715	1.84785	1.72756e-06	5.76257	2.51965	2	152389937	152390630		1					0
ENSG00000236646	LAMTOR5P1	late endosomal/lysosomal adaptor, MAPK and MTOR activator 5 pseudogene 1	14.0685	2.45571	1.87125	7.97826e-07	6.09809	2.51825	1	62038842	62039111	1						0
ENSG00000111775 #or# ENSG00000111780 /// ENSG00000111780 #or# ENSG00000257218	AL021546.1	NA #or# glutamyl-tRNA amidotransferase subunit C /// cytochrome c oxidase subunit 6A1 #or# NA	204.822	35.8583	2.4083	2.25929e-53	52.646	2.51399	12	120459960	120460006		1					0
ENSG00000139180 #or# ENSG00000255639 /// ENSG00000139180 #or# ENSG00000272921 /// as__ENSG00000139180 #or# as__ENSG00000272921 /// as__ENSG00000139180 #or# as__ENSG00000255639 /// ENSG00000139180 #or# ENSG00000255639 #or# ENSG00000272921	AC005833.2	NADH:ubiquinone oxidoreductase subunit A9 #or# NA /// NADH:ubiquinone oxidoreductase subunit A9 #or# NA #or# NA	49.3227	8.73509	2.27863	1.19835e-18	17.9214	2.49736	12	4744517	4744581		1					0
ENSG00000215895	AL354702.1	NA	84.6602	15.0774	2.33041	6.58615e-25	24.1814	2.4893	1	38708931	38710890		1					0
ENSG00000134825 #or# ENSG00000284108	MIR611	transmembrane protein 258 #or# microRNA 611	163.601	29.2115	2.36436	8.41557e-44	43.0749	2.48557	11	61792495	61792561				1			0
ENSG00000225462	FDPSP1	farnesyl diphosphate synthase pseudogene 1	13.7292	2.45438	1.78256	3.49478e-06	5.45658	2.48382	1	187563061	187564131	1						0
ENSG00000232499	AL391058.1	NA	14.9329	2.68045	1.79441	8.60006e-06	5.0655	2.47795	1	113449700	113450728		1					0
ENSG00000130208 #or# ENSG00000280087 /// ENSG00000280087	AC011481.3	NA /// apolipoprotein C1 #or# NA	132.842	23.8528	2.34252	3.4352e-35	34.464	2.47748	19	44909375	44914968		1					0
ENSG00000236603	RANP1	RAN, member RAS oncogene family pseudogene 1	175.208	31.6163	2.38051	1.25348e-55	54.9019	2.47033	6	30485940	30486590	1						0
ENSG00000228938	SNRPD2P1	small nuclear ribonucleoprotein D2 pseudogene 1	386.189	70.2946	2.40918	9.98503e-101	100.001	2.45782	10	89978717	89979070	1						0
ENSG00000213126	AC092642.1	NA	27.1915	4.96153	2.00627	4.13815e-10	9.38319	2.4543	2	179814251	179814675		1					0
ENSG00000235211	TMSB10P2	thymosin beta 10 pseudogene 2	27.7824	5.07986	1.99287	1.28033e-11	10.8927	2.45131	0	18341216	18341346	1						0
ENSG00000220583	RPL35P2	ribosomal protein L35 pseudogene 2	1525.92	279.631	2.41898	6.32374e-179	178.199	2.44808	6	34263311	34263673	1						0
ENSG00000249119	MTND6P4	mitochondrially encoded NADH:ubiquinone oxidoreductase core subunit 6 pseudogene 4	233.016	42.8496	2.18303	7.85108e-16	15.1051	2.44307	5	134924123	134924644	1						0
ENSG00000225715	AL512504.1	NA	13.8474	2.56565	1.72025	7.05883e-06	5.15127	2.43222	0	80709928	80710705		1					0
ENSG00000227176	AC092641.1	NA	11.9521	2.22345	1.68219	2.17076e-05	4.66339	2.42639	2	170077224	170077594		1					0
ENSG00000237285	HNRNPA1P2	heterogeneous nuclear ribonucleoprotein A1 pseudogene 2	31.7197	5.9345	2.02126	6.44433e-10	9.19082	2.41818	6	32325219	32326178	1						0
ENSG00000230508	RPL19P21	ribosomal protein L19 pseudogene 21	50.6009	9.48286	2.18896	7.33398e-18	17.1347	2.41577	0	150993501	150994091	1						0
ENSG00000213409	C1QBPP2	complement C1q binding protein pseudogene 2	76.3302	14.3921	2.28297	7.09915e-26	25.1488	2.40698	11	66761575	66762399	1						0
ENSG00000264281	AC016596.2	NA	340.694	64.5569	2.28049	3.40304e-34	33.4681	2.39983	5	55944656	55944733		1					0
ENSG00000235064	SLC25A5P2	solute carrier family 25 member 5 pseudogene 2	20.2754	3.88082	1.88022	1.79823e-07	6.74516	2.38529	2	33839782	33840678	1						0
ENSG00000261395	HSPE1P5	heat shock protein family E (Hsp10) member 1 pseudogene 5	87.3214	16.8411	2.20333	6.50185e-28	27.187	2.37435	16	68686399	68686670	1						0
ENSG00000224415	AC007683.1	NA	124.128	24.0372	2.22828	1.98427e-36	35.7024	2.36849	7	103141349	103141939		1					0
ENSG00000215006	CHCHD2P2	coiled-coil-helix-coiled-coil-helix domain containing 2 pseudogene 2	21.4989	4.16806	1.89604	2.91854e-08	7.53483	2.36681	5	69333929	69334249	1						0
ENSG00000213684	LDHBP2	lactate dehydrogenase B pseudogene 2	272.689	53.152	2.28834	1.17423e-74	73.9302	2.35906	0	76334841	76335845	1						0
ENSG00000175768	TOMM5	translocase of outer mitochondrial membrane 5	105.984	20.7681	2.22952	3.49791e-33	32.4562	2.3514	9	37588642	37588932							1
ENSG00000256745	AP002784.2	NA	139.594	27.6632	2.20724	1.51272e-37	36.8202	2.3352	11	94188449	94188997		1					0
ENSG00000089820 /// ENSG00000089820 #or# ENSG00000102030	ARHGAP4	Rho GTPase activating protein 4 #or# N(alpha)-acetyltransferase 10, NatA catalytic subunit /// Rho GTPase activating protein 4	48.9355	9.69786	2.00731	1.26441e-15	14.8981	2.33514	0	153920739	153920808							1
ENSG00000249098	AC055733.1	NA	36.215	7.24748	2.066	1.18697e-12	11.9256	2.32104	3	130918226	130918703		1					0
ENSG00000280346	FP236240.3	NA	13.3485	2.68178	1.62987	3.03607e-05	4.51769	2.31541	21	6507017	6507389		1					0
ENSG00000256393	RPL41P5	ribosomal protein L41 pseudogene 5	369.703	74.4605	2.2385	7.63612e-83	82.1171	2.31182	12	93083598	93083675	1						0
ENSG00000213312	RPL7AP34	ribosomal protein L7a pseudogene 34	56.9172	11.4824	2.11672	6.966e-20	19.157	2.30944	6	63548708	63549508	1						0
ENSG00000224834	BTF3P9	basic transcription factor 3 pseudogene 9	158.386	32.0334	2.23847	7.36599e-41	40.1328	2.3058	1	227434064	227434346	1						0
ENSG00000232883	AL451081.2	NA	19.6954	4.00182	1.86176	1.75585e-07	6.75551	2.29913	1	220316667	220317599		1					0
ENSG00000229399	AL592148.1	NA	20.6299	4.22082	1.83152	1.29884e-07	6.88645	2.28914	1	222641414	222641858		1					0
ENSG00000228143	AL512649.1	NA	11.4333	2.33958	1.63964	8.17638e-05	4.08744	2.28892	9	106722350	106722930		1					0
ENSG00000232777	MRPL51P2	mitochondrial ribosomal protein L51 pseudogene 2	18.2598	3.76382	1.75093	1.79435e-06	5.74609	2.2784	21	43115334	43115709	1						0
ENSG00000271711	AC069236.1	NA	11.0832	2.28815	1.6163	6.87964e-05	4.16243	2.27612	3	150611262	150611877		1					0
ENSG00000244361	RPL30P7	ribosomal protein L30 pseudogene 7	21.3237	4.40386	1.86571	2.18396e-07	6.66076	2.27562	5	10488820	10489142	1						0
ENSG00000233594	BTF3P5	basic transcription factor 3 pseudogene 5	119.223	24.6595	2.14347	3.74494e-29	28.4266	2.27344	2	55435156	55435622	1						0
ENSG00000236334	PPIAL4G	peptidylprolyl isomerase A like 4G	46.2455	9.63849	2.03848	2.2521e-15	14.6474	2.26243	1	148479824	148482757							1
ENSG00000225695	HNRNPA1P35	heterogeneous nuclear ribonucleoprotein A1 pseudogene 35	58.7973	12.2688	2.07568	1.12975e-17	16.947	2.26075	2	201063089	201064051	1						0
ENSG00000219532	SELENOKP2	selenoprotein K pseudogene 2	31.4678	6.57014	2.02601	7.67625e-11	10.1149	2.25988	6	131819803	131820091	1						0
ENSG00000259917	HNRNPLP2	heterogeneous nuclear ribonucleoprotein L pseudogene 2	19.783	4.17426	1.85591	2.50782e-07	6.6007	2.24467	15	34489002	34490571	1						0
ENSG00000224488	SAMM50P1	SAMM50 sorting and assembly machinery component pseudogene 1	14.3662	3.03239	1.68522	7.96727e-06	5.09869	2.24415	9	17447145	17448543	1						0
ENSG00000213956	AC112187.1	NA	11.0525	2.33605	1.60851	4.45614e-05	4.35104	2.24223	5	50633124	50633602		1					0
ENSG00000257074	RPL29P33	ribosomal protein L29 pseudogene 33	31.9515	6.78561	1.96344	3.49877e-11	10.4561	2.23533	19	34296277	34296592	1						0
ENSG00000185839	AL035411.1	NA	35.7665	7.64331	1.89958	1.51477e-11	10.8197	2.22634	1	58630841	58631530		1					0
ENSG00000225496	AC104651.1	NA	95.0232	20.3882	2.07886	1.15952e-25	24.9357	2.22055	2	111940302	111941036		1					0
ENSG00000206228	HNRNPA1P4	heterogeneous nuclear ribonucleoprotein A1 pseudogene 4	59.8303	12.8393	2.00169	3.43075e-18	17.4646	2.22031	8	82291624	82292379	1						0
ENSG00000258563	PSMA3P	proteasome subunit alpha 3 pseudogene	10.6213	2.28108	1.61007	6.81571e-05	4.16649	2.21918	14	60179382	60180016	1						0
ENSG00000224114	AL591846.1	NA	49.5482	10.6762	2.0259	3.52314e-16	15.4531	2.21444	1	206695837	206696269		1					0
ENSG00000235165	CDK5P1	cyclin dependent kinase 5 pseudogene 1	20.0652	4.33343	1.79188	3.37607e-07	6.47159	2.21112	8	122769274	122770150	1						0
ENSG00000265646	TUFMP1	Tu translation elongation factor, mitochondrial pseudogene 1	61.0187	13.1855	2.03135	1.79842e-17	16.7451	2.2103	17	27082690	27084036	1						0
ENSG00000067057 #or# ENSG00000278419	AL451164.3	phosphofructokinase, platelet #or# NA	16.5612	3.59626	1.79231	4.48899e-07	6.34785	2.20324	10	3144971	3145166		1					0
ENSG00000234289 /// as__ENSG00000234289 /// ENSG00000274559 /// as__ENSG00000274559	H2BFS	H2B histone family member S	14.4121	3.13525	1.54904	3.46583e-05	4.46019	2.20063	21	43565620	43565648							1
ENSG00000255059	PPIAP43	peptidylprolyl isomerase A pseudogene 43	49.025	10.7214	1.95712	1.32125e-14	13.879	2.19303	11	100666459	100666962	1						0
ENSG00000214263	RPSAP53	ribosomal protein SA pseudogene 53	14.8716	3.25272	1.70603	4.88883e-06	5.3108	2.19284	13	67266845	67267706	1						0
ENSG00000283041 #or# ENSG00000284135	MIR3654	NA #or# microRNA 3654	1205.54	264.307	2.15862	2.40543e-184	183.619	2.1894	7	133034860	133034915				1			0
ENSG00000213383	AC104297.1	NA	46.5693	10.3925	1.99916	2.0042e-15	14.6981	2.16384	3	17871729	17872598		1					0
ENSG00000215086	NPM1P24	nucleophosmin 1 pseudogene 24	237.224	53.0346	2.12326	9.95782e-55	54.0018	2.16124	10	72917641	72918534	1						0
ENSG00000207524	RNU6-33P	RNA, U6 small nuclear 33, pseudogene	24.088	5.42073	1.43972	0.000456081	3.34096	2.15176	4	88684848	88684954	1						0
ENSG00000232387	SKA2P1	spindle and kinetochore associated complex subunit 2 pseudogene 1	35.3156	7.99038	1.86475	4.24116e-11	10.3725	2.14397	9	122761844	122762233	1						0
ENSG00000220739	AL513475.2	NA	10.8117	2.44865	1.55225	0.000125266	3.90217	2.14254	6	144708106	144708497		1					0
ENSG00000235808	MYL6P2	myosin light chain 6 pseudogene 2	23.1885	5.2523	1.72691	2.00096e-07	6.69876	2.14239	21	39488327	39488760	1						0
ENSG00000240371	RPS4XP13	ribosomal protein S4X pseudogene 13	1173.54	266.615	2.08458	1.74983e-56	55.757	2.13804	11	57576292	57577080	1						0
ENSG00000242960	FTH1P23	ferritin heavy chain 1 pseudogene 23	58.922	13.4102	1.94153	1.23947e-16	15.9068	2.13547	3	72929044	72929593	1						0
ENSG00000233028	AC006970.2	NA	17.2308	3.93006	1.68243	6.26224e-06	5.20327	2.13237	7	56175634	56176412		1					0
ENSG00000219806	ATP5PBP6	ATP synthase peripheral stalk-membrane subunit b pseudogene 6	13.0157	2.96902	1.58606	5.12952e-05	4.28992	2.1322	6	139614438	139615204	1						0
ENSG00000270706	PRMT1P1	protein arginine methyltransferase 1 pseudogene 1	53.1921	12.1536	1.90791	1.32582e-15	14.8775	2.12983	5	177265580	177266588	1						0
ENSG00000258373	SLC25A3P2	solute carrier family 25 member 3 pseudogene 2	63.1594	14.4466	1.93418	2.06626e-16	15.6848	2.12827	12	111992996	111993875	1						0
ENSG00000254406	AP001994.1	NA	46.0966	10.5622	1.92263	4.81366e-13	12.3175	2.12574	11	119821304	119822129		1					0
ENSG00000234782	TPT1P9	tumor protein, translationally-controlled 1 pseudogene 9	788.579	181.258	2.08541	3.43421e-107	106.464	2.12121	9	118082869	118083382	1						0
ENSG00000115541 #or# ENSG00000270757 /// ENSG00000115540 #or# ENSG00000270757	HSPE1-MOB4	heat shock protein family E (Hsp10) member 1 #or# HSPE1-MOB4 readthrough /// MOB family member 4, phocein #or# HSPE1-MOB4 readthrough	176.173	40.5911	2.07667	1.11436e-47	46.953	2.11775	2	197550647	197550726							1
ENSG00000276180	HIST1H4I	histone cluster 1 H4 family member i	96.5508	22.2531	2.00058	9.51899e-27	26.0214	2.11728	6	27139621	27139881							1
ENSG00000257847	LSM3P2	LSM3 homolog, U6 small nuclear RNA and mRNA degradation associated pseudogene 2	16.3382	3.77089	1.60501	1.11447e-05	4.95293	2.11527	12	94590821	94591093	1						0
ENSG00000232187	FTH1P7	ferritin heavy chain 1 pseudogene 7	141.867	32.802	1.99887	4.25244e-33	32.3714	2.11268	13	22696023	22696574	1						0
ENSG00000258895	AC104390.1	NA	23.1227	5.36356	1.74074	8.57161e-08	7.06694	2.10805	15	94033658	94034177		1					0
ENSG00000242169	AC093789.1	NA	17.8613	4.15746	1.68006	2.6698e-06	5.57352	2.10306	4	188349376	188350024		1					0
ENSG00000224993	RPL29P12	ribosomal protein L29 pseudogene 12	26.4933	6.17164	1.82614	5.01482e-09	8.29974	2.1019	5	43666766	43667232	1						0
ENSG00000244705	AC020658.1	NA	13.4315	3.13878	1.49695	0.000108094	3.9662	2.09735	15	40312352	40313289		1					0
ENSG00000253993	AC104027.1	NA	28.9663	6.79001	1.78662	1.25032e-08	7.90298	2.09289	8	33226848	33227147		1					0
ENSG00000268282	AC010328.2	NA	20.4198	4.79883	1.72856	5.7544e-07	6.24	2.08921	19	53004040	53005150		1					0
ENSG00000226608	FTLP3	ferritin light chain pseudogene 3	362.243	85.5064	2.03945	3.54703e-75	74.4501	2.08285	20	4023917	4024444	1						0
ENSG00000101546 #or# ENSG00000267127 /// ENSG00000261126 #or# ENSG00000267127 /// ENSG00000267127	AC090360.1	ribosome binding factor A #or# NA /// NA /// RBFA downstream neighbor (non-protein coding) #or# NA	13.9765	3.31122	1.5663	4.51311e-05	4.34552	2.07756	18	80095288	80095457		1					0
ENSG00000118939 #or# ENSG00000261553 /// ENSG00000136153 #or# ENSG00000261553	AL137782.1	LIM domain 7 #or# NA /// ubiquitin C-terminal hydrolase L3 #or# NA	128.826	30.7629	1.98463	8.32985e-29	28.0794	2.06616	13	75623271	75623320		1					0
ENSG00000235174	RPL39P3	ribosomal protein L39 pseudogene 3	14720.6	3515.64	1.99548	1.74204e-33	32.7589	2.06597	6	73373108	73373263	1						0
ENSG00000258741	H2AFVP1	H2A histone family member V pseudogene 1	49.0557	11.7555	1.87699	1.33791e-13	12.8736	2.06108	15	92733823	92734195	1						0
ENSG00000213453	FTH1P3	ferritin heavy chain 1 pseudogene 3	67.3941	16.2596	1.87959	1.39629e-17	16.855	2.05133	2	27392784	27393367	1						0
ENSG00000213361	AC004884.1	NA	1050.26	254.439	2.01526	1.05141e-96	95.9782	2.04536	7	105244652	105244970		1					0
ENSG00000215905	AL590609.1	NA	31.3586	7.60648	1.83713	1.0073e-09	8.99684	2.04356	1	24007881	24007965		1					0
ENSG00000253785	AC008429.2	NA	92.5413	22.4827	1.91758	1.07768e-24	23.9675	2.04128	5	172975511	172976374		1					0
ENSG00000235828	RPL36AP26	ribosomal protein L36a pseudogene 26	459.58	112.229	1.97272	6.45446e-62	61.1901	2.03387	7	15701435	15701752	1						0
ENSG00000272055	RNU6-6P	RNA, U6 small nuclear 6, pseudogene	25.4974	6.22747	1.45767	0.000257305	3.58955	2.03363	10	13217269	13217375	1						0
ENSG00000242364	AC108725.1	NA	42.0827	10.2785	1.82792	5.98435e-12	11.223	2.03359	3	73648399	73648807		1					0
ENSG00000198695	MT-ND6	mitochondrially encoded NADH:ubiquinone oxidoreductase core subunit 6	2994.74	731.637	1.85997	1.56648e-13	12.8051	2.03323	0	14149	14151						1	0
ENSG00000213820	RPL13P2	ribosomal protein L13 pseudogene 2	21.0261	5.19733	1.68052	1.52605e-07	6.81643	2.01634	20	46099518	46100176	1						0
ENSG00000279123	AC027281.2	NA	12.6898	3.14012	1.31633	0.00285097	2.54501	2.01478	16	70778433	70779145		1					0
ENSG00000251470	ASNSP4	asparagine synthetase pseudogene 4	12.672	3.13658	1.50152	0.000153683	3.81337	2.01438	8	46698479	46698688	1						0
ENSG00000233328	PFN1P1	profilin 1 pseudogene 1	468.227	116.102	1.90712	6.82606e-24	23.1658	2.01181	1	171670517	171670939	1						0
ENSG00000143226	FCGR2A	Fc fragment of IgG receptor IIa	15.4081	3.82939	1.42266	0.000493903	3.30636	2.0085	1	161522795	161523099							1
ENSG00000230592	RPSAP8	ribosomal protein SA pseudogene 8	73.831	18.3784	1.88829	3.61746e-21	20.4416	2.00621	0	100155885	100156773	1						0
ENSG00000182916	TCEAL7	transcription elongation factor A like 7	5.16948	21.0075	-1.57576	5.57902e-06	5.25344	-2.02281	0	103331707	103332088							1
ENSG00000188818	ZDHHC11	zinc finger DHHC-type containing 11	2.03981	10.3938	-1.38868	0.000486149	3.31323	-2.34922	5	847708	847780							1
ENSG00000240291	AL450384.2	NA	3.93077	20.7189	-1.9351	1.79733e-07	6.74537	-2.39806	10	18541586	18542177		1					0
ENSG00000204389	HSPA1A	heat shock protein family A (Hsp70) member 1A	5.02063	27.5314	-1.6316	1.41564e-08	7.84905	-2.45514	6	31817683	31817946							1
ENSG00000255836	AC131206.1	NA	2.40525	14.3872	-1.66892	1.99286e-05	4.70052	-2.58053	12	7438780	7439990		1					0
ENSG00000166592	RRAD	RRAD, Ras related glycolysis inhibitor and calcium channel regulator	1.70058	10.8725	-1.19904	0.000870905	3.06003	-2.67658	16	66921832	66921990							1
ENSG00000132718	SYT11	synaptotagmin 11	1.35692	10.0192	-1.20186	0.00652231	2.1856	-2.88435	1	155881509	155885199							1
ENSG00000176840	MIR7-3HG	MIR7-3 host gene	2.0507	17.1185	-1.26327	0.00133552	2.87435	-3.06137	19	4772132	4772514				1			0
ENSG00000240771	ARHGEF25	Rho guanine nucleotide exchange factor 25	7.23993	78.6356	-3.01136	9.90481e-27	26.0042	-3.44114	12	57619311	57619379							1
ENSG00000225217	HSPA7	heat shock protein family A (Hsp70) member 7	0.69378	12.2174	-2.429	4.59759e-08	7.33747	-4.13832	1	161606291	161608217							1
ENSG00000173110	HSPA6	heat shock protein family A (Hsp70) member 6	5.95526	249.707	-4.95166	3.02777e-65	64.5189	-5.38993	1	161526591	161526910							1
