# Supplementary material for: The role of reciprocal fusions in MLL-r acute leukemia: studying the chromosomal translocation t(6;11)
Source: Oncogene. 2021 Aug 5;40(40):5902–12. doi: 10.1038/s41388-021-01983-3 (PMC8497272; doi:10.1038/s41388-021-01983-3)
Supplement: Supplementary file 4 — MACE-Seq MLL-AF6/AF6-MLL [file 41388_2021_1983_MOESM4_ESM.xlsx]

## Sheet: Sheet1
ID	gene symbol	gene name	mean exp	mean mock	log2	pvalue	minus log 10	var-log2	chrom	begin	end	PG	NA	LINC	MIR	SNO	MT	PCG
ENSG00000242265	PEG10	paternally expressed 10	1444.26	1.88478	8.54566	2.23575e-185	184.651	9.58172	7	94668734	94669180							1
ENSG00000136999	NOV	nephroblastoma overexpressed	1856.91	3.07675	8.49401	3.21052e-224	223.493	9.23728	8	119416744	119417120							1
ENSG00000106853	PTGR1	prostaglandin reductase 1	87.2253	0.227401	5.62133	8.10144e-45	44.0914	8.58336	9	111592691	111592982							1
ENSG00000102349	KLF8	Kruppel like factor 8	63.6313	0.171101	5.21105	1.46514e-36	35.8341	8.53874	0	56284329	56284655							1
ENSG00000176887	SOX11	SRY-box 11	108.567	0.398502	5.62965	4.15565e-50	49.3814	8.08978	2	5694048	5701385							1
ENSG00000260001	TGFBR3L	transforming growth factor beta receptor 3 like	45.5	0.171101	4.69143	6.34864e-29	28.1973	8.05488	19	7918917	7919090							1
ENSG00000237632	S100A11P1	S100 calcium binding protein A11 pseudogene 1	41.387	0.171101	4.41414	1.34599e-26	25.871	7.91819	7	103262000	103262311	1						0
ENSG00000204389	HSPA1A	heat shock protein family A (Hsp70) member 1A	6644.22	27.5314	7.76564	0	?	7.91488	6	31817683	31817946							1
ENSG00000183770	FOXL2	forkhead box L2	39.5195	0.171101	4.57391	2.33467e-26	25.6318	7.85157	3	138944224	138945591							1
ENSG00000250584	LINC01511	long intergenic non-protein coding RNA 1511	38.2818	0.171101	4.1331	8.86477e-24	23.0523	7.80567	5	1364114	1364691			1				0
ENSG00000076242	MLH1	mutL homolog 1	72.7158	0.398502	5.2917	9.22266e-39	38.0351	7.51154	3	37050486	37050537							1
ENSG00000116663	FBXO6	F-box protein 6	29.3501	0.171101	3.92811	2.96448e-19	18.5281	7.42237	1	11673852	11674030							1
ENSG00000239602	AC091959.2	NA	56.3836	0.342202	4.82216	2.48278e-32	31.6051	7.36429	5	146138145	146138381		1					0
ENSG00000254251	AC103770.1	NA	26.4331	0.171101	3.96484	3.70454e-19	18.4313	7.27135	8	90806474	90806729		1					0
ENSG00000166415	WDR72	WD repeat domain 72	22.9583	0.171101	3.66295	2.09039e-16	15.6798	7.06802	15	53665692	53665768							1
ENSG00000189369	GSPT2	G1 to S phase transition 2	76.0814	0.574471	5.17018	8.99805e-40	39.0459	7.04917	0	51745514	51746232							1
ENSG00000223638	RFPL4A	ret finger protein like 4A	65.504	0.513303	4.67552	2.65944e-35	34.5752	6.99563	19	55761792	55761800							1
ENSG00000240776	AC079944.1	NA	72.0488	0.569603	4.94641	1.91164e-37	36.7186	6.98287	3	113850237	113850731		1					0
ENSG00000205642	VCX3B	variable charge X-linked 3B	35.9676	0.287235	4.03583	1.35346e-22	21.8686	6.96832	0	8466384	8466469							1
ENSG00000182583	VCX	variable charge X-linked	28.4516	0.227401	3.77202	8.35822e-19	18.0779	6.96713	0	7843088	7843203							1
ENSG00000269466	H3.Y	histone cluster 2, H3c pseudogene	24.0784	0.227401	3.5558	1.38799e-16	15.8576	6.72635	5	17654870	17655127	1						0
ENSG00000026508	CD44	CD44 molecule (Indian blood group)	364.518	3.93846	6.06146	1.59438e-107	106.797	6.53221	11	35229334	35229789							1
ENSG00000230697	SAP18P3	SAP18 pseudogene 3	15.5525	0.171101	3.03437	1.97815e-11	10.7037	6.50616	3	20007852	20008247	1						0
ENSG00000224294	PINCR	p53-induced noncoding RNA	56.1902	0.625903	4.73602	4.0759e-31	30.3898	6.48823	0	43225030	43226598							1
ENSG00000124107	SLPI	secretory leukocyte peptidase inhibitor	14.7676	0.171101	2.92897	9.37574e-11	10.028	6.43145	20	45252239	45252414							1
ENSG00000142319	SLC6A3	solute carrier family 6 member 3	19.2149	0.227401	3.16894	4.55665e-13	12.3414	6.40084	5	1414741	1414815							1
ENSG00000241281	AC010683.1	NA	38.1329	0.454803	4.1141	2.15229e-23	22.6671	6.38965	4	147425974	147426351		1					0
ENSG00000041982	TNC	tenascin C	320.037	3.94686	5.90968	3.99846e-99	98.3981	6.34139	9	115091019	115091154							1
ENSG00000125144	MT1G	metallothionein 1G	13.5705	0.171101	2.7405	1.37008e-09	8.86325	6.30948	16	56666806	56667198							1
ENSG00000197124	ZNF682	zinc finger protein 682	31.5142	0.398502	3.91543	7.07081e-20	19.1505	6.30527	19	20030717	20030882							1
ENSG00000229292	RFPL4AL1	ret finger protein like 4A like 1	45.3179	0.574471	4.31736	2.43389e-26	25.6137	6.3017	19	55771796	55771804							1
ENSG00000278318	ZNF229	zinc finger protein 229	13.3467	0.171101	2.80965	6.19241e-10	9.20814	6.28549	19	44442572	44442621							1
ENSG00000011201	ANOS1	anosmin 1	30.5804	0.398502	3.9652	6.81779e-20	19.1664	6.26188	0	8565806	8566212							1
ENSG00000259630	AC104046.1	NA	17.3482	0.227401	3.18404	1.65018e-12	11.7825	6.25341	15	85415228	85415633		1					0
ENSG00000240122	FABP5P11	fatty acid binding protein 5 pseudogene 11	12.2266	0.171101	2.66199	4.80254e-09	8.31853	6.15903	22	16595089	16595485	1						0
ENSG00000220614	AL583834.1	NA	63.219	0.913139	4.63899	2.07327e-33	32.6833	6.11338	6	43328134	43328476		1					0
ENSG00000244468	AC093001.1	NA	11.628	0.171101	2.55339	1.30141e-08	7.88559	6.08661	3	149333504	149333653		1					0
ENSG00000185070	FLRT2	fibronectin leucine rich transmembrane protein 2	108.948	1.60728	3.2105	1.93904e-12	11.7124	6.08288	14	85625879	85626228							1
ENSG00000177504	VCX2	variable charge X-linked 2	19.1044	0.287235	3.17269	3.41369e-13	12.4668	6.05553	0	8169944	8170031							1
ENSG00000167157	PRRX2	paired related homeobox 2	47.5975	0.740704	4.20949	2.07797e-25	24.6824	6.00584	9	129722353	129722674							1
ENSG00000167555	ZNF528	zinc finger protein 528	14.0941	0.227401	2.86583	2.6956e-10	9.56935	5.95371	19	52413604	52418412							1
ENSG00000217776	AL138827.1	NA	10.3943	0.171101	2.45382	4.51216e-08	7.34562	5.92481	6	87070156	87070461		1					0
ENSG00000130844	ZNF331	zinc finger protein 331	118.142	2.10511	4.98692	4.27074e-50	49.3695	5.81048	19	53569304	53569376							1
ENSG00000130528	HRC	histidine rich calcium binding protein	12.6741	0.227401	2.6521	4.66884e-09	8.33079	5.8005	19	49151955	49152378							1
ENSG00000213270	RPL6P25	ribosomal protein L6 pseudogene 25	256.994	4.68403	5.38236	2.64992e-87	86.5768	5.77784	12	83151331	83152190	1						0
ENSG00000270230	MTND6P22	mitochondrially encoded NADH:ubiquinone oxidoreductase core subunit 6 pseudogene 22	109.165	1.99738	4.81081	1.23812e-47	46.9072	5.77226	5	100046450	100046970	1						0
ENSG00000217824	SNRPEP6	small nuclear ribonucleoprotein polypeptide E pseudogene 6	42.8079	0.801872	4.08621	1.40598e-24	23.852	5.73836	6	148567378	148567654	1						0
ENSG00000186019	AC021092.1	NA	57.6121	1.14407	4.40012	2.58073e-30	29.5883	5.65412	19	44111951	44112239		1					0
ENSG00000115009	CCL20	C-C motif chemokine ligand 20	33.6878	0.685738	3.69979	9.33651e-21	20.0298	5.61843	2	227817062	227817463							1
ENSG00000223739	AC007389.2	NA	50.2886	1.02794	4.20985	6.53829e-27	26.1845	5.6124	2	65511771	65512076		1					0
ENSG00000248648	AC113410.1	NA	33.0112	0.685738	3.84984	1.02685e-19	18.9885	5.58916	5	133003119	133003365		1					0
ENSG00000254423	AC087203.1	NA	21.8725	0.458336	3.20814	9.68892e-14	13.0137	5.57657	8	12374366	12375546		1					0
ENSG00000232333	RPS27AP2	ribosomal protein S27a pseudogene 2	89.7261	1.88611	4.72007	5.12563e-41	40.2903	5.57204	20	17516843	17517307	1						0
ENSG00000241877	AC095041.1	NA	35.1848	0.745572	3.87698	9.75465e-21	20.0108	5.56046	4	178286695	178287285		1					0
ENSG00000047644	WWC3	WWC family member 3	37.3541	0.800538	3.88007	4.8417e-21	20.315	5.54415	0	10016396	10016862							1
ENSG00000144188	TRIM43CP	tripartite motif containing 43C, pseudogene	12.823	0.287235	2.6454	4.79291e-09	8.3194	5.48036	2	97025981	97026458	1						0
ENSG00000130222	GADD45G	growth arrest and DNA damage inducible gamma	221.15	4.96506	5.03829	6.68043e-78	77.1752	5.47707	9	89605969	89606098							1
ENSG00000215002	RPL23AP59	ribosomal protein L23a pseudogene 59	86.0201	1.94595	4.64736	1.49668e-38	37.8249	5.46613	10	106551040	106551121	1						0
ENSG00000235315	RPL23AP69	ribosomal protein L23a pseudogene 69	449.812	10.4004	5.1808	7.25443e-136	135.139	5.43461	13	25206049	25206506	1						0
ENSG00000130958 /// ENSG00000130958 #or# ENSG00000285269	SLC35D2	solute carrier family 35 member D2 #or# NA /// solute carrier family 35 member D2	37.0524	0.856838	3.91745	2.49633e-21	20.6027	5.4344	9	96351107	96351171							1
ENSG00000224646	AC007387.1	NA	39.0344	0.911805	3.83345	1.04014e-21	20.9829	5.41988	2	74754670	74754819		1					0
ENSG00000227437	RPS8P4	ribosomal protein S8 pseudogene 4	126.895	2.96902	4.77428	1.91041e-52	51.7189	5.4175	10	119638456	119639082	1						0
ENSG00000243844	RPL17P33	ribosomal protein L17 pseudogene 33	43.6284	1.02794	3.95581	1.79777e-23	22.7453	5.40744	8	29632091	29632644	1						0
ENSG00000231181	AL954705.1	NA	149.107	3.53509	4.81446	4.48768e-57	56.348	5.39846	1	9576427	9576985		1					0
ENSG00000099337	KCNK6	potassium two pore domain channel subfamily K member 6	11.7373	0.287235	2.51369	3.31726e-08	7.47922	5.35272	19	38325043	38325489							1
ENSG00000259583	AC015712.2	NA	11.3646	0.287235	2.57692	1.14458e-08	7.94135	5.30617	15	100915657	100915980		1					0
ENSG00000196589	MBD3L2B	methyl-CpG binding domain protein 3 like 2B	38.0215	0.971639	3.59858	5.89957e-22	21.2292	5.29025	19	7018971	7019076							1
ENSG00000205922	ONECUT3	one cut homeobox 3	15.5151	0.398502	2.76788	6.22494e-10	9.20587	5.28294	19	1775446	1780988							1
ENSG00000210100	MT-TI	mitochondrially encoded tRNA isoleucine	95.5511	2.45925	4.37857	4.1027e-37	36.3869	5.27998	0	4263	4331						1	0
ENSG00000178297	TMPRSS9	transmembrane serine protease 9	13.1208	0.342202	2.53031	2.45233e-08	7.61042	5.26086	19	2418002	2418026							1
ENSG00000237247	MBD3L5	methyl-CpG binding domain protein 3 like 5	10.8806	0.287235	2.46376	4.18913e-08	7.37788	5.24337	19	7032895	7033011							1
ENSG00000269228	RPS27AP19	ribosomal protein S27a pseudogene 19	382.128	10.2737	4.94685	2.27798e-122	121.642	5.21704	19	7666254	7666476	1						0
ENSG00000271811	Z97200.1	NA	14.8041	0.398502	2.78566	8.30199e-10	9.08082	5.21527	1	170667381	170669425		1					0
ENSG00000210107	MT-TQ	mitochondrially encoded tRNA glutamine	57.0104	1.53771	1.71472	0.000151863	3.81855	5.21237	0	4329	4400						1	0
ENSG00000172969	FRG2C	FSHD region gene 2 family member C	46.4724	1.25534	3.82085	4.98272e-25	24.3025	5.21022	3	75666042	75667220							1
ENSG00000188536	HBA2	hemoglobin subunit alpha 2	28.564	0.797004	3.44819	9.03047e-17	16.0443	5.16347	16	173125	173463							1
ENSG00000204363	SPANXN5	SPANX family member N5	22.3919	0.625903	3.12328	1.5285e-13	12.8157	5.16089	0	52796144	52796487							1
ENSG00000237330	RNF223	ring finger protein 223	10.0926	0.287235	2.25258	7.5636e-07	6.12127	5.13492	1	1070966	1071816							1
ENSG00000100867	DHRS2	dehydrogenase/reductase 2	682.109	19.5012	5.05579	2.3757e-211	210.624	5.12837	14	23643045	23645639							1
ENSG00000144015	TRIM43	tripartite motif containing 43	17.9459	0.514637	2.94212	4.98026e-12	11.3027	5.12395	2	95599574	95599778							1
ENSG00000214593	AL354710.1	NA	45.3511	1.31164	3.94859	3.61657e-24	23.4417	5.11169	9	125263845	125264090		1					0
ENSG00000236887	AL357055.2	NA	255.416	7.47841	4.80415	2.65453e-88	87.576	5.09397	1	113198825	113199258		1					0
ENSG00000236574	AC092634.6	NA	40.8302	1.20037	3.90932	2.93929e-22	21.5318	5.08808	7	63843314	63843505		1					0
ENSG00000215088	RPS5P3	ribosomal protein S5 pseudogene 3	33.0518	0.972973	3.72211	3.29549e-19	18.4821	5.08618	21	33481580	33482195	1						0
ENSG00000213950	RPS10P2	ribosomal protein S10 pseudogene 2	71.4478	2.11351	4.25441	1.50208e-32	31.8233	5.07917	20	14757563	14758056	1						0
ENSG00000230603	AC011753.1	NA	49.1258	1.48761	4.07236	7.1475e-26	25.1458	5.04541	2	109665649	109665742		1					0
ENSG00000104435	STMN2	stathmin 2	45.1295	1.37014	3.90345	4.65304e-23	22.3323	5.04167	8	79664875	79664881							1
ENSG00000258802	AL139317.2	NA	275.054	8.38935	4.75721	1.03977e-96	95.9831	5.03501	14	52798904	52799061		1					0
ENSG00000176049	JAKMIP2	janus kinase and microtubule interacting protein 2	38.9949	1.19551	3.80019	4.78071e-21	20.3205	5.02759	5	147648376	147648474							1
ENSG00000206177 #or# ENSG00000206178 /// ENSG00000206177 /// ENSG00000130656 #or# ENSG00000206177	HBM	hemoglobin subunit zeta #or# hemoglobin subunit mu /// hemoglobin subunit mu #or# hemoglobin subunit zeta pseudogene 1 /// hemoglobin subunit mu	12.9366	0.398502	2.54367	2.31341e-08	7.63575	5.02072	16	166709	166768							1
ENSG00000238149	AC104978.1	NA	85.1299	2.62328	4.37326	1.20384e-37	36.9194	5.02022	11	28287235	28287625		1					0
ENSG00000242276	RPL5P3	ribosomal protein L5 pseudogene 3	20.3037	0.625903	3.06265	1.75138e-12	11.7566	5.01966	15	71063101	71063989	1						0
ENSG00000128422	KRT17	keratin 17	232.816	7.32058	4.71106	4.66293e-86	85.3313	4.99109	17	41622873	41623032							1
ENSG00000231991	ANXA2P2	annexin A2 pseudogene 2	98.1445	3.25005	4.08634	5.03355e-40	39.2981	4.91637	9	33624274	33625293	1						0
ENSG00000237629	UQCRHP2	ubiquinol-cytochrome c reductase hinge protein pseudogene 2	112.35	3.81879	4.33465	7.72826e-46	45.1119	4.87874	2	25994794	25995081	1						0
ENSG00000138028	CGREF1	cell growth regulator with EF-hand domain 1	29.7611	1.02927	3.46976	1.6426e-17	16.7845	4.85373	2	27102117	27102591							1
ENSG00000256045	MTRNR2L10	MT-RNR2 like 10	88.2674	3.08028	4.24274	2.04941e-37	36.6884	4.84075	0	55181391	55181919							1
ENSG00000168546	GFRA2	GDNF family receptor alpha 2	19.5531	0.685738	3.06073	3.78415e-12	11.422	4.8336	8	21779550	21779717							1
ENSG00000240912	AC092896.1	NA	22.3962	0.797004	3.03345	1.16241e-12	11.9346	4.81252	3	114103249	114103628		1					0
ENSG00000178252 #or# ENSG00000178467 /// ENSG00000178467	P4HTM	prolyl 4-hydroxylase, transmembrane /// WD repeat domain 6 #or# prolyl 4-hydroxylase, transmembrane	43.9292	1.59888	3.73846	1.06887e-22	21.9711	4.78005	3	49004265	49004595							1
ENSG00000213641	RPL7AP4	ribosomal protein L7a pseudogene 4	26.2842	0.969439	3.27685	2.08026e-15	14.6819	4.7609	14	55543401	55544169	1						0
ENSG00000235211	TMSB10P2	thymosin beta 10 pseudogene 2	136.796	5.07986	4.22745	1.36274e-54	53.8656	4.75109	0	18341216	18341346	1						0
ENSG00000230316	FEZF1-AS1	FEZF1 antisense RNA 1	12.0746	0.458336	2.44414	8.05178e-08	7.09411	4.71943	7	122308487	122308557							1
ENSG00000213592	PPIAP42	peptidylprolyl isomerase A pseudogene 42	106.516	4.11176	4.10713	4.37398e-44	43.3591	4.69517	11	57718044	57718530	1						0
ENSG00000261150	EPPK1	epiplakin 1	138.813	5.36977	4.29102	5.0309e-55	54.2984	4.69214	8	143857737	143857986							1
ENSG00000113657	DPYSL3	dihydropyrimidinase like 3	246.448	9.58926	4.40298	4.00731e-85	84.3971	4.68372	5	147472632	147473344							1
ENSG00000244229	RPL26P35	ribosomal protein L26 pseudogene 35	360.966	14.057	4.55328	6.72963e-120	119.172	4.68251	18	76834429	76834888	1						0
ENSG00000159176	CSRP1	cysteine and glycine rich protein 1	37.5	1.48761	3.66674	4.42566e-20	19.354	4.65582	1	201495599	201496304							1
ENSG00000243538	RPS26P28	ribosomal protein S26 pseudogene 28	391.585	15.5743	4.45668	4.14214e-131	130.383	4.65208	5	16902294	16902641	1						0
ENSG00000214318	ATP5MC1P6	ATP synthase membrane subunit c locus 1 pseudogene 6	12.8626	0.514637	2.5255	1.71475e-08	7.7658	4.64348	18	63496989	63497400	1						0
ENSG00000177551	NHLH2	nescient helix-loop-helix 2	96.5351	3.88349	4.14232	4.46925e-40	39.3498	4.63563	1	115838373	115838380							1
ENSG00000102007	PLP2	proteolipid protein 2	1144.28	46.0641	4.5106	2.06173e-294	293.686	4.63466	0	49174695	49175239							1
ENSG00000213421	AC099670.1	NA	16.9381	0.685738	2.92097	9.37488e-11	10.028	4.62647	1	100586649	100587431		1					0
ENSG00000197921	HES5	hes family bHLH transcription factor 5	105.694	4.28419	4.11662	2.48984e-43	42.6038	4.62472	1	2528745	2529468							1
ENSG00000122304	PRM2	protamine 2	11.1408	0.458336	2.2962	3.07335e-07	6.51239	4.60331	16	11275640	11275829							1
ENSG00000075131 #or# ENSG00000240821	RPL9P25	TIMELESS interacting protein #or# ribosomal protein L9 pseudogene 25	224.4	9.36939	4.33599	3.54391e-73	72.4505	4.58197	15	66379337	66379915	1						0
ENSG00000282879	AC095038.3	NA	73.6843	3.08028	3.84905	1.97632e-31	30.7041	4.58022	7	56736396	56736590		1					0
ENSG00000240409	MTATP8P1	mitochondrially encoded ATP synthase 8 pseudogene 1	30.1317	1.26021	3.39022	4.90834e-16	15.3091	4.57955	1	633535	633741	1						0
ENSG00000167766	ZNF83	zinc finger protein 83	104.118	4.39679	4.12364	5.32621e-42	41.2736	4.56562	19	52654865	52655687							1
ENSG00000223676	RPL34P26	ribosomal protein L34 pseudogene 26	86.3621	3.71812	3.50232	1.36655e-18	17.8644	4.53775	13	50361410	50361763	1						0
ENSG00000256826	ATP5MFP4	ATP synthase membrane subunit f pseudogene 4	88.609	3.81879	3.96138	7.10307e-37	36.1486	4.53627	17	64491523	64491789	1						0
ENSG00000242667	AC087385.2	NA	10.6172	0.458336	2.23916	9.04763e-07	6.04347	4.53385	15	60404463	60404960		1					0
ENSG00000240738	AF279873.2	NA	114.066	4.9748	4.14518	1.00566e-45	44.9975	4.51908	8	33859480	33860223		1					0
ENSG00000239200	RPL22P20	ribosomal protein L22 pseudogene 20	53.244	2.33471	3.56105	2.20836e-25	24.6559	4.5113	14	18692032	18692408	1						0
ENSG00000169583	CLIC3	chloride intracellular channel 3	13.0833	0.574471	2.48132	4.00211e-08	7.39771	4.50935	9	136994734	136994839							1
ENSG00000220522	AL590002.1	NA	10.3194	0.458336	2.21993	1.04293e-06	5.98175	4.49281	6	127416535	127416952		1					0
ENSG00000214915	BX546450.1	NA	80.2704	3.66449	3.92373	4.51686e-38	37.3452	4.45318	0	151515894	151516245		1					0
ENSG00000213791	AC104212.1	NA	37.2762	1.70881	3.35409	2.45187e-18	17.6105	4.44719	8	80300869	80301481		1					0
ENSG00000280012	RPL23AP61	ribosomal protein L23a pseudogene 61	87.7876	4.22923	3.90365	4.10562e-37	36.3866	4.37555	10	46063250	46063715	1						0
ENSG00000092758	COL9A3	collagen type IX alpha 3 chain	334.876	16.1532	4.19807	1.49357e-111	110.826	4.37374	20	62840542	62840658							1
ENSG00000230897	RPS18P12	ribosomal protein S18 pseudogene 12	2564.74	123.875	4.25381	9.30674e-211	210.031	4.37186	17	14705076	14705534	1						0
ENSG00000267652	AC011712.1	NA	10.6172	0.514637	2.28504	4.46731e-07	6.34995	4.3667	18	41789162	41789395		1					0
ENSG00000218582	GAPDHP63	glyceraldehyde 3 phosphate dehydrogenase pseudogene 63	255.944	12.5117	4.16268	6.33641e-86	85.1982	4.35448	6	79953005	79954011	1						0
ENSG00000069812	HES2	hes family bHLH transcription factor 2	59.1828	2.90698	3.67383	3.81623e-26	25.4184	4.34758	1	6418849	6419232							1
ENSG00000256211	AC023512.1	NA	24.374	1.19904	2.91328	3.18021e-13	12.4975	4.34539	12	16989876	16989936		1					0
ENSG00000242041	RPL35AP28	ribosomal protein L35a pseudogene 28	744.345	37.1731	3.87124	9.91094e-45	44.0039	4.32364	12	49863173	49863503	1						0
ENSG00000198346 #or# ENSG00000241434 /// ENSG00000198346	ZNF813	zinc finger protein 813 /// zinc finger protein 813 #or# NA	51.3703	2.58025	2.96103	2.13434e-11	10.6707	4.31535	19	53483750	53483822							1
ENSG00000277297	ATP5F1AP10	ATP synthase F1 subunit alpha pseudogene 10	16.8215	0.853305	2.63178	3.51089e-09	8.45458	4.3011	9	66721158	66722760	1						0
ENSG00000258613	RPL21P7	ribosomal protein L21 pseudogene 7	88.7567	4.50319	3.70024	4.41326e-39	38.3552	4.30084	14	65266638	65267008	1						0
ENSG00000240311	AC004224.1	NA	596.21	30.2558	4.21237	1.9268e-188	187.715	4.30053	16	3496201	3496768		1					0
ENSG00000275110	MIR6087	microRNA 6087	210.078	10.6806	4.02882	2.96843e-73	72.5275	4.29786	0	109054542	109054590				1			0
ENSG00000241418 /// ENSG00000213468 #or# ENSG00000241418	MCRIP2P1	MAPK regulated corepressor interacting protein 2 pseudogene 1 /// firre intergenic repeating RNA element #or# MAPK regulated corepressor interacting protein 2 pseudogene 1	22.2805	1.14407	2.95876	4.7632e-12	11.3221	4.28353	0	131795657	131796167	1						0
ENSG00000243678	NME2	NME/NM23 nucleoside diphosphate kinase 2	52.9027	2.73808	3.4698	2.06688e-25	24.6847	4.2721	17	51171487	51171608							1
ENSG00000124216	SNAI1	snail family transcriptional repressor 1	75.0769	3.88702	3.712	1.6942e-32	31.771	4.27163	20	49988057	49988886							1
ENSG00000187193 #or# ENSG00000259827	AC026461.1	metallothionein 1X #or# NA	220.469	11.4239	4.02438	2.40328e-79	78.6192	4.27044	16	56687578	56687807		1					0
ENSG00000214889	RPS9P1	ribosomal protein S9 pseudogene 1	12.0007	0.625903	2.32586	3.06465e-07	6.51362	4.26103	21	36132450	36133032	1						0
ENSG00000073464	CLCN4	chloride voltage-gated channel 4	21.6841	1.14054	2.93346	6.54192e-12	11.1843	4.24885	0	10185022	10185032							1
ENSG00000261557	EEF1A1P38	eukaryotic translation elongation factor 1 alpha 1 pseudogene 38	90.2537	4.74873	3.19431	4.24865e-15	14.3717	4.24837	16	27133483	27134338	1						0
ENSG00000228121	PHBP3	prohibitin pseudogene 3	32.3814	1.71014	3.24678	1.29589e-15	14.8874	4.24297	1	58999676	59000494	1						0
ENSG00000143217	NECTIN4	nectin cell adhesion molecule 4	112.019	5.9323	3.85313	5.4864e-44	43.2607	4.23901	1	161072140	161072885							1
ENSG00000240972	MIF	macrophage migration inhibitory factor	1723.49	91.3181	4.17138	0	?	4.23829	22	23895040	23895227							1
ENSG00000233707	RPL22P11	ribosomal protein L22 pseudogene 11	23.5547	1.25534	3.01449	1.74874e-12	11.7573	4.22986	2	109737139	109737523	1						0
ENSG00000225899	FRG2B	FSHD region gene 2 family member B	48.751	2.62328	3.3938	9.98615e-24	23.0006	4.21599	10	133626743	133626795							1
ENSG00000235044	PPIAP3	peptidylprolyl isomerase A pseudogene 3	66.5947	3.59492	3.5427	1.43012e-26	25.8446	4.21138	20	37530039	37530543	1						0
ENSG00000249799	SNRPCP13	small nuclear ribonucleoprotein polypeptide C pseudogene 13	17.9063	0.968105	2.61816	1.09173e-09	8.96189	4.20916	4	9583942	9584131	1						0
ENSG00000184343 #or# ENSG00000198753 /// ENSG00000198753	PLXNB3	SRSF protein kinase 3 #or# plexin B3 /// plexin B3	104.573	5.6592	3.78335	9.36675e-43	42.0284	4.20776	0	153778935	153779340							1
ENSG00000169059	VCX3A	variable charge X-linked 3A	17.9459	0.972973	2.72358	3.06543e-10	9.51351	4.20511	0	6534498	6534643							1
ENSG00000205085	FAM71F2	family with sequence similarity 71 member F2	12.5992	0.685738	2.41429	1.06046e-07	6.97451	4.19954	7	128686561	128686875							1
ENSG00000173163 #or# ENSG00000242735	RPSAP26	copper metabolism domain containing 1 #or# ribosomal protein SA pseudogene 26	146.11	8.05155	3.86512	2.74392e-58	57.5616	4.18164	2	62146413	62147153	1						0
ENSG00000239393	AC146507.1	NA	12.3724	0.684404	1.31522	0.00108027	2.96647	4.17613	5	177346073	177346426		1					0
ENSG00000149781	FERMT3	fermitin family member 3	24.5603	1.36794	3.00114	1.92803e-12	11.7149	4.16625	11	64223048	64223120							1
ENSG00000230522	MBD3L2	methyl-CpG binding domain protein 3 like 2	21.5726	1.20391	2.84579	2.28145e-12	11.6418	4.16341	19	7051623	7051735							1
ENSG00000225483	RPL22P4	ribosomal protein L22 pseudogene 4	74.2515	4.15746	3.5557	4.61731e-32	31.3356	4.15865	1	206160887	206161276	1						0
ENSG00000279337	AC127024.7	NA	21.3458	1.19904	2.76806	6.10984e-11	10.214	4.154	17	30724982	30725181		1					0
ENSG00000251258	RFPL4B	ret finger protein like 4B	17.2347	0.969439	2.59305	1.21343e-09	8.91598	4.15202	6	112350501	112351296							1
ENSG00000234559	RPL22P7	ribosomal protein L22 pseudogene 7	63.5582	3.60332	3.54898	1.24257e-29	28.9057	4.14068	2	129939848	129940217	1						0
ENSG00000223313	RNU6-516P	RNA, U6 small nuclear 516, pseudogene	20.0028	1.13921	2.70683	3.06935e-10	9.51295	4.1341	15	40529570	40529673	1						0
ENSG00000230614	DYNLL1P7	dynein light chain LC8-type 1 pseudogene 7	13.0115	0.742038	2.46204	5.2569e-08	7.27927	4.13215	7	85381118	85381375	1						0
ENSG00000101353	MROH8	maestro heat like repeat family member 8	152.644	8.73328	3.74376	2.93323e-52	51.5327	4.1275	20	37160135	37160176							1
ENSG00000140557	ST8SIA2	ST8 alpha-N-acetyl-neuraminide alpha-2,8-sialyltransferase 2	10.992	0.629437	2.21583	1.17353e-06	5.93051	4.12624	15	92444636	92445124							1
ENSG00000236972	FABP5P1	fatty acid binding protein 5 pseudogene 1	95.1848	5.4797	3.65758	2.24127e-37	36.6495	4.11856	13	73100575	73100985	1						0
ENSG00000130656	HBZ	hemoglobin subunit zeta	11.8892	0.685738	2.2858	4.41057e-07	6.35551	4.11586	16	154401	154503							1
ENSG00000229965	AL359704.1	NA	226.459	13.0791	3.96287	3.76038e-77	76.4248	4.11392	1	226438564	226439344		1					0
ENSG00000214089	RPL9P21	ribosomal protein L9 pseudogene 21	191.683	11.0831	3.90673	1.5139e-61	60.8199	4.11229	10	44414649	44415153	1						0
ENSG00000229919	ELOCP3	elongin C pseudogene 3	14.8051	0.856838	2.50661	2.48708e-08	7.60431	4.11092	10	10174230	10174577	1						0
ENSG00000213522	RAC1P5	Rac family small GTPase 1 pseudogene 5	10.8035	0.625903	2.14299	2.61598e-06	5.58237	4.10942	4	107203349	107203924	1						0
ENSG00000229022	AL365366.1	NA	62.3236	3.65256	3.52909	5.57311e-27	26.2539	4.0928	1	241831935	241832787		1					0
ENSG00000224427	AP000281.1	NA	68.8714	4.05813	3.62015	1.58685e-28	27.7995	4.08502	21	32841496	32841811		1					0
ENSG00000210112 /// ENSG00000198763 #or# ENSG00000210112	MT-TM	mitochondrially encoded tRNA methionine /// mitochondrially encoded NADH:ubiquinone oxidoreductase core subunit 2 #or# mitochondrially encoded tRNA methionine	285.69	16.8509	3.24377	1.29463e-18	17.8879	4.08356	0	4402	4469						1	0
ENSG00000238085	AL590682.1	NA	478.668	28.2629	3.9774	7.19944e-148	147.143	4.08204	1	240998451	240998794		1					0
ENSG00000236081	ELFN1-AS1	ELFN1 antisense RNA 1	14.3544	0.853305	2.37433	1.50086e-07	6.82366	4.07229	7	1738983	1739535							1
ENSG00000227514	AC107890.1	NA	30.4325	1.82628	3.03935	3.06323e-15	14.5138	4.05863	8	113377065	113377227		1					0
ENSG00000138083	SIX3	SIX homeobox 3	88.3843	5.31967	3.71775	1.02418e-32	31.9896	4.05438	2	44944761	44946077							1
ENSG00000217130	AL139100.1	NA	288.327	17.4613	3.84772	3.7666e-101	100.424	4.04547	6	34744176	34744673		1					0
ENSG00000214917	AC011825.1	NA	112.602	6.84411	3.28874	3.76075e-19	18.4247	4.04023	18	32075885	32076272		1					0
ENSG00000268993	RPL22P6	ribosomal protein L22 pseudogene 6	77.8387	4.73766	3.49067	2.99767e-33	32.5232	4.03824	1	121142051	121142438	1						0
ENSG00000234496	MRPS21P1	mitochondrial ribosomal protein S21 pseudogene 1	10.282	0.625903	2.12159	3.24144e-06	5.48926	4.03803	1	65092392	65092614	1						0
ENSG00000118058	KMT2A	lysine methyltransferase 2A	5184.73	317.779	3.90699	5.31242e-138	137.275	4.02817	11	118521897	118522409							1
ENSG00000228623 /// ENSG00000228623 #or# ENSG00000285447	ZNF883	zinc finger protein 883 /// zinc finger protein 883 #or# zinc finger protein 883	39.1041	2.40428	3.27884	1.18186e-17	16.9274	4.02364	9	112997120	112999138							1
ENSG00000226624	AC005099.1	NA	17.2337	1.08911	2.6529	2.69414e-09	8.56958	3.98402	7	105819492	105820101		1					0
ENSG00000169429	CXCL8	C-X-C motif chemokine ligand 8	20.7877	1.31651	2.77806	1.48501e-11	10.8283	3.98094	4	73741542	73741986							1
ENSG00000214914	RPL23AP3	ribosomal protein L23a pseudogene 3	67.409	4.28773	3.46884	1.53116e-27	26.815	3.97466	21	36016079	36016546	1						0
ENSG00000205097	FRG2	FSHD region gene 2	52.9027	3.37239	3.35401	5.67116e-25	24.2463	3.9715	4	190024367	190025560							1
ENSG00000283016	AL139353.3	NA	23.1424	1.48274	2.72107	7.91912e-13	12.1013	3.9642	14	31320224	31320634		1					0
ENSG00000163286	ALPG	alkaline phosphatase, germ cell	139.453	8.93626	3.29995	5.29022e-21	20.2765	3.96396	2	232409873	232410714							1
ENSG00000242209	AC006445.1	NA	250.185	16.049	3.78315	3.52894e-82	81.4524	3.96244	4	13647697	13647779		1					0
ENSG00000204390	HSPA1L	heat shock protein family A (Hsp70) member 1 like	15.031	0.971639	2.43461	5.07796e-08	7.29431	3.95138	6	31809619	31810046							1
ENSG00000010327	STAB1	stabilin 1	17.4597	1.13921	2.51664	4.40143e-09	8.35641	3.93793	3	52524357	52524495							1
ENSG00000237406	NDUFA9P1	NADH:ubiquinone oxidoreductase subunit A9 pseudogene 1	23.5538	1.53904	2.82534	5.73221e-12	11.2417	3.93585	22	35897270	35898404	1						0
ENSG00000213312	RPL7AP34	ribosomal protein L7a pseudogene 34	175.564	11.4824	3.69649	2.02168e-62	61.6943	3.9345	6	63548708	63549508	1						0
ENSG00000239600	AP000797.1	NA	19.1774	1.25534	2.59801	9.85422e-10	9.00638	3.93326	11	115951105	115951491		1					0
ENSG00000104722	NEFM	neurofilament medium	7718.99	506.013	3.91281	0	?	3.93116	8	24918607	24919098							1
ENSG00000213542	AC007000.1	NA	106.183	6.96731	3.61166	5.30979e-40	39.2749	3.92981	7	77115399	77116192		1					0
ENSG00000136826	KLF4	Kruppel like factor 4	313.15	20.6856	3.83799	3.85247e-102	101.414	3.92016	9	107489173	107489563							1
ENSG00000178522	AMBN	ameloblastin	164.172	10.8495	3.69556	1.68813e-59	58.7726	3.91951	4	70606731	70606879							1
ENSG00000197647 /// ENSG00000197647 #or# ENSG00000257355	ZNF433	zinc finger protein 433 #or# NA /// zinc finger protein 433	19.8935	1.31517	2.6818	3.01038e-10	9.52138	3.91897	19	12022059	12022189							1
ENSG00000225176	ATP5MGP4	ATP synthase membrane subunit g pseudogene 4	59.5932	3.99963	3.44734	3.23382e-25	24.4903	3.89721	4	148703526	148703832	1						0
ENSG00000198910	L1CAM	L1 cell adhesion molecule	75.2187	5.08606	3.45104	1.479e-28	27.83	3.88647	0	153883864	153884506							1
ENSG00000232830	AC110994.1	NA	11.7799	0.801872	2.26012	6.37201e-07	6.19572	3.87682	3	101414228	101414633		1					0
ENSG00000224282	AC010469.1	NA	10.0582	0.685738	2.10438	3.92442e-06	5.40622	3.87457	5	31822561	31823136		1					0
ENSG00000223741	PSMD4P1	proteasome 26S subunit, non-ATPase 4 pseudogene 1	20.1121	1.37148	2.70425	4.18377e-10	9.37843	3.87427	21	36485983	36486971	1						0
ENSG00000210191 /// ENSG00000198786 #or# ENSG00000210191 /// ENSG00000210184 #or# ENSG00000210191	MT-TL2	mitochondrially encoded NADH:ubiquinone oxidoreductase core subunit 5 #or# mitochondrially encoded tRNA leucine 2 (CUN) /// mitochondrially encoded tRNA serine 2 (AGU/C) #or# mitochondrially encoded tRNA leucine 2 (CUN) /// mitochondrially encoded tRNA leucine 2 (CUN)	23.4433	1.59888	2.81695	1.6504e-11	10.7824	3.87404	0	12266	12336						1	0
ENSG00000184502	GAST	gastrin	10.0186	0.684404	1.98966	6.03305e-06	5.21946	3.87169	17	41715873	41715969							1
ENSG00000223861	AL365436.1	NA	39.2582	2.68798	3.22849	6.54163e-18	17.1843	3.8684	1	151557446	151557940		1					0
ENSG00000115541 #or# ENSG00000270757 /// ENSG00000115540 #or# ENSG00000270757	HSPE1-MOB4	heat shock protein family E (Hsp10) member 1 #or# HSPE1-MOB4 readthrough /// MOB family member 4, phocein #or# HSPE1-MOB4 readthrough	591.329	40.5911	3.79462	1.04692e-170	169.98	3.86472	2	197550647	197550726							1
ENSG00000233278	RPS26P2	ribosomal protein S26 pseudogene 2	51.1818	3.53642	3.28666	1.56485e-21	20.8055	3.85527	9	30831878	30832225	1						0
ENSG00000170540 #or# ENSG00000260342 /// ENSG00000134419 #or# ENSG00000260342	AC138811.2	ribosomal protein S15a #or# NA /// ADP ribosylation factor like GTPase 6 interacting protein 1 #or# NA	3751.32	260.076	3.7314	3.81895e-129	128.418	3.85039	16	18801467	18801519		1					0
ENSG00000227440	ATP5MC1P4	ATP synthase membrane subunit c locus 1 pseudogene 4	45.9488	3.20129	3.24006	6.2108e-21	20.2069	3.8433	3	172828736	172829176	1						0
ENSG00000144010	TRIM43B	tripartite motif containing 43B	10.6921	0.745572	2.13751	1.90179e-06	5.72084	3.84205	2	95477164	95477166							1
ENSG00000235354	RPS29P16	ribosomal protein S29 pseudogene 16	5684.39	396.804	3.81067	0	?	3.84051	7	103348601	103348771	1						0
ENSG00000224820	BTF3P4	basic transcription factor 3 pseudogene 4	125.251	8.83882	3.47851	2.54958e-47	46.5935	3.82483	9	72107818	72108312	1						0
ENSG00000197261	C6orf141	chromosome 6 open reading frame 141	20.1892	1.42644	2.61936	2.93452e-10	9.53246	3.82309	6	49554877	49555060							1
ENSG00000219451	RPL23P8	ribosomal protein L23 pseudogene 8	889.59	63.2088	3.79119	4.53601e-246	245.343	3.81494	7	20827326	20827753	1						0
ENSG00000236285	NPM1P8	nucleophosmin 1 pseudogene 8	11.1814	0.797004	2.14947	1.50569e-06	5.82226	3.81037	0	32205902	32206738	1						0
ENSG00000233873	RPL7P44	ribosomal protein L7 pseudogene 44	162.604	11.5964	3.62306	9.65354e-52	51.0153	3.80962	13	76981175	76981916	1						0
ENSG00000237433	RPSAP11	ribosomal protein SA pseudogene 11	24.044	1.71854	2.84987	7.76336e-12	11.11	3.80642	3	32190747	32191627	1						0
ENSG00000110092	CCND1	cyclin D1	513.292	36.7666	3.70341	2.5876e-150	149.587	3.80332	11	69651118	69651407							1
ENSG00000257569	GSTP1P1	glutathione S-transferase pi 1 pseudogene 1	52.4904	3.76382	3.22699	7.68625e-22	21.1143	3.80178	12	55900300	55900618	1						0
ENSG00000268074	RPL22P5	ribosomal protein L22 pseudogene 5	50.9225	3.65609	3.24179	7.10708e-23	22.1483	3.79993	1	143929994	143930382	1						0
ENSG00000225487	AL390119.1	NA	529.467	38.0649	3.66595	2.88199e-133	132.54	3.79801	1	164921318	164921629		1					0
ENSG00000215457	RPS8P3	ribosomal protein S8 pseudogene 3	14.2461	1.02441	2.36919	1.07124e-07	6.97011	3.79771	18	51845007	51845628	1						0
ENSG00000133101	CCNA1	cyclin A1	42.8423	3.08295	3.14906	2.62875e-18	17.5803	3.79665	13	36442666	36442870							1
ENSG00000230592	RPSAP8	ribosomal protein SA pseudogene 8	254.894	18.3784	3.6496	1.47677e-83	82.8307	3.79381	0	100155885	100156773	1						0
ENSG00000233575	AL358934.1	NA	13.4612	0.972973	2.37565	7.87695e-08	7.10364	3.79026	9	1328664	1328987		1					0
ENSG00000198695 #or# ENSG00000210194 /// ENSG00000210194	MT-TE	mitochondrially encoded NADH:ubiquinone oxidoreductase core subunit 6 #or# mitochondrially encoded tRNA glutamic acid /// mitochondrially encoded tRNA glutamic acid	994.698	72.1852	3.16853	1.47862e-21	20.8301	3.78448	0	14674	14742						1	0
ENSG00000241735	FABP5P3	fatty acid binding protein 5 pseudogene 3	12.5618	0.911805	2.1458	2.15248e-06	5.66706	3.78417	7	152442543	152442950	1						0
ENSG00000105373 #or# ENSG00000221803	SNORD23	NOP53 ribosome biogenesis factor #or# small nucleolar RNA, C/D box 23	28.2267	2.05234	2.79569	9.45404e-13	12.0244	3.78171	19	47755853	47755962					1		0
ENSG00000177688	SUMO4	small ubiquitin-like modifier 4	17.2359	1.25534	2.48145	1.27062e-08	7.89598	3.77926	6	149400680	149401292							1
ENSG00000204335	SP5	Sp5 transcription factor	10.1706	0.742038	2.08869	4.69205e-06	5.32864	3.77676	2	170716259	170716488							1
ENSG00000236546	AL033527.2	NA	10.9149	0.797004	2.02532	9.01813e-06	5.04488	3.77557	1	39898636	39899098		1					0
ENSG00000263464	PPIAL4C	peptidylprolyl isomerase A like 4C	68.9798	5.07766	3.26922	1.90323e-29	28.7205	3.76394	1	149584393	149584464							1
ENSG00000223396	RPS10P7	ribosomal protein S10 pseudogene 7	22.5804	1.66224	2.73473	3.63946e-11	10.439	3.76387	1	201520056	201520549	1						0
ENSG00000262902	MTCO1P40	mitochondrially encoded cytochrome c oxidase I pseudogene 40	479.461	35.3198	3.51948	4.77637e-55	54.3209	3.76287	17	53105734	53106358	1						0
ENSG00000230953	AC099677.1	NA	97.3982	7.19118	3.4337	5.45259e-35	34.2634	3.7596	1	52920422	52920596		1					0
ENSG00000213385	AC105052.2	NA	100.943	7.47708	3.44444	2.56048e-37	36.5917	3.75492	7	102755146	102755939		1					0
ENSG00000187017	ESPN	espin	10.6921	0.797004	1.99533	1.16816e-05	4.9325	3.74581	1	6461180	6461367							1
ENSG00000261588	AC093249.4	NA	19.8134	1.48274	2.54851	3.3017e-09	8.48126	3.74014	16	30587662	30587920		1					0
ENSG00000234213	FHP1	fumarate hydratase pseudogene 1	15.1768	1.13921	2.25445	1.25941e-07	6.89983	3.73577	13	42255873	42256575	1						0
ENSG00000258956	COX4I1P1	cytochrome c oxidase subunit 4I1 pseudogene 1	24.8986	1.88124	2.68215	1.75478e-12	11.7558	3.7263	14	61831861	61832369	1						0
ENSG00000225616	AL138785.1	NA	1950.76	148.647	3.56091	4.15044e-92	91.3819	3.71408	1	28982278	28982608		1					0
ENSG00000220583	RPL35P2	ribosomal protein L35 pseudogene 2	3656.76	279.631	3.67281	0	?	3.70897	6	34263311	34263673	1						0
ENSG00000197406	DIO3	iodothyronine deiodinase 3	24.5603	1.88478	2.66907	6.38121e-12	11.1951	3.70386	14	101562412	101563452							1
ENSG00000235332	RPSAP76	ribosomal protein SA pseudogene 76	14.802	1.13921	2.21436	2.97151e-07	6.52702	3.69969	9	125194649	125194913	1						0
ENSG00000146858	ZC3HAV1L	zinc finger CCCH-type containing, antiviral 1 like	12.4108	0.969439	2.12834	2.11388e-06	5.67492	3.6783	7	139025706	139026543							1
ENSG00000105583 #or# ENSG00000269590	AC010422.5	WD repeat domain 83 opposite strand #or# NA	16.0366	1.25534	2.32628	4.2749e-08	7.36907	3.67522	19	12664828	12664985		1					0
ENSG00000272602	ZNF595	zinc finger protein 595	28.3006	2.22965	2.89377	2.84124e-13	12.5465	3.66595	4	60058	60514							1
ENSG00000106536	POU6F2	POU class 6 homeobox 2	14.4689	1.14407	2.35053	1.37412e-07	6.86198	3.66071	7	39493044	39493095							1
ENSG00000150722	PPP1R1C	protein phosphatase 1 regulatory inhibitor subunit 1C	18.6194	1.48274	2.53162	3.69101e-09	8.43285	3.65046	2	182117207	182117917							1
ENSG00000180190	TDRP	testis development related protein	58.5157	4.67563	3.13907	4.49791e-22	21.347	3.64559	8	492630	492744							1
ENSG00000173530	TNFRSF10D	TNF receptor superfamily member 10d	264.666	21.2455	3.52549	2.97169e-88	87.527	3.63895	8	23135588	23137869							1
ENSG00000210135 /// ENSG00000210135 #or# ENSG00000210140 /// ENSG00000210127 #or# ENSG00000210135	MT-TN	mitochondrially encoded tRNA asparagine #or# mitochondrially encoded tRNA cysteine /// mitochondrially encoded tRNA alanine #or# mitochondrially encoded tRNA asparagine /// mitochondrially encoded tRNA asparagine	460.529	37.0675	2.94097	1.07722e-16	15.9677	3.63507	0	5657	5729						1	0
ENSG00000249119	MTND6P4	mitochondrially encoded NADH:ubiquinone oxidoreductase core subunit 6 pseudogene 4	526.139	42.8496	3.25992	1.66747e-33	32.7779	3.61809	5	134924123	134924644	1						0
ENSG00000144158	AL078621.1	NA	54.6576	4.45443	3.16512	2.69027e-21	20.5702	3.61711	2	113657908	113658675		1					0
ENSG00000135346	CGA	glycoprotein hormones, alpha polypeptide	16.0762	1.31031	2.30722	1.34736e-07	6.87052	3.61695	6	87087699	87088207							1
ENSG00000176340 #or# ENSG00000256100	AP000721.1	cytochrome c oxidase subunit 8A #or# NA	451.37	37.0237	3.47048	1.05085e-142	141.978	3.60779	11	63988344	63988346		1					0
ENSG00000234192	RPS26P38	ribosomal protein S26 pseudogene 38	20.9366	1.71854	2.67965	3.02191e-10	9.51972	3.60677	10	87642607	87642954	1						0
ENSG00000226138	AC004801.1	NA	10.3559	0.856838	2.04558	2.22709e-06	5.65226	3.59529	12	48085062	48085421		1					0
ENSG00000213711	PHBP7	prohibitin pseudogene 7	64.5681	5.3671	3.09494	1.9553e-26	25.7088	3.58861	9	85898903	85899716	1						0
ENSG00000178928	TPRX1	tetrapeptide repeat homeobox 1	34.3935	2.85909	2.90078	2.86703e-16	15.5426	3.58851	19	47801480	47801774							1
ENSG00000176840	MIR7-3HG	MIR7-3 host gene	204.498	17.1185	2.90318	7.48088e-16	15.126	3.57846	19	4772132	4772514				1			0
ENSG00000230171	RPL22P18	ribosomal protein L22 pseudogene 18	44.8234	3.76115	2.89625	3.67812e-18	17.4344	3.57501	10	80125941	80126317	1						0
ENSG00000228089	PNKDP1	PNKD pseudogene 1	12.897	1.08424	2.16538	9.49004e-07	6.02273	3.57228	0	131803312	131803741	1						0
ENSG00000218596	AL162578.1	NA	53.496	4.51073	3.12121	1.6168e-20	19.7913	3.568	6	156976815	156977072		1					0
ENSG00000260103	AC012435.1	NA	96.8694	8.23372	3.32003	2.46284e-37	36.6086	3.55642	15	74481025	74481130		1					0
ENSG00000210196	MT-TP	mitochondrially encoded tRNA proline	459.956	39.1646	1.22505			3.55388	0	15956	16023						1	0
ENSG00000223865	HLA-DPB1	major histocompatibility complex, class II, DP beta 1	201.318	17.1944	3.39046	1.63812e-63	62.7857	3.54947	6	33083514	33083890							1
ENSG00000235546	AC087499.4	NA	16.6352	1.42291	2.30344	5.15304e-08	7.28794	3.54732	17	20612667	20614008		1					0
ENSG00000230199	AL603825.1	NA	35.2515	3.01825	2.80031	2.17707e-14	13.6621	3.5459	1	242975005	242975084		1					0
ENSG00000244527	AC022795.1	NA	75.9297	6.51384	3.20235	4.67549e-29	28.3302	3.54308	18	21119182	21119661		1					0
ENSG00000215063	RPL21P2	ribosomal protein L21 pseudogene 2	13.1978	1.14274	2.10471	2.21438e-06	5.65475	3.52973	20	4059633	4060113	1						0
ENSG00000229115	AL390774.1	NA	10.4714	0.913139	1.96521	1.37596e-05	4.86139	3.51947	9	123759719	123759775		1					0
ENSG00000240052	AC108114.1	NA	346.123	30.215	3.44247	6.05241e-108	107.218	3.51795	5	53413855	53414260		1					0
ENSG00000224415	AC007683.1	NA	275.341	24.0372	3.36439	1.49473e-83	82.8254	3.51788	7	103141349	103141939		1					0
ENSG00000261461	UBE2MP1	ubiquitin conjugating enzyme E2 M pseudogene 1	16.3	1.43131	2.35928	1.77176e-08	7.7516	3.50946	16	35169692	35170241	1						0
ENSG00000235993	AC007559.1	NA	24.0357	2.11351	2.58288	5.29201e-10	9.27638	3.50746	2	229701794	229702148		1					0
ENSG00000240003	RPL7P24	ribosomal protein L7 pseudogene 24	94.5905	8.40215	3.23489	3.05878e-34	33.5145	3.49286	5	80501325	80501400	1						0
ENSG00000106366	SERPINE1	serpin family E member 1	35.4043	3.14499	2.84181	5.29266e-17	16.2763	3.4928	7	101137443	101139266							1
ENSG00000241923	RPL14P3	ribosomal protein L14 pseudogene 3	64.1611	5.71417	3.05631	4.44165e-24	23.3525	3.48908	4	140366240	140366861	1						0
ENSG00000234981	AC244034.1	NA	39.711	3.53995	2.96868	1.6433e-15	14.7843	3.48774	1	206528915	206529706		1					0
ENSG00000103196	CRISPLD2	cysteine rich secretory protein LCCL domain containing 2	16.5228	1.47921	2.25996	4.51349e-08	7.34549	3.48156	16	84920397	84920768							1
ENSG00000255363	AP001189.5	NA	92.9041	8.35826	3.29959	5.82381e-39	38.2348	3.47447	11	76628096	76628481		1					0
ENSG00000008517	IL32	interleukin 32	74.1401	6.69468	3.19047	9.10091e-30	29.0409	3.46917	16	3068990	3069411							1
ENSG00000138792	ENPEP	glutamyl aminopeptidase	55.6279	5.02623	3.0246	4.51044e-21	20.3458	3.46826	4	110564797	110565057							1
ENSG00000241334	RPL35AP33	ribosomal protein L35a pseudogene 33	21.4238	1.94108	2.54044	9.9883e-10	9.00051	3.46428	16	68477237	68477570	1						0
ENSG00000169548	ZNF280A	zinc finger protein 280A	15.741	1.43131	2.30865	6.89761e-08	7.1613	3.45912	22	22513736	22514001							1
ENSG00000100285	NEFH	neurofilament heavy	13.0864	1.19551	2.12466	8.06465e-07	6.09341	3.45237	22	29490704	29491390							1
ENSG00000167968	DNASE1L2	deoxyribonuclease 1 like 2	46.7337	4.28553	2.97339	4.88361e-19	18.3113	3.44692	16	2237821	2238000							1
ENSG00000259369	AC009997.1	NA	656.881	60.2664	3.38658	1.62014e-166	165.79	3.44621	15	55746639	55746767		1					0
ENSG00000158486	DNAH3	dynein axonemal heavy chain 3	13.0833	1.20037	2.14659	7.61003e-07	6.11861	3.44617	16	21140208	21140710							1
ENSG00000213730	POLD2P1	DNA polymerase delta 2, accessory subunit pseudogene 1	11.1013	1.02794	1.90429	2.49041e-05	4.60373	3.4329	5	93267429	93268425	1						0
ENSG00000213820	RPL13P2	ribosomal protein L13 pseudogene 2	56.0797	5.19733	2.99557	4.00888e-22	21.397	3.43164	20	46099518	46100176	1						0
ENSG00000213956	AC112187.1	NA	25.1985	2.33605	2.58834	3.64624e-11	10.4382	3.4312	5	50633124	50633602		1					0
ENSG00000076944 #or# ENSG00000268400 /// ENSG00000229833 #or# ENSG00000268400	AC008763.2	syntaxin binding protein 2 #or# NA /// PET100 homolog #or# NA	340.708	31.658	3.2868	2.5046e-89	88.6013	3.4279	19	7642034	7642118		1					0
ENSG00000166446	CDYL2	chromodomain Y like 2	10.4683	0.972973	2.01252	9.98244e-06	5.00076	3.42748	16	80684604	80685129							1
ENSG00000176884	GRIN1	glutamate ionotropic receptor NMDA type subunit 1	30.0224	2.79438	2.70154	1.16739e-12	11.9328	3.42544	9	137168463	137168755							1
ENSG00000157765	SLC34A2	solute carrier family 34 member 2	15.3318	1.42778	2.32176	2.68264e-08	7.57144	3.42469	4	25669647	25669693							1
ENSG00000213970	AC006122.1	NA	208.278	19.4108	3.27389	7.67183e-66	65.1151	3.42358	12	4324372	4324811		1					0
ENSG00000022556 #or# ENSG00000243494 /// ENSG00000243494	AC011476.1	NA /// NLR family pyrin domain containing 2 #or# NA	85.0195	7.94648	3.1948	9.55513e-30	29.0198	3.4194	19	54974355	54974417		1					0
ENSG00000236976	AC091685.2	NA	112.5	10.5671	3.19836	6.095e-40	39.215	3.41227	7	64141538	64142401		1					0
ENSG00000241008	AC044810.1	NA	45.0128	4.22923	2.92648	1.38278e-17	16.8592	3.41187	11	7783697	7784407		1					0
ENSG00000075618	FSCN1	fascin actin-bundling protein 1	2474.83	232.57	3.39217	0	?	3.41159	7	5605272	5606654							1
ENSG00000162722	TRIM58	tripartite motif containing 58	10.282	0.969439	1.96443	1.63631e-05	4.78613	3.40682	1	247876490	247878205							1
ENSG00000225338	RPL23AP18	ribosomal protein L23a pseudogene 18	347.916	32.8047	3.29659	1.31044e-101	100.883	3.40676	1	212309051	212309518	1						0
ENSG00000239323	AL163973.1	NA	186.377	17.588	3.24385	1.46319e-57	56.8347	3.40556	14	31462795	31463371		1					0
ENSG00000182759	MAFA	MAF bZIP transcription factor A	199.192	18.8509	3.26388	8.72113e-65	64.0594	3.40146	8	143428060	143429344							1
ENSG00000243830	AC092865.1	NA	160.465	15.1984	3.24646	4.29817e-54	53.3667	3.40027	12	8460618	8461232		1					0
ENSG00000257243	AC020612.1	NA	30.5835	2.90918	2.63423	2.96711e-13	12.5277	3.39407	12	49595148	49595688		1					0
ENSG00000228477	AL663070.1	NA	930.592	88.7368	3.34829	5.23776e-255	254.281	3.39054	1	39962680	39963404		1					0
ENSG00000227311	AL031985.2	NA	121.806	11.6451	3.13607	3.92449e-40	39.4062	3.38679	1	40333078	40333557		1					0
ENSG00000064300	NGFR	nerve growth factor receptor	58.4719	5.59583	2.9261	1.19915e-22	21.9211	3.38532	17	49513010	49513372							1
ENSG00000105379 #or# ENSG00000269403 /// ENSG00000160318 #or# ENSG00000269403	AC008750.8	electron transfer flavoprotein subunit beta #or# NA /// claudin domain containing 2 #or# NA	33.3848	3.19642	2.69473	1.47281e-14	13.8319	3.38466	19	51350373	51350391		1					0
ENSG00000233080	LINC01399	long intergenic non-protein coding RNA 1399	39.2177	3.76469	2.7089	4.03645e-16	15.394	3.3809	22	35194699	35194942			1				0
ENSG00000214391	TUBAP2	tubulin alpha pseudogene 2	897.869	86.2617	3.33968	9.21731e-241	240.035	3.37971	11	90282560	90284172	1						0
ENSG00000240622	RPL7P15	ribosomal protein L7 pseudogene 15	140.209	13.4727	3.19175	2.61774e-46	45.5821	3.37947	3	124151960	124152516	1						0
ENSG00000225787	LSM3P3	LSM3 homolog, U6 small nuclear RNA and mRNA degradation associated pseudogene 3	93.0551	8.95495	3.04079	3.15114e-33	32.5015	3.37733	2	85102389	85102694	1						0
ENSG00000082175	PGR	progesterone receptor	27.1753	2.63035	2.57742	2.66514e-10	9.57428	3.36897	11	101127050	101127088							1
ENSG00000237952	RPL7AP73	ribosomal protein L7a pseudogene 73	10.0186	0.972973	1.90233	2.99821e-05	4.52314	3.36414	13	22803296	22803648	1						0
ENSG00000184584	TMEM173	transmembrane protein 173	56.3369	5.48943	2.97252	6.40455e-21	20.1935	3.35935	5	139481846	139482302							1
ENSG00000277586	NEFL	neurofilament light	2884.12	281.298	3.34195	0	?	3.35796	8	24955225	24956721							1
ENSG00000241651	AC099340.1	NA	32.1545	3.14145	2.72829	1.24444e-13	12.905	3.35552	4	128069014	128069612		1					0
ENSG00000196757 #or# ENSG00000267179 /// ENSG00000196757	ZNF700	zinc finger protein 700 /// zinc finger protein 700 #or# NA	30.3566	2.96682	2.703	1.35117e-12	11.8693	3.35502	19	11950254	11950773							1
ENSG00000236646	LAMTOR5P1	late endosomal/lysosomal adaptor, MAPK and MTOR activator 5 pseudogene 1	25.1214	2.45571	2.54729	2.97603e-11	10.5264	3.3547	1	62038842	62039111	1						0
ENSG00000275956	AC104446.1	NA	11.7029	1.14407	2.07098	4.06975e-06	5.39043	3.35461	3	52732547	52733867		1					0
ENSG00000210144 /// ENSG00000210140 #or# ENSG00000210144	MT-TY	mitochondrially encoded tRNA cysteine #or# mitochondrially encoded tRNA tyrosine /// mitochondrially encoded tRNA tyrosine	313.698	30.7531	2.62422	1.64564e-12	11.7837	3.35057	0	5826	5891						1	0
ENSG00000210151	MT-TS1	mitochondrially encoded tRNA serine 1 (UCN)	146.116	14.3362	2.55807	8.81663e-11	10.0547	3.34938	0	7446	7514						1	0
ENSG00000100767	PAPLN	papilin, proteoglycan like sulfated glycoprotein	12.7877	1.25534	2.09115	3.40575e-06	5.46779	3.34861	14	73272495	73272933							1
ENSG00000167232	ZNF91	zinc finger protein 91	63.297	6.2204	2.94936	5.46193e-23	22.2627	3.34706	19	23362682	23362725							1
ENSG00000236330	RPL5P9	ribosomal protein L5 pseudogene 9	178.858	17.6066	3.25839	1.44659e-56	55.8397	3.34462	2	110967834	110968719	1						0
ENSG00000243417	AC023424.2	NA	41.1227	4.05326	2.80175	1.06407e-15	14.973	3.34278	4	152551277	152552000		1					0
ENSG00000244538	AC098583.1	NA	299.985	29.6299	3.24607	4.64088e-87	86.3334	3.33976	4	22594196	22594450		1					0
ENSG00000187601	MAGEH1	MAGE family member H1	26.434	2.62061	2.42119	2.81934e-09	8.54985	3.33442	0	55453035	55453566							1
ENSG00000177106	EPS8L2	EPS8 like 2	35.0682	3.47879	2.68991	6.01288e-14	13.2209	3.33351	11	727357	727658							1
ENSG00000131981	LGALS3	galectin 3	125.881	12.5206	3.18799	3.50933e-38	37.4548	3.32969	14	55140275	55140440							1
ENSG00000115266	APC2	APC2, WNT signaling pathway regulator	52.7173	5.24523	2.87082	3.96351e-19	18.4019	3.3292	19	1452800	1453001							1
ENSG00000231821	NPM1P48	nucleophosmin 1 pseudogene 48	21.7599	2.16715	2.36036	4.80219e-09	8.31856	3.3278	2	4514204	4515056	1						0
ENSG00000131096	PYY	peptide YY	11.4395	1.14274	1.94157	7.15196e-06	5.14557	3.32346	17	43952889	43953104							1
ENSG00000136960	ENPP2	ectonucleotide pyrophosphatase/phosphodiesterase 2	21.1604	2.11705	2.47127	1.75274e-09	8.75628	3.32124	8	119616269	119616384							1
ENSG00000231480	SNRPGP13	small nuclear ribonucleoprotein polypeptide G pseudogene 13	13.1208	1.31651	2.01895	8.8157e-06	5.05474	3.31706	21	38502445	38502621	1						0
ENSG00000215464	AP000354.1	NA	255.238	25.835	3.22561	1.00655e-72	71.9972	3.30444	22	24269346	24269675		1					0
ENSG00000228986	AC234781.3	NA	12.8979	1.31517	2.00875	6.9192e-06	5.15994	3.29381	0	155292802	155293432		1					0
ENSG00000269086	AC008555.2	NA	10.0935	1.02927	1.89973	2.9984e-05	4.52311	3.29373	19	34850692	34855304		1					0
ENSG00000261395	HSPE1P5	heat shock protein family E (Hsp10) member 1 pseudogene 5	164.874	16.8411	3.08747	2.13292e-53	52.671	3.2913	16	68686399	68686670	1						0
ENSG00000231812	SNRPCP9	small nuclear ribonucleoprotein polypeptide C pseudogene 9	11.7029	1.19551	1.96652	8.67936e-06	5.06151	3.29117	7	97885868	97886074	1						0
ENSG00000231313	CLIC1P1	chloride intracellular channel 1 pseudogene 1	16.7487	1.71368	2.25586	1.06064e-07	6.97443	3.28888	12	120914400	120915123	1						0
ENSG00000249780	AC093809.1	NA	20.4838	2.11218	2.30737	3.62225e-08	7.44102	3.27768	4	12640298	12640637		1					0
ENSG00000244535	AL049714.1	NA	294.756	30.4939	3.18796	7.79913e-92	91.108	3.27293	11	32758268	32758614		1					0
ENSG00000067057 #or# ENSG00000278419	AL451164.3	phosphofructokinase, platelet #or# NA	34.7309	3.59626	2.68811	3.16145e-14	13.5001	3.27165	10	3144971	3145166		1					0
ENSG00000248690	HAS2-AS1	HAS2 antisense RNA 1	11.5166	1.20391	2.02809	8.00808e-06	5.09647	3.25792	8	121644266	121644693							1
ENSG00000232429	RPL21P131	ribosomal protein L21 pseudogene 131	14.6936	1.53771	2.0707	1.87754e-06	5.72641	3.25634	19	33589206	33589688	1						0
ENSG00000010030	ETV7	ETS variant 7	24.5634	2.57538	2.53726	7.83774e-12	11.1058	3.25365	6	36366195	36366644							1
ENSG00000234819	AL353705.4	NA	48.4087	5.07633	2.64973	2.60476e-15	14.5842	3.25341	9	78219120	78219357		1					0
ENSG00000168079	SCARA5	scavenger receptor class A member 5	65.4322	6.86311	2.92529	1.33397e-21	20.8749	3.25307	8	27904728	27904730							1
ENSG00000225611	LINC02158	long intergenic non-protein coding RNA 2158	20.1152	2.11351	2.36861	3.11162e-09	8.50701	3.25057	3	42773205	42773635			1				0
ENSG00000235264	RPL5P28	ribosomal protein L5 pseudogene 28	145.096	15.2582	3.08742	1.96776e-46	45.706	3.24935	10	133144612	133145304	1						0
ENSG00000152936 #or# ENSG00000241846 /// ENSG00000152936	LMNTD1	lamin tail domain containing 1 /// lamin tail domain containing 1 #or# NA	10.8066	1.13701	1.85716	4.60566e-05	4.33671	3.2486	12	25549498	25549546							1
ENSG00000089820 /// ENSG00000089820 #or# ENSG00000102030	ARHGAP4	Rho GTPase activating protein 4 #or# N(alpha)-acetyltransferase 10, NatA catalytic subunit /// Rho GTPase activating protein 4	92.1587	9.69786	2.89876	4.97717e-31	30.303	3.24838	0	153920739	153920808							1
ENSG00000228781	AL353705.1	NA	10.8035	1.14407	1.90446	2.57874e-05	4.58859	3.23925	9	78180214	78180693		1					0
ENSG00000235643	LINC01647	long intergenic non-protein coding RNA 1647	12.4129	1.31517	2.09003	7.39186e-07	6.13125	3.23851	1	11612790	11613355			1				0
ENSG00000254449	SF3A3P2	splicing factor 3a, subunit 3 pseudogene 2	87.1442	9.25412	2.94606	7.61713e-31	30.1182	3.23524	11	123597946	123599452	1						0
ENSG00000120875	DUSP4	dual specificity phosphatase 4	111.146	11.8167	3.03715	4.99679e-36	35.3013	3.23355	8	29336539	29337025							1
ENSG00000227176	AC092641.1	NA	20.7128	2.22345	2.3141	7.80292e-09	8.10774	3.21966	2	170077224	170077594		1					0
ENSG00000164853	UNCX	UNC homeobox	61.5439	6.61977	2.7473	1.25717e-19	18.9006	3.21676	7	1236978	1237318							1
ENSG00000213370	RANP6	RAN, member RAS oncogene family pseudogene 6	34.9568	3.76602	2.61786	7.37861e-14	13.132	3.21446	4	173633728	173634371	1						0
ENSG00000231362	AC069271.1	NA	13.2727	1.43131	2.10025	2.08552e-06	5.68079	3.21306	3	13052967	13053122		1					0
ENSG00000228053	AL158823.1	NA	51.4452	5.54927	2.86215	9.50258e-20	19.0222	3.21267	9	110024881	110025358		1					0
ENSG00000270694	AC211469.2	NA	17.4222	1.87991	2.17278	1.85741e-07	6.73109	3.21219	7	72722885	72723089		1					0
ENSG00000185839	AL035411.1	NA	70.7694	7.64331	2.81936	8.16174e-24	23.0882	3.21086	1	58630841	58631530		1					0
ENSG00000244585	RPL12P33	ribosomal protein L12 pseudogene 33	169.441	18.4032	3.09128	2.15811e-52	51.6659	3.20275	12	120916745	120917236	1						0
ENSG00000171451	DSEL	dermatan sulfate epimerase like	47.8173	5.19647	2.83709	2.56859e-17	16.5903	3.20193	18	67506582	67510969							1
ENSG00000146707	POMZP3	POM121 and ZP3 fusion	208.695	22.7225	3.09976	1.37982e-64	63.8602	3.1992	7	76626065	76626127							1
ENSG00000236044	FABP5P2	fatty acid binding protein 5 pseudogene 2	208.725	22.7353	3.07795	8.69235e-66	65.0609	3.1986	13	51966742	51967149	1						0
ENSG00000226493	RPL26P27	ribosomal protein L26 pseudogene 27	18.8806	2.06075	2.31374	1.90642e-08	7.71978	3.19567	10	68499532	68499968	1						0
ENSG00000228974	AC006483.1	NA	112.236	12.2653	2.97677	1.09676e-36	35.9599	3.19387	7	5560743	5561055		1					0
ENSG00000240489	SETP14	SET pseudogene 14	15.1424	1.65738	2.13473	1.09072e-06	5.96229	3.19162	3	155987304	155988176	1						0
ENSG00000229161	TCP1P1	t-complex 1 pseudogene 1	254.044	27.8573	3.07893	2.09597e-78	77.6786	3.18895	7	42802369	42802494	1						0
ENSG00000225462	FDPSP1	farnesyl diphosphate synthase pseudogene 1	22.3566	2.45438	2.35442	1.66401e-09	8.77885	3.18727	1	187563061	187564131	1						0
ENSG00000128564	VGF	VGF nerve growth factor inducible	138.229	15.2032	3.04347	4.49923e-46	45.3469	3.18461	7	101162516	101162995							1
ENSG00000228501	RPL15P18	ribosomal protein L15 pseudogene 18	107.897	11.8823	2.98194	1.0671e-36	35.9718	3.18277	13	100150481	100151092	1						0
ENSG00000108551	RASD1	ras related dexamethasone induced 1	35.9664	4.00182	2.61417	9.4525e-14	13.0245	3.16792	17	17494707	17495527							1
ENSG00000125968	ID1	inhibitor of DNA binding 1, HLH protein	291.573	32.4948	3.07905	1.41075e-85	84.8505	3.16558	20	31605838	31606515							1
ENSG00000232818	RPS2P32	ribosomal protein S2 pseudogene 32	53.2348	5.9345	2.74459	5.07021e-18	17.295	3.16517	7	23490473	23491364	1						0
ENSG00000188372	ZP3	zona pellucida glycoprotein 3	183.495	20.5154	3.04443	2.32504e-55	54.6336	3.16096	7	76441842	76442071							1
ENSG00000231066	NPM1P9	nucleophosmin 1 pseudogene 9	10.6942	1.20037	1.92292	2.33003e-05	4.63264	3.15528	0	14834476	14835319	1						0
ENSG00000170961	HAS2	hyaluronan synthase 2	34.4684	3.88436	2.51141	1.2306e-11	10.9099	3.14953	8	121612116	121614108							1
ENSG00000259340	AC110588.1	NA	27.8905	3.14499	2.51447	1.18151e-11	10.9276	3.14865	15	96551381	96551517		1					0
ENSG00000226273	AC079305.2	NA	17.6813	1.99604	2.10193	5.1391e-07	6.28911	3.14701	2	177177695	177178255		1					0
ENSG00000273716	AC092670.1	NA	48.5263	5.4797	2.69685	9.69563e-18	17.0134	3.1466	4	118460224	118460301		1					0
ENSG00000227337	RPL23AP43	ribosomal protein L23a pseudogene 43	631.808	71.3539	3.12358	1.81856e-162	161.74	3.14642	3	32785646	32786116	1						0
ENSG00000115339	GALNT3	polypeptide N-acetylgalactosaminyltransferase 3	38.695	4.39679	2.65354	9.7866e-15	14.0094	3.13762	2	165770701	165770808							1
ENSG00000179131	AC073335.1	NA	133.392	15.1864	2.94608	3.651e-42	41.4376	3.13481	7	66914581	66914943		1					0
ENSG00000175768	TOMM5	translocase of outer mitochondrial membrane 5	181.779	20.7681	2.98892	1.49197e-57	56.8262	3.12974	9	37588642	37588932							1
ENSG00000230006	ANKRD36BP2	ankyrin repeat domain 36B pseudogene 2	10.5058	1.20037	1.8947	3.30737e-05	4.48052	3.12962	2	88805379	88806611	1						0
ENSG00000267589	AC011444.4	NA	10.4683	1.20037	1.8797	3.65545e-05	4.43706	3.12447	19	6073269	6073527		1					0
ENSG00000253173	H2AFZP2	H2A histone family member Z pseudogene 2	31.2944	3.59979	2.5345	1.29989e-12	11.8861	3.11992	8	70103798	70104179	1						0
ENSG00000249987	RPS4XP20	ribosomal protein S4X pseudogene 20	761.802	87.9309	3.06416	8.82952e-178	177.054	3.11497	19	34022656	34023427	1						0
ENSG00000232393	RPL5P6	ribosomal protein L5 pseudogene 6	66.7374	7.70801	2.80374	5.86567e-23	22.2317	3.11407	1	91023919	91024804	1						0
ENSG00000226701	RPL15P14	ribosomal protein L15 pseudogene 14	104.317	12.0596	2.96305	4.65184e-33	32.3324	3.11272	10	72189941	72190576	1						0
ENSG00000198744 /// ENSG00000198744 #or# ENSG00000248527	MTCO3P12	mitochondrially encoded cytochrome c oxidase III pseudogene 12 /// mitochondrially encoded cytochrome c oxidase III pseudogene 12 #or# mitochondrially encoded ATP synthase 6 pseudogene 1	2012.43	232.8	2.86104	8.77453e-31	30.0568	3.11177	1	634376	634922	1						0
ENSG00000236603	RANP1	RAN, member RAS oncogene family pseudogene 1	272.322	31.6163	2.99636	2.20901e-84	83.6558	3.10657	6	30485940	30486590	1						0
ENSG00000267254	AC020928.1	NA	13.1229	1.53904	2.00479	7.28057e-06	5.13783	3.09198	19	36827650	36828115		1					0
ENSG00000243886	AC117440.1	NA	19.853	2.33958	2.26163	1.35649e-08	7.86758	3.08504	3	137535572	137536142		1					0
ENSG00000205579	DYNLL1P1	dynein light chain LC8-type 1 pseudogene 1	74.3264	8.79665	2.71276	1.12189e-23	22.95	3.07885	14	81246295	81246563	1						0
ENSG00000189171 #or# ENSG00000271853	AL162258.1	S100 calcium binding protein A13 #or# NA	202.93	24.0266	2.93305	1.24359e-59	58.9053	3.07828	1	153627508	153627598		1					0
ENSG00000240371	RPS4XP13	ribosomal protein S4X pseudogene 13	2250.7	266.615	3.00601	1.12124e-115	114.95	3.07754	11	57576292	57577080	1						0
ENSG00000213126	AC092642.1	NA	41.7234	4.96153	2.56484	4.63003e-15	14.3344	3.072	2	179814251	179814675		1					0
ENSG00000135317 #or# ENSG00000271793 /// ENSG00000135316 #or# ENSG00000271793	AL589666.1	synaptotagmin binding cytoplasmic RNA interacting protein #or# NA /// sorting nexin 14 #or# NA	120.266	14.3212	2.84975	4.57691e-37	36.3394	3.07	6	85557978	85558060		1					0
ENSG00000128253	RFPL2	ret finger protein like 2	57.0863	6.80814	2.74291	1.60817e-22	21.7937	3.06781	22	32190706	32191352							1
ENSG00000120738	EGR1	early growth response 1	61.2794	7.31571	2.7781	1.11926e-21	20.9511	3.06633	5	138468082	138469315							1
ENSG00000004059	ARF5	ADP ribosylation factor 5	85.0956	10.1629	2.86135	2.00585e-30	29.6977	3.06578	7	127589485	127589831							1
ENSG00000234964	FABP5P7	fatty acid binding protein 5 pseudogene 7	373.613	44.6678	3.01038	4.13831e-103	102.383	3.06424	11	59781318	59781722	1						0
ENSG00000133019	CHRM3	cholinergic receptor muscarinic 3	33.3879	3.99209	2.45686	1.10324e-11	10.9573	3.06411	1	239907433	239907451							1
ENSG00000232677	LINC00665	long intergenic non-protein coding RNA 665	245.018	29.5279	2.94686	3.95627e-63	62.4027	3.05273	19	36324937	36327225			1				0
ENSG00000236238	AC093106.1	NA	403.092	48.7153	2.97901	3.4509e-79	78.4621	3.04866	7	131665507	131665858		1					0
ENSG00000131080	EDA2R	ectodysplasin A2 receptor	112.455	13.6452	2.85971	3.31442e-34	33.4796	3.04289	0	66599484	66599486							1
ENSG00000236592	S100A11P2	S100 calcium binding protein A11 pseudogene 2	10.3194	1.25401	1.70675	0.000156507	3.80547	3.04075	7	35169224	35169535	1						0
ENSG00000215035	FDPSP5	farnesyl diphosphate synthase pseudogene 5	22.0972	2.68665	2.30755	3.78286e-09	8.42218	3.03999	0	44476027	44476622	1						0
ENSG00000215386	MIR99AHG	mir-99a-let-7c cluster host gene	69.4639	8.44652	2.7499	4.80317e-23	22.3185	3.03983	21	16640230	16640633				1			0
ENSG00000260266	PPIAP46	peptidylprolyl isomerase A pseudogene 46	65.6925	7.98818	2.72984	4.6908e-21	20.3288	3.03979	15	74361552	74362041	1						0
ENSG00000213867	AL049830.1	NA	334.69	40.7041	2.9473	4.77094e-82	81.3214	3.03958	14	30821419	30821843		1					0
ENSG00000244722	RPSAP29	ribosomal protein SA pseudogene 29	106.065	12.9208	2.83559	2.0959e-32	31.6786	3.03718	3	110682286	110683154	1						0
ENSG00000172965	MIR4435-2HG	MIR4435-2 host gene	93.0913	11.3544	2.76687	2.00506e-28	27.6979	3.0354	2	111469638	111469987				1			0
ENSG00000154237	LRRK1	leucine rich repeat kinase 1	50.1314	6.12374	2.69753	8.7483e-17	16.0581	3.03323	15	101068671	101070103							1
ENSG00000228169	PPIAP19	peptidylprolyl isomerase A pseudogene 19	11.5905	1.42291	1.8649	2.28402e-05	4.6413	3.02603	10	114690143	114690634	1						0
ENSG00000257074	RPL29P33	ribosomal protein L29 pseudogene 33	55.1773	6.78561	2.63021	1.8855e-18	17.7246	3.02352	19	34296277	34296592	1						0
ENSG00000228071	RPL7P47	ribosomal protein L7 pseudogene 47	216.506	26.6605	2.89575	2.83752e-57	56.5471	3.02164	16	17932720	17933275	1						0
ENSG00000224167	AL390729.1	NA	29.197	3.59626	2.46683	8.15493e-11	10.0886	3.02125	1	112877730	112877867		1					0
ENSG00000240459	AC093663.1	NA	104.126	12.8482	2.84352	1.92726e-33	32.7151	3.0187	4	112116510	112116903		1					0
ENSG00000231635	ATP5F1BP1	ATP synthase F1 subunit beta pseudogene 1	10.6172	1.31164	1.78425	6.89153e-05	4.16168	3.01696	2	98206151	98207724	1						0
ENSG00000230911	PPIHP1	peptidylprolyl isomerase H pseudogene 1	93.6119	11.6381	2.72982	1.37336e-28	27.8622	3.00784	11	112029858	112030367	1						0
ENSG00000225392	AC016700.1	NA	44.9036	5.6007	2.60254	1.32226e-15	14.8787	3.00315	2	70102551	70102862		1					0
ENSG00000105988	NHP2P1	NHP2 ribonucleoprotein pseudogene 1	136.763	17.0637	2.79571	4.18218e-43	42.3786	3.00267	10	92216332	92216793	1						0
ENSG00000253346	AC109329.1	NA	18.6912	2.34311	2.13517	2.40221e-07	6.61939	2.99586	8	30331961	30332277		1					0
ENSG00000189212	DPY19L2P1	DPY19L2 pseudogene 1	12.2619	1.53904	1.86964	3.79934e-05	4.42029	2.99408	7	35089844	35091946	1						0
ENSG00000213003	BTF3P12	basic transcription factor 3 pseudogene 12	39.5195	4.96993	2.5509	1.72138e-14	13.7641	2.99127	8	70273369	70273837	1						0
ENSG00000188483	IER5L	immediate early response 5 like	281.031	35.345	2.89123	6.10029e-78	77.2146	2.99115	9	129175552	129176837							1
ENSG00000230568	SF3A3P1	splicing factor 3a, subunit 3 pseudogene 1	12.7085	1.59888	1.87428	2.11054e-05	4.67561	2.99067	20	3489529	3491005	1						0
ENSG00000241571	ATP5F1AP7	ATP synthase F1 subunit alpha pseudogene 7	14.9509	1.88258	1.95672	9.9519e-06	5.00209	2.98945	9	62686912	62688190	1						0
ENSG00000241081	RPL22P2	ribosomal protein L22 pseudogene 2	134.041	16.9036	2.83308	2.55957e-43	42.5918	2.98727	14	76886377	76886750	1						0
ENSG00000256393	RPL41P5	ribosomal protein L41 pseudogene 5	590.046	74.4605	2.90567	1.53272e-135	134.815	2.98628	12	93083598	93083675	1						0
ENSG00000241912	AC078788.2	NA	13.1604	1.66358	2.14115	2.33484e-07	6.63174	2.98384	3	153377246	153377562		1					0
ENSG00000182315	MBD3L3	methyl-CpG binding domain protein 3 like 3	10.3194	1.31164	1.85338	2.11416e-05	4.67486	2.97592	19	7056209	7056321							1
ENSG00000256331	NIFKP3	nucleolar protein interacting with the FHA domain of MKI67 pseudogene 3	14.7697	1.88478	1.96421	6.47256e-06	5.18892	2.97018	12	7604350	7605214	1						0
ENSG00000232228	AC092431.2	NA	195.917	25.0017	2.84909	6.97698e-53	52.1563	2.97014	2	69594741	69595058		1					0
ENSG00000250384	UBE2CP3	ubiquitin conjugating enzyme E2 C pseudogene 3	24.603	3.14499	2.35391	1.76489e-09	8.75328	2.96771	4	57072683	57073132	1						0
ENSG00000133874	RNF122	ring finger protein 122	339.332	43.3859	2.89316	1.13396e-87	86.9454	2.9674	8	33547755	33548752							1
ENSG00000164690	SHH	sonic hedgehog	11.1418	1.42644	1.81105	4.2275e-05	4.37392	2.96549	7	155806582	155806839							1
ENSG00000227361	RPS24P7	ribosomal protein S24 pseudogene 7	103.977	13.3778	2.75697	3.19694e-30	29.4953	2.95835	2	61803143	61803388	1						0
ENSG00000203727 #or# ENSG00000227681 /// ENSG00000203727	SAMD5	sterile alpha motif domain containing 5 #or# NA /// sterile alpha motif domain containing 5	95.6741	12.3225	2.70466	5.09192e-30	29.2931	2.95684	6	147737449	147737547							1
ENSG00000120885	CLU	clusterin	436.569	56.2535	2.8712	7.42956e-87	86.129	2.95619	8	27610572	27610600							1
ENSG00000225580	AL358942.1	NA	51.2558	6.62024	2.57887	3.69659e-17	16.4322	2.95276	6	112616703	112617880		1					0
ENSG00000139180 #or# ENSG00000255639 /// ENSG00000139180 #or# ENSG00000272921 /// as__ENSG00000139180 #or# as__ENSG00000272921 /// as__ENSG00000139180 #or# as__ENSG00000255639 /// ENSG00000139180 #or# ENSG00000255639 #or# ENSG00000272921	AC005833.2	NADH:ubiquinone oxidoreductase subunit A9 #or# NA /// NADH:ubiquinone oxidoreductase subunit A9 #or# NA #or# NA	67.5223	8.73509	2.69174	5.96654e-24	23.2243	2.95047	12	4744517	4744581		1					0
ENSG00000206147	RPL23AP57	ribosomal protein L23a pseudogene 57	82.7366	10.7404	2.71054	1.38212e-25	24.8595	2.94548	9	6639139	6639604	1						0
ENSG00000081665	ZNF506	zinc finger protein 506	21.5352	2.80145	2.23342	1.41081e-08	7.85053	2.94245	19	19820255	19820666							1
ENSG00000231744	AL669818.1	NA	60.1605	7.83255	2.67293	3.00118e-20	19.5227	2.94126	9	124598707	124599157		1					0
ENSG00000167748	KLK1	kallikrein 1	26.7287	3.48365	2.30909	2.52448e-09	8.59783	2.93972	19	50819271	50819349							1
ENSG00000276180	HIST1H4I	histone cluster 1 H4 family member i	170.521	22.2531	2.79138	4.79024e-50	49.3196	2.93788	6	27139621	27139881							1
ENSG00000228938	SNRPD2P1	small nuclear ribonucleoprotein D2 pseudogene 1	538.142	70.2946	2.8902	6.47819e-138	137.189	2.9365	10	89978717	89979070	1						0
ENSG00000231169	EEF1B2P1	eukaryotic translation elongation factor 1 beta 2 pseudogene 1	103.645	13.5875	2.73378	5.96865e-31	30.2241	2.93129	15	52505191	52505862	1						0
ENSG00000197182 #or# ENSG00000241990 /// ENSG00000197182 #or# ENSG00000284520 /// ENSG00000197182 #or# ENSG00000284175 /// ENSG00000197182	MIRLET7BHG	MIRLET7B host gene #or# PRR34 antisense RNA 1 /// MIRLET7B host gene #or# microRNA let-7b /// MIRLET7B host gene #or# microRNA 4763 /// MIRLET7B host gene	46.5796	6.10914	2.50742	4.01108e-15	14.3967	2.93066	22	46109764	46113928				1			0
ENSG00000225053	PRPF38AP1	PRP38 domain containing A pseudogene 1	11.2532	1.48628	1.80288	5.16007e-05	4.28734	2.92056	10	8161260	8162192	1						0
ENSG00000229503	AC092155.2	NA	118.704	15.6918	2.76337	2.23453e-34	33.6508	2.91929	2	62532583	62533059		1					0
ENSG00000235605	AL355472.2	NA	981.728	130.017	2.81126	9.08299e-69	68.0418	2.91662	1	234356704	234357141		1					0
ENSG00000224058	AC006509.1	NA	62.0603	8.21998	2.55492	1.1466e-20	19.9406	2.91646	2	47731402	47732035		1					0
ENSG00000216867	RPL22P12	ribosomal protein L22 pseudogene 12	18.0239	2.39235	2.11328	1.02899e-06	5.98759	2.91341	2	110633947	110634333	1						0
ENSG00000161405	IKZF3	IKAROS family zinc finger 3	37.0137	4.91496	2.47167	2.07377e-12	11.6832	2.91281	17	39864127	39864127							1
ENSG00000214653	HNRNPA3P3	heterogeneous nuclear ribonucleoprotein A3 pseudogene 3	11.5884	1.54124	1.71912	8.95697e-05	4.04784	2.91052	0	140032344	140033480	1						0
ENSG00000225630	MTND2P28	mitochondrially encoded NADH:ubiquinone oxidoreductase core subunit 2 pseudogene 28	2639.58	351.236	2.61387	2.70623e-21	20.5676	2.90979	1	629640	630683	1						0
ENSG00000198695	MT-ND6	mitochondrially encoded NADH:ubiquinone oxidoreductase core subunit 6	5476.7	731.637	2.66254	4.2788e-26	25.3687	2.90411	0	14149	14151						1	0
ENSG00000214263	RPSAP53	ribosomal protein SA pseudogene 53	24.3417	3.25272	2.27516	2.07296e-09	8.68341	2.90371	13	67266845	67267706	1						0
ENSG00000241255	AL136126.1	NA	336.554	45.0987	2.82068	7.97204e-77	76.0984	2.89968	11	33237008	33237409		1					0
ENSG00000279081	AL356585.1	NA	15.3318	2.05721	2.0434	2.13926e-06	5.66974	2.89776	13	18206570	18207466		1					0
ENSG00000214297	ALDOAP2	aldolase, fructose-bisphosphate A pseudogene 2	15.7035	2.11218	2.02629	1.49856e-06	5.82433	2.89428	10	125666875	125667950	1						0
ENSG00000229083	PSMA6P2	proteasome subunit alpha 6 pseudogene 2	101.915	13.7116	2.66263	1.31836e-30	29.88	2.8939	0	12826669	12826833	1						0
ENSG00000247134	AC090204.1	NA	75.4821	10.1575	2.58781	1.31323e-20	19.8817	2.89359	8	33044367	33044855		1					0
ENSG00000215093	EEF1A1P29	eukaryotic translation elongation factor 1 alpha 1 pseudogene 29	222.191	29.9322	2.79491	6.93176e-65	64.1592	2.89203	0	86160264	86161359	1						0
ENSG00000224993	RPL29P12	ribosomal protein L29 pseudogene 12	45.6531	6.17164	2.55711	4.66812e-16	15.3309	2.88699	5	43666766	43667232	1						0
ENSG00000237631	AL161454.1	NA	18.581	2.51202	2.13088	1.46459e-07	6.83428	2.88691	9	95918136	95918704		1					0
ENSG00000167244 #or# ENSG00000240801 #or# ENSG00000284779 /// ENSG00000129965 #or# ENSG00000167244 #or# ENSG00000284779 /// ENSG00000167244 /// ENSG00000167244 #or# ENSG00000284779	IGF2	insulin like growth factor 2 /// insulin like growth factor 2 #or# NA #or# insulin like growth factor 2 /// INS-IGF2 readthrough #or# insulin like growth factor 2 #or# insulin like growth factor 2 /// insulin like growth factor 2 #or# insulin like growth factor 2	165.708	22.4334	2.72905	8.96701e-44	43.0474	2.88492	11	2132716	2132986							1
ENSG00000225486	AL663058.1	NA	78.6227	10.6589	2.55506	8.80124e-24	23.0555	2.88289	1	233836080	233836432		1					0
ENSG00000214298	MRPS21P6	mitochondrial ribosomal protein S21 pseudogene 6	34.4696	4.67696	2.41616	2.40024e-12	11.6197	2.88168	10	125166677	125166937	1						0
ENSG00000271711	AC069236.1	NA	16.8601	2.28815	2.06947	5.88898e-07	6.22996	2.88137	3	150611262	150611877		1					0
ENSG00000229241	PNPT1P1	polyribonucleotide nucleotidyltransferase 1 pseudogene 1	18.5079	2.51908	2.15814	9.95862e-08	7.0018	2.87717	3	3981981	3984295	1						0
ENSG00000135314	KHDC1	KH domain containing 1	92.1993	12.5569	2.64257	1.98467e-28	27.7023	2.87627	6	73275046	73275159							1
ENSG00000213661	AC106806.1	NA	34.8444	4.7474	2.43869	7.87686e-13	12.1036	2.87572	5	121616247	121616807		1					0
ENSG00000213409	C1QBPP2	complement C1q binding protein pseudogene 2	105.619	14.3921	2.72708	2.97078e-34	33.5271	2.87552	11	66761575	66762399	1						0
ENSG00000181649	PHLDA2	pleckstrin homology like domain family A member 2	302.953	41.2981	2.82446	1.89456e-80	79.7225	2.87495	11	2928417	2928667							1
ENSG00000203326	ZNF525	zinc finger protein 525	15.8503	2.16848	1.99234	4.39014e-06	5.35752	2.86975	19	53384970	53385231							1
ENSG00000226948	RPS4XP2	ribosomal protein S4X pseudogene 2	590.322	80.875	2.79461	1.88535e-136	135.725	2.86774	20	4629427	4630219	1						0
ENSG00000279865	AC006511.3	NA	380.085	52.2118	2.81926	5.06533e-98	97.2954	2.86387	12	8080381	8082163		1					0
ENSG00000250722	SELENOP	selenoprotein P	365.337	50.2109	2.80446	2.02541e-94	93.6935	2.86316	5	42807818	42808366							1
ENSG00000196154	S100A4	S100 calcium binding protein A4	49.7628	6.91501	2.56499	1.14437e-16	15.9414	2.84726	1	153543621	153543758							1
ENSG00000256849	TCP1P3	t-complex 1 pseudogene 3	39.8516	5.54927	2.47328	7.2299e-14	13.1409	2.84427	12	19941521	19943018	1						0
ENSG00000243167	RPS10P28	ribosomal protein S10 pseudogene 28	12.6741	1.76864	1.80173	3.05113e-05	4.51554	2.84117	19	42670358	42670816	1						0
ENSG00000258563	PSMA3P	proteasome subunit alpha 3 pseudogene	16.3374	2.28108	2.02798	9.452e-07	6.02448	2.84039	14	60179382	60180016	1						0
ENSG00000231369	Z97353.1	NA	149.514	20.9374	2.65445	1.41404e-44	43.8495	2.83612	22	26886909	26887316		1					0
ENSG00000196172	ZNF681	zinc finger protein 681	28.413	3.99342	2.25014	6.92781e-10	9.1594	2.83085	19	23754842	23754897							1
ENSG00000230291	AC078817.1	NA	1022.19	143.751	2.77743	1.05352e-201	200.977	2.83003	12	80102899	80103333		1					0
ENSG00000237686	AL109615.3	NA	273.525	38.528	2.81333	5.8572e-85	84.2323	2.82769	6	43997182	43997308		1					0
ENSG00000238072	AC009244.1	NA	63.8904	9.02672	2.52267	8.85375e-21	20.0529	2.82332	7	129410113	129410370		1					0
ENSG00000213148	AC073465.1	NA	134.03	19.0096	2.63616	1.76786e-38	37.7526	2.81776	2	173431349	173431812		1					0
ENSG00000250444	CCT5P1	chaperonin containing TCP1 subunit 5 pseudogene 1	82.1371	11.6597	2.62343	7.24519e-26	25.14	2.8165	5	115512077	115513694	1						0
ENSG00000186743	TPI1P3	triosephosphate isomerase 1 pseudogene 3	12.8595	1.82981	1.88315	9.79368e-06	5.00905	2.81307	6	116038756	116039495	1						0
ENSG00000256093	AC122688.1	NA	25.6856	3.65609	2.28368	4.75482e-10	9.32287	2.81259	12	125056359	125056581		1					0
ENSG00000184414	IRS3P	insulin receptor substrate 3, pseudogene	17.9843	2.56918	1.99669	8.46377e-07	6.07244	2.80735	7	100570131	100571136	1						0
ENSG00000198435	NRARP	NOTCH regulated ankyrin repeat protein	272.443	39.052	2.69581	1.63789e-62	61.7857	2.80249	9	137300482	137301583							1
ENSG00000242697	RPL5P12	ribosomal protein L5 pseudogene 12	443.899	63.6469	2.72683	4.64546e-108	107.333	2.80207	4	98025390	98026240	1						0
ENSG00000213197	AC012066.1	NA	17.4597	2.50715	2.01715	5.20128e-07	6.28389	2.79991	2	152389937	152390630		1					0
ENSG00000106003	LFNG	LFNG O-fucosylpeptide 3-beta-N-acetylglucosaminyltransferase	24.603	3.53509	2.17431	5.8147e-09	8.23547	2.79901	7	2527213	2528427							1
ENSG00000135604	STX11	syntaxin 11	17.4597	2.51068	2.00797	1.0882e-06	5.96329	2.79787	6	144187492	144188370							1
ENSG00000213082	PPP1R14BP2	protein phosphatase 1 regulatory inhibitor subunit 14B pseudogene 2	89.9842	12.9484	2.53735	1.44337e-26	25.8406	2.7969	2	207681590	207682033	1						0
ENSG00000236334	PPIAL4G	peptidylprolyl isomerase A like 4G	66.9624	9.63849	2.53543	7.98934e-22	21.0975	2.79647	1	148479824	148482757							1
ENSG00000280346	FP236240.3	NA	18.6163	2.68178	1.99058	7.18768e-07	6.14341	2.7953	21	6507017	6507389		1					0
ENSG00000258605	DYNLL1P2	dynein light chain LC8-type 1 pseudogene 2	58.478	8.44872	2.46263	2.03813e-17	16.6908	2.79109	14	81412970	81413239	1						0
ENSG00000236444	UBE2L5	ubiquitin conjugating enzyme E2 L5	20.1152	2.90918	2.08206	1.067e-07	6.97183	2.7896	13	30428453	30428455							1
ENSG00000239223	RPL34P31	ribosomal protein L34 pseudogene 31	174.077	25.3058	2.67176	8.97243e-45	44.0471	2.78219	17	27274107	27274477	1						0
ENSG00000223756	TSSC2	tumor suppressing subtransferable candidate 2 pseudogene	19.628	2.85422	2.08685	2.56323e-07	6.59121	2.78175	11	3408686	3408810	1						0
ENSG00000259707	AC105339.4	NA	39.253	5.70843	2.36143	1.23474e-13	12.9084	2.78164	15	82691723	82692358		1					0
ENSG00000226457	RPL22P3	ribosomal protein L22 pseudogene 3	27.78	4.04839	2.18377	6.01988e-10	9.22041	2.77863	1	16369150	16369530	1						0
ENSG00000177350	RPL13AP3	ribosomal protein L13a pseudogene 3	114.213	16.6656	2.6017	1.38752e-32	31.8578	2.77678	14	55766245	55767717	1						0
ENSG00000256745	AP002784.2	NA	189.285	27.6632	2.61931	2.8204e-49	48.5497	2.77452	11	94188449	94188997		1					0
ENSG00000254935	AP002469.1	NA	15.9648	2.33825	1.91674	1.83611e-06	5.7361	2.77139	11	122618851	122619274		1					0
ENSG00000235084	CHCHD2P6	coiled-coil-helix-coiled-coil-helix domain containing 2 pseudogene 6	378.472	55.536	2.69127	1.13738e-93	92.9441	2.76869	1	15604597	15605043	1						0
ENSG00000253991	AP001207.2	NA	10.1331	1.48761	1.76015	8.74612e-05	4.05818	2.76801	8	101528723	101529143		1					0
ENSG00000233839	AL357055.1	NA	591.394	87.223	2.69343	1.22561e-133	132.912	2.76134	1	113168994	113169403		1					0
ENSG00000264281	AC016596.2	NA	434.795	64.5569	2.62383	1.10197e-43	42.9578	2.75169	5	55944656	55944733		1					0
ENSG00000272888 #or# ENSG00000279765 /// ENSG00000279765	AC013394.1	NA /// long intergenic non-protein coding RNA 1578 #or# NA	11.8944	1.76864	1.81173	2.11565e-05	4.67456	2.74957	15	92948952	92949230		1					0
ENSG00000236539	HNRNPA1P54	heterogeneous nuclear ribonucleoprotein A1 pseudogene 54	10.7295	1.59621	1.52525	0.000659624	3.1807	2.74887	1	179447602	179457315	1						0
ENSG00000121310	ECHDC2	enoyl-CoA hydratase domain containing 2	28.0029	4.17513	2.1769	9.03691e-09	8.04398	2.74568	1	52913720	52914095							1
ENSG00000206567	AC022007.1	NA	35.1766	5.2545	2.19805	1.65103e-10	9.78224	2.74299	3	10009888	10010402		1					0
ENSG00000228236	TXNP5	thioredoxin pseudogene 5	354.155	52.9907	2.66717	9.25147e-88	87.0338	2.74057	2	149068596	149068910	1						0
ENSG00000240392	RPL9P3	ribosomal protein L9 pseudogene 3	247.252	36.9993	2.67389	2.0372e-59	58.691	2.74041	14	35262462	35263036	1						0
ENSG00000215006	CHCHD2P2	coiled-coil-helix-coiled-coil-helix domain containing 2 pseudogene 2	27.8509	4.16806	2.17023	1.04863e-09	8.97938	2.74028	5	69333929	69334249	1						0
ENSG00000224488	SAMM50P1	SAMM50 sorting and assembly machinery component pseudogene 1	20.1892	3.03239	2.08398	7.99574e-08	7.09714	2.73506	9	17447145	17448543	1						0
ENSG00000166530	HSBP1P2	heat shock factor binding protein 1 pseudogene 2	24.6404	3.71459	2.17448	2.72507e-09	8.56462	2.72975	4	110251871	110252099	1						0
ENSG00000166012 #or# ENSG00000207112	SNORA25	TATA-box binding protein associated factor, RNA polymerase I subunit D #or# small nucleolar RNA, H/ACA box 25	17.7949	2.68665	2.01694	6.78609e-07	6.16838	2.72758	11	93730513	93730646					1		0
ENSG00000213683	AC002056.1	NA	364.847	55.0998	2.66878	2.52862e-88	87.5971	2.72717	22	50754675	50755434		1					0
ENSG00000236533	AC009413.1	NA	57.7662	8.72755	2.41268	9.31397e-18	17.0309	2.72658	2	41850203	41850601		1					0
ENSG00000196754	S100A2	S100 calcium binding protein A2	23.7775	3.60952	2.25623	2.24099e-09	8.64956	2.71972	1	153561349	153561566							1
ENSG00000111775 #or# ENSG00000111780 /// ENSG00000111780 #or# ENSG00000257218	AL021546.1	NA #or# glutamyl-tRNA amidotransferase subunit C /// cytochrome c oxidase subunit 6A1 #or# NA	236.155	35.8583	2.59845	3.84108e-57	56.4155	2.71936	12	120459960	120460006		1					0
ENSG00000230508	RPL19P21	ribosomal protein L19 pseudogene 21	62.3623	9.48286	2.47671	1.0047e-20	19.998	2.71728	0	150993501	150994091	1						0
ENSG00000105889	STEAP1B	STEAP family member 1B	67.03	10.2799	2.45754	1.15935e-19	18.9358	2.70499	7	22494856	22494886							1
ENSG00000219085	NPM1P37	nucleophosmin 1 pseudogene 37	46.0632	7.07991	2.40108	5.28957e-16	15.2766	2.70181	6	69705287	69706160	1						0
ENSG00000277952	AC092745.3	NA	20.5649	3.19642	2.05342	1.51252e-07	6.8203	2.68566	12	8340182	8340397		1					0
ENSG00000277447	AP005431.1	NA	129.59	20.1453	2.52362	5.83114e-35	34.2342	2.68544	18	3025069	3025387		1					0
ENSG00000129455 /// ENSG00000129455 #or# ENSG00000269741	KLK8	kallikrein related peptidase 8 #or# NA /// kallikrein related peptidase 8	24.2272	3.76736	2.15824	8.08608e-09	8.09226	2.68501	19	51000385	51000718							1
ENSG00000239917	RPS10P16	ribosomal protein S10 pseudogene 16	48.4201	7.53691	2.36669	4.50592e-15	14.3462	2.68356	8	117523271	117523705	1						0
ENSG00000225528	Z82206.1	NA	71.4097	11.1407	2.50839	7.44128e-21	20.1284	2.68028	22	39964570	39964718		1					0
ENSG00000218502	H2AFZP3	H2A histone family member Z pseudogene 3	70.1032	10.9656	2.45336	2.13305e-21	20.671	2.6765	13	99215372	99215758	1						0
ENSG00000220744	RPL5P18	ribosomal protein L5 pseudogene 18	41.9491	6.56174	2.31674	1.52636e-13	12.8163	2.67649	6	127362513	127363403	1						0
ENSG00000230626	AC011005.1	NA	35.0286	5.48103	2.21948	3.4821e-11	10.4582	2.67601	7	129130749	129130793		1					0
ENSG00000180257	ZNF816	zinc finger protein 816	15.2882	2.39455	1.75455	3.59029e-05	4.44487	2.6746	19	52956090	52956104							1
ENSG00000231799	PA2G4P6	proliferation-associated 2G4 pseudogene 6	136.536	21.4192	2.57202	2.75712e-38	37.5595	2.67231	9	89449558	89450754	1						0
ENSG00000243095	RPL3P10	ribosomal protein L3 pseudogene 10	172.538	27.0678	2.57345	1.08577e-43	42.9643	2.67227	8	39157538	39158701	1						0
ENSG00000260326	PHBP21	prohibitin pseudogene 21	18.9546	2.97875	2.10189	6.74054e-08	7.17131	2.66976	16	52934813	52935635	1						0
ENSG00000214460	TPT1P6	tumor protein, translationally-controlled 1 pseudogene 6	21.0459	3.31255	2.03626	1.26882e-07	6.8966	2.66752	6	85427453	85427966	1						0
ENSG00000232388 #or# ENSG00000284776	AL121900.2	small integral membrane protein 26 #or# NA	56.1546	8.84235	2.33143	3.89277e-18	17.4097	2.6669	20	18567453	18567478		1					0
ENSG00000196535	MYO18A	myosin XVIIIA	11.5519	1.82141	1.58171	0.000388853	3.41021	2.665	17	29133761	29133858							1
ENSG00000240898	AC132942.1	NA	118.658	18.7202	2.4798	4.31372e-32	31.3651	2.66415	17	3665220	3665702		1					0
ENSG00000130600	H19	H19, imprinted maternally expressed transcript (non-protein coding)	18.8441	2.97522	2.05135	2.68821e-07	6.57054	2.66304	11	1997076	1997514							1
ENSG00000238076	MRPL48P1	mitochondrial ribosomal protein L48 pseudogene 1	41.5328	6.56614	2.22943	7.06379e-13	12.151	2.66113	6	10459906	10460541	1						0
ENSG00000218748	DBIP1	diazepam binding inhibitor, acyl-CoA binding protein pseudogene 1	48.7492	7.70715	2.3557	5.06743e-15	14.2952	2.66111	6	79436908	79437167	1						0
ENSG00000253438 /// ENSG00000212993 #or# ENSG00000253438	PCAT1	POU class 5 homeobox 1B #or# prostate cancer associated transcript 1 (non-protein coding) /// prostate cancer associated transcript 1 (non-protein coding)	13.7215	2.17335	1.8779	2.15918e-05	4.66571	2.65844	8	127394308	127394735							1
ENSG00000243777	AP000942.1	NA	73.3893	11.6367	2.37188	2.96885e-21	20.5274	2.65688	11	102295060	102295806		1					0
ENSG00000224976	PARP4P2	poly(ADP-ribose) polymerase family member 4 pseudogene 2	13.3102	2.11218	1.76964	3.98281e-05	4.39981	2.65572	13	19407770	19407962	1						0
ENSG00000240135	PSMD12P	proteasome 26S subunit, non-ATPase, 12 pseudogene	37.348	5.94557	2.33055	6.72567e-13	12.1723	2.65114	3	72876737	72878102	1						0
ENSG00000205090	TMEM240	transmembrane protein 240	21.1625	3.37239	2.07795	1.59458e-07	6.79735	2.64967	1	1539056	1539679							1
ENSG00000244266	AC090058.1	NA	10.7317	1.71368	1.6884	0.000135909	3.86675	2.64671	12	50365652	50366086		1					0
ENSG00000180801	ARSJ	arylsulfatase family member J	41.6869	6.68361	2.29617	5.61256e-13	12.2508	2.6409	4	113946192	113946415							1
ENSG00000175793	SFN	stratifin	10.282	1.65384	1.64784	0.000154242	3.8118	2.63622	1	26863960	26864457							1
ENSG00000133169	BEX1	brain expressed X-linked 1	67.0352	10.791	2.4147	5.55748e-21	20.2551	2.63509	0	103062651	103062896							1
ENSG00000224114	AL591846.1	NA	66.2899	10.6762	2.42895	3.78193e-21	20.4223	2.63439	1	206695837	206696269		1					0
ENSG00000213080	AL354714.2	NA	12.0381	1.93974	1.65096	0.000138188	3.85953	2.63367	1	160894980	160896076		1					0
ENSG00000104879	CKM	creatine kinase, M-type	12.0756	1.94595	1.7991	2.91429e-05	4.53547	2.63355	19	45306414	45306749							1
ENSG00000234289 /// as__ENSG00000234289 /// ENSG00000274559 /// as__ENSG00000274559	H2BFS	H2B histone family member S	19.4012	3.13525	1.8728	1.2845e-06	5.89126	2.62949	21	43565620	43565648							1
ENSG00000237888	AC087650.1	NA	11.6259	1.88124	1.64335	0.000182512	3.73871	2.62758	17	43476198	43476665		1					0
ENSG00000267475	AC008736.1	NA	29.6497	4.80016	2.22617	1.52225e-10	9.81751	2.62686	19	32687089	32687268		1					0
ENSG00000217385	PSMC1P11	proteasome 26S subunit, ATPase 1 pseudogene 11	15.5151	2.51688	1.94654	4.20209e-06	5.37653	2.62396	6	4702463	4703779	1						0
ENSG00000236078	LINC01447	long intergenic non-protein coding RNA 1447	55.7061	9.04132	2.4434	2.6537e-20	19.5761	2.62323	7	47628697	47629893			1				0
ENSG00000270460	AC106900.2	NA	15.8503	2.57405	1.83865	9.48032e-06	5.02318	2.6224	2	173811076	173811392		1					0
ENSG00000235420	RPL29P30	ribosomal protein L29 pseudogene 30	21.7964	3.53995	2.0565	5.53998e-08	7.25649	2.62229	15	70796657	70797131	1						0
ENSG00000213383	AC104297.1	NA	63.9653	10.3925	2.38466	7.13016e-20	19.1469	2.62175	3	17871729	17872598		1					0
ENSG00000250526	CCT6P2	chaperonin containing TCP1 subunit 6 pseudogene 2	68.4521	11.1248	2.36906	2.14464e-20	19.6686	2.62132	5	14639426	14641018	1						0
ENSG00000227203	SUB1P1	SUB1 homolog, transcriptional regulator pseudogene 1	141.471	23.0022	2.48783	6.91473e-39	38.1602	2.62066	8	11790005	11790386	1						0
ENSG00000214998	CCNB2P1	cyclin B2 pseudogene 1	66.2877	10.787	2.31985	1.77318e-17	16.7512	2.61945	7	7909300	7910449	1						0
ENSG00000227347	HNRNPKP2	heterogeneous nuclear ribonucleoprotein K pseudogene 2	21.0085	3.42249	1.92458	7.5286e-07	6.12329	2.61785	2	136199114	136200503	1						0
ENSG00000233544	EIF3KP2	eukaryotic translation initiation factor 3 subunit K pseudogene 2	89.0888	14.5424	2.37417	3.56136e-24	23.4484	2.61498	3	24555834	24556459	1						0
ENSG00000236189	RPL18AP15	ribosomal protein L18a pseudogene 15	59.2933	9.70406	2.32225	2.33987e-17	16.6308	2.61121	0	111624210	111624726	1						0
ENSG00000231167	YBX1P2	Y-box binding protein 1 pseudogene 2	172.133	28.2114	2.5033	4.09418e-44	43.3878	2.60917	7	105582258	105583256	1						0
ENSG00000229696	KARSP1	lysyl-tRNA synthetase pseudogene 1	17.7595	2.91272	1.90667	2.69598e-06	5.56928	2.60816	13	41925598	41927349	1						0
ENSG00000283621 /// ENSG00000135446 #or# ENSG00000283621	MIR6759	microRNA 6759 /// cyclin dependent kinase 4 #or# microRNA 6759	21.3842	3.53509	1.97094	8.15372e-08	7.08864	2.59673	12	57748618	57748682				1			0
ENSG00000214203	RPS4XP1	ribosomal protein S4X pseudogene 1	147.154	24.3319	2.50064	5.57618e-41	40.2537	2.5964	12	100009052	100009838	1						0
ENSG00000233328	PFN1P1	profilin 1 pseudogene 1	701.459	116.102	2.46696	1.57145e-38	37.8037	2.59496	1	171670517	171670939	1						0
ENSG00000225715	AL512504.1	NA	15.4776	2.56565	1.80078	7.36788e-06	5.13266	2.59279	0	80709928	80710705		1					0
ENSG00000253785	AC008429.2	NA	135.043	22.4827	2.43612	7.17061e-37	36.1444	2.58653	5	172975511	172976374		1					0
ENSG00000215349	MRPL3P1	mitochondrial ribosomal protein L3 pseudogene 1	30.8822	5.14237	2.17177	2.61851e-10	9.58195	2.58627	13	19304593	19305625	1						0
ENSG00000231164	RPL7P56	ribosomal protein L7 pseudogene 56	125.176	20.8979	2.43261	1.42434e-31	30.8464	2.58253	0	136791064	136791780	1						0
ENSG00000249264	EEF1A1P9	eukaryotic translation elongation factor 1 alpha 1 pseudogene 9	375.073	62.6885	2.5145	1.03483e-83	82.9851	2.5809	4	105484698	105486080	1						0
ENSG00000271072	PHBP20	prohibitin pseudogene 20	17.7209	2.96768	1.84337	2.28364e-06	5.64137	2.57804	15	72450657	72451474	1						0
ENSG00000227939	RPL3P2	ribosomal protein L3 pseudogene 2	402.703	67.5197	2.54987	6.13251e-87	86.2124	2.57633	6	31280317	31281519	1						0
ENSG00000237064	EIF3IP1	eukaryotic translation initiation factor 3 subunit I pseudogene 1	11.1783	1.87771	1.66016	9.85915e-05	4.00616	2.57365	7	109959218	109960184	1						0
ENSG00000223550	SNRPBP1	small nuclear ribonucleoprotein polypeptides B and B1 pseudogene 1	97.5346	16.4409	2.4006	7.18358e-26	25.1437	2.56862	7	80377554	80377835	1						0
ENSG00000249855	EEF1A1P19	eukaryotic translation elongation factor 1 alpha 1 pseudogene 19	179.239	30.3117	2.46074	1.18854e-43	42.925	2.56394	5	43495073	43496454	1						0
ENSG00000244052	RPL5P24	ribosomal protein L5 pseudogene 24	910.051	154.852	2.5104	1.23592e-134	133.908	2.55505	8	102923371	102924255	1						0
ENSG00000223540	RPS15AP5	ribosomal protein S15a pseudogene 5	102.852	17.6315	2.38198	2.3127e-26	25.6359	2.54434	10	121713607	121713994	1						0
ENSG00000149735	GPHA2	glycoprotein hormone alpha 2	10.6172	1.82494	1.57102	0.00035287	3.45239	2.54048	11	64934862	64934921							1
ENSG00000214922 #or# ENSG00000239257	RPL23AP1	HLA-F antisense RNA 1 #or# ribosomal protein L23a pseudogene 1	16.5633	2.85422	1.87193	5.03331e-06	5.29815	2.53683	6	29726669	29727139	1						0
ENSG00000224061	AC092106.1	NA	12.2619	2.11705	1.69538	0.000101712	3.99263	2.53406	2	106253231	106253717		1					0
ENSG00000213467	HMGB1P37	high mobility group box 1 pseudogene 37	12.187	2.10865	1.6355	0.000180277	3.74406	2.53095	9	121519816	121520424	1						0
ENSG00000135406	PRPH	peripherin	113.729	19.6945	2.37951	7.10179e-29	28.1486	2.52974	12	49298288	49298648							1
ENSG00000248923	MTND5P11	mitochondrially encoded NADH:ubiquinone oxidoreductase core subunit 5 pseudogene 11	29.201	5.07766	2.04869	5.8213e-09	8.23498	2.52378	5	134924648	134926459	1						0
ENSG00000257847	LSM3P2	LSM3 homolog, U6 small nuclear RNA and mRNA degradation associated pseudogene 2	21.6841	3.77089	1.98027	1.49683e-07	6.82483	2.52366	12	94590821	94591093	1						0
ENSG00000231007	CDC20P1	cell division cycle 20 pseudogene 1	175.231	30.4961	2.43178	1.42115e-45	44.8474	2.52256	9	87011652	87013151	1						0
ENSG00000242206	RPS26P35	ribosomal protein S26 pseudogene 35	10.8035	1.88258	1.59885	0.000350831	3.4549	2.52072	8	118761856	118762201	1						0
ENSG00000128917	DLL4	delta like canonical Notch ligand 4	10.4683	1.82628	1.63175	0.00019435	3.71141	2.51905	15	40934898	40934921							1
ENSG00000241429	EEF1A1P25	eukaryotic translation elongation factor 1 alpha 1 pseudogene 25	351.633	61.4709	2.45053	1.43383e-68	67.8435	2.5161	3	138825063	138826329	1						0
ENSG00000224834	BTF3P9	basic transcription factor 3 pseudogene 9	182.868	32.0334	2.45435	7.25719e-45	44.1392	2.51316	1	227434064	227434346	1						0
ENSG00000229133	RPS7P4	ribosomal protein S7 pseudogene 4	109.239	19.1395	2.39414	5.1645e-28	27.287	2.51286	1	68242474	68243055	1						0
ENSG00000254012	RPL10P8	ribosomal protein L10 pseudogene 8	281.044	49.4255	2.42512	1.35826e-60	59.867	2.50747	5	171366299	171366611	1						0
ENSG00000251235	SNRPCP2	small nuclear ribonucleoprotein polypeptide C pseudogene 2	10.6912	1.88124	1.54844	0.000398495	3.39958	2.50666	5	76376675	76377149	1						0
ENSG00000242747	AC090515.1	NA	13.0115	2.29168	1.67905	0.00012278	3.91087	2.50531	15	58869659	58870134		1					0
ENSG00000231302	RPL36P2	ribosomal protein L36 pseudogene 2	243.728	42.9467	2.40432	1.17905e-57	56.9285	2.50465	20	50620763	50621077	1						0
ENSG00000226745	AL512599.1	NA	370.321	65.2662	2.46611	7.57776e-82	81.1205	2.50437	1	40132764	40133448		1					0
ENSG00000214199	EEF1A1P12	eukaryotic translation elongation factor 1 alpha 1 pseudogene 12	423.599	74.7624	2.431	1.68713e-77	76.7729	2.50232	2	106697331	106698676	1						0
ENSG00000188064	WNT7B	Wnt family member 7B	14.2461	2.51555	1.80996	1.91875e-05	4.71698	2.50162	22	45950017	45950146							1
ENSG00000179967	PPP1R14BP3	protein phosphatase 1 regulatory inhibitor subunit 14B pseudogene 3	428.719	76.1414	2.43798	1.23553e-89	88.9081	2.49328	4	139114930	139115374	1						0
ENSG00000237828	PA2G4P1	proliferation-associated 2G4 pseudogene 1	106.257	18.8913	2.32209	5.73192e-26	25.2417	2.49176	0	120868611	120869807	1						0
ENSG00000254170	AC008802.1	NA	13.4956	2.39941	1.70786	5.14413e-05	4.28869	2.49173	5	78708734	78709143		1					0
ENSG00000247372	AC008897.2	NA	13.1208	2.34445	1.76613	1.28211e-05	4.89208	2.48453	5	75320155	75320483		1					0
ENSG00000213309	RPL9P18	ribosomal protein L9 pseudogene 18	483.419	86.3981	2.44025	6.21946e-96	95.2062	2.4842	6	63615827	63616361	1						0
ENSG00000213684	LDHBP2	lactate dehydrogenase B pseudogene 2	297.266	53.152	2.41238	2.56294e-74	73.5913	2.48356	0	76334841	76335845	1						0
ENSG00000269982	AC018809.2	NA	25.8345	4.61933	1.97843	4.90768e-08	7.30912	2.48354	3	9958717	9962539		1					0
ENSG00000177685	CRACR2B	calcium release activated channel regulator 2B	95.2161	17.0273	2.34478	6.20729e-24	23.2071	2.48336	11	831535	831780							1
ENSG00000224553	AC008065.1	NA	22.9905	4.11929	2.00182	3.8315e-07	6.41663	2.48057	2	171374931	171375278		1					0
ENSG00000224856	AL035398.1	NA	353.012	63.3703	2.43164	2.79509e-80	79.5536	2.47784	22	43957027	43957348		1					0
ENSG00000261659	Z92544.2	NA	36.5662	6.56747	2.09191	3.36119e-10	9.47351	2.4771	16	692305	692554		1					0
ENSG00000280286	FRG1KP	FSHD region gene 1 family member K, pseudogene	12.9719	2.33958	1.65893	9.2954e-05	4.03173	2.47107	9	65646982	65647018	1						0
ENSG00000213228	RPL12P38	ribosomal protein L12 pseudogene 38	497.921	89.8586	2.44681	4.25295e-102	101.371	2.47019	17	60433723	60434212	1						0
ENSG00000229757	AL031736.2	NA	12.0037	2.16848	1.63158	0.000220027	3.65752	2.46873	1	168578653	168579439		1					0
ENSG00000265646	TUFMP1	Tu translation elongation factor, mitochondrial pseudogene 1	72.8244	13.1855	2.24427	3.16185e-19	18.5001	2.46547	17	27082690	27084036	1						0
ENSG00000267741	UBE2L4	ubiquitin conjugating enzyme E2 L4 (pseudogene)	47.1864	8.55645	2.15228	2.26711e-13	12.6445	2.46329	19	9774497	9774960	1						0
ENSG00000206228	HNRNPA1P4	heterogeneous nuclear ribonucleoprotein A1 pseudogene 4	70.6214	12.8393	2.20495	1.12076e-19	18.9505	2.45954	8	82291624	82292379	1						0
ENSG00000237186	AC092418.1	NA	12.2266	2.23185	1.67703	9.53394e-05	4.02073	2.45371	3	57530345	57530967		1					0
ENSG00000176788	BASP1	brain abundant membrane attached signal protein 1	391.808	71.6235	2.42253	1.61872e-82	81.7908	2.45164	5	17275901	17276834							1
ENSG00000099399	MAGEB2	MAGE family member B2	158.898	29.2718	2.32826	1.12006e-35	34.9508	2.44052	0	30219541	30220089							1
ENSG00000198142	SOWAHC	sosondowah ankyrin repeat domain family member C	136.166	25.1254	2.35159	1.12037e-34	33.9506	2.43815	2	109616068	109618990							1
ENSG00000198658	ABHD17AP1	abhydrolase domain containing 17A pseudogene 1	29.6832	5.4775	2.02607	2.35717e-09	8.62761	2.43806	1	148149161	148149566	1						0
ENSG00000229399	AL592148.1	NA	22.8468	4.22082	1.94971	8.98784e-08	7.04634	2.4364	1	222641414	222641858		1					0
ENSG00000261774	AC009075.2	NA	59.2954	10.9656	2.21868	5.02311e-17	16.299	2.43494	16	72278268	72278568		1					0
ENSG00000225496	AC104651.1	NA	110.172	20.3882	2.25696	3.35365e-27	26.4745	2.43396	2	111940302	111941036		1					0
ENSG00000232823	TXNP1	thioredoxin pseudogene 1	501.017	92.8852	2.39196	3.59732e-102	101.444	2.43134	10	119683127	119683209	1						0
ENSG00000169991 #or# ENSG00000255275 /// ENSG00000179002 #or# ENSG00000255275 /// ENSG00000159423 #or# ENSG00000255275	AL080251.1	aldehyde dehydrogenase 4 family member A1 #or# NA /// intermediate filament family orphan 2 #or# NA /// taste 1 receptor member 2 #or# NA	12.5992	2.33605	1.65571	7.46598e-05	4.12691	2.4312	1	18849273	18849550		1					0
ENSG00000100292	HMOX1	heme oxygenase 1	243.614	45.295	2.35692	1.31309e-46	45.8817	2.42717	22	35389864	35390293							1
ENSG00000239374	AC090013.1	NA	81.6874	15.1926	2.27896	2.65672e-22	21.5757	2.42674	12	116755395	116755874		1					0
ENSG00000257043	AP006296.1	NA	69.3515	12.9129	2.25899	6.14449e-19	18.2115	2.42512	11	18665050	18665548		1					0
ENSG00000142937 #or# ENSG00000207421 #or# ENSG00000281859	SNORD38B	ribosomal protein S8 #or# small nucleolar RNA, C/D box 38B #or# small nucleolar RNA, C/D box 38B	11.3272	2.11085	1.46205	0.000989062	3.00478	2.4239	1	44778390	44778458					1		0
ENSG00000243431	RPL5P30	ribosomal protein L5 pseudogene 30	10.6921	1.99738	1.54808	0.000431325	3.3652	2.42036	11	118560690	118561580	1						0
ENSG00000260747	AC022968.1	NA	24.7123	4.62419	1.95773	5.81044e-08	7.23579	2.41795	18	68277802	68278243		1					0
ENSG00000247627 /// ENSG00000198868 #or# ENSG00000247627	MTND4P12	mitochondrially encoded NADH:ubiquinone oxidoreductase core subunit 4L pseudogene 30 #or# mitochondrially encoded NADH:ubiquinone oxidoreductase core subunit 4 pseudogene 12 /// mitochondrially encoded NADH:ubiquinone oxidoreductase core subunit 4 pseudogene 12	268.054	50.1834	2.23828	2.66217e-22	21.5748	2.41724	5	134926660	134928036	1						0
ENSG00000226284	ARPC3P1	actin related protein 2/3 complex subunit 3 pseudogene 1	29.5343	5.53113	1.94891	1.20331e-08	7.91962	2.41674	20	49134480	49135012	1						0
ENSG00000219149	PPIAP87	peptidylprolyl isomerase A pseudogene 87	156.765	29.4162	2.30462	4.63762e-37	36.3337	2.41392	9	76549282	76549771	1						0
ENSG00000224858	RPL29P11	ribosomal protein L29 pseudogene 11	827.894	155.464	2.37889	1.59863e-139	138.796	2.41286	3	37016523	37017014	1						0
ENSG00000141526	SLC16A3	solute carrier family 16 member 3	30.3576	5.71197	2.01778	4.15198e-09	8.38174	2.41	17	82261096	82261129							1
ENSG00000263366	ABHD17AP5	abhydrolase domain containing 17A pseudogene 5	18.1697	3.42249	1.76584	5.88186e-06	5.23049	2.40841	22	22114844	22115245	1						0
ENSG00000213189	BTF3L4P2	basic transcription factor 3 like 4 pseudogene 2	85.4308	16.1066	2.25637	1.06176e-23	22.974	2.4071	2	159003975	159004320	1						0
ENSG00000285407	AL033530.1	NA	23.3288	4.40166	1.96222	2.33717e-07	6.63131	2.40599	1	68882943	68883459		1					0
ENSG00000258895	AC104390.1	NA	28.4151	5.36356	1.96584	8.08759e-09	8.09218	2.40539	15	94033658	94034177		1					0
ENSG00000214121	PRDX1P1	peroxiredoxin 1 pseudogene 1	564.381	106.628	2.37266	2.52301e-94	93.5981	2.40409	9	12972843	12973438	1						0
ENSG00000213801 /// ENSG00000213801 #or# ENSG00000221874	ZNF321P	zinc finger protein 321, pseudogene /// zinc finger protein 321, pseudogene #or# ZNF816-ZNF321P readthrough	23.8515	4.50806	1.88142	6.11365e-07	6.2137	2.4035	19	52928903	52929397	1						0
ENSG00000213509	PPIAP16	peptidylprolyl isomerase A pseudogene 16	193.361	36.701	2.29797	1.15538e-45	44.9373	2.3974	3	57941818	57942304	1						0
ENSG00000226970	AL450063.1	NA	73.4322	13.9909	2.22396	3.49145e-19	18.457	2.39192	1	84244334	84244577		1					0
ENSG00000232905	AL162393.1	NA	26.0552	4.96773	1.94387	6.0906e-08	7.21534	2.39091	9	113850687	113851632		1					0
ENSG00000242477	AC091429.1	NA	547.94	104.559	2.33345	9.35024e-93	92.0292	2.3897	5	86884231	86884881		1					0
ENSG00000217416	ISCA1P1	iron-sulfur cluster assembly 1 pseudogene 1	38.5108	7.36581	2.08699	1.17561e-11	10.9297	2.38635	5	62776877	62777263	1						0
ENSG00000253421	ZNHIT1P1	zinc finger HIT-type containing 1 pseudogene 1	30.9957	5.93584	2.02406	1.36223e-09	8.86575	2.38455	8	142858354	142858797	1						0
ENSG00000238287	AL603839.3	NA	23.5172	4.50939	1.9423	1.90142e-07	6.72092	2.38271	1	40493157	40493688		1					0
ENSG00000215237	AL592293.1	NA	14.88	2.85909	1.72807	4.22314e-05	4.37436	2.37975	9	15019485	15019729		1					0
ENSG00000225591	BX248409.1	NA	125.094	24.0385	2.26171	2.30308e-30	29.6377	2.37959	1	173741674	173741928		1					0
ENSG00000234825	XRCC6P2	X-ray repair cross complementing 6 pseudogene 2	154.111	29.6259	2.26872	7.51592e-37	36.124	2.37903	0	150231075	150232896	1						0
ENSG00000238137	ARPC3P2	actin related protein 2/3 complex subunit 3 pseudogene 2	24.9351	4.7975	1.87676	1.93678e-07	6.71292	2.37782	1	211442274	211442806	1						0
ENSG00000213793	ZNF888	zinc finger protein 888	43.2152	8.33745	2.04818	2.66816e-11	10.5738	2.37386	19	52908169	52908179							1
ENSG00000237039	AC018738.1	NA	2292.2	443.208	2.34769	9.85402e-203	202.006	2.37068	2	231256097	231256306		1					0
ENSG00000230584	CCT5P2	chaperonin containing TCP1 subunit 5 pseudogene 2	73.4657	14.221	2.22608	4.66994e-19	18.3307	2.36905	13	78908919	78910542	1						0
ENSG00000204267 #or# ENSG00000250264 /// ENSG00000204267	TAP2	transporter 2, ATP binding cassette subfamily B member #or# NA /// transporter 2, ATP binding cassette subfamily B member	248.472	48.1457	2.32089	1.38095e-57	56.8598	2.3676	6	32832295	32832461							1
ENSG00000232368	FTLP2	ferritin light chain pseudogene 2	306.117	59.3162	2.31766	5.02042e-67	66.2993	2.36758	0	30630298	30630825	1						0
ENSG00000241932	AC092324.1	NA	378.927	73.4521	2.30177	6.68841e-61	60.1747	2.36704	16	12881170	12881493		1					0
ENSG00000230207	RPL4P5	ribosomal protein L4 pseudogene 5	627.638	121.759	2.32907	7.26813e-115	114.139	2.36591	9	7477045	7478320	1						0
ENSG00000244043	RPS27P27	ribosomal protein S27 pseudogene 27	193.783	37.6212	2.28377	1.39841e-44	43.8544	2.36483	16	59088837	59089091	1						0
ENSG00000255059	PPIAP43	peptidylprolyl isomerase A pseudogene 43	55.1877	10.7214	2.11926	2.72197e-15	14.5651	2.36385	11	100666459	100666962	1						0
ENSG00000235256	FKBP4P7	FK506 binding protein 4 pseudogene 7	10.8784	2.11571	1.46829	0.000942208	3.02585	2.36225	9	62710036	62711398	1						0
ENSG00000228797	FAM207BP	family with sequence similarity 207 member B, pseudogene	102.108	19.917	2.21898	7.79284e-26	25.1083	2.35802	13	18697003	18697507	1						0
ENSG00000230067	HSPD1P6	heat shock protein family D (Hsp60) member 1 pseudogene 6	28.0778	5.4797	1.92437	2.59408e-08	7.58602	2.35726	3	36768725	36769260	1						0
ENSG00000283041 #or# ENSG00000284135	MIR3654	NA #or# microRNA 3654	1352.17	264.307	2.32745	6.64135e-200	199.178	2.35499	7	133034860	133034915				1			0
ENSG00000176043	AC007160.1	NA	1053	205.946	2.33391	1.08372e-167	166.965	2.35417	14	72929612	72929930		1					0
ENSG00000213750	AP002982.1	NA	1330.6	260.465	2.3421	3.00577e-225	224.522	2.35291	8	97624203	97625079		1					0
ENSG00000241723	AC074276.1	NA	19.4761	3.82232	1.76157	2.64999e-06	5.57676	2.34918	3	158275809	158276421		1					0
ENSG00000168874	ATOH8	atonal bHLH transcription factor 8	11.3303	2.22831	1.58211	0.000337419	3.47183	2.34616	2	85786885	85788039							1
ENSG00000237701	ATP5PFP1	ATP synthase peripheral stalk subunit F6 pseudogene 1	479.788	94.8185	2.29276	3.63302e-92	91.4397	2.33915	0	6901147	6901372	1						0
ENSG00000248988	AC093700.1	NA	40.6792	8.05021	2.03461	1.17881e-11	10.9286	2.33719	4	159007119	159007835		1					0
ENSG00000259516	ANP32AP1	acidic nuclear phosphoprotein 32 family member A pseudogene 1	60.7133	12.0198	2.03889	7.7132e-14	13.1128	2.3366	15	35237326	35238062	1						0
ENSG00000256356	HSPA8P5	heat shock protein family A (Hsp70) member 8 pseudogene 5	32.5978	6.45534	1.98331	7.09346e-09	8.14914	2.33621	12	4097451	4099519	1						0
ENSG00000234969 /// ENSG00000225470 #or# ENSG00000234969 /// ENSG00000225470 #or# ENSG00000274430 /// ENSG00000225470 #or# ENSG00000276784 /// as__ENSG00000225470 #or# as__ENSG00000276784	AL627389.1	NA /// JPX transcript, XIST activator (non-protein coding) #or# NA	23.3288	4.62153	1.79451	1.03187e-06	5.98638	2.33567	0	74070433	74070832		1					0
ENSG00000234031	RPS3AP44	ribosomal protein S3a pseudogene 44	270.004	53.5643	2.28116	2.91782e-60	59.5349	2.33364	13	26576886	26577675	1						0
ENSG00000132010 #or# ENSG00000213297	ZNF625-ZNF20	zinc finger protein 20 #or# ZNF625-ZNF20 readthrough (NMD candidate)	12.6741	2.51555	1.59084	0.000255119	3.59326	2.33294	19	12140217	12140325							1
ENSG00000232083	RPL31P7	ribosomal protein L31 pseudogene 7	148.611	29.5266	2.23657	1.99733e-35	34.6995	2.33145	17	80602549	80602926	1						0
ENSG00000101278	RPS10P5	ribosomal protein S10 pseudogene 5	20.3755	4.05192	1.7535	5.87907e-06	5.23069	2.33016	20	839447	839977	1						0
ENSG00000120451	SNX19	sorting nexin 19	78.511	15.6399	2.12966	3.54241e-18	17.4507	2.32766	11	130910308	130910370							1
ENSG00000239830	RPS4XP22	ribosomal protein S4X pseudogene 22	873.174	173.966	2.29475	4.02629e-149	148.395	2.32746	19	9683294	9684073	1						0
ENSG00000125740	FOSB	FosB proto-oncogene, AP-1 transcription factor subunit	22.3597	4.45663	1.92226	7.05653e-08	7.15141	2.32688	19	45472551	45473067							1
ENSG00000241556	AC018475.1	NA	63.2574	12.6925	2.15544	3.77106e-17	16.4235	2.31725	12	95467397	95467861		1					0
ENSG00000219863	RPL31P28	ribosomal protein L31 pseudogene 28	23.5172	4.72926	1.78112	1.53576e-06	5.81368	2.31403	6	53354715	53355065	1						0
ENSG00000254132	MTND6P3	mitochondrially encoded NADH:ubiquinone oxidoreductase core subunit 6 pseudogene 3	16.4145	3.30415	1.67978	2.11897e-05	4.67388	2.31262	5	94568929	94569470	1						0
ENSG00000213729	AC098828.1	NA	223.544	45.132	2.12641	4.22999e-18	17.3737	2.30833	2	20155618	20156057		1					0
ENSG00000256843	AC023157.2	NA	16.1136	3.25625	1.65741	6.54196e-05	4.18429	2.307	12	31748100	31748240		1					0
ENSG00000255807	PTP4A1P2	protein tyrosine phosphatase type IVA, member 1 pseudogene 2	32.1128	6.50544	1.93735	2.40204e-09	8.61942	2.30343	12	133033503	133033956	1						0
ENSG00000214855	APOC1P1	apolipoprotein C1 pseudogene 1	50.4709	10.2262	2.10026	1.40393e-13	12.8527	2.30318	19	44931000	44931058	1						0
ENSG00000279483	AC090498.1	NA	2095.08	425.024	2.17941	3.15352e-27	26.5012	2.30139	7	137513859	137513933		1					0
ENSG00000213862	AC044787.1	NA	1405.83	285.228	2.28006	1.65106e-207	206.782	2.30123	15	47730144	47730935		1					0
ENSG00000189221	MAOA	monoamine oxidase A	43.3267	8.79359	1.99555	2.84039e-10	9.54662	2.30073	0	43744367	43744658							1
ENSG00000213569	AL390039.1	NA	151.939	30.8409	2.22368	9.02987e-37	36.0443	2.30058	0	107131659	107132269		1					0
ENSG00000214362	RPS3AP36	ribosomal protein S3a pseudogene 36	15.4776	3.14499	1.70637	3.07082e-05	4.51275	2.29906	10	95594598	95595372	1						0
ENSG00000238098	ABCA17P	ATP binding cassette subfamily A member 17, pseudogene	14.2805	2.90785	1.54283	0.000181876	3.74022	2.29602	16	2425559	2425685	1						0
ENSG00000234639	AC009263.1	NA	16.2625	3.31255	1.69735	2.87101e-05	4.54197	2.29553	7	138023559	138024339		1					0
ENSG00000229037	BX323845.3	NA	21.5686	4.39813	1.77411	8.3049e-06	5.08067	2.29397	0	53808389	53808623		1					0
ENSG00000229107	ABHD17AP4	abhydrolase domain containing 17A pseudogene P4	12.0381	2.45705	1.6185	0.000154631	3.8107	2.29261	22	20667836	20668220	1						0
ENSG00000226608	FTLP3	ferritin light chain pseudogene 3	418.53	85.5064	2.24316	1.07575e-82	81.9683	2.29123	20	4023917	4024444	1						0
ENSG00000230580	AC021016.1	NA	1044.7	213.599	2.26382	4.58945e-149	148.338	2.29012	2	218354075	218354572		1					0
ENSG00000270804	AC010326.4	NA	59.1404	12.1088	2.08202	1.52405e-13	12.817	2.28809	19	57868790	57868834		1					0
ENSG00000129682	FGF13	fibroblast growth factor 13	10.5828	2.16848	1.47799	0.000967163	3.0145	2.28697	0	138857642	138857679							1
ENSG00000241739	AC010469.2	NA	20.6014	4.22569	1.8298	1.60139e-06	5.7955	2.28548	5	31840492	31840971		1					0
ENSG00000242169	AC093789.1	NA	20.2641	4.15746	1.75392	3.3237e-06	5.47838	2.28515	4	188349376	188350024		1					0
ENSG00000276380	UBE2NL	ubiquitin conjugating enzyme E2 N like (gene/pseudogene)	18.0957	3.71459	1.75482	6.65969e-06	5.17655	2.28437	0	143884563	143885255	1						0
ENSG00000170608	FOXA3	forkhead box A3	12.5274	2.57272	1.52403	0.00038188	3.41807	2.28372	19	45873059	45873797							1
ENSG00000267541	MTCO2P2	mitochondrially encoded cytochrome c oxidase II pseudogene 2	725.145	148.952	2.17299	8.308e-31	30.0805	2.28342	18	47853233	47853457	1						0
ENSG00000214434	NIFKP1	nucleolar protein interacting with the FHA domain of MKI67 pseudogene 1	10.841	2.22831	1.46637	0.000884876	3.05312	2.28247	10	30380174	30381062	1						0
ENSG00000225662	AC012519.1	NA	10.282	2.11351	1.48291	0.00100471	2.99796	2.2824	3	62779176	62779785		1					0
ENSG00000198633	ZNF534	zinc finger protein 534	34.1344	7.01741	1.90969	3.01909e-09	8.52012	2.28222	19	52451498	52451939							1
ENSG00000254406	AP001994.1	NA	51.3715	10.5622	2.04848	2.85682e-13	12.5441	2.28205	11	119821304	119822129		1					0
ENSG00000260668	AC093536.1	NA	11.4021	2.34445	1.54865	0.00037209	3.42935	2.28198	16	64260570	64261019		1					0
ENSG00000214192	UBE2V1P2	ubiquitin conjugating enzyme E2 V1 pseudogene 2	10.8035	2.22478	1.49735	0.000525098	3.27976	2.27977	3	175718231	175718670	1						0
ENSG00000249395	CASC9	cancer susceptibility 9 (non-protein coding)	12.1891	2.51068	1.54068	0.000368376	3.43371	2.27944	8	75223898	75224358							1
ENSG00000198576	ARC	activity regulated cytoskeleton associated protein	98.4745	20.2849	2.1889	6.51029e-24	23.1864	2.27934	8	142612065	142612252							1
ENSG00000235547	NDUFB11P1	NADH:ubiquinone oxidoreductase subunit B11 pseudogene 1	106.924	22.0398	2.13665	4.01256e-26	25.3966	2.27841	11	92336032	92336496	1						0
ENSG00000244705	AC020658.1	NA	15.1829	3.13878	1.62722	5.3496e-05	4.27168	2.27417	15	40312352	40313289		1					0
ENSG00000277991	FP236241.1	NA	47.4415	9.81799	2.01514	4.5297e-12	11.3439	2.27265	21	7673217	7673264		1					0
ENSG00000257872	AC233290.1	NA	18.7713	3.88569	1.76175	6.28689e-06	5.20156	2.27229	12	76137425	76138610		1					0
ENSG00000270706	PRMT1P1	protein arginine methyltransferase 1 pseudogene 1	58.6238	12.1536	2.01743	2.20824e-15	14.656	2.27011	5	177265580	177266588	1						0
ENSG00000259838	ELOCP2	elongin C pseudogene 2	91.9298	19.0672	2.10649	5.23127e-22	21.2814	2.26944	15	41557246	41557435	1						0
ENSG00000243023	UBA52P3	ubiquitin A-52 residue ribosomal protein fusion product 1 pseudogene 3	114.181	23.7301	2.13217	1.78958e-24	23.7472	2.26654	14	58141279	58141660	1						0
ENSG00000250672	AC010343.2	NA	15.6234	3.25625	1.57569	0.000139765	3.8546	2.26243	5	33090126	33090349		1					0
ENSG00000198618	PPIAP22	peptidylprolyl isomerase A pseudogene 22	2071.03	431.701	2.24506	1.45346e-223	222.838	2.26224	21	18857779	18858276	1						0
ENSG00000233476	EEF1A1P6	eukaryotic translation elongation factor 1 alpha 1 pseudogene 6	1885.14	393.444	2.24397	3.18871e-233	232.496	2.26045	7	22510616	22511999	1						0
ENSG00000228364	SAR1AP1	secretion associated Ras related GTPase 1A pseudogene 1	19.1805	4.00536	1.75557	8.13023e-06	5.0899	2.25964	6	29076573	29077168	1						0
ENSG00000140465	CYP1A1	cytochrome P450 family 1 subfamily A member 1	19.8905	4.16366	1.79227	4.04201e-06	5.3934	2.25615	15	74722315	74722534							1
ENSG00000250329	KDELC1P1	KDEL motif containing 1 pseudogene 1	10.3194	2.16848	1.49111	0.000509767	3.29263	2.25061	5	128109486	128110994	1						0
ENSG00000216676	AL031229.1	NA	743.064	156.295	2.22862	3.47877e-132	131.459	2.24922	6	27652602	27652825		1					0
ENSG00000233055	AL353621.1	NA	28.6776	6.04977	1.92878	2.50312e-08	7.60152	2.24497	9	101501643	101501885		1					0
ENSG00000243445	AC106820.1	NA	313.67	66.2041	2.16135	1.43279e-54	53.8438	2.24426	16	2332313	2332732		1					0
ENSG00000175592	FOSL1	FOS like 1, AP-1 transcription factor subunit	36.1914	7.63891	1.92949	4.85041e-09	8.31422	2.24421	11	65893042	65893296							1
ENSG00000231093	AL391256.1	NA	10.2445	2.16361	1.39352	0.00148998	2.82682	2.24334	0	145632271	145632375		1					0
ENSG00000230779	AL161636.2	NA	344.071	72.7419	2.2019	3.35465e-68	67.4744	2.24185	1	153225080	153226006		1					0
ENSG00000164002	EXO5	exonuclease 5	72.8628	15.4068	2.05772	4.09876e-17	16.3873	2.24162	1	40514515	40514623							1
ENSG00000227968	BUB3P1	BUB3 mitotic checkpoint protein pseudogene 1	20.7899	4.403	1.8661	8.45269e-07	6.07301	2.23932	7	108994031	108995029	1						0
ENSG00000006016	CRLF1	cytokine receptor like factor 1	36.6432	7.76918	1.98266	3.19836e-10	9.49507	2.23771	19	18599700	18599846							1
ENSG00000227887	RPS26P13	ribosomal protein S26 pseudogene 13	38.5421	8.20718	1.87511	4.55826e-09	8.3412	2.23148	1	208697369	208697698	1						0
ENSG00000213979	RPL7AP14	ribosomal protein L7a pseudogene 14	64.7971	13.8123	2.02649	6.49042e-15	14.1877	2.22998	20	37444733	37445534	1						0
ENSG00000215003	RPL15P20	ribosomal protein L15 pseudogene 20	14.7292	3.14145	1.58864	0.000192286	3.71605	2.22918	16	15931697	15932294	1						0
ENSG00000258357	AC023161.2	NA	45.7624	9.76036	1.9704	5.9103e-12	11.2284	2.22916	12	94521090	94521869		1					0
ENSG00000237973	MTCO1P12	mitochondrially encoded cytochrome c oxidase I pseudogene 12	2808.09	599.642	2.12301	3.10876e-28	27.5074	2.22742	1	631074	632616	1						0
ENSG00000233028	AC006970.2	NA	18.3934	3.93006	1.63131	3.18315e-05	4.49714	2.22657	7	56175634	56176412		1					0
ENSG00000273706	LHX1	LIM homeobox 1	60.3812	12.9102	2.04938	2.57608e-15	14.589	2.22559	17	36943598	36943685							1
ENSG00000277491	AC087392.5	NA	15.2194	3.25625	1.6451	7.54912e-05	4.1221	2.22463	17	795306	795794		1					0
ENSG00000227063	RPL41P1	ribosomal protein L41 pseudogene 1	1992.88	426.572	2.09583	1.77508e-23	22.7508	2.22399	20	21755270	21755350	1						0
ENSG00000178773	CPNE7	copine 7	100.792	21.5833	2.11016	1.04623e-22	21.9804	2.22339	16	89596484	89596845							1
ENSG00000274641	HIST1H2BO	histone cluster 1 H2B family member o	10.0926	2.16848	1.3716	0.00189293	2.72287	2.21854	6	27893841	27893843							1
ENSG00000260240	APOOP5	apolipoprotein O pseudogene 5	20.1892	4.34536	1.78185	2.08057e-06	5.68182	2.21603	16	59754461	59755026	1						0
ENSG00000092969 #or# ENSG00000281453 /// ENSG00000092969	TGFB2	transforming growth factor beta 2 #or# TGFB2 overlapping transcript 1 /// transforming growth factor beta 2	10.8431	2.33825	1.38587	0.00171038	2.76691	2.21328	1	218441204	218442141							1
ENSG00000239256	RPL35AP35	ribosomal protein L35a pseudogene 35	182.301	39.3565	2.14736	6.48068e-37	36.1884	2.21165	17	29340482	29340822	1						0
ENSG00000227854	AL590135.1	NA	59.1518	12.7835	2.02987	1.62476e-14	13.7892	2.21014	1	239052748	239052903		1					0
ENSG00000232777	MRPL51P2	mitochondrial ribosomal protein L51 pseudogene 2	17.3848	3.76382	1.68863	1.37979e-05	4.86019	2.20755	21	43115334	43115709	1						0
ENSG00000235816	PRELID1P3	PRELI domain containing 1 pseudogene 3	13.9827	3.02752	1.51824	0.000246116	3.60886	2.20744	10	63427297	63427939	1						0
ENSG00000172638	EFEMP2	EGF containing fibulin extracellular matrix protein 2	17.9489	3.88702	1.72754	2.43148e-05	4.61413	2.20716	11	65871416	65872018							1
ENSG00000270945	HSPE1P7	heat shock protein family E (Hsp10) member 1 pseudogene 7	116.567	25.2592	2.10482	2.37807e-25	24.6238	2.20628	16	74612596	74612882	1						0
ENSG00000120055	C10orf95	chromosome 10 open reading frame 95	16.5591	3.59626	1.54526	0.000193681	3.71291	2.20305	10	102449837	102450451							1
ENSG00000253223	AC110998.1	NA	12.1121	2.63168	1.45536	0.000999095	3.00039	2.20239	8	66984135	66986187		1					0
ENSG00000233929	MT1XP1	metallothionein 1X pseudogene 1	32.7144	7.12734	1.77807	9.93442e-08	7.00286	2.19849	1	16241213	16241398	1						0
ENSG00000105750	ZNF85	zinc finger protein 85	21.2344	4.62906	1.76285	5.18349e-06	5.28538	2.19761	19	20948744	20950697							1
ENSG00000232172	AL359092.2	NA	20.1861	4.40166	1.72581	8.03994e-06	5.09475	2.19724	9	130651799	130652383		1					0
ENSG00000184838	PRR16	proline rich 16	32.1908	7.02714	1.88024	1.05018e-08	7.97874	2.19564	5	120686710	120686925							1
ENSG00000183586	HMGN3P1	high mobility group nucleosomal binding domain 3 pseudogene 1	10.9898	2.40075	1.47462	0.000655017	3.18375	2.19461	1	152399577	152399769	1						0
ENSG00000284670	AC092128.1	NA	126.19	27.5891	2.10247	6.49102e-26	25.1877	2.19343	16	73941412	73941781		1					0
ENSG00000253683	AC027309.2	NA	1641.91	359.848	2.17643	1.60165e-213	212.795	2.18992	5	172656522	172656713		1					0
ENSG00000214259	AC018695.1	NA	14.8447	3.25625	1.64017	4.93221e-05	4.30696	2.18866	16	85815873	85816536		1					0
ENSG00000226421	SLC25A5P5	solute carrier family 25 member 5 pseudogene 5	38.2099	8.39595	1.89308	1.40908e-10	9.85107	2.18618	7	32471513	32472409	1						0
ENSG00000250982	GAPDHP35	glyceraldehyde 3 phosphate dehydrogenase pseudogene 35	49.3152	10.8446	1.9469	1.1743e-12	11.9302	2.18506	16	28239693	28240668	1						0
ENSG00000213177	PRDX2P4	peroxiredoxin 2 pseudogene 4	52.1199	11.474	1.95899	4.62508e-13	12.3349	2.18346	6	100136064	100136663	1						0
ENSG00000183508	TENT5C	terminal nucleotidyltransferase 5C	67.8971	14.9506	2.0082	2.37055e-17	16.6252	2.18315	1	117624045	117628372							1
ENSG00000136997	MYC	MYC proto-oncogene, bHLH transcription factor	2461.58	544.923	2.16908	3.58958e-257	256.445	2.17546	8	127740956	127740958							1
ENSG00000239719	AC004890.1	NA	460.986	102.113	2.1209	2.87234e-72	71.5418	2.17456	7	149191043	149191223		1					0
as__ENSG00000179406 #or# as__ENSG00000244510 /// as__ENSG00000179406 #or# as__ENSG00000230189 /// ENSG00000179406 #or# ENSG00000244657 /// ENSG00000179406 #or# ENSG00000230189 /// ENSG00000179406 #or# ENSG00000231234 /// ENSG00000179406	LINC00174	long intergenic non-protein coding RNA 174 /// long intergenic non-protein coding RNA 174 #or# S-phase kinase associated protein 1 pseudogene 1 /// long intergenic non-protein coding RNA 174 #or# NA	339.988	75.3185	2.14823	1.9515e-64	63.7096	2.17441	7	66492009	66492339			1				0
ENSG00000235808	MYL6P2	myosin light chain 6 pseudogene 2	23.7036	5.2523	1.73934	8.42934e-07	6.07421	2.17408	21	39488327	39488760	1						0
ENSG00000235828	RPL36AP26	ribosomal protein L36a pseudogene 26	505.179	112.229	2.11058	8.13e-66	65.0899	2.17035	7	15701435	15701752	1						0
ENSG00000254332	AF201337.1	NA	18.5049	4.11309	1.6631	1.3055e-05	4.88422	2.16961	8	69129598	69130345		1					0
ENSG00000216938	RPL7P58	ribosomal protein L7 pseudogene 58	35.6698	7.93541	1.8722	7.36545e-09	8.1328	2.16833	0	26687363	26687955	1						0
ENSG00000117318	ID3	inhibitor of DNA binding 3, HLH protein	1138.87	253.461	2.15692	5.92821e-150	149.227	2.16777	1	23558445	23559019							1
ENSG00000197747	S100A10	S100 calcium binding protein A10	3429.62	764.434	2.1548	9.47977e-253	252.023	2.16559	1	151985158	151985335							1
ENSG00000231333	RPL34P6	ribosomal protein L34 pseudogene 6	388.253	86.5577	2.11862	6.19754e-66	65.2078	2.16526	1	200863808	200864152	1						0
ENSG00000182718	ANXA2	annexin A2	2151.68	479.915	2.15687	1.81796e-243	242.74	2.16461	15	60395907	60396427							1
ENSG00000109452	INPP4B	inositol polyphosphate-4-phosphatase type II B	12.0381	2.68532	1.42951	0.000902217	3.04469	2.16445	4	142795152	142795613							1
ENSG00000233527	ZNF529-AS1	ZNF529 antisense RNA 1	15.5921	3.48365	1.59615	9.31618e-05	4.03076	2.16214	19	36594401	36594708							1
ENSG00000231300	EZH2P1	enhancer of zeste 2 polycomb repressive complex 2 subunit pseudogene 1	15.0675	3.36752	1.60634	4.15713e-05	4.38121	2.16168	21	35599732	35600022	1						0
ENSG00000230392	AC004835.1	NA	13.5705	3.03372	1.63842	2.76313e-05	4.5586	2.16131	0	119333050	119335610		1					0
ENSG00000228232	GAPDHP1	glyceraldehyde-3-phosphate dehydrogenase pseudogene 1	105.136	23.5393	2.05653	2.75839e-23	22.5593	2.15911	0	39787132	39788136	1						0
ENSG00000145632	PLK2	polo like kinase 2	49.4266	11.0733	1.93747	3.37805e-12	11.4713	2.1582	5	58458865	58459092							1
ENSG00000213695	RPS7P14	ribosomal protein S7 pseudogene 14	29.0877	6.51871	1.88779	1.80267e-08	7.74408	2.15775	0	74409518	74410100	1						0
ENSG00000227177	AIMP1P2	aminoacyl tRNA synthetase complex interacting multifunctional protein 1 pseudogene 2	16.0043	3.58785	1.61909	4.34115e-05	4.3624	2.15727	1	172885947	172886258	1						0
ENSG00000105063	PPP6R1	protein phosphatase 6 regulatory subunit 1	24.8976	5.5967	1.67824	1.56831e-06	5.80457	2.15336	19	55247104	55247109							1
ENSG00000262967	AC005921.2	NA	25.9469	5.8365	1.79809	7.17367e-07	6.14426	2.15238	17	50695360	50695449		1					0
ENSG00000240125	RPL23AP75	ribosomal protein L23a pseudogene 75	21.5352	4.84539	1.6608	5.90993e-06	5.22842	2.15201	17	40439467	40439917	1						0
ENSG00000215210	RBMXP2	RBMX pseudogene 2	13.6828	3.08515	1.498	0.00038223	3.41767	2.14895	9	30689105	30690272	1						0
ENSG00000230721	AL049597.1	NA	44.2301	9.98022	1.83551	2.47689e-10	9.60609	2.14788	1	86784913	86785467		1					0
ENSG00000230993	RPL12P15	ribosomal protein L12 pseudogene 15	36.1914	8.16635	1.8683	7.03768e-10	9.15257	2.14788	2	121658475	121658973	1						0
ENSG00000175886	RPL7AP66	ribosomal protein L7a pseudogene 66	840.913	189.753	2.127	1.58408e-145	144.8	2.14783	18	39334872	39335672	1						0
ENSG00000242692	RPS27AP1	ribosomal protein S27a pseudogene 1	581.695	131.327	2.12166	8.05809e-95	94.0938	2.1471	17	10258762	10259232	1						0
ENSG00000258965	AC044913.1	NA	18.433	4.16232	1.62955	4.34415e-05	4.36209	2.14683	15	25928146	25928575		1					0
ENSG00000131378	RFTN1	raftlin, lipid raft linker 1	56.414	12.7404	1.96483	2.19608e-13	12.6584	2.14664	3	16493870	16493877							1
ENSG00000121716	PILRB	paired immunoglobin-like type 2 receptor beta	14.879	3.36619	1.42077	0.000864057	3.06346	2.14409	7	100367378	100367398							1
ENSG00000248546	ANP32C	acidic nuclear phosphoprotein 32 family member C	135.232	30.6149	1.84951	9.7964e-10	9.00893	2.14313	4	164197007	164197711							1
ENSG00000219986	BTF3P7	basic transcription factor 3 pseudogene 7	344.075	77.9052	2.08698	1.72076e-63	62.7643	2.14293	6	6794915	6795402	1						0
ENSG00000250273	PSMC1P5	proteasome 26S subunit, ATPase 1 pseudogene 5	32.525	7.36581	1.8241	8.9991e-09	8.0458	2.14263	5	107195156	107195332	1						0
ENSG00000224126	UBE2SP2	ubiquitin conjugating enzyme E2 S pseudogene 2	300.773	68.1177	2.09727	2.28898e-59	58.6404	2.14257	17	18677261	18677757	1						0
ENSG00000224891	AC007899.1	NA	12.3359	2.79438	1.4193	0.000947878	3.02325	2.14226	2	37148530	37149304		1					0
ENSG00000117148	ACTL8	actin like 8	14.395	3.26112	1.6199	7.67504e-05	4.11492	2.14212	1	17826520	17827061							1
ENSG00000146215	CRIP3	cysteine rich protein 3	40.5637	9.18989	1.90794	2.80487e-10	9.55209	2.14207	6	43307503	43307743							1
ENSG00000233229	CNOT7P1	CCR4-NOT transcription complex subunit 7 pseudogene 1	12.8595	2.91405	1.52209	0.000241175	3.61767	2.14174	0	69937166	69938017	1						0
ENSG00000167552	TUBA1A	tubulin alpha 1a	2988.63	677.405	2.14037	3.02963e-302	301.519	2.14139	12	49186732	49186833							1
ENSG00000213935	RPL22P16	ribosomal protein L22 pseudogene 16	121.548	27.7106	1.90371	2.68106e-13	12.5717	2.13302	7	4865432	4865804	1						0
ENSG00000244490	RWDD4P1	RWD domain containing 4 pseudogene 1	13.533	3.09002	1.56452	0.000184003	3.73518	2.1308	7	105301522	105302086	1						0
ENSG00000179997	AC010894.1	NA	33.1997	7.58748	1.84488	8.70117e-09	8.06042	2.12948	2	174501952	174502312		1					0
ENSG00000166847 #or# ENSG00000260482	AC008870.1	dynactin subunit 5 #or# NA	15.2173	3.48012	1.58447	7.67652e-05	4.11484	2.1285	16	23675194	23675499		1					0
ENSG00000267260	AC020928.2	NA	37.2731	8.52582	1.91406	6.57317e-09	8.18222	2.12822	19	36775386	36775711		1					0
ENSG00000241104 /// ENSG00000183668 #or# ENSG00000241104	CEACAMP10	carcinoembryonic antigen related cell adhesion molecule pseudogene 10 /// pregnancy specific beta-1-glycoprotein 9 #or# carcinoembryonic antigen related cell adhesion molecule pseudogene 10	18.4705	4.22923	1.72832	2.16162e-06	5.66522	2.12676	19	43219988	43220242	1						0
ENSG00000167371 #or# ENSG00000280607 /// ENSG00000167371 #or# ENSG00000280893 /// as__ENSG00000167371 #or# as__ENSG00000280893 /// ENSG00000167371 #or# ENSG00000280607 #or# ENSG00000280893 /// ENSG00000103495 #or# ENSG00000280607	AC009133.5	MYC associated zinc finger protein #or# NA /// proline rich transmembrane protein 2 #or# NA /// proline rich transmembrane protein 2 #or# NA #or# NA	23.9285	5.4797	1.67918	7.16438e-06	5.14482	2.12656	16	29811969	29812227		1					0
ENSG00000217648	AL136116.3	NA	11.4395	2.61975	1.40864	0.00107051	2.97041	2.12653	6	143342246	143343383		1					0
ENSG00000196924	FLNA	filamin A	2389.08	547.401	2.10321	5.35239e-119	118.271	2.12578	0	154364632	154364957							1
ENSG00000235962	RPL7AP53	ribosomal protein L7a pseudogene 53	21.1656	4.85513	1.70941	9.5739e-06	5.01891	2.12414	10	33057615	33058407	1						0
ENSG00000227309	AC140076.1	NA	75.6694	17.3668	1.98655	3.26739e-17	16.4858	2.12337	3	17465150	17465510		1					0
ENSG00000231120	BTF3P10	basic transcription factor 3 pseudogene 10	10.2049	2.34311	1.33811	0.0021792	2.6617	2.12277	6	149977922	149978416	1						0
ENSG00000273748	AL592183.1	NA	27.5958	6.33874	1.74186	5.33441e-07	6.27291	2.12218	2191	54224	54226		1					0
ENSG00000137331	IER3	immediate early response 3	169.889	39.1779	2.03978	1.44763e-37	36.8393	2.11648	6	30743199	30743935							1
ENSG00000242222	AC092989.1	NA	27.218	6.2851	1.75529	2.74893e-07	6.56084	2.11455	3	135925891	135926167		1					0
ENSG00000267058 /// ENSG00000176222 #or# ENSG00000267058	AC006213.2	NA /// zinc finger protein 404 #or# NA	17.5346	4.05192	1.53048	0.000151605	3.81929	2.11352	19	43900918	43900954		1					0
ENSG00000206932	RNU6-4P	RNA, U6 small nuclear 4, pseudogene	24.9382	5.76293	1.38304	0.00110176	2.95791	2.11348	3	181231737	181231843	1						0
ENSG00000101846	STS	steroid sulfatase	64.1151	14.8553	1.96356	1.77176e-14	13.7516	2.10969	0	7350262	7354810							1
ENSG00000234546	LINC01759	long intergenic non-protein coding RNA 1759	39.8933	9.25546	1.87794	5.24153e-10	9.28054	2.10777	1	9191393	9191967			1				0
ENSG00000124942	AHNAK	AHNAK nucleoprotein	185.848	43.1204	2.04586	4.74475e-38	37.3238	2.10768	11	62536239	62536287							1
ENSG00000243974	VTI1BP1	vesicle transport through interaction with t-SNAREs 1B pseudogene 1	12.5253	2.91272	1.46149	0.000433213	3.3633	2.1044	3	100225374	100226073	1						0
ENSG00000224094	RPS24P8	ribosomal protein S24 pseudogene 8	1045.58	243.508	2.07662	2.35589e-130	129.628	2.10226	3	45159774	45160175	1						0
ENSG00000260192	LINC02240	long intergenic non-protein coding RNA 2240	20.5265	4.7953	1.67649	6.11573e-06	5.21355	2.0978	5	125601216	125602227			1				0
ENSG00000186197 /// ENSG00000186197 #or# ENSG00000244457	EDARADD	EDAR associated death domain #or# enolase 1 pseudogene 1 /// EDAR associated death domain	299.688	70.0246	2.04669	2.00121e-57	56.6987	2.09753	1	236502840	236502915							1
ENSG00000167646 /// ENSG00000167646 #or# ENSG00000267110	DNAAF3	dynein axonemal assembly factor 3 /// dynein axonemal assembly factor 3 #or# NA	339.579	79.4033	2.07265	4.14767e-60	59.3822	2.09648	19	55165989	55166417							1
ENSG00000258648	UBE2CP1	ubiquitin conjugating enzyme E2 C pseudogene 1	104.984	24.6152	1.98333	1.09454e-23	22.9608	2.09255	14	30683045	30683598	1						0
ENSG00000228818	AL359918.1	NA	80.1642	18.7986	2.01394	6.59568e-18	17.1807	2.09233	1	240142670	240145389		1					0
ENSG00000235472	EIF4A1P7	eukaryotic translation initiation factor 4A1 pseudogene 7	138.031	32.3879	2.00499	1.25229e-29	28.9023	2.09147	13	28598833	28600052	1						0
ENSG00000220739	AL513475.2	NA	10.4309	2.44865	1.4176	0.000864129	3.06342	2.0908	6	144708106	144708497		1					0
ENSG00000226686	LINC01535	long intergenic non-protein coding RNA 1535	32.5646	7.64951	1.80777	1.96799e-08	7.70598	2.08987	19	37265286	37265535			1				0
ENSG00000206172	HBA1	hemoglobin subunit alpha 1	42.098	9.89243	1.90704	3.3458e-10	9.4755	2.08935	16	176929	177274							1
ENSG00000168140	VASN	vasorin	74.4357	17.4936	1.95082	1.10741e-16	15.9557	2.08917	16	4382900	4383528							1
ENSG00000233594	BTF3P5	basic transcription factor 3 pseudogene 5	104.585	24.6595	1.9856	5.45929e-22	21.2629	2.08446	2	55435156	55435622	1						0
ENSG00000218980	FTH1P15	ferritin heavy chain 1 pseudogene 15	15.4807	3.65122	1.57166	8.00939e-05	4.0964	2.08402	6	57004520	57004799	1						0
ENSG00000259397	AC021231.2	NA	126.971	29.9562	1.97334	1.61499e-26	25.7918	2.08357	15	35092481	35093210		1					0
ENSG00000264217	RPL35AP25	ribosomal protein L35a pseudogene 25	10.6172	2.50715	1.35659	0.00155759	2.80755	2.08228	10	45940522	45940851	1						0
ENSG00000147437	GNRH1	gonadotropin releasing hormone 1	12.113	2.86128	1.44115	0.000579476	3.23696	2.08182	8	25419262	25419418							1
ENSG00000241478	HSPA8P9	heat shock protein family A (Hsp70) member 8 pseudogene 9	40.5293	9.57512	1.81246	2.45958e-09	8.60914	2.0816	3	137880295	137882237	1						0
ENSG00000185615	PDIA2	protein disulfide isomerase family A member 2	58.9572	13.9289	1.9087	6.61657e-13	12.1794	2.08159	16	287114	287215							1
ENSG00000217241	CBX3P9	chromobox 3 pseudogene 9	64.9761	15.3589	1.92056	1.0118e-15	14.9949	2.08084	6	116453014	116453565	1						0
ENSG00000198754	OXCT2	3-oxoacid CoA-transferase 2	11.0669	2.61841	1.33739	0.00199382	2.70031	2.07948	1	39769523	39769701							1
ENSG00000213280	AC090114.1	NA	427.331	101.116	2.02453	5.47718e-60	59.2614	2.07935	7	128570241	128570688		1					0
ENSG00000219559	AL512430.3	NA	12.2984	2.91052	1.41841	0.000942585	3.02568	2.07912	6	110562175	110562615		1					0
ENSG00000125731	SH2D3A	SH2 domain containing 3A	28.971	6.86311	1.7285	3.20175e-07	6.49461	2.07768	19	6757330	6759670							1
ENSG00000232059	AL451007.1	NA	21.2353	5.0333	1.63523	1.56051e-05	4.80673	2.07689	1	244694432	244694720		1					0
ENSG00000261612	SUB1P3	SUB1 homolog, transcriptional regulator pseudogene 3	165.669	39.2852	2.02154	1.15816e-30	29.9362	2.07625	16	4562814	4563128	1						0
ENSG00000137841	PLCB2	phospholipase C beta 2	23.105	5.4881	1.68617	3.23194e-06	5.49054	2.07383	15	40303887	40304078							1
ENSG00000183979	NPB	neuropeptide B	12.2671	2.91405	1.46981	0.000704426	3.15216	2.0737	17	81902749	81902905							1
ENSG00000237749	AL034379.1	NA	199.126	47.3736	2.00532	4.28558e-36	35.368	2.07153	1	37556247	37556499		1					0
ENSG00000131845	ZNF304	zinc finger protein 304	35.4804	8.44518	1.77658	8.79371e-09	8.05583	2.07082	19	57357850	57359898							1
ENSG00000226535	AL445487.1	NA	42.3988	10.1039	1.83203	1.05971e-10	9.97481	2.06911	9	107169569	107171148		1					0
ENSG00000169981	ZNF35	zinc finger protein 35	40.4554	9.64689	1.81496	5.70835e-09	8.24349	2.0682	3	44658821	44658895							1
ENSG00000241668	RPL19P11	ribosomal protein L19 pseudogene 11	12.187	2.90918	1.36104	0.0015662	2.80515	2.06666	5	31053565	31054153	1						0
ENSG00000170775	GPR37	G protein-coupled receptor 37	17.1598	4.10602	1.53266	0.000105403	3.97715	2.06322	7	124745997	124746524							1
ENSG00000237285	HNRNPA1P2	heterogeneous nuclear ribonucleoprotein A1 pseudogene 2	24.7914	5.9345	1.69106	1.5991e-06	5.79612	2.06264	6	32325219	32326178	1						0
ENSG00000224908	TIMM8BP2	translocase of inner mitochondrial membrane 8B pseudogene 2	204.245	48.9019	2.0152	4.97478e-37	36.3032	2.06234	0	134166682	134166932	1						0
ENSG00000266944	AC005262.1	NA	10.0186	2.39941	1.32072	0.00259519	2.58583	2.06193	19	3131176	3131398		1					0
ENSG00000100290	BIK	BCL2 interacting killer	16.7101	4.00316	1.54962	0.000132562	3.87758	2.06151	22	43129306	43129712							1
ENSG00000219806	ATP5PBP6	ATP synthase peripheral stalk-membrane subunit b pseudogene 6	12.3785	2.96902	1.50263	0.000273735	3.56267	2.05978	6	139614438	139615204	1						0
ENSG00000225224	RPS27AP12	ribosomal protein S27a pseudogene 12	44.5236	10.6832	1.82994	2.12392e-10	9.67286	2.05922	7	157192368	157192832	1						0
ENSG00000258741	H2AFVP1	H2A histone family member V pseudogene 1	48.9729	11.7555	1.83456	1.78267e-11	10.7489	2.05864	15	92733823	92734195	1						0
ENSG00000226945	AC098935.1	NA	114.558	27.5182	1.93778	1.93202e-21	20.714	2.05762	1	206907619	206908229		1					0
ENSG00000276077	CU633904.1	NA	38.7346	9.31176	1.82374	3.64849e-09	8.43789	2.0565	21	7467023	7469007		1					0
ENSG00000254244	PAICSP4	phosphoribosylaminoimidazole carboxylase, phosphoribosylaminoimidazole succinocarboxamide synthetase pseudogene 4	34.1344	8.21158	1.70772	2.96086e-08	7.52858	2.0555	8	4787332	4788584	1						0
ENSG00000163191	S100A11	S100 calcium binding protein A11	1834.53	441.368	2.04158	3.01474e-210	209.521	2.05536	1	152032506	152032823							1
ENSG00000185988	PLK5	polo like kinase 5	10.1706	2.44731	1.30027	0.00312597	2.50502	2.05513	19	1528898	1529048							1
ENSG00000186977	KRTAP19-5	keratin associated protein 19-5	12.3389	2.97035	1.47247	0.000553905	3.25656	2.05451	21	30501657	30501871							1
ENSG00000258477	PPIAP6	peptidylprolyl isomerase A pseudogene 6	519.348	125.103	2.02341	4.13673e-90	89.3833	2.05359	14	68421698	68422196	1						0
ENSG00000242960	FTH1P23	ferritin heavy chain 1 pseudogene 23	55.6312	13.4102	1.84112	4.61592e-13	12.3357	2.05256	3	72929044	72929593	1						0
ENSG00000280441	FP236383.1	NA	152.092	36.7245	2.00825	1.6631e-31	30.7791	2.05013	21	8410179	8410645		1					0
ENSG00000234176	HSPA8P1	heat shock protein family A (Hsp70) member 8 pseudogene 1	28.8222	6.96111	1.64232	1.00404e-06	5.99825	2.04979	0	121203182	121205014	1						0
ENSG00000188629 #or# ENSG00000270011 /// ENSG00000188321 #or# ENSG00000270011 /// ENSG00000270011	ZNF559-ZNF177	zinc finger protein 559 #or# ZNF559-ZNF177 readthrough /// ZNF559-ZNF177 readthrough /// zinc finger protein 177 #or# ZNF559-ZNF177 readthrough	40.1119	9.70673	1.79336	1.62272e-09	8.78976	2.04697	19	9380057	9380132							1
ENSG00000230223	ATXN8OS	ATXN8 opposite strand (non-protein coding)	26.1697	6.333	1.66614	1.28129e-06	5.89235	2.04694	13	70130678	70131546							1
ENSG00000103740	ACSBG1	acyl-CoA synthetase bubblegum family member 1	19.3272	4.68049	1.59882	2.43004e-05	4.61439	2.0459	15	78213523	78213867							1
ENSG00000234036	TXNP6	thioredoxin pseudogene 6	1490.9	361.107	2.02598	1.49404e-123	122.826	2.04568	4	76958860	76959169	1						0
ENSG00000243297	RPL31P61	ribosomal protein L31 pseudogene 61	24.4915	5.9407	1.72559	1.86862e-06	5.72848	2.04358	19	36901742	36902117	1						0
ENSG00000274333	CU633967.1	NA	49.3852	12.045	1.80462	1.97046e-10	9.70543	2.03565	21	5590019	5592003		1					0
ENSG00000244097	RPS4XP17	ribosomal protein S4X pseudogene 17	1286.57	314.28	2.02176	3.02427e-168	167.519	2.03341	17	656794	657547	1						0
ENSG00000165949	IFI27	interferon alpha inducible protein 27	25.9094	6.333	1.65027	3.18893e-06	5.49636	2.03251	14	94116442	94116690							1
ENSG00000105467	SYNGR4	synaptogyrin 4	17.3087	4.23276	1.52373	0.000134561	3.87108	2.03182	19	48376126	48376271							1
ENSG00000163359	COL6A3	collagen type VI alpha 3 chain	17.0474	4.17293	1.51307	0.000166117	3.77959	2.03042	2	237386454	237386583							1
ENSG00000163499	CRYBA2	crystallin beta A2	13.0864	3.20482	1.46283	0.000616923	3.20977	2.02975	2	218991847	218992243							1
ENSG00000185904	LINC00839	long intergenic non-protein coding RNA 839	102.515	25.1232	1.94172	1.76877e-20	19.7523	2.02874	10	42494015	42495336			1				0
ENSG00000207524	RNU6-33P	RNA, U6 small nuclear 33, pseudogene	22.0994	5.42073	1.35091	0.00127848	2.89331	2.02745	4	88684848	88684954	1						0
ENSG00000265545	AP005403.1	NA	88.9805	21.8625	1.86666	1.24116e-17	16.9062	2.02503	18	4459230	4459458		1					0
ENSG00000258016	HIGD1AP1	HIG1 hypoxia inducible domain family member 1A pseudogene 1	29.0106	7.13841	1.69487	2.66097e-07	6.57496	2.02291	12	53142053	53142327	1						0
ENSG00000151364 #or# ENSG00000259112 /// ENSG00000151366 #or# ENSG00000259112	NDUFC2-KCTD14	potassium channel tetramerization domain containing 14 #or# NDUFC2-KCTD14 readthrough /// NADH:ubiquinone oxidoreductase subunit C2 #or# NDUFC2-KCTD14 readthrough	907.535	223.36	2.00649	3.54173e-103	102.451	2.02259	11	78017175	78017270							1
ENSG00000251495	PPIAP11	peptidylprolyl isomerase A pseudogene 11	472.537	116.363	1.99134	3.37551e-81	80.4717	2.02179	5	82009602	82010094	1						0
ENSG00000271029	AC135178.6	NA	65.7622	16.2024	1.84505	2.77416e-14	13.5569	2.02105	17	8296505	8296735		1					0
ENSG00000242100	RPL9P32	ribosomal protein L9 pseudogene 32	491.766	121.184	1.99047	1.46664e-58	57.8337	2.02078	19	29956369	29956988	1						0
ENSG00000233608	TWIST2	twist family bHLH transcription factor 2	147.941	36.4829	1.92538	5.19307e-28	27.2846	2.01973	2	238909842	238910543							1
ENSG00000135587	SMPD2	sphingomyelin phosphodiesterase 2	213.51	52.7056	1.94001	4.65332e-33	32.3322	2.01828	6	109443517	109443556							1
ENSG00000213452	AKR1B1P2	aldo-keto reductase family 1 member B1 pseudogene 2	10.1331	2.50581	1.30856	0.00194137	2.71189	2.01572	3	74135959	74136892	1						0
ENSG00000234118	RPL13AP6	ribosomal protein L13a pseudogene 6	83.3008	20.6063	1.88004	8.05016e-17	16.0942	2.01525	10	110936622	110937233	1						0
ENSG00000227890	PSMA2P3	proteasome subunit alpha 2 pseudogene 3	148.576	36.7674	1.9132	5.32783e-30	29.2734	2.0147	2	202179297	202179971	1						0
ENSG00000198804	MT-CO1	mitochondrially encoded cytochrome c oxidase I	7987.57	1977.45	1.89863	4.5238e-19	18.3445	2.01411	0	7443	7445						1	0
ENSG00000165802	NSMF	NMDA receptor synaptonuclear signaling and neuronal migration factor	1324.24	327.887	2.0043	4.44693e-121	120.352	2.0139	9	137452465	137452819							1
ENSG00000166592	RRAD	RRAD, Ras related glycolysis inhibitor and calcium channel regulator	43.8949	10.8725	1.92776	5.6437e-13	12.2484	2.01337	16	66921832	66921990							1
ENSG00000213648 #or# ENSG00000260280	SULT1A4	sulfotransferase family 1A member 4 #or# SLX1B-SULT1A4 readthrough (NMD candidate)	166.253	41.1823	1.92299	5.68566e-30	29.2452	2.01328	16	29463345	29463955							1
ENSG00000228499	TMSB10P1	thymosin beta 10 pseudogene 1	61.5804	15.2968	1.8799	7.18829e-14	13.1434	2.00924	2	235882362	235882493	1						0
ENSG00000185338	SOCS1	suppressor of cytokine signaling 1	16.0366	3.98989	1.44058	0.000290147	3.53738	2.00695	16	11254417	11254842							1
ENSG00000223551	TMSB4XP4	TMSB4X pseudogene 4	57.206	14.2413	1.85463	8.77665e-11	10.0567	2.00608	9	128342153	128342770	1						0
ENSG00000213051	RPL5P5	ribosomal protein L5 pseudogene 5	195.239	48.6071	1.95175	4.21521e-35	34.3752	2.006	1	185226808	185227700	1						0
ENSG00000231911	TPRKBP1	TP53RK binding protein pseudogene 1	33.7243	8.39775	1.79286	2.26236e-08	7.64544	2.00571	10	28658987	28659467	1						0
ENSG00000125657	TNFSF9	TNF superfamily member 9	166.52	41.482	1.95311	4.55314e-34	33.3417	2.00514	19	6535067	6535928							1
ENSG00000225644	RPL35AP4	ribosomal protein L35a pseudogene 4	26.5758	6.62731	1.56474	2.13103e-05	4.67141	2.00362	6	33389374	33389475	1						0
ENSG00000234645	YWHAEP5	tyrosine 3-monooxygenase/tryptophan 5-monooxygenase activation protein epsilon pseudogene 5	13.7224	3.42735	1.41934	0.000785146	3.10505	2.00137	2	138288029	138288793	1						0
ENSG00000144681	STAC	SH3 and cysteine rich domain	12.4129	0	2.95991	4.35011e-11	10.3615	?	3	36528848	36529239							1
ENSG00000139679	LPAR6	lysophosphatidic acid receptor 6	11.8892	0	2.78635	7.34766e-10	9.13385	?	13	48411741	48412205							1
ENSG00000210127	MT-TA	mitochondrially encoded tRNA alanine	243.116	0	7.06706	1.77922e-78	77.7498	?	0	5587	5655						1	0
ENSG00000226887	ERVMER34-1	endogenous retrovirus group MER34 member 1, envelope	11.4395	0	2.75625	8.78288e-10	9.05636	?	4	52743517	52743828							1
ENSG00000231630	AL592464.1	NA	10.7691	0	2.6641	3.6897e-09	8.43301	?	1	2814432	2814688		1					0
ENSG00000142661	MYOM3	myomesin 3	10.4309	0	2.67709	1.52824e-09	8.81581	?	1	24081549	24084639							1
ENSG00000189190	ZNF600	zinc finger protein 600	11.4426	0	2.70531	1.78004e-09	8.74957	?	19	52780992	52781464							1
ENSG00000253706	AC011632.1	NA	16.6373	0	3.38562	6.79545e-14	13.1678	?	8	74844848	74845035		1					0
ENSG00000170468	RIOX1	ribosomal oxygenase 1	75.1528	0	5.53611	1.33973e-41	40.873	?	14	73492944	73493392							1
ENSG00000232622	AC114482.1	NA	24.451	0	3.96424	5.12804e-19	18.29	?	1	84636158	84636258		1					0
ENSG00000189252	SPANXN3	SPANX family member N3	27.1056	0	3.88806	1.55201e-19	18.8091	?	0	143508735	143508814							1
ENSG00000121207	LRAT	lecithin retinol acyltransferase	10.3934	0	2.5933	8.08632e-09	8.09225	?	4	154748984	154749180							1
ENSG00000280418	AC007326.2	NA	11.9632	0	2.64732	5.75027e-09	8.24031	?	22	18951934	18959512		1					0
ENSG00000184363	PKP3	plakophilin 3	148.348	0	6.49242	2.77545e-61	60.5567	?	11	404534	404681							1
ENSG00000224440	CXorf51A	chromosome X open reading frame 51A	10.0217	0	2.50749	3.54909e-08	7.44988	?	0	146814106	146814206							1
ENSG00000088882	CPXM1	carboxypeptidase X, M14 family member 1	15.4058	0	3.26213	5.39543e-13	12.268	?	20	2794069	2794189							1
ENSG00000235699	CXorf51B	chromosome X open reading frame 51B	17.7958	0	3.21404	5.33258e-13	12.2731	?	0	146810309	146810409							1
ENSG00000172716	SLFN11	schlafen family member 11	180.804	0	6.83498	2.28798e-67	66.6405	?	17	35367266	35367700							1
ENSG00000198131 /// ENSG00000198131 #or# ENSG00000283515	ZNF544	zinc finger protein 544 #or# NA /// zinc finger protein 544	63.1076	0	5.28848	1.18506e-37	36.9263	?	19	58262755	58264092							1
ENSG00000166509	CLEC3A	C-type lectin domain family 3 member A	30.8073	0	4.35	6.53552e-23	22.1847	?	16	78030447	78030951							1
ENSG00000257005	AC027667.1	NA	14.5438	0	3.1093	6.52623e-12	11.1853	?	12	63651627	63651930		1					0
ENSG00000169255	B3GALNT1	beta-1,3-N-acetylgalactosaminyltransferase 1 (globoside blood group)	23.9648	0	3.93643	1.25441e-18	17.9016	?	3	161103142	161103205							1
ENSG00000258982	AL133523.1	NA	30.9562	0	4.173	5.03707e-22	21.2978	?	14	100207407	100207652		1					0
ENSG00000223609	HBD	hemoglobin subunit delta	26.3551	0	4.05071	9.53711e-20	19.0206	?	11	5234434	5234530							1
ENSG00000157617	C2CD2	C2 calcium dependent domain containing 2	87.2943	0	5.84218	1.21314e-45	44.9161	?	21	41952946	41953151							1
ENSG00000125878	TCF15	transcription factor 15	42.9215	0	4.86637	1.54296e-29	28.8116	?	20	603797	604590							1
ENSG00000162755	KLHDC9	kelch domain containing 9	20.187	0	3.66313	4.38309e-16	15.3582	?	1	161100061	161100346							1
ENSG00000213297 #or# ENSG00000242615 #or# ENSG00000257591 /// ENSG00000213297 #or# ENSG00000257591 /// ENSG00000242615 #or# ENSG00000257591 /// ENSG00000257591	ZNF625	NA #or# zinc finger protein 625 /// ZNF625-ZNF20 readthrough (NMD candidate) #or# NA #or# zinc finger protein 625 /// zinc finger protein 625 /// ZNF625-ZNF20 readthrough (NMD candidate) #or# zinc finger protein 625	35.2545	0	4.56367	1.6221e-25	24.7899	?	19	12145265	12145296							1
ENSG00000092096	SLC22A17	solute carrier family 22 member 17	17.6834	70.744	-1.71615	1.13178e-10	9.94624	-2.00021	14	23350919	23351672							1
ENSG00000064393	HIPK2	homeodomain interacting protein kinase 2	98.4726	394.545	-1.95158	4.85301e-44	43.314	-2.0024	7	139583524	139583724							1
ENSG00000198003	CCDC151	coiled-coil domain containing 151	4.26185	17.0783	-1.29967	0.000623187	3.20538	-2.00261	19	11430559	11430776							1
ENSG00000145050	MANF	mesencephalic astrocyte derived neurotrophic factor	667.502	2676.04	-1.9899	3.3883e-177	176.47	-2.00325	3	51388905	51389149							1
ENSG00000162946 #or# ENSG00000270106 /// ENSG00000162946	DISC1	DISC1 scaffold protein /// DISC1 scaffold protein #or# TSNAX-DISC1 readthrough (NMD candidate)	6.02012	24.1489	-1.39804	7.94311e-05	4.10001	-2.00409	1	232008785	232009022							1
ENSG00000141505	ASGR1	asialoglycoprotein receptor 1	2.9898	11.9957	-1.19956	0.00311492	2.50655	-2.0044	17	7178564	7178899							1
ENSG00000127585	FBXL16	F-box and leucine rich repeat protein 16	10.3913	41.693	-1.67813	9.88106e-08	7.0052	-2.00443	16	694658	694697							1
ENSG00000165495	PKNOX2	PBX/knotted 1 homeobox 2	14.0202	56.2922	-1.69021	5.38024e-09	8.2692	-2.00543	11	125431166	125433389							1
ENSG00000139410	SDSL	serine dehydratase like	19.5906	78.6732	-1.73361	5.39334e-12	11.2681	-2.00571	12	113436884	113437109							1
ENSG00000149292 #or# ENSG00000270179 /// ENSG00000270179	AP002840.2	NA /// tetratricopeptide repeat domain 12 #or# NA	2.7295	10.9661	-1.09065	0.00935403	2.029	-2.00634	11	113368478	113369117		1					0
ENSG00000101265	RASSF2	Ras association domain family member 2	3.1792	12.7981	-1.032	0.00911067	2.04045	-2.00919	20	4780026	4784272							1
ENSG00000182158	CREB3L2	cAMP responsive element binding protein 3 like 2	73.3135	295.279	-1.92938	3.67002e-34	33.4353	-2.00993	7	137999659	137999810							1
ENSG00000187091	PLCD1	phospholipase C delta 1	6.76757	27.297	-1.44484	2.57689e-05	4.5889	-2.01203	3	38020229	38020352							1
ENSG00000142089	IFITM3	interferon induced transmembrane protein 3	17.8719	72.1555	-1.72993	3.21729e-11	10.4925	-2.01342	11	319773	319837							1
ENSG00000156650	KAT6B	lysine acetyltransferase 6B	33.795	136.593	-1.90286	3.47915e-19	18.4585	-2.015	10	75024958	75026164							1
ENSG00000167797	CDK2AP2	cyclin dependent kinase 2 associated protein 2	238.329	964.059	-1.99234	1.53293e-89	88.8145	-2.01617	11	67507211	67507497							1
ENSG00000173531	MST1	macrophage stimulating 1	5.0093	20.2734	-1.48081	0.000100292	3.99874	-2.0169	3	49687813	49687897							1
ENSG00000086619	ERO1B	endoplasmic reticulum oxidoreductase 1 beta	34.5467	139.846	-1.84637	2.36975e-19	18.6253	-2.01722	1	236249959	236249967							1
ENSG00000130203 #or# ENSG00000280087 /// ENSG00000130203	APOE	apolipoprotein E #or# NA /// apolipoprotein E	33.0892	133.956	-1.81348	3.56126e-19	18.4484	-2.01733	19	44906360	44906624							1
ENSG00000119715	ESRRB	estrogen related receptor beta	3.4395	13.9395	-1.14649	0.00302333	2.51951	-2.01891	14	76499646	76501835							1
ENSG00000278730	AC005332.7	NA	36.4152	147.72	-1.87613	4.34415e-20	19.3621	-2.02025	17	68126666	68129586		1					0
ENSG00000006025	OSBPL7	oxysterol binding protein like 7	4.86043	19.717	-1.32411	0.000292778	3.53346	-2.02029	17	47819721	47820096							1
ENSG00000232859 #or# ENSG00000266202 /// ENSG00000232859	LYRM9	LYR motif containing 9 #or# NA /// LYR motif containing 9	10.7691	43.7076	-1.59621	1.60997e-07	6.79318	-2.02098	17	27891929	27894752							1
ENSG00000180818 /// ENSG00000180818 #or# ENSG00000273049	HOXC10	homeobox C10 #or# NA /// homeobox C10	30.4337	123.587	-1.83457	4.3287e-18	17.3636	-2.02179	12	53989169	53989710							1
ENSG00000006282	SPATA20	spermatogenesis associated 20	29.3854	119.344	-1.84725	4.28197e-17	16.3684	-2.02196	17	50551511	50551939							1
ENSG00000141540	TTYH2	tweety family member 2	15.516	63.0599	-1.74257	2.05048e-10	9.68814	-2.02297	17	74260129	74260206							1
ENSG00000170577	SIX2	SIX homeobox 2	41.9481	170.586	-1.88739	1.16499e-23	22.9337	-2.02382	2	45005161	45006169							1
ENSG00000108387	SEPT4	septin 4	4.37328	17.8647	-1.34955	0.000319971	3.49489	-2.03032	17	58529818	58531524							1
ENSG00000130283 #or# ENSG00000223802	GDF1	growth differentiation factor 1 #or# ceramide synthase 1	36.7129	150.018	-1.89977	7.72309e-21	20.1122	-2.03078	19	18868545	18868596							1
ENSG00000067840	PDZD4	PDZ domain containing 4	6.35533	25.9893	-1.47109	3.03828e-05	4.51737	-2.03188	0	153807327	153807369							1
ENSG00000139618	BRCA2	BRCA2, DNA repair associated	27.1409	111.039	-1.88263	9.27027e-17	16.0329	-2.03252	13	32398162	32398448							1
ENSG00000184451	CCR10	C-C motif chemokine receptor 10	3.4395	14.0938	-1.26456	0.00148317	2.82881	-2.03479	17	42679976	42680617							1
ENSG00000056998	GYG2	glycogenin 2	16.1136	66.0338	-1.74142	6.00672e-11	10.2214	-2.03492	0	2881052	2881091							1
ENSG00000154310	TNIK	TRAF2 and NCK interacting kinase	24.0013	98.6345	-1.85047	2.71891e-15	14.5656	-2.03898	3	171346934	171347203							1
ENSG00000177946	CENPBD1	CENPB DNA-binding domain containing 1	28.0394	115.245	-1.86628	4.38419e-17	16.3581	-2.03917	16	89970048	89970363							1
ENSG00000167107	ACSF2	acyl-CoA synthetase family member 2	20.0028	82.4703	-1.79144	6.94268e-13	12.1585	-2.04367	17	50474502	50474774							1
ENSG00000103154	NECAB2	N-terminal EF-hand calcium binding protein 2	2.54317	10.494	-1.11503	0.00715629	2.14531	-2.04486	16	84002347	84002776							1
ENSG00000188760	TMEM198	transmembrane protein 198	20.6379	85.1614	-1.78415	5.52756e-13	12.2575	-2.0449	2	219544050	219544086							1
ENSG00000105290	APLP1	amyloid beta precursor like protein 1	23.893	98.6847	-1.79915	1.37224e-14	13.8626	-2.04624	19	35879343	35879791							1
ENSG00000142611	PRDM16	PR/SET domain 16	9.86973	40.7772	-1.67929	1.01722e-07	6.99259	-2.04668	1	3426051	3426072							1
ENSG00000125848	FLRT3	fibronectin leucine rich transmembrane protein 3	3.1792	13.1438	-1.08482	0.00658358	2.18154	-2.04765	20	14328922	14329327							1
ENSG00000073150	PANX2	pannexin 2	11.4021	47.1472	-1.65061	6.01628e-08	7.22067	-2.04787	22	50179221	50179598							1
ENSG00000067082	KLF6	Kruppel like factor 6	61.4294	254.029	-1.94868	1.834e-33	32.7366	-2.04799	10	3781808	3782214							1
ENSG00000046604	DSG2	desmoglein 2	164.99	682.356	-2.0087	7.34871e-79	78.1338	-2.04815	18	31522259	31522608							1
ENSG00000132386	SERPINF1	serpin family F member 1	70.9317	294.872	-1.92893	4.73208e-37	36.3249	-2.05559	17	1777187	1777565							1
ENSG00000203943	SAMD13	sterile alpha motif domain containing 13	2.7295	11.3676	-1.17073	0.0042469	2.37193	-2.05822	1	84389779	84389957							1
ENSG00000115129	TP53I3	tumor protein p53 inducible protein 3	22.6928	94.7179	-1.84128	6.63288e-15	14.1783	-2.06141	2	24084749	24084860							1
ENSG00000166292	TMEM100	transmembrane protein 100	4.44818	18.604	-1.41646	0.000199052	3.70103	-2.06433	17	55722556	55722729							1
ENSG00000128268	MGAT3	mannosyl (beta-1,4-)-glycoprotein beta-1,4-N-acetylglucosaminyltransferase	7.77626	32.5409	-1.62237	1.20769e-06	5.91804	-2.0651	22	39477513	39477739							1
ENSG00000250215	CIR1P2	corepressor interacting with RBPJ, 1 pseudogene 2	4.03807	16.9213	-1.33029	0.000663432	3.1782	-2.0671	4	114713579	114714920	1						0
ENSG00000271992	AL354872.2	NA	13.7224	57.5257	-1.70687	5.8656e-09	8.23169	-2.06767	1	70445071	70445536		1					0
ENSG00000210164 /// ENSG00000198938 #or# ENSG00000210164 /// ENSG00000198840 #or# ENSG00000210164	MT-TG	mitochondrially encoded cytochrome c oxidase III #or# mitochondrially encoded tRNA glycine /// mitochondrially encoded NADH:ubiquinone oxidoreductase core subunit 3 #or# mitochondrially encoded tRNA glycine /// mitochondrially encoded tRNA glycine	228.28	958.001	-1.8922	4.79414e-14	13.3193	-2.06923	0	9991	10058						1	0
ENSG00000102935	ZNF423	zinc finger protein 423	5.08421	21.3638	-1.49194	7.34175e-05	4.1342	-2.07107	16	49730576	49730723							1
ENSG00000008283	CYB561	cytochrome b561	24.4114	102.592	-1.8886	1.25206e-15	14.9024	-2.07129	17	63439207	63439290							1
ENSG00000140044	JDP2	Jun dimerization protein 2	13.4965	56.7323	-1.75711	9.21075e-10	9.0357	-2.07159	14	75469476	75470457							1
ENSG00000248367	AC008610.1	NA	7.43798	31.27	-1.63623	1.3641e-06	5.86515	-2.0718	5	180295035	180295253		1					0
ENSG00000152229	PSTPIP2	proline-serine-threonine phosphatase interacting protein 2	11.7404	49.5163	-1.66195	1.35241e-08	7.86889	-2.07643	18	46010760	46011287							1
ENSG00000071575	TRIB2	tribbles pseudokinase 2	6.80503	28.7269	-1.51627	1.01492e-05	4.99357	-2.07773	2	12724825	12724825							1
ENSG00000044574	HSPA5	heat shock protein family A (Hsp70) member 5	1280.7	5411.66	-2.06656	3.06775e-190	189.513	-2.07913	9	125234853	125236591							1
ENSG00000139266	MARCH9	membrane associated ring-CH-type finger 9	55.6748	235.266	-1.94272	3.15257e-31	30.5013	-2.07919	12	57758898	57759416							1
ENSG00000268388	FENDRR	FOXF1 adjacent non-coding developmental regulatory RNA	5.79421	24.5447	-1.48581	2.64419e-05	4.57771	-2.08273	16	86490268	86491004							1
ENSG00000207513	RNU1-3	RNA, U1 small nuclear 3	3.47695	14.8416	-1.28885	0.00105846	2.97532	-2.09375	1	16666785	16666948							1
ENSG00000257556	LINC02298	long intergenic non-protein coding RNA 2298	2.91583	12.4483	-1.31104	0.00135307	2.86868	-2.09397	14	105095540	105095767			1				0
ENSG00000119632	IFI27L2	interferon alpha inducible protein 27 like 2	35.4439	151.342	-1.9276	4.98315e-22	21.3025	-2.0942	14	94128377	94129291							1
ENSG00000128346	C22orf23	chromosome 22 open reading frame 23	3.47695	14.8526	-1.26064	0.00135854	2.86693	-2.09482	22	37953150	37953545							1
ENSG00000146530	VWDE	von Willebrand factor D and EGF domains	3.32808	14.2197	-1.23764	0.00186759	2.72872	-2.09513	7	12377564	12377920							1
ENSG00000158301 #or# ENSG00000271147 /// ENSG00000158301	GPRASP2	G protein-coupled receptor associated sorting protein 2 #or# ARMCX5-GPRASP2 readthrough /// G protein-coupled receptor associated sorting protein 2	40.599	173.572	-1.98124	4.08573e-25	24.3887	-2.09602	0	102714537	102714814							1
ENSG00000115226	FNDC4	fibronectin type III domain containing 4	13.6819	58.5488	-1.76194	3.08343e-10	9.51097	-2.09737	2	27492713	27492790							1
ENSG00000197763 #or# ENSG00000283374 /// ENSG00000197763	TXNRD3	thioredoxin reductase 3 #or# thioredoxin reductase 3 neighbor /// thioredoxin reductase 3	14.4293	61.8188	-1.79118	1.84268e-10	9.73455	-2.09904	3	126607905	126607907							1
ENSG00000186310	NAP1L3	nucleosome assembly protein 1 like 3	11.5144	49.4724	-1.72227	4.82388e-09	8.3166	-2.10318	0	93670935	93671783							1
ENSG00000165655	ZNF503	zinc finger protein 503	357.114	1534.79	-2.07989	9.2688e-106	105.033	-2.10359	10	75397830	75398748							1
ENSG00000158106	RHPN1	rhophilin Rho GTPase binding protein 1	14.1712	60.9749	-1.73138	4.83604e-10	9.31551	-2.10526	8	143382436	143382779							1
ENSG00000124785	NRN1	neuritin 1	97.9186	422.106	-2.03862	2.6715e-43	42.5732	-2.10795	6	5998715	5999204							1
ENSG00000143630	HCN3	hyperpolarization activated cyclic nucleotide gated potassium channel 3	12.2266	52.7145	-1.74801	2.30837e-09	8.63669	-2.10818	1	155289391	155289518							1
ENSG00000185513 #or# ENSG00000277611 /// ENSG00000185513	L3MBTL1	L3MBTL1, histone methyl-lysine binding protein /// L3MBTL1, histone methyl-lysine binding protein #or# NA	4.78552	20.6529	-1.44049	0.000176825	3.75246	-2.10959	20	43548147	43548306							1
ENSG00000125354	SEPT6	septin 6	80.3152	346.762	-2.00283	3.55946e-43	42.4486	-2.1102	0	119628816	119629508							1
ENSG00000115935	WIPF1	WAS/WASL interacting protein family member 1	28.5265	123.319	-1.92361	1.39314e-18	17.856	-2.11202	2	174676337	174676666							1
ENSG00000065609	SNAP91	synaptosome associated protein 91	4.89788	21.1808	-1.4745	6.679e-05	4.17529	-2.11252	6	83686829	83686839							1
ENSG00000175197	DDIT3	DNA damage inducible transcript 3	73.7257	318.852	-2.03603	1.29035e-36	35.8893	-2.11265	12	57517476	57517542							1
ENSG00000231908	IDH1-AS1	IDH1 antisense RNA 1	4.44818	19.2432	-1.38693	0.000176728	3.7527	-2.11306	2	208255903	208256168							1
ENSG00000242498 #or# ENSG00000250021 /// ENSG00000242498	ARPIN	actin related protein 2/3 complex inhibitor #or# C15orf38-AP3S2 readthrough /// actin related protein 2/3 complex inhibitor	48.4149	210.31	-2.01056	1.47455e-27	26.8313	-2.11899	15	89902849	89903137							1
ENSG00000226137	BAIAP2-DT	BAIAP2 divergent transcript	11.2532	48.8882	-1.74795	4.56825e-09	8.34025	-2.11915	17	81029702	81033398							1
ENSG00000096093 #or# ENSG00000170915 /// ENSG00000170915	PAQR8	EF-hand domain containing 1 #or# progestin and adipoQ receptor family member 8 /// progestin and adipoQ receptor family member 8	17.4962	76.0438	-1.86892	9.12888e-13	12.0396	-2.11979	6	52404279	52407691							1
ENSG00000272872	AP000525.1	NA	12.8595	55.9447	-1.79805	5.35233e-10	9.27146	-2.12116	22	15823197	15823890		1					0
ENSG00000132635	PCED1A	PC-esterase domain containing 1A	69.2745	302.291	-2.05597	4.88934e-39	38.3107	-2.12554	20	2839913	2839933							1
ENSG00000228288	PCAT6	prostate cancer associated transcript 6 (non-protein coding)	3.32808	14.5619	-1.25043	0.00146411	2.83443	-2.12943	1	202811689	202811913							1
ENSG00000132329	RAMP1	receptor activity modifying protein 1	24.3761	106.819	-1.90534	1.51699e-16	15.819	-2.13163	2	237911784	237912010							1
ENSG00000262877	AC110285.2	NA	2.84092	12.451	-1.23312	0.00247845	2.60582	-2.13183	17	81388131	81388309		1					0
ENSG00000177640	CASC2	cancer susceptibility 2 (non-protein coding)	4.86043	21.3119	-1.47362	7.51724e-05	4.12394	-2.1325	10	118206522	118206581							1
ENSG00000115257	PCSK4	proprotein convertase subtilisin/kexin type 4	3.66328	16.1186	-1.39288	0.000411635	3.38549	-2.13752	19	1487964	1488092							1
ENSG00000186868	MAPT	microtubule associated protein tau	24.8267	109.409	-1.92122	7.10614e-17	16.1484	-2.13977	17	45987040	45987095							1
ENSG00000166689	PLEKHA7	pleckstrin homology domain containing A7	7.21514	31.8099	-1.65199	1.12367e-06	5.94936	-2.14038	11	16854894	16854993							1
ENSG00000143869	GDF7	growth differentiation factor 7	7.28911	32.2203	-1.66879	8.34156e-07	6.07875	-2.14416	2	20671426	20679245							1
ENSG00000167619	TMEM145	transmembrane protein 145	13.7193	60.6658	-1.8363	9.70427e-11	10.013	-2.14467	19	42321675	42321775							1
ENSG00000234694	AL139289.2	NA	2.58063	11.412	-1.25915	0.00355521	2.44914	-2.14476	1	43354684	43355006		1					0
ENSG00000163322	ABRAXAS1	abraxas 1, BRCA1 A complex subunit	30.772	136.468	-1.96363	2.24007e-20	19.6497	-2.14887	4	83478808	83480146							1
ENSG00000069188	SDK2	sidekick cell adhesion molecule 2	17.5711	77.9303	-1.87564	2.80426e-12	11.5522	-2.14898	17	73504340	73504461							1
ENSG00000271776	AL445209.1	NA	7.44105	33.0754	-1.63038	1.68622e-06	5.77309	-2.15218	13	78596129	78599619		1					0
ENSG00000265666	RARA-AS1	RARA antisense RNA 1	4.86043	21.6272	-1.54161	3.47442e-05	4.45912	-2.15369	17	40340867	40341700							1
ENSG00000087076	HSD17B14	hydroxysteroid 17-beta dehydrogenase 14	9.56891	42.5792	-1.7527	2.21214e-08	7.65519	-2.15372	19	48813109	48813251							1
ENSG00000173511	VEGFB	vascular endothelial growth factor B	130.816	582.29	-2.10775	4.15284e-71	70.3817	-2.1542	11	64237797	64237901							1
ENSG00000185495	AC138393.1	NA	7.02881	31.2904	-1.61156	1.54941e-06	5.80983	-2.15437	1	224008727	224010612		1					0
ENSG00000078081	LAMP3	lysosomal associated membrane protein 3	2.7295	12.1611	-1.2165	0.00259484	2.58589	-2.15557	3	183158113	183158132							1
ENSG00000123096	SSPN	sarcospan	4.11298	18.3469	-1.39585	0.000333858	3.47644	-2.15728	12	26252889	26252920							1
ENSG00000240990 /// ENSG00000240990 #or# ENSG00000278334 /// as__ENSG00000240990 #or# as__ENSG00000278020 /// ENSG00000240990 #or# ENSG00000278020 /// ENSG00000240990 #or# ENSG00000276496 /// ENSG00000240990 #or# ENSG00000277966 /// as__ENSG00000240990 #or# as__ENSG00000277966 /// as__ENSG00000240990 #or# as__ENSG00000273961 /// as__ENSG00000240990 #or# as__ENSG00000278592	HOXA11-AS	HOXA11 antisense RNA #or# NA /// HOXA11 antisense RNA	25.4972	113.766	-1.96042	8.86141e-18	17.0525	-2.15767	7	27188601	27189220							1
ENSG00000103034	NDRG4	NDRG family member 4	15.7754	70.4639	-1.90076	2.00957e-12	11.6969	-2.15921	16	58510711	58513410							1
ENSG00000273142	AC073335.2	NA	5.68185	25.4233	-1.56785	1.14822e-05	4.93998	-2.16172	7	66902857	66906297		1					0
ENSG00000198270	TMEM116	transmembrane protein 116	9.49494	42.541	-1.77349	2.82801e-08	7.54852	-2.16362	12	112010425	112013185							1
ENSG00000270006	AC010531.6	NA	3.66328	16.4458	-1.34103	0.000517317	3.28624	-2.16651	16	87317857	87318043		1					0
ENSG00000276007	AC079414.3	NA	7.29218	32.7385	-1.61181	2.41372e-06	5.61731	-2.16657	16	78123243	78124332		1					0
ENSG00000078549	ADCYAP1R1	ADCYAP receptor type I	6.20645	27.8657	-1.54599	6.4738e-06	5.18884	-2.16665	7	31104868	31104899							1
ENSG00000217555	CKLF	chemokine like factor	49.4297	222.326	-2.0289	6.59574e-31	30.1807	-2.16922	16	66565886	66566069							1
ENSG00000141622	RNF165	ring finger protein 165	3.36553	15.1447	-1.3372	0.000749275	3.12536	-2.16991	18	46455974	46456067							1
ENSG00000110455	ACCS	1-aminocyclopropane-1-carboxylate synthase homolog (inactive)	5.83166	26.2606	-1.62161	4.86051e-06	5.31332	-2.17092	11	44083695	44083893							1
ENSG00000119888	EPCAM	epithelial cell adhesion molecule	2.91583	13.1438	-1.32194	0.0013503	2.86957	-2.17241	2	47385166	47385210							1
ENSG00000228594	FNDC10	fibronectin type III domain containing 10	51.5545	232.421	-2.06913	2.1935e-32	31.6589	-2.17257	1	1598012	1599334							1
ENSG00000101017	CD40	CD40 molecule	3.32808	15.0193	-1.20916	0.00181382	2.74141	-2.17406	20	46126640	46127161							1
ENSG00000101255	TRIB3	tribbles pseudokinase 3	76.6446	346.14	-2.07848	2.13656e-38	37.6703	-2.1751	20	396691	396748							1
ENSG00000204262	COL5A2	collagen type V alpha 2 chain	2.76696	12.5033	-1.25118	0.00207895	2.68216	-2.17594	2	189056766	189057026							1
ENSG00000232238	RPS29P8	ribosomal protein S29 pseudogene 8	55.3344	250.5	-2.0689	9.36404e-35	34.0285	-2.17856	2	148595158	148595328	1						0
ENSG00000153363	LINC00467	long intergenic non-protein coding RNA 467	29.2749	133.214	-2.00437	8.42102e-20	19.0746	-2.18601	1	211432319	211432534			1				0
ENSG00000161958 /// ENSG00000161958 #or# ENSG00000272884	FGF11	fibroblast growth factor 11 /// fibroblast growth factor 11 #or# NA	13.2718	60.5285	-1.83646	2.13431e-10	9.67074	-2.18925	17	7441776	7442532							1
ENSG00000188883	KLRG2	killer cell lectin like receptor G2	13.6475	62.4296	-1.81896	8.28711e-11	10.0816	-2.19359	7	139453338	139453519							1
ENSG00000260095	AC106820.3	NA	2.7295	12.5011	-1.19336	0.00394091	2.4044	-2.19535	16	2452581	2452977		1					0
ENSG00000164616	FBXL21	F-box and leucine rich repeat protein 21 (gene/pseudogene)	2.2798	10.4532	-1.19192	0.0039558	2.40277	-2.19696	5	135951112	135951432	1						0
ENSG00000145348	TBCK	TBC1 domain containing kinase	10.5058	48.1874	-1.79487	3.02045e-09	8.51993	-2.19748	4	106308961	106308989							1
ENSG00000207005	RNU1-2	RNA, U1 small nuclear 2	2.7295	12.5428	-1.17108	0.00307636	2.51196	-2.20015	1	16895980	16896143							1
ENSG00000204946 #or# ENSG00000244560 /// ENSG00000204946	ZNF783	zinc finger family member 783 #or# NA /// zinc finger family member 783	30.1359	138.5	-2.0029	3.70351e-21	20.4314	-2.20033	7	149293377	149293488							1
ENSG00000239704 #or# ENSG00000259024 /// ENSG00000175106 #or# ENSG00000239704 #or# ENSG00000259024	CDRT4	CMT1A duplicated region transcript 4 #or# TVP23C-CDRT4 readthrough /// trans-golgi network vesicle protein 23 homolog C #or# CMT1A duplicated region transcript 4 #or# TVP23C-CDRT4 readthrough	18.3185	84.2003	-1.92367	2.41242e-13	12.6175	-2.20052	17	15440239	15440285							1
ENSG00000268230 /// ENSG00000121410 #or# ENSG00000268230	AC012313.3	alpha-1-B glycoprotein #or# NA /// NA	22.7667	104.656	-1.99994	3.1411e-17	16.5029	-2.20066	19	58353021	58353197		1					0
ENSG00000168913	ENHO	energy homeostasis associated	41.7983	192.395	-2.0533	5.52571e-27	26.2576	-2.20255	9	34521040	34521464							1
ENSG00000100889	PCK2	phosphoenolpyruvate carboxykinase 2, mitochondrial	97.8394	450.381	-2.13573	1.26214e-55	54.8989	-2.20266	14	24103510	24103722							1
ENSG00000163884	KLF15	Kruppel like factor 15	24.452	112.607	-1.9855	5.94943e-18	17.2255	-2.20327	3	126352675	126352947							1
ENSG00000123689	G0S2	G0/G1 switch 2	7.70135	35.5378	-1.66142	3.76079e-07	6.42472	-2.20617	1	209675997	209676388							1
ENSG00000215102	TERF1P4	telomeric repeat binding factor 1 pseudogene 4	16.0418	74.0437	-1.89454	2.38479e-12	11.6226	-2.20654	0	83748825	83749939	1						0
ENSG00000100626	GALNT16	polypeptide N-acetylgalactosaminyltransferase 16	14.5438	67.1355	-1.86861	1.42425e-11	10.8464	-2.20667	14	69353771	69353968							1
ENSG00000180815	MAP3K15	mitogen-activated protein kinase kinase kinase 15	7.40053	34.1857	-1.73807	4.82396e-07	6.3166	-2.20769	0	19360679	19360748							1
ENSG00000196208	GREB1	growth regulating estrogen receptor binding 1	16.6008	76.7236	-1.91432	5.15512e-13	12.2878	-2.20842	2	11618288	11618300							1
ENSG00000206737	RNVU1-18	RNA, variant U1 small nuclear 18	2.69205	12.4497	-1.14037	0.00405179	2.39235	-2.20933	1	143729407	143729570							1
ENSG00000188177	ZC3H6	zinc finger CCCH-type containing 6	6.43024	29.7624	-1.67644	1.38749e-06	5.85777	-2.21055	2	112333977	112334261							1
ENSG00000223749	MIR503HG	MIR503 host gene	11.7769	54.5386	-1.83497	7.87872e-10	9.10354	-2.21132	0	134544426	134544797				1			0
ENSG00000118276	B4GALT6	beta-1,4-galactosyltransferase 6	18.6943	86.6618	-1.91894	4.52112e-14	13.3448	-2.2128	18	31666356	31666372							1
ENSG00000179673	RPRML	reprimo like	14.2461	66.0879	-1.84048	2.73901e-11	10.5624	-2.21382	17	46978156	46978644							1
ENSG00000131089	ARHGEF9	Cdc42 guanine nucleotide exchange factor 9	15.8899	73.7379	-1.89158	1.72801e-12	11.7625	-2.2143	0	63754284	63755070							1
ENSG00000232098	AC012313.1	NA	5.60788	26.0399	-1.63985	5.87799e-06	5.23077	-2.2152	19	58406559	58406770		1					0
ENSG00000184515	BEX5	brain expressed X-linked 5	21.3489	99.2121	-1.94715	4.19833e-16	15.3769	-2.21636	0	102154740	102154810							1
ENSG00000233460	RPL35AP31	ribosomal protein L35a pseudogene 31	5.49646	25.574	-1.53551	1.24191e-05	4.90591	-2.21811	13	71845981	71846317	1						0
ENSG00000141431	ASXL3	additional sex combs like 3, transcriptional regulator	3.47695	16.2144	-1.3588	0.000497584	3.30313	-2.22138	18	33661616	33661658							1
ENSG00000144040 /// ENSG00000135631 #or# ENSG00000144040	SFXN5	sideroflexin 5 /// RAB11 family interacting protein 5 #or# sideroflexin 5	14.3554	67.2466	-1.89817	5.41715e-12	11.2662	-2.22787	2	73058077	73058596							1
ENSG00000132470	ITGB4	integrin subunit beta 4	3.06471	14.3868	-1.3315	0.000827007	3.08249	-2.23092	17	75757322	75757818							1
ENSG00000183853	KIRREL1	kirre like nephrin family adhesion molecule 1	14.8416	70.6825	-1.93562	1.40488e-12	11.8524	-2.25171	1	158095121	158100262							1
ENSG00000229043	AC091729.3	NA	11.8174	56.3374	-1.81143	5.13505e-10	9.28945	-2.25318	7	1163343	1163491		1					0
ENSG00000244701 /// ENSG00000244701 #or# ENSG00000257093	AC004918.1	NA /// NA #or# KIAA1147	20.1892	96.3898	-2.01106	4.11448e-16	15.3857	-2.2553	7	141652381	141652883		1					0
ENSG00000153714	LURAP1L	leucine rich adaptor protein 1 like	2.13093	10.1748	-1.14164	0.00634411	2.19763	-2.25545	9	12777200	12777578							1
ENSG00000164620	RELL2	RELT like 2	11.6998	55.884	-1.89734	1.59499e-10	9.79724	-2.25595	5	141640671	141641053							1
ENSG00000260552	AC023043.1	NA	6.43024	30.7842	-1.74697	5.64535e-07	6.24831	-2.25924	18	36179996	36180390		1					0
ENSG00000171298	GAA	glucosidase alpha, acid	91.3373	437.91	-2.18414	5.03324e-54	53.2982	-2.26136	17	80119272	80119275							1
ENSG00000008513	ST3GAL1	ST3 beta-galactoside alpha-2,3-sialyltransferase 1	6.09503	29.2345	-1.65661	1.80061e-06	5.74458	-2.26197	8	133566982	133567320							1
ENSG00000128596	CCDC136	coiled-coil domain containing 136	9.64595	46.272	-1.78755	1.22214e-08	7.91288	-2.26214	7	128821799	128821885							1
ENSG00000175287 #or# ENSG00000251184 /// ENSG00000175287	PHYHD1	phytanoyl-CoA dioxygenase domain containing 1 /// phytanoyl-CoA dioxygenase domain containing 1 #or# NA	58.0596	282.429	-2.18711	4.62163e-41	40.3352	-2.28228	9	128941668	128941708							1
ENSG00000003147	ICA1	islet cell autoantigen 1	8.52371	41.5202	-1.78964	1.8502e-08	7.73278	-2.28426	7	8235927	8236005							1
ENSG00000181754	AMIGO1	adhesion molecule with Ig like domain 1	5.87125	28.6109	-1.55804	1.07734e-05	4.96765	-2.28482	1	109507068	109507430							1
ENSG00000115902	SLC1A4	solute carrier family 1 member 4	43.11	210.658	-2.12318	1.89593e-29	28.7222	-2.28881	2	65020912	65023863							1
ENSG00000102003	SYP	synaptophysin	25.4566	124.43	-2.12008	1.12647e-20	19.9483	-2.28922	0	49197377	49197839							1
ENSG00000143469	SYT14	synaptotagmin 14	3.88706	19.0039	-1.55076	4.80378e-05	4.31842	-2.28954	1	210161043	210162967							1
ENSG00000152969	JAKMIP1	janus kinase and microtubule interacting protein 1	2.9898	14.6212	-1.41512	0.000391811	3.40692	-2.28994	4	6062393	6062440							1
ENSG00000131899	LLGL1	LLGL1, scribble cell polarity complex component	33.3848	163.652	-2.17438	8.19322e-25	24.0865	-2.29336	17	18243908	18244875							1
ENSG00000171956	FOXB1	forkhead box B1	10.282	50.4892	-1.86575	1.28048e-09	8.89263	-2.29586	15	60041612	60041899							1
ENSG00000177042	TMEM80	transmembrane protein 80	45.1586	223.664	-2.20468	1.26843e-32	31.8967	-2.30826	11	703800	704129							1
ENSG00000185829	ARL17A	ADP ribosylation factor like GTPase 17A	21.1229	104.635	-2.05277	2.33153e-17	16.6324	-2.30848	17	46557253	46557630							1
ENSG00000108852	MPP2	membrane palmitoylated protein 2	33.0153	163.6	-2.10194	8.65202e-24	23.0629	-2.30897	17	43904461	43904493							1
ENSG00000178718	RPP25	ribonuclease P and MRP subunit p25	54.0623	268.044	-2.17545	3.87088e-39	38.4122	-2.30977	15	74954416	74955983							1
ENSG00000120318	ARAP3	ArfGAP with RhoGAP domain, ankyrin repeat and PH domain 3	2.58063	12.7976	-1.2996	0.00171317	2.7662	-2.31008	5	141672768	141672925							1
ENSG00000152128	TMEM163	transmembrane protein 163	5.31013	26.3914	-1.5648	8.48062e-06	5.07157	-2.31325	2	134455764	134456776							1
ENSG00000166501	PRKCB	protein kinase C beta	10.3194	51.2903	-1.82915	3.12707e-09	8.50486	-2.31332	16	24191420	24191588							1
ENSG00000184489	PTP4A3	protein tyrosine phosphatase type IVA, member 3	14.2056	70.6287	-1.98155	1.68982e-12	11.7722	-2.3138	8	141431045	141431520							1
ENSG00000137094	DNAJB5	DnaJ heat shock protein family (Hsp40) member B5	13.6475	67.9537	-1.93241	3.83789e-12	11.4159	-2.31591	9	34993200	34993233							1
ENSG00000152137	HSPB8	heat shock protein family B (small) member 8	10.2071	50.9574	-1.88309	1.68166e-09	8.77426	-2.31972	12	119193699	119193828							1
ENSG00000167972	ABCA3	ATP binding cassette subfamily A member 3	29.5352	148.107	-2.14093	1.67686e-21	20.7755	-2.32613	16	2323339	2323505							1
ENSG00000154162	CDH12	cadherin 12	2.7295	13.7015	-1.32258	0.000946658	3.02381	-2.32762	5	22278011	22278062							1
ENSG00000165512	ZNF22	zinc finger protein 22	42.0574	212.566	-2.20832	5.92474e-31	30.2273	-2.33748	10	45004044	45005326							1
ENSG00000188707	ZBED6CL	ZBED6 C-terminal like	15.5172	78.5146	-1.98347	6.28839e-14	13.2015	-2.33909	7	150331116	150332721							1
ENSG00000123240	OPTN	optineurin	27.369	138.649	-2.09292	1.19085e-22	21.9241	-2.34082	10	13136745	13136918							1
ENSG00000173404	INSM1	INSM transcriptional repressor 1	11.6685	59.3482	-1.90107	1.24699e-10	9.90414	-2.34658	20	20369801	20370949							1
ENSG00000178919	FOXE1	forkhead box E1	4.07553	20.7308	-1.53872	3.46968e-05	4.45971	-2.34672	9	97855037	97856715							1
ENSG00000177133	LINC00982	long intergenic non-protein coding RNA 982	3.02725	15.4054	-1.37832	0.000370842	3.43081	-2.34736	1	3064072	3064302			1				0
ENSG00000158296	SLC13A3	solute carrier family 13 member 3	6.24391	31.8161	-1.73895	5.83903e-07	6.23366	-2.34924	20	46608709	46608899							1
ENSG00000141576	RNF157	ring finger protein 157	31.0676	158.514	-2.17483	1.13551e-24	23.9448	-2.35113	17	76211877	76212351							1
ENSG00000238247	AC006210.2	NA	8.63513	44.0631	-1.92554	5.30837e-09	8.27504	-2.35128	0	27518791	27519759		1					0
ENSG00000181409	AATK	apoptosis associated tyrosine kinase	3.5144	18.0965	-1.48273	9.75959e-05	4.01057	-2.36436	17	81134368	81134501							1
ENSG00000140057	AK7	adenylate kinase 7	2.87838	14.8434	-1.4396	0.000342348	3.46553	-2.36649	14	96488018	96488275							1
ENSG00000214870	AC004540.1	NA	1.9446	10.0525	-1.10172	0.00702079	2.15361	-2.37	7	26493795	26494114		1					0
ENSG00000198732	SMOC1	SPARC related modular calcium binding 1	25.9834	134.457	-2.1468	2.19859e-21	20.6579	-2.37148	14	70011485	70011568							1
ENSG00000219607	PPP1R3G	protein phosphatase 1 regulatory subunit 3G	3.47695	17.9967	-1.45337	0.000165208	3.78197	-2.37184	6	5086563	5089487							1
ENSG00000272114	AL136131.3	NA	1.98205	10.2772	-1.1986	0.00390623	2.40824	-2.37438	6	43770429	43770616		1					0
ENSG00000234284	ZNF879	zinc finger protein 879	2.7295	14.158	-1.37147	0.000651127	3.18633	-2.37491	5	179024438	179025004							1
ENSG00000051108 #or# ENSG00000261270 /// ENSG00000051108	HERPUD1	homocysteine inducible ER protein with ubiquitin like domain 1 /// homocysteine inducible ER protein with ubiquitin like domain 1 #or# NA	199.645	1036.33	-2.32705	1.07769e-113	112.968	-2.37597	16	56943126	56943407							1
ENSG00000264107	AC138207.2	NA	2.35471	12.275	-1.34762	0.00124063	2.90636	-2.38211	17	31090787	31090935		1					0
ENSG00000134207	SYT6	synaptotagmin 6	2.69205	14.0556	-1.40292	0.000532324	3.27382	-2.38437	1	114152687	114152922							1
ENSG00000100167	SEPT3	septin 3	12.5992	65.864	-1.96883	3.17824e-12	11.4978	-2.38615	22	41987622	41987689							1
ENSG00000132016	C19orf57	chromosome 19 open reading frame 57	4.86043	25.4171	-1.67197	3.66842e-06	5.43552	-2.38664	19	13904893	13904913							1
ENSG00000196155	PLEKHG4	pleckstrin homology and RhoGEF domain containing G4	27.4813	143.778	-2.17028	1.30756e-22	21.8835	-2.38731	16	67288803	67289072							1
ENSG00000130005	GAMT	guanidinoacetate N-methyltransferase	104.909	551.432	-2.31726	1.15619e-73	72.937	-2.39405	19	1398600	1398675							1
ENSG00000095596	CYP26A1	cytochrome P450 family 26 subfamily A member 1	3.29062	17.2977	-1.36445	0.000334782	3.47524	-2.39415	10	93076963	93077082							1
ENSG00000139182	CLSTN3	calsyntenin 3	13.684	72.0168	-2.01426	8.18686e-13	12.0869	-2.39584	12	7157941	7158305							1
ENSG00000247746	USP51	ubiquitin specific peptidase 51	4.82297	25.4113	-1.63209	4.50846e-06	5.34597	-2.39748	0	55486804	55486806							1
ENSG00000170382	LRRN2	leucine rich repeat neuronal 2	2.7295	14.3854	-1.33808	0.000735268	3.13355	-2.3979	1	204619900	204620218							1
ENSG00000214756	CSKMT	citrate synthase lysine methyltransferase	38.5056	203.443	-2.27077	2.05596e-31	30.687	-2.40148	11	62665336	62665711							1
ENSG00000174672	BRSK2	BR serine/threonine kinase 2	27.1774	144.498	-2.22397	7.56193e-24	23.1214	-2.41057	11	1459192	1459447							1
ENSG00000181192	DHTKD1	dehydrogenase E1 and transketolase domain containing 1	46.1735	245.633	-2.27266	1.82236e-35	34.7394	-2.41137	10	12120182	12120359							1
ENSG00000206652	RNU1-1	RNA, U1 small nuclear 1	2.69205	14.3393	-1.36103	0.000677863	3.16886	-2.4132	1	16514122	16514285							1
ENSG00000198855	FICD	FIC domain containing	11.7769	62.8977	-1.98414	5.62314e-12	11.25	-2.41705	12	108525589	108525837							1
ENSG00000235961	PNMA6A	PNMA family member 6A	26.4675	141.528	-2.1983	6.01984e-23	22.2204	-2.41879	0	153074263	153075018							1
ENSG00000167889	MGAT5B	mannosyl (alpha-1,6-)-glycoprotein beta-1,6-N-acetyl-glucosaminyltransferase, isozyme B	2.91583	15.5995	-1.42966	0.000284775	3.5455	-2.41952	17	76948640	76950393							1
ENSG00000088899	LZTS3	leucine zipper tumor suppressor family member 3	22.3232	119.744	-2.15325	1.08734e-19	18.9636	-2.42333	20	3162618	3164453							1
ENSG00000136367	ZFHX2	zinc finger homeobox 2	4.26185	22.8754	-1.63927	9.34267e-06	5.02953	-2.42425	14	23535326	23535374							1
ENSG00000162545	CAMK2N1	calcium/calmodulin dependent protein kinase II inhibitor 1	20.4129	110.051	-2.17733	3.67986e-19	18.4342	-2.43061	1	20483187	20483719							1
ENSG00000254402	LRRC24	leucine rich repeat containing 24	5.72024	30.8555	-1.74207	6.63994e-07	6.17784	-2.43138	8	144522439	144522474							1
ENSG00000156587	UBE2L6	ubiquitin conjugating enzyme E2 L6	3.7747	20.3789	-1.55291	2.86891e-05	4.54228	-2.43264	11	57567058	57567303							1
ENSG00000003137	CYP26B1	cytochrome P450 family 26 subfamily B member 1	3.5144	19.0136	-1.56682	4.58705e-05	4.33847	-2.43568	2	72144367	72144415							1
ENSG00000125355	TMEM255A	transmembrane protein 255A	7.29218	39.5352	-1.83727	2.24309e-08	7.64915	-2.43872	0	120309893	120310128							1
ENSG00000280161	AC022413.1	NA	7.62644	41.6801	-1.87039	3.77634e-08	7.42293	-2.45028	5	180810401	180811384		1					0
ENSG00000130508	PXDN	peroxidasin	18.0957	98.9878	-2.12298	2.26871e-17	16.6442	-2.45161	2	1680253	1680362							1
ENSG00000123388	HOXC11	homeobox C11	14.4293	79.0305	-2.11668	4.34471e-15	14.362	-2.45341	12	53975632	53976419							1
ENSG00000149548	CCDC15	coiled-coil domain containing 15	5.86818	32.219	-1.82571	1.55346e-07	6.8087	-2.45693	11	125038921	125039549							1
ENSG00000105357	MYH14	myosin heavy chain 14	22.472	123.836	-2.14639	1.15239e-18	17.9384	-2.46222	19	50308315	50310539							1
ENSG00000174705	SH3PXD2B	SH3 and PX domains 2B	14.6187	80.8195	-2.09273	4.46418e-15	14.3503	-2.46688	5	172333499	172338368							1
ENSG00000254290	AC124067.4	NA	1.9446	10.8051	-1.23838	0.0031175	2.50619	-2.47417	8	37597635	37597736		1					0
ENSG00000152932	RAB3C	RAB3C, member RAS oncogene family	3.5144	19.5841	-1.556	3.65169e-05	4.43751	-2.47833	5	58851164	58851527							1
ENSG00000114923	SLC4A3	solute carrier family 4 member 3	1.9446	10.9204	-1.1938	0.0041621	2.38069	-2.48948	2	219635673	219635781							1
ENSG00000135740 /// ENSG00000135740 #or# ENSG00000262691	SLC9A5	solute carrier family 9 member A5 #or# NA /// solute carrier family 9 member A5	3.4395	19.3501	-1.60815	4.61361e-05	4.33596	-2.49207	16	67270738	67270980							1
ENSG00000141756	FKBP10	FK506 binding protein 10	200.378	1133.09	-2.48531	3.49777e-128	127.456	-2.49947	17	41822223	41822540							1
ENSG00000259343	TMC3-AS1	TMC3 antisense RNA 1	5.12167	29.0115	-1.73644	7.14994e-07	6.1457	-2.50194	15	81516503	81518200							1
ENSG00000175711	B3GNTL1	UDP-GlcNAc:betaGal beta-1,3-N-acetylglucosaminyltransferase like 1	10.5432	60.2629	-2.05758	6.96615e-12	11.157	-2.51496	17	83030761	83030902							1
ENSG00000185837	HDHD5-AS1	HDHD5 antisense RNA 1	2.09347	11.9935	-1.40401	0.000747662	3.12629	-2.51829	22	17165269	17165445							1
ENSG00000173821	RNF213	ring finger protein 213	17.4201	99.8305	-2.23873	1.69999e-18	17.7696	-2.51873	17	80389828	80389888							1
ENSG00000204304	PBX2	PBX homeobox 2	22.0567	127.038	-2.28401	1.39061e-18	17.8568	-2.52597	6	32188280	32188504							1
ENSG00000211445	GPX3	glutathione peroxidase 3	28.0019	161.349	-2.29309	1.76762e-27	26.7526	-2.52658	5	151027909	151027985							1
ENSG00000169621	APLF	aprataxin and PNKP like factor	3.62583	20.8993	-1.68031	8.90303e-06	5.05046	-2.52707	2	68655574	68655576							1
ENSG00000117245	KIF17	kinesin family member 17	13.1208	75.775	-2.17951	2.00464e-14	13.698	-2.52987	1	20672016	20672196							1
ENSG00000181045	SLC26A11	solute carrier family 26 member 11	15.2164	88.1007	-2.16047	2.98949e-15	14.5244	-2.53353	17	80252625	80252899							1
ENSG00000164707	SLC13A4	solute carrier family 13 member 4	8.4488	48.92	-1.96318	4.29177e-10	9.36736	-2.53361	7	135727497	135727694							1
ENSG00000184226	PCDH9	protocadherin 9	48.4533	280.926	-2.39422	9.47209e-43	42.0236	-2.53552	13	67201015	67225341							1
ENSG00000160323	ADAMTS13	ADAM metallopeptidase with thrombospondin type 1 motif 13	10.9555	63.5671	-2.07232	3.43882e-12	11.4636	-2.53663	9	133459181	133459386							1
ENSG00000118004	COLEC11	collectin subfamily member 11	2.58063	14.995	-1.43974	0.00035845	3.44557	-2.53869	2	3644119	3644446							1
ENSG00000206596	RNU1-27P	RNA, U1 small nuclear 27, pseudogene	3.5144	20.4467	-1.63317	1.8679e-05	4.72865	-2.54051	14	34546714	34546877	1						0
ENSG00000237594	AP000251.1	NA	19.7769	115.546	-2.27004	1.99014e-20	19.7011	-2.54658	21	31560017	31560487		1					0
ENSG00000188747	NOXA1	NADPH oxidase activator 1	5.83379	34.1495	-1.81155	1.13028e-07	6.94682	-2.54936	9	137434361	137434405		1					0
ENSG00000168765	GSTM4	glutathione S-transferase mu 4	5.87125	34.3968	-1.70312	3.16934e-07	6.49903	-2.55054	1	109661165	109661700							1
ENSG00000102445	RUBCNL	RUN and cysteine rich domain containing beclin 1 interacting protein like	2.16838	12.7312	-1.34033	0.00112166	2.95014	-2.55368	13	46372476	46372597							1
ENSG00000125895	TMEM74B	transmembrane protein 74B	6.84248	40.5507	-1.92174	4.03917e-09	8.39371	-2.56714	20	1181284	1181587							1
ENSG00000231434	AL365440.1	NA	176.202	1047.71	-2.52313	2.06529e-104	103.685	-2.57194	1	158523672	158525838		1					0
ENSG00000116962	NID1	nidogen 1	45.3167	271.644	-2.41138	9.25929e-42	41.0334	-2.5836	1	235975830	235977866							1
as__ENSG00000090554 #or# as__ENSG00000269469 /// as__ENSG00000090554 #or# as__ENSG00000273189 /// ENSG00000090554 #or# ENSG00000273189 /// ENSG00000090554 #or# ENSG00000269469	AC010619.1	fms related tyrosine kinase 3 ligand #or# NA	5.87125	35.2196	-1.83919	5.44693e-08	7.26385	-2.58464	19	49485964	49486231		1					0
ENSG00000185633	NDUFA4L2	NDUFA4, mitochondrial complex associated like 2	1.98205	11.9324	-1.30319	0.00182282	2.73926	-2.58981	12	57239546	57240495							1
ENSG00000184743	ATL3	atlastin GTPase 3	22.8042	137.693	-2.35119	3.65301e-24	23.4373	-2.59409	11	63659038	63659252							1
ENSG00000104177	MYEF2	myelin expression factor 2	16.4863	100.078	-2.25795	7.18152e-19	18.1438	-2.60178	15	48162719	48162893							1
ENSG00000273416	AL732292.2	NA	1.9446	11.814	-1.44036	0.000577279	3.23861	-2.60296	1	235104180	235104609		1					0
ENSG00000129910	CDH15	cadherin 15	2.95328	17.9649	-1.5109	7.49733e-05	4.12509	-2.60479	16	89195156	89195492							1
ENSG00000112659	CUL9	cullin 9	7.10278	43.3859	-2.00353	6.9993e-10	9.15495	-2.61077	6	43224250	43224584							1
ENSG00000134709	HOOK1	hook microtubule tethering protein 1	33.4214	204.889	-2.43786	6.03248e-34	33.2195	-2.616	1	59872795	59872982							1
ENSG00000119711	ALDH6A1	aldehyde dehydrogenase 6 family member A1	32.5625	199.703	-2.42494	8.63906e-30	29.0635	-2.61658	14	74071878	74072364							1
ENSG00000181513	ACBD4	acyl-CoA binding domain containing 4	10.0926	62.3415	-2.16314	6.54357e-13	12.1842	-2.6269	17	45138276	45138544							1
ENSG00000147100	SLC16A2	solute carrier family 16 member 2	10.3559	64.0804	-2.10442	7.1161e-13	12.1478	-2.62942	0	74531411	74532608							1
ENSG00000184702 #or# ENSG00000284874 /// ENSG00000184702 #or# ENSG00000203618 #or# ENSG00000284874 /// ENSG00000184702	SEPT5	septin 5 /// septin 5 #or# NA /// septin 5 #or# glycoprotein Ib platelet subunit beta #or# NA	18.0604	111.795	-2.2311	1.20424e-18	17.9193	-2.62996	22	19723854	19724224							1
ENSG00000155961	RAB39B	RAB39B, member RAS oncogene family	15.9638	98.9302	-2.26635	1.84821e-18	17.7332	-2.6316	0	155258241	155260802							1
ENSG00000171056	SOX7	SRY-box 7	7.73881	48.3921	-2.08816	1.15043e-10	9.93914	-2.64459	8	10723768	10725737							1
ENSG00000128918	ALDH1A2	aldehyde dehydrogenase 1 family member A2	20.0777	125.723	-2.33877	9.63548e-23	22.0161	-2.64658	15	58257448	58257555							1
ENSG00000186814	ZSCAN30	zinc finger and SCAN domain containing 30	8.78708	55.2256	-2.07651	2.26538e-11	10.6449	-2.65188	18	35289345	35289823							1
ENSG00000106004	HOXA5	homeobox A5	68.531	431.234	-2.54991	2.35876e-57	56.6273	-2.65364	7	27141807	27142085							1
ENSG00000164308	ERAP2	endoplasmic reticulum aminopeptidase 2	1.98205	12.5689	-1.38276	0.000686125	3.1636	-2.66479	5	96915806	96915849							1
ENSG00000185745	IFIT1	interferon induced protein with tetratricopeptide repeats 1	1.98205	12.5715	-1.32421	0.00099705	3.00128	-2.6651	10	89403713	89406486							1
ENSG00000072832	CRMP1	collapsin response mediator protein 1	12.261	77.792	-2.2349	7.25474e-15	14.1394	-2.66555	4	5821243	5821759							1
ENSG00000081479	LRP2	LDL receptor related protein 2	6.20645	39.5861	-1.96262	3.28412e-09	8.48358	-2.67315	2	169271000	169271107							1
ENSG00000118495 /// ENSG00000118495 #or# ENSG00000283122	PLAGL1	PLAG1 like zinc finger 1 /// PLAG1 like zinc finger 1 #or# hydatidiform mole associated and imprinted (non-protein coding)	41.7244	266.765	-2.51052	4.20652e-42	41.3761	-2.67661	6	143968609	143968978							1
ENSG00000250133	HOXC-AS2	HOXC cluster antisense RNA 2	2.87838	18.5153	-1.61607	3.45883e-05	4.46107	-2.68539	12	53995208	53995518							1
ENSG00000198723	TEX45	testis expressed 45	1.9446	12.6141	-1.40576	0.000574908	3.2404	-2.69749	19	7508206	7508447							1
ENSG00000237149	ZNF503-AS2	ZNF503 antisense RNA 2	22.3597	146.724	-2.39465	5.63402e-26	25.2492	-2.71413	10	75407255	75407694							1
ENSG00000253123	AC091182.1	NA	12.0037	79.0632	-2.2296	3.38874e-15	14.47	-2.71952	8	37330672	37331166		1					0
ENSG00000267939	AC008946.1	NA	2.13093	14.0361	-1.59848	9.83201e-05	4.00736	-2.71959	19	8015653	8016025		1					0
ENSG00000203685	STUM	stum, mechanosensory transduction mediator homolog	2.16838	14.3234	-1.58371	0.000106783	3.9715	-2.72368	1	226602006	226602194							1
ENSG00000229415 /// ENSG00000229415 #or# ENSG00000257520	SFTA3	surfactant associated 3 #or# NA /// surfactant associated 3	1.53235	10.2847	-1.31081	0.00169481	2.77088	-2.74668	14	36477019	36477103							1
ENSG00000225096	AL445250.1	NA	5.459	36.6734	-1.95253	7.3442e-09	8.13406	-2.74803	6	58187226	58188234		1					0
ENSG00000230091	TMEM254-AS1	TMEM254 antisense RNA 1	1.4949	10.0551	-1.29872	0.00231482	2.63548	-2.74981	10	80047722	80049178							1
ENSG00000120075	HOXB5	homeobox B5	12.6367	85.0842	-2.31675	2.13322e-17	16.671	-2.75127	17	48591257	48592208							1
ENSG00000253414	AC124067.2	NA	5.459	36.8348	-1.95535	6.41128e-09	8.19306	-2.75436	8	37516410	37516700		1					0
ENSG00000178026	LRRC75B	leucine rich repeat containing 75B	12.1495	82.378	-2.3309	8.40103e-17	16.0757	-2.76136	22	24589406	24589613							1
ENSG00000182612	TSPAN10	tetraspanin 10	5.41942	36.9643	-1.99195	9.36133e-09	8.02866	-2.76992	17	81648292	81648294							1
ENSG00000100206	DMC1	DNA meiotic recombinase 1	12.9719	88.9154	-2.35985	3.1601e-18	17.5003	-2.77704	22	38569284	38569390							1
ENSG00000266714	MYO15B	myosin XVB	2.7295	18.7911	-1.74838	9.9831e-06	5.00073	-2.78334	17	75626407	75626501							1
ENSG00000185100	ADSSL1	adenylosuccinate synthase like 1	2.87838	19.8745	-1.65416	1.91532e-05	4.71776	-2.78759	14	104747004	104747107							1
ENSG00000139915	MDGA2	MAM domain containing glycosylphosphatidylinositol anchor 2	3.84961	26.8267	-1.95361	1.24419e-07	6.90511	-2.80088	14	47299347	47299539							1
ENSG00000140682	TGFB1I1	transforming growth factor beta 1 induced transcript 1	5.27267	36.7666	-2.00353	5.4705e-09	8.26197	-2.80179	16	31477310	31477906							1
ENSG00000175161	CADM2	cell adhesion molecule 2	1.9446	13.5889	-1.41484	0.000425024	3.37159	-2.80488	3	86066781	86066783							1
ENSG00000237854	LINC00674	long intergenic non-protein coding RNA 674	2.09347	14.6824	-1.47729	0.000205471	3.68725	-2.81012	17	68115061	68115518			1				0
ENSG00000186496	ZNF396	zinc finger protein 396	2.2798	16.0278	-1.65529	3.73393e-05	4.42783	-2.81359	18	35374293	35374364							1
ENSG00000065621	GSTO2	glutathione S-transferase omega 2	5.98054	42.338	-2.11099	3.90925e-10	9.40791	-2.8236	10	104299128	104299411							1
ENSG00000196668	LINC00173	long intergenic non-protein coding RNA 173	2.2798	16.1559	-1.66124	3.2815e-05	4.48393	-2.82508	12	116536353	116536518			1				0
ENSG00000204252	HLA-DOA	major histocompatibility complex, class II, DO alpha	6.87993	48.8894	-2.11353	2.84243e-10	9.54631	-2.82906	6	33008061	33008404							1
ENSG00000070540	WIPI1	WD repeat domain, phosphoinositide interacting 1	9.15974	65.1889	-2.23718	8.81501e-14	13.0548	-2.83125	17	68433509	68433575							1
ENSG00000100979	PLTP	phospholipid transfer protein	19.1065	136.554	-2.47642	4.9552e-25	24.3049	-2.83733	20	45898806	45898940							1
ENSG00000272172	AC138696.2	NA	2.69205	19.3044	-1.67545	1.3899e-05	4.85702	-2.84215	8	143290399	143290621		1					0
ENSG00000165905	LARGE2	LARGE xylosyl- and glucuronyltransferase 2	7.58993	54.4512	-2.19565	5.75831e-12	11.2397	-2.8428	11	45928925	45929096							1
ENSG00000196517	SLC6A9	solute carrier family 6 member 9	21.8704	157.347	-2.53494	2.66965e-25	24.5735	-2.8469	1	44014630	44014843							1
ENSG00000232611	AL683813.1	NA	1.53235	11.1283	-1.48837	0.00041244	3.38464	-2.86041	0	136840931	136842850		1					0
ENSG00000231327	LINC01816	long intergenic non-protein coding RNA 1816	2.13093	15.5256	-1.55373	0.000106759	3.9716	-2.86509	2	70124036	70124425			1				0
ENSG00000248794	AC026436.1	NA	24.2647	177.921	-2.58827	9.54548e-32	31.0202	-2.87431	5	81242330	81242599		1					0
ENSG00000137691	CFAP300	cilia and flagella associated protein 300	2.09347	15.3637	-1.5735	8.51536e-05	4.0698	-2.87556	11	102076050	102076111							1
ENSG00000101871	MID1	midline 1	91.5215	672.269	-2.79778	1.003e-92	91.9987	-2.87686	0	10567548	10567603							1
ENSG00000131668	BARX1	BARX homeobox 1	11.1387	82.2858	-2.40179	5.00371e-17	16.3007	-2.88506	9	93951627	93952163							1
ENSG00000108830	RND2	Rho family GTPase 2	21.91	162.779	-2.54059	1.06967e-28	27.9708	-2.89326	17	43028681	43032036							1
ENSG00000197444	OGDHL	oxoglutarate dehydrogenase like	9.38565	69.9213	-2.28026	3.27174e-14	13.4852	-2.8972	10	49756590	49756946							1
ENSG00000162738	VANGL2	VANGL planar cell polarity protein 2	8.85891	66.1846	-2.33039	2.84986e-14	13.5452	-2.90129	1	160424052	160424147							1
ENSG00000133134	BEX2	brain expressed X-linked 2	92.0888	689.025	-2.80073	2.64498e-96	95.5776	-2.90346	0	103309977	103309981							1
ENSG00000249116	AC025183.1	NA	1.34602	10.1088	-1.40144	0.000981787	3.00798	-2.90883	5	1884480	1884649		1					0
ENSG00000143847	PPFIA4	PTPRF interacting protein alpha 4	1.38348	10.4053	-1.35154	0.00137061	2.86309	-2.91094	1	203076480	203076981							1
ENSG00000123570	RAB9B	RAB9B, member RAS oncogene family	4.55961	34.3126	-2.04084	5.96956e-09	8.22406	-2.91176	0	103822322	103825178							1
ENSG00000105767	CADM4	cell adhesion molecule 4	5.9087	44.745	-2.08921	2.0789e-10	9.68217	-2.92081	19	43624836	43624903							1
ENSG00000196204 #or# ENSG00000272968	RBAK-RBAKDN	ring finger protein 216 pseudogene 1 #or# RBAK-RBAKDN readthrough	2.84092	21.5828	-1.84158	2.56943e-06	5.59016	-2.92545	7	5072922	5073221							1
ENSG00000258136	AC007622.2	NA	1.34602	10.2763	-1.49155	0.000517707	3.28592	-2.93255	12	107759772	107759968		1					0
ENSG00000184898	RBM43	RNA binding motif protein 43	1.98205	15.1399	-1.59873	7.73287e-05	4.11166	-2.93329	2	151260985	151261305							1
ENSG00000154537	FAM27C	family with sequence similarity 27 member C	4.52522	34.646	-1.98085	1.96281e-08	7.70712	-2.93663	9	61854931	61855331							1
ENSG00000261474	AC026471.4	NA	1.34602	10.3313	-1.42428	0.000827484	3.08224	-2.94025	16	31449535	31449773		1					0
ENSG00000244355 #or# ENSG00000250641 /// ENSG00000250641	LY6G6F-LY6G6D	LY6G6F-LY6G6D readthrough /// lymphocyte antigen 6 family member G6D #or# LY6G6F-LY6G6D readthrough	2.13093	16.3877	-1.57195	5.02463e-05	4.2989	-2.94306	6	31717805	31717918							1
ENSG00000103241	FOXF1	forkhead box F1	8.52371	65.7466	-2.33222	5.07386e-14	13.2947	-2.94736	16	86513086	86515418							1
ENSG00000236609	ZNF853	zinc finger protein 853	6.87993	53.1755	-2.23011	2.10962e-12	11.6758	-2.95029	7	6622972	6624290							1
ENSG00000231050	AL109917.1	NA	2.3943	18.5531	-1.6743	2.43227e-05	4.61399	-2.95399	1	1892134	1892658		1					0
ENSG00000064012	CASP8	caspase 8	4.07553	31.6344	-1.94488	2.69757e-08	7.56903	-2.95644	2	201286595	201287092							1
ENSG00000260230	FRRS1L	ferric chelate reductase 1 like	2.54317	19.9254	-1.62867	1.48919e-05	4.82705	-2.96991	9	109141561	109141589							1
ENSG00000102981	PARD6A	par-6 family cell polarity regulator alpha	2.7295	21.5243	-1.71619	5.39365e-06	5.26812	-2.97926	16	67661896	67662730							1
ENSG00000280374	AC019080.5	NA	1.34602	10.615	-1.41735	0.000920345	3.03605	-2.97933	2	177317715	177318471		1					0
ENSG00000136014	USP44	ubiquitin specific peptidase 44	2.2798	18.0331	-1.70585	1.15832e-05	4.93617	-2.98367	12	95546450	95546990							1
ENSG00000077092	RARB	retinoic acid receptor beta	4.74901	37.8592	-2.13581	8.74799e-10	9.05809	-2.99495	3	25596617	25597932							1
ENSG00000148798	INA	internexin neuronal intermediate filament protein alpha	24.1533	195.973	-2.71573	3.32056e-35	34.4788	-3.02036	10	103288670	103290351							1
ENSG00000148832 #or# ENSG00000254536 /// ENSG00000148832	PAOX	polyamine oxidase /// polyamine oxidase #or# NA	3.02725	24.5651	-1.87403	4.67054e-07	6.33063	-3.02053	10	133391312	133391663							1
ENSG00000206530	CFAP44	cilia and flagella associated protein 44	2.2798	18.5588	-1.82166	3.98649e-06	5.39941	-3.02512	3	113433665	113433669							1
ENSG00000207389	RNU1-4	RNA, U1 small nuclear 4	1.9446	15.8806	-1.52084	0.00010986	3.95916	-3.02972	1	16740516	16740679							1
ENSG00000223802	CERS1	ceramide synthase 1	21.6101	177.494	-2.72248	1.59961e-32	31.796	-3.03799	19	18877917	18878016							1
ENSG00000170542	SERPINB9	serpin family B member 9	1.34602	11.0804	-1.32564	0.00116209	2.93476	-3.04123	6	2887266	2890162							1
ENSG00000155660	PDIA4	protein disulfide isomerase family A member 4	605.915	4992.81	-2.9836	5.27752e-128	127.278	-3.04266	7	149028409	149028468							1
ENSG00000122378	FAM213A	family with sequence similarity 213 member A	52.4904	434.003	-2.89528	6.07018e-71	70.2168	-3.04758	10	80432100	80432997							1
ENSG00000263004	AC007114.1	NA	1.9446	16.1031	-1.54003	8.05122e-05	4.09414	-3.04979	17	57079147	57079410		1					0
ENSG00000159921	GNE	glucosamine (UDP-N-acetyl)-2-epimerase/N-acetylmannosamine kinase	16.5259	137.73	-2.65883	5.79741e-27	26.2368	-3.05904	9	36264973	36265416							1
ENSG00000272079	AC004233.3	NA	3.1792	26.547	-1.8596	3.75384e-07	6.42552	-3.06181	16	3006120	3007388		1					0
ENSG00000153406	NMRAL1	NmrA like redox sensor 1	24.7862	208.307	-2.79385	1.14122e-37	36.9426	-3.0711	16	4474684	4474792							1
ENSG00000203930	LINC00632	long intergenic non-protein coding RNA 632	2.13093	18.0534	-1.6864	1.36608e-05	4.86452	-3.08272	0	140772078	140772679			1				0
ENSG00000120068	HOXB8	homeobox B8	12.897	110.747	-2.68695	7.84721e-23	22.1053	-3.10216	17	48613188	48613201							1
ENSG00000212464	SNORA12	small nucleolar RNA, H/ACA box 12	4.52522	38.9337	-2.01473	1.89387e-09	8.72265	-3.10496	10	100237156	100237302					1		0
ENSG00000182463	TSHZ2	teashirt zinc finger homeobox 2	2.09347	18.2605	-1.6868	1.26192e-05	4.89897	-3.12476	20	53489203	53489625							1
ENSG00000249784	SCARNA22	small Cajal body-specific RNA 22	10.3559	91.1167	-2.15852	4.59231e-09	8.33797	-3.13726	4	1974636	1974760							1
ENSG00000255387	AC015689.2	NA	2.13093	18.8003	-1.86674	4.00191e-06	5.39773	-3.14121	11	4210354	4212091		1					0
ENSG00000204815	TTC25	tetratricopeptide repeat domain 25	1.34602	11.8849	-1.4711	0.000406214	3.39124	-3.14236	17	41936762	41937041							1
ENSG00000158286	RNF207	ring finger protein 207	1.34602	12.0569	-1.40676	0.000560936	3.25109	-3.16308	1	6219236	6219343							1
ENSG00000166707	ZCCHC18	zinc finger CCHC-type containing 18	2.2798	20.5681	-1.83145	1.84708e-06	5.73352	-3.17343	0	104113434	104113580							1
ENSG00000148057	IDNK	IDNK, gluconokinase	1.79572	16.2254	-1.61079	5.11217e-05	4.29139	-3.17562	9	83643781	83643904							1
ENSG00000249550	LINC01234	long intergenic non-protein coding RNA 1234	3.8892	35.4402	-2.07473	4.83921e-09	8.31523	-3.18784	12	113751014	113752188			1				0
ENSG00000252481	SCARNA13	small Cajal body-specific RNA 13	1.38348	12.7316	-1.44301	0.000390109	3.40881	-3.20204	14	95533355	95533629							1
ENSG00000179314	WSCD1	WSC domain containing 1	6.09503	56.3888	-2.34755	1.42677e-13	12.8456	-3.2097	17	6087970	6088066							1
ENSG00000147257	GPC3	glypican 3	20.3411	190.012	-2.84901	8.10558e-36	35.0912	-3.22362	0	133596366	133596431							1
ENSG00000260267	AC026471.1	NA	1.98205	18.5517	-1.69897	1.02323e-05	4.99003	-3.22649	16	31456711	31459736		1					0
ENSG00000008300	CELSR3	cadherin EGF LAG seven-pass G-type receptor 3	9.34607	88.0107	-2.66397	8.60228e-20	19.0654	-3.23525	3	48640484	48640559							1
ENSG00000004139	SARM1	sterile alpha and TIR motif containing 1	17.8719	168.422	-2.82446	4.35137e-29	28.3614	-3.23632	17	28396031	28396820							1
ENSG00000148600	CDHR1	cadherin related family member 1	3.29062	31.4123	-2.05737	1.57852e-08	7.80175	-3.2549	10	84219354	84219621							1
ENSG00000161267	BDH1	3-hydroxybutyrate dehydrogenase 1	1.4949	14.4994	-1.59994	5.7393e-05	4.24114	-3.27787	3	197554369	197554713							1
ENSG00000158050	DUSP2	dual specificity phosphatase 2	1.98205	19.241	-1.78298	4.13839e-06	5.38317	-3.27912	2	96143729	96144037							1
ENSG00000103528	SYT17	synaptotagmin 17	1.34602	13.0968	-1.51945	0.000222013	3.65362	-3.28244	16	19267077	19267118							1
ENSG00000099958	DERL3	derlin 3	74.0287	721.641	-3.15947	1.05353e-104	103.977	-3.28513	22	23836767	23837154							1
ENSG00000176971	FIBIN	fin bud initiation factor homolog (zebrafish)	1.19715	11.7244	-1.39952	0.000762503	3.11776	-3.29185	11	26995163	26996121							1
ENSG00000278970	HEIH	hepatocellular carcinoma up-regulated EZH2-associated long non-coding RNA	3.81216	37.5051	-2.27961	1.3154e-10	9.88094	-3.29841	5	180829954	180831605							1
ENSG00000140968 #or# ENSG00000274134 /// ENSG00000140968	IRF8	interferon regulatory factor 8 #or# microRNA 6774 /// interferon regulatory factor 8	1.98205	19.5943	-1.83744	2.91486e-06	5.53538	-3.30537	16	85918417	85918427							1
ENSG00000278703	AC100847.1	NA	1.34602	13.3699	-1.58424	0.000106112	3.97424	-3.31221	18	57588611	57589091		1					0
ENSG00000227848	SUCLA2-AS1	SUCLA2 antisense RNA 1	1.34602	13.4306	-1.62287	8.67853e-05	4.06155	-3.31875	13	48002435	48002552							1
ENSG00000107562	CXCL12	C-X-C motif chemokine ligand 12	4.41073	44.0947	-2.3333	1.02605e-11	10.9888	-3.32151	10	44380411	44380880							1
ENSG00000269814	AC008403.3	NA	1.19715	11.9935	-1.43944	0.000471987	3.32607	-3.32458	19	48513207	48513660		1					0
ENSG00000188687 #or# ENSG00000264324 /// ENSG00000188687	SLC4A5	solute carrier family 4 member 5 /// solute carrier family 4 member 5 #or# NA	2.09347	20.9799	-1.89148	1.25308e-06	5.90202	-3.32504	2	74315024	74315025							1
ENSG00000072133	RPS6KA6	ribosomal protein S6 kinase A6	6.39278	64.8122	-2.53245	8.18308e-16	15.0871	-3.34175	0	84156075	84156191							1
ENSG00000167861	HID1	HID1 domain containing	6.5042	66.4785	-2.5261	7.05549e-16	15.1515	-3.35344	17	74963771	74963910							1
ENSG00000083720	OXCT1	3-oxoacid CoA-transferase 1	19.144	196.128	-2.93318	3.19779e-36	35.4952	-3.35684	5	41749601	41749607							1
ENSG00000181444	ZNF467	zinc finger protein 467	1.98205	20.3155	-1.82809	2.02158e-06	5.69431	-3.35752	7	149764363	149764713							1
ENSG00000131477	RAMP2	receptor activity modifying protein 2	2.2798	23.5376	-1.88573	5.00807e-07	6.30033	-3.36799	17	42762773	42763002							1
ENSG00000198963	RORB	RAR related orphan receptor B	1.56981	16.229	-1.7482	1.48501e-05	4.82827	-3.36991	9	74685619	74687201							1
ENSG00000088543	C3orf18	chromosome 3 open reading frame 18	2.16838	22.4981	-1.99177	2.1766e-07	6.66222	-3.37512	3	50565384	50565700							1
ENSG00000053747	LAMA3	laminin subunit alpha 3	4.41073	46.1004	-2.40271	2.88931e-12	11.5392	-3.38569	18	23954649	23954799							1
ENSG00000172379	ARNT2	aryl hydrocarbon receptor nuclear translocator 2	5.64533	59.2305	-2.50069	1.25339e-14	13.9019	-3.39121	15	80581239	80581305							1
ENSG00000104332	SFRP1	secreted frizzled related protein 1	1.19715	12.6124	-1.55476	0.000169509	3.77081	-3.39717	8	41261964	41265166							1
ENSG00000173727	AP000769.1	NA	1.19715	12.6278	-1.5149	0.000225251	3.64733	-3.39893	11	65466085	65466720		1					0
ENSG00000236924	AL162411.1	NA	1.19715	12.7963	-1.54648	0.000181709	3.74062	-3.41805	9	6670425	6670635		1					0
ENSG00000161940	BCL6B	B cell CLL/lymphoma 6B	4.07553	44.0286	-2.32469	1.40533e-11	10.8522	-3.43338	17	7029816	7030038							1
ENSG00000118263	KLF7	Kruppel like factor 7	3.32808	35.9735	-2.22386	3.18119e-10	9.49741	-3.43418	2	207124353	207124404							1
ENSG00000246705	H2AFJ	H2A histone family member J	5.0093	54.9823	-2.47519	2.65691e-14	13.5756	-3.45629	12	14775291	14778002							1
ENSG00000230564	CALM1P2	calmodulin 1 pseudogene 2	6.5042	72.4032	-2.71308	1.39768e-17	16.8546	-3.47661	7	55259809	55260256	1						0
ENSG00000210077 #or# ENSG00000210082 /// ENSG00000210077 #or# ENSG00000211459 /// ENSG00000210077	MT-TV	mitochondrially encoded tRNA valine #or# mitochondrially encoded 16S RNA /// mitochondrially encoded tRNA valine /// mitochondrially encoded tRNA valine #or# mitochondrially encoded 12S RNA	15.7754	176.272	-2.79744	1.37736e-16	15.861	-3.48206	0	1602	1670						1	0
ENSG00000105928	GSDME	gasdermin E	1.79572	20.89	-1.80475	1.97775e-06	5.70383	-3.54018	7	24744011	24744754							1
ENSG00000114646	CSPG5	chondroitin sulfate proteoglycan 5	7.0684	82.2451	-2.70868	7.36178e-19	18.133	-3.54048	3	47577687	47577928							1
ENSG00000117266	CDK18	cyclin dependent kinase 18	13.1238	152.822	-3.00992	3.17865e-31	30.4978	-3.54159	1	205531344	205531666							1
ENSG00000267374	AC016205.1	NA	3.06471	36.556	-2.34745	6.52887e-11	10.1852	-3.57629	18	39207627	39208789		1					0
ENSG00000075643	MOCOS	molybdenum cofactor sulfurase	6.43024	77.8026	-2.72759	6.74905e-19	18.1708	-3.59687	18	36266749	36266814							1
ENSG00000008394	MGST1	microsomal glutathione S-transferase 1	30.1338	366.584	-3.31354	5.4213e-63	62.2659	-3.60469	12	16437388	16438761							1
ENSG00000256043	CTSO	cathepsin O	1.34602	16.4431	-1.75584	1.04843e-05	4.97946	-3.61071	4	155924118	155926035							1
ENSG00000095370	SH2D3C	SH2 domain containing 3C	2.13093	26.2655	-2.22506	6.45992e-09	8.18977	-3.62362	9	127754842	127755030							1
ENSG00000175868	CALCB	calcitonin related polypeptide beta	49.612	619.956	-3.4322	4.07058e-95	94.3903	-3.6434	11	15080766	15082342							1
ENSG00000056487	PHF21B	PHD finger protein 21B	2.54317	32.1486	-2.21197	1.45075e-09	8.83841	-3.66005	22	45008153	45008610							1
ENSG00000237886	NALT1	NOTCH1 associated lncRNA in T cell acute lymphoblastic leukemia 1	0.784903	10.1061	-1.64192	0.000132742	3.87699	-3.68657	9	136549546	136549893							1
ENSG00000104325	DECR1	2,4-dienoyl-CoA reductase 1	11.6633	151.593	-3.13057	4.29124e-32	31.3674	-3.70015	8	90051838	90052092							1
ENSG00000120594	PLXDC2	plexin domain containing 2	2.24235	29.996	-2.15243	3.08626e-09	8.51057	-3.74169	10	20279703	20280357							1
ENSG00000077264	PAK3	p21 (RAC1) activated kinase 3	0.784903	10.5095	-1.56242	0.000232314	3.63392	-3.74303	0	111152410	111152762							1
ENSG00000225400	RAB28P5	RAB28, member RAS oncogene family pseudogene 5	1.34602	18.0344	-2.11288	3.97945e-07	6.40018	-3.74398	0	136847384	136848034	1						0
ENSG00000170689	HOXB9	homeobox B9	62.3642	845.649	-3.60803	2.01599e-124	123.696	-3.76127	17	48621159	48622899							1
ENSG00000102038	SMARCA1	SWI/SNF related, matrix associated, actin dependent regulator of chromatin, subfamily a, member 1	18.1675	248.11	-3.36278	6.4905e-46	45.1877	-3.77155	0	129508055	129508096							1
ENSG00000188573	FBLL1	fibrillarin like 1	3.32808	45.5126	-2.40763	5.05232e-12	11.2965	-3.7735	5	168530510	168530634							1
ENSG00000136732	GYPC	glycophorin C (Gerbich blood group)	15.8533	216.867	-3.29925	5.9297e-42	41.227	-3.77395	2	126696143	126696667							1
ENSG00000150281	CTF1	cardiotrophin 1	2.09347	28.7854	-2.21902	3.06644e-09	8.51337	-3.78137	16	30902540	30903547							1
ENSG00000150893	FREM2	FRAS1 related extracellular matrix protein 2	1.98205	27.4127	-2.08199	2.13525e-08	7.67055	-3.78978	13	38850038	38850235							1
ENSG00000204052	LRRC73	leucine rich repeat containing 73	0.784903	10.896	-1.57834	0.000239262	3.62113	-3.79514	6	43506969	43507237							1
ENSG00000180921	FAM83H	family with sequence similarity 83 member H	3.55186	49.4512	-2.56306	7.74633e-14	13.1109	-3.79936	8	143723934	143724354							1
ENSG00000221164	SNORA11F	small nucleolar RNA, H/ACA box 11F	2.13093	30.547	-2.10953	8.55038e-09	8.06801	-3.84148	10	73126080	73126207					1		0
ENSG00000162496	DHRS3	dehydrogenase/reductase 3	5.23522	75.0561	-2.78444	9.17232e-19	18.0375	-3.84165	1	12579768	12580666							1
ENSG00000167642 #or# ENSG00000267748 /// ENSG00000167642	SPINT2	serine peptidase inhibitor, Kunitz type 2 #or# NA /// serine peptidase inhibitor, Kunitz type 2	13.1978	189.459	-3.26691	3.22919e-38	37.4909	-3.84351	19	38292007	38292070							1
ENSG00000087258	GNAO1	G protein subunit alpha o1	1.34602	19.7636	-1.9546	1.30881e-06	5.88312	-3.87607	16	56343763	56348132							1
ENSG00000162687	KCNT2	potassium sodium-activated channel subfamily T member 2	1.53235	22.6736	-2.06289	1.3632e-07	6.86544	-3.88719	1	196340489	196340570							1
ENSG00000105088	OLFM2	olfactomedin 2	0.784903	11.7591	-1.61305	0.000107053	3.9704	-3.90511	19	9857208	9857482							1
ENSG00000263528	IKBKE	inhibitor of nuclear factor kappa B kinase subunit epsilon	0.784903	11.8406	-1.48498	0.000319099	3.49608	-3.91508	1	206473196	206473227							1
ENSG00000130294	KIF1A	kinesin family member 1A	17.6825	284.05	-3.5416	2.36793e-52	51.6256	-4.00575	2	240797753	240797812							1
ENSG00000182533	CAV3	caveolin 3	2.69205	43.6297	-2.53657	6.75758e-13	12.1702	-4.01853	3	8745970	8746756							1
ENSG00000077943	ITGA8	integrin subunit alpha 8	1.34602	22.4423	-2.04914	1.07615e-07	6.96813	-4.05944	10	15611510	15611537							1
ENSG00000260244	AC104083.1	NA	0.598574	10.099	-1.58725	0.00022699	3.64399	-4.07654	4	155734448	155737062		1					0
ENSG00000262165	AC233723.1	NA	0.598574	10.7861	-1.58059	0.000168944	3.77226	-4.1715	17	4801159	4801455		1					0
ENSG00000267023	LRRC37A16P	leucine rich repeat containing 37 member A16, pseudogene	6.54166	121.849	-3.35613	3.29726e-28	27.4818	-4.2193	17	68130250	68130322	1						0
ENSG00000120915	EPHX2	epoxide hydrolase 2	5.15818	98.4621	-3.17449	2.3778e-24	23.6238	-4.25463	8	27522423	27522487							1
ENSG00000204710	SPDYC	speedy/RINGO cell cycle regulator family member C	2.2798	43.8207	-2.55781	7.36453e-13	12.1329	-4.26463	11	65173218	65173244							1
ENSG00000029534	ANK1	ankyrin 1	0.598574	11.533	-1.57992	0.00013964	3.85499	-4.26809	8	41788882	41789297							1
ENSG00000272710	AC133041.1	NA	0.598574	11.6451	-1.56852	0.000161713	3.79125	-4.28205	3	75579978	75580199		1					0
ENSG00000147027	TMEM47	transmembrane protein 47	5.31013	104.943	-3.18346	1.97282e-25	24.7049	-4.30472	0	34627064	34630312							1
ENSG00000065357	DGKA	diacylglycerol kinase alpha	1.19715	23.8111	-2.08214	4.28414e-08	7.36814	-4.31396	12	55953685	55954010							1
ENSG00000099256 #or# ENSG00000240294 /// ENSG00000099256	PRTFDC1	phosphoribosyl transferase domain containing 1 /// phosphoribosyl transferase domain containing 1 #or# RNA, 7SK small nuclear pseudogene 241	7.81585	156.126	-3.40486	4.86939e-34	33.3125	-4.32017	10	24908301	24908502							1
ENSG00000164128	NPY1R	neuropeptide Y receptor Y1	0.784903	15.7037	-1.84315	5.36516e-06	5.27042	-4.32245	4	163326555	163326705							1
ENSG00000268606	MAGEA2	MAGE family member A2	2.13093	42.6448	-2.544	6.31147e-13	12.1999	-4.32282	0	152751364	152751428							1
ENSG00000110013	SIAE	sialic acid acetylesterase	4.2244	86.0656	-3.10742	1.8784e-22	21.7262	-4.34862	11	124669436	124669521							1
ENSG00000184368	MAP7D2	MAP7 domain containing 2	4.52522	95.0734	-3.12405	1.37476e-23	22.8618	-4.39298	0	20021348	20021549							1
ENSG00000182912	TSPEAR-AS2	TSPEAR antisense RNA 2	2.76696	59.5511	-2.83982	3.63057e-17	16.44	-4.42776	21	44525824	44525952							1
ENSG00000188732	FAM221A	family with sequence similarity 221 member A	1.38348	30.3147	-2.33528	3.65507e-10	9.4371	-4.45365	7	23702694	23703249							1
ENSG00000027869	SH2D2A	SH2 domain containing 2A	2.7295	59.9097	-2.83253	4.11401e-17	16.3857	-4.45608	1	156814498	156815221							1
ENSG00000188338	SLC38A3	solute carrier family 38 member 3	1.4949	33.0732	-2.41464	8.20068e-11	10.0862	-4.46754	3	50218270	50218680							1
ENSG00000111432	FZD10	frizzled class receptor 10	0.74745	16.5698	-2.02231	9.36982e-07	6.02827	-4.47044	12	130164689	130165739							1
ENSG00000189367 #or# ENSG00000255330	KIAA0408	KIAA0408 #or# NA	2.13093	48.0441	-2.747	1.63906e-14	13.7854	-4.49481	6	127450046	127450352							1
ENSG00000240771	ARHGEF25	Rho guanine nucleotide exchange factor 25	3.47695	78.6356	-3.28441	7.89884e-22	21.1024	-4.49929	12	57619311	57619379							1
ENSG00000165084	C8orf34	chromosome 8 open reading frame 34	0.784903	18.0309	-1.97799	5.72903e-07	6.24192	-4.52181	8	68791015	68792571							1
ENSG00000166206	GABRB3	gamma-aminobutyric acid type A receptor beta3 subunit	2.58063	60.8751	-2.87384	4.62573e-17	16.3348	-4.56006	15	26798387	26798446							1
ENSG00000232751	AL645568.3	NA	6.13154	144.747	-3.50079	4.37661e-33	32.3589	-4.56114	1	173351689	173352004		1					0
ENSG00000144488	ESPNL	espin like	1.53235	37.3047	-2.49769	5.78669e-12	11.2376	-4.60554	2	238130128	238133281							1
ENSG00000268916	CSAG3	CSAG family member 3	1.53235	37.9881	-2.54511	2.26855e-12	11.6443	-4.63173	0	152759913	152760219							1
ENSG00000183145	RIPPLY3	ripply transcriptional repressor 3	0.598574	15.6518	-1.85354	4.4121e-06	5.35535	-4.70866	21	37018208	37019659							1
ENSG00000147872	PLIN2	perilipin 2	4.82297	128.476	-3.46344	8.8344e-31	30.0538	-4.73544	9	19129737	19131271							1
ENSG00000177335	C8orf31	chromosome 8 open reading frame 31 (putative)	0.74745	20.1338	-2.08914	1.43127e-07	6.84428	-4.7515	8	143047679	143047984							1
ENSG00000204934	ATP6V0E2-AS1	ATP6V0E2 antisense RNA 1	2.91583	78.9791	-3.18684	1.29678e-21	20.8871	-4.75949	7	149870298	149870351							1
ENSG00000162733	DDR2	discoidin domain receptor tyrosine kinase 2	6.9539	191.925	-3.76725	6.55508e-40	39.1834	-4.78658	1	162772257	162772435							1
ENSG00000126016	AMOT	angiomotin	21.2344	638.32	-4.43771	4.39186e-97	96.3574	-4.90981	0	112823137	112823188							1
ENSG00000157514	TSC22D3	TSC22 domain family member 3	22.5835	681.092	-4.42548	3.27054e-96	95.4854	-4.91451	0	107775420	107775525							1
ENSG00000177352	CCDC71	coiled-coil domain containing 71	3.5144	107.43	-3.5226	2.02112e-27	26.6944	-4.93397	3	49162535	49162804							1
ENSG00000128165	ADM2	adrenomedullin 2	0.74745	22.9556	-2.15145	2.24729e-08	7.64834	-4.94073	22	50482904	50482940							1
ENSG00000167641	PPP1R14A	protein phosphatase 1 regulatory inhibitor subunit 14A	4.2244	135.554	-3.59683	3.81351e-32	31.4187	-5.00397	19	38251865	38252254							1
ENSG00000136010	ALDH1L2	aldehyde dehydrogenase 1 family member L2	6.69053	223.587	-3.99996	2.78808e-43	42.5547	-5.06257	12	105070520	105070804							1
ENSG00000203877	RIPPLY2	ripply transcriptional repressor 2	0.784903	26.9135	-2.30523	1.43137e-09	8.84425	-5.09967	6	83857390	83857515							1
ENSG00000157064	NMNAT2	nicotinamide nucleotide adenylyltransferase 2	0.784903	27.5731	-2.39413	3.24036e-10	9.48941	-5.1346	1	183282866	183284039							1
ENSG00000130643	CALY	calcyon neuron specific vesicular protein	0.74745	27.8684	-2.42079	2.90193e-10	9.53731	-5.22051	10	133327427	133327673							1
ENSG00000185055	EFCAB10	EF-hand calcium binding domain 10	0.598574	22.4383	-2.1277	3.24927e-08	7.48821	-5.22829	7	105567195	105567453							1
ENSG00000105696	TMEM59L	transmembrane protein 59 like	2.09347	81.1321	-3.3056	7.62029e-23	22.118	-5.2763	19	18618375	18618454							1
ENSG00000274750	HIST1H3E	histone cluster 1 H3 family member e	0.598574	23.464	-2.25369	7.28258e-09	8.13771	-5.29278	6	26225566	26225616							1
ENSG00000259803	SLC22A31	solute carrier family 22 member 31	2.13093	86.1792	-3.50767	4.61228e-24	23.3361	-5.33779	16	89199412	89199655							1
ENSG00000149599	DUSP15	dual specificity phosphatase 15	0.598574	24.7916	-2.30522	2.76052e-09	8.55901	-5.37218	20	31870338	31870572							1
ENSG00000197496	SLC2A10	solute carrier family 2 member 10	0.598574	25.55	-2.27761	3.79199e-09	8.42113	-5.41565	20	46725041	46725470							1
ENSG00000172460	PRSS30P	serine protease 30, pseudogene	0.784903	36.9966	-2.7221	2.76383e-13	12.5585	-5.55873	16	2839656	2839931	1						0
ENSG00000184351	KRTAP19-1	keratin associated protein 19-1	0.598574	31.2895	-2.47526	5.37126e-11	10.2699	-5.70801	21	30479699	30480044							1
ENSG00000268902	CSAG2	CSAG family member 2	0.74745	40.6408	-2.74276	4.67318e-14	13.3304	-5.76481	0	152708571	152708573							1
ENSG00000021645	NRXN3	neurexin 3	0.598574	41.818	-2.79801	2.38607e-14	13.6223	-6.12645	14	79861663	79861959							1
ENSG00000261409	AL035425.3	NA	21.2749	1519.13	-5.56978	9.67833e-163	162.014	-6.15795	0	108719949	108724944		1					0
ENSG00000145945	FAM50B	family with sequence similarity 50 member B	0.74745	62.6433	-3.18609	9.27506e-20	19.0327	-6.38904	6	3850790	3851317							1
ENSG00000156925	ZIC3	Zic family member 3	0.74745	79.0917	-3.48012	8.95383e-24	23.048	-6.72541	0	137569891	137569995							1
ENSG00000165349	SLC7A3	solute carrier family 7 member 3	0.784903	89.0546	-3.61359	1.36069e-25	24.8662	-6.82603	0	70925588	70925812							1
ENSG00000196711	ALKAL1	ALK and LTK ligand 1	0.74745	104.264	-3.752	5.7026e-28	27.2439	-7.12405	8	52534542	52534589							1
