# Supplementary material for: The role of reciprocal fusions in MLL-r acute leukemia: studying the chromosomal translocation t(6;11)
Source: Oncogene. 2021 Aug 5;40(40):5902–12. doi: 10.1038/s41388-021-01983-3 (PMC8497272; doi:10.1038/s41388-021-01983-3)
Supplement: Supplementary file 5 — MACE-Seq exMLL-AF6 [file 41388_2021_1983_MOESM5_ESM.xlsx]

## Sheet: Sheet1
ID	gene symbol	gene name	mean exp	mean mock	log2	pvalue	minus log 10	var-log2	chrom	begin	end	PG	NA	LINC	MIR	SNO	MT	PCG
ENSG00000122862	SRGN	serglycin	445.417	1.02964	6.2236	2.13061e-121	120.671	8.75687	10	69104121	69104811							1
ENSG00000090382	LYZ	lysozyme	205.605	0.689313	5.31435	3.13378e-76	75.5039	8.2205	12	69350287	69350506							1
ENSG00000162511	LAPTM5	lysosomal protein transmembrane 5	85.0688	0.400708	4.42433	5.05889e-49	48.2959	7.72993	1	30741689	30742549							1
ENSG00000187653	TMSB4XP8	TMSB4X pseudogene 8	68.6296	0.344966	4.21367	2.20959e-43	42.6557	7.63623	4	90838903	90839037	1						0
ENSG00000136286	MYO1G	myosin IG	33.0286	0.172483	3.25069	1.24126e-21	20.9061	7.58112	7	44968523	44969483							1
ENSG00000197061	HIST1H4C	histone cluster 1 H4 family member c	5157.48	30.5435	6.82642	4.45986e-299	298.351	7.39966	6	26104260	26104310							1
ENSG00000237632	S100A11P1	S100 calcium binding protein A11 pseudogene 1	23.7477	0.172483	2.94492	2.09638e-17	16.6785	7.10519	7	103262000	103262311	1						0
ENSG00000019582	CD74	CD74 molecule	144.838	1.14638	4.75842	5.91889e-62	61.2278	6.98121	5	150406705	150406960							1
ENSG00000196415	PRTN3	proteinase 3	79.0425	0.628933	4.17774	2.04818e-42	41.6886	6.97358	19	847970	848175							1
ENSG00000240776	AC079944.1	NA	66.3487	0.573191	4.05209	1.69942e-40	39.7697	6.85491	3	113850237	113850731		1					0
ENSG00000115956	PLEK	pleckstrin	19.1513	0.172483	2.70083	1.49729e-14	13.8247	6.79485	2	68395680	68395717							1
ENSG00000261371	PECAM1	platelet and endothelial cell adhesion molecule 1	31.6302	0.288605	3.32182	2.77797e-23	22.5563	6.77606	17	64377574	64378117							1
ENSG00000132965	ALOX5AP	arachidonate 5-lipoxygenase activating protein	21.8234	0.228225	2.81241	6.43247e-16	15.1916	6.57927	13	30744060	30744396							1
ENSG00000005844	ITGAL	integrin subunit alpha L	37.4222	0.400708	3.38206	2.20498e-24	23.6566	6.5452	16	30521492	30522243							1
ENSG00000220614	AL583834.1	NA	76.1598	0.917538	4.19004	2.09367e-45	44.6791	6.37512	6	43328134	43328476		1					0
ENSG00000156970 #or# ENSG00000259288	BUB1B-PAK6	BUB1 mitotic checkpoint serine/threonine kinase B #or# BUB1B-PAK6 readthrough	13.2663	0.172483	2.17898	2.41288e-09	8.61746	6.26517	15	40264781	40264890							1
ENSG00000204287	HLA-DRA	major histocompatibility complex, class II, DR alpha	121.697	1.71957	3.50376	2.78468e-24	23.5552	6.1451	6	32444652	32445046							1
ENSG00000136167	LCP1	lymphocyte cytosolic protein 1	128.916	1.95182	4.46564	4.83018e-59	58.316	6.04547	13	46159016	46159686							1
ENSG00000214318	ATP5MC1P6	ATP synthase membrane subunit c locus 1 pseudogene 6	33.0752	0.51683	3.25355	9.33004e-23	22.0301	5.99992	18	63496989	63497400	1						0
ENSG00000130592	LSP1	lymphocyte-specific protein 1	35.42	0.57721	3.21547	1.65922e-21	20.7801	5.93933	11	1887237	1887345							1
ENSG00000160255	ITGB2	integrin subunit beta 2	59.8228	0.977918	3.78672	2.41866e-34	33.6164	5.93484	21	44910321	44910785							1
ENSG00000179611	DGKZP1	diacylglycerol kinase zeta pseudogene 1	13.6181	0.228225	2.23052	8.15448e-10	9.0886	5.89892	13	43968424	43971199	1						0
ENSG00000197253	TPSB2	tryptase beta 2 (gene/pseudogene)	31.8821	0.573191	3.17077	1.7931e-21	20.7464	5.79759	16	1228337	1228649	1						0
ENSG00000134802	SLC43A3	solute carrier family 43 member 3	21.5667	0.400708	2.68234	2.40765e-14	13.6184	5.75011	11	57426173	57426352							1
ENSG00000073737	DHRS9	dehydrogenase/reductase 9	20.3516	0.400708	2.65407	1.37746e-14	13.8609	5.66645	2	169095768	169096167							1
ENSG00000283016	AL139353.3	NA	75.1526	1.49073	3.85207	2.02311e-41	40.694	5.65573	14	31320224	31320634		1					0
ENSG00000081237	PTPRC	protein tyrosine phosphatase, receptor type C	13.6208	0.288605	2.22796	1.06267e-09	8.9736	5.56057	1	198754269	198754457							1
ENSG00000219391	AC019129.1	NA	10.0022	0.228225	1.86798	3.24261e-07	6.48911	5.45372	2	44065894	44066154		1					0
ENSG00000197471	SPN	sialophorin	12.3469	0.288605	2.18471	1.45547e-09	8.837	5.41891	16	29668442	29670518							1
ENSG00000226138	AC004801.1	NA	36.5498	0.861796	3.09973	4.9878e-20	19.3021	5.40637	12	48085062	48085421		1					0
ENSG00000202538	RNU4-2	RNA, U4 small nuclear 2	12.078	0.288605	2.12521	6.88498e-09	8.1621	5.38715	12	120291763	120291903							1
ENSG00000197989 #or# ENSG00000278274	SNORA61	small nucleolar RNA host gene 12 #or# small nucleolar RNA, H/ACA box 61	16.3468	0.400708	2.31516	7.008e-11	10.1544	5.35032	1	28579764	28579893					1		0
ENSG00000104903	LYL1	LYL1, basic helix-loop-helix family member	11.413	0.288605	2.01846	3.59686e-08	7.44408	5.30543	19	13101178	13102724							1
ENSG00000123338	NCKAP1L	NCK associated protein 1 like	26.2389	0.689313	2.83757	4.00636e-17	16.3973	5.2504	12	54536129	54536552							1
ENSG00000101361 #or# ENSG00000212498	SNORD86	NOP56 ribonucleoprotein #or# small nucleolar RNA, C/D box 86	30.6155	0.806054	3.04611	5.56225e-20	19.2547	5.24724	20	2656097	2656182					1		0
ENSG00000217824	SNRPEP6	small nuclear ribonucleoprotein polypeptide E pseudogene 6	29.222	0.805435	3.06313	1.52476e-19	18.8168	5.18114	6	148567378	148567654	1						0
ENSG00000084110	HAL	histidine ammonia-lyase	14.5375	0.400708	2.25756	3.22944e-10	9.49087	5.18109	12	95994977	95995200							1
ENSG00000111321	LTBR	lymphotoxin beta receptor	14.3396	0.400708	2.25565	5.14556e-10	9.28857	5.16131	12	6390660	6391571							1
ENSG00000258802	AL139317.2	NA	292.234	8.43033	4.63023	6.95665e-117	116.158	5.11539	14	52798904	52799061		1					0
ENSG00000180353	HCLS1	hematopoietic cell-specific Lyn substrate 1	31.9652	0.922176	3.00807	1.51029e-19	18.8209	5.11532	3	121657982	121658347							1
ENSG00000143851	PTPN7	protein tyrosine phosphatase, non-receptor type 7	25.684	0.749693	2.82074	4.06212e-16	15.3912	5.09843	1	202158458	202159454							1
ENSG00000210191 /// ENSG00000210184 #or# ENSG00000210191 /// ENSG00000198786 #or# ENSG00000210191 /// ENSG00000210176 #or# ENSG00000210184 #or# ENSG00000210191	MT-TL2	mitochondrially encoded tRNA histidine #or# mitochondrially encoded tRNA serine 2 (AGU/C) #or# mitochondrially encoded tRNA leucine 2 (CUN) /// mitochondrially encoded NADH:ubiquinone oxidoreductase core subunit 5 #or# mitochondrially encoded tRNA leucine 2 (CUN) /// mitochondrially encoded tRNA serine 2 (AGU/C) #or# mitochondrially encoded tRNA leucine 2 (CUN) /// mitochondrially encoded tRNA le…	54.5198	1.60685	3.51489	8.44894e-30	29.0732	5.08447	0	12266	12336						1	0
ENSG00000166428	PLD4	phospholipase D family member 4	19.6939	0.633571	2.50547	1.33864e-12	11.8733	4.9581	14	104932965	104933235							1
ENSG00000093072	ADA2	adenosine deaminase 2	12.396	0.400708	2.03317	2.14961e-08	7.66764	4.95118	22	17209678	17209723							1
ENSG00000223638	RFPL4A	ret finger protein like 4A	15.0144	0.517449	2.15391	4.36039e-09	8.36047	4.85878	19	55761792	55761800							1
ENSG00000106006 /// ENSG00000106006 #or# ENSG00000272801	HOXA6	homeobox A6 /// homeobox A6 #or# NA	52.0352	1.89206	3.2948	1.93598e-28	27.7131	4.78146	7	27145662	27145917							1
ENSG00000128340	RAC2	Rac family small GTPase 2	64.17	2.52563	3.38328	1.70721e-31	30.7677	4.66719	22	37240805	37241012							1
ENSG00000227766	AL671277.1	NA	11.6745	0.461088	1.99935	5.09771e-08	7.29262	4.66217	6	29942075	29943067		1					0
ENSG00000147206	NXF3	nuclear RNA export factor 3	14.1608	0.57721	2.156	2.82328e-09	8.54925	4.61667	0	103082096	103082364							1
ENSG00000252947	SCARNA1	small Cajal body-specific RNA 1	15.3174	0.633571	0.415472	0.0445382	1.35127	4.59553	1	27834401	27834566							1
ENSG00000169442	CD52	CD52 molecule	13.8162	0.573191	2.08922	8.34367e-09	8.07864	4.5912	1	26320171	26320324							1
ENSG00000169896	ITGAM	integrin subunit alpha M	10.9338	0.461088	1.93843	1.09441e-07	6.96082	4.56761	16	31331375	31331536							1
ENSG00000110876	SELPLG	selectin P ligand	16.2979	0.689313	2.31704	8.42515e-11	10.0744	4.56338	12	108622829	108623068							1
ENSG00000243678	NME2	NME/NM23 nucleoside diphosphate kinase 2	63.9348	2.75323	3.41369	1.29891e-34	33.8864	4.5374	17	51171487	51171608							1
ENSG00000249176	AC027801.2	NA	11.9482	0.51683	1.91171	1.74135e-07	6.75911	4.53096	17	49939122	49939819		1					0
ENSG00000172969	FRG2C	FSHD region gene 2 family member C	29.1509	1.2625	2.85334	1.07129e-16	15.9701	4.52918	3	75666042	75667220							1
ENSG00000129951	PLPPR3	phospholipid phosphatase related 3	13.1513	0.573191	1.92967	6.0201e-08	7.2204	4.52005	19	821560	821955							1
ENSG00000261461	UBE2MP1	ubiquitin conjugating enzyme E2 M pseudogene 1	32.8135	1.43901	2.90023	6.27757e-19	18.2022	4.51114	16	35169692	35170241	1						0
ENSG00000210100	MT-TI	mitochondrially encoded tRNA isoleucine	55.644	2.47328	1.91298	2.09885e-07	6.67802	4.49172	0	4263	4331						1	0
ENSG00000258956	COX4I1P1	cytochrome c oxidase subunit 4I1 pseudogene 1	42.4904	1.89144	3.04934	3.67296e-24	23.435	4.48958	14	61831861	61832369	1						0
ENSG00000166825	ANPEP	alanyl aminopeptidase, membrane	12.9532	0.57721	2.10507	6.65864e-09	8.17661	4.48807	15	89806584	89806945							1
ENSG00000077420	APBB1IP	amyloid beta precursor protein binding family B member 1 interacting protein	10.2075	0.456451	1.76443	1.59239e-06	5.79795	4.48303	10	26566961	26567226							1
ENSG00000240972	MIF	macrophage migration inhibitory factor	2045.31	91.8209	4.37959	0	?	4.47735	22	23895040	23895227							1
ENSG00000038358	EDC4	enhancer of mRNA decapping 4	17.706	0.805435	2.30296	2.19787e-10	9.658	4.45832	16	67883956	67884123							1
ENSG00000204264	PSMB8	proteasome subunit beta 8	21.4055	0.973899	2.44425	3.91014e-12	11.4078	4.45807	6	32841021	32841047							1
ENSG00000233780	HNRNPA1P30	heterogeneous nuclear ribonucleoprotein A1 pseudogene 30	10.7332	0.517449	0.912518	0.00423475	2.37317	4.37452	13	20948294	20948965	1						0
ENSG00000233503	HNRNPLP1	heterogeneous nuclear ribonucleoprotein L pseudogene 1	21.2855	1.02964	2.48532	7.67129e-13	12.1151	4.36966	6	7481094	7482594	1						0
ENSG00000229020	AKR7A2P1	aldo-keto reductase family 7 member A2 pseudogene 1	10.5353	0.517449	1.76133	1.63987e-06	5.78519	4.34767	1	112923423	112924337	1						0
ENSG00000258613	RPL21P7	ribosomal protein L21 pseudogene 7	91.4063	4.52855	3.47658	1.7569e-45	44.7553	4.33517	14	65266638	65267008	1						0
ENSG00000269576 #or# ENSG00000275862	HNRNPMP2	heterogeneous nuclear ribonucleoprotein M pseudogene 2 #or# NA	17.3492	0.861796	2.3048	4.2469e-11	10.3719	4.33138	19	46809585	46810183	1						0
ENSG00000134516	DOCK2	dedicator of cytokinesis 2	27.2928	1.37399	2.76094	1.47984e-16	15.8298	4.31208	5	170082796	170083377							1
ENSG00000243538	RPS26P28	ribosomal protein S26 pseudogene 28	303.365	15.6564	3.96236	1.88179e-114	113.725	4.27623	5	16902294	16902641	1						0
ENSG00000213492	NT5C3AP1	5'-nucleotidase, cytosolic IIIA pseudogene 1	10.0096	0.51683	1.81011	5.43424e-07	6.26486	4.27555	4	117575098	117576109	1						0
ENSG00000215088	RPS5P3	ribosomal protein S5 pseudogene 3	18.337	0.977918	2.35858	2.09133e-11	10.6796	4.2289	21	33481580	33482195	1						0
ENSG00000182676	PPP1R27	protein phosphatase 1 regulatory subunit 27	25.7257	1.37863	2.60967	5.51597e-15	14.2584	4.22191	17	81833498	81834498							1
ENSG00000176340 #or# ENSG00000256100	AP000721.1	cytochrome c oxidase subunit 8A #or# NA	689.859	37.2323	4.00932	7.29528e-216	215.137	4.21168	11	63988344	63988346		1					0
ENSG00000235787	AC092047.1	NA	64.0233	3.55867	3.28876	2.63849e-33	32.5786	4.16919	3	42469640	42469879		1					0
ENSG00000234213	FHP1	fumarate hydratase pseudogene 1	20.535	1.14638	2.31397	1.11918e-11	10.9511	4.16293	13	42255873	42256575	1						0
ENSG00000231991	ANXA2P2	annexin A2 pseudogene 2	58.1627	3.2713	3.10679	8.82512e-29	28.0543	4.15216	9	33624274	33625293	1						0
ENSG00000237972	TUBG1P	tubulin gamma 1 pseudogene	28.3636	1.60747	2.64177	7.76753e-16	15.1097	4.14118	7	43918697	43920054	1						0
ENSG00000197956	S100A6	S100 calcium binding protein A6	13.0804	0.745056	2.08168	6.24838e-09	8.20423	4.13391	1	153535093	153535360							1
ENSG00000105583 #or# ENSG00000269590	AC010422.5	WD repeat domain 83 opposite strand #or# NA	21.9338	1.2625	2.4002	2.99796e-12	11.5232	4.11879	19	12664828	12664985		1					0
ENSG00000242041	RPL35AP28	ribosomal protein L35a pseudogene 28	640.403	37.3834	3.51481	1.39738e-46	45.8547	4.09851	12	49863173	49863503	1						0
ENSG00000167895	TMC8	transmembrane channel like 8	16.6673	0.977918	2.22775	6.61707e-10	9.17933	4.09116	17	78140837	78141229							1
ENSG00000240912	AC092896.1	NA	13.6133	0.801416	1.96584	4.72121e-08	7.32595	4.08632	3	114103249	114103628		1					0
ENSG00000172349	IL16	interleukin 16	12.5916	0.745056	1.93846	1.2763e-07	6.89405	4.07897	15	81306423	81306526							1
ENSG00000196589	MBD3L2B	methyl-CpG binding domain protein 3 like 2B	16.3542	0.978536	2.13984	5.32341e-09	8.27381	4.06289	19	7018971	7019076							1
ENSG00000198520	ARMH1	armadillo-like helical domain containing 1	21.9531	1.32288	2.45091	4.95562e-13	12.3049	4.05267	1	44725291	44725591							1
ENSG00000210107	MT-TQ	mitochondrially encoded tRNA glutamine	25.4857	1.54709	2.44067	7.11711e-13	12.1477	4.04206	0	4329	4400						1	0
ENSG00000145287	PLAC8	placenta specific 8	71.9349	4.36936	3.22716	1.11499e-33	32.9527	4.0412	4	83092861	83094686							1
ENSG00000267076	CCDC58P3	coiled-coil domain containing 58 pseudogene 3	15.8629	0.973899	2.09347	5.01474e-09	8.29975	4.02574	18	12211378	12211807	1						0
ENSG00000104894	CD37	CD37 molecule	21.5449	1.32288	2.42011	1.57436e-12	11.8029	4.02559	19	49343283	49343335							1
ENSG00000237064	EIF3IP1	eukaryotic translation initiation factor 3 subunit I pseudogene 1	30.6325	1.8868	2.67274	3.73946e-17	16.4272	4.02105	7	109959218	109960184	1						0
ENSG00000010610	CD4	CD4 molecule	19.5545	1.20676	2.30349	1.42673e-11	10.8457	4.01829	12	6814759	6814842							1
ENSG00000206892	RNU6-42P	RNA, U6 small nuclear 42, pseudogene	12.1391	0.749693	1.98025	6.19843e-08	7.20772	4.01722	3	196784980	196785086	1						0
ENSG00000228002	DHX9P1	DEAH-box helicase 9 pseudogene 1	10.1416	0.628933	1.75617	1.47531e-06	5.83112	4.01123	13	76984868	76987943	1						0
ENSG00000230897	RPS18P12	ribosomal protein S18 pseudogene 12	1907.12	124.571	3.77029	6.01742e-168	167.221	3.93636	17	14705076	14705534	1						0
ENSG00000248966	BCLAF1P1	BCL2 associated transcription factor 1 pseudogene 1	15.6744	1.03428	2.10662	2.81457e-09	8.55059	3.92171	5	110948029	110950780	1						0
ENSG00000123329	ARHGAP9	Rho GTPase activating protein 9	10.4008	0.689313	1.74238	2.06307e-06	5.68549	3.91539	12	57479161	57479165							1
ENSG00000210135 /// ENSG00000210135 #or# ENSG00000210140 /// ENSG00000210127 #or# ENSG00000210135	MT-TN	mitochondrially encoded tRNA asparagine #or# mitochondrially encoded tRNA cysteine /// mitochondrially encoded tRNA alanine #or# mitochondrially encoded tRNA asparagine /// mitochondrially encoded tRNA asparagine	553.505	37.2873	3.13621	2.67472e-28	27.5727	3.89184	0	5657	5729						1	0
ENSG00000253173	H2AFZP2	H2A histone family member Z pseudogene 2	53.6247	3.61905	3.03574	3.39999e-27	26.4685	3.88922	8	70103798	70104179	1						0
ENSG00000210196	MT-TP	mitochondrially encoded tRNA proline	582.892	39.406	1.88258	3.27101e-07	6.48532	3.88674	0	15956	16023						1	0
ENSG00000206341	HLA-H	major histocompatibility complex, class I, H (pseudogene)	25.42	1.7747	2.51425	2.04834e-14	13.6886	3.84032	6	29890439	29890482	1						0
ENSG00000225483	RPL22P4	ribosomal protein L22 pseudogene 4	59.6541	4.17895	2.97684	9.09211e-28	27.0413	3.83541	1	206160887	206161276	1						0
ENSG00000225899	FRG2B	FSHD region gene 2 family member B	37.4712	2.63649	2.79717	3.10345e-17	16.5082	3.82909	10	133626743	133626795							1
ENSG00000275110	MIR6087	microRNA 6087	152.584	10.7423	3.45645	9.42532e-64	63.0257	3.82823	0	109054542	109054590				1			0
ENSG00000213763	ACTBP2	actin, beta pseudogene 2	32.6276	2.3008	2.71352	8.91568e-18	17.0498	3.82588	5	77784881	77786003	1						0
ENSG00000225462	FDPSP1	farnesyl diphosphate synthase pseudogene 1	34.6083	2.46927	2.67136	1.61124e-17	16.7928	3.80896	1	187563061	187564131	1						0
ENSG00000239200	RPL22P20	ribosomal protein L22 pseudogene 20	32.6912	2.34851	2.5444	4.53324e-17	16.3436	3.79908	14	18692032	18692408	1						0
ENSG00000111679	PTPN6	protein tyrosine phosphatase, non-receptor type 6	26.217	1.89082	2.4662	1.60454e-13	12.7946	3.79342	12	6961126	6961316							1
ENSG00000227621	PHBP11	prohibitin pseudogene 11	18.2342	1.31825	2.13477	2.16339e-09	8.66486	3.78996	1	223856579	223857387	1						0
ENSG00000256211	AC023512.1	NA	16.6818	1.20676	2.11051	2.09034e-09	8.67978	3.78906	12	16989876	16989936		1					0
ENSG00000282879	AC095038.3	NA	42.2778	3.0982	2.79057	2.54436e-21	20.5944	3.7704	7	56736396	56736590		1					0
ENSG00000244527	AC022795.1	NA	89.3453	6.54878	3.21472	9.01671e-39	38.045	3.77009	18	21119182	21119661		1					0
ENSG00000066336	SPI1	Spi-1 proto-oncogene	31.3024	2.29678	2.52961	8.83555e-15	14.0538	3.76859	11	47358181	47358598							1
ENSG00000256756	TIMM17BP1	translocase of inner mitochondrial membrane 17B pseudogene 1	11.5425	0.857159	1.77363	1.10242e-06	5.95765	3.75125	12	17400399	17400914	1						0
ENSG00000234559	RPL22P7	ribosomal protein L22 pseudogene 7	48.2287	3.62369	2.83625	1.05134e-23	22.9783	3.73436	2	129939848	129940217	1						0
ENSG00000232388 #or# ENSG00000284776	AL121900.2	small integral membrane protein 26 #or# NA	117.711	8.89389	3.2004	6.24617e-46	45.2044	3.72629	20	18567453	18567478		1					0
ENSG00000174004	NRROS	negative regulator of reactive oxygen species	14.4032	1.09002	2.01988	1.86957e-08	7.72826	3.72396	3	196654527	196654993							1
ENSG00000183048 #or# ENSG00000262660	AC139530.2	solute carrier family 25 member 10 #or# NA	18.0313	1.37461	2.13309	1.4388e-09	8.842	3.71341	17	81720078	81720539		1					0
ENSG00000090376 #or# ENSG00000284011 /// ENSG00000090376	IRAK3	interleukin 1 receptor associated kinase 3 #or# microRNA 6502 /// interleukin 1 receptor associated kinase 3	17.4837	1.37863	2.20095	3.75983e-10	9.42483	3.66471	12	66248172	66248373							1
ENSG00000241255	AL136126.1	NA	567.16	45.3424	3.52537	2.93961e-176	175.532	3.64482	11	33237008	33237409		1					0
ENSG00000213478	CFL1P2	cofilin 1 pseudogene 2	10.7479	0.861796	1.75152	1.64397e-06	5.78411	3.64056	1	51157788	51158471	1						0
ENSG00000115541 #or# ENSG00000270757 /// ENSG00000115540 #or# ENSG00000270757	HSPE1-MOB4	heat shock protein family E (Hsp10) member 1 #or# HSPE1-MOB4 readthrough /// MOB family member 4, phocein #or# HSPE1-MOB4 readthrough	502.452	40.8033	3.51175	7.60563e-171	170.119	3.62223	2	197550647	197550726							1
ENSG00000213711	PHBP7	prohibitin pseudogene 7	66.2528	5.39962	2.91651	4.7616e-30	29.3222	3.61705	9	85898903	85899716	1						0
ENSG00000247982	LINC00926	long intergenic non-protein coding RNA 926	30.8331	2.53366	1.86722	2.95435e-07	6.52954	3.60518	15	57306300	57307769			1				0
ENSG00000268074	RPL22P5	ribosomal protein L22 pseudogene 5	44.4462	3.67479	2.74793	2.02604e-21	20.6934	3.59633	1	143929994	143930382	1						0
ENSG00000213452	AKR1B1P2	aldo-keto reductase family 1 member B1 pseudogene 2	30.0995	2.52099	2.41127	2.03635e-14	13.6911	3.57768	3	74135959	74136892	1						0
ENSG00000185811	IKZF1	IKAROS family zinc finger 1	16.0925	1.37399	2.06384	3.93151e-09	8.40544	3.54994	7	50369522	50369704							1
ENSG00000213539	YBX1P6	Y-box binding protein 1 pseudogene 6	43.0722	3.68345	2.69394	6.4025e-19	18.1937	3.54763	9	109532830	109532943	1						0
ENSG00000231635	ATP5F1BP1	ATP synthase F1 subunit beta pseudogene 1	15.3468	1.31825	2.01325	1.37424e-08	7.86194	3.54125	2	98206151	98207724	1						0
ENSG00000219806	ATP5PBP6	ATP synthase peripheral stalk-membrane subunit b pseudogene 6	34.4245	2.9861	2.51475	3.54467e-16	15.4504	3.5271	6	139614438	139615204	1						0
ENSG00000253480	AC122713.1	NA	11.1318	0.973281	1.68601	4.53451e-06	5.34347	3.51568	5	180085717	180086200		1					0
ENSG00000240489	SETP14	SET pseudogene 14	18.9604	1.66785	2.14957	2.29655e-10	9.63892	3.50693	3	155987304	155988176	1						0
ENSG00000254935	AP002469.1	NA	26.6937	2.35314	2.30716	5.23316e-13	12.2812	3.50384	11	122618851	122619274		1					0
ENSG00000236574	AC092634.6	NA	13.4766	1.20614	1.92001	1.14658e-07	6.9406	3.48198	7	63843314	63843505		1					0
ENSG00000223861	AL365436.1	NA	30.146	2.70089	2.54249	9.0509e-16	15.0433	3.48046	1	151557446	151557940		1					0
ENSG00000239600	AP000797.1	NA	14.0851	1.2625	1.82287	2.50131e-07	6.60183	3.47981	11	115951105	115951491		1					0
ENSG00000198695 #or# ENSG00000210194 /// ENSG00000210194	MT-TE	mitochondrially encoded NADH:ubiquinone oxidoreductase core subunit 6 #or# mitochondrially encoded tRNA glutamic acid /// mitochondrially encoded tRNA glutamic acid	803.382	72.5957	2.99778	3.42901e-33	32.4648	3.46813	0	14674	14742						1	0
ENSG00000186743	TPI1P3	triosephosphate isomerase 1 pseudogene 3	20.2928	1.83971	2.16434	2.28848e-10	9.64045	3.46342	6	116038756	116039495	1						0
ENSG00000259078	PTBP1P	polypyrimidine tract binding protein 1 pseudogene	11.4008	1.03428	1.7238	2.02587e-06	5.69339	3.46244	14	65280621	65281166	1						0
ENSG00000220548	VIM2P	vimentin 2, pseudogene	12.012	1.09002	1.76005	1.29632e-06	5.88729	3.46204	6	126602356	126603649	1						0
ENSG00000235354	RPS29P16	ribosomal protein S29 pseudogene 16	4394.84	398.973	3.31887	8.96094e-116	115.048	3.46145	7	103348601	103348771	1						0
ENSG00000270230	MTND6P22	mitochondrially encoded NADH:ubiquinone oxidoreductase core subunit 6 pseudogene 22	22.0776	2.00756	2.20886	4.86505e-11	10.3129	3.45907	5	100046450	100046970	1						0
as__ENSG00000251562 #or# as__ENSG00000278217 /// ENSG00000251562 #or# ENSG00000274072 /// ENSG00000251562 #or# ENSG00000278217 /// ENSG00000251562	MALAT1	metastasis associated lung adenocarcinoma transcript 1 (non-protein coding) /// metastasis associated lung adenocarcinoma transcript 1 (non-protein coding) #or# NA	918.184	83.5756	3.01362	5.04807e-35	34.2969	3.45763	11	65506386	65506516							1
ENSG00000200795	RNU4-1	RNA, U4 small nuclear 1	10.6843	0.973281	1.699	3.86339e-06	5.41303	3.45649	12	120293097	120293237							1
ENSG00000223396	RPS10P7	ribosomal protein S10 pseudogene 7	18.3345	1.67187	2.04208	1.13593e-08	7.94465	3.45503	1	201520056	201520549	1						0
ENSG00000026508	CD44	CD44 molecule (Indian blood group)	42.6275	3.95938	2.68394	5.36301e-21	20.2706	3.42844	11	35229334	35229789							1
ENSG00000230171	RPL22P18	ribosomal protein L22 pseudogene 18	40.0945	3.78349	2.52296	2.74091e-18	17.5621	3.40561	10	80125941	80126317	1						0
ENSG00000268993	RPL22P6	ribosomal protein L22 pseudogene 6	50.4976	4.76605	2.6701	2.94822e-23	22.5304	3.40535	1	121142051	121142438	1						0
ENSG00000258563	PSMA3P	proteasome subunit alpha 3 pseudogene	24.2709	2.29153	2.21505	6.15479e-11	10.2108	3.40485	14	60179382	60180016	1						0
ENSG00000149781	FERMT3	fermitin family member 3	14.5375	1.37399	1.79102	7.3125e-07	6.13593	3.40334	11	64223048	64223120							1
ENSG00000257243	AC020612.1	NA	30.8772	2.92572	2.40598	2.77098e-15	14.5574	3.39968	12	49595148	49595688		1					0
ENSG00000229399	AL592148.1	NA	44.505	4.24396	2.58984	2.26541e-19	18.6449	3.39048	1	222641414	222641858		1					0
ENSG00000235546	AC087499.4	NA	14.8702	1.43035	1.88985	7.41713e-08	7.12976	3.37798	17	20612667	20614008		1					0
ENSG00000269900 /// ENSG00000269900 #or# ENSG00000277027	RMRP	RNA component of mitochondrial RNA processing endoribonuclease #or# RNA component of mitochondrial RNA processing endoribonuclease /// RNA component of mitochondrial RNA processing endoribonuclease	17.3345	1.67187	2.02093	7.75802e-09	8.11025	3.37411	9	35657751	35658018							1
ENSG00000255435	AP001267.3	NA	25.0143	2.4129	2.32494	1.70362e-12	11.7686	3.37391	11	118519616	118519696		1					0
ENSG00000214297	ALDOAP2	aldolase, fructose-bisphosphate A pseudogene 2	21.9481	2.1243	2.18269	8.94518e-11	10.0484	3.36904	10	125666875	125667950	1						0
ENSG00000272888 #or# ENSG00000279765 /// ENSG00000279765	AC013394.1	NA /// long intergenic non-protein coding RNA 1578 #or# NA	18.3566	1.77995	2.02372	2.48096e-09	8.60538	3.36638	15	92948952	92949230		1					0
ENSG00000250568	AC098591.2	NA	69.9273	6.78226	2.84463	9.31624e-30	29.0308	3.36602	4	39973128	39973442		1					0
ENSG00000244405 /// ENSG00000058866 #or# ENSG00000244405	ETV5	ETS variant 5 /// diacylglycerol kinase gamma #or# ETS variant 5	11.21	1.09466	1.74047	1.44012e-06	5.8416	3.35624	3	186105410	186105496							1
ENSG00000261395	HSPE1P5	heat shock protein family E (Hsp10) member 1 pseudogene 5	173.315	16.9387	3.07302	4.03976e-64	63.3936	3.355	16	68686399	68686670	1						0
ENSG00000231313	CLIC1P1	chloride intracellular channel 1 pseudogene 1	17.359	1.72359	2.03354	5.35272e-09	8.27143	3.3322	12	120914400	120915123	1						0
ENSG00000219085	NPM1P37	nucleophosmin 1 pseudogene 37	71.3726	7.11734	2.82332	4.53743e-31	30.3432	3.32596	6	69705287	69706160	1						0
ENSG00000215035	FDPSP5	farnesyl diphosphate synthase pseudogene 5	27.0213	2.70151	2.31875	2.14295e-13	12.669	3.32226	0	44476027	44476622	1						0
ENSG00000133101	CCNA1	cyclin A1	30.8014	3.09696	2.45688	1.16695e-14	13.9329	3.31407	13	36442666	36442870							1
ENSG00000264186	SNRPCP4	small nuclear ribonucleoprotein polypeptide C pseudogene 4	26.7356	2.69224	2.29746	2.0707e-12	11.6839	3.31189	18	2990652	2991078	1						0
ENSG00000263464	PPIAL4C	peptidylprolyl isomerase A like 4C	50.3436	5.10576	2.58641	9.7323e-22	21.0118	3.30161	1	149584393	149584464							1
ENSG00000173163 #or# ENSG00000242735	RPSAP26	copper metabolism domain containing 1 #or# ribosomal protein SA pseudogene 26	79.6881	8.09587	2.82249	9.52555e-33	32.0211	3.29911	2	62146413	62147153	1						0
ENSG00000086730	LAT2	linker for activation of T cells family member 2	95.4131	9.70613	2.41109	7.00587e-14	13.1545	3.29722	7	74228944	74229072							1
ENSG00000260326	PHBP21	prohibitin pseudogene 21	29.3513	2.99413	2.37972	7.3096e-14	13.1361	3.29321	16	52934813	52935635	1						0
ENSG00000105379 #or# ENSG00000269403	AC008750.8	electron transfer flavoprotein subunit beta #or# NA	31.5029	3.21432	2.38527	6.69219e-15	14.1744	3.2929	19	51350373	51350391		1					0
ENSG00000218502	H2AFZP3	H2A histone family member Z pseudogene 3	107.929	11.0256	2.93165	1.87986e-41	40.7259	3.29115	13	99215372	99215758	1						0
ENSG00000252481	SCARNA13	small Cajal body-specific RNA 13	125.276	12.8068	2.95323	7.43036e-48	47.129	3.29013	14	95533355	95533629							1
ENSG00000228986	AC234781.3	NA	12.8823	1.32288	1.7729	6.90397e-07	6.1609	3.28363	0	155292802	155293432		1					0
ENSG00000259531	AC022306.1	NA	10.6037	1.09002	1.6484	5.75559e-06	5.23991	3.28214	15	49365124	49366685		1					0
ENSG00000224861	YBX1P1	Y-box binding protein 1 pseudogene 1	235.257	24.2532	2.93049	1.11425e-38	37.953	3.27799	14	66012830	66013789	1						0
ENSG00000243886	AC117440.1	NA	22.767	2.35253	2.15401	9.01356e-11	10.0451	3.27466	3	137535572	137536142		1					0
ENSG00000236603	RANP1	RAN, member RAS oncogene family pseudogene 1	307.617	31.7884	3.10776	1.58437e-106	105.8	3.27456	6	30485940	30486590	1						0
ENSG00000243777	AP000942.1	NA	112.335	11.7029	2.85156	9.65556e-44	43.0152	3.26287	11	102295060	102295806		1					0
ENSG00000235211	TMSB10P2	thymosin beta 10 pseudogene 2	49.0333	5.11101	2.56684	8.70746e-21	20.0601	3.26208	0	18341216	18341346	1						0
ENSG00000231480	SNRPGP13	small nuclear ribonucleoprotein polypeptide G pseudogene 13	12.6697	1.32227	1.82644	3.1596e-07	6.50037	3.2603	21	38502445	38502621	1						0
ENSG00000215063	RPL21P2	ribosomal protein L21 pseudogene 2	10.9852	1.15102	1.49632	4.84537e-05	4.31467	3.25458	20	4059633	4060113	1						0
ENSG00000004059	ARF5	ADP ribosylation factor 5	97.4037	10.2143	2.89974	5.0631e-40	39.2956	3.25339	7	127589485	127589831							1
ENSG00000259358	AC026951.1	NA	11.4812	1.20676	1.55375	2.14529e-05	4.66851	3.25006	15	31765743	31768201		1					0
ENSG00000237631	AL161454.1	NA	24.0069	2.52439	2.21847	1.05512e-11	10.9767	3.24944	9	95918136	95918704		1					0
ENSG00000076944 #or# ENSG00000268400 /// ENSG00000229833 #or# ENSG00000268400	AC008763.2	syntaxin binding protein 2 #or# NA /// PET100 homolog #or# NA	301.071	31.832	2.88941	7.10159e-40	39.1486	3.24155	19	7642034	7642118		1					0
ENSG00000283621 /// ENSG00000135446 #or# ENSG00000283621	MIR6759	microRNA 6759 /// cyclin dependent kinase 4 #or# microRNA 6759	33.5592	3.55465	2.37941	1.50025e-15	14.8238	3.23893	12	57748618	57748682				1			0
ENSG00000213740	SERBP1P1	SERPINE1 mRNA binding protein 1 pseudogene 1	165.185	17.5193	2.99388	4.7039e-57	56.3275	3.23706	0	68784224	68785066	1						0
ENSG00000170540 #or# ENSG00000260342 /// ENSG00000134419 #or# ENSG00000260342	AC138811.2	ribosomal protein S15a #or# NA /// ADP ribosylation factor like GTPase 6 interacting protein 1 #or# NA	2457.96	261.532	3.04373	2.02036e-73	72.6946	3.2324	16	18801467	18801519		1					0
ENSG00000259917	HNRNPLP2	heterogeneous nuclear ribonucleoprotein L pseudogene 2	39.2265	4.19626	2.52515	4.57054e-18	17.34	3.22465	15	34489002	34490571	1						0
ENSG00000175768	TOMM5	translocase of outer mitochondrial membrane 5	194.947	20.8782	2.99003	4.47484e-63	62.3492	3.22301	9	37588642	37588932							1
ENSG00000260389	WBP11P1	WW domain binding protein 11 pseudogene 1	10.1391	1.09404	1.60084	1.23375e-05	4.90877	3.21219	18	32511860	32513790	1						0
ENSG00000215006	CHCHD2P2	coiled-coil-helix-coiled-coil-helix domain containing 2 pseudogene 2	38.806	4.19286	2.41044	2.87563e-16	15.5413	3.21027	5	69333929	69334249	1						0
ENSG00000241478	HSPA8P9	heat shock protein family A (Hsp70) member 8 pseudogene 9	88.4503	9.62441	2.77554	6.16398e-35	34.2101	3.2001	3	137880295	137882237	1						0
ENSG00000240477	AC022494.1	NA	15.2782	1.66321	1.79468	3.00448e-07	6.52223	3.19943	3	150050729	150051456		1					0
ENSG00000259394	AC079328.1	NA	12.5522	1.37863	1.77107	7.31275e-07	6.13592	3.18663	15	62953173	62954124		1					0
ENSG00000227339	THRAP3P1	thyroid hormone receptor associated protein 3 pseudogene 1	11.4153	1.26652	1.69222	3.28951e-06	5.48287	3.17202	3	31455219	31455894	1						0
ENSG00000234106	SRP14P2	signal recognition particle 14 pseudogene 2	54.9299	6.09635	2.649	8.52245e-23	22.0694	3.17157	11	93535468	93535816	1						0
ENSG00000231300	EZH2P1	enhancer of zeste 2 polycomb repressive complex 2 subunit pseudogene 1	30.5005	3.3868	2.24702	4.9349e-13	12.3067	3.17084	21	35599732	35600022	1						0
ENSG00000271047	AC092447.9	NA	12.3492	1.37461	1.65287	6.04467e-06	5.21863	3.16733	7	56603410	56603553		1					0
ENSG00000250526	CCT6P2	chaperonin containing TCP1 subunit 6 pseudogene 2	100.111	11.1848	2.7979	3.55866e-38	37.4487	3.16199	5	14639426	14641018	1						0
ENSG00000118513	MYB	MYB proto-oncogene, transcription factor	53.2828	6.02392	2.49838	3.35135e-20	19.4748	3.1449	6	135203716	135203950							1
ENSG00000250644 /// ENSG00000117984 #or# ENSG00000250644	AC068580.4	NA /// cathepsin D #or# NA	35.8279	4.07612	2.38139	1.54007e-15	14.8125	3.13582	11	1747747	1748119		1					0
ENSG00000271072	PHBP20	prohibitin pseudogene 20	26.2194	2.98671	2.10635	3.10059e-11	10.5086	3.134	15	72450657	72451474	1						0
ENSG00000217130	AL139100.1	NA	154.126	17.5577	2.85339	1.02708e-53	52.9884	3.13394	6	34744176	34744673		1					0
ENSG00000222489	SNORA79B	small nucleolar RNA, H/ACA box 79B	35.625	4.07674	2.35829	2.19517e-15	14.6585	3.1274	14	20323179	20323326					1		0
ENSG00000226421	SLC25A5P5	solute carrier family 25 member 5 pseudogene 5	73.4679	8.44609	2.64973	1.21518e-27	26.9154	3.12076	7	32471513	32472409	1						0
ENSG00000236646	LAMTOR5P1	late endosomal/lysosomal adaptor, MAPK and MTOR activator 5 pseudogene 1	21.4666	2.46865	2.07451	2.23192e-10	9.65132	3.1203	1	62038842	62039111	1						0
ENSG00000214009	PCNAP3	proliferating cell nuclear antigen pseudogene 3	13.4766	1.55049	1.80004	5.69456e-07	6.24454	3.11966	0	46058751	46059528	1						0
ENSG00000225531	AL807761.2	NA	17.474	2.0122	1.96356	1.06282e-08	7.97354	3.11837	9	107116829	107117557		1					0
ENSG00000237406	NDUFA9P1	NADH:ubiquinone oxidoreductase subunit A9 pseudogene 1	13.408	1.54647	1.75538	6.88432e-07	6.16214	3.11604	22	35897270	35898404	1						0
ENSG00000103196	CRISPLD2	cysteine rich secretory protein LCCL domain containing 2	12.8775	1.48609	1.70907	2.04832e-06	5.6886	3.11525	16	84920397	84920768							1
ENSG00000215007	DNAJA1P3	DnaJ heat shock protein family (Hsp40) member A1 pseudogene 3	22.7502	2.63711	2.08623	1.13589e-10	9.94466	3.10885	0	107351650	107352843	1						0
ENSG00000213409	C1QBPP2	complement C1q binding protein pseudogene 2	124.518	14.4669	2.84868	4.53124e-48	47.3438	3.10553	11	66761575	66762399	1						0
ENSG00000111775 #or# ENSG00000111780 /// ENSG00000111780 #or# ENSG00000257218	AL021546.1	NA #or# glutamyl-tRNA amidotransferase subunit C /// cytochrome c oxidase subunit 6A1 #or# NA	308.25	36.0601	2.95181	7.58444e-106	105.12	3.09562	12	120459960	120460006		1					0
ENSG00000251235	SNRPCP2	small nuclear ribonucleoprotein polypeptide C pseudogene 2	16.1391	1.89144	1.86947	6.87001e-08	7.16304	3.093	5	76376675	76377149	1						0
ENSG00000089820 #or# ENSG00000284987 /// ENSG00000089820 /// ENSG00000089820 #or# ENSG00000102030	ARHGAP4	Rho GTPase activating protein 4 #or# N(alpha)-acetyltransferase 10, NatA catalytic subunit /// Rho GTPase activating protein 4 /// Rho GTPase activating protein 4 #or# NA	83.1865	9.7563	2.62217	1.30864e-29	28.8832	3.09194	0	153920739	153920808							1
ENSG00000067057 #or# ENSG00000278419	AL451164.3	phosphofructokinase, platelet #or# NA	30.7622	3.61441	2.31395	2.84651e-14	13.5457	3.08933	10	3144971	3145166		1					0
ENSG00000182179 #or# ENSG00000283726 /// ENSG00000182179	UBA7	ubiquitin like modifier activating enzyme 7 #or# microRNA 5193 /// ubiquitin like modifier activating enzyme 7	12.6915	1.49537	1.69817	2.69919e-06	5.56877	3.08529	3	49812448	49812543							1
ENSG00000230626	AC011005.1	NA	46.7642	5.51049	2.49403	1.45968e-20	19.8357	3.08515	7	129130749	129130793		1					0
ENSG00000235064	SLC25A5P2	solute carrier family 25 member 5 pseudogene 2	32.8894	3.90425	2.27411	5.48834e-14	13.2606	3.07451	2	33839782	33840678	1						0
ENSG00000254471	AP001284.1	NA	12.0707	1.43437	1.70155	2.61077e-06	5.58323	3.07302	11	79987513	79989630		1					0
ENSG00000265298	AC132812.1	NA	33.7917	4.02099	2.21678	9.06185e-13	12.0428	3.07104	17	64750420	64751311		1					0
ENSG00000105063	PPP6R1	protein phosphatase 6 regulatory subunit 1	47.0526	5.6331	2.40503	8.08582e-19	18.0923	3.06227	19	55247104	55247109							1
ENSG00000225487	AL390119.1	NA	318.362	38.2792	2.89515	6.12854e-95	94.2126	3.05603	1	164921318	164921629		1					0
ENSG00000225715	AL512504.1	NA	21.4199	2.58137	1.96176	2.47922e-09	8.60569	3.05274	0	80709928	80710705		1					0
ENSG00000261236 #or# ENSG00000284054	MIR7112	block of proliferation 1 #or# microRNA 7112	10.0096	1.21078	1.56207	1.88363e-05	4.725	3.04737	8	144262673	144262737				1			0
ENSG00000270694	AC211469.2	NA	15.6085	1.89206	1.78273	3.30871e-07	6.48034	3.04431	7	72722885	72723089		1					0
ENSG00000184730	APOBR	apolipoprotein B receptor	11.677	1.43035	1.61525	7.48488e-06	5.12582	3.02923	16	28498506	28498970							1
ENSG00000213177	PRDX2P4	peroxiredoxin 2 pseudogene 4	93.2424	11.539	2.64896	3.69507e-35	34.4324	3.01446	6	100136064	100136663	1						0
ENSG00000233080	LINC01399	long intergenic non-protein coding RNA 1399	30.5324	3.78813	2.11857	2.28898e-12	11.6404	3.01078	22	35194699	35194942			1				0
ENSG00000214593	AL354710.1	NA	10.5989	1.31825	1.54301	2.59219e-05	4.58633	3.00722	9	125263845	125264090		1					0
ENSG00000228328	AL158201.1	NA	27.6178	3.4512	2.17887	1.1054e-11	10.9565	3.00043	0	68070520	68071767		1					0
ENSG00000187193 #or# ENSG00000259827	AC026461.1	metallothionein 1X #or# NA	91.6017	11.4867	2.66444	1.13338e-35	34.9456	2.99541	16	56687578	56687807		1					0
ENSG00000228143	AL512649.1	NA	18.7381	2.35253	1.9397	1.0803e-08	7.96645	2.99369	9	106722350	106722930		1					0
ENSG00000231167	YBX1P2	Y-box binding protein 1 pseudogene 2	225.88	28.3684	2.82808	4.52826e-76	75.3441	2.9932	7	105582258	105583256	1						0
ENSG00000234176	HSPA8P1	heat shock protein family A (Hsp70) member 8 pseudogene 1	55.5393	7.00245	2.43532	2.85222e-21	20.5448	2.98758	0	121203182	121205014	1						0
ENSG00000105393 #or# ENSG00000269307	AC010463.1	BRISC and BRCA1 A complex member 1 #or# NA	12.2736	1.55111	1.67382	3.00571e-06	5.52205	2.98419	19	17282864	17282966		1					0
ENSG00000102879	CORO1A	coronin 1A	72.9446	9.25091	2.58079	1.38677e-26	25.858	2.97913	16	30188361	30188572							1
ENSG00000139180 #or# ENSG00000255639 /// ENSG00000139180 #or# ENSG00000272921 /// as__ENSG00000139180 #or# as__ENSG00000272921 /// as__ENSG00000139180 #or# as__ENSG00000255639 /// ENSG00000139180 #or# ENSG00000255639 #or# ENSG00000272921	AC005833.2	NADH:ubiquinone oxidoreductase subunit A9 #or# NA /// NADH:ubiquinone oxidoreductase subunit A9 #or# NA #or# NA	69.1795	8.77993	2.58814	1.80427e-27	26.7437	2.97806	12	4744517	4744581		1					0
ENSG00000168298	HIST1H1E	histone cluster 1 H1 family member e	25.378	3.22298	2.07511	1.86744e-10	9.72875	2.97711	6	26157051	26157107							1
ENSG00000133169	BEX1	brain expressed X-linked 1	85.213	10.8485	2.57801	2.46873e-29	28.6075	2.97358	0	103062651	103062896							1
ENSG00000213290	PGK1P2	phosphoglycerate kinase 1, pseudogene 2	22.0093	2.81299	2.07863	3.34333e-10	9.47582	2.96794	19	12560913	12561105	1						0
ENSG00000224820	BTF3P4	basic transcription factor 3 pseudogene 4	68.952	8.88925	2.48725	3.48277e-25	24.4581	2.95546	9	72107818	72108312	1						0
ENSG00000225536	STIP1P3	stress induced phosphoprotein 1 pseudogene 3	16.0633	2.07258	1.83429	1.09943e-07	6.95883	2.95427	0	86084716	86086339	1						0
ENSG00000240882	AC063952.2	NA	13.8187	1.78335	1.76938	6.17177e-07	6.20959	2.95396	3	120306726	120307952		1					0
ENSG00000279800	BCLAF1P2	BCL2 associated transcription factor 1 pseudogene 2	85.7803	11.147	2.57587	2.13758e-29	28.6701	2.94399	16	34266041	34268649	1						0
ENSG00000105988	NHP2P1	NHP2 ribonucleoprotein pseudogene 1	131.904	17.1629	2.65038	2.68933e-44	43.5704	2.94213	10	92216332	92216793	1						0
ENSG00000229022	AL365366.1	NA	27.8426	3.67015	2.09461	3.70554e-11	10.4311	2.92338	1	241831935	241832787		1					0
ENSG00000235698	PA2G4P2	proliferation-associated 2G4 pseudogene 2	26.6278	3.51158	2.12767	2.86251e-11	10.5433	2.92274	20	12380056	12381255	1						0
ENSG00000213383	AC104297.1	NA	78.5023	10.4478	2.56779	5.71791e-29	28.2428	2.90954	3	17871729	17872598		1					0
ENSG00000249119	MTND6P4	mitochondrially encoded NADH:ubiquinone oxidoreductase core subunit 6 pseudogene 4	320.463	43.0865	2.43503	4.83343e-20	19.3157	2.89485	5	134924123	134924644	1						0
ENSG00000213197	AC012066.1	NA	18.7452	2.52037	1.87142	1.94112e-08	7.71195	2.89482	2	152389937	152390630		1					0
ENSG00000237307	SRRM1P3	serine/arginine repetitive matrix 1 pseudogene 3	31.8796	4.30898	2.20098	1.0226e-13	12.9903	2.88721	0	136976417	136976476	1						0
ENSG00000187534	PRR13P5	proline rich 13 pseudogene 5	16.958	2.3008	1.85952	9.55186e-08	7.01991	2.88176	19	39943239	39943680	1						0
ENSG00000103426 #or# ENSG00000262246	CORO7-PAM16	CORO7-PAM16 readthrough #or# coronin 7	11.0096	1.49537	1.58121	1.04943e-05	4.97905	2.88019	16	4340941	4340985							1
ENSG00000235165	CDK5P1	cyclin dependent kinase 5 pseudogene 1	31.8233	4.35545	2.18017	2.35258e-13	12.6285	2.86919	8	122769274	122770150	1						0
ENSG00000255725	TDGP1	thymine-DNA glycosylase pseudogene 1	35.4929	4.87351	2.17754	8.31976e-14	13.0799	2.8645	12	25803298	25804526	1						0
ENSG00000257956	NOP56P3	NOP56 ribonucleoprotein pseudogene 3	15.0706	2.0766	1.80077	2.1794e-07	6.66166	2.85945	12	79558782	79559166	1						0
ENSG00000177855	CACYBPP2	calcyclin binding protein pseudogene 2	129.973	17.9791	2.6543	6.72092e-46	45.1726	2.85381	2	183607442	183608119	1						0
ENSG00000249193	HSPD1P5	heat shock protein family D (Hsp60) member 1 pseudogene 5	14.9384	2.06856	1.67867	1.47869e-06	5.83012	2.85233	4	144845625	144847344	1						0
ENSG00000280346	FP236240.3	NA	19.4202	2.69749	1.85744	3.60315e-08	7.44332	2.84787	21	6507017	6507389		1					0
ENSG00000210144 /// ENSG00000210140 #or# ENSG00000210144	MT-TY	mitochondrially encoded tRNA cysteine #or# mitochondrially encoded tRNA tyrosine /// mitochondrially encoded tRNA tyrosine	221.296	30.942	2.2592	9.51179e-15	14.0217	2.83834	0	5826	5891						1	0
ENSG00000229241	PNPT1P1	polyribonucleotide nucleotidyltransferase 1 pseudogene 1	18.0949	2.53366	1.84778	8.52729e-08	7.06919	2.83628	3	3981981	3984295	1						0
ENSG00000254406	AP001994.1	NA	75.7976	10.6209	2.47354	7.0648e-28	27.1509	2.83525	11	119821304	119822129		1					0
ENSG00000224488	SAMM50P1	SAMM50 sorting and assembly machinery component pseudogene 1	21.7672	3.05111	1.95794	1.58128e-09	8.80099	2.83475	9	17447145	17448543	1						0
ENSG00000205662	FAM239C	family with sequence similarity 239 member C (non-protein coding)	13.4764	1.89082	1.66325	2.07083e-06	5.68386	2.83336	0	3929869	3931782							1
ENSG00000229738	AC010240.1	NA	14.7478	2.07258	1.77561	2.52409e-07	6.5979	2.83101	5	132987652	132988110		1					0
ENSG00000226273	AC079305.2	NA	14.2664	2.00818	1.62649	4.90177e-06	5.30965	2.82866	2	177177695	177178255		1					0
ENSG00000231397	AC004941.2	NA	10.9458	1.54647	1.50556	2.80239e-05	4.55247	2.82333	7	149321865	149322092		1					0
ENSG00000249098	AC055733.1	NA	51.5172	7.28518	2.31835	7.81084e-18	17.1073	2.82202	3	130918226	130918703		1					0
ENSG00000262902	MTCO1P40	mitochondrially encoded cytochrome c oxidase I pseudogene 40	249.68	35.5167	1.78544	6.53625e-07	6.18467	2.81351	17	53105734	53106358	1						0
ENSG00000254481	PTP4A2P2	protein tyrosine phosphatase type IVA, member 2 pseudogene 2	20.139	2.86534	1.86951	1.52353e-08	7.81715	2.81321	11	134123828	134124329	1						0
ENSG00000205097	FRG2	FSHD region gene 2	23.8136	3.39082	2.04543	7.70739e-10	9.11309	2.81208	4	190024367	190025560							1
ENSG00000241723	AC074276.1	NA	26.9579	3.84325	2.05508	1.49034e-11	10.8267	2.81031	3	158275809	158276421		1					0
ENSG00000232499	AL391058.1	NA	18.6745	2.69811	1.78277	1.04738e-07	6.9799	2.79105	1	113449700	113450728		1					0
ENSG00000213956	AC112187.1	NA	16.2051	2.34789	1.76011	2.15427e-07	6.6667	2.78702	5	50633124	50633602		1					0
ENSG00000225787	LSM3P3	LSM3 homolog, U6 small nuclear RNA and mRNA degradation associated pseudogene 3	61.8963	9.00537	2.35666	4.38892e-22	21.3576	2.78099	2	85102389	85102694	1						0
ENSG00000264229	RNU4ATAC	RNA, U4atac small nuclear (U12-dependent splicing)	89.2633	12.9904	1.42927	9.28395e-05	4.03227	2.78062	2	121530881	121531007							1
ENSG00000277952	AC092745.3	NA	21.8797	3.21432	1.90827	4.40391e-09	8.35616	2.767	12	8340182	8340397		1					0
ENSG00000214460	TPT1P6	tumor protein, translationally-controlled 1 pseudogene 6	22.5447	3.33044	1.94562	4.36914e-10	9.3596	2.759	6	85427453	85427966	1						0
ENSG00000214391	TUBAP2	tubulin alpha pseudogene 2	586.89	86.7241	2.70628	3.03818e-156	155.517	2.75858	11	90282560	90284172	1						0
ENSG00000256849	TCP1P3	t-complex 1 pseudogene 3	37.7499	5.57952	2.25285	6.55375e-15	14.1835	2.75826	12	19941521	19943018	1						0
ENSG00000215349	MRPL3P1	mitochondrial ribosomal protein L3 pseudogene 1	34.9624	5.17016	2.15854	3.25749e-13	12.4871	2.75752	13	19304593	19305625	1						0
ENSG00000163806 #or# ENSG00000213639 /// ENSG00000163806	SPDYA	speedy/RINGO cell cycle regulator family member A #or# protein phosphatase 1 catalytic subunit beta /// speedy/RINGO cell cycle regulator family member A	10.7479	1.60685	1.4967	4.13422e-05	4.38361	2.74175	2	28842012	28842276							1
ENSG00000113296	THBS4	thrombospondin 4	14.6036	2.18468	1.63182	3.39896e-06	5.46865	2.74083	5	80083080	80083188							1
ENSG00000255883	FUNDC2P1	FUN14 domain containing 2 pseudogene 1	11.1391	1.66785	1.47837	5.15598e-05	4.28769	2.73957	5	73508685	73509254	1						0
ENSG00000185839	AL035411.1	NA	51.3117	7.68713	2.24032	7.35795e-19	18.1332	2.73877	1	58630841	58631530		1					0
ENSG00000205579	DYNLL1P1	dynein light chain LC8-type 1 pseudogene 1	58.979	8.85206	2.26555	7.84959e-20	19.1052	2.73612	14	81246295	81246563	1						0
ENSG00000261208	AL365475.1	NA	13.2074	2.00756	1.54558	1.57996e-05	4.80135	2.71783	14	52287975	52289268		1					0
ENSG00000237922	AL450309.1	NA	11.6552	1.7747	1.49001	3.3556e-05	4.47423	2.71532	1	236285976	236286276		1					0
ENSG00000232662	LDHBP1	lactate dehydrogenase B pseudogene 1	11.6648	1.77933	1.53435	2.45549e-05	4.60986	2.71275	13	113276616	113277734	1						0
ENSG00000227176	AC092641.1	NA	14.6181	2.2364	1.60281	4.23336e-06	5.37332	2.70851	2	170077224	170077594		1					0
ENSG00000202337	RNU6-8	RNA, U6 small nuclear 8	57.0529	8.7313	2.22656	6.08798e-17	16.2155	2.70803	14	32203163	32203269							1
ENSG00000188460	ACTBP11	actin, beta pseudogene 11	17.6109	2.69749	1.77107	1.47148e-07	6.83225	2.70678	1	223863726	223864851	1						0
ENSG00000092929	UNC13D	unc-13 homolog D	11.6111	1.77933	1.55258	1.75211e-05	4.75644	2.70609	17	75843159	75843266							1
ENSG00000092853	CLSPN	claspin	244.047	37.4607	2.57451	2.03488e-64	63.6915	2.70371	1	35746965	35746992							1
ENSG00000264281	AC016596.2	NA	421.684	64.9141	2.60594	8.12232e-112	111.09	2.69956	5	55944656	55944733		1					0
ENSG00000236480	PKMP1	pyruvate kinase M1/2 pseudogene 1	18.5643	2.86472	1.82321	9.5648e-08	7.01932	2.69607	1	114537777	114537840	1						0
ENSG00000234825	XRCC6P2	X-ray repair cross complementing 6 pseudogene 2	192.879	29.7901	2.53946	3.43783e-58	57.4637	2.69479	0	150231075	150232896	1						0
ENSG00000213866	YBX1P10	Y-box binding protein 1 pseudogene 10	69.9126	10.8537	2.34079	5.68014e-24	23.2456	2.68736	9	35971344	35972318	1						0
ENSG00000257576	HSPD1P4	heat shock protein family D (Hsp60) member 1 pseudogene 4	54.2993	8.43682	2.21788	3.04102e-18	17.517	2.68616	12	56511002	56512703	1						0
ENSG00000271711	AC069236.1	NA	14.8017	2.3008	1.67696	1.11636e-06	5.9522	2.68556	3	150611262	150611877		1					0
ENSG00000256745	AP002784.2	NA	178.282	27.8169	2.48343	1.27093e-51	50.8959	2.68013	11	94188449	94188997		1					0
ENSG00000235400	AC104837.1	NA	16.2075	2.52903	1.74635	4.24441e-07	6.37218	2.68001	1	78749073	78750659		1					0
ENSG00000258373	SLC25A3P2	solute carrier family 25 member 3 pseudogene 2	92.8682	14.5298	2.37945	5.02847e-30	29.2986	2.67617	12	111992996	111993875	1						0
ENSG00000176840	MIR7-3HG	MIR7-3 host gene	109.956	17.2065	2.00454	2.50497e-09	8.6012	2.67591	19	4772132	4772514				1			0
ENSG00000240135	PSMD12P	proteasome 26S subunit, non-ATPase, 12 pseudogene	37.7547	5.97497	2.18565	7.66578e-15	14.1154	2.65965	3	72876737	72878102	1						0
ENSG00000213148	AC073465.1	NA	120.728	19.1187	2.41532	1.98143e-36	35.703	2.65871	2	173431349	173431812		1					0
ENSG00000226493	RPL26P27	ribosomal protein L26 pseudogene 27	13.024	2.07258	1.54948	1.65819e-05	4.78037	2.65167	10	68499532	68499968	1						0
ENSG00000133124 /// ENSG00000133124 #or# ENSG00000260548	IRS4	insulin receptor substrate 4 #or# NA /// insulin receptor substrate 4	35.0333	5.5755	2.11716	4.63385e-13	12.3341	2.65155	0	108732482	108732570							1
ENSG00000232864	NUCKS1P1	nuclear casein kinase and cyclin dependent kinase substrate 1 pseudogene 1	66.1085	10.5227	2.30799	9.33937e-23	22.0297	2.65133	1	227410617	227411319	1						0
ENSG00000198695	MT-ND6	mitochondrially encoded NADH:ubiquinone oxidoreductase core subunit 6	4622.03	735.873	2.36556	2.92534e-25	24.5338	2.651	0	14149	14151						1	0
ENSG00000106829 #or# ENSG00000240979	AL353813.1	transducin like enhancer of split 4 #or# NA	25.1679	4.02378	1.95138	1.96677e-09	8.70625	2.64497	9	79726069	79726321		1					0
ENSG00000104774	MAN2B1	mannosidase alpha class 2B member 1	18.6745	2.9861	1.77466	1.62782e-07	6.78839	2.64474	19	12665246	12665525							1
ENSG00000213684	LDHBP2	lactate dehydrogenase B pseudogene 2	333.973	53.45	2.54278	2.34725e-97	96.6294	2.64347	0	76334841	76335845	1						0
ENSG00000230508	RPL19P21	ribosomal protein L19 pseudogene 21	59.5589	9.53488	2.29002	1.09212e-20	19.9617	2.64303	0	150993501	150994091	1						0
ENSG00000256393	RPL41P5	ribosomal protein L41 pseudogene 5	466.15	74.8773	2.53436	2.19643e-103	102.658	2.63819	12	93083598	93083675	1						0
ENSG00000228938	SNRPD2P1	small nuclear ribonucleoprotein D2 pseudogene 1	437.575	70.6769	2.56882	2.56661e-125	124.591	2.63022	10	89978717	89979070	1						0
ENSG00000226535	AL445487.1	NA	62.7419	10.1598	2.23942	6.96944e-20	19.1568	2.62656	9	107169569	107171148		1					0
ENSG00000250444	CCT5P1	chaperonin containing TCP1 subunit 5 pseudogene 1	72.3823	11.7236	2.35	1.57134e-25	24.8037	2.62622	5	115512077	115513694	1						0
ENSG00000226415	TPI1P1	triosephosphate isomerase 1 pseudogene 1	83.101	13.4856	2.34115	1.48205e-27	26.8291	2.62345	1	76699789	76700538	1						0
ENSG00000198744 /// ENSG00000198744 #or# ENSG00000248527	MTCO3P12	mitochondrially encoded cytochrome c oxidase III pseudogene 12 /// mitochondrially encoded cytochrome c oxidase III pseudogene 12 #or# mitochondrially encoded ATP synthase 6 pseudogene 1	1441.03	234.133	2.3829	3.40964e-30	29.4673	2.6217	1	634376	634922	1						0
ENSG00000260103	AC012435.1	NA	50.9252	8.27578	2.26812	9.96838e-17	16.0014	2.62141	15	74481025	74481130		1					0
ENSG00000229161	TCP1P1	t-complex 1 pseudogene 1	171.713	28.0101	2.45926	1.5726e-53	52.8034	2.61598	7	42802369	42802494	1						0
ENSG00000214915	BX546450.1	NA	22.5496	3.68345	1.9322	2.7529e-08	7.56021	2.61397	0	151515894	151516245		1					0
ENSG00000214357	NEURL1B	neuralized E3 ubiquitin protein ligase 1B	12.6768	2.07258	1.50348	3.30131e-05	4.48131	2.6127	5	172686926	172691540							1
ENSG00000074370	ATP2A3	ATPase sarcoplasmic/endoplasmic reticulum Ca2+ transporting 3	23.1414	3.78689	1.89865	1.80207e-09	8.74423	2.61139	17	3953281	3953429							1
ENSG00000227514	AC107890.1	NA	11.2075	1.83508	1.39604	0.000123193	3.90941	2.61056	8	113377065	113377227		1					0
ENSG00000249541	AC116359.1	NA	11.2075	1.8357	1.43336	8.06162e-05	4.09358	2.61007	5	2787451	2788549		1					0
ENSG00000151846	PABPC3	poly(A) binding protein cytoplasmic 3	480.124	78.6408	2.53518	6.44999e-99	98.1904	2.61006	13	25098095	25099254							1
ENSG00000259707	AC105339.4	NA	34.9164	5.73871	2.01884	2.5423e-12	11.5948	2.60511	15	82691723	82692358		1					0
ENSG00000118058	KMT2A	lysine methyltransferase 2A	1939.35	319.568	2.5186	1.84461e-93	92.7341	2.60138	11	118521897	118522409							1
ENSG00000241081	RPL22P2	ribosomal protein L22 pseudogene 2	102.905	16.9978	2.36049	7.52129e-34	33.1237	2.5979	14	76886377	76886750	1						0
ENSG00000239374	AC090013.1	NA	91.7586	15.273	2.3583	2.52674e-29	28.5974	2.58686	12	116755395	116755874		1					0
ENSG00000220744	RPL5P18	ribosomal protein L5 pseudogene 18	39.5445	6.59587	2.08047	1.36893e-14	13.8636	2.58384	6	127362513	127363403	1						0
ENSG00000260747	AC022968.1	NA	27.8014	4.64869	1.93182	2.38101e-10	9.62324	2.58026	18	68277802	68278243		1					0
ENSG00000233028	AC006970.2	NA	23.6084	3.95072	1.81132	1.50002e-08	7.8239	2.57911	7	56175634	56176412		1					0
ENSG00000230750	SDAD1P2	SDA1 domain containing 1 pseudogene 2	23.618	3.95938	1.88052	1.86883e-09	8.72843	2.57654	20	10385779	10387806	1						0
ENSG00000255059	PPIAP43	peptidylprolyl isomerase A pseudogene 43	63.7564	10.7801	2.17667	1.15782e-20	19.9364	2.5642	11	100666459	100666962	1						0
ENSG00000230392	AC004835.1	NA	18.0117	3.05049	1.74821	1.01949e-06	5.99162	2.56182	0	119333050	119335610		1					0
ENSG00000253223	AC110998.1	NA	15.6133	2.64515	1.68939	1.09255e-06	5.96156	2.56136	8	66984135	66986187		1					0
ENSG00000227344	HAUS6P1	HAUS augmin like complex subunit 6 pseudogene 1	14.5399	2.46927	1.53176	1.31365e-05	4.88152	2.55786	7	53187388	53188938	1						0
ENSG00000255977	AC006927.1	NA	16.5279	2.80836	1.64446	2.60232e-06	5.58464	2.55711	12	7606834	7607331		1					0
ENSG00000213370	RANP6	RAN, member RAS oncogene family pseudogene 6	22.2734	3.78751	1.80351	1.17369e-08	7.93045	2.556	4	173633728	173634371	1						0
ENSG00000233383	AC073089.1	NA	73.0109	12.4519	2.23021	7.5607e-24	23.1214	2.55174	7	67089257	67089470		1					0
ENSG00000227890	PSMA2P3	proteasome subunit alpha 2 pseudogene 3	216.717	36.9795	2.40863	1.45016e-62	61.8386	2.55101	2	202179297	202179971	1						0
ENSG00000104904 #or# ENSG00000273734	AC005258.1	ornithine decarboxylase antizyme 1 #or# NA	11.7381	2.0122	1.4453	6.72643e-05	4.17222	2.54435	19	2340898	2341172		1					0
ENSG00000231822	AC019097.1	NA	31.1389	5.33862	1.96508	4.39263e-11	10.3573	2.54418	2	99102018	99102752		1					0
ENSG00000227968	BUB3P1	BUB3 mitotic checkpoint protein pseudogene 1	25.6156	4.42387	1.93648	3.51723e-10	9.4538	2.53364	7	108994031	108995029	1						0
ENSG00000253785	AC008429.2	NA	130.606	22.6077	2.33062	1.26201e-38	37.8989	2.53034	5	172975511	172976374		1					0
ENSG00000229083	PSMA6P2	proteasome subunit alpha 6 pseudogene 2	79.4359	13.794	2.21461	1.13618e-24	23.9446	2.52575	0	12826669	12826833	1						0
ENSG00000233229	CNOT7P1	CCR4-NOT transcription complex subunit 7 pseudogene 1	16.87	2.92974	1.65215	1.3971e-06	5.85477	2.52562	0	69937166	69938017	1						0
ENSG00000213080	AL354714.2	NA	11.2125	1.95244	1.39443	0.000111086	3.95434	2.52177	1	160894980	160896076		1					0
ENSG00000168283 #or# ENSG00000269897	COMMD3-BMI1	BMI1 proto-oncogene, polycomb ring finger #or# COMMD3-BMI1 readthrough	11.5351	2.0122	1.44358	5.54584e-05	4.25603	2.51919	10	22326431	22326521							1
ENSG00000248795	AC098859.1	NA	10.5353	1.83971	1.37805	0.000152545	3.8166	2.51768	4	138560704	138561941		1					0
ENSG00000270706	PRMT1P1	protein arginine methyltransferase 1 pseudogene 1	69.9837	12.225	2.16417	5.07299e-22	21.2947	2.51719	5	177265580	177266588	1						0
ENSG00000106366	SERPINE1	serpin family E member 1	18.0804	3.1626	1.7499	7.20083e-07	6.14262	2.51524	7	101137443	101139266							1
ENSG00000213867	AL049830.1	NA	232.888	40.9272	2.39189	1.75209e-62	61.7564	2.50851	14	30821419	30821843		1					0
ENSG00000236444	UBE2L5	ubiquitin conjugating enzyme E2 L5	16.6157	2.92572	1.6114	2.70468e-06	5.56788	2.50568	13	30428453	30428455							1
ENSG00000230911	PPIHP1	peptidylprolyl isomerase H pseudogene 1	66.3066	11.7022	2.16604	3.58582e-21	20.4454	2.50237	11	112029858	112030367	1						0
ENSG00000254780	AC023232.1	NA	112.024	19.812	2.28046	6.03251e-34	33.2195	2.49936	11	47905323	47905607		1					0
ENSG00000224114	AL591846.1	NA	60.2701	10.7317	2.13442	2.37827e-18	17.6237	2.48956	1	206695837	206696269		1					0
ENSG00000230360	DDX10P2	DEAD-box helicase 10 pseudogene 2	17.7332	3.15796	1.70312	2.4366e-07	6.61322	2.48939	9	82086155	82088768	1						0
ENSG00000276180	HIST1H4I	histone cluster 1 H4 family member i	125.454	22.3742	2.29639	6.93793e-38	37.1588	2.48725	6	27139621	27139881							1
ENSG00000220739	AL513475.2	NA	13.7551	2.45937	1.54266	8.15261e-06	5.0887	2.48361	6	144708106	144708497		1					0
ENSG00000237264	FTH1P11	ferritin heavy chain 1 pseudogene 11	81.3209	14.5781	2.16216	1.16072e-25	24.9353	2.47982	8	81521682	81522232	1						0
ENSG00000217648	AL136116.3	NA	14.6744	2.63186	1.52041	1.57454e-05	4.80285	2.47915	6	143342246	143343383		1					0
ENSG00000230832	AC241584.1	NA	40.219	7.23531	1.95936	3.4558e-13	12.4615	2.47475	1	147082338	147083578		1					0
ENSG00000267185	PTP4A2P1	protein tyrosine phosphatase type IVA, member 2 pseudogene 1	22.4713	4.06622	1.68338	4.63643e-07	6.33382	2.46632	17	42533532	42534009	1						0
ENSG00000118939 #or# ENSG00000261553 /// ENSG00000136153 #or# ENSG00000261553	AL137782.1	LIM domain 7 #or# NA /// ubiquitin C-terminal hydrolase L3 #or# NA	170.762	30.9312	2.32035	4.12182e-50	49.3849	2.46485	13	75623271	75623320		1					0
ENSG00000232905	AL162393.1	NA	27.3023	4.99304	1.80947	9.57222e-09	8.01899	2.45103	9	113850687	113851632		1					0
ENSG00000213430	HSPD1P1	heat shock protein family D (Hsp60) member 1 pseudogene 1	209.641	38.3418	2.3272	3.22384e-58	57.4916	2.45093	5	21882585	21884310	1						0
ENSG00000007545 #or# ENSG00000261732 /// ENSG00000261732 /// ENSG00000206053 #or# ENSG00000261732	AL031708.1	Jupiter microtubule associated homolog 2 #or# NA /// cramped chromatin regulator homolog 1 #or# NA /// NA	12.1488	2.2364	1.40524	7.58832e-05	4.11985	2.44156	16	1685757	1686715		1					0
ENSG00000224781	EIF4A2P4	eukaryotic translation initiation factor 4A2 pseudogene 4	10.2688	1.89144	1.29759	0.000387563	3.41166	2.44071	0	52832704	52833899	1						0
ENSG00000223908	AC068657.1	NA	12.8139	2.36118	1.51811	1.63665e-05	4.78604	2.44013	5	160023740	160024045		1					0
ENSG00000234819	AL353705.4	NA	27.4641	5.10638	1.79204	2.63647e-09	8.57898	2.42717	9	78219120	78219357		1					0
ENSG00000225630	MTND2P28	mitochondrially encoded NADH:ubiquinone oxidoreductase core subunit 2 pseudogene 28	1899.29	353.237	2.25005	1.47219e-32	31.832	2.42675	1	629640	630683	1						0
ENSG00000236334	PPIAL4G	peptidylprolyl isomerase A like 4G	52.0796	9.68943	2.04415	2.25541e-16	15.6468	2.42624	1	148479824	148482757							1
ENSG00000233830	EIF4HP1	eukaryotic translation initiation factor 4H pseudogene 1	10.8237	2.01683	1.3846	0.000132303	3.87843	2.42402	7	27458163	27458849	1						0
ENSG00000124216	SNAI1	snail family transcriptional repressor 1	20.9457	3.90765	1.75013	1.7094e-07	6.76716	2.42228	20	49988057	49988886							1
ENSG00000265646	TUFMP1	Tu translation elongation factor, mitochondrial pseudogene 1	71.0572	13.2574	2.14718	1.28208e-22	21.8921	2.42219	17	27082690	27084036	1						0
ENSG00000135363	LMO2	LIM domain only 2	26.4787	4.94193	1.8556	2.00797e-09	8.69724	2.42169	11	33869545	33869586							1
ENSG00000265735	RN7SL5P	RNA, 7SL, cytoplasmic 5, pseudogene	32.0042	5.97621	1.9226	7.57299e-11	10.1207	2.42096	9	9442060	9442380	1						0
ENSG00000210176 #or# ENSG00000210184 /// ENSG00000210176	MT-TH	mitochondrially encoded tRNA histidine #or# mitochondrially encoded tRNA serine 2 (AGU/C) /// mitochondrially encoded tRNA histidine	69.5114	12.9907	1.478	4.04808e-05	4.39275	2.41977	0	12138	12206						1	0
ENSG00000257043	AP006296.1	NA	69.4385	12.9808	2.15021	3.54897e-20	19.4499	2.41935	11	18665050	18665548		1					0
ENSG00000259340	AC110588.1	NA	16.7429	3.1626	1.61123	1.52191e-06	5.81761	2.40436	15	96551381	96551517		1					0
ENSG00000225496	AC104651.1	NA	108.533	20.5066	2.19745	3.24735e-32	31.4885	2.40398	2	111940302	111941036		1					0
ENSG00000250273	PSMC1P5	proteasome 26S subunit, ATPase 1 pseudogene 5	39.1482	7.40656	1.95117	3.43199e-13	12.4645	2.40207	5	107195156	107195332	1						0
ENSG00000197406	DIO3	iodothyronine deiodinase 3	10.0022	1.89607	1.2751	0.000527693	3.27762	2.39923	14	101562412	101563452							1
ENSG00000178928	TPRX1	tetrapeptide repeat homeobox 1	15.1512	2.87337	1.59494	1.13633e-05	4.94449	2.39861	19	47801480	47801774							1
ENSG00000130755	GMFG	glia maturation factor gamma	17.5473	3.33044	1.64055	1.12118e-06	5.95033	2.39746	19	39332904	39333126							1
ENSG00000226055	PAICSP1	phosphoribosylaminoimidazole carboxylase, phosphoribosylaminoimidazole succinocarboxamide synthetase pseudogene 1	14.7992	2.80898	1.48439	2.58816e-05	4.58701	2.39741	9	37878942	37879493	1						0
ENSG00000242222	AC092989.1	NA	33.0408	6.32118	1.86887	2.37037e-10	9.62518	2.38598	3	135925891	135926167		1					0
ENSG00000279483	AC090498.1	NA	2232.58	427.388	2.18695	5.04674e-28	27.297	2.38509	7	137513859	137513933		1					0
ENSG00000249353	NPM1P27	nucleophosmin 1 pseudogene 27	615.195	118.144	2.35496	1.21445e-153	152.916	2.38049	5	93682838	93683667	1						0
ENSG00000259001 /// ENSG00000259001 #or# ENSG00000277209	AL355075.4	NA /// NA #or# ribonuclease P RNA component H1	27.1411	5.22126	1.78844	1.59307e-08	7.79776	2.37801	14	20343048	20343685		1					0
ENSG00000217241	CBX3P9	chromobox 3 pseudogene 9	80.1817	15.4414	2.13763	2.62083e-23	22.5816	2.37647	6	116453014	116453565	1						0
ENSG00000183889 #or# ENSG00000244257 /// ENSG00000244257	PKD1P1	NA #or# polycystin 1, transient receptor potential channel interacting pseudogene 1 /// polycystin 1, transient receptor potential channel interacting pseudogene 1	14.2834	2.75323	1.50874	1.68266e-05	4.774	2.37514	16	16334109	16334190	1						0
ENSG00000224834	BTF3P9	basic transcription factor 3 pseudogene 9	166.752	32.1993	2.26792	4.03474e-47	46.3942	2.3726	1	227434064	227434346	1						0
ENSG00000234289 /// ENSG00000274559 /// as__ENSG00000274559	H2BFS	H2B histone family member S	16.2736	3.15456	1.49327	1.28616e-05	4.8907	2.36702	21	43565620	43565648							1
ENSG00000231369	Z97353.1	NA	108.105	21.0578	2.12661	4.40708e-30	29.3558	2.36	22	26886909	26887316		1					0
ENSG00000223550	SNRPBP1	small nuclear ribonucleoprotein polypeptides B and B1 pseudogene 1	84.8347	16.5262	2.15554	3.60793e-25	24.4427	2.3599	7	80377554	80377835	1						0
ENSG00000213312	RPL7AP34	ribosomal protein L7a pseudogene 34	59.1966	11.5477	2.05463	5.44937e-19	18.2637	2.35791	6	63548708	63549508	1						0
ENSG00000121552	CSTA	cystatin A	16.5105	3.22236	1.17767	0.00139871	2.85427	2.3572	3	122337673	122338270							1
ENSG00000227063	RPL41P1	ribosomal protein L41 pseudogene 1	2188.71	428.975	2.15371	5.64737e-27	26.2482	2.35112	20	21755270	21755350	1						0
ENSG00000015285	WAS	Wiskott-Aldrich syndrome	11.66	2.29678	1.3327	0.000210019	3.67774	2.34388	0	48689320	48689594							1
ENSG00000172974	AC007318.1	NA	220.54	43.4494	2.2231	2.24381e-56	55.649	2.34363	2	65205108	65205988		1					0
ENSG00000236565	HNRNPA3P5	heterogeneous nuclear ribonucleoprotein A3 pseudogene 5	54.1655	10.6732	1.98469	1.34162e-15	14.8724	2.34338	13	65787932	65788764	1						0
ENSG00000272540	AL662797.1	NA	20.6769	4.08014	1.70239	1.30791e-07	6.88342	2.34133	6	30723105	30723877		1					0
ENSG00000163286	ALPG	alkaline phosphatase, germ cell	45.4979	8.9824	1.5792	1.20043e-05	4.92066	2.34063	2	232409873	232410714							1
ENSG00000128253	RFPL2	ret finger protein like 2	34.6692	6.84666	1.86807	1.75055e-09	8.75683	2.34018	22	32190706	32191352							1
ENSG00000186517	ARHGAP30	Rho GTPase activating protein 30	13.9459	2.75787	1.50022	1.36646e-05	4.8644	2.33822	1	161054402	161054473							1
ENSG00000237719	Z95152.1	NA	57.1577	11.3062	1.99769	6.79228e-17	16.168	2.33784	6	36091991	36092646		1					0
ENSG00000267533	AP002414.4	NA	10.7429	2.13296	1.26786	0.000494876	3.3055	2.33246	18	12067173	12068259		1					0
ENSG00000237828	PA2G4P1	proliferation-associated 2G4 pseudogene 1	95.5309	18.9973	2.11033	1.54112e-27	26.8122	2.33017	0	120868611	120869807	1						0
ENSG00000230067	HSPD1P6	heat shock protein family D (Hsp60) member 1 pseudogene 6	27.679	5.5111	1.76182	2.64788e-09	8.5771	2.32838	3	36768725	36769260	1						0
ENSG00000064300	NGFR	nerve growth factor receptor	28.1953	5.62723	1.79286	5.88315e-09	8.23039	2.32496	17	49513010	49513372							1
ENSG00000215221	UBA52P6	ubiquitin A-52 residue ribosomal protein fusion product 1 pseudogene 6	11.7358	2.35654	1.42096	5.42183e-05	4.26585	2.31617	9	22012155	22012536	1						0
ENSG00000270141 #or# ENSG00000277925	TERC	telomerase RNA component #or# NA	184.311	37.2139	2.1758	1.61529e-44	43.7917	2.30822	3	169764520	169765060							1
ENSG00000235808	MYL6P2	myosin light chain 6 pseudogene 2	26.1413	5.28288	1.73547	2.59514e-08	7.58584	2.30693	21	39488327	39488760	1						0
ENSG00000268282	AC010328.2	NA	23.87	4.82581	1.72308	1.80103e-08	7.74448	2.30636	19	53004040	53005150		1					0
ENSG00000232387	SKA2P1	spindle and kinetochore associated complex subunit 2 pseudogene 1	39.7426	8.03611	1.85675	4.96944e-12	11.3037	2.30612	9	122761844	122762233	1						0
ENSG00000215086	NPM1P24	nucleophosmin 1 pseudogene 24	263.176	53.3156	2.22365	4.17275e-61	60.3796	2.3034	10	72917641	72918534	1						0
ENSG00000226964	RHEBP2	RHEB pseudogene 2	18.3469	3.72311	1.52166	5.56046e-06	5.25489	2.30095	10	47706203	47706802	1						0
ENSG00000235674	LDHAP2	lactate dehydrogenase A pseudogene 2	10.4056	2.11966	1.26829	0.000504826	3.29686	2.29545	1	235738005	235738989	1						0
ENSG00000228168	HNRNPA1P21	heterogeneous nuclear ribonucleoprotein A1 pseudogene 21	14.8775	3.03782	1.44435	2.02551e-05	4.69347	2.29203	3	39334979	39335939	1						0
ENSG00000214998	CCNB2P1	cyclin B2 pseudogene 1	53.0868	10.8503	1.92452	2.22152e-15	14.6533	2.29061	7	7909300	7910449	1						0
ENSG00000267293	AC012569.1	NA	19.5545	4.01512	1.61255	6.43119e-07	6.19171	2.28399	18	46028306	46029829		1					0
ENSG00000225611	LINC02158	long intergenic non-protein coding RNA 2158	10.3275	2.12368	1.28611	0.000481904	3.31704	2.28185	3	42773205	42773635			1				0
ENSG00000254449	SF3A3P2	splicing factor 3a, subunit 3 pseudogene 2	45.2532	9.30727	1.9116	1.36272e-13	12.8656	2.28159	11	123597946	123599452	1						0
ENSG00000236078	LINC01447	long intergenic non-protein coding RNA 1447	44.17	9.0911	1.97381	4.18195e-12	11.3786	2.28054	7	47628697	47629893			1				0
ENSG00000259179	UBE2CP4	ubiquitin conjugating enzyme E2 C pseudogene 4	22.8555	4.70505	1.64226	2.71085e-07	6.56689	2.28026	15	31420128	31420662	1						0
ENSG00000216285	AC078819.1	NA	20.2783	4.18822	1.63015	5.22259e-07	6.28211	2.27553	12	104030779	104031543		1					0
ENSG00000234241	AL109618.1	NA	50.3117	10.3939	1.90352	2.44969e-14	13.6109	2.27516	20	6213699	6215381		1					0
ENSG00000253346	AC109329.1	NA	11.408	2.35716	1.31854	0.000230008	3.63826	2.27492	8	30331961	30332277		1					0
ENSG00000243759	ST13P15	ST13, Hsp70 interacting protein pseudogene 15	10.5498	2.18004	1.30137	0.000329363	3.48233	2.27479	3	143517123	143518229	1						0
ENSG00000214110	LDHAP4	lactate dehydrogenase A pseudogene 4	15.2735	3.15796	1.532	8.74432e-06	5.05827	2.27397	9	14921337	14922334	1						0
ENSG00000225695	HNRNPA1P35	heterogeneous nuclear ribonucleoprotein A1 pseudogene 35	59.3875	12.3352	1.98675	7.93448e-18	17.1005	2.26738	2	201063089	201064051	1						0
ENSG00000232699	BDH2P1	3-hydroxybutyrate dehydrogenase 2, pseudogene 1	24.5376	5.11565	1.6579	4.78967e-08	7.31969	2.26201	6	99174744	99175479	1						0
ENSG00000258648	UBE2CP1	ubiquitin conjugating enzyme E2 C pseudogene 1	118.606	24.754	2.09671	3.56142e-33	32.4484	2.26045	14	30683045	30683598	1						0
ENSG00000188219	POTEE	POTE ankyrin domain family member E	12.09	2.52965	1.34381	0.000176525	3.75319	2.25681	2	131263355	131263591							1
ENSG00000255642	PABPC1P4	poly(A) binding protein cytoplasmic 1 pseudogene 4	155.59	32.5622	2.15339	4.82474e-39	38.3165	2.25648	12	63822021	63823895	1						0
ENSG00000229927 /// ENSG00000165874 #or# ENSG00000229927	RHEBP1	RHEB pseudogene 1 /// family with sequence similarity 35 member B, pseudogene #or# RHEB pseudogene 1	10.6843	2.2364	1.2878	0.000293999	3.53165	2.25624	10	46634911	46635466	1						0
ENSG00000267741	UBE2L4	ubiquitin conjugating enzyme E2 L4 (pseudogene)	41.1042	8.60467	1.85526	1.69202e-12	11.7716	2.2561	19	9774497	9774960	1						0
ENSG00000189171 #or# ENSG00000271853	AL162258.1	S100 calcium binding protein A13 #or# NA	115.382	24.1582	2.08142	4.98821e-31	30.3021	2.25583	1	153627508	153627598		1					0
ENSG00000206228	HNRNPA1P4	heterogeneous nuclear ribonucleoprotein A1 pseudogene 4	61.6417	12.9143	1.94089	1.36339e-17	16.8654	2.25494	8	82291624	82292379	1						0
ENSG00000210151	MT-TS1	mitochondrially encoded tRNA serine 1 (UCN)	68.7901	14.4235	1.24997	0	?	2.25378	0	7446	7514						1	0
ENSG00000100867	DHRS2	dehydrogenase/reductase 2	93.2399	19.602	2.11347	9.16178e-22	21.038	2.24994	14	23643045	23645639							1
ENSG00000127824	TUBA4A	tubulin alpha 4a	38.2387	8.04941	1.85518	1.05981e-11	10.9748	2.24808	2	219252788	219252993							1
ENSG00000166847 #or# ENSG00000260482	AC008870.1	dynactin subunit 5 #or# NA	16.618	3.49829	1.47756	9.96755e-06	5.00141	2.24803	16	23675194	23675499		1					0
ENSG00000250329	KDELC1P1	KDEL motif containing 1 pseudogene 1	10.3372	2.18004	1.27184	0.000368507	3.43355	2.24542	5	128109486	128110994	1						0
ENSG00000235411	AC007041.1	NA	90.9784	19.2416	2.0594	2.22695e-25	24.6523	2.24129	2	20239892	20241046		1					0
ENSG00000254244	PAICSP4	phosphoribosylaminoimidazole carboxylase, phosphoribosylaminoimidazole succinocarboxamide synthetase pseudogene 4	39.0137	8.26094	1.76229	4.28904e-11	10.3676	2.2396	8	4787332	4788584	1						0
ENSG00000260335	AC133555.4	NA	20.8872	4.4251	1.6198	7.61584e-07	6.11828	2.23883	16	29449521	29449625		1					0
ENSG00000236493	EIF2S2P3	eukaryotic translation initiation factor 2 subunit 2 beta pseudogene 3	20.0288	4.2486	1.60068	4.55287e-07	6.34172	2.23702	10	92668745	92669743	1						0
ENSG00000201998	SNORA23	small nucleolar RNA, H/ACA box 23	10.0119	2.1243	1.25405	0.000549328	3.26017	2.23666	11	9428773	9428954					1		0
ENSG00000232578	AC093311.1	NA	10.8018	2.29616	1.33455	0.000199187	3.70074	2.23398	5	94592771	94594791		1					0
ENSG00000214203	RPS4XP1	ribosomal protein S4X pseudogene 1	114.108	24.4635	2.09152	1.41254e-30	29.85	2.22169	12	100009052	100009838	1						0
ENSG00000215905	AL590609.1	NA	35.5834	7.64746	1.82807	1.12812e-10	9.94764	2.21815	1	24007881	24007965		1					0
ENSG00000182921	CCDC75P1	coiled-coil domain containing 75 pseudogene 1	10.1391	2.18004	1.22282	0.000774346	3.11106	2.2175	3	73182501	73183291	1						0
ENSG00000255973	AC137627.1	NA	10.9387	2.35314	1.24119	0.00066084	3.1799	2.21678	12	5583797	5584085		1					0
ENSG00000238076	MRPL48P1	mitochondrial ribosomal protein L48 pseudogene 1	30.6178	6.60638	1.67531	9.27961e-09	8.03247	2.21244	6	10459906	10460541	1						0
ENSG00000223559	AC073136.1	NA	12.7454	2.75323	1.36469	0.000111766	3.95169	2.21078	7	56289896	56291425		1					0
ENSG00000240371	RPS4XP13	ribosomal protein S4X pseudogene 13	1238.76	268.094	2.13289	5.61118e-65	64.2509	2.20808	11	57576292	57577080	1						0
ENSG00000198658	ABHD17AP1	abhydrolase domain containing 17A pseudogene 1	25.4175	5.50585	1.68216	2.20682e-08	7.65623	2.20678	1	148149161	148149566	1						0
ENSG00000232203	SLC25A6P2	solute carrier family 25 member 6 pseudogene 2	68.918	14.9299	1.97328	7.20588e-20	19.1423	2.20668	9	31253901	31254777	1						0
ENSG00000236972	FABP5P1	fatty acid binding protein 5 pseudogene 1	25.3249	5.5111	1.63915	8.08855e-08	7.09213	2.20014	13	73100575	73100985	1						0
ENSG00000183171	BX322650.1	NA	28.163	6.14406	1.71298	6.66311e-09	8.17632	2.19654	0	150114378	150116520		1					0
ENSG00000237285	HNRNPA1P2	heterogeneous nuclear ribonucleoprotein A1 pseudogene 2	27.3369	5.96755	1.67466	1.75913e-08	7.7547	2.19564	6	32325219	32326178	1						0
ENSG00000172803	SNX32	sorting nexin 32	11.0094	2.41754	1.2385	0.000685196	3.16418	2.18713	11	65851328	65851348							1
ENSG00000275924 /// ENSG00000130726 #or# ENSG00000275924	MIR6807	tripartite motif containing 28 #or# microRNA 6807 /// microRNA 6807	165.725	36.3974	2.07494	7.53443e-38	37.1229	2.18688	19	58550285	58550376				1			0
ENSG00000250672	AC010343.2	NA	14.8725	3.2747	1.429	2.84698e-05	4.54562	2.18321	5	33090126	33090349		1					0
ENSG00000258741	H2AFVP1	H2A histone family member V pseudogene 1	53.6566	11.8178	1.90516	1.69711e-15	14.7703	2.1828	15	92733823	92734195	1						0
ENSG00000231744	AL669818.1	NA	35.7546	7.8763	1.78265	1.78746e-10	9.74776	2.18254	9	124598707	124599157		1					0
ENSG00000179967	PPP1R14BP3	protein phosphatase 1 regulatory inhibitor subunit 14B pseudogene 3	346.176	76.5594	2.10152	6.89139e-74	73.1617	2.17685	4	139114930	139115374	1						0
ENSG00000283041 #or# ENSG00000284135	MIR3654	NA #or# microRNA 3654	1200.94	265.771	2.13949	5.40195e-159	158.267	2.17591	7	133034860	133034915				1			0
ENSG00000210195	MT-TT	mitochondrially encoded tRNA threonine	59.0644	13.0979	1.37149	9.47738e-05	4.02331	2.17296	0	15888	15953						1	0
ENSG00000213082	PPP1R14BP2	protein phosphatase 1 regulatory inhibitor subunit 14B pseudogene 2	58.7133	13.0211	1.83971	8.43353e-14	13.074	2.17284	2	207681590	207682033	1						0
ENSG00000204253	HNRNPCP2	heterogeneous nuclear ribonucleoprotein C pseudogene 2	168.576	37.4818	2.03228	2.88193e-39	38.5403	2.16913	2	189923336	189924216	1						0
ENSG00000238072	AC009244.1	NA	40.691	9.07905	1.78031	1.15466e-11	10.9375	2.1641	7	129410113	129410370		1					0
ENSG00000228253 /// ENSG00000210156 #or# ENSG00000228253	MT-ATP8	mitochondrially encoded ATP synthase membrane subunit 8 /// mitochondrially encoded tRNA lysine #or# mitochondrially encoded ATP synthase membrane subunit 8	396.809	88.6682	1.5363	5.10927e-06	5.29164	2.16196	0	8570	8572						1	0
ENSG00000169359 #or# ENSG00000284952 /// ENSG00000284952	AC104472.3	NA /// solute carrier family 33 member 1 #or# NA	13.1465	2.93839	1.40775	7.13826e-05	4.14641	2.16158	3	155763043	155763918		1					0
ENSG00000241923	RPL14P3	ribosomal protein L14 pseudogene 3	25.6962	5.7486	1.63354	5.74364e-08	7.24081	2.16027	4	140366240	140366861	1						0
ENSG00000258605	DYNLL1P2	dynein light chain LC8-type 1 pseudogene 2	37.9723	8.4972	1.78333	1.49245e-11	10.8261	2.15989	14	81412970	81413239	1						0
ENSG00000224415	AC007683.1	NA	107.903	24.1721	1.98951	1.23642e-28	27.9078	2.15831	7	103141349	103141939		1					0
ENSG00000256843	AC023157.2	NA	14.6085	3.2747	1.36516	8.87837e-05	4.05167	2.15737	12	31748100	31748240		1					0
ENSG00000243974	VTI1BP1	vesicle transport through interaction with t-SNAREs 1B pseudogene 1	12.9925	2.93035	1.30378	0.000137274	3.86241	2.14853	3	100225374	100226073	1						0
ENSG00000237686	AL109615.3	NA	171.676	38.7316	2.09003	3.89387e-37	36.4096	2.14811	6	43997182	43997308		1					0
ENSG00000233328	PFN1P1	profilin 1 pseudogene 1	514.985	116.755	1.99096	1.88441e-28	27.7248	2.14105	1	171670517	171670939	1						0
ENSG00000233476	EEF1A1P6	eukaryotic translation elongation factor 1 alpha 1 pseudogene 6	1744.18	395.589	2.11335	3.18714e-199	198.497	2.14047	7	22510616	22511999	1						0
ENSG00000229251	HNRNPA1P8	heterogeneous nuclear ribonucleoprotein A1 pseudogene 8	33.8845	7.70104	1.70466	3.15811e-10	9.50057	2.1375	7	84983556	84984506	1						0
ENSG00000280120	AC073857.1	NA	13.4154	3.05049	1.35558	0.000142829	3.84518	2.13677	12	123152324	123153377		1					0
ENSG00000213661	AC106806.1	NA	20.9361	4.77409	1.5642	9.0252e-07	6.04454	2.13269	5	121616247	121616807		1					0
ENSG00000264112	AC015813.1	NA	10.342	2.36118	1.27036	0.000414459	3.38252	2.13094	17	57989044	57989796		1					0
ENSG00000230457	PA2G4P4	proliferation-associated 2G4 pseudogene 4	252.3	57.7258	2.03514	4.1464e-56	55.3823	2.12785	3	156809551	156810732	1						0
ENSG00000183426 #or# ENSG00000183458 /// ENSG00000183458	AC138932.1	NA /// nuclear pore complex interacting protein family member A1 #or# NA	10.2736	2.35314	1.18889	0.000897817	3.04681	2.12628	16	14922001	14922087		1					0
ENSG00000219375	AL139095.1	NA	269.858	61.9333	2.03319	5.30891e-54	53.275	2.12341	6	7331286	7331676		1					0
ENSG00000206567	AC022007.1	NA	23.0409	5.28813	1.53245	1.37314e-06	5.86229	2.12337	3	10009888	10010402		1					0
ENSG00000081665	ZNF506	zinc finger protein 506	12.2735	2.81825	1.28623	0.000230781	3.6368	2.12267	19	19820255	19820666							1
ENSG00000186197 /// ENSG00000186197 #or# ENSG00000244457	EDARADD	EDAR associated death domain #or# enolase 1 pseudogene 1 /// EDAR associated death domain	306.11	70.418	2.05277	2.25962e-69	68.646	2.12003	1	236502840	236502915							1
ENSG00000231416	AL358472.1	NA	952.255	219.23	1.95349	1.87657e-24	23.7266	2.1189	1	153995632	153995960		1					0
ENSG00000258895	AC104390.1	NA	23.4176	5.39498	1.55368	5.23511e-07	6.28107	2.1179	15	94033658	94034177		1					0
ENSG00000244535	AL049714.1	NA	132.932	30.6593	1.97866	1.70723e-29	28.7677	2.11629	11	32758268	32758614		1					0
ENSG00000141526	SLC16A3	solute carrier family 16 member 3	24.8896	5.74335	1.6339	1.6008e-07	6.79566	2.11558	17	82261096	82261129							1
ENSG00000226284	ARPC3P1	actin related protein 2/3 complex subunit 3 pseudogene 1	24.0778	5.56283	1.5474	5.62359e-07	6.24999	2.11381	20	49134480	49135012	1						0
ENSG00000173614 #or# ENSG00000241326	AL603962.1	nicotinamide nucleotide adenylyltransferase 1 #or# NA	18.1389	4.19688	1.49605	5.77328e-06	5.23858	2.1117	1	9984283	9984568		1					0
ENSG00000242689 #or# ENSG00000255073 /// ENSG00000186660 #or# ENSG00000255073	ZFP91-CNTF	ZFP91 zinc finger protein #or# ZFP91-CNTF readthrough (NMD candidate) /// ciliary neurotrophic factor #or# ZFP91-CNTF readthrough (NMD candidate)	22.5643	5.22775	1.50902	1.16489e-06	5.93371	2.10978	11	58624034	58624639							1
ENSG00000234782	TPT1P9	tumor protein, translationally-controlled 1 pseudogene 9	785.317	182.272	2.05023	6.05591e-100	99.2178	2.10718	9	118082869	118083382	1						0
ENSG00000230953	AC099677.1	NA	31.1412	7.22944	1.6993	1.95104e-09	8.70973	2.10687	1	52920422	52920596		1					0
ENSG00000276380	UBE2NL	ubiquitin conjugating enzyme E2 N like (gene/pseudogene)	16.0755	3.73579	1.44975	2.33266e-05	4.63215	2.10538	0	143884563	143885255	1						0
ENSG00000180448	ARHGAP45	Rho GTPase activating protein 45	41.9013	9.76249	1.81313	4.18016e-12	11.3788	2.10167	19	1085660	1086628							1
ENSG00000183199	HSP90AB3P	heat shock protein 90 alpha family class B member 3, pseudogene	266.893	62.2698	2.02823	1.04192e-56	55.9822	2.09966	4	87891843	87894015	1						0
ENSG00000210112 /// ENSG00000198763 #or# ENSG00000210112	MT-TM	mitochondrially encoded tRNA methionine /// mitochondrially encoded NADH:ubiquinone oxidoreductase core subunit 2 #or# mitochondrially encoded tRNA methionine	72.4871	16.9467	1.84785	5.6984e-16	15.2442	2.09672	0	4402	4469						1	0
ENSG00000177197	PCNPP5	PEST containing nuclear protein pseudogene 5	10.5401	2.46927	1.20808	0.000795589	3.09931	2.09374	13	48328084	48328564	1						0
ENSG00000214552	COPS8P2	COP9 signalosome subunit 8 pseudogene 2	21.5472	5.05002	1.53367	5.82319e-07	6.23484	2.09314	3	68145004	68145630	1						0
ENSG00000166530	HSBP1P2	heat shock factor binding protein 1 pseudogene 2	15.8822	3.73579	1.39327	3.56924e-05	4.44742	2.08793	4	110251871	110252099	1						0
ENSG00000214881	TMEM14DP	transmembrane protein 14D, pseudogene	12.4716	2.93375	1.33315	0.000149329	3.82586	2.08782	10	68544489	68544833	1						0
ENSG00000256093	AC122688.1	NA	15.6133	3.67479	1.44176	1.44944e-05	4.8388	2.08704	12	125056359	125056581		1					0
ENSG00000219039	AC005102.1	NA	19.0094	4.47621	1.51266	4.691e-06	5.32873	2.08637	7	75835663	75836141		1					0
ENSG00000233662	CALM2P4	calmodulin 2 pseudogene 4	11.205	2.64113	1.22531	0.000509565	3.2928	2.08492	13	98640814	98641239	1						0
ENSG00000130303	BST2	bone marrow stromal cell antigen 2	12.6086	2.97682	1.27614	0.000351488	3.45409	2.08256	19	17403791	17403824							1
ENSG00000235489	DBF4P1	DBF4 zinc finger pseudogene 1	42.8938	10.1499	1.75596	2.75877e-11	10.5593	2.0793	10	64168959	64170850	1						0
ENSG00000214263	RPSAP53	ribosomal protein SA pseudogene 53	13.8042	3.27006	1.36495	7.08902e-05	4.14941	2.07772	13	67266845	67267706	1						0
ENSG00000220583	RPL35P2	ribosomal protein L35 pseudogene 2	1183.89	281.147	2.04321	3.75834e-157	156.425	2.07414	6	34263311	34263673	1						0
ENSG00000255363	AP001189.5	NA	35.3441	8.40055	1.763	1.12695e-08	7.94809	2.07291	11	76628096	76628481		1					0
ENSG00000234639	AC009263.1	NA	14.0047	3.33044	1.37284	7.05696e-05	4.15138	2.07212	7	138023559	138024339		1					0
ENSG00000229107	ABHD17AP4	abhydrolase domain containing 17A pseudogene P4	10.3494	2.46803	1.27286	0.000383968	3.41571	2.06811	22	20667836	20668220	1						0
ENSG00000244705	AC020658.1	NA	13.2076	3.1592	1.27555	0.000225403	3.64704	2.06374	15	40312352	40313289		1					0
ENSG00000179743	AL450998.2	NA	34.8331	8.38046	1.68193	1.75015e-09	8.75693	2.05536	1	15834474	15836906		1					0
ENSG00000279159	AC003681.1	NA	17.8701	4.30434	1.42446	1.34297e-05	4.87193	2.05368	22	29978950	30028236		1					0
ENSG00000233859	ADH5P4	alcohol dehydrogenase 5 (class III), chi polypeptide, pseudogene 4	37.3245	9.00414	1.6656	8.40609e-10	9.07541	2.05146	6	65836930	65838039	1						0
ENSG00000213592	PPIAP42	peptidylprolyl isomerase A pseudogene 42	17.1462	4.13712	1.39224	2.66976e-05	4.57353	2.0512	11	57718044	57718530	1						0
ENSG00000180574	EIF2S3B	eukaryotic translation initiation factor 2 subunit gamma B	16.205	3.91291	1.37194	4.37819e-05	4.35871	2.05012	12	10507322	10507491							1
ENSG00000258262	AC063949.1	NA	54.3655	13.1366	1.77386	3.22233e-14	13.4918	2.0491	12	92530460	92531324		1					0
ENSG00000168918	INPP5D	inositol polyphosphate-5-phosphatase D	61.2504	14.8038	1.82532	1.00631e-16	15.9973	2.04875	2	233205598	233205652							1
ENSG00000242017	ALG1L15P	asparagine-linked glycosylation 1-like 15, pseudogene	12.3469	2.98548	1.31623	0.000184496	3.73401	2.04812	3	156044155	156044948	1						0
ENSG00000242849	ALDOAP1	aldolase, fructose-bisphosphate A pseudogene 1	12.8187	3.10222	1.2939	0.000275787	3.55943	2.04688	3	52194472	52194785	1						0
ENSG00000179131	AC073335.1	NA	62.9697	15.2696	1.81509	4.16072e-15	14.3808	2.044	7	66914581	66914943		1					0
ENSG00000214855	APOC1P1	apolipoprotein C1 pseudogene 1	42.3513	10.2793	1.76956	9.48853e-12	11.0228	2.04266	19	44931000	44931058	1						0
ENSG00000263366	ABHD17AP5	abhydrolase domain containing 17A pseudogene 5	14.1463	3.44316	1.30298	0.000138857	3.85743	2.03862	22	22114844	22115245	1						0
ENSG00000213126	AC092642.1	NA	20.4788	4.98964	1.46379	2.1182e-06	5.67403	2.03712	2	179814251	179814675		1					0
ENSG00000196834	POTEI	POTE ankyrin domain family member I	10.6085	2.58477	1.26693	0.000396399	3.40187	2.03712	2	130463908	130464144							1
ENSG00000214035	AC073310.1	NA	11.0755	2.70151	1.24719	0.000514223	3.28885	2.03554	7	145009961	145010993		1					0
ENSG00000225580	AL358942.1	NA	27.2855	6.65687	1.60106	3.36341e-08	7.47322	2.03522	6	112616703	112617880		1					0
ENSG00000196154	S100A4	S100 calcium binding protein A4	28.4519	6.94825	1.59107	3.68333e-07	6.43376	2.0338	1	153543621	153543758							1
ENSG00000125740	FOSB	FosB proto-oncogene, AP-1 transcription factor subunit	18.2808	4.48084	1.4806	6.27699e-06	5.20225	2.02849	19	45472551	45473067							1
ENSG00000137074 #or# ENSG00000225693 /// ENSG00000225693	LAGE3P1	aprataxin #or# L antigen family member 3 pseudogene 1 /// L antigen family member 3 pseudogene 1	65.529	16.0648	1.7437	3.55252e-15	14.4495	2.02823	9	33019682	33020165	1						0
ENSG00000230146	SEPHS1P4	selenophosphate synthetase 1 pseudogene 4	13.804	3.38619	1.3165	0.000139623	3.85504	2.02736	0	73769248	73770423	1						0
ENSG00000165474	GJB2	gap junction protein beta 2	12.6648	3.10686	1.28576	0.000307158	3.51264	2.0273	13	20187470	20188900							1
ENSG00000248873	SERBP1P6	SERPINE1 mRNA binding protein 1 pseudogene 6	15.8944	3.89962	1.35902	5.78588e-05	4.23763	2.02711	5	42465400	42466012	1						0
ENSG00000258016	HIGD1AP1	HIG1 hypoxia inducible domain family member 1A pseudogene 1	29.2266	7.17834	1.60778	1.91053e-08	7.71885	2.02556	12	53142053	53142327	1						0
ENSG00000130396	AFDN	afadin, adherens junction formation factor	1589.93	390.624	1.96145	6.83602e-54	53.1652	2.02511	6	167969782	167969903							1
ENSG00000235044	PPIAP3	peptidylprolyl isomerase A pseudogene 3	14.6842	3.61503	1.35004	5.30599e-05	4.27523	2.02219	20	37530039	37530543	1						0
ENSG00000162924	REL	REL proto-oncogene, NF-kB subunit	26.7008	6.59247	1.48948	1.2244e-06	5.91208	2.01799	2	60900992	60901083							1
ENSG00000100344 #or# ENSG00000100347 /// ENSG00000100344	PNPLA3	patatin like phospholipase domain containing 3 /// patatin like phospholipase domain containing 3 #or# SAMM50 sorting and assembly machinery component	33.295	8.22127	1.66219	2.43573e-09	8.61337	2.01787	22	43939336	43939393							1
ENSG00000237973	MTCO1P12	mitochondrially encoded cytochrome c oxidase I pseudogene 12	2434.69	603.074	1.49268	4.61187e-06	5.33612	2.01333	1	631074	632616	1						0
ENSG00000240622	RPL7P15	ribosomal protein L7 pseudogene 15	54.5411	13.546	1.73332	6.11595e-13	12.2135	2.00948	3	124151960	124152516	1						0
ENSG00000233594	BTF3P5	basic transcription factor 3 pseudogene 5	99.7561	24.7964	1.84066	1.68328e-23	22.7738	2.00827	2	55435156	55435622	1						0
ENSG00000230592	RPSAP8	ribosomal protein SA pseudogene 8	74.1427	18.4734	1.82832	1.53306e-17	16.8144	2.00486	0	100155885	100156773	1						0
ENSG00000227347	HNRNPKP2	heterogeneous nuclear ribonucleoprotein K pseudogene 2	13.8089	3.44316	1.25253	0.000258621	3.58734	2.00379	2	136199114	136200503	1						0
ENSG00000231007	CDC20P1	cell division cycle 20 pseudogene 1	122.885	30.6645	1.88709	2.27596e-29	28.6428	2.00267	9	87011652	87013151	1						0
ENSG00000213938	SEPHS1P6	selenophosphate synthetase 1 pseudogene 6	11.2711	2.81361	1.1705	0.00095861	3.01836	2.00213	2	199659551	199660729	1						0
ENSG00000005381	MPO	myeloperoxidase	201.348	0	5.44686	6.34214e-74	73.1978	?	17	58279876	58280014							1
ENSG00000114455	HHLA2	HERV-H LTR-associating 2	17.54	0	2.68039	4.82241e-14	13.3167	?	3	108376612	108378285							1
ENSG00000271503	CCL5	C-C motif chemokine ligand 5	41.3733	0	3.68301	5.41272e-29	28.2666	?	17	35872002	35872269							1
ENSG00000133048	CHI3L1	chitinase 3 like 1	21.8259	0	2.8477	1.34307e-15	14.8719	?	1	203179998	203180652							1
ENSG00000111348	ARHGDIB	Rho GDP dissociation inhibitor beta	80.4724	0	3.87225	7.6969e-30	29.1137	?	12	14950713	14950724							1
ENSG00000101425 /// ENSG00000101425 #or# ENSG00000285144	BPI	bactericidal permeability increasing protein #or# NA /// bactericidal permeability increasing protein	10.2125	0	2.01252	4.14773e-08	7.38219	?	20	38337146	38337261							1
ENSG00000124491	F13A1	coagulation factor XIII A chain	10.8067	0	2.01616	3.87158e-08	7.41211	?	6	6305113	6305300							1
ENSG00000143546	S100A8	S100 calcium binding protein A8	48.2484	0	2.88824	2.11345e-15	14.675	?	1	153390204	153390243							1
ENSG00000198848	CES1	carboxylesterase 1	37.1188	0	3.5692	9.4836e-27	26.023	?	16	55821429	55821521							1
ENSG00000140678	ITGAX	integrin subunit alpha X	12.4008	0	2.26887	4.76962e-10	9.32152	?	16	31372597	31372654							1
ENSG00000011600	TYROBP	TYRO protein tyrosine kinase binding protein	17.6866	0	2.64982	7.91641e-14	13.1015	?	19	35907294	35907580							1
ENSG00000229391	HLA-DRB6	major histocompatibility complex, class II, DR beta 6 (pseudogene)	10.6745	0	2.04821	2.34745e-08	7.6294	?	6	32553046	32553072	1						0
ENSG00000167613	LAIR1	leukocyte associated immunoglobulin like receptor 1	12.9291	0	2.25516	6.31486e-10	9.19964	?	19	54368189	54368700							1
ENSG00000185862 #or# ENSG00000265118 /// ENSG00000185862	EVI2B	ecotropic viral integration site 2B #or# NA /// ecotropic viral integration site 2B	16.5032	0	2.52963	2.91175e-12	11.5358	?	17	31304234	31304262							1
ENSG00000257764	AC020656.1	NA	56.3188	0	4.04797	2.65385e-36	35.5761	?	12	69353493	69353608		1					0
ENSG00000126860 #or# ENSG00000265118 /// ENSG00000126860	EVI2A	ecotropic viral integration site 2A /// ecotropic viral integration site 2A #or# NA	10.3372	0	2.05346	2.10554e-08	7.67664	?	17	31317560	31318302							1
ENSG00000165178	NCF1C	neutrophil cytosolic factor 1C pseudogene	20.4691	0	2.85529	9.01599e-16	15.045	?	7	75156639	75156915	1						0
ENSG00000104055	TGM5	transglutaminase 5	14.7478	0	2.4697	6.39475e-12	11.1942	?	15	43239212	43239266							1
ENSG00000186652 #or# ENSG00000254979 /// ENSG00000134802 #or# ENSG00000254979	AP000781.2	solute carrier family 43 member 3 #or# NA /// proteoglycan 2, pro eosinophil major basic protein #or# NA	12.3372	0	2.27597	4.12213e-10	9.38488	?	11	57389155	57389317		1					0
ENSG00000172232	AZU1	azurocidin 1	85.2107	0	4.50471	1.36991e-47	46.8633	?	19	831878	832018							1
ENSG00000172236	TPSAB1	tryptase alpha/beta 1	10.8824	0	2.1267	6.19432e-09	8.20801	?	16	1242241	1242516							1
ENSG00000100448	CTSG	cathepsin G	174.574	0	4.40837	3.35008e-38	37.4749	?	14	24573556	24573636							1
ENSG00000151062	CACNA2D4	calcium voltage-gated channel auxiliary subunit alpha2delta 4	18.2856	0	2.68624	3.97335e-14	13.4008	?	12	1884030	1884321							1
ENSG00000204936	CD177	CD177 molecule	15.0754	0	2.45742	8.61513e-12	11.0647	?	19	43362088	43362372							1
ENSG00000169385	RNASE2	ribonuclease A family member 2	53.385	0	3.5385	8.51166e-25	24.07	?	14	20956258	20956436							1
ENSG00000182487	NCF1B	neutrophil cytosolic factor 1B pseudogene	13.4789	0	2.38031	5.07319e-11	10.2947	?	7	73235662	73235787	1						0
ENSG00000172716	SLFN11	schlafen family member 11	10.9362	0	2.09798	1.05405e-08	7.97714	?	17	35367266	35367700							1
ENSG00000163220	S100A9	S100 calcium binding protein A9	109.259	0	4.34373	2.54555e-39	38.5942	?	1	153360839	153361027							1
ENSG00000164821	DEFA4	defensin alpha 4	48.9108	0	3.35821	1.08226e-21	20.9657	?	8	6935822	6936019							1
ENSG00000164825	DEFB1	defensin beta 1	27.3908	0	3.07692	8.84704e-19	18.0532	?	8	6870575	6870680							1
ENSG00000160883	HK3	hexokinase 3	10.0119	0	1.94043	1.14727e-07	6.94033	?	5	176889661	176889744							1
ENSG00000197561	ELANE	elastase, neutrophil expressed	68.5022	0	3.75787	7.4277e-28	27.1291	?	19	856165	856242							1
ENSG00000138964	PARVG	parvin gamma	19.672	0	2.83821	1.20703e-15	14.9183	?	22	44219484	44219533							1
ENSG00000119535	CSF3R	colony stimulating factor 3 receptor	25.481	0	3.14139	1.45243e-19	18.8379	?	1	36479497	36479516							1
ENSG00000137462	TLR2	toll like receptor 2	12.6061	0	2.23137	1.13035e-09	8.94679	?	4	153704851	153705259							1
ENSG00000043462	LCP2	lymphocyte cytosolic protein 2	10.7527	0	2.0484	2.34634e-08	7.62961	?	5	170287717	170288016							1
ENSG00000104518	GSDMD	gasdermin D	15.6133	0	2.5406	2.23025e-12	11.6516	?	8	143562670	143563062							1
ENSG00000104043	ATP8B4	ATPase phospholipid transporting 8B4 (putative)	13.2857	0	2.33982	1.17865e-10	9.92861	?	15	50106967	50107008							1
ENSG00000258982	AL133523.1	NA	11.408	0	2.05764	1.11107e-08	7.95426	?	14	100207407	100207652		1					0
ENSG00000100365	NCF4	neutrophil cytosolic factor 4	16.7575	0	2.6049	3.21179e-13	12.4933	?	22	36877628	36877764							1
ENSG00000256804	AC138466.2	NA	15.0265	0	2.44137	1.78227e-11	10.749	?	12	132126461	132126764		1					0
ENSG00000170627	GTSF1	gametocyte specific factor 1	10.677	0	2.10667	6.99153e-09	8.15543	?	12	54468925	54468953							1
ENSG00000110934	BIN2	bridging integrator 2	14.3493	0	2.42484	2.20077e-11	10.6574	?	12	51322748	51323088							1
ENSG00000158517	NCF1	neutrophil cytosolic factor 1	14.3493	0	2.43851	1.21236e-11	10.9164	?	7	74785182	74785546							1
ENSG00000230564	CALM1P2	calmodulin 1 pseudogene 2	18.0825	72.7966	-1.83013	2.10544e-15	14.6767	-2.00928	7	55259809	55260256	1						0
ENSG00000210164 /// ENSG00000198938 #or# ENSG00000210164 /// ENSG00000198840 #or# ENSG00000210164	MT-TG	mitochondrially encoded cytochrome c oxidase III #or# mitochondrially encoded tRNA glycine /// mitochondrially encoded NADH:ubiquinone oxidoreductase core subunit 3 #or# mitochondrially encoded tRNA glycine /// mitochondrially encoded tRNA glycine	238.628	963.526	-1.85755	3.86809e-20	19.4125	-2.01356	0	9991	10058						1	0
ENSG00000232238	RPS29P8	ribosomal protein S29 pseudogene 8	61.945	251.889	-1.94776	1.77662e-37	36.7504	-2.02373	2	148595158	148595328	1						0
ENSG00000226361	TERF1P5	telomeric repeat binding factor 1 pseudogene 5	9.40558	38.3284	-1.65666	6.03752e-09	8.21914	-2.02682	13	18680494	18681700	1						0
ENSG00000163082	SGPP2	sphingosine-1-phosphate phosphatase 2	2.79946	11.4158	-1.13579	0.00145302	2.83773	-2.02781	2	222558899	222560948							1
ENSG00000128228	SDF2L1	stromal cell derived factor 2 like 1	502.649	2050.76	-2.01081	1.40434e-197	196.853	-2.02853	22	21642862	21643292							1
ENSG00000242114	MTFP1	mitochondrial fission process 1	16.0119	65.5051	-1.77083	1.32133e-12	11.879	-2.03247	22	30428535	30428951							1
ENSG00000206585	RNVU1-7	RNA, variant U1 small nuclear 7	3.13442	12.9873	-1.20962	0.000491702	3.3083	-2.05083	1	148038753	148038916							1
ENSG00000213363	RPS3P6	ribosomal protein S3 pseudogene 6	402.306	1671.06	-2.03747	1.59862e-158	157.796	-2.0544	12	62021570	62022174	1						0
ENSG00000095370	SH2D3C	SH2 domain containing 3C	6.34943	26.4125	-1.49898	1.81442e-06	5.74126	-2.05652	9	127754842	127755030							1
ENSG00000225405	RPS15AP17	ribosomal protein S15a pseudogene 17	165.49	689.747	-1.94873	6.54158e-29	28.1843	-2.05932	4	62105660	62106049	1						0
ENSG00000213621	RPSAP54	ribosomal protein SA pseudogene 54	163.449	682.858	-2.01971	9.80642e-94	93.0085	-2.06275	13	20961310	20962195	1						0
ENSG00000184545	DUSP8	dual specificity phosphatase 8	26.288	110.237	-1.88427	7.22128e-22	21.1414	-2.06814	11	1557523	1557574							1
ENSG00000257027	AC010186.3	NA	2.73588	11.4861	-1.15663	0.00112736	2.94794	-2.06981	12	9659641	9662085		1					0
ENSG00000177738	AC025171.1	NA	4.47907	18.8741	-1.36048	4.30954e-05	4.36557	-2.07514	5	43014736	43015150		1					0
ENSG00000244422	RPL38P3	ribosomal protein L38 pseudogene 3	751.275	3178.89	-2.06377	1.64702e-240	239.783	-2.08111	4	54976159	54976371	1						0
ENSG00000255387	AC015689.2	NA	4.46689	18.9072	-1.3713	2.68042e-05	4.5718	-2.08159	11	4210354	4212091		1					0
ENSG00000230364	RPL4P3	ribosomal protein L4 pseudogene 3	176.94	752.121	-2.04299	2.18699e-104	103.66	-2.0877	1	171683128	171684438	1						0
ENSG00000230734	RPL10P3	ribosomal protein L10 pseudogene 3	261.631	1114.25	-2.07044	1.1443e-148	147.941	-2.09047	9	117180628	117181095	1						0
ENSG00000226499	AL136380.1	NA	10.8041	46.244	-1.77711	5.68087e-11	10.2456	-2.09768	1	44843921	44844082		1					0
ENSG00000228331	RPL17P43	ribosomal protein L17 pseudogene 43	244.664	1057.13	-2.09502	1.45356e-146	145.838	-2.11127	17	19496943	19497528	1						0
ENSG00000204304	PBX2	PBX homeobox 2	29.2291	127.737	-1.96092	8.68638e-26	25.0612	-2.1277	6	32188280	32188504							1
ENSG00000155660	PDIA4	protein disulfide isomerase family A member 4	1143.91	5020.02	-2.12252	5.28714e-294	293.277	-2.13372	7	149028409	149028468							1
ENSG00000186010	NDUFA13	NADH:ubiquinone oxidoreductase subunit A13	58.8326	263.012	-2.07495	5.91203e-49	48.2283	-2.16044	19	19528007	19528195		1					0
ENSG00000209082 /// ENSG00000209082 #or# ENSG00000210082	MT-TL1	mitochondrially encoded tRNA leucine 1 (UUA/G) #or# mitochondrially encoded 16S RNA /// mitochondrially encoded tRNA leucine 1 (UUA/G)	99.428	445.024	-1.89401	2.69717e-14	13.5691	-2.16216	0	3230	3304						1	0
ENSG00000267939	AC008946.1	NA	3.13925	14.1158	-1.31213	0.000156159	3.80643	-2.16882	19	8015653	8016025		1					0
ENSG00000253945	AC024995.1	NA	434.366	1956.83	-2.14035	5.47527e-147	146.262	-2.17154	8	95403802	95403894		1					0
ENSG00000215450	AL022342.1	NA	9.74304	43.9241	-1.78093	2.66665e-10	9.57403	-2.17257	20	47160838	47161700		1					0
ENSG00000162337	LRP5	LDL receptor related protein 5	36.2533	163.527	-2.02793	6.92807e-32	31.1594	-2.17334	11	68448809	68449182							1
ENSG00000170689	HOXB9	homeobox B9	187.898	850.297	-2.07147	9.87757e-38	37.0054	-2.17802	17	48621159	48622899							1
ENSG00000079337	RAPGEF3	Rap guanine nucleotide exchange factor 3	2.8068	12.7399	-1.2195	0.00050725	3.29478	-2.18236	12	47752562	47752812							1
ENSG00000242060	RPS3AP49	ribosomal protein S3a pseudogene 49	90.4774	410.763	-2.14436	6.86249e-64	63.1635	-2.18268	18	60149576	60150365	1						0
ENSG00000239486	AC091390.3	NA	2.26891	10.4478	-1.16771	0.00115192	2.93858	-2.20313	7	102380465	102380580		1					0
ENSG00000267458	AC092069.1	NA	38.9596	180.053	-1.38757	8.74064e-05	4.05846	-2.20837	19	12944118	12944223		1					0
ENSG00000230837	RPL31P2	ribosomal protein L31 pseudogene 2	979.509	4552.97	-2.19914	0	?	-2.21668	20	33752167	33752543	1						0
ENSG00000238172	RPS2P35	ribosomal protein S2 pseudogene 35	177.83	829.739	-2.18347	5.45828e-131	130.263	-2.22216	9	100116755	100117651	1						0
ENSG00000229965	AL359704.1	NA	2.8043	13.1493	-1.30474	0.000210167	3.67744	-2.22927	1	226438564	226439344		1					0
ENSG00000226558 /// ENSG00000179157 #or# ENSG00000226558	AL590383.1	NA /// ribosomal protein S2 pseudogene 28 #or# NA	3.53779	16.7179	-1.47833	2.69119e-05	4.57006	-2.24047	6	43364220	43364294		1					0
ENSG00000106948	AKNA	AT-hook transcription factor	19.6743	93.964	-2.05482	3.02648e-22	21.5191	-2.25579	9	114359087	114359589							1
ENSG00000063241	ISOC2	isochorismatase domain containing 2	101.645	489.754	-1.9828	1.61174e-16	15.7927	-2.26851	19	55455897	55456489							1
ENSG00000233016 #or# ENSG00000280496 /// ENSG00000233016 /// ENSG00000233016 #or# ENSG00000274998 #or# ENSG00000281808 /// ENSG00000233016 #or# ENSG00000276161 #or# ENSG00000280496	SNHG7	small nucleolar RNA host gene 7 #or# small nucleolar RNA, H/ACA box 17B #or# small nucleolar RNA, H/ACA box 17B /// small nucleolar RNA host gene 7 #or# small nucleolar RNA, H/ACA box 17A #or# NA /// small nucleolar RNA host gene 7 /// small nucleolar RNA host gene 7 #or# small nucleolar RNA, H/ACA box 17B	453.433	2195.17	-2.24695	8.6086e-238	237.065	-2.27537	9	136725234	136727086							1
ENSG00000213741	RPS29	ribosomal protein S29	2162.31	10521.6	-2.25363	1.43994e-154	153.842	-2.28271	14	49597475	49599164							1
ENSG00000051108 #or# ENSG00000261270 /// ENSG00000051108	HERPUD1	homocysteine inducible ER protein with ubiquitin like domain 1 /// homocysteine inducible ER protein with ubiquitin like domain 1 #or# NA	213.759	1042.01	-2.24824	2.8942e-140	139.538	-2.28532	16	56943126	56943407							1
ENSG00000219222	RPL12P47	ribosomal protein L12 pseudogene 47	77.1671	387.106	-2.2663	5.00157e-66	65.3009	-2.32667	6	43310231	43310357	1						0
ENSG00000273416	AL732292.2	NA	2.3325	11.8787	-1.30613	0.000266902	3.57365	-2.34843	1	235104180	235104609		1					0
ENSG00000259488	AC023355.1	NA	1.93396	10.0988	-1.19968	0.000857793	3.06662	-2.38456	15	48330346	48330692		1					0
ENSG00000204228	HSD17B8	hydroxysteroid 17-beta dehydrogenase 8	20.0313	105.793	-2.10776	1.56165e-22	21.8064	-2.40091	6	33206375	33206449							1
ENSG00000207513	RNU1-3	RNA, U1 small nuclear 3	2.79946	14.9258	-1.42382	4.5371e-05	4.34322	-2.41459	1	16666785	16666948							1
ENSG00000225475	AC099789.1	NA	120.215	642.537	-2.34923	2.21538e-101	100.655	-2.41816	1	56619409	56619549		1					0
ENSG00000267757	EML2-AS1	EML2 antisense RNA 1	11.941	66.1367	-2.11268	9.57553e-18	17.0188	-2.46952	19	45642225	45642840							1
ENSG00000242640	RPS29P11	ribosomal protein S29 pseudogene 11	116.179	643.997	-2.41438	1.77521e-108	107.751	-2.47071	4	25678850	25679020	1						0
ENSG00000215464	AP000354.1	NA	4.66983	25.9762	-1.71339	9.62819e-08	7.01646	-2.47575	22	24269346	24269675		1					0
ENSG00000256618	MTRNR2L1	MT-RNR2 like 1	3.87275	21.8109	-1.7172	5.76378e-07	6.23929	-2.49362	17	22524137	22524663							1
ENSG00000234277 #or# ENSG00000242757 /// ENSG00000234277	LINC01641	long intergenic non-protein coding RNA 1641 /// long intergenic non-protein coding RNA 1641 #or# NA	12.7284	72.9124	-2.20328	8.99391e-19	18.0461	-2.51811	1	227425756	227426057			1				0
ENSG00000175197	DDIT3	DNA damage inducible transcript 3	54.1087	320.664	-2.46455	1.31574e-66	65.8808	-2.56713	12	57517476	57517542							1
ENSG00000226338	AC079150.2	NA	3.87525	23.262	-1.69072	2.66076e-07	6.57499	-2.58561	2	153208086	153208163		1					0
ENSG00000159197	KCNE2	potassium voltage-gated channel subfamily E regulatory subunit 2	1.80678	11.1371	-1.30608	0.000265519	3.5759	-2.62388	21	34370851	34371389							1
ENSG00000260109	AC135628.1	NA	2.66745	16.6296	-1.61606	4.9577e-06	5.30472	-2.64022	15	67986027	67986288		1					0
ENSG00000225400	RAB28P5	RAB28, member RAS oncogene family pseudogene 5	2.86305	18.1355	-1.71709	6.38672e-07	6.19472	-2.66319	0	136847384	136848034	1						0
ENSG00000206596	RNU1-27P	RNA, U1 small nuclear 27, pseudogene	3.19801	20.5676	-1.72132	2.5522e-07	6.59309	-2.68513	14	34546714	34546877	1						0
ENSG00000259803	SLC22A31	solute carrier family 22 member 31	13.2857	86.6426	-2.36417	1.39644e-23	22.855	-2.70521	16	89199412	89199655							1
ENSG00000242405	AC007537.2	NA	8.20279	53.567	-2.17416	1.68355e-14	13.7738	-2.70716	12	12155262	12155772		1					0
ENSG00000213760	ATP6V1G2	ATPase H+ transporting V1 subunit G2	1.93396	12.6876	-1.38284	7.49743e-05	4.12509	-2.71379	6	31545756	31546209							1
ENSG00000270916	RPL12P50	ribosomal protein L12 pseudogene 50	1.599	10.5041	-1.3673	0.00017265	3.76283	-2.71571	0	151023607	151023722	1						0
ENSG00000237170	RPS7P15	ribosomal protein S7 pseudogene 15	33.0139	220.998	-2.59874	1.80316e-48	47.744	-2.74289	4	4507249	4507777	1						0
ENSG00000176046	NUPR1	nuclear protein 1, transcriptional regulator	12.7308	85.234	-2.38877	2.16422e-24	23.6647	-2.74311	16	28537537	28537669							1
ENSG00000213979	RPL7AP14	ribosomal protein L7a pseudogene 14	2.00238	13.8922	-1.50866	2.21065e-05	4.65548	-2.79449	20	37444733	37445534	1						0
ENSG00000120068	HOXB8	homeobox B8	15.887	111.356	-2.48683	8.27725e-29	28.0821	-2.80926	17	48613188	48613201							1
ENSG00000240771	ARHGEF25	Rho guanine nucleotide exchange factor 25	11.2711	79.0667	-2.42838	5.33859e-23	22.2726	-2.81044	12	57619311	57619379							1
ENSG00000231434	AL365440.1	NA	148.338	1053.58	-2.78604	5.84698e-157	156.233	-2.82834	1	158523672	158525838		1					0
ENSG00000115274	INO80B	INO80 complex subunit B	4.60624	33.9737	-2.09851	8.27944e-12	11.082	-2.88275	2	74457334	74457540							1
ENSG00000213291	AC010099.1	NA	17.4103	138.721	-2.72882	5.30065e-37	36.2757	-2.99418	7	125300504	125300878		1					0
ENSG00000224236	MRRFP1	mitochondrial ribosome recycling factor pseudogene 1	1.66743	13.6129	-1.61806	5.97229e-06	5.22386	-3.02927	0	123116107	123117781	1						0
ENSG00000141756	FKBP10	FK506 binding protein 10	130.177	1139.3	-2.45469	1.75551e-16	15.7556	-3.1296	17	41822223	41822540							1
ENSG00000131899	LLGL1	LLGL1, scribble cell polarity complex component	17.8772	164.549	-2.91727	1.27324e-44	43.8951	-3.20232	17	18243908	18244875							1
ENSG00000210077 #or# ENSG00000210082 /// ENSG00000210077 #or# ENSG00000211459 /// ENSG00000210077	MT-TV	mitochondrially encoded tRNA valine #or# mitochondrially encoded 16S RNA /// mitochondrially encoded tRNA valine /// mitochondrially encoded tRNA valine #or# mitochondrially encoded 12S RNA	17.3442	177.268	-2.56387	3.25389e-16	15.4876	-3.35341	0	1602	1670						1	0
ENSG00000099958	DERL3	derlin 3	67.9763	725.6	-3.32416	6.88395e-157	156.162	-3.41607	22	23836767	23837154							1
ENSG00000267023	LRRC37A16P	leucine rich repeat containing 37 member A16, pseudogene	10.6648	122.538	-3.04111	2.80492e-38	37.5521	-3.5223	17	68130250	68130322	1						0
ENSG00000174951	FUT1	fucosyltransferase 1 (H blood group)	0.797085	11.0302	-1.57268	1.28664e-05	4.89054	-3.79059	19	48752612	48753122							1
ENSG00000225217	HSPA7	heat shock protein family A (Hsp70) member 7	0.797085	12.2835	-1.81549	5.75882e-07	6.23967	-3.94584	1	161606291	161608217							1
ENSG00000196204 #or# ENSG00000272968	RBAK-RBAKDN	ring finger protein 216 pseudogene 1 #or# RBAK-RBAKDN readthrough	1.26888	21.7029	-2.14027	1.6811e-10	9.77441	-4.09625	7	5072922	5073221							1
ENSG00000177352	CCDC71	coiled-coil domain containing 71	2.66978	108.021	-3.90757	2.48415e-43	42.6048	-5.33845	3	49162535	49162804							1
ENSG00000173110	HSPA6	heat shock protein family A (Hsp70) member 6	4.73593	251.085	-4.83569	6.29073e-73	72.2013	-5.72839	1	161526591	161526910							1
