# Supplementary material for: The role of reciprocal fusions in MLL-r acute leukemia: studying the chromosomal translocation t(6;11)
Source: Oncogene. 2021 Aug 5;40(40):5902–12. doi: 10.1038/s41388-021-01983-3 (PMC8497272; doi:10.1038/s41388-021-01983-3)
Supplement: Supplementary file 6 — MACE-Seq AF6-shMLL [file 41388_2021_1983_MOESM6_ESM.xlsx]

## Sheet: Sheet1
ID	gene symbol	gene name	mean exp	mean mock	log2	pvalue	minus log 10	var-log2	chrom	begin	end	PG	NA	LINC	MIR	SNO	MT	PCG
ENSG00000274705	MIR486-1	microRNA 486-1	60.8603	0.344966	0.709143	0.00232415	2.63374	7.4629	8	41660441	41660508				1			0
ENSG00000283450	MIR486-2	microRNA 486-2	59.6152	0.918157	0.988161	0.000230062	3.63816	6.0208	8	41660444	41660507				1			0
ENSG00000208006	MIR16-1	microRNA 16-1	18.3189	0.288605	0.631557	0	?	5.98809	13	50048973	50049061				1			0
ENSG00000253522 #or# ENSG00000283733	MIR3142HG	MIR3142 host gene #or# microRNA 146a	14.0149	0.228225	0.792416	0.00158103	2.80106	5.94036	5	160485299	160487426				1			0
ENSG00000198987	MIR16-2	microRNA 16-2	16.3776	0.400708	0.590535	0.009027	2.04446	5.35303	3	160404745	160404825				1			0
ENSG00000279123	AC027281.2	NA	85.4914	3.15858	3.86051	2.47561e-35	34.6063	4.75843	16	70778433	70779145		1					0
ENSG00000143226	FCGR2A	Fc fragment of IgG receptor IIa	103.037	3.85253	3.90538	3.13916e-44	43.5032	4.74121	1	161522795	161523099							1
ENSG00000199179	MIRLET7I	microRNA let-7i	16.5442	0.628933	0.53692	0.0136612	1.86451	4.71727	12	62603686	62603769				1			0
ENSG00000199153	MIR30D	microRNA 30d	18.2291	0.745056	1.00343	0.000408945	3.38833	4.61275	8	134804876	134804945				1			0
ENSG00000226380 #or# ENSG00000284032 /// ENSG00000284032	MIR29A	microRNA 29a /// NA #or# microRNA 29a	15.5347	0.684676	0.762232	0.00284425	2.54603	4.50393	7	130876747	130876810				1			0
ENSG00000264066 #or# ENSG00000284565	MIR451A	NA #or# microRNA 451a	50.8346	2.28751	0.855126	0	?	4.47396	17	28861369	28861440				1			0
ENSG00000274536 /// ENSG00000274536 #or# ENSG00000284567	AL034397.3	NA /// NA #or# microRNA 223	13.2826	0.628933	0.749065	0.0221545	1.65454	4.40049	0	66018824	66020422		1					0
ENSG00000129951	PLPPR3	phospholipid phosphatase related 3	11.9052	0.573191	1.82005	2.73645e-07	6.56281	4.37644	19	821560	821955							1
ENSG00000207547	MIR25	microRNA 25	12.7683	0.628933	0.779148	0	?	4.34352	7	100093560	100093643				1			0
ENSG00000199082	MIR342	microRNA 342	10.9	0.801416	0.926511	0.00150623	2.82211	3.76563	14	100109655	100109753				1			0
ENSG00000283016	AL139353.3	NA	17.9011	1.49073	1.97808	7.32338e-11	10.1353	3.58595	14	31320224	31320634		1					0
ENSG00000118058	KMT2A	lysine methyltransferase 2A	2901.84	319.568	3.08559	6.32199e-141	140.199	3.18277	11	118521897	118522409							1
ENSG00000258956	COX4I1P1	cytochrome c oxidase subunit 4I1 pseudogene 1	15.0755	1.89144	1.73872	3.07549e-08	7.51209	2.99465	14	61831861	61832369	1						0
ENSG00000272888 #or# ENSG00000279765 /// ENSG00000279765	AC013394.1	NA /// long intergenic non-protein coding RNA 1578 #or# NA	12.6031	1.77995	1.57638	3.66279e-06	5.43619	2.82386	15	92948952	92949230		1					0
ENSG00000258613	RPL21P7	ribosomal protein L21 pseudogene 7	30.6827	4.52855	2.02674	4.82064e-15	14.3169	2.76031	14	65266638	65267008	1						0
ENSG00000240972	MIF	macrophage migration inhibitory factor	600.732	91.8209	2.61901	2.79691e-180	179.553	2.70983	22	23895040	23895227							1
ENSG00000239200	RPL22P20	ribosomal protein L22 pseudogene 20	15.1515	2.34851	1.60614	2.55315e-07	6.59292	2.68964	14	18692032	18692408	1						0
ENSG00000233080	LINC01399	long intergenic non-protein coding RNA 1399	21.3252	3.78813	1.69529	2.18706e-08	7.66014	2.493	22	35194699	35194942			1				0
ENSG00000176340 #or# ENSG00000256100	AP000721.1	cytochrome c oxidase subunit 8A #or# NA	196.49	37.2323	2.21776	1.02019e-60	59.9913	2.39983	11	63988344	63988346		1					0
ENSG00000234559	RPL22P7	ribosomal protein L22 pseudogene 7	18.6117	3.62369	1.62487	3.55453e-08	7.44922	2.36068	2	129939848	129940217	1						0
ENSG00000220924	OSTCP4	oligosaccharyltransferase complex subunit pseudogene 4	11.193	2.18468	1.33537	0.000156356	3.80589	2.35711	4	112685055	112685503	1						0
ENSG00000230897	RPS18P12	ribosomal protein S18 pseudogene 12	619.493	124.571	2.19744	9.32582e-57	56.0303	2.31412	17	14705076	14705534	1						0
ENSG00000231300	EZH2P1	enhancer of zeste 2 polycomb repressive complex 2 subunit pseudogene 1	16.214	3.3868	1.40558	9.57463e-06	5.01888	2.25924	21	35599732	35600022	1						0
ENSG00000213711	PHBP7	prohibitin pseudogene 7	25.3127	5.39962	1.6573	6.74933e-10	9.17074	2.22893	9	85898903	85899716	1						0
ENSG00000213935	RPL22P16	ribosomal protein L22 pseudogene 16	128.796	27.8705	1.68949	2.60683e-08	7.58389	2.20828	7	4865432	4865804	1						0
ENSG00000228168	HNRNPA1P21	heterogeneous nuclear ribonucleoprotein A1 pseudogene 21	13.832	3.03782	1.34955	5.78918e-05	4.23738	2.1869	3	39334979	39335939	1						0
ENSG00000257243	AC020612.1	NA	13.0237	2.92572	1.33377	2.40063e-05	4.61967	2.15428	12	49595148	49595688		1					0
ENSG00000263464	PPIAL4C	peptidylprolyl isomerase A like 4C	22.3106	5.10576	1.58241	1.49381e-08	7.82571	2.12754	1	149584393	149584464							1
ENSG00000235605	AL355472.2	NA	565.357	130.732	1.99119	4.35286e-35	34.3612	2.11255	1	234356704	234357141		1					0
ENSG00000230291	AC078817.1	NA	614.03	144.547	1.9851	1.36995e-41	40.8633	2.08677	12	80102899	80103333		1					0
ENSG00000225616	AL138785.1	NA	628.51	149.504	1.8856	7.52089e-20	19.1237	2.07175	1	28982278	28982608		1					0
ENSG00000224820	BTF3P4	basic transcription factor 3 pseudogene 4	37.0746	8.88925	1.63144	3.61855e-11	10.4415	2.0603	9	72107818	72108312	1						0
ENSG00000217130	AL139100.1	NA	72.9238	17.5577	1.83692	8.64019e-22	21.0635	2.05429	6	34744176	34744673		1					0
ENSG00000229487	ALG13-AS1	ALG13 antisense RNA 1	10.0378	2.42156	1.10591	0.00268193	2.57155	2.05143	0	111706649	111706737							1
ENSG00000271072	PHBP20	prohibitin pseudogene 20	12.362	2.98671	1.2205	0.000170984	3.76704	2.04928	15	72450657	72451474	1						0
ENSG00000241081	RPL22P2	ribosomal protein L22 pseudogene 2	69.9934	16.9978	1.82188	2.05925e-20	19.6863	2.04187	14	76886377	76886750	1						0
ENSG00000243777	AP000942.1	NA	47.3158	11.7029	1.65034	2.15204e-14	13.6671	2.01546	11	102295060	102295806		1					0
ENSG00000268074	RPL22P5	ribosomal protein L22 pseudogene 5	14.8391	3.67479	1.32843	1.34005e-05	4.87288	2.01367	1	143929994	143930382	1						0
ENSG00000207605	MIR191	microRNA 191	18.632	0	0.941125	0.000319209	3.49593	?	3	49020618	49020709				1			0
ENSG00000258982	AL133523.1	NA	10.4415	0	2.02014	1.58373e-08	7.80032	?	14	100207407	100207652		1					0
ENSG00000207827	MIR30A	microRNA 30a	11.3958	0	1.95589	2.78874e-08	7.55459	?	6	71403551	71403621				1			0
ENSG00000204389	HSPA1A	heat shock protein family A (Hsp70) member 1A	3.95611	27.689	-1.89722	9.42795e-11	10.0256	-2.80716	6	31817683	31817946							1
ENSG00000176840	MIR7-3HG	MIR7-3 host gene	2.38186	17.2065	-1.23208	0.000453825	3.34311	-2.85279	19	4772132	4772514				1			0
ENSG00000166592	RRAD	RRAD, Ras related glycolysis inhibitor and calcium channel regulator	0.787532	10.9302	-1.44937	2.23121e-05	4.65146	-3.79484	16	66921832	66921990							1
ENSG00000225217	HSPA7	heat shock protein family A (Hsp70) member 7	0.311647	12.2835	-2.03919	2.11258e-08	7.67519	-5.30066	1	161606291	161608217							1
ENSG00000173110	HSPA6	heat shock protein family A (Hsp70) member 6	1.72247	251.085	-5.47154	7.88984e-86	85.1029	-7.18755	1	161526591	161526910							1
