# Supplementary material for: The role of reciprocal fusions in MLL-r acute leukemia: studying the chromosomal translocation t(6;11)
Source: Oncogene. 2021 Aug 5;40(40):5902–12. doi: 10.1038/s41388-021-01983-3 (PMC8497272; doi:10.1038/s41388-021-01983-3)
Supplement: Supplementary file 7 — MACE-Seq exMLL-AF6/AF6-shMLL [file 41388_2021_1983_MOESM7_ESM.xlsx]

## Sheet: Sheet1
ID	gene symbol	gene name	mean exp	mean mock	log2	pvalue	minus log 10	var-log2	chrom	begin	end	PG	NA	LINC	MIR	SNO	MT	PCG
ENSG00000122862	SRGN	serglycin	620.559	1.02964	6.68742	2.12109e-140	139.673	9.23528	10	69104121	69104811							1
ENSG00000090382	LYZ	lysozyme	284.508	0.689313	5.76286	7.62257e-90	89.1179	8.68909	12	69350287	69350506							1
ENSG00000162511	LAPTM5	lysosomal protein transmembrane 5	109.177	0.400708	4.78113	1.92143e-57	56.7164	8.0899	1	30741689	30742549							1
ENSG00000136286	MYO1G	myosin IG	46.1629	0.172483	3.68749	1.0012e-27	26.9995	8.06414	7	44968523	44969483							1
ENSG00000187653	TMSB4XP8	TMSB4X pseudogene 8	74.82	0.344966	4.32834	1.12686e-45	44.9481	7.76083	4	90838903	90839037	1						0
ENSG00000019582	CD74	CD74 molecule	208.712	1.14638	5.26358	3.95722e-76	75.4026	7.50828	5	150406705	150406960							1
ENSG00000197061	HIST1H4C	histone cluster 1 H4 family member c	5519.42	30.5435	6.92031	2.74506e-307	306.561	7.49751	6	26104260	26104310							1
ENSG00000115956	PLEK	pleckstrin	30.0518	0.172483	3.24594	1.01328e-20	19.9943	7.44485	2	68395680	68395717							1
ENSG00000196415	PRTN3	proteinase 3	107.073	0.628933	4.59451	1.82159e-51	50.7395	7.41147	19	847970	848175							1
ENSG00000261371	PECAM1	platelet and endothelial cell adhesion molecule 1	42.8466	0.288605	3.70803	5.48472e-29	28.2608	7.21394	17	64377574	64378117							1
ENSG00000132965	ALOX5AP	arachidonate 5-lipoxygenase activating protein	32.2354	0.228225	3.31928	6.03065e-22	21.2196	7.14204	13	30744060	30744396							1
ENSG00000237632	S100A11P1	S100 calcium binding protein A11 pseudogene 1	19.8481	0.172483	2.69018	1.64393e-14	13.7841	6.8464	7	103262000	103262311	1						0
ENSG00000240776	AC079944.1	NA	65.5629	0.573191	4.02432	1.07806e-39	38.9674	6.83772	3	113850237	113850731		1					0
ENSG00000005844	ITGAL	integrin subunit alpha L	42.0962	0.400708	3.53688	1.46179e-26	25.8351	6.71499	16	30521492	30522243							1
ENSG00000073737	DHRS9	dehydrogenase/reductase 9	40.4719	0.400708	3.5582	5.6361e-26	25.249	6.65823	2	169095768	169096167							1
ENSG00000204287	HLA-DRA	major histocompatibility complex, class II, DR alpha	173.422	1.71957	3.91682	5.09663e-30	29.2927	6.6561	6	32444652	32445046							1
ENSG00000136167	LCP1	lymphocyte cytosolic protein 1	186.431	1.95182	4.97969	6.70003e-74	73.1739	6.57768	13	46159016	46159686							1
ENSG00000130592	LSP1	lymphocyte-specific protein 1	50.4582	0.57721	3.66167	9.09708e-28	27.0411	6.44985	11	1887237	1887345							1
ENSG00000160255	ITGB2	integrin subunit beta 2	73.7227	0.977918	4.07745	7.49863e-40	39.125	6.23625	21	44910321	44910785							1
ENSG00000220614	AL583834.1	NA	68.1196	0.917538	4.0332	1.23304e-41	40.909	6.21416	6	43328134	43328476		1					0
ENSG00000197471	SPN	sialophorin	21.4117	0.288605	2.83593	2.00488e-15	14.6979	6.21316	16	29668442	29670518							1
ENSG00000179611	DGKZP1	diacylglycerol kinase zeta pseudogene 1	16.3821	0.228225	2.44482	1.55363e-11	10.8087	6.16552	13	43968424	43971199	1						0
ENSG00000134802	SLC43A3	solute carrier family 43 member 3	27.9856	0.400708	2.99198	1.30141e-17	16.8856	6.12599	11	57426173	57426352							1
ENSG00000219391	AC019129.1	NA	15.5073	0.228225	2.37444	6.49357e-11	10.1875	6.08635	2	44065894	44066154		1					0
ENSG00000118058	KMT2A	lysine methyltransferase 2A	20485.9	319.568	5.83493	0	?	6.00236	11	118521897	118522409							1
ENSG00000123338	NCKAP1L	NCK associated protein 1 like	43.1582	0.689313	3.48448	1.09469e-25	24.9607	5.96833	12	54536129	54536552							1
ENSG00000156970 #or# ENSG00000259288	BUB1B-PAK6	BUB1 mitotic checkpoint serine/threonine kinase B #or# BUB1B-PAK6 readthrough	10.5536	0.172483	1.91797	1.70206e-07	6.76903	5.93514	15	40264781	40264890							1
ENSG00000214318	ATP5MC1P6	ATP synthase membrane subunit c locus 1 pseudogene 6	31.5506	0.51683	3.18498	1.18993e-21	20.9245	5.93183	18	63496989	63497400	1						0
ENSG00000197253	TPSB2	tryptase beta 2 (gene/pseudogene)	34.3582	0.573191	3.26	1.42115e-22	21.8474	5.90549	16	1228337	1228649	1						0
ENSG00000197989 #or# ENSG00000278274	SNORA61	small nucleolar RNA host gene 12 #or# small nucleolar RNA, H/ACA box 61	21.6787	0.400708	2.63035	9.80455e-14	13.0086	5.75758	1	28579764	28579893					1		0
ENSG00000081237	PTPRC	protein tyrosine phosphatase, receptor type C	14.7195	0.288605	2.2745	4.90624e-10	9.30925	5.67248	1	198754269	198754457							1
ENSG00000093072	ADA2	adenosine deaminase 2	20.4074	0.400708	2.61527	3.83291e-13	12.4165	5.6704	22	17209678	17209723							1
ENSG00000142185	TRPM2	transient receptor potential cation channel subfamily M member 2	14.3351	0.288605	2.28276	4.58786e-10	9.33839	5.63432	21	44441692	44441874							1
ENSG00000283016	AL139353.3	NA	71.7647	1.49073	3.79426	7.38721e-40	39.1315	5.58918	14	31320224	31320634		1					0
ENSG00000084110	HAL	histidine ammonia-lyase	18.4595	0.400708	2.55503	9.02865e-13	12.0444	5.52567	12	95994977	95995200							1
ENSG00000104903	LYL1	LYL1, basic helix-loop-helix family member	12.6421	0.288605	2.10809	8.78767e-09	8.05613	5.453	19	13101178	13102724							1
ENSG00000106006 /// ENSG00000106006 #or# ENSG00000272801	HOXA6	homeobox A6 /// homeobox A6 #or# NA	76.3339	1.89206	3.82998	9.7912e-39	38.0092	5.3343	7	27145662	27145917							1
ENSG00000180353	HCLS1	hematopoietic cell-specific Lyn substrate 1	35.6669	0.922176	3.13553	4.09243e-21	20.388	5.2734	3	121657982	121658347							1
ENSG00000169896	ITGAM	integrin subunit alpha M	16.907	0.461088	2.43957	1.77607e-11	10.7505	5.19644	16	31331375	31331536							1
ENSG00000101361 #or# ENSG00000212498	SNORD86	NOP56 ribonucleoprotein #or# small nucleolar RNA, C/D box 86	28.7279	0.806054	2.96007	9.71307e-19	18.0126	5.15543	20	2656097	2656182					1		0
ENSG00000128340	RAC2	Rac family small GTPase 2	89.5345	2.52563	3.83471	1.15249e-40	39.9384	5.14773	22	37240805	37241012							1
ENSG00000118785	SPP1	secreted phosphoprotein 1	15.8916	0.461088	2.34725	1.32597e-10	9.87747	5.10708	4	87980046	87980188							1
ENSG00000111321	LTBR	lymphotoxin beta receptor	13.7951	0.400708	2.20153	1.46106e-09	8.83533	5.10546	12	6390660	6391571							1
ENSG00000258802	AL139317.2	NA	289.995	8.43033	4.62146	7.35241e-116	115.134	5.1043	14	52798904	52799061		1					0
ENSG00000248522	SBF1P1	SET binding factor 1 pseudogene 1	11.478	0.344966	1.90026	2.30495e-07	6.63734	5.05628	8	55449509	55455139	1						0
ENSG00000147206	NXF3	nuclear RNA export factor 3	19.0946	0.57721	2.50559	4.16575e-12	11.3803	5.04793	0	103082096	103082364							1
ENSG00000143851	PTPN7	protein tyrosine phosphatase, non-receptor type 7	24.7897	0.749693	2.78068	1.34785e-15	14.8704	5.04729	1	202158458	202159454							1
ENSG00000110876	SELPLG	selectin P ligand	22.4049	0.689313	2.66578	6.00233e-14	13.2217	5.02251	12	108622829	108623068							1
ENSG00000129951	PLPPR3	phospholipid phosphatase related 3	18.4817	0.573191	2.28551	1.08406e-10	9.96495	5.01094	19	821560	821955							1
ENSG00000197956	S100A6	S100 calcium binding protein A6	23.3747	0.745056	2.77956	3.64885e-15	14.4378	4.97146	1	153535093	153535360							1
ENSG00000076242	MLH1	mutL homolog 1	12.4368	0.400708	2.01555	4.12468e-08	7.38461	4.95592	3	37050486	37050537							1
ENSG00000182676	PPP1R27	protein phosphatase 1 regulatory subunit 27	41.4459	1.37863	3.25308	4.39782e-23	22.3568	4.90992	17	81833498	81834498							1
ENSG00000166825	ANPEP	alanyl aminopeptidase, membrane	17.2266	0.57721	2.42077	2.20141e-11	10.6573	4.8994	15	89806584	89806945							1
ENSG00000166428	PLD4	phospholipase D family member 4	17.9761	0.633571	2.38812	1.81184e-11	10.7419	4.82643	14	104932965	104933235							1
ENSG00000217824	SNRPEP6	small nuclear ribonucleoprotein polypeptide E pseudogene 6	22.8235	0.805435	2.70722	3.21778e-15	14.4924	4.82461	6	148567378	148567654	1						0
ENSG00000251593	MSNP1	moesin pseudogene 1	11.1584	0.400708	1.8921	2.65853e-07	6.57536	4.79944	5	25909503	25911234	1						0
ENSG00000210191 /// ENSG00000210184 #or# ENSG00000210191 /// ENSG00000198786 #or# ENSG00000210191 /// ENSG00000210176 #or# ENSG00000210184 #or# ENSG00000210191	MT-TL2	mitochondrially encoded tRNA histidine #or# mitochondrially encoded tRNA serine 2 (AGU/C) #or# mitochondrially encoded tRNA leucine 2 (CUN) /// mitochondrially encoded NADH:ubiquinone oxidoreductase core subunit 5 #or# mitochondrially encoded tRNA leucine 2 (CUN) /// mitochondrially encoded tRNA serine 2 (AGU/C) #or# mitochondrially encoded tRNA leucine 2 (CUN) /// mitochondrially encoded tRNA le…	44.2089	1.60685	3.23648	5.70007e-25	24.2441	4.78203	0	12266	12336						1	0
ENSG00000232486	AL592437.2	NA	15.6974	0.573191	2.22275	1.07686e-09	8.96784	4.77537	9	105758370	105760755		1					0
ENSG00000269576 #or# ENSG00000275862	HNRNPMP2	heterogeneous nuclear ribonucleoprotein M pseudogene 2 #or# NA	22.9186	0.861796	2.63867	2.99999e-14	13.5229	4.73303	19	46809585	46810183	1						0
ENSG00000145287	PLAC8	placenta specific 8	112.438	4.36936	3.84091	2.25081e-48	47.6477	4.68556	4	83092861	83094686							1
ENSG00000169442	CD52	CD52 molecule	14.6396	0.573191	2.16244	2.54269e-09	8.59471	4.67471	1	26320171	26320324							1
ENSG00000243678	NME2	NME/NM23 nucleoside diphosphate kinase 2	69.3828	2.75323	3.51701	1.33369e-36	35.8749	4.65538	17	51171487	51171608							1
ENSG00000258682	AL132989.1	NA	14.2289	0.573191	2.09023	1.2158e-08	7.91514	4.63367	14	58269561	58269681		1					0
ENSG00000010610	CD4	CD4 molecule	28.7087	1.20676	2.79115	1.19174e-16	15.9238	4.57228	12	6814759	6814842							1
ENSG00000213492	NT5C3AP1	5'-nucleotidase, cytosolic IIIA pseudogene 1	12.0413	0.51683	1.98379	3.83747e-08	7.41595	4.54216	4	117575098	117576109	1						0
ENSG00000226138	AC004801.1	NA	19.8289	0.861796	2.32357	1.91286e-11	10.7183	4.52411	12	48085062	48085421		1					0
ENSG00000198520	ARMH1	armadillo-like helical domain containing 1	29.8728	1.32288	2.83586	3.40768e-17	16.4675	4.49707	1	44725291	44725591							1
ENSG00000156966	B3GNT7	UDP-GlcNAc:betaGal beta-1,3-N-acetylglucosaminyltransferase 7	11.6378	0.51683	1.93549	1.40411e-07	6.8526	4.49299	2	231397731	231398257							1
ENSG00000258613	RPL21P7	ribosomal protein L21 pseudogene 7	100.687	4.52855	3.60784	6.83427e-49	48.1653	4.47468	14	65266638	65267008	1						0
ENSG00000134516	DOCK2	dedicator of cytokinesis 2	30.5048	1.37399	2.86818	9.80208e-18	17.0087	4.47259	5	170082796	170083377							1
ENSG00000228002	DHX9P1	DEAH-box helicase 9 pseudogene 1	13.9397	0.628933	2.1042	6.98314e-09	8.15595	4.47015	13	76984868	76987943	1						0
ENSG00000249176	AC027801.2	NA	11.1928	0.51683	1.85479	4.21353e-07	6.37535	4.43674	17	49939122	49939819		1					0
ENSG00000210100	MT-TI	mitochondrially encoded tRNA isoleucine	53.1413	2.47328	1.87439	3.66433e-07	6.43601	4.42533	0	4263	4331						1	0
ENSG00000204264	PSMB8	proteasome subunit beta 8	20.4792	0.973899	2.38757	1.45439e-11	10.8373	4.39424	6	32841021	32841047							1
ENSG00000240972	MIF	macrophage migration inhibitory factor	1850.61	91.8209	4.23515	0	?	4.33304	22	23895040	23895227							1
ENSG00000162645	GBP2	guanylate binding protein 2	10.3291	0.51683	1.76687	1.51952e-06	5.81829	4.32088	1	89110187	89110266							1
ENSG00000235787	AC092047.1	NA	71.0991	3.55867	3.41944	6.70519e-36	35.1736	4.32042	3	42469640	42469879		1					0
ENSG00000243538	RPS26P28	ribosomal protein S26 pseudogene 28	302.943	15.6564	3.95687	2.13756e-113	112.67	4.27423	5	16902294	16902641	1						0
ENSG00000104894	CD37	CD37 molecule	25.3833	1.32288	2.6111	2.13047e-14	13.6715	4.26212	19	49343283	49343335							1
ENSG00000100060	MFNG	MFNG O-fucosylpeptide 3-beta-N-acetylglucosaminyltransferase	13.2358	0.689931	1.94662	1.05081e-07	6.97848	4.26184	22	37486178	37486393							1
ENSG00000066336	SPI1	Spi-1 proto-oncogene	43.3898	2.29678	2.95041	7.13353e-20	19.1467	4.23967	11	47358181	47358598							1
ENSG00000258956	COX4I1P1	cytochrome c oxidase subunit 4I1 pseudogene 1	35.6447	1.89144	2.82467	1.97021e-20	19.7055	4.23613	14	61831861	61832369	1						0
ENSG00000239200	RPL22P20	ribosomal protein L22 pseudogene 20	44.2312	2.34851	2.94584	7.72324e-23	22.1122	4.23525	14	18692032	18692408	1						0
ENSG00000181359	HSP90AA6P	heat shock protein 90 alpha family class A member 6, pseudogene	13.97	0.749693	2.0832	1.18723e-08	7.92546	4.21989	4	170604716	170605450	1						0
ENSG00000111679	PTPN6	protein tyrosine phosphatase, non-receptor type 6	34.6889	1.89082	2.82883	1.52666e-17	16.8163	4.19739	12	6961126	6961316							1
ENSG00000242041	RPL35AP28	ribosomal protein L35a pseudogene 28	674.718	37.3834	3.58219	2.69081e-48	47.5701	4.17381	12	49863173	49863503	1						0
ENSG00000210107	MT-TQ	mitochondrially encoded tRNA glutamine	27.5637	1.54709	2.54509	7.33867e-14	13.1344	4.15514	0	4329	4400						1	0
ENSG00000247982	LINC00926	long intergenic non-protein coding RNA 926	45.1242	2.53366	2.25501	5.63338e-10	9.24923	4.15461	15	57306300	57307769			1				0
ENSG00000237064	EIF3IP1	eukaryotic translation initiation factor 3 subunit I pseudogene 1	32.833	1.8868	2.73998	6.93677e-18	17.1588	4.12113	7	109959218	109960184	1						0
ENSG00000240489	SETP14	SET pseudogene 14	28.7087	1.66785	2.65716	1.98249e-15	14.7028	4.10543	3	155987304	155988176	1						0
ENSG00000261461	UBE2MP1	ubiquitin conjugating enzyme E2 M pseudogene 1	23.9381	1.43901	2.50445	4.71617e-14	13.3264	4.05616	16	35169692	35170241	1						0
ENSG00000176340 #or# ENSG00000256100	AP000721.1	cytochrome c oxidase subunit 8A #or# NA	618.206	37.2323	3.85115	1.30556e-196	195.884	4.05346	11	63988344	63988346		1					0
ENSG00000234213	FHP1	fumarate hydratase pseudogene 1	19.034	1.14638	2.23822	6.81103e-11	10.1668	4.05342	13	42255873	42256575	1						0
ENSG00000233503	HNRNPLP1	heterogeneous nuclear ribonucleoprotein L pseudogene 1	16.9718	1.02964	2.20166	3.51169e-10	9.45448	4.04292	6	7481094	7482594	1						0
ENSG00000282879	AC095038.3	NA	50.8435	3.0982	3.04898	2.10355e-25	24.677	4.03656	7	56736396	56736590		1					0
ENSG00000206341	HLA-H	major histocompatibility complex, class I, H (pseudogene)	29.0778	1.7747	2.67813	3.35968e-16	15.4737	4.03427	6	29890439	29890482	1						0
ENSG00000026508	CD44	CD44 molecule (Indian blood group)	64.7336	3.95938	3.25477	3.56908e-31	30.4474	4.03117	11	35229334	35229789							1
ENSG00000215088	RPS5P3	ribosomal protein S5 pseudogene 3	15.8421	0.977918	2.17698	8.59431e-10	9.06579	4.0179	21	33481580	33482195	1						0
ENSG00000230897	RPS18P12	ribosomal protein S18 pseudogene 12	1998.45	124.571	3.83623	1.08304e-173	172.965	4.00384	17	14705076	14705534	1						0
ENSG00000185811	IKZF1	IKAROS family zinc finger 1	21.9902	1.37399	2.4277	3.08292e-12	11.511	4.00042	7	50369522	50369704							1
ENSG00000234559	RPL22P7	ribosomal protein L22 pseudogene 7	57.1171	3.62369	3.07909	6.56647e-28	27.1827	3.97839	2	129939848	129940217	1						0
ENSG00000244405 /// ENSG00000058866 #or# ENSG00000244405	ETV5	ETS variant 5 /// diacylglycerol kinase gamma #or# ETS variant 5	17.2499	1.09466	2.2162	6.1564e-10	9.21067	3.97803	3	186105410	186105496							1
ENSG00000275110	MIR6087	microRNA 6087	168.639	10.7423	3.59334	7.52839e-69	68.1233	3.97257	0	109054542	109054590				1			0
ENSG00000237972	TUBG1P	tubulin gamma 1 pseudogene	24.6187	1.60747	2.44961	1.47786e-13	12.8304	3.93689	7	43918697	43920054	1						0
ENSG00000225483	RPL22P4	ribosomal protein L22 pseudogene 4	63.7982	4.17895	3.05963	3.60714e-29	28.4428	3.9323	1	206160887	206161276	1						0
ENSG00000213539	YBX1P6	Y-box binding protein 1 pseudogene 6	55.9336	3.68345	3.05505	3.06148e-24	23.5141	3.92459	9	109532830	109532943	1						0
ENSG00000231991	ANXA2P2	annexin A2 pseudogene 2	49.6258	3.2713	2.88826	1.78244e-24	23.749	3.92315	9	33624274	33625293	1						0
ENSG00000261519	AC010542.4	NA	10.3979	0.689313	1.75172	1.88725e-06	5.72417	3.91498	16	66549280	66551189		1					0
ENSG00000270230	MTND6P22	mitochondrially encoded NADH:ubiquinone oxidoreductase core subunit 6 pseudogene 22	30.075	2.00756	2.61035	4.34572e-15	14.3619	3.90505	5	100046450	100046970	1						0
ENSG00000248966	BCLAF1P1	BCL2 associated transcription factor 1 pseudogene 1	15.4577	1.03428	2.09133	4.15962e-09	8.38095	3.90163	5	110948029	110950780	1						0
ENSG00000123329	ARHGAP9	Rho GTPase activating protein 9	10.1845	0.689313	1.72251	2.77108e-06	5.55735	3.88507	12	57479161	57479165							1
ENSG00000210135 /// ENSG00000210135 #or# ENSG00000210140 /// ENSG00000210127 #or# ENSG00000210135	MT-TN	mitochondrially encoded tRNA asparagine #or# mitochondrially encoded tRNA cysteine /// mitochondrially encoded tRNA alanine #or# mitochondrially encoded tRNA asparagine /// mitochondrially encoded tRNA asparagine	542.757	37.2873	3.11301	6.99007e-28	27.1555	3.86355	0	5657	5729						1	0
ENSG00000105583 #or# ENSG00000269590	AC010422.5	WD repeat domain 83 opposite strand #or# NA	18.2694	1.2625	2.15938	5.26859e-10	9.27831	3.85507	19	12664828	12664985		1					0
ENSG00000168298	HIST1H1E	histone cluster 1 H1 family member e	46.35	3.22298	2.85489	3.41662e-19	18.4664	3.8461	6	26157051	26157107							1
as__ENSG00000251562 #or# as__ENSG00000278217 /// ENSG00000251562 #or# ENSG00000274072 /// ENSG00000251562 #or# ENSG00000278217 /// ENSG00000251562	MALAT1	metastasis associated lung adenocarcinoma transcript 1 (non-protein coding) /// metastasis associated lung adenocarcinoma transcript 1 (non-protein coding) #or# NA	1185	83.5756	3.34403	8.75965e-43	42.0575	3.82566	11	65506386	65506516							1
ENSG00000249129	SUDS3P1	SDS3 homolog, SIN3A corepressor complex component pseudogene 1	16.9799	1.20738	2.01141	2.8469e-08	7.54563	3.81387	5	177971316	177972281	1						0
ENSG00000115541 #or# ENSG00000270757 /// ENSG00000115540 #or# ENSG00000270757	HSPE1-MOB4	heat shock protein family E (Hsp10) member 1 #or# HSPE1-MOB4 readthrough /// MOB family member 4, phocein #or# HSPE1-MOB4 readthrough	566.7	40.8033	3.68398	1.67407e-188	187.776	3.79583	2	197550647	197550726							1
ENSG00000239600	AP000797.1	NA	17.3864	1.2625	2.07834	3.57018e-09	8.44731	3.7836	11	115951105	115951491		1					0
ENSG00000269900 /// ENSG00000269900 #or# ENSG00000277027	RMRP	RNA component of mitochondrial RNA processing endoribonuclease #or# RNA component of mitochondrial RNA processing endoribonuclease /// RNA component of mitochondrial RNA processing endoribonuclease	22.8882	1.67187	2.37868	7.82194e-12	11.1067	3.77507	9	35657751	35658018							1
ENSG00000105383	CD33	CD33 molecule	10.938	0.801416	1.71922	2.95617e-06	5.52927	3.77065	19	51239518	51240015							1
ENSG00000200488	RN7SKP203	RNA, 7SK small nuclear pseudogene 203	17.976	1.3235	2.09964	6.66725e-09	8.17605	3.76364	2	76445079	76445410	1						0
ENSG00000240912	AC092896.1	NA	10.8277	0.801416	1.70766	2.52393e-06	5.59792	3.75603	3	114103249	114103628		1					0
ENSG00000240477	AC022494.1	NA	22.1004	1.66321	2.26353	6.6554e-11	10.1768	3.73203	3	150050729	150051456		1					0
ENSG00000253173	H2AFZP2	H2A histone family member Z pseudogene 2	47.9863	3.61905	2.88609	3.16579e-24	23.4995	3.72894	8	70103798	70104179	1						0
ENSG00000118513	MYB	MYB proto-oncogene, transcription factor	79.7191	6.02392	3.04252	4.41439e-30	29.3551	3.72615	6	135203716	135203950							1
ENSG00000264229	RNU4ATAC	RNA, U4atac small nuclear (U12-dependent splicing)	171.357	12.9904	2.05323	1.93016e-08	7.71441	3.72149	2	121530881	121531007							1
ENSG00000028137	TNFRSF1B	TNF receptor superfamily member 1B	17.1882	1.32288	2.01641	2.97134e-08	7.52705	3.69966	1	12192863	12193008							1
ENSG00000215007	DNAJA1P3	DnaJ heat shock protein family (Hsp40) member A1 pseudogene 3	34.0203	2.63711	2.56928	7.88748e-16	15.1031	3.68937	0	107351650	107352843	1						0
ENSG00000224861	YBX1P1	Y-box binding protein 1 pseudogene 1	310.335	24.2532	3.30719	3.45562e-49	48.4615	3.67758	14	66012830	66013789	1						0
ENSG00000259078	PTBP1P	polypyrimidine tract binding protein 1 pseudogene	13.1862	1.03428	1.87853	2.20783e-07	6.65603	3.67233	14	65280621	65281166	1						0
ENSG00000149781	FERMT3	fermitin family member 3	17.5078	1.37399	2.01851	2.23688e-08	7.65036	3.67156	11	64223048	64223120							1
ENSG00000213763	ACTBP2	actin, beta pseudogene 2	29.1425	2.3008	2.55527	1.25812e-15	14.9003	3.66292	5	77784881	77786003	1						0
ENSG00000259394	AC079328.1	NA	17.4552	1.37863	2.15195	1.37039e-09	8.86316	3.66235	15	62953173	62954124		1					0
ENSG00000213452	AKR1B1P2	aldo-keto reductase family 1 member B1 pseudogene 2	31.5436	2.52099	2.46505	6.22211e-15	14.2061	3.64528	3	74135959	74136892	1						0
ENSG00000231480	SNRPGP13	small nuclear ribonucleoprotein polypeptide G pseudogene 13	16.4964	1.32227	2.13744	1.8002e-09	8.74468	3.64107	21	38502445	38502621	1						0
ENSG00000250568	AC098591.2	NA	84.6089	6.78226	3.10428	1.6189e-35	34.7908	3.64097	4	39973128	39973442		1					0
ENSG00000236646	LAMTOR5P1	late endosomal/lysosomal adaptor, MAPK and MTOR activator 5 pseudogene 1	30.436	2.46865	2.50773	8.09173e-15	14.092	3.62399	1	62038842	62039111	1						0
ENSG00000268993	RPL22P6	ribosomal protein L22 pseudogene 6	58.3954	4.76605	2.87138	7.80022e-27	26.1079	3.61499	1	121142051	121142438	1						0
ENSG00000223861	AL365436.1	NA	32.9129	2.70089	2.65896	4.20935e-17	16.3758	3.60715	1	151557446	151557940		1					0
ENSG00000086730	LAT2	linker for activation of T cells family member 2	117.36	9.70613	2.65458	1.51985e-16	15.8182	3.5959	7	74228944	74229072							1
ENSG00000243777	AP000942.1	NA	140.307	11.7029	3.16867	1.58546e-54	53.7998	3.58365	11	102295060	102295806		1					0
ENSG00000267076	CCDC58P3	coiled-coil domain containing 58 pseudogene 3	11.5963	0.973899	1.7269	1.82629e-06	5.73843	3.57375	18	12211378	12211807	1						0
ENSG00000213478	CFL1P2	cofilin 1 pseudogene 2	10.2037	0.861796	1.67173	5.06402e-06	5.2955	3.5656	1	51157788	51158471	1						0
ENSG00000090376 #or# ENSG00000284011 /// ENSG00000090376	IRAK3	interleukin 1 receptor associated kinase 3 #or# microRNA 6502 /// interleukin 1 receptor associated kinase 3	16.2719	1.37863	2.09119	3.35789e-09	8.47393	3.56108	12	66248172	66248373							1
ENSG00000222489	SNORA79B	small nucleolar RNA, H/ACA box 79B	47.9408	4.07674	2.76186	5.44482e-21	20.264	3.55577	14	20323179	20323326					1		0
ENSG00000198695 #or# ENSG00000210194 /// ENSG00000210194	MT-TE	mitochondrially encoded NADH:ubiquinone oxidoreductase core subunit 6 #or# mitochondrially encoded tRNA glutamic acid /// mitochondrially encoded tRNA glutamic acid	846.618	72.5957	3.06559	1.27189e-34	33.8956	3.54376	0	14674	14742						1	0
ENSG00000167895	TMC8	transmembrane channel like 8	11.3182	0.977918	1.77385	1.13154e-06	5.94633	3.53279	17	78140837	78141229							1
ENSG00000229399	AL592148.1	NA	49.0675	4.24396	2.70728	5.05491e-21	20.2963	3.53128	1	222641414	222641858		1					0
ENSG00000214460	TPT1P6	tumor protein, translationally-controlled 1 pseudogene 6	37.908	3.33044	2.61264	8.17882e-18	17.0873	3.50872	6	85427453	85427966	1						0
ENSG00000268074	RPL22P5	ribosomal protein L22 pseudogene 5	41.8271	3.67479	2.66577	6.17428e-20	19.2094	3.50871	1	143929994	143930382	1						0
ENSG00000133169	BEX1	brain expressed X-linked 1	123.357	10.8485	3.09409	8.29375e-43	42.0812	3.50727	0	103062651	103062896							1
ENSG00000249193	HSPD1P5	heat shock protein family D (Hsp60) member 1 pseudogene 5	23.4243	2.06856	2.25609	5.25201e-11	10.2797	3.50131	4	144845625	144847344	1						0
ENSG00000254935	AP002469.1	NA	26.2399	2.35314	2.27494	1.49979e-12	11.824	3.4791	11	122618851	122619274		1					0
ENSG00000103426 #or# ENSG00000262246	CORO7-PAM16	CORO7-PAM16 readthrough #or# coronin 7	16.6714	1.49537	2.02326	1.3064e-08	7.88393	3.4788	16	4340941	4340985							1
ENSG00000232388 #or# ENSG00000284776	AL121900.2	small integral membrane protein 26 #or# NA	98.9147	8.89389	2.94501	4.4429e-38	37.3523	3.4753	20	18567453	18567478		1					0
ENSG00000241478	HSPA8P9	heat shock protein family A (Hsp70) member 8 pseudogene 9	106.751	9.62441	3.04197	3.67755e-42	41.4344	3.4714	3	137880295	137882237	1						0
ENSG00000236574	AC092634.6	NA	13.2398	1.20614	1.85629	3.23427e-07	6.49022	3.45641	7	63843314	63843505		1					0
ENSG00000102879	CORO1A	coronin 1A	101.23	9.25091	3.02736	6.67415e-37	36.1756	3.4519	16	30188361	30188572							1
ENSG00000230171	RPL22P18	ribosomal protein L22 pseudogene 18	41.2527	3.78349	2.5539	1.43858e-18	17.8421	3.4467	10	80125941	80126317	1						0
ENSG00000244527	AC022795.1	NA	71.0152	6.54878	2.90607	5.93288e-31	30.2267	3.43883	18	21119182	21119661		1					0
ENSG00000241255	AL136126.1	NA	491.411	45.3424	3.32059	2.41725e-153	152.617	3.438	11	33237008	33237409		1					0
ENSG00000235354	RPS29P16	ribosomal protein S29 pseudogene 16	4308.19	398.973	3.29135	8.31497e-114	113.08	3.43272	7	103348601	103348771	1						0
ENSG00000213711	PHBP7	prohibitin pseudogene 7	58.186	5.39962	2.73672	5.51714e-26	25.2583	3.42974	9	85898903	85899716	1						0
ENSG00000184730	APOBR	apolipoprotein B receptor	15.3091	1.43035	1.9097	1.05695e-07	6.97594	3.41995	16	28498506	28498970							1
ENSG00000225536	STIP1P3	stress induced phosphoprotein 1 pseudogene 3	22.1691	2.07258	2.22099	8.78455e-11	10.0563	3.41906	0	86084716	86086339	1						0
ENSG00000249799	SNRPCP13	small nuclear ribonucleoprotein polypeptide C pseudogene 13	10.413	0.973899	1.59518	1.33779e-05	4.87361	3.41847	4	9583942	9584131	1						0
ENSG00000165140	FBP1	fructose-bisphosphatase 1	11.033	1.03428	1.65224	6.95418e-06	5.15775	3.41513	9	94620410	94620491							1
ENSG00000214009	PCNAP3	proliferating cell nuclear antigen pseudogene 3	16.5004	1.55049	1.98034	3.60115e-08	7.44356	3.41171	0	46058751	46059528	1						0
ENSG00000259531	AC022306.1	NA	11.5963	1.09002	1.73114	1.93955e-06	5.7123	3.41124	15	49365124	49366685		1					0
ENSG00000235546	AC087499.4	NA	15.2029	1.43035	1.91237	5.66066e-08	7.24713	3.40991	17	20612667	20614008		1					0
ENSG00000225462	FDPSP1	farnesyl diphosphate synthase pseudogene 1	26.1752	2.46927	2.29011	8.16904e-13	12.0878	3.40605	1	187563061	187564131	1						0
ENSG00000231397	AC004941.2	NA	16.3862	1.54647	1.96749	3.37152e-08	7.47217	3.40543	7	149321865	149322092		1					0
ENSG00000279800	BCLAF1P2	BCL2 associated transcription factor 1 pseudogene 2	118.068	11.147	3.03167	3.56326e-41	40.4482	3.40489	16	34266041	34268649	1						0
ENSG00000170540 #or# ENSG00000260342 /// ENSG00000134419 #or# ENSG00000260342	AC138811.2	ribosomal protein S15a #or# NA /// ADP ribosylation factor like GTPase 6 interacting protein 1 #or# NA	2763.07	261.532	3.20439	3.35137e-81	80.4748	3.40121	16	18801467	18801519		1					0
ENSG00000229738	AC010240.1	NA	21.8759	2.07258	2.23643	4.8852e-11	10.3111	3.39984	5	132987652	132988110		1					0
ENSG00000174004	NRROS	negative regulator of reactive oxygen species	11.4821	1.09002	1.74377	1.48662e-06	5.8278	3.39695	3	196654527	196654993							1
ENSG00000256211	AC023512.1	NA	12.631	1.20676	1.77995	6.05445e-07	6.21793	3.38775	12	16989876	16989936		1					0
ENSG00000240882	AC063952.2	NA	18.593	1.78335	2.0838	3.58838e-09	8.4451	3.38209	3	120306726	120307952		1					0
ENSG00000220548	VIM2P	vimentin 2, pseudogene	11.2727	1.09002	1.68689	3.75395e-06	5.42551	3.37041	6	126602356	126603649	1						0
ENSG00000105379 #or# ENSG00000269403	AC008750.8	electron transfer flavoprotein subunit beta #or# NA	32.9929	3.21432	2.44161	1.82315e-15	14.7392	3.35957	19	51350373	51350391		1					0
ENSG00000257243	AC020612.1	NA	29.9264	2.92572	2.35622	1.62767e-14	13.7884	3.35456	12	49595148	49595688		1					0
ENSG00000237631	AL161454.1	NA	25.8212	2.52439	2.28737	2.6244e-12	11.581	3.35455	9	95918136	95918704		1					0
ENSG00000230626	AC011005.1	NA	56.1926	5.51049	2.74475	7.26425e-25	24.1388	3.35013	7	129130749	129130793		1					0
ENSG00000237307	SRRM1P3	serine/arginine repetitive matrix 1 pseudogene 3	43.8165	4.30898	2.61878	2.84295e-19	18.5462	3.34605	0	136976417	136976476	1						0
ENSG00000205662	FAM239C	family with sequence similarity 239 member C (non-protein coding)	19.1786	1.89082	2.08808	1.78936e-09	8.7473	3.34242	0	3929869	3931782							1
ENSG00000250644 /// ENSG00000117984 #or# ENSG00000250644	AC068580.4	NA /// cathepsin D #or# NA	41.0655	4.07612	2.5679	6.47372e-18	17.1888	3.33266	11	1747747	1748119		1					0
ENSG00000235211	TMSB10P2	thymosin beta 10 pseudogene 2	50.9922	5.11101	2.60796	2.85011e-21	20.5451	3.31859	0	18341216	18341346	1						0
ENSG00000218502	H2AFZP3	H2A histone family member Z pseudogene 3	109.684	11.0256	2.93939	2.72664e-41	40.5644	3.31442	13	99215372	99215758	1						0
ENSG00000112297	CRYBG1	crystallin beta-gamma domain containing 1	15.3627	1.55111	1.93243	7.31867e-08	7.13557	3.30806	6	106551852	106552314							1
ENSG00000225487	AL390119.1	NA	377.208	38.2792	3.13257	7.04367e-112	111.152	3.30073	1	164921318	164921629		1					0
ENSG00000103196	CRISPLD2	cysteine rich secretory protein LCCL domain containing 2	14.6395	1.48609	1.83522	3.39558e-07	6.46909	3.30027	16	84920397	84920768							1
ENSG00000213740	SERBP1P1	SERPINE1 mRNA binding protein 1 pseudogene 1	172.371	17.5193	3.04279	1.44144e-58	57.8412	3.29851	0	68784224	68785066	1						0
ENSG00000267920	SNX6P1	sorting nexin 6 pseudogene 1	13.5098	1.37461	1.71186	2.14746e-06	5.66808	3.29692	19	23126569	23127792	1						0
ENSG00000183048 #or# ENSG00000262660	AC139530.2	solute carrier family 25 member 10 #or# NA	13.4795	1.37461	1.75508	8.89207e-07	6.051	3.29367	17	81720078	81720539		1					0
ENSG00000234176	HSPA8P1	heat shock protein family A (Hsp70) member 8 pseudogene 1	68.4625	7.00245	2.72889	1.04035e-26	25.9828	3.28938	0	121203182	121205014	1						0
ENSG00000261395	HSPE1P5	heat shock protein family E (Hsp10) member 1 pseudogene 5	165.444	16.9387	3.00006	3.18023e-60	59.4975	3.28795	16	68686399	68686670	1						0
ENSG00000252481	SCARNA13	small Cajal body-specific RNA 13	124.94	12.8068	2.95461	2.03948e-47	46.6905	3.28626	14	95533355	95533629							1
ENSG00000217130	AL139100.1	NA	169.706	17.5577	2.98595	9.85291e-59	58.0064	3.27286	6	34744176	34744673		1					0
ENSG00000234106	SRP14P2	signal recognition particle 14 pseudogene 2	58.8828	6.09635	2.74118	3.01269e-24	23.521	3.27183	11	93535468	93535816	1						0
ENSG00000261236 #or# ENSG00000284054	MIR7112	block of proliferation 1 #or# microRNA 7112	11.6874	1.21078	1.71992	2.43485e-06	5.61353	3.27094	8	144262673	144262737				1			0
ENSG00000004059	ARF5	ADP ribosylation factor 5	98.1188	10.2143	2.90058	1.26054e-39	38.8994	3.26394	7	127589485	127589831							1
ENSG00000259358	AC026951.1	NA	11.5882	1.20676	1.57629	1.66373e-05	4.77892	3.26345	15	31765743	31768201		1					0
ENSG00000173163 #or# ENSG00000242735	RPSAP26	copper metabolism domain containing 1 #or# ribosomal protein SA pseudogene 26	77.0339	8.09587	2.77677	2.69261e-31	30.5698	3.25023	2	62146413	62147153	1						0
ENSG00000228830	AL160408.2	NA	10.942	1.1504	1.61574	1.14013e-05	4.94305	3.24966	1	234609421	234609483		1					0
ENSG00000263464	PPIAL4C	peptidylprolyl isomerase A like 4C	48.5305	5.10576	2.55632	5.38937e-21	20.2685	3.24869	1	149584393	149584464							1
ENSG00000132334	PTPRE	protein tyrosine phosphatase, receptor type E	10.3594	1.09002	1.53988	2.90061e-05	4.53751	3.24851	10	128070808	128072682							1
ENSG00000228986	AC234781.3	NA	12.5511	1.32288	1.74668	1.101e-06	5.95821	3.24606	0	155292802	155293432		1					0
ENSG00000255725	TDGP1	thymine-DNA glycosylase pseudogene 1	45.814	4.87351	2.53125	1.75741e-18	17.7551	3.23275	12	25803298	25804526	1						0
ENSG00000267736	HMGB2P1	high mobility group box 2 pseudogene 1	11.2879	1.20676	1.62724	8.82486e-06	5.05429	3.22556	19	1203209	1203842	1						0
ENSG00000230360	DDX10P2	DEAD-box helicase 10 pseudogene 2	29.3256	3.15796	2.32165	6.70427e-13	12.1736	3.2151	9	82086155	82088768	1						0
ENSG00000219085	NPM1P37	nucleophosmin 1 pseudogene 37	65.7612	7.11734	2.71377	3.08549e-28	27.5107	3.20783	6	69705287	69706160	1						0
ENSG00000210196	MT-TP	mitochondrially encoded tRNA proline	363.909	39.406	1.46433	7.11435e-05	4.14786	3.20709	0	15956	16023						1	0
ENSG00000258563	PSMA3P	proteasome subunit alpha 3 pseudogene	21.1265	2.29153	2.06639	1.43389e-09	8.84349	3.20467	14	60179382	60180016	1						0
ENSG00000237406	NDUFA9P1	NADH:ubiquinone oxidoreductase subunit A9 pseudogene 1	14.0995	1.54647	1.80725	3.37196e-07	6.47212	3.18859	22	35897270	35898404	1						0
ENSG00000260326	PHBP21	prohibitin pseudogene 21	27.225	2.99413	2.29759	7.69407e-13	12.1138	3.18472	16	52934813	52935635	1						0
ENSG00000231635	ATP5F1BP1	ATP synthase F1 subunit beta pseudogene 1	11.9614	1.31825	1.71567	1.72088e-06	5.76425	3.1817	2	98206151	98207724	1						0
ENSG00000067057 #or# ENSG00000278419	AL451164.3	phosphofructokinase, platelet #or# NA	32.7036	3.61441	2.37765	6.42587e-15	14.1921	3.17762	10	3144971	3145166		1					0
ENSG00000250526	CCT6P2	chaperonin containing TCP1 subunit 6 pseudogene 2	101.166	11.1848	2.80007	7.67546e-38	37.1149	3.17711	5	14639426	14641018	1						0
ENSG00000178685	PARP10	poly(ADP-ribose) polymerase family member 10	10.858	1.20212	1.57415	1.78233e-05	4.74901	3.1751	8	143986363	143986438							1
ENSG00000219806	ATP5PBP6	ATP synthase peripheral stalk-membrane subunit b pseudogene 6	26.9702	2.9861	2.21905	1.56512e-12	11.8055	3.17503	6	139614438	139615204	1						0
ENSG00000236792	AL513175.2	NA	10.8884	1.20614	1.62574	9.60421e-06	5.01754	3.17432	1	192247505	192247947		1					0
ENSG00000215035	FDPSP5	farnesyl diphosphate synthase pseudogene 5	24.3376	2.70151	2.18985	7.1113e-12	11.1481	3.17135	0	44476027	44476622	1						0
ENSG00000225715	AL512504.1	NA	23.2493	2.58137	2.08569	2.28172e-10	9.64174	3.17098	0	80709928	80710705		1					0
ENSG00000271072	PHBP20	prohibitin pseudogene 20	26.8559	2.98671	2.14179	1.69299e-11	10.7713	3.16861	15	72450657	72451474	1						0
ENSG00000235064	SLC25A5P2	solute carrier family 25 member 5 pseudogene 2	35.0854	3.90425	2.34212	1.09152e-14	13.962	3.16775	2	33839782	33840678	1						0
ENSG00000182179 #or# ENSG00000283726 /// ENSG00000182179	UBA7	ubiquitin like modifier activating enzyme 7 #or# microRNA 5193 /// ubiquitin like modifier activating enzyme 7	13.3157	1.49537	1.72538	1.93982e-06	5.71224	3.15455	3	49812448	49812543							1
ENSG00000259917	HNRNPLP2	heterogeneous nuclear ribonucleoprotein L pseudogene 2	37.3377	4.19626	2.45981	5.82505e-17	16.2347	3.15346	15	34489002	34490571	1						0
ENSG00000236603	RANP1	RAN, member RAS oncogene family pseudogene 1	280.77	31.7884	2.98419	2.52118e-96	95.5984	3.14282	6	30485940	30486590	1						0
ENSG00000133112 #or# ENSG00000253051	RF00322	tumor protein, translationally-controlled 1 #or# NA	14.1642	1.60685	1.79652	8.1698e-07	6.08779	3.13994	2	4827001	4827084		1					0
ENSG00000231313	CLIC1P1	chloride intracellular channel 1 pseudogene 1	15.1877	1.72359	1.82818	2.04191e-07	6.68996	3.13941	12	120914400	120915123	1						0
ENSG00000213409	C1QBPP2	complement C1q binding protein pseudogene 2	127.261	14.4669	2.87415	1.7708e-48	47.7518	3.13696	11	66761575	66762399	1						0
ENSG00000259461	ANP32BP3	acidic nuclear phosphoprotein 32 family member B pseudogene 3	10.4929	1.20212	1.50374	4.16647e-05	4.38023	3.12576	15	81117635	81118340	1						0
ENSG00000249119	MTND6P4	mitochondrially encoded NADH:ubiquinone oxidoreductase core subunit 6 pseudogene 4	375.101	43.0865	2.63606	3.0474e-23	22.5161	3.12197	5	134924123	134924644	1						0
ENSG00000076944 #or# ENSG00000268400 /// ENSG00000229833 #or# ENSG00000268400	AC008763.2	syntaxin binding protein 2 #or# NA /// PET100 homolog #or# NA	275.953	31.832	2.77227	1.35616e-36	35.8677	3.11587	19	7642034	7642118		1					0
ENSG00000105063	PPP6R1	protein phosphatase 6 regulatory subunit 1	48.7853	5.6331	2.44286	3.13873e-19	18.5032	3.11445	19	55247104	55247109							1
ENSG00000175768	TOMM5	translocase of outer mitochondrial membrane 5	180.663	20.8782	2.87581	1.97682e-57	56.704	3.11323	9	37588642	37588932							1
ENSG00000133101	CCNA1	cyclin A1	26.7952	3.09696	2.27399	1.65859e-12	11.7803	3.11305	13	36442666	36442870							1
ENSG00000089820 #or# ENSG00000284987 /// ENSG00000089820 /// ENSG00000089820 #or# ENSG00000102030	ARHGAP4	Rho GTPase activating protein 4 #or# N(alpha)-acetyltransferase 10, NatA catalytic subunit /// Rho GTPase activating protein 4 /// Rho GTPase activating protein 4 #or# NA	84.2692	9.7563	2.64455	7.63744e-30	29.1171	3.1106	0	153920739	153920808							1
ENSG00000283621 /// ENSG00000135446 #or# ENSG00000283621	MIR6759	microRNA 6759 /// cyclin dependent kinase 4 #or# microRNA 6759	30.695	3.55465	2.2556	7.74776e-14	13.1108	3.11023	12	57748618	57748682				1			0
ENSG00000251235	SNRPCP2	small nuclear ribonucleoprotein polypeptide C pseudogene 2	16.3022	1.89144	1.87115	7.51386e-08	7.12414	3.10751	5	76376675	76377149	1						0
ENSG00000111775 #or# ENSG00000111780 /// ENSG00000111780 #or# ENSG00000257218	AL021546.1	NA #or# glutamyl-tRNA amidotransferase subunit C /// cytochrome c oxidase subunit 6A1 #or# NA	306.99	36.0601	2.94828	2.05394e-104	103.687	3.08972	12	120459960	120460006		1					0
ENSG00000186743	TPI1P3	triosephosphate isomerase 1 pseudogene 3	15.5912	1.83971	1.83119	1.26778e-07	6.89695	3.08318	6	116038756	116039495	1						0
ENSG00000274422	AC245060.5	NA	12.6158	1.49537	1.66805	4.92268e-06	5.3078	3.07666	22	22283928	22287220		1					0
ENSG00000224488	SAMM50P1	SAMM50 sorting and assembly machinery component pseudogene 1	25.5016	3.05111	2.13384	4.28085e-11	10.3685	3.06318	9	17447145	17448543	1						0
ENSG00000185839	AL035411.1	NA	63.2772	7.68713	2.52016	8.06375e-24	23.0935	3.04117	1	58630841	58631530		1					0
ENSG00000255435	AP001267.3	NA	19.8521	2.4129	2.00177	2.32176e-09	8.63418	3.04045	11	118519616	118519696		1					0
ENSG00000226421	SLC25A5P5	solute carrier family 25 member 5 pseudogene 5	69.1057	8.44609	2.54706	3.52207e-25	24.4532	3.03245	7	32471513	32472409	1						0
ENSG00000177855	CACYBPP2	calcyclin binding protein pseudogene 2	146.395	17.9791	2.82257	6.26406e-52	51.2031	3.02547	2	183607442	183608119	1						0
ENSG00000168283 #or# ENSG00000269897	COMMD3-BMI1	BMI1 proto-oncogene, polycomb ring finger #or# COMMD3-BMI1 readthrough	16.2567	2.0122	1.85887	1.68278e-07	6.77397	3.01419	10	22326431	22326521							1
ENSG00000257576	HSPD1P4	heat shock protein family D (Hsp60) member 1 pseudogene 4	67.9598	8.43682	2.5332	9.59071e-24	23.0181	3.00991	12	56511002	56512703	1						0
ENSG00000161847	RAVER1	ribonucleoprotein, PTB binding 1	11.037	1.37863	1.56284	2.02594e-05	4.69337	3.00105	19	10323506	10323566							1
ENSG00000231167	YBX1P2	Y-box binding protein 1 pseudogene 2	226.11	28.3684	2.83644	1.016e-75	74.9931	2.99467	7	105582258	105583256	1						0
ENSG00000188460	ACTBP11	actin, beta pseudogene 11	21.1416	2.69749	1.97772	3.87121e-09	8.41215	2.97039	1	223863726	223864851	1						0
ENSG00000225531	AL807761.2	NA	15.6974	2.0122	1.80461	1.92422e-07	6.71575	2.96368	9	107116829	107117557		1					0
ENSG00000213197	AC012066.1	NA	19.6428	2.52037	1.93388	6.98534e-09	8.15581	2.96229	2	152389937	152390630		1					0
ENSG00000220744	RPL5P18	ribosomal protein L5 pseudogene 18	51.2238	6.59587	2.43531	7.09178e-20	19.1492	2.95718	6	127362513	127363403	1						0
ENSG00000198695	MT-ND6	mitochondrially encoded NADH:ubiquinone oxidoreductase core subunit 6	5711.53	735.873	2.64161	4.23962e-31	30.3727	2.95635	0	14149	14151						1	0
ENSG00000210144 /// ENSG00000210140 #or# ENSG00000210144	MT-TY	mitochondrially encoded tRNA cysteine #or# mitochondrially encoded tRNA tyrosine /// mitochondrially encoded tRNA tyrosine	239.161	30.942	2.35473	6.89777e-16	15.1613	2.95034	0	5826	5891						1	0
ENSG00000231300	EZH2P1	enhancer of zeste 2 polycomb repressive complex 2 subunit pseudogene 1	26.1752	3.3868	2.03796	1.01492e-10	9.99357	2.9502	21	35599732	35600022	1						0
ENSG00000227344	HAUS6P1	HAUS augmin like complex subunit 6 pseudogene 1	19.0228	2.46927	1.8693	8.67575e-08	7.06169	2.94558	7	53187388	53188938	1						0
ENSG00000186517	ARHGAP30	Rho GTPase activating protein 30	21.0921	2.75787	1.9898	5.04001e-09	8.29757	2.93508	1	161054402	161054473							1
ENSG00000187193 #or# ENSG00000259827	AC026461.1	metallothionein 1X #or# NA	87.7665	11.4867	2.6074	1.26635e-33	32.8974	2.93371	16	56687578	56687807		1					0
ENSG00000271711	AC069236.1	NA	17.5695	2.3008	1.86089	6.0711e-08	7.21673	2.93286	3	150611262	150611877		1					0
ENSG00000092853	CLSPN	claspin	284.296	37.4607	2.79523	2.75015e-76	75.5606	2.92395	1	35746965	35746992							1
ENSG00000213370	RANP6	RAN, member RAS oncogene family pseudogene 6	28.6217	3.78751	2.11406	1.52004e-11	10.8181	2.91779	4	173633728	173634371	1						0
ENSG00000242689 #or# ENSG00000255073 /// ENSG00000186660 #or# ENSG00000255073	ZFP91-CNTF	ZFP91 zinc finger protein #or# ZFP91-CNTF readthrough (NMD candidate) /// ciliary neurotrophic factor #or# ZFP91-CNTF readthrough (NMD candidate)	39.4181	5.22775	2.19565	4.14755e-13	12.3822	2.9146	11	58624034	58624639							1
ENSG00000232630	PRPS1P2	phosphoribosyl pyrophosphate synthetase 1 pseudogene 2	11.0977	1.49073	1.50855	3.49659e-05	4.45636	2.89618	9	125150653	125151589	1						0
ENSG00000257956	NOP56P3	NOP56 ribonucleoprotein pseudogene 3	15.4577	2.0766	1.82589	1.61226e-07	6.79256	2.89604	12	79558782	79559166	1						0
ENSG00000233080	LINC01399	long intergenic non-protein coding RNA 1399	28.0776	3.78813	2.01705	3.84648e-11	10.4149	2.88986	22	35194699	35194942			1				0
ENSG00000243974	VTI1BP1	vesicle transport through interaction with t-SNAREs 1B pseudogene 1	21.6595	2.93035	1.91218	1.21437e-08	7.91565	2.88585	3	100225374	100226073	1						0
ENSG00000259340	AC110588.1	NA	23.2878	3.1626	2.02211	1.02535e-09	8.98913	2.88039	15	96551381	96551517		1					0
ENSG00000213866	YBX1P10	Y-box binding protein 1 pseudogene 10	79.9061	10.8537	2.53304	5.32532e-28	27.2737	2.88011	9	35971344	35972318	1						0
ENSG00000243886	AC117440.1	NA	17.2155	2.35253	1.80326	9.82157e-08	7.00782	2.87142	3	137535572	137536142		1					0
ENSG00000237264	FTH1P11	ferritin heavy chain 1 pseudogene 11	105.99	14.5781	2.52947	1.78607e-35	34.7481	2.86206	8	81521682	81522232	1						0
ENSG00000215006	CHCHD2P2	coiled-coil-helix-coiled-coil-helix domain containing 2 pseudogene 2	30.4209	4.19286	2.10593	2.4636e-12	11.6084	2.85906	5	69333929	69334249	1						0
ENSG00000230750	SDAD1P2	SDA1 domain containing 1 pseudogene 2	28.7168	3.95938	2.1241	8.62629e-12	11.0642	2.85855	20	10385779	10387806	1						0
ENSG00000230832	AC241584.1	NA	52.2897	7.23531	2.32262	2.38877e-18	17.6218	2.8534	1	147082338	147083578		1					0
ENSG00000168918	INPP5D	inositol polyphosphate-5-phosphatase D	106.462	14.8038	2.59407	1.40154e-34	33.8534	2.84629	2	233205598	233205652							1
ENSG00000235165	CDK5P1	cyclin dependent kinase 5 pseudogene 1	31.2957	4.35545	2.14253	8.95164e-13	12.0481	2.84507	8	122769274	122770150	1						0
ENSG00000151846	PABPC3	poly(A) binding protein cytoplasmic 3	564.923	78.6408	2.77236	5.61192e-119	118.251	2.8447	13	25098095	25099254							1
ENSG00000139180 #or# ENSG00000255639 /// ENSG00000139180 #or# ENSG00000272921 /// as__ENSG00000139180 #or# as__ENSG00000272921 /// as__ENSG00000139180 #or# as__ENSG00000255639 /// ENSG00000139180 #or# ENSG00000255639 #or# ENSG00000272921	AC005833.2	NADH:ubiquinone oxidoreductase subunit A9 #or# NA /// NADH:ubiquinone oxidoreductase subunit A9 #or# NA #or# NA	62.8929	8.77993	2.45111	3.46203e-24	23.4607	2.84062	12	4744517	4744581		1					0
ENSG00000254406	AP001994.1	NA	75.9456	10.6209	2.48093	1.0193e-27	26.9917	2.83806	11	119821304	119822129		1					0
ENSG00000220739	AL513475.2	NA	17.5159	2.45937	1.79527	1.82951e-07	6.73767	2.8323	6	144708106	144708497		1					0
ENSG00000213177	PRDX2P4	peroxiredoxin 2 pseudogene 4	82.0826	11.539	2.47893	4.29228e-30	29.3673	2.83055	6	100136064	100136663	1						0
ENSG00000159176	CSRP1	cysteine and glycine rich protein 1	10.6295	1.49475	1.47643	5.89973e-05	4.22917	2.83009	1	201495599	201496304							1
ENSG00000241723	AC074276.1	NA	27.134	3.84325	2.03802	2.981e-11	10.5256	2.8197	3	158275809	158276421		1					0
ENSG00000228328	AL158201.1	NA	24.2081	3.4512	2.01887	4.89473e-10	9.31027	2.81032	0	68070520	68071767		1					0
ENSG00000074370	ATP2A3	ATPase sarcoplasmic/endoplasmic reticulum Ca2+ transporting 3	26.3046	3.78689	2.04676	8.41269e-11	10.0751	2.79623	17	3953281	3953429							1
ENSG00000232864	NUCKS1P1	nuclear casein kinase and cyclin dependent kinase substrate 1 pseudogene 1	73.0541	10.5227	2.45002	1.67993e-25	24.7747	2.79546	1	227410617	227411319	1						0
ENSG00000105393 #or# ENSG00000269307	AC010463.1	BRISC and BRCA1 A complex member 1 #or# NA	10.7286	1.55111	1.50001	3.23749e-05	4.48979	2.79009	19	17282864	17282966		1					0
ENSG00000225053	PRPF38AP1	PRP38 domain containing A pseudogene 1	10.3331	1.49537	1.44158	8.139e-05	4.08943	2.78871	10	8161260	8162192	1						0
ENSG00000259707	AC105339.4	NA	39.6051	5.73871	2.18795	2.81488e-14	13.5505	2.78689	15	82691723	82692358		1					0
ENSG00000264186	SNRPCP4	small nuclear ribonucleoprotein polypeptide C pseudogene 4	18.5546	2.69224	1.84052	3.62691e-08	7.44046	2.7849	18	2990652	2991078	1						0
ENSG00000213956	AC112187.1	NA	16.1617	2.34789	1.74103	3.36295e-07	6.47328	2.78314	5	50633124	50633602		1					0
ENSG00000224820	BTF3P4	basic transcription factor 3 pseudogene 4	60.8267	8.88925	2.30301	3.35545e-21	20.4742	2.77457	9	72107818	72108312	1						0
ENSG00000127084	FGD3	FYVE, RhoGEF and PH domain containing 3	11.3718	1.66259	1.54339	2.39827e-05	4.6201	2.77396	9	93034544	93034619							1
ENSG00000050767	COL23A1	collagen type XXIII alpha 1 chain	36.3708	5.33738	2.18054	1.75536e-12	11.7556	2.76858	5	178523505	178523713							1
ENSG00000227176	AC092641.1	NA	15.2221	2.2364	1.65355	2.18966e-06	5.65962	2.76692	2	170077224	170077594		1					0
ENSG00000235698	PA2G4P2	proliferation-associated 2G4 pseudogene 2	23.8693	3.51158	1.97643	9.76886e-10	9.01016	2.76496	20	12380056	12381255	1						0
ENSG00000272540	AL662797.1	NA	27.5638	4.08014	2.04547	1.51573e-10	9.81938	2.75609	6	30723105	30723877		1					0
ENSG00000254481	PTP4A2P2	protein tyrosine phosphatase type IVA, member 2 pseudogene 2	19.2281	2.86534	1.80963	5.41527e-08	7.26638	2.74644	11	134123828	134124329	1						0
ENSG00000223396	RPS10P7	ribosomal protein S10 pseudogene 7	11.1969	1.67187	1.51854	2.77708e-05	4.55641	2.74357	1	201520056	201520549	1						0
ENSG00000233830	EIF4HP1	eukaryotic translation initiation factor 4H pseudogene 1	13.4795	2.01683	1.57067	1.41576e-05	4.84901	2.7406	7	27458163	27458849	1						0
ENSG00000205579	DYNLL1P1	dynein light chain LC8-type 1 pseudogene 1	59.1185	8.85206	2.27636	8.36579e-20	19.0775	2.73953	14	81246295	81246563	1						0
ENSG00000213290	PGK1P2	phosphoglycerate kinase 1, pseudogene 2	18.7639	2.81299	1.87449	2.24496e-08	7.64879	2.73778	19	12560913	12561105	1						0
ENSG00000213383	AC104297.1	NA	69.6833	10.4478	2.39909	8.60569e-25	24.0652	2.73762	3	17871729	17872598		1					0
ENSG00000229022	AL365366.1	NA	24.3719	3.67015	1.92227	1.99128e-09	8.70087	2.73131	1	241831935	241832787		1					0
ENSG00000229161	TCP1P1	t-complex 1 pseudogene 1	185.989	28.0101	2.57265	2.1893e-58	57.6597	2.73119	7	42802369	42802494	1						0
ENSG00000270141 #or# ENSG00000277925	TERC	telomerase RNA component #or# NA	245.182	37.2139	2.59437	1.82945e-64	63.7377	2.71994	3	169764520	169765060							1
ENSG00000233662	CALM2P4	calmodulin 2 pseudogene 4	17.3298	2.64113	1.73622	6.13682e-07	6.21206	2.71402	13	98640814	98641239	1						0
ENSG00000121552	CSTA	cystatin A	21.1224	3.22236	1.3856	0.000170475	3.76834	2.71259	3	122337673	122338270							1
ENSG00000236530	KPNA2P1	karyopherin subunit alpha 2 pseudogene 1	11.3071	1.72761	1.52548	2.73115e-05	4.56365	2.71038	4	80079532	80081122	1						0
ENSG00000106991	ENG	endoglin	10.8692	1.66259	1.41785	0.000118815	3.92513	2.70874	9	127825789	127825860							1
ENSG00000213684	LDHBP2	lactate dehydrogenase B pseudogene 2	348.712	53.45	2.60336	2.3537e-101	100.628	2.70577	0	76334841	76335845	1						0
ENSG00000272888 #or# ENSG00000279765 /// ENSG00000279765	AC013394.1	NA /// long intergenic non-protein coding RNA 1578 #or# NA	11.5165	1.77995	1.47527	2.24874e-05	4.64806	2.69379	15	92948952	92949230		1					0
ENSG00000228143	AL512649.1	NA	15.0127	2.35253	1.66032	1.42099e-06	5.84741	2.67391	9	106722350	106722930		1					0
ENSG00000198744 /// ENSG00000198744 #or# ENSG00000248527	MTCO3P12	mitochondrially encoded cytochrome c oxidase III pseudogene 12 /// mitochondrially encoded cytochrome c oxidase III pseudogene 12 #or# mitochondrially encoded ATP synthase 6 pseudogene 1	1492.01	234.133	2.42964	2.60366e-31	30.5844	2.67186	1	634376	634922	1						0
ENSG00000233383	AC073089.1	NA	79.2902	12.4519	2.34797	2.94815e-26	25.5304	2.67077	7	67089257	67089470		1					0
ENSG00000250444	CCT5P1	chaperonin containing TCP1 subunit 5 pseudogene 1	74.6065	11.7236	2.38478	5.19068e-26	25.2848	2.66989	5	115512077	115513694	1						0
ENSG00000249489	GAPDHP70	glyceraldehyde 3 phosphate dehydrogenase pseudogene 70	15.7015	2.46927	1.62707	4.91385e-06	5.30858	2.66874	11	88408179	88409223	1						0
ENSG00000228938	SNRPD2P1	small nuclear ribonucleoprotein D2 pseudogene 1	448.138	70.6769	2.60243	1.91156e-127	126.719	2.66463	10	89978717	89979070	1						0
ENSG00000135636	DYSF	dysferlin	33.1294	5.22652	2.06982	2.89894e-11	10.5378	2.66419	2	71643965	71644033							1
ENSG00000256745	AP002784.2	NA	175.723	27.8169	2.46073	5.21014e-50	49.2832	2.65927	11	94188449	94188997		1					0
ENSG00000260747	AC022968.1	NA	29.3327	4.64869	2.00695	5.12542e-11	10.2903	2.65761	18	68277802	68278243		1					0
ENSG00000130755	GMFG	glia maturation factor gamma	20.997	3.33044	1.85819	3.09455e-08	7.5094	2.6564	19	39332904	39333126							1
ENSG00000255642	PABPC1P4	poly(A) binding protein cytoplasmic 1 pseudogene 4	205.171	32.5622	2.54564	2.03095e-55	54.6923	2.65556	12	63822021	63823895	1						0
ENSG00000214297	ALDOAP2	aldolase, fructose-bisphosphate A pseudogene 2	13.3197	2.1243	1.5844	4.62427e-06	5.33496	2.6485	10	125666875	125667950	1						0
ENSG00000237922	AL450309.1	NA	11.0977	1.7747	1.44437	6.18245e-05	4.20884	2.64462	1	236285976	236286276		1					0
ENSG00000229927 /// ENSG00000165874 #or# ENSG00000229927	RHEBP1	RHEB pseudogene 1 /// family with sequence similarity 35 member B, pseudogene #or# RHEB pseudogene 1	13.974	2.2364	1.53918	1.40193e-05	4.85327	2.6435	10	46634911	46635466	1						0
ENSG00000249098	AC055733.1	NA	45.2961	7.28518	2.14459	4.16842e-15	14.38	2.63635	3	130918226	130918703		1					0
ENSG00000225787	LSM3P3	LSM3 homolog, U6 small nuclear RNA and mRNA degradation associated pseudogene 3	55.9074	9.00537	2.20592	5.01025e-19	18.3001	2.63418	2	85102389	85102694	1						0
ENSG00000265646	TUFMP1	Tu translation elongation factor, mitochondrial pseudogene 1	82.128	13.2574	2.3277	1.76079e-26	25.7543	2.63108	17	27082690	27084036	1						0
ENSG00000105988	NHP2P1	NHP2 ribonucleoprotein pseudogene 1	106.161	17.1629	2.34321	1.68123e-33	32.7744	2.62889	10	92216332	92216793	1						0
ENSG00000240135	PSMD12P	proteasome 26S subunit, non-ATPase, 12 pseudogene	36.9493	5.97497	2.15996	2.46693e-14	13.6078	2.62854	3	72876737	72878102	1						0
ENSG00000196535	MYO18A	myosin XVIIIA	11.3222	1.83106	1.42227	0.000101374	3.99407	2.62841	17	29133761	29133858							1
ENSG00000227968	BUB3P1	BUB3 mitotic checkpoint protein pseudogene 1	27.309	4.42387	2.0167	6.93336e-11	10.1591	2.62599	7	108994031	108995029	1						0
ENSG00000258373	SLC25A3P2	solute carrier family 25 member 3 pseudogene 2	89.4717	14.5298	2.33134	2.14606e-28	27.6684	2.62242	12	111992996	111993875	1						0
ENSG00000263142 /// ENSG00000262633 #or# ENSG00000263142	LRRC37A17P	leucine rich repeat containing 37 member A17, pseudogene /// NA #or# leucine rich repeat containing 37 member A17, pseudogene	15.0582	2.46927	1.53887	1.75695e-05	4.75524	2.60839	17	47054518	47054569	1						0
ENSG00000232699	BDH2P1	3-hydroxybutyrate dehydrogenase 2, pseudogene 1	31.1208	5.11565	1.9355	1.3301e-10	9.87612	2.60489	6	99174744	99175479	1						0
ENSG00000230508	RPL19P21	ribosomal protein L19 pseudogene 21	57.9696	9.53488	2.24143	1.46406e-19	18.8344	2.60401	0	150993501	150994091	1						0
ENSG00000226415	TPI1P1	triosephosphate isomerase 1 pseudogene 1	81.5991	13.4856	2.3085	2.0836e-26	25.6812	2.59713	1	76699789	76700538	1						0
ENSG00000234825	XRCC6P2	X-ray repair cross complementing 6 pseudogene 2	179.836	29.7901	2.43779	1.51773e-52	51.8188	2.59378	0	150231075	150232896	1						0
ENSG00000236493	EIF2S2P3	eukaryotic translation initiation factor 2 subunit 2 beta pseudogene 3	25.6422	4.2486	1.88769	2.00596e-09	8.69768	2.59346	10	92668745	92669743	1						0
ENSG00000264281	AC016596.2	NA	391.604	64.9141	2.50032	6.832e-101	100.165	2.59279	5	55944656	55944733		1					0
ENSG00000268660	LETM1P2	leucine zipper and EF-hand containing transmembrane protein 1 pseudogene 2	12.4904	2.07319	1.44183	7.65257e-05	4.11619	2.59089	19	58044592	58046769	1						0
ENSG00000235400	AC104837.1	NA	15.218	2.52903	1.65504	1.94788e-06	5.71044	2.58913	1	78749073	78750659		1					0
ENSG00000255059	PPIAP43	peptidylprolyl isomerase A pseudogene 43	64.7913	10.7801	2.21522	3.64377e-21	20.4384	2.58743	11	100666459	100666962	1						0
ENSG00000166847 #or# ENSG00000260482	AC008870.1	dynactin subunit 5 #or# NA	21.0011	3.49829	1.78204	7.94983e-08	7.09964	2.58574	16	23675194	23675499		1					0
ENSG00000213430	HSPD1P1	heat shock protein family D (Hsp60) member 1 pseudogene 1	229.82	38.3418	2.46517	2.94292e-65	64.5312	2.58352	5	21882585	21884310	1						0
ENSG00000239374	AC090013.1	NA	91.545	15.273	2.35791	5.88721e-29	28.2301	2.5835	12	116755395	116755874		1					0
ENSG00000267293	AC012569.1	NA	24.0634	4.01512	1.84087	1.12767e-08	7.94782	2.58333	18	46028306	46029829		1					0
ENSG00000161960 /// ENSG00000161960 #or# ENSG00000209582	EIF4A1	eukaryotic translation initiation factor 4A1 /// eukaryotic translation initiation factor 4A1 #or# small nucleolar RNA, H/ACA box 48	35.3898	5.90718	2.02615	5.75501e-12	11.24	2.58279	17	7578101	7578195							1
ENSG00000204622	HLA-J	major histocompatibility complex, class I, J (pseudogene)	30.4816	5.10916	2.01598	6.81005e-11	10.1668	2.57678	6	30009535	30009539	1						0
ENSG00000092929	UNC13D	unc-13 homolog D	10.5385	1.77933	1.41689	9.63576e-05	4.01611	2.56625	17	75843159	75843266							1
ENSG00000256849	TCP1P3	t-complex 1 pseudogene 3	33.0383	5.57952	2.06811	1.8394e-12	11.7353	2.56593	12	19941521	19943018	1						0
ENSG00000277952	AC092745.3	NA	19.0188	3.21432	1.74843	1.08775e-07	6.96347	2.56484	12	8340182	8340397		1					0
ENSG00000232499	AL391058.1	NA	15.8724	2.69811	1.57537	3.49271e-06	5.45684	2.5565	1	113449700	113450728		1					0
ENSG00000267533	AP002414.4	NA	12.5399	2.13296	1.44002	7.49617e-05	4.12516	2.5556	18	12067173	12068259		1					0
ENSG00000241081	RPL22P2	ribosomal protein L22 pseudogene 2	99.8008	16.9978	2.31645	4.5502e-32	31.342	2.5537	14	76886377	76886750	1						0
ENSG00000252577	SCARNA20	small Cajal body-specific RNA 20	18.1439	3.09356	1.64958	2.61872e-06	5.58191	2.55215	17	60231516	60231646							1
ENSG00000229083	PSMA6P2	proteasome subunit alpha 6 pseudogene 2	80.873	13.794	2.24591	4.31016e-25	24.3655	2.55162	0	12826669	12826833	1						0
ENSG00000228057	SEC63P1	SEC63 homolog, protein translocation regulator pseudogene 1	58.4985	9.98329	2.17359	1.15638e-18	17.9369	2.55081	1	97545701	97546958	1						0
ENSG00000225630	MTND2P28	mitochondrially encoded NADH:ubiquinone oxidoreductase core subunit 2 pseudogene 28	2061.04	353.237	2.36075	1.13777e-35	34.9439	2.54466	1	629640	630683	1						0
ENSG00000226535	AL445487.1	NA	59.1488	10.1598	2.16564	2.35247e-18	17.6285	2.54148	9	107169569	107171148		1					0
ENSG00000236480	PKMP1	pyruvate kinase M1/2 pseudogene 1	16.6562	2.86472	1.66151	1.4678e-06	5.83333	2.5396	1	114537777	114537840	1						0
ENSG00000253223	AC110998.1	NA	15.3738	2.64515	1.65966	1.88898e-06	5.72377	2.53905	8	66984135	66986187		1					0
ENSG00000265735	RN7SL5P	RNA, 7SL, cytoplasmic 5, pseudogene	34.6899	5.97621	2.02488	7.38988e-12	11.1314	2.53721	9	9442060	9442380	1						0
ENSG00000220924	OSTCP4	oligosaccharyltransferase complex subunit pseudogene 4	12.6573	2.18468	1.47965	3.27997e-05	4.48413	2.53447	4	112685055	112685503	1						0
ENSG00000214881	TMEM14DP	transmembrane protein 14D, pseudogene	16.9758	2.93375	1.69471	1.19216e-06	5.92366	2.53266	10	68544489	68544833	1						0
ENSG00000015285	WAS	Wiskott-Aldrich syndrome	13.2854	2.29678	1.49727	3.06294e-05	4.51386	2.53215	0	48689320	48689594							1
ENSG00000260689	HNRNPA3P11	heterogeneous nuclear ribonucleoprotein A3 pseudogene 11	10.4777	1.83106	1.32155	0.00026005	3.58494	2.51658	15	57246960	57247893	1						0
ENSG00000227890	PSMA2P3	proteasome subunit alpha 2 pseudogene 3	211.508	36.9795	2.36754	1.93942e-59	58.7123	2.51591	2	202179297	202179971	1						0
ENSG00000214391	TUBAP2	tubulin alpha pseudogene 2	491.327	86.7241	2.44952	8.84382e-124	123.053	2.50218	11	90282560	90284172	1						0
ENSG00000213148	AC073465.1	NA	108.296	19.1187	2.25272	5.36034e-31	30.2708	2.50193	2	173431349	173431812		1					0
ENSG00000168961	LGALS9	galectin 9	12.6613	2.24042	1.5161	2.66652e-05	4.57405	2.49859	17	27648836	27649555							1
ENSG00000007545 #or# ENSG00000261732 /// ENSG00000261732 /// ENSG00000206053 #or# ENSG00000261732	AL031708.1	Jupiter microtubule associated homolog 2 #or# NA /// cramped chromatin regulator homolog 1 #or# NA /// NA	12.6118	2.2364	1.44897	4.66374e-05	4.33127	2.49552	16	1685757	1686715		1					0
ENSG00000196834	POTEI	POTE ankyrin domain family member I	14.5485	2.58477	1.6131	5.66443e-06	5.24684	2.49277	2	130463908	130464144							1
ENSG00000254780	AC023232.1	NA	111.035	19.812	2.27587	2.36771e-33	32.6257	2.48657	11	47905323	47905607		1					0
ENSG00000276180	HIST1H4I	histone cluster 1 H4 family member i	124.975	22.3742	2.28157	7.46585e-37	36.1269	2.48173	6	27139621	27139881							1
ENSG00000133124 /// ENSG00000133124 #or# ENSG00000260548	IRS4	insulin receptor substrate 4 #or# NA /// insulin receptor substrate 4	31.0561	5.5755	1.95942	3.9919e-11	10.3988	2.4777	0	108732482	108732570							1
ENSG00000259137	AL109766.1	NA	24.3264	4.37276	1.85663	1.12861e-08	7.94746	2.47591	14	44120210	44120761		1					0
ENSG00000187534	PRR13P5	proline rich 13 pseudogene 5	12.7412	2.3008	1.51335	1.86286e-05	4.72982	2.46929	19	39943239	39943680	1						0
ENSG00000155093	PTPRN2	protein tyrosine phosphatase, receptor type N2	25.3267	4.59697	1.87725	4.50146e-09	8.34665	2.46191	7	158110825	158110827							1
ENSG00000258605	DYNLL1P2	dynein light chain LC8-type 1 pseudogene 2	46.5219	8.4972	2.03253	9.07883e-15	14.042	2.45285	14	81412970	81413239	1						0
ENSG00000113296	THBS4	thrombospondin 4	11.9574	2.18468	1.41182	6.8988e-05	4.16123	2.45241	5	80083080	80083188							1
ENSG00000215817	ZC3H11B	zinc finger CCCH-type containing 11B	15.7278	2.87399	1.61568	5.00345e-06	5.30073	2.45219	1	219609606	219609626							1
ENSG00000229097	CALM2P2	calmodulin 2 pseudogene 2	10.9875	2.0122	1.3184	0.000333899	3.47638	2.44902	10	70163685	70164124	1						0
ENSG00000225496	AC104651.1	NA	111.884	20.5066	2.23299	6.82757e-33	32.1657	2.44784	2	111940302	111941036		1					0
ENSG00000202337	RNU6-8	RNA, U6 small nuclear 8	47.6213	8.7313	1.99257	1.7924e-13	12.7466	2.44734	14	32203163	32203269							1
ENSG00000270878	AL136038.4	NA	13.0952	2.40363	1.45062	4.17207e-05	4.37965	2.44575	14	63594031	63595291		1					0
ENSG00000201998	SNORA23	small nucleolar RNA, H/ACA box 23	11.562	2.1243	1.411	9.9878e-05	4.00053	2.44433	11	9428773	9428954					1		0
ENSG00000183199	HSP90AB3P	heat shock protein 90 alpha family class B member 3, pseudogene	338.125	62.2698	2.36288	3.77904e-78	77.4226	2.44095	4	87891843	87894015	1						0
ENSG00000279483	AC090498.1	NA	2319.68	427.388	2.238	2.92175e-29	28.5344	2.44031	7	137513859	137513933		1					0
ENSG00000100427	MLC1	megalencephalic leukoencephalopathy with subcortical cysts 1	14.6285	2.69749	1.51126	2.04253e-05	4.68983	2.43909	22	50070542	50070583							1
ENSG00000130303	BST2	bone marrow stromal cell antigen 2	16.1425	2.97682	1.54479	1.41255e-05	4.85	2.43902	19	17403791	17403824							1
ENSG00000180767	CHST13	carbohydrate sulfotransferase 13	11.5124	2.12368	1.43491	7.46649e-05	4.12688	2.43855	3	126542412	126542879							1
ENSG00000270694	AC211469.2	NA	10.2532	1.89206	1.30575	0.000242536	3.61522	2.43805	7	72722885	72723089		1					0
ENSG00000244414	CFHR1	complement factor H related 1	10.8732	2.00818	1.34725	0.000196835	3.7059	2.43682	1	196828070	196828167							1
ENSG00000227347	HNRNPKP2	heterogeneous nuclear ribonucleoprotein K pseudogene 2	18.6345	3.44316	1.6236	1.74344e-06	5.75859	2.43617	2	136199114	136200503	1						0
ENSG00000215349	MRPL3P1	mitochondrial ribosomal protein L3 pseudogene 1	27.8986	5.17016	1.87919	5.00385e-10	9.3007	2.43191	13	19304593	19305625	1						0
ENSG00000268282	AC010328.2	NA	25.985	4.82581	1.81159	3.4194e-09	8.46605	2.42884	19	53004040	53005150		1					0
ENSG00000173614 #or# ENSG00000241326	AL603962.1	nicotinamide nucleotide adenylyltransferase 1 #or# NA	22.5343	4.19688	1.77936	5.57565e-08	7.2537	2.42473	1	9984283	9984568		1					0
ENSG00000226273	AC079305.2	NA	10.7519	2.00818	1.30051	0.000300679	3.5219	2.42063	2	177177695	177178255		1					0
ENSG00000256393	RPL41P5	ribosomal protein L41 pseudogene 5	400.691	74.8773	2.31843	2.50521e-84	83.6012	2.41989	12	93083598	93083675	1						0
ENSG00000258648	UBE2CP1	ubiquitin conjugating enzyme E2 C pseudogene 1	132.07	24.754	2.2503	4.02295e-38	37.3955	2.41558	14	30683045	30683598	1						0
ENSG00000238076	MRPL48P1	mitochondrial ribosomal protein L48 pseudogene 1	35.233	6.60638	1.86401	1.42371e-10	9.84658	2.415	6	10459906	10460541	1						0
ENSG00000226964	RHEBP2	RHEB pseudogene 2	19.8025	3.72311	1.56874	3.00026e-06	5.52284	2.4111	10	47706203	47706802	1						0
ENSG00000168679	SLC16A4	solute carrier family 16 member 4	19.5477	3.67541	1.66795	5.7187e-07	6.2427	2.41102	1	110378944	110379356							1
ENSG00000265298	AC132812.1	NA	21.3813	4.02099	1.64859	2.47675e-07	6.60612	2.41073	17	64750420	64751311		1					0
ENSG00000213080	AL354714.2	NA	10.3786	1.95244	1.26878	0.000466219	3.33141	2.41027	1	160894980	160896076		1					0
ENSG00000189171 #or# ENSG00000271853	AL162258.1	S100 calcium binding protein A13 #or# NA	128.266	24.1582	2.23336	1.29724e-35	34.887	2.40855	1	153627508	153627598		1					0
ENSG00000238072	AC009244.1	NA	48.1998	9.07905	2.01382	1.1025e-14	13.9576	2.40842	7	129410113	129410370		1					0
ENSG00000270706	PRMT1P1	protein arginine methyltransferase 1 pseudogene 1	64.8974	12.225	2.06241	1.17058e-19	18.9316	2.40833	5	177265580	177266588	1						0
ENSG00000249353	NPM1P27	nucleophosmin 1 pseudogene 27	624.326	118.144	2.37208	4.0198e-154	153.396	2.40175	5	93682838	93683667	1						0
ENSG00000213312	RPL7AP34	ribosomal protein L7a pseudogene 34	61.0208	11.5477	2.08421	2.68997e-19	18.5703	2.4017	6	63548708	63549508	1						0
ENSG00000261208	AL365475.1	NA	10.6072	2.00756	1.31336	0.000273579	3.56292	2.40153	14	52287975	52289268		1					0
ENSG00000255993	PSMC1P9	proteasome 26S subunit, ATPase 1 pseudogene 9	25.0526	4.76481	1.81019	1.04841e-08	7.97947	2.39447	12	18692762	18694096	1						0
ENSG00000280346	FP236240.3	NA	14.1379	2.69749	1.46366	2.04536e-05	4.68923	2.38988	21	6507017	6507389		1					0
ENSG00000232905	AL162393.1	NA	26.156	4.99304	1.76664	2.60479e-08	7.58423	2.38915	9	113850687	113851632		1					0
ENSG00000146250	PRSS35	serine protease 35	17.0901	3.2713	1.50494	1.58445e-05	4.80012	2.38522	6	83524684	83525704							1
ENSG00000130396	AFDN	afadin, adherens junction formation factor	2039.67	390.624	2.31174	1.7887e-74	73.7475	2.38448	6	167969782	167969903							1
ENSG00000231369	Z97353.1	NA	109.806	21.0578	2.13885	4.84078e-30	29.3151	2.38253	22	26886909	26887316		1					0
ENSG00000244226	ILF2P1	interleukin enhancer binding factor 2 pseudogene 1	17.6493	3.38619	1.58554	5.39832e-06	5.26774	2.38188	3	65687301	65688468	1						0
ENSG00000243759	ST13P15	ST13, Hsp70 interacting protein pseudogene 15	11.3566	2.18004	1.35314	0.000192133	3.7164	2.38111	3	143517123	143518229	1						0
ENSG00000118939 #or# ENSG00000261553 /// ENSG00000136153 #or# ENSG00000261553	AL137782.1	LIM domain 7 #or# NA /// ubiquitin C-terminal hydrolase L3 #or# NA	160.889	30.9312	2.23332	2.03855e-45	44.6907	2.37893	13	75623271	75623320		1					0
ENSG00000256093	AC122688.1	NA	19.1138	3.67479	1.67463	4.14984e-07	6.38197	2.37888	12	125056359	125056581		1					0
ENSG00000232387	SKA2P1	spindle and kinetochore associated complex subunit 2 pseudogene 1	41.7816	8.03611	1.91506	1.24868e-12	11.9035	2.3783	9	122761844	122762233	1						0
ENSG00000188219	POTEE	POTE ankyrin domain family member E	13.1407	2.52965	1.4283	6.80127e-05	4.16741	2.37704	2	131263355	131263591							1
ENSG00000255977	AC006927.1	NA	14.5789	2.80836	1.51142	1.79023e-05	4.74709	2.37608	12	7606834	7607331		1					0
ENSG00000248873	SERBP1P6	SERPINE1 mRNA binding protein 1 pseudogene 6	20.2324	3.89962	1.62643	1.29499e-06	5.88774	2.37526	5	42465400	42466012	1						0
ENSG00000234782	TPT1P9	tumor protein, translationally-controlled 1 pseudogene 9	941.289	182.272	2.31513	2.95356e-128	127.53	2.36854	9	118082869	118083382	1						0
ENSG00000233859	ADH5P4	alcohol dehydrogenase 5 (class III), chi polypeptide, pseudogene 4	46.4724	9.00414	1.9744	1.95779e-13	12.7082	2.36771	6	65836930	65838039	1						0
ENSG00000218980	FTH1P15	ferritin heavy chain 1 pseudogene 15	18.9389	3.67077	1.6264	8.9397e-07	6.04868	2.3672	6	57004520	57004799	1						0
ENSG00000254449	SF3A3P2	splicing factor 3a, subunit 3 pseudogene 2	47.9024	9.30727	1.98075	2.06045e-14	13.686	2.36367	11	123597946	123599452	1						0
ENSG00000213126	AC092642.1	NA	25.6615	4.98964	1.75265	1.0046e-08	7.99801	2.3626	2	179814251	179814675		1					0
ENSG00000256356	HSPA8P5	heat shock protein family A (Hsp70) member 8 pseudogene 5	33.3427	6.48779	1.90644	7.95569e-11	10.0993	2.36157	12	4097451	4099519	1						0
ENSG00000274427	AC145423.2	NA	10.318	2.00818	1.25883	0.000597866	3.2234	2.3612	12	123515275	123515513		1					0
ENSG00000262967	AC005921.2	NA	30.1468	5.86813	1.85889	2.93124e-09	8.53295	2.36103	17	50695360	50695449		1					0
ENSG00000214263	RPSAP53	ribosomal protein SA pseudogene 53	16.7857	3.27006	1.56051	5.22616e-06	5.28182	2.35984	13	67266845	67267706	1						0
ENSG00000254244	PAICSP4	phosphoribosylaminoimidazole carboxylase, phosphoribosylaminoimidazole succinocarboxamide synthetase pseudogene 4	42.352	8.26094	1.88472	1.7412e-12	11.7592	2.35805	8	4787332	4788584	1						0
ENSG00000165121	AL353743.1	NA	13.8446	2.70213	1.43021	4.9572e-05	4.30476	2.35715	9	85849346	85849542		1					0
ENSG00000230067	HSPD1P6	heat shock protein family D (Hsp60) member 1 pseudogene 6	28.2333	5.5111	1.79886	1.44892e-09	8.83896	2.35699	3	36768725	36769260	1						0
ENSG00000230146	SEPHS1P4	selenophosphate synthetase 1 pseudogene 4	17.2802	3.38619	1.5831	4.1404e-06	5.38296	2.35139	0	73769248	73770423	1						0
ENSG00000111859	NEDD9	neural precursor cell expressed, developmentally down-regulated 9	14.6436	2.86997	1.4773	2.93276e-05	4.53272	2.35116	6	11352157	11352780							1
ENSG00000127824	TUBA4A	tubulin alpha 4a	41.0393	8.04941	1.94848	1.00055e-12	11.9998	2.35005	2	219252788	219252993							1
ENSG00000135317 #or# ENSG00000271793 /// ENSG00000135316 #or# ENSG00000271793	AL589666.1	synaptotagmin binding cytoplasmic RNA interacting protein #or# NA /// sorting nexin 14 #or# NA	73.2796	14.3991	2.05478	2.85234e-19	18.5448	2.34743	6	85557978	85558060		1					0
ENSG00000249395	CASC9	cancer susceptibility 9 (non-protein coding)	12.8403	2.52501	1.37353	0.000141749	3.84848	2.34632	8	75223898	75224358							1
ENSG00000253785	AC008429.2	NA	114.942	22.6077	2.14299	8.46571e-32	31.0723	2.34602	5	172975511	172976374		1					0
ENSG00000236852	BX322784.1	NA	143.656	28.3213	2.18205	4.99329e-33	32.3016	2.34265	0	62779250	62780326		1					0
ENSG00000229241	PNPT1P1	polyribonucleotide nucleotidyltransferase 1 pseudogene 1	12.8059	2.53366	1.43753	4.18955e-05	4.37783	2.33752	3	3981981	3984295	1						0
ENSG00000229107	ABHD17AP4	abhydrolase domain containing 17A pseudogene P4	12.456	2.46803	1.44484	5.43455e-05	4.26484	2.33541	22	20667836	20668220	1						0
ENSG00000214192	UBE2V1P2	ubiquitin conjugating enzyme E2 V1 pseudogene 2	11.2767	2.23578	1.34858	0.000177013	3.75199	2.3345	3	175718231	175718670	1						0
ENSG00000231822	AC019097.1	NA	26.8902	5.33862	1.76593	5.60957e-09	8.25107	2.33254	2	99102018	99102752		1					0
ENSG00000198658	ABHD17AP1	abhydrolase domain containing 17A pseudogene 1	27.7196	5.50585	1.79854	2.21186e-09	8.65524	2.33187	1	148149161	148149566	1						0
ENSG00000213938	SEPHS1P6	selenophosphate synthetase 1 pseudogene 6	14.145	2.81361	1.419	5.86676e-05	4.2316	2.32979	2	199659551	199660729	1						0
ENSG00000227063	RPL41P1	ribosomal protein L41 pseudogene 1	2146.42	428.975	2.12769	2.38287e-26	25.6229	2.32297	20	21755270	21755350	1						0
ENSG00000104904 #or# ENSG00000273734	AC005258.1	ornithine decarboxylase antizyme 1 #or# NA	10.0328	2.0122	1.27328	0.000476984	3.3215	2.31787	19	2340898	2341172		1					0
ENSG00000236972	FABP5P1	fatty acid binding protein 5 pseudogene 1	27.404	5.5111	1.72492	1.73117e-08	7.76166	2.31397	13	73100575	73100985	1						0
ENSG00000250273	PSMC1P5	proteasome 26S subunit, ATPase 1 pseudogene 5	36.8047	7.40656	1.88012	4.15906e-12	11.381	2.31301	5	107195156	107195332	1						0
ENSG00000231741	AL353743.3	NA	27.1188	5.46464	1.7182	5.47895e-08	7.2613	2.3111	9	85936283	85936599		1					0
ENSG00000172974	AC007318.1	NA	215.42	43.4494	2.18073	2.58894e-53	52.5869	2.30975	2	65205108	65205988		1					0
ENSG00000224834	BTF3P9	basic transcription factor 3 pseudogene 9	159.535	32.1993	2.20841	7.86127e-44	43.1045	2.30877	1	227434064	227434346	1						0
ENSG00000213867	AL049830.1	NA	202.733	40.9272	2.19562	4.02188e-51	50.3956	2.30845	14	30821419	30821843		1					0
ENSG00000225695	HNRNPA1P35	heterogeneous nuclear ribonucleoprotein A1 pseudogene 35	60.8803	12.3352	2.00256	7.05923e-18	17.1512	2.30319	2	201063089	201064051	1						0
ENSG00000100344 #or# ENSG00000100347 /// ENSG00000100344	PNPLA3	patatin like phospholipase domain containing 3 /// patatin like phospholipase domain containing 3 #or# SAMM50 sorting and assembly machinery component	40.4193	8.22127	1.9167	4.12851e-12	11.3842	2.29761	22	43939336	43939393							1
ENSG00000223984	HNRNPRP1	heterogeneous nuclear ribonucleoprotein R pseudogene 1	16.9414	3.44718	1.51258	1.31064e-05	4.88252	2.29706	10	21624592	21626286	1						0
ENSG00000275924 /// ENSG00000130726 #or# ENSG00000275924	MIR6807	tripartite motif containing 28 #or# microRNA 6807 /// microRNA 6807	178.823	36.3974	2.18786	7.10551e-42	41.1484	2.29663	19	58550285	58550376				1			0
ENSG00000202198 #or# ENSG00000283293	RN7SK	NA #or# RNA, 7SK small nuclear	185.939	37.9748	1.72531	6.89179e-08	7.16167	2.29171	6	52995621	52995948							1
ENSG00000267185	PTP4A2P1	protein tyrosine phosphatase type IVA, member 2 pseudogene 1	19.9017	4.06622	1.56371	3.3964e-06	5.46898	2.29113	17	42533532	42534009	1						0
ENSG00000215221	UBA52P6	ubiquitin A-52 residue ribosomal protein fusion product 1 pseudogene 6	11.5124	2.35654	1.39296	8.2006e-05	4.08615	2.28844	9	22012155	22012536	1						0
ENSG00000135363	LMO2	LIM domain only 2	24.109	4.94193	1.73325	3.07225e-08	7.51254	2.28642	11	33869545	33869586							1
ENSG00000178125 /// ENSG00000121022 #or# ENSG00000178125	PPP1R42	COP9 signalosome subunit 5 #or# protein phosphatase 1 regulatory subunit 42 /// protein phosphatase 1 regulatory subunit 42	27.7347	5.68699	1.78252	5.73606e-09	8.24139	2.28596	8	67014525	67014592							1
ENSG00000226666	HSPA9P1	heat shock protein family A (Hsp70) member 9 pseudogene 1	69.7712	14.3223	2.05435	5.19543e-19	18.2844	2.28437	2	221961737	221963765	1						0
ENSG00000215086	NPM1P24	nucleophosmin 1 pseudogene 24	258.728	53.3156	2.19123	1.88724e-58	57.7242	2.27881	10	72917641	72918534	1						0
ENSG00000204253	HNRNPCP2	heterogeneous nuclear ribonucleoprotein C pseudogene 2	181.75	37.4818	2.14705	1.28764e-43	42.8902	2.27769	2	189923336	189924216	1						0
ENSG00000230457	PA2G4P4	proliferation-associated 2G4 pseudogene 4	279.772	57.7258	2.18597	1.01665e-64	63.9928	2.27697	3	156809551	156810732	1						0
ENSG00000283041 #or# ENSG00000284135	MIR3654	NA #or# microRNA 3654	1284.4	265.771	2.23426	5.44743e-173	172.264	2.27284	7	133034860	133034915				1			0
ENSG00000233229	CNOT7P1	CCR4-NOT transcription complex subunit 7 pseudogene 1	14.153	2.92974	1.43412	3.49344e-05	4.45675	2.27227	0	69937166	69938017	1						0
ENSG00000162643	WDR63	WD repeat domain 63	14.3584	2.98671	1.35211	0.000156231	3.80623	2.26526	1	85130122	85130181							1
ENSG00000120738	EGR1	early growth response 1	35.2947	7.35422	1.86248	1.46883e-10	9.83303	2.26281	5	138468082	138469315							1
ENSG00000251433	CCNHP1	cyclin H pseudogene 1	13.4795	2.81361	1.40583	7.45717e-05	4.12743	2.26027	4	181905790	181906467	1						0
ENSG00000236334	PPIAL4G	peptidylprolyl isomerase A like 4G	46.3085	9.68943	1.89142	7.89498e-14	13.1026	2.25679	1	148479824	148482757							1
ENSG00000242222	AC092989.1	NA	30.0669	6.32118	1.72912	7.05527e-09	8.15149	2.24991	3	135925891	135926167		1					0
ENSG00000250329	KDELC1P1	KDEL motif containing 1 pseudogene 1	10.3442	2.18004	1.26941	0.000395211	3.40317	2.2464	5	128109486	128110994	1						0
ENSG00000259179	UBE2CP4	ubiquitin conjugating enzyme E2 C pseudogene 4	22.2946	4.70505	1.60552	5.93122e-07	6.22686	2.24441	15	31420128	31420662	1						0
ENSG00000227177	AIMP1P2	aminoacyl tRNA synthetase complex interacting multifunctional protein 1 pseudogene 2	17.0749	3.60575	1.45053	2.27017e-05	4.64394	2.24351	1	172885947	172886258	1						0
ENSG00000260335	AC133555.4	NA	20.9131	4.4251	1.6085	1.03285e-06	5.98596	2.24062	16	29449521	29449625		1					0
ENSG00000223908	AC068657.1	NA	11.1473	2.36118	1.35079	0.00014397	3.84173	2.23911	5	160023740	160024045		1					0
ENSG00000216285	AC078819.1	NA	19.7722	4.18822	1.58126	1.3614e-06	5.86602	2.23907	12	104030779	104031543		1					0
ENSG00000273398 /// ENSG00000243667 #or# ENSG00000273398 /// ENSG00000221823 #or# ENSG00000273398	AC017083.3	NA /// WD repeat domain 92 #or# NA /// protein phosphatase 3 regulatory subunit B, alpha #or# NA	19.4678	4.13124	1.60517	1.53308e-06	5.81444	2.23645	2	68131238	68131445		1					0
ENSG00000248578	NPM1P21	nucleophosmin 1 pseudogene 21	29.725	6.31252	1.6597	6.08177e-08	7.21597	2.23539	8	56101199	56101813	1						0
ENSG00000240371	RPS4XP13	ribosomal protein S4X pseudogene 13	1261.39	268.094	2.15805	2.51208e-66	65.6	2.2342	11	57576292	57577080	1						0
ENSG00000214552	COPS8P2	COP9 signalosome subunit 8 pseudogene 2	23.6792	5.05002	1.65332	7.15801e-08	7.14521	2.22926	3	68145004	68145630	1						0
ENSG00000255734	HNRNPABP1	heterogeneous nuclear ribonucleoprotein A/B pseudogene 1	13.6848	2.92633	1.32101	0.000219192	3.65918	2.22541	12	10111738	10112471	1						0
ENSG00000225422	RBMS1P1	RNA binding motif single stranded interacting protein 1 pseudogene 1	35.9643	7.70104	1.77606	1.86764e-10	9.72871	2.22344	12	66234079	66235234	1						0
ENSG00000232203	SLC25A6P2	solute carrier family 25 member 6 pseudogene 2	69.5962	14.9299	1.97013	1.59659e-19	18.7968	2.22081	9	31253901	31254777	1						0
ENSG00000196154	S100A4	S100 calcium binding protein A4	32.3759	6.94825	1.76674	1.52006e-08	7.81814	2.2202	1	153543621	153543758							1
ENSG00000228168	HNRNPA1P21	heterogeneous nuclear ribonucleoprotein A1 pseudogene 21	14.1491	3.03782	1.38467	4.95506e-05	4.30495	2.2196	3	39334979	39335939	1						0
ENSG00000224114	AL591846.1	NA	49.9686	10.7317	1.90291	2.22524e-14	13.6526	2.21914	1	206695837	206696269		1					0
ENSG00000210112 /// ENSG00000198763 #or# ENSG00000210112	MT-TM	mitochondrially encoded tRNA methionine /// mitochondrially encoded NADH:ubiquinone oxidoreductase core subunit 2 #or# mitochondrially encoded tRNA methionine	78.8562	16.9467	1.97506	4.79267e-18	17.3194	2.21822	0	4402	4469						1	0
ENSG00000205663	FAM239B	family with sequence similarity 239 member B (non-protein coding)	29.5916	6.36363	1.72587	8.8736e-09	8.0519	2.21727	0	3905687	3906232							1
ENSG00000235044	PPIAP3	peptidylprolyl isomerase A pseudogene 3	16.8009	3.61503	1.50192	6.69968e-06	5.17395	2.21646	20	37530039	37530543	1						0
ENSG00000218748	DBIP1	diazepam binding inhibitor, acyl-CoA binding protein pseudogene 1	35.8844	7.74565	1.83462	6.42467e-11	10.1921	2.2119	6	79436908	79437167	1						0
ENSG00000233028	AC006970.2	NA	18.2996	3.95072	1.48698	5.21305e-06	5.28291	2.21163	7	56175634	56176412		1					0
ENSG00000251017	AC093677.1	NA	34.0083	7.35082	1.77564	5.60609e-10	9.25134	2.20991	4	74085995	74086672		1					0
ENSG00000236048	AC013470.3	NA	65.0613	14.0674	1.94116	5.17722e-16	15.2859	2.20944	7	12471352	12472545		1					0
ENSG00000121716	PILRB	paired immunoglobin-like type 2 receptor beta	15.659	3.38742	1.37459	8.8925e-05	4.05098	2.20873	7	100367378	100367398							1
ENSG00000230911	PPIHP1	peptidylprolyl isomerase H pseudogene 1	54.093	11.7022	1.88843	9.65641e-16	15.0152	2.20866	11	112029858	112030367	1						0
ENSG00000076662	ICAM3	intercellular adhesion molecule 3	59.7121	12.9223	1.9255	6.95138e-16	15.1579	2.20816	19	10338794	10339208							1
ENSG00000237828	PA2G4P1	proliferation-associated 2G4 pseudogene 1	87.6976	18.9973	1.98741	6.88515e-24	23.1621	2.20674	0	120868611	120869807	1						0
ENSG00000217241	CBX3P9	chromobox 3 pseudogene 9	71.2358	15.4414	1.98309	1.11651e-19	18.9521	2.20579	6	116453014	116453565	1						0
as__ENSG00000135521 #or# as__ENSG00000280148 /// as__ENSG00000135521 #or# as__ENSG00000257065 /// ENSG00000135521 #or# ENSG00000280148 /// ENSG00000135521 #or# ENSG00000257065 /// ENSG00000112419 #or# ENSG00000257065	AL049844.1	phosphatase and actin regulator 2 #or# NA /// LTV1 ribosome biogenesis factor #or# NA	22.4807	4.87753	1.60787	7.21767e-07	6.1416	2.20446	6	143844486	143844617		1					0
ENSG00000182921	CCDC75P1	coiled-coil domain containing 75 pseudogene 1	10.0439	2.18004	1.23661	0.000689459	3.16149	2.20389	3	73182501	73183291	1						0
ENSG00000206228	HNRNPA1P4	heterogeneous nuclear ribonucleoprotein A1 pseudogene 4	59.4917	12.9143	1.88577	2.32225e-16	15.6341	2.20372	8	82291624	82292379	1						0
ENSG00000233476	EEF1A1P6	eukaryotic translation elongation factor 1 alpha 1 pseudogene 6	1821.83	395.589	2.1779	8.40353e-211	210.076	2.20332	7	22510616	22511999	1						0
ENSG00000229251	HNRNPA1P8	heterogeneous nuclear ribonucleoprotein A1 pseudogene 8	35.4352	7.70104	1.74506	1.46846e-10	9.83314	2.20206	7	84983556	84984506	1						0
ENSG00000236565	HNRNPA3P5	heterogeneous nuclear ribonucleoprotein A3 pseudogene 5	49.0443	10.6732	1.83209	3.74505e-13	12.4265	2.20009	13	65787932	65788764	1						0
ENSG00000213453	FTH1P3	ferritin heavy chain 1 pseudogene 3	75.0171	16.3522	1.93542	8.23999e-20	19.0841	2.19774	2	27392784	27393367	1						0
ENSG00000260852	FBXL19-AS1	FBXL19 antisense RNA 1	20.0231	4.36936	1.57639	1.58037e-06	5.80124	2.19617	16	30919319	30923269							1
ENSG00000230953	AC099677.1	NA	33.1223	7.22944	1.77285	4.23213e-10	9.37344	2.19585	1	52920422	52920596		1					0
ENSG00000215905	AL590609.1	NA	34.967	7.64746	1.79512	3.30812e-10	9.48042	2.19294	1	24007881	24007965		1					0
ENSG00000081665	ZNF506	zinc finger protein 506	12.8707	2.81825	1.35747	0.000104279	3.9818	2.19121	19	19820255	19820666							1
ENSG00000264112	AC015813.1	NA	10.763	2.36118	1.30774	0.000286089	3.5435	2.18849	17	57989044	57989796		1					0
ENSG00000186197 /// ENSG00000186197 #or# ENSG00000244457	EDARADD	EDAR associated death domain #or# enolase 1 pseudogene 1 /// EDAR associated death domain	320.835	70.418	2.12268	1.28228e-73	72.892	2.18782	1	236502840	236502915							1
ENSG00000257043	AP006296.1	NA	59.1296	12.9808	1.93637	4.19055e-16	15.3777	2.1875	11	18665050	18665548		1					0
ENSG00000225528	Z82206.1	NA	50.8091	11.1962	1.93162	3.96361e-14	13.4019	2.18207	22	39964570	39964718		1					0
ENSG00000111913	RIPOR2	RHO family interacting cell polarization regulator 2	13.5594	2.99011	1.40292	8.12506e-05	4.09017	2.18102	6	25014952	25015583							1
ENSG00000169403	PTAFR	platelet activating factor receptor	17.1508	3.78689	1.48717	1.9435e-05	4.71142	2.17919	1	28149673	28149992							1
ENSG00000226284	ARPC3P1	actin related protein 2/3 complex subunit 3 pseudogene 1	25.0678	5.56283	1.60111	2.4487e-07	6.61107	2.17195	20	49134480	49135012	1						0
ENSG00000180448	ARHGAP45	Rho GTPase activating protein 45	43.9722	9.76249	1.8662	1.18911e-12	11.9248	2.17127	19	1085660	1086628							1
ENSG00000210195	MT-TT	mitochondrially encoded tRNA threonine	58.7917	13.0979	1.36959	9.80859e-05	4.00839	2.16628	0	15888	15953						1	0
ENSG00000141526	SLC16A3	solute carrier family 16 member 3	25.7525	5.74335	1.65205	1.32921e-07	6.87641	2.16475	17	82261096	82261129							1
ENSG00000176463	SLCO3A1	solute carrier organic anion transporter family member 3A1	11.0674	2.46865	1.25463	0.000572846	3.24196	2.16452	15	92170872	92172435							1
ENSG00000142347	MYO1F	myosin IF	46.4491	10.384	1.81117	9.58901e-12	11.0182	2.16129	19	8576442	8577442							1
ENSG00000234819	AL353705.4	NA	22.8043	5.10638	1.55953	3.70066e-07	6.43172	2.15893	9	78219120	78219357		1					0
ENSG00000106829 #or# ENSG00000240979	AL353813.1	transducin like enhancer of split 4 #or# NA	17.9649	4.02378	1.51908	4.92089e-06	5.30796	2.15856	9	79726069	79726321		1					0
ENSG00000258741	H2AFVP1	H2A histone family member V pseudogene 1	52.5749	11.8178	1.85822	1.51596e-14	13.8193	2.15342	15	92733823	92734195	1						0
ENSG00000104774	MAN2B1	mannosidase alpha class 2B member 1	13.2742	2.9861	1.36081	8.25043e-05	4.08352	2.15229	19	12665246	12665525							1
ENSG00000226608	FTLP3	ferritin light chain pseudogene 3	382.073	85.9664	2.09543	1.00586e-79	78.9975	2.15201	20	4023917	4024444	1						0
ENSG00000101546 #or# ENSG00000267127 /// ENSG00000261126 #or# ENSG00000267127 /// ENSG00000267127	AC090360.1	ribosome binding factor A #or# NA /// NA /// RBFA downstream neighbor (non-protein coding) #or# NA	14.7801	3.33106	1.3653	8.21382e-05	4.08545	2.1496	18	80095288	80095457		1					0
ENSG00000115232	ITGA4	integrin subunit alpha 4	30.7941	6.94145	1.6825	1.40385e-08	7.85268	2.14935	2	181524171	181524365							1
ENSG00000214203	RPS4XP1	ribosomal protein S4X pseudogene 1	108.471	24.4635	2.00379	1.63549e-27	26.7864	2.14861	12	100009052	100009838	1						0
ENSG00000234297	AL592293.2	NA	77.1815	17.4177	1.90923	3.27804e-17	16.4844	2.1477	9	15055057	15056052		1					0
ENSG00000213673	SLC25A5P3	solute carrier family 25 member 5 pseudogene 3	12.6653	2.86472	1.29265	0.000317947	3.49765	2.14442	7	54419444	54420328	1						0
ENSG00000205413	SAMD9	sterile alpha motif domain containing 9	22.7396	5.16212	1.5486	1.10769e-06	5.95558	2.13917	7	93106098	93106105							1
ENSG00000232187	FTH1P7	ferritin heavy chain 1 pseudogene 7	144.226	32.9824	1.97864	8.35325e-33	32.0781	2.12856	13	22696023	22696574	1						0
ENSG00000214998	CCNB2P1	cyclin B2 pseudogene 1	47.3967	10.8503	1.77639	6.22796e-13	12.2057	2.12705	7	7909300	7910449	1						0
ENSG00000253346	AC109329.1	NA	10.2836	2.35716	1.22264	0.000680498	3.16717	2.12522	8	30331961	30332277		1					0
ENSG00000230584	CCT5P2	chaperonin containing TCP1 subunit 5 pseudogene 2	62.2	14.2944	1.89172	5.92597e-16	15.2272	2.12146	13	78908919	78910542	1						0
ENSG00000241923	RPL14P3	ribosomal protein L14 pseudogene 3	24.9878	5.7486	1.58413	1.83089e-07	6.73734	2.11994	4	140366240	140366861	1						0
ENSG00000231799	PA2G4P6	proliferation-associated 2G4 pseudogene 6	93.5233	21.5332	1.96048	1.70169e-22	21.7691	2.11877	9	89449558	89450754	1						0
ENSG00000224415	AC007683.1	NA	104.967	24.1721	1.94833	5.78414e-27	26.2378	2.11852	7	103141349	103141939		1					0
ENSG00000227105	PARP1P1	poly(ADP-ribose) polymerase 1 pseudogene 1	66.107	15.2284	1.87165	3.5746e-16	15.4468	2.11804	13	110936759	110939784	1						0
ENSG00000258895	AC104390.1	NA	23.3676	5.39498	1.51971	1.11319e-06	5.95343	2.11482	15	94033658	94034177		1					0
ENSG00000220583	RPL35P2	ribosomal protein L35 pseudogene 2	1215.21	281.147	2.08102	5.7316e-162	161.242	2.11181	6	34263311	34263673	1						0
ENSG00000165194	PCDH19	protocadherin 19	12.3953	2.86997	1.25969	0.000396945	3.40127	2.11069	0	100350662	100350704							1
ENSG00000183171	BX322650.1	NA	26.3653	6.14406	1.62433	5.44482e-08	7.26402	2.10138	0	150114378	150116520		1					0
ENSG00000241429	EEF1A1P25	eukaryotic translation elongation factor 1 alpha 1 pseudogene 25	264.404	61.806	2.01503	3.4944e-58	57.4566	2.09692	3	138825063	138826329	1						0
ENSG00000233328	PFN1P1	profilin 1 pseudogene 1	498.419	116.755	1.94468	4.17968e-27	26.3789	2.09388	1	171670517	171670939	1						0
ENSG00000206567	AC022007.1	NA	22.4696	5.28813	1.48961	3.1513e-06	5.50151	2.08714	3	10009888	10010402		1					0
ENSG00000227173	MYL6P3	myosin light chain 6 pseudogene 3	178.28	41.9931	1.94466	4.71973e-36	35.3261	2.08592	10	65169438	65169869	1						0
ENSG00000258159	IMMP1LP2	inner mitochondrial membrane peptidase subunit 1 pseudogene 2	10.1885	2.40363	1.18274	0.00116406	2.93403	2.08366	12	113015607	113016098	1						0
ENSG00000213888	LINC01521	long intergenic non-protein coding RNA 1521	11.6722	2.75725	1.27621	0.000376493	3.42424	2.08178	22	31346886	31347406			1				0
ENSG00000217648	AL136116.3	NA	11.1321	2.63186	1.23344	0.000534304	3.27221	2.08058	6	143342246	143343383		1					0
ENSG00000250672	AC010343.2	NA	13.795	3.2747	1.34701	9.0603e-05	4.04286	2.07471	5	33090126	33090349		1					0
ENSG00000233057	EEF1A1P14	eukaryotic translation elongation factor 1 alpha 1 pseudogene 14	23.9077	5.67895	1.52665	1.33801e-06	5.87354	2.07378	1	194188967	194190342	1						0
ENSG00000243679	AC018638.5	NA	11.5771	2.75262	1.29055	0.000247235	3.60689	2.0724	7	128653969	128654722		1					0
ENSG00000260103	AC012435.1	NA	34.7657	8.27578	1.75466	4.91655e-10	9.30834	2.0707	15	74481025	74481130		1					0
ENSG00000248923	MTND5P11	mitochondrially encoded NADH:ubiquinone oxidoreductase core subunit 5 pseudogene 11	21.4197	5.10576	1.47944	6.33164e-06	5.19848	2.06874	5	134924648	134926459	1						0
ENSG00000234241	AL109618.1	NA	43.4362	10.3939	1.71006	1.81718e-11	10.7406	2.06316	20	6213699	6215381		1					0
ENSG00000155629	PIK3AP1	phosphoinositide-3-kinase adaptor protein 1	30.1509	7.22542	1.61438	3.58738e-08	7.44522	2.06105	10	96628398	96628493							1
ENSG00000249264	EEF1A1P9	eukaryotic translation elongation factor 1 alpha 1 pseudogene 9	262.998	63.0419	1.9781	1.14497e-57	56.9412	2.06067	4	105484698	105486080	1						0
ENSG00000225580	AL358942.1	NA	27.7044	6.65687	1.61325	3.23403e-08	7.49026	2.0572	6	112616703	112617880		1					0
ENSG00000172738	TMEM217	transmembrane protein 217	10.6831	2.57611	1.14418	0.00187053	2.72803	2.05206	6	37218170	37219041							1
ENSG00000215093	EEF1A1P29	eukaryotic translation elongation factor 1 alpha 1 pseudogene 29	124.126	30.1012	1.9187	1.19777e-29	28.9216	2.04391	0	86160264	86161359	1						0
ENSG00000230216	HSPB1P2	heat shock protein family B (small) member 1 pseudogene 2	78.2779	19.0041	1.87605	6.33362e-19	18.1983	2.04229	0	49233956	49234501	1						0
ENSG00000274272 /// ENSG00000205307 #or# ENSG00000274272	AC069281.2	NA /// Sin3A associated protein 25 #or# NA	15.3323	3.72651	1.37318	6.44218e-05	4.19097	2.04068	7	100572232	100572571		1					0
ENSG00000237719	Z95152.1	NA	46.3885	11.3062	1.73554	1.42239e-12	11.847	2.03665	6	36091991	36092646		1					0
ENSG00000212588	SNORA26	small nucleolar RNA, H/ACA box 26	10.3483	2.52501	1.15805	0.0014544	2.83732	2.03503	4	52713249	52713370					1		0
ENSG00000166012 #or# ENSG00000207112	SNORA25	TATA-box binding protein associated factor, RNA polymerase I subunit D #or# small nucleolar RNA, H/ACA box 25	11.0482	2.70151	1.23956	0.000551271	3.25863	2.03197	11	93730513	93730646					1		0
ENSG00000281028 #or# ENSG00000281501 /// ENSG00000038210 #or# ENSG00000281028	AC104662.2	phosphatidylinositol 4-kinase type 2 beta #or# NA /// NA #or# SEPSECS antisense RNA 1 (head to head)	10.318	2.52439	1.15999	0.00139389	2.85577	2.03115	4	25277188	25277306		1					0
ENSG00000231007	CDC20P1	cell division cycle 20 pseudogene 1	125.172	30.6645	1.90843	1.28091e-29	28.8925	2.02927	9	87011652	87013151	1						0
ENSG00000241537	AC134050.1	NA	29.5228	7.24335	1.5925	1.20869e-07	6.91769	2.0271	3	72772539	72773471		1					0
ENSG00000230204	FTH1P5	ferritin heavy chain 1 pseudogene 5	145.5	35.7218	1.88218	1.10294e-29	28.9574	2.02615	6	50912712	50913256	1						0
ENSG00000267741	UBE2L4	ubiquitin conjugating enzyme E2 L4 (pseudogene)	35.0399	8.60467	1.63462	1.14003e-09	8.94308	2.02581	19	9774497	9774960	1						0
ENSG00000228253 /// ENSG00000210156 #or# ENSG00000228253	MT-ATP8	mitochondrially encoded ATP synthase membrane subunit 8 /// mitochondrially encoded tRNA lysine #or# mitochondrially encoded ATP synthase membrane subunit 8	360.874	88.6682	1.43412	2.08699e-05	4.68048	2.02501	0	8570	8572						1	0
ENSG00000135678	CPM	carboxypeptidase M	30.3259	7.46292	1.59503	5.93434e-08	7.22663	2.02274	12	68957590	68957678							1
ENSG00000064300	NGFR	nerve growth factor receptor	22.774	5.62723	1.50981	1.52842e-06	5.81576	2.01689	17	49513010	49513372							1
ENSG00000163453	IGFBP7	insulin like growth factor binding protein 7	36.9149	9.12211	1.63053	6.31986e-09	8.19929	2.01676	4	57032038	57032414							1
ENSG00000137074 #or# ENSG00000225693 /// ENSG00000225693	LAGE3P1	aprataxin #or# L antigen family member 3 pseudogene 1 /// L antigen family member 3 pseudogene 1	64.9277	16.0648	1.72161	1.34664e-14	13.8707	2.01493	9	33019682	33020165	1						0
ENSG00000179967	PPP1R14BP3	protein phosphatase 1 regulatory inhibitor subunit 14B pseudogene 3	309.338	76.5594	1.94355	2.01339e-61	60.6961	2.01453	4	139114930	139115374	1						0
ENSG00000254132	MTND6P3	mitochondrially encoded NADH:ubiquinone oxidoreductase core subunit 6 pseudogene 3	13.4107	3.32179	1.22307	0.000671085	3.17322	2.01335	5	94568929	94569470	1						0
ENSG00000258016	HIGD1AP1	HIG1 hypoxia inducible domain family member 1A pseudogene 1	28.9717	7.17834	1.60072	2.79844e-08	7.55308	2.01292	12	53142053	53142327	1						0
ENSG00000126264	HCST	hematopoietic cell signal transducer	13.1559	3.27006	1.28666	0.000246759	3.60773	2.00832	19	35904161	35904270							1
ENSG00000228335	AC073063.1	NA	82.1352	20.4843	1.83965	5.5367e-18	17.2567	2.00348	7	99442890	99443496		1					0
ENSG00000005381	MPO	myeloperoxidase	229.083	0	5.62221	1.0065e-78	77.9972	?	17	58279876	58280014							1
ENSG00000114455	HHLA2	HERV-H LTR-associating 2	23.2645	0	3.0496	6.45478e-18	17.1901	?	3	108376612	108378285							1
ENSG00000264311	CCDC58P1	coiled-coil domain containing 58 pseudogene 1	12.1364	0	2.19217	2.27436e-09	8.64314	?	18	10623876	10624305	1						0
ENSG00000271503	CCL5	C-C motif chemokine ligand 5	48.1037	0	3.87248	5.56912e-32	31.2542	?	17	35872002	35872269							1
ENSG00000133048	CHI3L1	chitinase 3 like 1	23.9259	0	2.94742	1.36311e-16	15.8655	?	1	203179998	203180652							1
ENSG00000268734	AC245128.3	NA	10.3291	0	1.97122	4.72658e-08	7.32545	?	19	54890673	54891420		1					0
ENSG00000204379	XAGE1A	X antigen family member 1A	12.897	0	2.18526	2.6025e-09	8.58461	?	0	52500702	52500812							1
ENSG00000181381	DDX60L	DExD/H-box 60 like	11.1129	0	2.11925	7.50408e-09	8.1247	?	4	168489090	168489308							1
ENSG00000111348	ARHGDIB	Rho GDP dissociation inhibitor beta	136.93	0	4.52973	1.49537e-40	39.8252	?	12	14950713	14950724							1
ENSG00000101425 /// ENSG00000101425 #or# ENSG00000285144	BPI	bactericidal permeability increasing protein #or# NA /// bactericidal permeability increasing protein	14.0844	0	2.35361	1.33052e-10	9.87598	?	20	38337146	38337261							1
ENSG00000124491	F13A1	coagulation factor XIII A chain	10.2796	0	1.96115	8.96708e-08	7.04735	?	6	6305113	6305300							1
ENSG00000143546	S100A8	S100 calcium binding protein A8	68.2634	0	3.26544	2.67657e-19	18.5724	?	1	153390204	153390243							1
ENSG00000198848	CES1	carboxylesterase 1	46.4147	0	3.86368	2.63013e-31	30.58	?	16	55821429	55821521							1
ENSG00000140678	ITGAX	integrin subunit alpha X	15.2676	0	2.49581	6.88053e-12	11.1624	?	16	31372597	31372654							1
ENSG00000011600	TYROBP	TYRO protein tyrosine kinase binding protein	31.756	0	3.38934	3.40638e-22	21.4677	?	19	35907294	35907580							1
ENSG00000229391	HLA-DRB6	major histocompatibility complex, class II, DR beta 6 (pseudogene)	12.2467	0	2.22448	1.3029e-09	8.88509	?	6	32553046	32553072	1						0
ENSG00000167613	LAIR1	leukocyte associated immunoglobulin like receptor 1	17.6605	0	2.59494	9.703e-13	12.0131	?	19	54368189	54368700							1
ENSG00000185862 #or# ENSG00000265118 /// ENSG00000185862	EVI2B	ecotropic viral integration site 2B #or# NA /// ecotropic viral integration site 2B	17.5655	0	2.57801	1.17587e-12	11.9296	?	17	31304234	31304262							1
ENSG00000103490	PYCARD	PYD and CARD domain containing	14.4494	0	2.44307	2.32536e-11	10.6335	?	16	31202691	31203450							1
ENSG00000257764	AC020656.1	NA	67.4188	0	4.30075	5.65158e-41	40.2478	?	12	69353493	69353608		1					0
ENSG00000126860 #or# ENSG00000265118 /// ENSG00000126860	EVI2A	ecotropic viral integration site 2A /// ecotropic viral integration site 2A #or# NA	13.8901	0	2.39701	5.58333e-11	10.2531	?	17	31317560	31318302							1
ENSG00000165178	NCF1C	neutrophil cytosolic factor 1C pseudogene	20.4185	0	2.84332	1.42038e-15	14.8476	?	7	75156639	75156915	1						0
ENSG00000204472	AIF1	allograft inflammatory factor 1	17.8163	0	2.68584	1.47615e-13	12.8309	?	6	31616901	31617021							1
ENSG00000104055	TGM5	transglutaminase 5	23.1502	0	3.02565	2.01458e-17	16.6958	?	15	43239212	43239266							1
ENSG00000263648	AC005244.1	NA	11.4022	0	2.17112	3.21105e-09	8.49335	?	17	12115547	12115885		1					0
ENSG00000186652 #or# ENSG00000254979 /// ENSG00000134802 #or# ENSG00000254979	AP000781.2	solute carrier family 43 member 3 #or# NA /// proteoglycan 2, pro eosinophil major basic protein #or# NA	15.3131	0	2.508	5.2659e-12	11.2785	?	11	57389155	57389317		1					0
ENSG00000172232	AZU1	azurocidin 1	110.059	0	4.86062	1.59347e-55	54.7977	?	19	831878	832018							1
ENSG00000172236	TPSAB1	tryptase alpha/beta 1	15.568	0	2.50821	6.22256e-12	11.206	?	16	1242241	1242516							1
ENSG00000100448	CTSG	cathepsin G	251.49	0	4.84901	5.63874e-46	45.2488	?	14	24573556	24573636							1
ENSG00000104921	FCER2	Fc fragment of IgE receptor II	10.7286	0	2.06111	1.37515e-08	7.86165	?	19	7699761	7700084							1
ENSG00000151062	CACNA2D4	calcium voltage-gated channel auxiliary subunit alpha2delta 4	24.7138	0	3.06398	4.13699e-18	17.3833	?	12	1884030	1884321							1
ENSG00000204936	CD177	CD177 molecule	22.1915	0	2.94668	1.61435e-16	15.792	?	19	43362088	43362372							1
ENSG00000110852	CLEC2B	C-type lectin domain family 2 member B	15.7925	0	2.5208	5.33839e-12	11.2726	?	12	9856928	9857637							1
ENSG00000169385	RNASE2	ribonuclease A family member 2	92.8366	0	4.22731	4.19303e-35	34.3775	?	14	20956258	20956436							1
ENSG00000182487	NCF1B	neutrophil cytosolic factor 1B pseudogene	18.3604	0	2.73135	3.77743e-14	13.4228	?	7	73235662	73235787	1						0
ENSG00000163220	S100A9	S100 calcium binding protein A9	157.767	0	4.81189	3.94276e-48	47.4042	?	1	153360839	153361027							1
ENSG00000164821	DEFA4	defensin alpha 4	73.2626	0	3.84849	3.50142e-28	27.4558	?	8	6935822	6936019							1
ENSG00000164825	DEFB1	defensin beta 1	35.7317	0	3.43193	3.43597e-23	22.464	?	8	6870575	6870680							1
ENSG00000166927 #or# ENSG00000166928 /// ENSG00000166927	MS4A7	membrane spanning 4-domains A7 #or# membrane spanning 4-domains A14 /// membrane spanning 4-domains A7	12.102	0	2.20678	1.77681e-09	8.75036	?	11	60393787	60393977							1
ENSG00000197561	ELANE	elastase, neutrophil expressed	97.9723	0	4.20181	1.28855e-34	33.8899	?	19	856165	856242							1
ENSG00000138964	PARVG	parvin gamma	20.3922	0	2.85976	8.49275e-16	15.071	?	22	44219484	44219533							1
ENSG00000119535	CSF3R	colony stimulating factor 3 receptor	25.003	0	3.12102	3.27846e-19	18.4843	?	1	36479497	36479516							1
ENSG00000198771	RCSD1	RCSD domain containing 1	12.2123	0	2.19257	2.27063e-09	8.64385	?	1	167641391	167641741							1
ENSG00000137462	TLR2	toll like receptor 2	11.1281	0	2.10143	1.02832e-08	7.98787	?	4	153704851	153705259							1
ENSG00000043462	LCP2	lymphocyte cytosolic protein 2	14.9288	0	2.41009	4.61684e-11	10.3357	?	5	170287717	170288016							1
ENSG00000104518	GSDMD	gasdermin D	13.8901	0	2.39166	4.74433e-11	10.3238	?	8	143562670	143563062							1
ENSG00000228695	CES1P1	carboxylesterase 1 pseudogene 1	13.8254	0	2.32872	2.13077e-10	9.67146	?	16	55793777	55793960	1						0
ENSG00000204382	XAGE1B	X antigen family member 1B	12.9314	0	2.25082	8.43007e-10	9.07417	?	0	52515168	52515573							1
ENSG00000104043	ATP8B4	ATPase phospholipid transporting 8B4 (putative)	16.4964	0	2.59072	8.78299e-13	12.0564	?	15	50106967	50107008							1
ENSG00000166801	FAM111A	family with sequence similarity 111 member A	12.1668	0	2.23053	1.17529e-09	8.92986	?	11	59153505	59155036							1
ENSG00000258982	AL133523.1	NA	12.7412	0	2.20258	9.40842e-10	9.02648	?	14	100207407	100207652		1					0
ENSG00000167851	CD300A	CD300a molecule	12.6198	0	2.18052	2.41192e-09	8.61764	?	17	74484127	74484296							1
ENSG00000182162	P2RY8	P2Y receptor family member 8	13.9397	0	2.36992	9.6953e-11	10.0134	?	0	1466559	1466582							1
ENSG00000182557	SPNS3	sphingolipid transporter 3 (putative)	10.0591	0	1.97405	5.95918e-08	7.22481	?	17	4487806	4487862							1
ENSG00000100365	NCF4	neutrophil cytosolic factor 4	23.1502	0	2.98776	4.37938e-17	16.3586	?	22	36877628	36877764							1
ENSG00000256804	AC138466.2	NA	16.8575	0	2.54641	2.36852e-12	11.6255	?	12	132126461	132126764		1					0
ENSG00000170627	GTSF1	gametocyte specific factor 1	22.8802	0	3.04199	2.0977e-17	16.6783	?	12	54468925	54468953							1
ENSG00000110934	BIN2	bridging integrator 2	18.056	0	2.69482	8.90693e-14	13.0503	?	12	51322748	51323088							1
ENSG00000112799	LY86	lymphocyte antigen 86	14.6891	0	2.46847	1.5689e-11	10.8044	?	6	6654628	6654631							1
ENSG00000158517	NCF1	neutrophil cytosolic factor 1	23.5194	0	3.04941	1.10196e-17	16.9578	?	7	74785182	74785546							1
ENSG00000258136	AC007622.2	NA	2.57191	10.3317	-1.1405	0.00167689	2.7755	-2.00616	12	107759772	107759968		1					0
ENSG00000213183	RPS7P8	ribosomal protein S7 pseudogene 8	48.2908	194.593	-1.90025	2.588e-32	31.587	-2.01064	6	96648489	96649069	1						0
ENSG00000209082 /// ENSG00000209082 #or# ENSG00000210082	MT-TL1	mitochondrially encoded tRNA leucine 1 (UUA/G) #or# mitochondrially encoded 16S RNA /// mitochondrially encoded tRNA leucine 1 (UUA/G)	109.437	445.024	-1.77165	1.0619e-12	11.9739	-2.02378	0	3230	3304						1	0
ENSG00000210164 /// ENSG00000198938 #or# ENSG00000210164 /// ENSG00000198840 #or# ENSG00000210164	MT-TG	mitochondrially encoded cytochrome c oxidase III #or# mitochondrially encoded tRNA glycine /// mitochondrially encoded NADH:ubiquinone oxidoreductase core subunit 3 #or# mitochondrially encoded tRNA glycine /// mitochondrially encoded tRNA glycine	235.264	963.526	-1.87331	2.33895e-20	19.631	-2.03404	0	9991	10058						1	0
ENSG00000213397	HAUS7	HAUS augmin like complex subunit 7	11.9119	50.1477	-1.72835	5.72218e-11	10.2424	-2.07378	0	153470558	153470587							1
ENSG00000241411	AC104619.1	NA	223.371	944.263	-2.04298	1.72044e-130	129.764	-2.07975	4	134952259	134952889		1					0
ENSG00000226499	AL136380.1	NA	10.8772	46.244	-1.75714	1.5501e-10	9.80964	-2.08795	1	44843921	44844082		1					0
ENSG00000155660	PDIA4	protein disulfide isomerase family A member 4	1180.66	5020.02	-2.07372	4.41431e-278	277.355	-2.08809	7	149028409	149028468							1
ENSG00000230564	CALM1P2	calmodulin 1 pseudogene 2	17.0517	72.7966	-1.83961	5.16983e-15	14.2865	-2.09396	7	55259809	55260256	1						0
ENSG00000280009	AC020923.1	NA	7.55185	32.247	-1.6143	1.10764e-07	6.9556	-2.09426	5	86305233	86306149		1					0
ENSG00000225405	RPS15AP17	ribosomal protein S15a pseudogene 17	160.692	689.747	-1.97882	2.0726e-29	28.6835	-2.10177	4	62105660	62106049	1						0
ENSG00000215450	AL022342.1	NA	10.1885	43.9241	-1.72668	1.19256e-09	8.92352	-2.10807	20	47160838	47161700		1					0
ENSG00000079337	RAPGEF3	Rap guanine nucleotide exchange factor 3	2.95218	12.7399	-1.21221	0.000571257	3.24317	-2.1095	12	47752562	47752812							1
ENSG00000270916	RPL12P50	ribosomal protein L12 pseudogene 50	2.4273	10.5041	-1.16164	0.00142287	2.84684	-2.11354	0	151023607	151023722	1						0
ENSG00000234277 #or# ENSG00000242757 /// ENSG00000234277	LINC01641	long intergenic non-protein coding RNA 1641 /// long intergenic non-protein coding RNA 1641 #or# NA	16.5308	72.9124	-1.92477	2.77813e-15	14.5562	-2.14101	1	227425756	227426057			1				0
ENSG00000269888	AC112491.1	NA	32.9928	146.245	-1.85382	4.64014e-13	12.3335	-2.14816	3	161429464	161429613		1					0
ENSG00000242052	RPL10P7	ribosomal protein L10 pseudogene 7	3.28695	14.5988	-1.28999	0.00027539	3.56005	-2.15103	3	119635526	119636150	1						0
ENSG00000220130	AL079342.1	NA	25.3874	113.611	-1.95592	4.40561e-20	19.356	-2.16192	6	89001548	89001814		1					0
ENSG00000253945	AC024995.1	NA	436.507	1956.83	-2.13294	3.56718e-143	142.448	-2.16444	8	95403802	95403894		1					0
ENSG00000244422	RPL38P3	ribosomal protein L38 pseudogene 3	704.46	3178.89	-2.15414	1.79377e-251	250.746	-2.17393	4	54976159	54976371	1						0
ENSG00000228331	RPL17P43	ribosomal protein L17 pseudogene 43	233.167	1057.13	-2.14504	4.56974e-145	144.34	-2.18071	17	19496943	19497528	1						0
ENSG00000230837	RPL31P2	ribosomal protein L31 pseudogene 2	1003.56	4552.97	-2.16664	7.74452e-298	297.111	-2.18167	20	33752167	33752543	1						0
ENSG00000230734	RPL10P3	ribosomal protein L10 pseudogene 3	243.744	1114.25	-2.16757	1.35541e-151	150.868	-2.19264	9	117180628	117181095	1						0
ENSG00000213621	RPSAP54	ribosomal protein SA pseudogene 54	149.106	682.858	-2.15438	7.85223e-98	97.105	-2.19525	13	20961310	20962195	1						0
ENSG00000128228	SDF2L1	stromal cell derived factor 2 like 1	447.295	2050.76	-2.17797	2.46282e-215	214.609	-2.19686	22	21642862	21643292							1
ENSG00000111641	NOP2	NOP2 nucleolar protein	6.0682	27.9405	-1.65374	2.20062e-07	6.65746	-2.20302	12	6567500	6567922							1
ENSG00000070756 #or# ENSG00000284570	MIR7705	poly(A) binding protein cytoplasmic 1 #or# microRNA 7705	833.345	3840.92	-2.17767	2.67638e-169	168.572	-2.20446	8	100702968	100703024				1			0
ENSG00000238172	RPS2P35	ribosomal protein S2 pseudogene 35	179.775	829.739	-2.17602	6.816e-125	124.166	-2.20647	9	100116755	100117651	1						0
ENSG00000242640	RPS29P11	ribosomal protein S29 pseudogene 11	138.735	643.997	-2.16331	1.82827e-91	90.738	-2.21472	4	25678850	25679020	1						0
ENSG00000051108 #or# ENSG00000261270 /// ENSG00000051108	HERPUD1	homocysteine inducible ER protein with ubiquitin like domain 1 /// homocysteine inducible ER protein with ubiquitin like domain 1 #or# NA	223.021	1042.01	-2.18498	2.34607e-130	129.63	-2.22412	16	56943126	56943407							1
ENSG00000242405	AC007537.2	NA	11.387	53.567	-1.88573	1.2367e-11	10.9077	-2.23396	12	12155262	12155772		1					0
ENSG00000225918	RPL7P59	ribosomal protein L7 pseudogene 59	45.9737	216.297	-2.12807	4.93202e-39	38.307	-2.23413	7	145039999	145040941	1						0
ENSG00000106948	AKNA	AT-hook transcription factor	19.928	93.964	-2.01955	5.967e-21	20.2242	-2.23731	9	114359087	114359589							1
ENSG00000267023	LRRC37A16P	leucine rich repeat containing 37 member A16, pseudogene	25.9163	122.538	-2.06625	2.20624e-24	23.6563	-2.2413	17	68130250	68130322	1						0
ENSG00000141756	FKBP10	FK506 binding protein 10	239.193	1139.3	-1.79933	1.38542e-09	8.85842	-2.2519	17	41822223	41822540							1
ENSG00000230364	RPL4P3	ribosomal protein L4 pseudogene 3	157.529	752.121	-2.20548	2.45013e-110	109.611	-2.25535	1	171683128	171684438	1						0
ENSG00000242060	RPS3AP49	ribosomal protein S3a pseudogene 49	85.32	410.763	-2.19857	2.43424e-63	62.6136	-2.26735	18	60149576	60150365	1						0
ENSG00000274319	RPSAP73	ribosomal protein SA pseudogene 73	2.20275	10.6779	-1.22243	0.000730213	3.13655	-2.27725	7	6365441	6365770	1						0
ENSG00000256618	MTRNR2L1	MT-RNR2 like 1	4.43989	21.8109	-1.64024	1.87452e-06	5.72711	-2.29646	17	22524137	22524663							1
ENSG00000213741	RPS29	ribosomal protein S29	2132.64	10521.6	-2.2709	3.26569e-156	155.486	-2.30264	14	49597475	49599164							1
ENSG00000182916	TCEAL7	transcription elongation factor A like 7	4.26494	21.1198	-1.57174	3.5968e-06	5.44408	-2.308	0	103331707	103332088							1
ENSG00000186010	NDUFA13	NADH:ubiquinone oxidoreductase subunit A13	52.2624	263.012	-2.23431	9.02112e-51	50.0447	-2.33128	19	19528007	19528195		1					0
ENSG00000231989	PPP1R2B	PPP1R2 family member B	2.58708	13.3258	-1.3243	0.000145717	3.83649	-2.36483	5	156851181	156852528							1
ENSG00000267757	EML2-AS1	EML2 antisense RNA 1	12.7948	66.1367	-2.04301	1.84501e-16	15.734	-2.36989	19	45642225	45642840							1
ENSG00000253746	AC091182.2	NA	2.58708	13.3781	-1.3628	0.000125675	3.90075	-2.37048	8	37405439	37405987		1					0
ENSG00000233016 #or# ENSG00000280496 /// ENSG00000233016 /// ENSG00000233016 #or# ENSG00000274998 #or# ENSG00000281808 /// ENSG00000233016 #or# ENSG00000276161 #or# ENSG00000280496	SNHG7	small nucleolar RNA host gene 7 #or# small nucleolar RNA, H/ACA box 17B #or# small nucleolar RNA, H/ACA box 17B /// small nucleolar RNA host gene 7 #or# small nucleolar RNA, H/ACA box 17A #or# NA /// small nucleolar RNA host gene 7 /// small nucleolar RNA host gene 7 #or# small nucleolar RNA, H/ACA box 17B	422.801	2195.17	-2.35467	8.84374e-246	245.053	-2.37628	9	136725234	136727086							1
ENSG00000115274	INO80B	INO80 complex subunit B	6.46769	33.9737	-1.85528	1.00323e-09	8.9986	-2.39309	2	74457334	74457540							1
ENSG00000080224	EPHA6	EPH receptor A6	4.61488	24.3093	-1.59727	8.61176e-07	6.06491	-2.39714	3	97752189	97752460							1
ENSG00000273416	AL732292.2	NA	2.25231	11.8787	-1.32025	0.000234435	3.62998	-2.39891	1	235104180	235104609		1					0
ENSG00000225475	AC099789.1	NA	116.57	642.537	-2.39809	1.16061e-99	98.9353	-2.46258	1	56619409	56619549		1					0
ENSG00000215464	AP000354.1	NA	4.70994	25.9762	-1.69064	1.71987e-07	6.7645	-2.46341	22	24269346	24269675		1					0
ENSG00000236844	AC069213.3	NA	6.37263	35.9406	-1.90258	3.94029e-10	9.40447	-2.49565	3	195554610	195555083		1					0
ENSG00000131899	LLGL1	LLGL1, scribble cell polarity complex component	28.7926	164.549	-2.3599	1.32785e-34	33.8769	-2.51475	17	18243908	18244875							1
ENSG00000242114	MTFP1	mitochondrial fission process 1	10.6679	65.5051	-2.16711	4.18587e-16	15.3782	-2.61833	22	30428535	30428951							1
ENSG00000175197	DDIT3	DNA damage inducible transcript 3	51.9276	320.664	-2.50616	1.34026e-64	63.8728	-2.62649	12	57517476	57517542							1
ENSG00000255114	AP003392.3	NA	3.03207	19.4992	-1.56035	7.35138e-06	5.13363	-2.68504	11	119045385	119045493		1					0
ENSG00000210077 #or# ENSG00000210082 /// ENSG00000210077 #or# ENSG00000211459 /// ENSG00000210077	MT-TV	mitochondrially encoded tRNA valine #or# mitochondrially encoded 16S RNA /// mitochondrially encoded tRNA valine /// mitochondrially encoded tRNA valine #or# mitochondrially encoded 12S RNA	27.1795	177.268	-2.1252	8.1787e-12	11.0873	-2.70534	0	1602	1670						1	0
ENSG00000229887	HNRNPA1P6	heterogeneous nuclear ribonucleoprotein A1 pseudogene 6	2.55674	17.2824	-1.60546	2.30538e-06	5.63726	-2.75692	1	58048175	58049291	1						0
ENSG00000240771	ARHGEF25	Rho guanine nucleotide exchange factor 25	11.6681	79.0667	-2.36536	1.56463e-21	20.8056	-2.7605	12	57619311	57619379							1
ENSG00000219222	RPL12P47	ribosomal protein L12 pseudogene 47	55.7931	387.106	-2.68182	1.70425e-75	74.7685	-2.79457	6	43310231	43310357	1						0
ENSG00000237170	RPS7P15	ribosomal protein S7 pseudogene 15	31.5203	220.998	-2.62869	5.5622e-47	46.2548	-2.80968	4	4507249	4507777	1						0
ENSG00000213988	ZNF90	zinc finger protein 90	6.45252	46.62	-2.23928	2.03819e-14	13.6908	-2.85301	19	20125006	20125143							1
ENSG00000213291	AC010099.1	NA	18.9237	138.721	-2.60234	7.534e-34	33.123	-2.87392	7	125300504	125300878		1					0
ENSG00000226558 /// ENSG00000179157 #or# ENSG00000226558	AL590383.1	NA /// ribosomal protein S2 pseudogene 28 #or# NA	2.18758	16.7179	-1.70385	1.58179e-06	5.80085	-2.93398	6	43364220	43364294		1					0
ENSG00000220370	AL078595.1	NA	5.70309	43.8875	-2.23673	6.03107e-14	13.2196	-2.94399	6	94344737	94344962		1					0
ENSG00000267130 /// ENSG00000267130 #or# ENSG00000267296	AC008738.2	NA /// NA #or# CEBPA divergent transcript	1.21365	11.0389	-1.3884	0.000107808	3.96735	-3.18517	19	33309280	33309387		1					0
ENSG00000260109	AC135628.1	NA	1.59797	16.6296	-1.78748	5.04861e-07	6.29683	-3.37944	15	67986027	67986288		1					0
ENSG00000099958	DERL3	derlin 3	62.6491	725.6	-3.41919	7.76718e-151	150.11	-3.53381	22	23836767	23837154							1
ENSG00000173110	HSPA6	heat shock protein family A (Hsp70) member 6	20.3082	251.085	-3.51872	1.21424e-59	58.9157	-3.62804	1	161526591	161526910							1
ENSG00000174951	FUT1	fucosyltransferase 1 (H blood group)	0.829321	11.0302	-1.52528	2.31723e-05	4.63503	-3.73339	19	48752612	48753122							1
ENSG00000129910	CDH15	cadherin 15	1.35826	18.0671	-1.95566	1.48277e-08	7.82893	-3.73353	16	89195156	89195492							1
ENSG00000259803	SLC22A31	solute carrier family 22 member 31	6.30791	86.6426	-2.95438	4.84978e-29	28.3143	-3.77984	16	89199412	89199655							1
ENSG00000225400	RAB28P5	RAB28, member RAS oncogene family pseudogene 5	1.22882	18.1355	-1.96667	1.71531e-08	7.76566	-3.88348	0	136847384	136848034	1						0
ENSG00000177352	CCDC71	coiled-coil domain containing 71	3.94534	108.021	-3.65586	1.9967e-39	38.6997	-4.77502	3	49162535	49162804							1
