# Supplementary material for: The role of reciprocal fusions in MLL-r acute leukemia: studying the chromosomal translocation t(6;11)
Source: Oncogene. 2021 Aug 5;40(40):5902–12. doi: 10.1038/s41388-021-01983-3 (PMC8497272; doi:10.1038/s41388-021-01983-3)
Supplement: Supplementary file 8 — ATAC-Seq MLL-AF6 [file 41388_2021_1983_MOESM8_ESM.xlsx]

## Sheet: Sheet1
ID	gene symbol	gene	mean exp	mean mock	log2	pvalue	var-log2	chrom	begin	end	PG	NA	LINC	MIR	SNO	MT	PCG
ENSG00000183632	TP53TG3	TP53 target 3	5.15976	0.264599	4.15764	0.0041633	4.28542	16	32673528	32676732							1
ENSG00000264257	KIR3DP1	NA #or# killer cell immunoglobulin like receptor, three Ig domains pseudogene 1 /// killer cell immunoglobulin like receptor, three Ig domains pseudogene 1	5.66011	0.324458	4.29551	0.00802206	4.12473	19	54786355	54790318	1						0
ENSG00000156575	PRG3	proteoglycan 3, pro eosinophil major basic protein 2	3.71555	0.226893	3.67321	0.0107198	4.03349	11	57376769	57381150							1
ENSG00000253111	AC091114.1		3.62658	0.226893	3.6502	0.0113105	3.99852	8	125466939	125541373		1					0
ENSG00000248400	ST13P12	ST13, Hsp70 interacting protein pseudogene 12	4.21289	0.264599	3.89778	0.0115225	3.99293	5	82968888	82977153	1						0
ENSG00000243107	AC000120.1		4.06707	0.264599	3.84186	0.00648867	3.94211	7	92200014	92206857		1					0
ENSG00000277876	AC108359.1		4.044	0.264599	3.76422	0.0192958	3.9339	0	30821815	30823407		1					0
ENSG00000268336	SIGLEC20P	sialic acid binding Ig like lectin 20, pseudogene	3.29045	0.226893	3.46161	0.0232305	3.8582	19	51184905	51190809	1						0
ENSG00000261780	LINC02582	long intergenic non-protein coding RNA 2582	3.22757	0.226893	3.49512	0.0288522	3.83036	18	73324941	73349878			1				0
ENSG00000258869	LINC02312	long intergenic non-protein coding RNA 2312	3.71555	0.264599	3.67623	0.0172314	3.81169	14	97749264	97763989			1				0
ENSG00000164334	FAM170A	family with sequence similarity 170 member A	3.14161	0.226893	3.41583	0.0216269	3.79142	5	119629559	119635822							1
ENSG00000224071	AC009474.1		3.12321	0.226893	3.46655	0.0274003	3.78295	2	66820684	66822570		1					0
ENSG00000256771	ZNF253	zinc finger protein 253	3.08475	0.226893	3.3482	0.0296449	3.76507	19	19865886	19894674							1
ENSG00000225672	CCNT2P1	cyclin T2 pseudogene 1	3.08174	0.226893	3.40691	0.0446479	3.76366	1	111007700	111015530	1						0
ENSG00000266729	DSG1-AS1	DSG1 antisense RNA 1	4.31725	0.324458	3.93324	0.00494013	3.73401	18	31343368	31426988							1
ENSG00000167360	OR51Q1	olfactory receptor family 51 subfamily Q member 1 (gene/pseudogene)	3.48076	0.264599	3.57388	0.0345364	3.71752	11	5422111	5423206	1						0
ENSG00000233115	FAM90A11P	family with sequence similarity 90 member A11, pseudogene	2.9804	0.226893	3.31326	0.0282835	3.71542	8	8011782	8017011	1						0
ENSG00000196381	ZNF781	ZFP30 zinc finger protein #or# zinc finger protein 781 /// zinc finger protein 781 /// ZFP30 zinc finger protein #or# zinc finger protein 781 #or# NA	2.9804	0.226893	3.30786	0.0249929	3.71542	19	37667751	37692322							1
ENSG00000232551	MTCO1P14	mitochondrially encoded cytochrome c oxidase I pseudogene 14	2.97739	0.226893	3.37813	0.0182701	3.71396	1	106804474	106806032	1						0
ENSG00000284670	AC092128.1		2.93592	0.226893	3.31291	0.0491	3.69373	16	73940639	73941781		1					0
ENSG00000224539	SAGE4P	sarcoma antigen 4, pseudogene	3.42089	0.264599	3.5521	0.0176633	3.69249	0	135598927	135615431	1						0
ENSG00000260765	CES1P2	carboxylesterase 1 pseudogene 2	2.83458	0.226893	3.22164	0.0490112	3.64305	16	55728115	55750111	1						0
ENSG00000252129	RF00090		2.83156	0.226893	3.26891	0.0310632	3.64151	17	15574019	15574198		1					0
ENSG00000203923	SPANXN1	SPANX family member N1	2.83156	0.226893	3.27551	0.0493958	3.64151	0	145246828	145256112							1
ENSG00000253967	AC022730.4		2.81618	0.226893	3.26884	0.0287269	3.63365	8	70471134	70485687		1					0
ENSG00000238087	FMO8P	flavin containing monooxygenase 8 pseudogene	2.77169	0.226893	3.25521	0.0354385	3.61068	1	166566178	166580705	1						0
ENSG00000216904	SOCS5P5	suppressor of cytokine signaling 5 pseudogene 5	2.77169	0.226893	3.2547	0.0324626	3.61068	6	113222166	113224072	1						0
ENSG00000008197	TFAP2D	transcription factor AP-2 delta	3.23058	0.264599	3.45145	0.028547	3.60991	6	50713828	50772988							1
ENSG00000259977	AL121578.3		3.23058	0.264599	3.42588	0.0124877	3.60991	0	37906147	37949405		1					0
ENSG00000124812	CRISP1	cysteine rich secretory protein 1	2.72721	0.226893	3.23921	0.0363857	3.58734	6	49834257	49877096							1
ENSG00000204510	PRAMEF7	PRAME family member 7	3.17071	0.264599	3.43163	0.0224227	3.58293	1	12916610	12920482							1
ENSG00000280169	AL136526.1		3.17071	0.264599	3.43202	0.0229318	3.58293	13	100537365	100539567		1					0
ENSG00000248318	AC104958.1		2.68273	0.226893	3.22501	0.0292288	3.56361	8	120761253	120776832		1					0
ENSG00000250131	AC078881.1		3.12622	0.264599	3.41765	0.0233245	3.56254	4	177444979	177677126		1					0
ENSG00000234855	SLIT1-AS1	SLIT1 antisense RNA 1	3.12622	0.264599	3.41855	0.0251849	3.56254	10	97102756	97103747							1
ENSG00000254229	FAM90A12P	family with sequence similarity 90 member A12, pseudogene	3.12321	0.264599	3.49283	0.0104266	3.56115	8	8027077	8032305	1						0
ENSG00000230392	AC004835.1		29.5929	2.50771	3.6353	3.46127e-10	3.56081	0	119291529	119335610		1					0
ENSG00000227551	USP17L12	ubiquitin specific peptidase 17-like family member 12	5.20725	0.453786	3.28058	0.00860366	3.52044	4	9220152	9221744							1
ENSG00000112232	KHDRBS2	KH RNA binding domain containing, signal transduction associated 2	2.57837	0.226893	3.19589	0.033255	3.50638	6	61679960	62286227							1
ENSG00000235166	LINC01440	long intergenic non-protein coding RNA 1440	2.99579	0.264599	3.3274	0.0416201	3.50106	20	55408898	55482777			1				0
ENSG00000204990	AC005692.1		2.99278	0.264599	3.37456	0.0267903	3.4996	7	141414383	141416390		1					0
ENSG00000283361	CFAP97D2	CFAP97 domain containing 2	2.99278	0.264599	3.37807	0.0147606	3.4996	13	114154691	114223084							1
ENSG00000220918	AL132875.1		2.9804	0.264599	3.32769	0.043036	3.49363	6	79854684	79855632		1					0
ENSG00000157093	LYZL4	lysozyme like 4	2.97739	0.264599	3.37487	0.0275097	3.49217	3	42397078	42410600							1
ENSG00000230146	SEPHS1P4	selenophosphate synthetase 1 pseudogene 4	2.5369	0.226893	3.103	0.0429443	3.48298	0	73769248	73770423	1						0
ENSG00000278530	CHMP1B2P	charged multivesicular body protein 1B2, pseudogene	5.45442	0.491492	3.36838	0.00425656	3.47219	0	80228489	80335364	1						0
ENSG00000224960	PPP4R3C	protein phosphatase 4 regulatory subunit 3C	2.91752	0.264599	3.3616	0.0263671	3.46286	0	27460211	27463341							1
ENSG00000081853	PCDHGA2	protocadherin gamma subfamily A, 2	5.80895	0.529198	3.44053	0.00496671	3.4564	5	141338760	141512979							1
ENSG00000225226	LINC01795	long intergenic non-protein coding RNA 1795	2.83156	0.264599	3.27382	0.0431654	3.41972	2	58275877	58296548			1				0
ENSG00000234158	RPEP2	ribulose-5-phosphate-3-epimerase pseudogene 2	3.43326	0.324458	3.59302	0.0239677	3.40348	3	26015669	26016369	1						0
ENSG00000255298	OR8G5	olfactory receptor family 8 subfamily G member 5	3.42089	0.324458	3.55216	0.0177754	3.39827	11	124256376	124266218							1
ENSG00000234338	AC073349.2		2.78708	0.264599	3.25588	0.0407067	3.39687	7	64835280	64836882		1					0
ENSG00000235522	AC010978.1		2.38807	0.226893	3.05531	0.0402634	3.39576	2	105846534	105857177		1					0
ENSG00000245205	EEF1A1P4	eukaryotic translation elongation factor 1 alpha 1 pseudogene 4	2.38807	0.226893	3.05531	0.0402522	3.39576	12	19456244	19457648	1						0
ENSG00000258390	LINC02318	long intergenic non-protein coding RNA 2318	2.78407	0.264599	3.31965	0.0272902	3.39531	14	95573562	95581956			1				0
ENSG00000281903	LINC02246	long intergenic non-protein coding RNA 2246	2.76868	0.264599	3.31269	0.034227	3.38732	21	14819699	14918552			1				0
ENSG00000257846	AL512310.6		2.37268	0.226893	3.05509	0.0487734	3.38643	14	19668829	19670003		1					0
ENSG00000223646	AC002463.1		2.7426	0.264599	3.23824	0.0329817	3.37366	7	112622378	112708080		1					0
ENSG00000241135	LINC00881	long intergenic non-protein coding RNA 881	3.33192	0.324458	3.52555	0.0125025	3.36025	3	157089881	157101135			1				0
ENSG00000277704	AL445675.2		7.27156	0.718386	3.1781	0.00184205	3.33944	1	242890247	242890803		1					0
ENSG00000179144	GIMAP7	GTPase, IMAP family member 7	2.28371	0.226893	3.02893	0.0395935	3.3313	7	150514830	150521073							1
ENSG00000249699	LINC02261	long intergenic non-protein coding RNA 2261	3.22757	0.324458	3.50123	0.0166411	3.31434	4	27217479	27282225			1				0
ENSG00000232818	RPS2P32	ribosomal protein S2 pseudogene 32	2.23923	0.226893	3.04087	0.0245401	3.30292	7	23490473	23491364	1						0
ENSG00000248231	KRT8P4	keratin 8 pseudogene 4	2.57837	0.264599	3.19755	0.0312361	3.28458	8	89412621	89415071	1						0
ENSG00000215417	MIR17	miR-17-92a-1 cluster host gene #or# microRNA 17	2.57837	0.264599	3.19824	0.0304507	3.28458	13	91347820	91354579				1			0
ENSG00000256394	ASIC5	acid sensing ion channel subunit family member 5	3.14161	0.324458	3.41868	0.0260127	3.2754	4	155829729	155866273							1
ENSG00000237206	IMPDH1P4	inosine monophosphate dehydrogenase 1 pseudogene 4	3.12622	0.324458	3.41835	0.0247495	3.26832	0	43278125	43279658	1						0
ENSG00000231093	AL391256.1		4.27276	0.453786	3.08886	0.0285162	3.23508	0	145630218	145632375		1					0
ENSG00000214866	DCDC2C	doublecortin domain containing 2C	2.44492	0.264599	3.16068	0.0298646	3.20791	2	3703592	3847411							1
ENSG00000243828	AL355357.1		4.18982	0.453786	2.97238	0.0217046	3.2068	6	64728837	64733837		1					0
ENSG00000251588	AC125336.1		2.43255	0.264599	3.07087	0.0439049	3.20059	4	36506043	36508869		1					0
ENSG00000275302	CCL4	C-C motif chemokine ligand 4	2.40044	0.264599	3.12468	0.0458603	3.18142	17	36103590	36105621							1
ENSG00000282843	AL590644.3		2.38807	0.264599	3.05496	0.0419705	3.17396	1	17193232	17201733		1					0
ENSG00000259182	AC019254.1		2.83156	0.324458	3.27092	0.0351887	3.1255	15	101168530	101170821		1					0
ENSG00000230439	AL512488.1		3.93663	0.453786	2.91548	0.0207119	3.11688	1	93752924	93775444		1					0
ENSG00000279302	AC013643.3		2.28672	0.264599	2.91943	0.0448213	3.1114	8	27701194	27703789		1					0
ENSG00000228612	HK2P1	hexokinase 2 pseudogene 1	4.72228	0.551351	3.08233	0.0165509	3.09844	0	80571871	80574607	1						0
ENSG00000254044	AC034154.1		2.77169	0.324458	3.25553	0.0376363	3.09466	4	97334635	97633823		1					0
ENSG00000240457	RN7SL472P	RNA, 7SL, cytoplasmic 472, pseudogene	2.77169	0.324458	3.25347	0.0271149	3.09466	14	102077180	102077472	1						0
ENSG00000165841	CYP2C19	cytochrome P450 family 2 subfamily C member 19 /// cytochrome P450 family 2 subfamily C member 19 #or# NA	3.87375	0.453786	2.96021	0.0234652	3.09364	10	94762681	94853205							1
ENSG00000248893	FAM138E	family with sequence similarity 138 member E	7.2438	0.853656	3.11683	0.00275407	3.08502	15	101954885	101956412							1
ENSG00000213401	MAGEA12	MAGE family member A12 #or# CSAG family member 4 (pseudogene) /// MAGE family member A12	4.46909	0.529198	3.03595	0.0174018	3.0781	0	152733779	152737669	1						0
ENSG00000233071	RPSAP59	ribosomal protein SA pseudogene 59	3.82291	0.453786	2.8072	0.0351184	3.07459	0	103206010	103206899	1						0
ENSG00000214929	SPATA31D1	SPATA31 subfamily D member 1	6.79729	0.81595	3.07298	0.00214816	3.05841	9	81988772	81995256							1
ENSG00000078596	ITM2A	integral membrane protein 2A	4.36173	0.529198	3.05695	0.0182717	3.04302	0	79360384	79367667							1
ENSG00000234865	C5orf17	NA #or# chromosome 5 open reading frame 17 (putative) /// chromosome 5 open reading frame 17 (putative)	4.0256	0.491492	2.92945	0.0301245	3.03396	5	23980587	23980938							1
ENSG00000184292	TACSTD2	tumor associated calcium signal transducer 2	3.68946	0.453786	2.76906	0.0371658	3.02333	1	58575423	58577773							1
ENSG00000224177	LINC00570	long intergenic non-protein coding RNA 570	3.67106	0.453786	2.8107	0.0256439	3.01611	2	11393981	11403077			1				0
ENSG00000258877	ATP5F1AP4	ATP synthase F1 subunit alpha pseudogene 4	3.67106	0.453786	2.83164	0.0391316	3.01611	14	62604113	62605717	1						0
ENSG00000235749	AL390860.1		2.58139	0.324458	3.11623	0.0376437	2.99204	1	247639749	247747062		1					0
ENSG00000226662	CHMP1AP1	charged multivesicular body protein 1A pseudogene 1	3.5821	0.453786	2.79381	0.029116	2.98072	1	27686810	27687471	1						0
ENSG00000276892	AL022401.1		3.8199	0.491492	2.84216	0.0376933	2.95829	0	85851575	85851682		1					0
ENSG00000223940	KRT8P8	keratin 8 pseudogene 8	3.81689	0.491492	2.88173	0.0221479	2.95716	0	152479577	152481024	1						0
ENSG00000234560	OR10G8	olfactory receptor family 10 subfamily G member 8	4.57345	0.589057	3.03058	0.0254408	2.9568	11	124026798	124030634							1
ENSG00000215808	LINC01139	long intergenic non-protein coding RNA 1139	5.80594	0.756091	2.90332	0.00438906	2.9409	1	238480384	238486023			1				0
ENSG00000227942	FRMD8P1	FERM domain containing 8 pseudogene 1	6.24944	0.81595	2.97565	0.00437651	2.93717	0	65550898	65552421	1						0
ENSG00000274553	AC138035.3		5.95779	0.793797	2.86981	0.00377133	2.90793	5	181329049	181331839		1					0
ENSG00000108691	CCL2	C-C motif chemokine ligand 2	3.67106	0.491492	2.80204	0.0354194	2.90096	17	34255218	34257203							1
ENSG00000130396	AFDN	afadin, adherens junction formation factor	218.347	29.6426	2.8513	9.15353e-48	2.88088	6	167826922	167972023							1
ENSG00000265279	CLUHP6	clustered mitochondria homolog pseudogene 6	3.33192	0.453786	2.68376	0.0407742	2.87627	18	32196026	32196966	1						0
ENSG00000251629	LINC02241	long intergenic non-protein coding RNA 2241	3.31954	0.453786	2.6202	0.0468032	2.8709	5	20611840	20937691			1				0
ENSG00000256699	TMEM132D-AS2	TMEM132D antisense RNA 2	4.30487	0.589057	2.97721	0.0249239	2.86949	12	129208601	129212662							1
ENSG00000189057	FAM111B	family with sequence similarity 111 member B	4.6778	0.648916	3.01647	0.0264246	2.84973	11	59107185	59127410							1
ENSG00000258785	LINC01580	long intergenic non-protein coding RNA 1580	3.92425	0.551351	2.8358	0.0408416	2.83138	15	93900701	93984150			1				0
ENSG00000125780	TGM3	transglutaminase 3	6.49962	0.913515	2.99893	0.00471748	2.83085	20	2296001	2341078							1
ENSG00000175800	OR52B3P	olfactory receptor family 52 subfamily B member 3 pseudogene	3.90586	0.551351	2.8775	0.0276151	2.82459	11	4378282	4379209	1						0
ENSG00000223885	FAM90A13P	family with sequence similarity 90 member A13, pseudogene	3.8199	0.551351	2.80765	0.0330069	2.79249	8	7279770	7282780	1						0
ENSG00000171217	CLDN20	claudin 20	3.3764	0.491492	2.67939	0.0473101	2.78025	6	155264013	155276548							1
ENSG00000276775	IGHV4-4	immunoglobulin heavy variable 4-4	3.61119	0.529198	2.76731	0.0355844	2.7706	14	106011922	106012420							1
ENSG00000282987	AC099753.1		5.30859	0.778244	2.73336	0.0201855	2.77003	3	21006730	21226305		1					0
ENSG00000227152	OR2T7	olfactory receptor family 2 subfamily T member 7	4.89419	0.718386	2.64639	0.0179463	2.76824	1	248436359	248444316							1
ENSG00000213214	ARHGEF35	Rho guanine nucleotide exchange factor 35	3.71555	0.551351	2.78502	0.0301864	2.75253	7	144186083	144195655							1
ENSG00000214702	AC010931.1		4.57044	0.68068	2.57346	0.029587	2.74728	15	74097106	74098414		1					0
ENSG00000211955	IGHV3-33	immunoglobulin heavy variable 3-33	3.93663	0.589057	2.85335	0.0282327	2.74048	14	106359793	106360324							1
ENSG00000171815	PCDHB1	protocadherin beta 1	9.99877	1.53434	2.63614	0.000601267	2.70414	5	141051135	141059344							1
ENSG00000279288	AC073346.2		3.56972	0.551351	2.69989	0.0455754	2.69477	7	113075124	113077181		1					0
ENSG00000284706	AC073869.10		6.60397	1.02069	2.64929	0.00721778	2.69379	2	131335502	131355769		1					0
ENSG00000253798	AC008694.1		3.80451	0.589057	2.78092	0.0428052	2.69123	5	157682985	157690878		1					0
ENSG00000231637	USP17L29	ubiquitin specific peptidase 17-like family member 29	6.46116	1.00514	2.58139	0.00728556	2.6844	4	9353638	9355230							1
ENSG00000241224	C3orf85	chromosome 3 open reading frame 85	3.77843	0.589057	2.71817	0.0351735	2.68131	3	109118252	109150514							1
ENSG00000234042	AL591438.2		3.3764	0.529198	2.65377	0.0416422	2.67361	9	63703065	63703755		1					0
ENSG00000213088	ACKR1	atypical chemokine receptor 1 (Duffy blood group)	5.77986	0.907573	2.48419	0.0112487	2.67095	1	159203307	159206500							1
ENSG00000171903	CYP4F11	cytochrome P450 family 4 subfamily F member 11	7.69365	1.20988	2.57387	0.00273121	2.66881	19	15912367	15934867							1
ENSG00000269826	AC092327.2		4.55806	0.718386	2.53174	0.0436935	2.66559	16	86347387	86349611		1					0
ENSG00000250221	KRT8P32	keratin 8 pseudogene 32	5.17515	0.81595	2.68417	0.0188294	2.66505	5	98392070	98393530	1						0
ENSG00000166265	CYYR1	cysteine and tyrosine rich 1	3.49313	0.551351	2.73026	0.0343023	2.66348	21	26466209	26573284							1
ENSG00000237686	AL109615.3		9.88204	1.57204	2.59337	0.000418	2.65217	6	43995723	44074652		1					0
ENSG00000156219	ART3	ADP-ribosyltransferase 3	4.71927	0.756091	2.5418	0.0141644	2.64193	4	76011184	76112802							1
ENSG00000276122	AC026336.3		4.71927	0.756091	2.5575	0.0249803	2.64193	12	130138693	130140768		1					0
ENSG00000235711	ANKRD34C	ankyrin repeat domain 34C	4.71626	0.756091	2.5935	0.0152411	2.64101	15	79293285	79298235							1
ENSG00000215174	NLRP2B	NLR family pyrin domain containing 2B	4.70087	0.756091	2.59424	0.0179129	2.6363	0	57677067	57680260							1
ENSG00000279672	AP006621.5		3.28744	0.529198	2.63388	0.0318151	2.63508	11	779617	780755		1					0
ENSG00000283434	CSNKA2IP	casein kinase 2 subunit alpha' interacting protein	4.45371	0.718386	2.49021	0.030521	2.63218	3	88338413	88467562							1
ENSG00000231023	LINC00326	long intergenic non-protein coding RNA 326	4.38013	0.718386	2.4571	0.0239452	2.60814	6	133088080	133106578			1				0
ENSG00000005981	ASB4	ankyrin repeat and SOCS box containing 4	4.97246	0.81595	2.56264	0.0130246	2.60741	7	95478444	95540232							1
ENSG00000254235	AC022784.6		4.96644	0.81595	2.66033	0.0100366	2.60566	8	9249417	9413714		1					0
ENSG00000239920	AC104389.4		6.20797	1.02069	2.5329	0.00564103	2.60458	11	5254392	5678434		1					0
ENSG00000260850	AC007344.1		4.36775	0.718386	2.40351	0.0269059	2.60406	16	51354456	51525157		1					0
ENSG00000235643	LINC01647	long intergenic non-protein coding RNA 1647	7.10734	1.17217	2.4576	0.00896404	2.60012	1	11609531	11613355			1				0
ENSG00000259883	EHD4-AS1	EHD4 antisense RNA 1	3.92124	0.648916	2.84441	0.0206213	2.59521	15	41921417	41928883							1
ENSG00000249482	USP17L14P	ubiquitin specific peptidase 17-like family member 14, pseudogene	6.16348	1.02069	2.53045	0.00774164	2.5942	4	9229641	9231233	1						0
ENSG00000249811	USP17L21	ubiquitin specific peptidase 17-like family member 21	5.46981	0.907573	2.41261	0.0164823	2.5914	4	9262872	9264823							1
ENSG00000267529	AP005131.4		4.32327	0.718386	2.41073	0.033674	2.58929	18	13471012	13472709		1					0
ENSG00000258987	AL132642.1		6.61936	1.1027	2.63123	0.00494888	2.58565	14	93939555	93944129		1					0
ENSG00000213493	ACTN4P1	actinin alpha 4 pseudogene 1	3.5346	0.589057	2.74438	0.0476696	2.58507	4	116598161	116599611	1						0
ENSG00000118058	KMT2A	lysine methyltransferase 2A	193.034	32.2381	2.59342	5.79645e-38	2.58201	11	118436490	118526832							1
ENSG00000205784	ARRDC5	arrestin domain containing 5	3.28744	0.551351	2.62775	0.0401741	2.57592	19	4890437	4902867							1
ENSG00000250308	SALL4P1	spalt like transcription factor 4 pseudogene 1	4.47211	0.756091	2.43294	0.0371087	2.56432	5	57422464	57424391	1						0
ENSG00000236078	LINC01447	long intergenic non-protein coding RNA 1447	11.957	2.02583	2.49887	0.000296471	2.56128	7	47621939	47629893			1				0
ENSG00000226241	Z75746.1		6.10361	1.04284	2.52175	0.00749213	2.54914	0	103087198	103089277		1					0
ENSG00000224682	SOCS5P2	suppressor of cytokine signaling 5 pseudogene 2	4.77312	0.81595	2.62384	0.0148071	2.54838	9	135447446	135450154	1						0
ENSG00000283025	AC027045.3		4.36474	0.756091	2.44523	0.0259494	2.52926	17	9805443	9811047		1					0
ENSG00000144460	NYAP2	neuronal tyrosine-phosphorylated phosphoinositide-3-kinase adaptor 2	5.64473	0.982985	2.4437	0.0101	2.52166	2	225399710	225654018							1
ENSG00000147570	DNAJC5B	DnaJ heat shock protein family (Hsp40) member C5 beta	4.46307	0.778244	2.54531	0.0243708	2.51974	8	66021560	66100526							1
ENSG00000254440	PBOV1	prostate and breast cancer overexpressed 1	4.67479	0.81595	2.52321	0.0194234	2.51835	6	138215986	138218491							1
ENSG00000226690	AC013470.2		4.8651	0.853656	2.58674	0.0137011	2.51074	7	12469621	12542222		1					0
ENSG00000176840	MIR7-3HG	MIR7-3 host gene	13.7973	2.44785	2.52273	0.000236324	2.49479	19	4769140	4772533				1			0
ENSG00000211697	TRGV5	T cell receptor gamma variable 5	4.56742	0.81595	2.5551	0.0158652	2.48483	7	38349355	38350022							1
ENSG00000230987	AL359976.1		4.40922	0.793797	2.44084	0.0304598	2.47368	1	189989570	189993097		1					0
ENSG00000183837	PNMA3	PNMA family member 3	7.29765	1.323	2.45032	0.00232333	2.46362	0	153056409	153060467							1
ENSG00000213822	CEACAM18	carcinoembryonic antigen related cell adhesion molecule 18	5.20424	0.945279	2.34308	0.0357649	2.46088	19	51478622	51490952							1
ENSG00000197428	OR51D1	olfactory receptor family 51 subfamily D member 1	4.32026	0.793797	2.41749	0.0177233	2.44427	11	4637477	4643060							1
ENSG00000237457	AL391645.1	NA /// long intergenic non-protein coding RNA 1351 #or# NA	4.42461	0.81595	2.43528	0.0276896	2.439	1	190478551	190480735							1
ENSG00000147206	NXF3	nuclear RNA export factor 3	15.9151	2.93934	2.40526	2.31718e-05	2.43683	0	103075810	103093125							1
ENSG00000224478	AL356417.1		3.87676	0.718386	2.32133	0.0406541	2.43202	6	159094093	159116254		1					0
ENSG00000226516	FAM138B	family with sequence similarity 138 member B	5.4989	1.02069	2.37318	0.0112003	2.4296	2	113577382	113578852							1
ENSG00000189253	TRIM64B	tripartite motif containing 64B	4.57044	0.853656	2.49032	0.0228324	2.4206	11	89869282	89876017							1
ENSG00000262576	PCDHGA4	protocadherin gamma subfamily A, 4	5.45442	1.02069	2.37142	0.0216521	2.41788	5	141355025	141512979							1
ENSG00000228918	LINC01344	long intergenic non-protein coding RNA 1344	6.19559	1.17217	2.20954	0.0124927	2.40206	1	182129310	182314061			1				0
ENSG00000236714	LINC01844	long intergenic non-protein coding RNA 1844	4.30487	0.81595	2.41805	0.0354547	2.39942	5	142745600	142760998			1				0
ENSG00000280025	AL008638.6		4.18681	0.793797	2.39544	0.0216541	2.39901	22	27102766	27107019		1					0
ENSG00000234383	CTBP2P8	C-terminal binding protein 2 pseudogene 8	4.27577	0.81595	2.40798	0.0300642	2.38963	1	68161761	68163090	1						0
ENSG00000261741	FRG2KP	FSHD region gene 2 family member K, pseudogene	4.07008	0.778244	2.34416	0.045883	2.38676	16	31563082	31567716	1						0
ENSG00000203335	AC006019.1		7.88998	1.51218	2.29077	0.00372589	2.38339	7	154055585	154059561		1					0
ENSG00000186081	KRT5	keratin 5	8.68801	1.66961	2.39226	0.00359956	2.37952	12	52514575	52520687							1
ENSG00000244342	LINC00698	long intergenic non-protein coding RNA 698	4.43699	0.853656	2.45199	0.0378298	2.37785	3	62950430	63125062			1				0
ENSG00000244171	PBX2P1	PBX homeobox 2 pseudogene 1	4.23129	0.81595	2.39802	0.0331165	2.37454	3	143176327	143177617	1						0
ENSG00000121742	GJB6	gap junction protein beta 6	3.31352	0.648916	2.63842	0.0451481	2.35226	13	20221962	20232395							1
ENSG00000275896	PRSS2	serine protease 2	4.99553	0.982985	2.28103	0.0276757	2.3454	7	142760398	142774564							1
ENSG00000162391	FAM151A	family with sequence similarity 151 member A	10.9379	2.15516	2.22783	0.000916029	2.34348	1	54609182	54623556							1
ENSG00000279711	AP004782.1		9.08401	1.79893	2.27433	0.00215493	2.33619	11	133064697	133068129		1					0
ENSG00000166863	TAC3	tachykinin 3 #or# myosin IA /// tachykinin 3	4.57044	0.907573	2.1382	0.0258348	2.33225	12	57010000	57028883							1
ENSG00000249780	AC093809.1		15.2381	3.03097	2.22032	6.20453e-05	2.32984	4	12640298	12640637		1					0
ENSG00000228336	OR9H1P	olfactory receptor family 9 subfamily H member 1 pseudogene	5.22565	1.04284	2.2289	0.0343049	2.32509	1	247770169	247779524	1						0
ENSG00000166035	LIPC	lipase C, hepatic type	5.7046	1.14041	2.40862	0.0115183	2.32257	15	58410569	58569843							1
ENSG00000188219	POTEE	POTE ankyrin domain family member E	4.70388	0.945279	2.16527	0.0334806	2.31504	2	131218067	131265278							1
ENSG00000285090	AC002074.1		6.31533	1.26974	2.19931	0.0128936	2.31433	7	94278680	94395608		1					0
ENSG00000151962	RBM46	RNA binding motif protein 46	5.37148	1.08055	2.27573	0.0340784	2.31355	4	154781213	154828813							1
ENSG00000234736	FAM170B-AS1	FAM170B antisense RNA 1	4.0256	0.81595	2.3116	0.0354307	2.30265	10	49121839	49151547							1
ENSG00000248118	LINC01019	long intergenic non-protein coding RNA 1019	5.02932	1.02069	2.21666	0.0189086	2.30082	5	3417152	3536094			1				0
ENSG00000156009	MAGEA8	MAGE family member A8	5.02932	1.02069	2.21721	0.0193337	2.30082	0	149881141	149885835							1
ENSG00000281008	AC004808.2		3.68344	0.756091	2.26454	0.0449208	2.28442	7	78134079	78134851		1					0
ENSG00000176922	OR51S1	olfactory receptor family 51 subfamily S member 1	4.96945	1.02069	2.22679	0.044921	2.28354	11	4847489	4849238							1
ENSG00000235955	CICP20	capicua transcriptional repressor pseudogene 20	7.45886	1.53434	2.2447	0.00356842	2.28134	7	45816216	45819016	1						0
ENSG00000198300	PEG3	paternally expressed 3	5.51429	1.14041	2.34421	0.0146031	2.27362	19	56810083	56840728							1
ENSG00000254585	MAGEL2	MAGE family member L2	4.12694	0.853656	2.36686	0.0294738	2.27334	15	23643544	23647841							1
ENSG00000281613	AL365214.3	ret finger protein like 4B #or# NA /// NA	5.11528	1.0584	2.26387	0.0406755	2.27293	6	112236806	112350094							1
ENSG00000153294	ADGRF2	adhesion G protein-coupled receptor F2 /// adhesion G protein-coupled receptor F4 #or# adhesion G protein-coupled receptor F2	10.8045	2.23651	2.335	0.000493501	2.27231	6	47685864	47722021							1
ENSG00000235381	AL596202.1		4.22828	0.875809	2.40864	0.0389808	2.27138	6	155253139	155256724		1					0
ENSG00000169908	TM4SF1	transmembrane 4 L six family member 1	4.92497	1.02069	2.20553	0.0222379	2.27057	3	149369022	149377865							1
ENSG00000100652	SLC10A1	solute carrier family 10 member 1	4.40621	0.913515	2.44859	0.0233168	2.27004	14	69775417	69797289							1
ENSG00000105352	CEACAM4	carcinoembryonic antigen related cell adhesion molecule 4	3.93362	0.81595	2.34285	0.0358606	2.2693	19	41618971	41627074							1
ENSG00000188959	C9orf152	chromosome 9 open reading frame 152	3.92425	0.81595	2.23605	0.0430323	2.26587	9	110190048	110208189							1
ENSG00000214102	WEE2	WEE1 homolog 2	5.99926	1.24758	2.1982	0.0112506	2.26565	7	141708353	141731271							1
ENSG00000250274	AC034199.1		4.71626	0.982985	2.19206	0.0315391	2.2624	5	170308701	170312716		1					0
ENSG00000248339	LINC02504	long intergenic non-protein coding RNA 2504	4.52595	0.945279	2.12576	0.0322846	2.25941	4	171289475	171298267			1				0
ENSG00000187980	PLA2G2C	phospholipase A2 group IIC	5.45141	1.14041	2.36237	0.0197206	2.25708	1	20161253	20177424							1
ENSG00000260477	LINC01584	long intergenic non-protein coding RNA 1584	6.99997	1.46487	2.38951	0.005534	2.25658	15	86078809	86116717			1				0
ENSG00000250745	USP17L20	ubiquitin specific peptidase 17-like family member 20	4.8651	1.02069	2.19741	0.0193478	2.25292	4	9258124	9260075							1
ENSG00000214263	RPSAP53	ribosomal protein SA pseudogene 53	5.14738	1.08055	2.23356	0.0262655	2.25207	13	67266845	67267706	1						0
ENSG00000246876	LINC02466	long intergenic non-protein coding RNA 2466	4.6778	0.982985	2.09225	0.0376756	2.25059	4	129724171	129771481			1				0
ENSG00000173811	CCDC13-AS1	CCDC13 antisense RNA 1	7.46488	1.57204	2.18016	0.00685358	2.24748	3	42732575	42746768							1
ENSG00000276807	AC022188.1		4.15603	0.875809	2.35899	0.0451236	2.24652	15	73730048	73731711		1					0
ENSG00000259776	AC093426.1		7.69365	1.6319	2.27767	0.00442853	2.23711	1	239247808	239250818		1					0
ENSG00000248933	USP17L22	ubiquitin specific peptidase 17-like family member 22	7.39899	1.57204	2.23285	0.00443448	2.23469	4	9267619	9269570							1
ENSG00000235741	AC099796.1		5.05842	1.08055	2.21855	0.0333318	2.22692	1	54516412	54517259		1					0
ENSG00000188460	ACTBP11	actin, beta pseudogene 11	4.41859	0.945279	2.15729	0.0305431	2.22477	1	223863726	223864851	1						0
ENSG00000154227	CERS3	ceramide synthase 3	5.82133	1.24758	2.17387	0.0110596	2.22221	15	100400395	100544995							1
ENSG00000112486	CCR6	C-C motif chemokine receptor 6 /// C-C motif chemokine receptor 6 #or# NA	5.2902	1.14041	2.31595	0.0169136	2.21377	6	167111807	167139696							1
ENSG00000275945	EIF3FP1	eukaryotic translation initiation factor 3 subunit F pseudogene 1	5.70761	1.23203	2.09523	0.018269	2.21185	21	10330732	10331537	1						0
ENSG00000176076	KCNE5	potassium voltage-gated channel subfamily E regulatory subunit 5	5.15976	1.11826	2.25216	0.0302523	2.20605	0	109623700	109625172							1
ENSG00000189334	S100A14	S100 calcium binding protein A14	3.72792	0.81595	2.2646	0.0320835	2.19182	1	153614255	153616986							1
ENSG00000266976	AC079466.1		4.66241	1.02069	2.09277	0.0493089	2.19153	19	28606688	28615229		1					0
ENSG00000179023	KLHDC7A	kelch domain containing 7A	11.3232	2.49517	2.10783	0.00181233	2.18208	1	18480982	18486126							1
ENSG00000260876	LINC01229	long intergenic non-protein coding RNA 1229	6.86017	1.51218	2.07359	0.0146191	2.18161	16	79676108	79807922			1				0
ENSG00000170356	OR2A20P	olfactory receptor family 2 subfamily A member 20 pseudogene /// olfactory receptor family 2 subfamily A member 20 pseudogene #or# NA	5.74607	1.26974	2.168	0.0115822	2.17805	7	144250045	144256244	1						0
ENSG00000104689	TNFRSF10A	TNF receptor superfamily member 10a	4.42461	0.982985	2.04758	0.0402428	2.17031	8	23190452	23225126							1
ENSG00000281721	LINC01080	long intergenic non-protein coding RNA 1080	5.60326	1.24758	2.07606	0.0208617	2.16713	13	80011077	80028283			1				0
ENSG00000280279	AC240565.2		4.40621	0.982985	2.10063	0.0440869	2.1643	17	64099	76866		1					0
ENSG00000224382	LINC00703	long intergenic non-protein coding RNA 703	7.78261	1.73908	2.09123	0.00425753	2.16193	10	4384246	4410612			1				0
ENSG00000125538	IL1B	interleukin 1 beta	4.38013	0.982985	2.03965	0.0419782	2.15573	2	112829751	112836903							1
ENSG00000251623	AC139491.5		4.90958	1.1027	2.18991	0.0212245	2.15456	5	176119545	176156937		1					0
ENSG00000213901	SLC23A3	solute carrier family 23 member 3	4.06707	0.913515	2.34052	0.0307058	2.15449	2	219161465	219170095							1
ENSG00000244198	AC004889.1		5.51429	1.24758	2.05817	0.0178535	2.14404	7	144194858	144280547		1					0
ENSG00000279712	FP325330.3		9.87903	2.24311	2.18663	0.00140155	2.13887	22	47916728	47926264		1					0
ENSG00000224057	EGFR-AS1	EGFR antisense RNA 1	5.8812	1.34515	2.15072	0.022071	2.12834	7	55179750	55188934							1
ENSG00000239544	AL442663.1		3.73093	0.853656	2.18156	0.0474207	2.12781	14	72963645	72964008		1					0
ENSG00000173369	C1QB	complement C1q B chain	4.44768	1.02069	2.13218	0.0436051	2.12351	1	22652762	22661538							1
ENSG00000233670	PIRT	phosphoinositide interacting regulator of transient receptor potential channels	5.51429	1.26974	2.06675	0.0333123	2.11865	17	10822475	10838445							1
ENSG00000272316	AL021368.2		5.38385	1.24758	2.00382	0.0294221	2.1095	6	57908560	57913911		1					0
ENSG00000214660	SLC29A4P2	solute carrier family 29 member 4 pseudogene 2	4.6594	1.08055	2.10978	0.0467938	2.10838	7	63556598	63562588	1						0
ENSG00000235371	AL122018.1		6.17586	1.43677	2.0065	0.0179616	2.10381	1	236110061	236112370		1					0
ENSG00000198711	SSBP3-AS1	SSBP3 antisense RNA 1	6.49962	1.51218	2.05913	0.0112495	2.10372	1	54236440	54239063							1
ENSG00000279678	AC090386.2		8.40271	1.95636	2.16409	0.00318014	2.10268	18	37305295	37306333		1					0
ENSG00000229981	LINC01435	long intergenic non-protein coding RNA 1435	8.5636	2.00367	1.92936	0.0107197	2.09557	10	107694973	108197849			1				0
ENSG00000230666	CEACAM22P	carcinoembryonic antigen related cell adhesion molecule 22, pseudogene	5.57416	1.30744	2.05452	0.0216865	2.09201	19	44537058	44620821	1						0
ENSG00000105549	THEG	theg spermatid protein	4.0072	0.945279	1.9956	0.0444727	2.08378	19	361747	376670							1
ENSG00000151790	TDO2	tryptophan 2,3-dioxygenase	10.275	2.4257	2.09991	0.00061663	2.08267	4	155854738	155920406							1
ENSG00000204876	AC021218.1		5.93939	1.40501	2.15537	0.0153097	2.07974	7	155962632	155966343		1					0
ENSG00000275898	AC125603.4		4.12393	0.982985	2.05288	0.0332935	2.06878	12	116580974	116583672		1					0
ENSG00000125798	FOXA2	forkhead box A2 /// forkhead box A2 #or# NA	5.0738	1.20988	1.92866	0.0355311	2.06821	20	22581005	22585455							1
ENSG00000169344	UMOD	uromodulin	5.32398	1.26974	2.00192	0.0399469	2.06798	16	20333052	20356301							1
ENSG00000280061	AC011504.1		5.32398	1.26974	1.98427	0.0210716	2.06798	19	30553956	30558058		1					0
ENSG00000221995	TIAF1	TGFB1-induced anti-apoptotic factor 1 /// myosin XVIIIA #or# TGFB1-induced anti-apoptotic factor 1	9.9205	2.38799	2.0576	0.00162172	2.05462	17	29073521	29078857							1
ENSG00000279649	AC020978.9		5.25809	1.26974	2.06276	0.024836	2.05001	16	68290087	68292790		1					0
ENSG00000238755	LINC02006	long intergenic non-protein coding RNA 2006	7.44949	1.79893	1.95782	0.00843351	2.05	3	153384934	153980186			1				0
ENSG00000260094	LINC00564	long intergenic non-protein coding RNA 564	4.96644	1.20988	1.96157	0.0431412	2.03735	13	81225865	81226983			1				0
ENSG00000166743	ACSM1	acyl-CoA synthetase medium chain family member 1	6.01465	1.47448	1.94715	0.0247567	2.02828	16	20623237	20698890							1
ENSG00000237750	AC011900.1		4.38013	1.08055	2.00965	0.0457557	2.01921	2	162768936	162797972		1					0
ENSG00000236397	DDX11L2	DEAD/H-box helicase 11 like 2	5.01393	1.23797	2.17288	0.0168499	2.01796	2	113599036	113601261							1
ENSG00000237378	AL445989.1		13.3063	3.28896	1.98981	0.000857094	2.0164	13	63746741	63751080		1					0
ENSG00000255087	AP001993.1		6.9585	1.72352	1.92649	0.0106152	2.01342	11	127021754	127172363		1					0
ENSG00000228623	ZNF883	zinc finger protein 883 /// zinc finger protein 883 #or# zinc finger protein 883	5.40994	1.34515	2.02603	0.0179001	2.00785	9	112957722	113012227							1
ENSG00000255491	AC100858.3		4.43397	1.1027	2.10118	0.041244	2.00756	8	124811226	124857516		1					0
ENSG00000214894	LINC00243	long intergenic non-protein coding RNA 243	7.96223	1.98812	1.91803	0.00838173	2.00177	6	30798654	30830659			1				0
ENSG00000269220	LINC00528	long intergenic non-protein coding RNA 528	4.15905	1.04284	1.92259	0.038217	1.99573	22	17777322	17779481			1				0
ENSG00000242265	PEG10	paternally expressed 10	5.11528	1.28529	1.95364	0.0178961	1.99272	7	94656325	94669695							1
ENSG00000229867	STEAP3-AS1	STEAP3 antisense RNA 1	5.39154	1.36136	1.87174	0.0402397	1.98565	2	119244422	119249071							1
ENSG00000187268	FAM9C	family with sequence similarity 9 member C	5.32097	1.34515	2.01279	0.0200973	1.98392	0	13035618	13044682							1
ENSG00000138813	C4orf17	chromosome 4 open reading frame 17	5.38385	1.36136	1.77653	0.0397132	1.98359	4	99511004	99542303							1
ENSG00000260469	C15orf59-AS1	C15orf59 antisense RNA 1	7.1963	1.82109	1.94212	0.0161816	1.98246	15	73752317	73770613							1
ENSG00000226358	KRT8P38	keratin 8 pseudogene 38	7.46187	1.89056	1.83411	0.0141657	1.98073	10	88727485	88728914	1						0
ENSG00000237399	PITRM1-AS1	PITRM1 antisense RNA 1 /// PITRM1 antisense RNA 1 #or# NA	5.81831	1.47448	1.95587	0.0173314	1.9804	10	3141632	3167972							1
ENSG00000214045	AC091807.1		5.38084	1.3673	2.01196	0.0289066	1.9765	0	40359183	40360726		1					0
ENSG00000250334	LINC00989	long intergenic non-protein coding RNA 989	4.90958	1.24758	1.89877	0.0434708	1.97646	4	79492416	79576460			1				0
ENSG00000102243	VGLL1	vestigial like family member 1	5.2795	1.34515	1.96381	0.0431934	1.97264	0	136532152	136556807							1
ENSG00000165471	MBL2	mannose binding lectin 2	7.402	1.89056	1.84572	0.0231708	1.9691	10	52765380	52771700							1
ENSG00000235862	AL590648.2		4.61191	1.17811	2.09953	0.0438853	1.96888	1	212624284	212626771		1					0
ENSG00000256618	MTRNR2L1	MT-RNR2 like 1	5.77049	1.47448	1.81455	0.0421706	1.96849	17	22523111	22524663							1
ENSG00000218839	FAM138C	family with sequence similarity 138 member C	4.07008	1.04284	1.91439	0.0477692	1.96453	9	34394	37269							1
ENSG00000259870	AC024651.2		6.22034	1.59419	1.97398	0.0352776	1.96417	15	97876289	97878386		1					0
ENSG00000216863	LY86-AS1	LY86 antisense RNA 1	5.09989	1.30744	1.95412	0.0278395	1.96372	6	6346465	6622771							1
ENSG00000180257	ZNF816	zinc finger protein 816	4.8651	1.24758	1.88424	0.0324256	1.96333	19	52949379	52962911							1
ENSG00000185303	SFTPA2	surfactant protein A2	10.0877	2.59339	1.87952	0.0469999	1.95969	10	79555852	79560402							1
ENSG00000175164	ABO	ABO, alpha 1-3-N-acetylgalactosaminyltransferase and alpha 1-3-galactosyltransferase	9.85295	2.54542	1.98315	0.00231862	1.95265	9	133250401	133275219							1
ENSG00000205976	AC091951.1		5.35007	1.38285	1.99903	0.0371508	1.95191	5	7299774	7306592		1					0
ENSG00000170629	DPY19L2P2	DPY19L2 pseudogene 2	11.7851	3.04652	1.85401	0.00110578	1.95174	7	103175133	103280410	1						0
ENSG00000229618	AC011287.1		6.31232	1.6319	1.94356	0.0144577	1.95162	7	12726152	13751920		1					0
ENSG00000183034	OTOP2	otopetrin 2	9.59976	2.48556	1.97229	0.00267957	1.94943	17	74924275	74933912							1
ENSG00000235737	TRIM60P19	tripartite motif containing 60 pseudogene 19	7.8639	2.04138	1.86158	0.0237573	1.9457	13	66268997	66270458	1						0
ENSG00000156269	NAA11	N(alpha)-acetyltransferase 11, NatA catalytic subunit	6.83108	1.77678	1.84284	0.0242392	1.94285	4	79225694	79326050							1
ENSG00000219926	OR7E104P	olfactory receptor family 7 subfamily E member 104 pseudogene	24.5833	6.44559	1.95514	7.57983e-06	1.9313	13	63828840	63844125	1						0
ENSG00000008517	IL32	interleukin 32	12.1781	3.21355	1.83854	0.00184571	1.92205	16	3065297	3082192							1
ENSG00000227678	AL355581.1	NA /// sterile alpha motif domain containing 3 #or# NA	6.06214	1.60975	1.88387	0.0271507	1.91299	6	130133410	130146179							1
ENSG00000180432	CYP8B1	cytochrome P450 family 8 subfamily B member 1	7.2147	1.91865	1.88678	0.0141985	1.91085	3	42856005	42876165							1
ENSG00000093134	VNN3	vanin 3	7.24079	1.92826	1.77464	0.0165987	1.90884	6	132722787	132734765							1
ENSG00000165131	LLCFC1	LLLL and CFNLAS motif containing 1	6.12201	1.6319	1.88722	0.0262051	1.90745	7	142939343	142940868							1
ENSG00000155052	CNTNAP5	contactin associated protein like 5	10.278	2.74421	1.81119	0.00301689	1.9051	2	124025287	124915287							1
ENSG00000215160	OR7E122P	olfactory receptor family 7 subfamily E member 122 pseudogene	6.05913	1.6319	1.91764	0.0163335	1.89256	3	8682943	8693701	1						0
ENSG00000165568	AKR1E2	aldo-keto reductase family 1 member E2	4.836	1.30744	1.86472	0.0368983	1.88707	10	4786629	4848062							1
ENSG00000236673	AL117378.1		4.82061	1.30744	1.86587	0.0363161	1.88247	6	131901963	131920565		1					0
ENSG00000175003	SLC22A1	solute carrier family 22 member 1	5.57115	1.51218	1.84146	0.0261292	1.88134	6	160121789	160158718							1
ENSG00000175197	AC022506.1	DNA damage inducible transcript 3 #or# NA	6.00528	1.6319	1.8186	0.0182714	1.87968	12	57516588	57521737							1
ENSG00000227674	LINC00355	long intergenic non-protein coding RNA 355	10.5222	2.86987	1.9917	0.0010245	1.87438	13	63986371	64076011			1				0
ENSG00000126952	NXF5	nuclear RNA export factor 5	7.41136	2.02583	1.8583	0.0140451	1.87123	0	101832112	101857577							1
ENSG00000166510	CCDC68	coiled-coil domain containing 68	6.85716	1.87435	1.85051	0.0101759	1.87122	18	54901509	54959508							1
ENSG00000198758	EPS8L3	EPS8 like 3	10.6389	2.93934	1.8995	0.00159756	1.85579	1	109750080	109764027							1
ENSG00000099256	PRTFDC1	phosphoribosyl transferase domain containing 1 /// phosphoribosyl transferase domain containing 1 #or# RNA, 7SK small nuclear pseudogene 241	7.68127	2.12339	1.84334	0.00945945	1.85497	10	24848607	24952604	1						0
ENSG00000163751	CPA3	carboxypeptidase A3	6.00227	1.66366	1.71687	0.0460763	1.85114	3	148865256	148897196							1
ENSG00000204684	AL133464.1		5.47282	1.53434	1.74599	0.0404195	1.83467	20	22371216	22471557		1					0
ENSG00000185247	MAGEA11	MAGE family member A11	7.10734	1.99406	1.89315	0.01108	1.8336	0	149688228	149717266							1
ENSG00000185433	LINC00158	long intergenic non-protein coding RNA 158	6.75582	1.8965	1.80904	0.021119	1.83279	21	25385820	25431701			1				0
ENSG00000172867	KRT2	keratin 2	5.07079	1.42716	1.9121	0.0422062	1.82906	12	52644558	52652164							1
ENSG00000007933	FMO3	flavin containing monooxygenase 3	7.64917	2.1611	1.85955	0.0101335	1.82354	1	171090877	171117819							1
ENSG00000237372	AL606807.1		6.63306	1.87435	1.83139	0.0298607	1.82329	9	89639814	89719759		1					0
ENSG00000127533	F2RL3	F2R like thrombin or trypsin receptor 3	8.0833	2.29043	1.71716	0.0107005	1.81933	19	16888860	16892606							1
ENSG00000268089	GABRQ	gamma-aminobutyric acid type A receptor theta subunit	12.0045	3.40868	1.77071	0.00230746	1.81629	0	152638183	152657534							1
ENSG00000177324	BEND2	BEN domain containing 2	5.60326	1.59419	1.79453	0.0311784	1.81344	0	18162931	18220883							1
ENSG00000183347	GBP6	guanylate binding protein family member 6	6.84177	1.95636	1.84163	0.0205276	1.8062	1	89364058	89386461							1
ENSG00000203985	LDLRAD1	low density lipoprotein receptor class A domain containing 1	6.94613	1.99406	1.84523	0.0121357	1.8005	1	54007299	54018186							1
ENSG00000161640	SIGLEC11	sialic acid binding Ig like lectin 11	12.8842	3.70204	1.80094	0.00148834	1.79921	19	49948985	49961172							1
ENSG00000165066	NKX6-3	NK6 homeobox 3	6.10964	1.76123	1.64478	0.0353447	1.7945	8	41645178	41650669							1
ENSG00000250844	USP17L18	ubiquitin specific peptidase 17-like family member 18	7.55084	2.18325	1.7914	0.016332	1.79016	4	9248630	9250581							1
ENSG00000234429	AC105342.1		5.40994	1.57204	1.77128	0.0255039	1.78297	2	81194337	81201184		1					0
ENSG00000131721	RHOXF2	Rhox homeobox family member 2	7.34213	2.13895	1.775	0.0207349	1.7793	0	120158561	120165630							1
ENSG00000205634	LINC00898	long intergenic non-protein coding RNA 898	7.84851	2.29043	1.68198	0.0222736	1.7768	22	47621043	47631569			1				0
ENSG00000278254	AC004852.2		5.30558	1.54989	1.76154	0.0330948	1.77535	7	9082557	9189857		1					0
ENSG00000153165	RGPD3	RANBP2-like and GRIP domain containing 3	4.90958	1.43677	1.64	0.0450568	1.77277	2	106391290	106468376							1
ENSG00000239998	LILRA2	leukocyte immunoglobulin like receptor A2	8.14016	2.38799	1.73917	0.00917729	1.76926	19	54572920	54590287							1
ENSG00000221878	PSG7	pregnancy specific beta-1-glycoprotein 7 (gene/pseudogene)	5.91331	1.73908	1.66837	0.0355208	1.76564	19	42924132	42937178	1						0
ENSG00000233355	CHRM3-AS2	CHRM3 antisense RNA 2	5.85042	1.72947	1.88279	0.016286	1.75821	1	239703381	239730465							1
ENSG00000240520	UOX	urate oxidase (pseudogene)	7.74114	2.29043	1.68991	0.0131907	1.75693	1	84363706	84397831	1						0
ENSG00000177575	CD163	CD163 molecule /// CD163 molecule #or# CD163 molecule like 1	9.081	2.6903	1.76604	0.00695006	1.75509	12	7470813	7503893							1
ENSG00000167800	TBX10	T-box 10	7.79198	2.31258	1.77255	0.017583	1.75249	11	67631303	67639560							1
ENSG00000278616	BEND3P3	BEN domain containing 3 pseudogene 3	11.4212	3.39313	1.66656	0.00644645	1.75103	10	79682997	79685436	1						0
ENSG00000143001	TMEM61	transmembrane protein 61	6.22637	1.85879	1.69129	0.0443956	1.74402	1	54980792	54992293							1
ENSG00000186723	OR10H1	olfactory receptor family 10 subfamily H member 1	7.34514	2.19286	1.64087	0.046949	1.74397	19	15804549	15815664							1
ENSG00000253686	LINC01484	long intergenic non-protein coding RNA 1484	7.21169	2.15516	1.61499	0.0330055	1.74254	5	173707614	173746211			1				0
ENSG00000144681	STAC	SH3 and cysteine rich domain	9.63488	2.87948	1.65092	0.0075316	1.74246	3	36380344	36548007							1
ENSG00000185296	AC026785.1		9.68872	2.90164	1.7028	0.00433958	1.73944	5	17306381	17306960		1					0
ENSG00000165606	DRGX	dorsal root ganglia homeobox	5.27649	1.59419	1.74891	0.0384347	1.72675	10	49364181	49396016							1
ENSG00000205413	SAMD9	sterile alpha motif domain containing 9	7.006	2.12339	1.68062	0.021284	1.72222	7	93099513	93118023							1
ENSG00000172349	IL16	interleukin 16	22.295	6.75816	1.63863	4.65309e-05	1.72201	15	81159575	81314058							1
ENSG00000150361	KLHL1	kelch like family member 1	10.4898	3.18179	1.65691	0.00640202	1.72107	13	69700594	70108493							1
ENSG00000223704	LINC01422	long intergenic non-protein coding RNA 1422	6.74678	2.04798	1.74048	0.0148186	1.72	22	26858634	26865786			1				0
ENSG00000277422	REXO1L6P	REXO1 like 6, pseudogene	19.2256	5.84098	1.71075	0.000109189	1.71875	8	85826865	85828467	1						0
ENSG00000185985	SLITRK2	SLIT and NTRK like family member 2	13.1541	3.99774	1.69337	0.00141185	1.71826	0	145817832	145829856							1
ENSG00000248472	DDX11L9	DEAD/H-box helicase 11 like 9	4.92196	1.49663	1.68231	0.0365817	1.71751	15	101976558	101979093							1
ENSG00000284428	AC092329.4		6.42905	1.95636	1.75886	0.0216844	1.71643	19	23259906	23274251		1					0
ENSG00000120708	TGFBI	transforming growth factor beta induced	9.25592	2.81963	1.68637	0.00551916	1.71487	5	136028895	136063818							1
ENSG00000133055	MYBPH	myosin binding protein H	6.62237	2.02583	1.6266	0.0339817	1.70884	1	203167811	203175813							1
ENSG00000163283	ALPP	alkaline phosphatase, placental	10.8383	3.31772	1.64572	0.00434715	1.70787	2	232378534	232382889							1
ENSG00000155511	GRIA1	glutamate ionotropic receptor AMPA type subunit 1	10.4837	3.21355	1.61087	0.00608425	1.70591	5	153489615	153813869							1
ENSG00000169306	IL1RAPL1	interleukin 1 receptor accessory protein like 1	6.04675	1.85879	1.66955	0.0421942	1.70179	0	28587399	29956723							1
ENSG00000276998	REXO1L2P	REXO1 like 2, pseudogene	21.6244	6.65693	1.70812	5.75008e-05	1.69973	8	85775106	85779090	1						0
ENSG00000239039	SNORD13	small nucleolar RNA, C/D box 13	6.80966	2.10124	1.70121	0.0101991	1.69634	8	33513475	33513578					1		0
ENSG00000137860	SLC28A2	solute carrier family 28 member 2	6.4043	1.97851	1.68404	0.0311485	1.69462	15	45252230	45277845							1
ENSG00000152910	CNTNAP4	contactin associated protein like 4 #or# NA /// contactin associated protein like 4	6.01465	1.85879	1.69732	0.0260725	1.69411	16	76277278	76559238							1
ENSG00000283259	AC242022.1		6.10361	1.89056	1.56645	0.0473295	1.69085	1	2773603	2776473		1					0
ENSG00000180543	TSPYL5	TSPY like 5	6.119	1.8965	1.69894	0.0371614	1.68996	8	97273474	97277964							1
ENSG00000250456	LINC02260	long intergenic non-protein coding RNA 2260	6.91402	2.14555	1.70138	0.029012	1.68818	4	54603211	54607131			1				0
ENSG00000222185	MEG8	NA #or# maternally expressed 8, small nucleolar RNA host gene /// maternally expressed 8, small nucleolar RNA host gene	13.9234	4.3222	1.73496	0.00253445	1.68767	14	100998467	100998541							1
ENSG00000125910	S1PR4	sphingosine-1-phosphate receptor 4	6.71133	2.08569	1.62942	0.0353756	1.68608	19	3172346	3180332							1
ENSG00000283235	AC139493.2		5.77986	1.79893	1.64144	0.046705	1.68389	5	176173345	176199295		1					0
ENSG00000271381	REXO1L9P	REXO1 like 9, pseudogene	19.0169	5.926	1.65041	0.000249999	1.68215	8	85762909	85766931	1						0
ENSG00000176182	MYPOP	Myb related transcription factor, partner of profilin	7.07523	2.2054	1.74428	0.0126617	1.68173	19	45890020	45902604							1
ENSG00000232810	TNF	tumor necrosis factor	6.07452	1.8965	1.69244	0.0376927	1.67943	6	31575567	31578336							1
ENSG00000119913	TECTB	tectorin beta /// tectorin beta #or# microRNA 6715a	5.26411	1.64745	1.68893	0.0462222	1.67595	10	112283400	112305035							1
ENSG00000153283	CD96	CD96 molecule	7.87158	2.47	1.71082	0.0134934	1.67214	3	111292719	111665750							1
ENSG00000017427	IGF1	insulin like growth factor 1	7.32975	2.30297	1.72188	0.0223548	1.67027	12	102395874	102481744							1
ENSG00000257762	LINC02401	long intergenic non-protein coding RNA 2401	7.20868	2.26827	1.61441	0.0268565	1.66814	12	103547794	103559815			1				0
ENSG00000111262	KCNA1	potassium voltage-gated channel subfamily A member 1	8.51008	2.68435	1.54408	0.0200855	1.6646	12	4909893	4918256							1
ENSG00000089472	HEPH	hephaestin	7.52942	2.38205	1.58347	0.0275616	1.66034	0	66162549	66268867							1
ENSG00000122986	HVCN1	hydrogen voltage gated channel 1	7.04446	2.23057	1.60649	0.0243804	1.65908	12	110627841	110704950							1
ENSG00000285280	AL390957.1		21.9066	6.97545	1.61965	7.98952e-05	1.65101	1	192167786	192957713		1					0
ENSG00000196172	ZNF681	zinc finger protein 681	4.92497	1.57204	1.61265	0.046966	1.64747	19	23739195	23758891							1
ENSG00000205426	KRT81	keratin 81	10.3824	3.32366	1.65879	0.00858358	1.6433	12	52285913	52291534							1
ENSG00000230916	MTCO1P53	mitochondrially encoded cytochrome c oxidase I pseudogene 53	10.1707	3.2572	1.6697	0.00636348	1.64271	0	126471705	126472403	1						0
ENSG00000234647	AL606970.3		8.86461	2.84178	1.57215	0.0131031	1.64126	6	168242938	168262581		1					0
ENSG00000228933	AC107419.1		6.50564	2.08569	1.55664	0.0287268	1.64117	0	27174920	27398997		1					0
ENSG00000176134	AL445665.1		5.26411	1.69176	1.68483	0.0446718	1.63767	9	64637845	64652556		1					0
ENSG00000253846	PCDHGA10	protocadherin gamma subfamily A, 10	6.85415	2.2054	1.68821	0.0225857	1.63593	5	141412987	141512979							1
ENSG00000198046	ZNF667	zinc finger protein 667	7.51404	2.41976	1.57345	0.0206358	1.63473	19	56439325	56478065							1
ENSG00000100867	DHRS2	dehydrogenase/reductase 2	38.6984	12.4727	1.65483	2.02595e-07	1.63349	14	23630115	23645639							1
ENSG00000121807	CCR2	C-C motif chemokine receptor 2	6.25245	2.01622	1.69347	0.0370592	1.63277	3	46353734	46360928							1
ENSG00000266402	SNORA50C	small nucleolar RNA host gene 25 #or# small nucleolar RNA, H/ACA box 50C #or# NA	8.26592	2.67474	1.55573	0.0340713	1.62778	17	64145970	64146476					1		0
ENSG00000249790	AC092490.1		5.97016	1.93421	1.67114	0.0377306	1.62603	12	8788257	8795789		1					0
ENSG00000260205	AL157831.2		5.80895	1.89056	1.48391	0.0497373	1.61947	10	22218074	22221168		1					0
ENSG00000214711	CAPN14	calpain 14	15.1217	4.92747	1.60859	0.00198593	1.61771	2	31173056	31233858							1
ENSG00000229578	LINC00358	long intergenic non-protein coding RNA 358	13.8033	4.51138	1.58513	0.00237643	1.61337	13	62003525	62029548			1				0
ENSG00000136869	TLR4	toll like receptor 4	11.6333	3.80261	1.54744	0.00355078	1.6132	9	117704175	117724730							1
ENSG00000188803	SHISA6	shisa family member 6	9.82084	3.21949	1.60174	0.0169253	1.60901	17	11241263	11564063							1
ENSG00000232204	TET1P1	tet methylcytosine dioxygenase 1 pseudogene 1	6.51199	2.13895	1.64425	0.0462711	1.6062	13	87890172	87892472	1						0
ENSG00000263482	ANTXRLP1	anthrax toxin receptor-like pseudogene 1	6.24944	2.06353	1.5788	0.0295183	1.59861	10	46233885	46273557	1						0
ENSG00000233026	MTCO1P5	mitochondrially encoded cytochrome c oxidase I pseudogene 5	33.5173	11.0755	1.59546		1.59754	3	12165299	12165642	1						0
ENSG00000090376	IRAK3	interleukin 1 receptor associated kinase 3 #or# microRNA 6502 /// interleukin 1 receptor associated kinase 3	8.77396	2.90164	1.56389	0.0140597	1.59636	12	66188879	66254622							1
ENSG00000259921	AC022819.1		6.79729	2.25272	1.50725	0.0266854	1.59329	15	99157231	99161140		1					0
ENSG00000114013	CD86	CD86 molecule	6.51802	2.1611	1.5876	0.0386363	1.59267	3	122055366	122121139							1
ENSG00000148604	RGR	retinal G protein coupled receptor	10.0877	3.34882	1.53078	0.0154515	1.59088	10	84245053	84259960							1
ENSG00000129009	ISLR	immunoglobulin superfamily containing leucine rich repeat	7.29765	2.4257	1.59884	0.0191824	1.58903	15	74173671	74176872							1
ENSG00000187893	CXXC1P1	CXXC finger protein 1 pseudogene 1	8.13715	2.72206	1.5136	0.032073	1.57982	0	47707191	47753456	1						0
ENSG00000036828	CASR	calcium sensing receptor	16.578	5.54763	1.53592	0.00157334	1.57933	3	122183683	122291629							1
ENSG00000224717	AC098936.1		8.75724	2.93934	1.57973	0.0131938	1.57498	1	205455929	205469024		1					0
ENSG00000144619	CNTN4	contactin 4	15.3993	5.18245	1.55403	0.00125512	1.57116	3	2098813	3057956							1
ENSG00000181234	TMEM132C	transmembrane protein 132C	8.00671	2.6969	1.57294	0.0228297	1.56991	12	128267403	128707915							1
ENSG00000272808	AC015712.6		5.51128	1.85879	1.60308	0.0368973	1.56802	15	100849831	100865457		1					0
ENSG00000238002	NPAP1P6	nuclear pore associated protein 1 pseudogene 6	20.8384	7.03465	1.55526	0.000338603	1.56669	9	79863019	79866875	1						0
ENSG00000185905	C16orf54	chromosome 16 open reading frame 54	5.95779	2.02583	1.47448	0.0481728	1.55627	16	29742463	29746006							1
ENSG00000165061	ZMAT4	zinc finger matrin-type 4	8.2415	2.80407	1.51121	0.0307116	1.55538	8	40530590	40897833							1
ENSG00000166984	TCP10L2	t-complex 10 like 2	9.03652	3.07461	1.61021	0.0112542	1.55536	6	167146414	167196913							1
ENSG00000230479	AP000695.1		8.10805	2.75977	1.49831	0.0282309	1.55481	21	36430360	36481070		1					0
ENSG00000248483	POU5F2	POU domain class 5, transcription factor 2	6.43975	2.19286	1.48652	0.0321376	1.55419	5	93733220	93741637							1
ENSG00000243232	PCDHAC2	protocadherin alpha subfamily C, 2	9.06561	3.09082	1.52774	0.0222929	1.55241	5	140966235	141012344							1
ENSG00000279774	AL590483.3		6.60397	2.25272	1.4933	0.0353207	1.55166	1	244064330	244067909		1					0
ENSG00000231768	LINC01354	long intergenic non-protein coding RNA 1354	13.6223	4.64731	1.52187	0.00293123	1.55151	1	234527891	234531779			1				0
ENSG00000152931	PART1	prostate androgen-regulated transcript 1 (non-protein coding) #or# NA /// prostate androgen-regulated transcript 1 (non-protein coding)	12.5434	4.28449	1.56788	0.0032902	1.54973	5	60487713	60547657							1
ENSG00000254519	AC044839.2		6.1006	2.08569	1.56005	0.0427677	1.54843	11	45722308	45744254		1					0
ENSG00000188641	MIR137HG	dihydropyrimidine dehydrogenase #or# MIR137 host gene /// MIR137 host gene /// MIR137 host gene #or# microRNA 137 /// MIR137 host gene #or# microRNA 2682	12.1336	4.14922	1.51565	0.00254896	1.5481	1	97077743	97995000				1			0
ENSG00000285051	AC026316.4		6.66384	2.28082	1.62758	0.017608	1.5468	3	170448639	170860993		1					0
ENSG00000101448	EPPIN	epididymal peptidase inhibitor /// epididymal peptidase inhibitor #or# EPPIN-WFDC6 readthrough	8.40572	2.87948	1.50627	0.0217479	1.54556	20	45540626	45547752							1
ENSG00000235370	DNM1P51	dynamin 1 pseudogene 51 #or# chondroitin sulfate proteoglycan 4 pseudogene 5 /// dynamin 1 pseudogene 51	21.3926	7.33101	1.52091	0.000170655	1.54503	15	84398316	84411701	1						0
ENSG00000197588	KLKP1	kallikrein pseudogene 1	9.05191	3.10638	1.51725	0.0225187	1.54299	19	50882096	50896398	1						0
ENSG00000242715	CCDC169	coiled-coil domain containing 169	11.0286	3.78706	1.47444	0.00628158	1.5421	13	36222008	36297840							1
ENSG00000230006	ANKRD36BP2	ankyrin repeat domain 36B pseudogene 2	8.83383	3.03691	1.54941	0.0165473	1.54044	2	88765807	88806612	1						0
ENSG00000258834	DUX4L4	double homeobox 4 like 4	8.40271	2.90164	1.53147	0.0179208	1.53399	4	190081118	190082386							1
ENSG00000278972	AC015920.1		5.26411	1.82109	1.48418	0.0449411	1.53139	17	69433084	69435533		1					0
ENSG00000196604	POTEF	POTE ankyrin domain family member F	7.43109	2.57718	1.48544	0.0392245	1.52778	2	130074030	130129222							1
ENSG00000225963	AC009950.1		4.87747	1.69176	1.63882	0.0444797	1.52761	2	230121370	230174223		1					0
ENSG00000140563	MCTP2	multiple C2 and transmembrane domain containing 2	16.5519	5.74342	1.45346	0.00151468	1.52702	15	94231538	94483952							1
ENSG00000175084	DES	desmin	5.7046	1.99406	1.59715	0.0405077	1.51641	2	219418377	219426739							1
ENSG00000104972	LILRB1	leukocyte immunoglobulin like receptor B1	12.6123	4.41382	1.44633	0.00852123	1.51473	19	54617158	54637528							1
ENSG00000152583	SPARCL1	SPARC like 1	6.5441	2.29043	1.48327	0.0434658	1.51458	4	87473335	87531061							1
ENSG00000215018	COL28A1	collagen type XXVIII alpha 1 chain	9.39105	3.30151	1.54397	0.00898215	1.50816	7	7356203	7535853							1
ENSG00000261534	AL596244.1		6.39827	2.25272	1.43337	0.0376688	1.50601	9	121815674	121819452		1					0
ENSG00000267541	MTCO2P2	mitochondrially encoded cytochrome c oxidase II pseudogene 2	115.68	40.8478	1.50105	0.000139175	1.5018	18	47853233	47853457	1						0
ENSG00000283213	AC130466.1		11.2219	3.97624	1.40388	0.0100824	1.49684	16	22806289	22813680		1					0
ENSG00000205488	CALML3-AS1	CALML3 antisense RNA 1	8.87832	3.16029	1.37383	0.0328388	1.49023	10	5514244	5526246							1
ENSG00000183117	CSMD1	CUB and Sushi multiple domains 1	20.4778	7.2933	1.4614	0.000355061	1.48942	8	2935353	4994972							1
ENSG00000257853	MED15P1	mediator complex subunit 15 pseudogene 1	7.97593	2.84178	1.45243	0.0298155	1.48886	14	18912805	18916642	1						0
ENSG00000267659	LINC01482	long intergenic non-protein coding RNA 1482	7.29765	2.60527	1.58058	0.0163646	1.486	17	68591796	68763882			1				0
ENSG00000166049	PASD1	PAS domain containing repressor 1 /// PAS domain containing repressor 1 #or# NA	6.22034	2.22096	1.54468	0.0394906	1.48581	0	151563622	151676739							1
ENSG00000148677	ANKRD1	ankyrin repeat domain 1	9.5429	3.41528	1.44068	0.0255279	1.48242	10	90912096	90921276							1
ENSG00000243064	ABCC13	ATP binding cassette subfamily C member 13 (pseudogene)	12.3116	4.41382	1.4418	0.0059613	1.47992	21	14236206	14362754	1						0
ENSG00000210164	MT-TG	mitochondrially encoded cytochrome c oxidase III #or# mitochondrially encoded tRNA glycine /// mitochondrially encoded NADH:ubiquinone oxidoreductase core subunit 3 #or# mitochondrially encoded tRNA glycine /// mitochondrially encoded tRNA glycine	5222.58	1874.28	1.47827	4.21642e-06	1.47842	0	9991	10058						1	0
ENSG00000229604	MTATP8P2	mitochondrially encoded ATP synthase 8 pseudogene 2	210.761	75.6861	1.47312	5.97054e-05	1.47751	2	87824942	87825143	1						0
ENSG00000237250	AL359924.1		6.64544	2.38799	1.50792	0.0403267	1.47657	1	237862175	237928321		1					0
ENSG00000231877	AL359551.1		8.0649	2.90164	1.45466	0.03204	1.47479	1	238485445	238538305		1					0
ENSG00000227471	AKR1B15	aldo-keto reductase family 1 member B15	10.4991	3.78339	1.54625	0.00999204	1.47252	7	134549136	134579875							1
ENSG00000172061	LRRC15	leucine rich repeat containing 15	9.61816	3.46854	1.42969	0.0210209	1.47143	3	194355247	194369743							1
ENSG00000109846	CRYAB	crystallin alpha B	9.96634	3.59787	1.34816	0.0437514	1.46992	11	111908565	111923722							1
ENSG00000254162	AC009812.3		7.39899	2.68069	1.59316	0.0250253	1.46473	8	80535006	80539135		1					0
ENSG00000162692	VCAM1	vascular cell adhesion molecule 1	15.995	5.80922	1.50618	0.000899953	1.46121	1	100719742	100739045							1
ENSG00000256069	A2MP1	alpha-2-macroglobulin pseudogene 1	8.29969	3.01475	1.48395	0.0234927	1.46102	12	9228533	9275817	1						0
ENSG00000080166	DCT	dopachrome tautomerase	24.677	8.96951	1.45696	0.00015852	1.46007	13	94436808	94479682							1
ENSG00000185274	GALNT17	polypeptide N-acetylgalactosaminyltransferase 17	7.3545	2.67474	1.48638	0.030041	1.45923	7	71132169	71713600							1
ENSG00000182557	SPNS3	sphingolipid transporter 3 (putative)	6.18957	2.25272	1.41683	0.0419596	1.45817	17	4433688	4488208							1
ENSG00000231645	KRT17P6	keratin 17 pseudogene 6	9.18535	3.34581	1.49865	0.0178628	1.45698	17	20512560	20517479	1						0
ENSG00000076258	FMO4	flavin containing monooxygenase 4	8.32311	3.03691	1.54916	0.0192738	1.45452	1	171314208	171342084							1
ENSG00000262902	MTCO1P40	mitochondrially encoded cytochrome c oxidase I pseudogene 40	232.793	84.9912	1.45175	2.20257e-05	1.45366	17	53105734	53106358	1						0
ENSG00000146166	LGSN	lengsin, lens protein with glutamine synthetase domain	9.0994	3.33327	1.38412	0.0253793	1.44883	6	63275951	63319977							1
ENSG00000258754	LINC01579	long intergenic non-protein coding RNA 1579	11.0577	4.05166	1.38614	0.0102681	1.44846	15	93718542	94070820			1				0
ENSG00000225649	AC064875.1		6.47353	2.37244	1.42309	0.0436914	1.44818	2	12966784	13007013		1					0
ENSG00000210135	MT-TN	mitochondrially encoded tRNA asparagine #or# mitochondrially encoded tRNA cysteine /// mitochondrially encoded tRNA alanine #or# mitochondrially encoded tRNA asparagine /// mitochondrially encoded tRNA asparagine	2783.71	1022.85	1.44414	3.41041e-06	1.44442	0	5657	5729						1	0
ENSG00000213203	GIMAP1	GTPase, IMAP family member 1 /// GTPase, IMAP family member 1 #or# GIMAP1-GIMAP5 readthrough	9.74859	3.58826	1.45051	0.0174666	1.44191	7	150716557	150724284							1
ENSG00000189275	LINC01164	long intergenic non-protein coding RNA 1164	10.0446	3.70505	1.3476	0.048616	1.43886	10	131772398	131790199			1				0
ENSG00000210140	MT-TC	mitochondrially encoded tRNA cysteine	360.902	133.352	1.43428	1.86007e-05	1.43637	0	5761	5826						1	0
ENSG00000277436	REXO1L5P	REXO1 like 5, pseudogene	20.5086	7.58006	1.41066	0.000708114	1.43595	8	85814767	85818783	1						0
ENSG00000204740	MALRD1	MAM and LDL receptor class A domain containing 1	17.4131	6.43664	1.43763	0.00101476	1.4358	10	19048771	19790401							1
ENSG00000125675	GRIA3	glutamate ionotropic receptor AMPA type subunit 3	13.2999	4.92747	1.39067	0.00535568	1.4325	0	123184153	123490915							1
ENSG00000197993	KEL	Kell metallo-endopeptidase (Kell blood group)	10.8289	4.01989	1.37785	0.0159396	1.42966	7	142941114	142962681							1
ENSG00000247627	MTND4P12	mitochondrially encoded NADH:ubiquinone oxidoreductase core subunit 4L pseudogene 30 #or# mitochondrially encoded NADH:ubiquinone oxidoreductase core subunit 4 pseudogene 12 /// mitochondrially encoded NADH:ubiquinone oxidoreductase core subunit 4 pseudogene 12	803.336	298.273	1.42864	4.09965e-07	1.42937	5	134926660	134928036	1						0
ENSG00000243130	PSG11	pregnancy specific beta-1-glycoprotein 11	9.7807	3.63558	1.3576	0.0318322	1.42775	19	43007656	43026512							1
ENSG00000276386	CNTNAP3P2	contactin associated protein-like 3 pseudogene 2	10.4393	3.88462	1.38509	0.0118306	1.42617	9	67059560	67293468	1						0
ENSG00000233920	AL162595.2		9.72718	3.62002	1.41928	0.00968353	1.42602	1	229223461	229227562		1					0
ENSG00000251340	MTCYBP35	mitochondrially encoded cytochrome b pseudogene 35	9.50444	3.53801	1.28848	0.0339773	1.42566	5	94569540	94570676	1						0
ENSG00000210154	MT-TD	mitochondrially encoded tRNA aspartic acid /// mitochondrially encoded cytochrome c oxidase II #or# mitochondrially encoded tRNA aspartic acid	3578.99	1333.58	1.42403	3.08619e-06	1.42425	0	7518	7585						1	0
ENSG00000279091	AC026523.2		7.14881	2.67474	1.43978	0.0264405	1.4183	15	97533738	97541476		1					0
ENSG00000146147	MLIP	muscular LMNA interacting protein	7.5602	2.83217	1.51818	0.0196881	1.41652	6	53929982	54266280							1
ENSG00000279520	AC093525.8		8.54552	3.20394	1.4584	0.027445	1.41532	16	2516658	2517999		1					0
ENSG00000276006	REXO1L12P	REXO1 like 12, pseudogene	24.9332	9.35317	1.43441	0.000223921	1.41454	8	85714922	85715833	1						0
ENSG00000153046	CDYL	chromodomain Y like	11.7898	4.42636	1.47839	0.00589079	1.41335	6	4706159	4955551							1
ENSG00000257127	CLLU1	chronic lymphocytic leukemia up-regulated 1 #or# NA /// chronic lymphocytic leukemia up-regulated 1	7.66455	2.87948	1.41302	0.0330057	1.41239	12	92421531	92431002							1
ENSG00000101825	MXRA5	matrix remodeling associated 5	11.8865	4.47368	1.37555	0.0131143	1.40979	0	3308565	3346641							1
ENSG00000258588	TRIM6-TRIM34	tripartite motif containing 6 #or# TRIM6-TRIM34 readthrough /// TRIM6-TRIM34 readthrough #or# tripartite motif containing 34	9.42015	3.55055	1.43685	0.0113344	1.40771	11	5596725	5644398							1
ENSG00000188487	INSC	INSC, spindle orientation adaptor protein	7.78261	2.9334	1.33268	0.0392421	1.40768	11	15112424	15247208							1
ENSG00000174450	GOLGA6L2	golgin A6 family-like 2	7.59231	2.86393	1.38538	0.0398023	1.40654	15	23439498	23447234							1
ENSG00000091010	POU4F3	POU class 4 homeobox 3 /// POU class 4 homeobox 3 #or# NA	6.60698	2.49517	1.29462	0.04865	1.40485	5	146338839	146341722							1
ENSG00000260458	KCNJ18	potassium voltage-gated channel subfamily J member 18	7.26855	2.75016	1.43292	0.0339948	1.40215	17	21692523	21704612							1
ENSG00000168542	COL3A1	collagen type III alpha 1 chain	13.4611	5.10044	1.40072	0.0044754	1.40011	2	188974320	189012746							1
ENSG00000184719	RNLS	renalase, FAD dependent amine oxidase	7.74114	2.93934	1.38339	0.0270243	1.39705	10	88273864	88584530							1
ENSG00000139364	TMEM132B	transmembrane protein 132B	15.2291	5.79667	1.3803	0.00532703	1.39353	12	125186836	125662377							1
ENSG00000232177	MTND4P24	mitochondrially encoded NADH:ubiquinone oxidoreductase core subunit 4 pseudogene 24	22.0986	8.44626	1.41417	0.000185287	1.38757	0	126472885	126473281	1						0
ENSG00000255833	TIFAB	TIFA inhibitor /// dendritic cell associated nuclear protein #or# TIFA inhibitor	11.5473	4.41382	1.33246	0.00945857	1.38746	5	135444218	135452399							1
ENSG00000256542	AC148477.2		7.15182	2.7346	1.39652	0.0450491	1.38698	12	132277349	132280900		1					0
ENSG00000144407	PTH2R	parathyroid hormone 2 receptor	11.6363	4.45153	1.34395	0.0178636	1.38626	2	208359714	208854503							1
ENSG00000143429	AC116050.1		9.74257	3.7272	1.33447	0.0205775	1.38621	2	91617160	91659972		1					0
ENSG00000146276	GABRR1	gamma-aminobutyric acid type A receptor rho1 subunit	7.60769	2.91125	1.28476	0.046636	1.38582	6	89177501	89231278							1
ENSG00000197576	HOXA4	homeobox A4	13.5534	5.19206	1.411	0.00506874	1.38428	7	27128507	27130799							1
ENSG00000284196	AL158064.1		17.4008	6.67248	1.36327	0.00134706	1.38286	13	80041725	80074557		1					0
ENSG00000224904	AL021155.1		8.19702	3.14408	1.36411	0.0385015	1.38246	1	11877770	11880406		1					0
ENSG00000270906	MTND4P35	mitochondrially encoded NADH:ubiquinone oxidoreductase core subunit 4L pseudogene 5 #or# mitochondrially encoded NADH:ubiquinone oxidoreductase core subunit 4 pseudogene 35 /// mitochondrially encoded NADH:ubiquinone oxidoreductase core subunit 4 pseudogene 35	93.0964	35.72	1.37292	2.96436e-05	1.382	5	100048988	100050362	1						0
ENSG00000158352	SHROOM4	shroom family member 4	11.561	4.43597	1.33801	0.010899	1.38195	0	50591647	50814302							1
ENSG00000164458	TBXT	T-box transcription factor T	7.41739	2.84772	1.43418	0.0287613	1.3811	6	166157656	166168700							1
ENSG00000248713	C4orf54	chromosome 4 open reading frame 54	11.2543	4.3222	1.44699	0.0101457	1.38064	4	99636529	99654648							1
ENSG00000253305	PCDHGB6	protocadherin gamma subfamily B, 6	7.29765	2.80407	1.33351	0.0442394	1.37991	5	141408021	141512979							1
ENSG00000169436	COL22A1	collagen type XXII alpha 1 chain	16.4766	6.33247	1.32925	0.00499719	1.37958	8	138588235	138914006							1
ENSG00000145864	GABRB2	gamma-aminobutyric acid type A receptor beta2 subunit	13.8448	5.32139	1.31602	0.00552053	1.37946	5	161288429	161549044							1
ENSG00000169035	KLK7	kallikrein related peptidase 7	8.47629	3.2638	1.40191	0.0257556	1.37688	19	50976482	50984099							1
ENSG00000202257	RNA5S16	RNA, 5S ribosomal 16	19.4895	7.50464	1.3445	0.000733323	1.37684	1	228643809	228643927							1
ENSG00000172247	C1QTNF4	C1q and TNF related 4	6.70832	2.58312	1.45313	0.0333338	1.37684	11	47589664	47594659							1
ENSG00000143318	CASQ1	calsequestrin 1	9.54892	3.67988	1.28437	0.0392479	1.37568	1	160190556	160201886							1
ENSG00000092054	MYH7	myosin heavy chain 7	58.4515	22.5263	1.36657		1.37563	14	23412738	23435718							1
ENSG00000164488	DACT2	dishevelled binding antagonist of beta catenin 2	10.5128	4.05166	1.31267	0.0208052	1.37557	6	168292830	168319754							1
ENSG00000210117	MT-TW	mitochondrially encoded tRNA tryptophan	575.747	221.902	1.37617	1.10407e-06	1.37551	0	5512	5579						1	0
ENSG00000221970	OR2A1	olfactory receptor family 2 subfamily A member 1	7.81941	3.01475	1.34206	0.0359037	1.37502	7	144312464	144322668							1
ENSG00000142224	IL19	interleukin 19	9.24522	3.56611	1.38938	0.0292792	1.37436	1	206798870	206842981							1
ENSG00000229344	MTCO2P12	mitochondrially encoded cytochrome c oxidase II pseudogene 12	3640.53	1404.44	1.37396	5.35286e-06	1.37416	1	632757	633438	1						0
ENSG00000278791	MIR6723	microRNA 6723	329.173	127.017	1.36805	1.18608e-07	1.37383	1	632325	632413				1			0
ENSG00000179796	LRRC3B	leucine rich repeat containing 3B	7.79499	3.00881	1.34918	0.0377006	1.37335	3	26622806	26710776							1
ENSG00000168959	GRM5	glutamate metabotropic receptor 5	8.53315	3.29556	1.34548	0.0188938	1.37255	11	88504576	89065945							1
ENSG00000183638	RP1L1	RP1 like 1	11.2343	4.34435	1.39018	0.00686164	1.37069	8	10606349	10712187							1
ENSG00000198840	MT-ND3	mitochondrially encoded NADH:ubiquinone oxidoreductase core subunit 3 #or# mitochondrially encoded tRNA arginine /// mitochondrially encoded NADH:ubiquinone oxidoreductase core subunit 3 #or# mitochondrially encoded tRNA arginine #or# mitochondrially encoded NADH:ubiquinone oxidoreductase core subunit 4L /// mitochondrially encoded NADH:ubiquinone oxidoreductase core subunit 3	11762.5	4554.33	1.36883	8.52194e-06	1.36888	0	10059	10404						1	0
ENSG00000224743	TEX26-AS1	TEX26 antisense RNA 1	9.27432	3.59193	1.25137	0.0372263	1.36848	13	30881933	30933846							1
ENSG00000166592	RRAD	RRAD, Ras related glycolysis inhibitor and calcium channel regulator	9.00574	3.49069	1.38715	0.0247051	1.36733	16	66921679	66925644							1
ENSG00000144285	SCN1A	sodium voltage-gated channel alpha subunit 1	18.6055	7.21195	1.29416	0.00185797	1.36727	2	165984641	166149214							1
ENSG00000210144	MT-TY	mitochondrially encoded tRNA cysteine #or# mitochondrially encoded tRNA tyrosine /// mitochondrially encoded tRNA tyrosine	3411.96	1322.95	1.3667	7.84284e-06	1.36684	0	5826	5891						1	0
ENSG00000234229	LINC01505	long intergenic non-protein coding RNA 1505 /// long intergenic non-protein coding RNA 1505 #or# long intergenic non-protein coding RNA 1505	8.78935	3.40868	1.31546	0.0207185	1.36654	9	106664754	106702662			1				0
ENSG00000116996	ZP4	zona pellucida glycoprotein 4	9.88505	3.83731	1.33768	0.0281193	1.36516	1	237877864	237890922							1
ENSG00000203620	AL354919.1		10.1797	3.95409	1.23985	0.0370856	1.36428	1	31842019	31855568		1					0
ENSG00000285492	AL356417.3		21.1394	8.24453	1.36013	0.000585494	1.35843	6	159051674	159121495		1					0
ENSG00000261222	AC064805.1		9.12548	3.56016	1.3114	0.0309552	1.35796	17	74599840	74607229		1					0
ENSG00000238230	LINC00391	long intergenic non-protein coding RNA 391	7.15182	2.79446	1.38823	0.0414703	1.35574	13	94699694	94702862			1				0
ENSG00000234680	VN2R3P	vomeronasal 2 receptor 3, pseudogene	9.968	3.90017	1.3191	0.0458287	1.35376	9	39016969	39039594	1						0
ENSG00000176302	FOXR1	forkhead box R1	6.31232	2.47	1.35217	0.0462008	1.35366	11	118971707	118981291							1
ENSG00000179082	C9orf106	chromosome 9 open reading frame 106 (putative)	9.99275	3.91639	1.28867	0.0218372	1.35136	9	129321016	129324905							1
ENSG00000173193	PARP14	poly(ADP-ribose) polymerase family member 14	12.5113	4.90531	1.35112	0.00694671	1.35081	3	122680618	122730840							1
ENSG00000255794	RMST	rhabdomyosarcoma 2 associated transcript (non-protein coding)	8.43783	3.31112	1.25419	0.0472305	1.34955	12	97430884	97598415							1
ENSG00000228253	MT-ATP8	mitochondrially encoded ATP synthase membrane subunit 8 /// mitochondrially encoded tRNA lysine #or# mitochondrially encoded ATP synthase membrane subunit 8	5334.45	2094.69	1.34848	6.50624e-06	1.3486	0	8366	8572						1	0
ENSG00000184774	MGAT4EP	MGAT4 family member E, pseudogene	7.38661	2.90164	1.33028	0.0491427	1.34805	1	202820266	202827225	1						0
ENSG00000177992	SPATA31E1	SPATA31 subfamily E member 1	13.1126	5.15436	1.28085	0.0148605	1.34709	9	87882826	87888899							1
ENSG00000187048	CYP4A11	cytochrome P450 family 4 subfamily A member 11	6.5441	2.57718	1.32753	0.0499843	1.3444	1	46929177	46941484							1
ENSG00000282961	PRNCR1	prostate cancer associated non-coding RNA 1	7.21169	2.84178	1.27962	0.0455611	1.34354	8	127079874	127092600							1
ENSG00000272341	AL137003.2		13.1126	5.16991	1.26603	0.00896002	1.34274	6	16764346	16766883		1					0
ENSG00000111704	NANOG	Nanog homeobox	11.4413	4.51138	1.32915	0.0212892	1.34261	12	7787794	7799141							1
ENSG00000260103	AC012435.1		13.3568	5.26748	1.32962	0.00723276	1.34239	15	74478070	74490286		1					0
ENSG00000104324	CPQ	carboxypeptidase Q	7.80403	3.08422	1.2386	0.0460425	1.33931	8	96645227	97149654							1
ENSG00000170075	GPR37L1	G protein-coupled receptor 37 like 1	20.7404	8.20088	1.30743	0.0010132	1.33859	1	202122858	202133592							1
ENSG00000204677	FAM153C	family with sequence similarity 153 member C	7.05048	2.78786	1.34048	0.0488	1.33856	5	178006405	178055559							1
ENSG00000275928	REXO1L11P	REXO1 like 11, pseudogene	43.2872	17.1386	1.32326	4.8257e-06	1.33669	8	85733419	85737278	1						0
ENSG00000210196	MT-TP	mitochondrially encoded tRNA proline	3721.58	1474.22	1.33574	1.18418e-05	1.33597	0	15956	16023						1	0
ENSG00000204175	GPRIN2	G protein regulated inducer of neurite outgrowth 2	19.3774	7.68422	1.30966	0.00221673	1.33441	10	46549044	46555530							1
ENSG00000209082	MT-TL1	mitochondrially encoded tRNA leucine 1 (UUA/G) #or# mitochondrially encoded 16S RNA /// mitochondrially encoded tRNA leucine 1 (UUA/G)	2772.36	1100.91	1.33211	1.04306e-05	1.33241	0	3230	3304						1	0
ENSG00000160856	FCRL3	Fc receptor like 3	9.68571	3.84692	1.29502	0.0223561	1.33216	1	157674321	157700857							1
ENSG00000210195	MT-TT	mitochondrially encoded tRNA threonine	1699.57	675.066	1.33164	1.39149e-05	1.33207	0	15888	15953						1	0
ENSG00000270416	REXO1L4P	REXO1 like 4, pseudogene	21.4187	8.50912	1.3342	0.00155999	1.33179	8	85802574	85806435	1						0
ENSG00000210176	MT-TH	mitochondrially encoded tRNA histidine #or# mitochondrially encoded tRNA serine 2 (AGU/C) /// mitochondrially encoded tRNA histidine	2482.04	986.433	1.33096	3.47599e-06	1.33123	0	12138	12206						1	0
ENSG00000146950	SHROOM2	shroom family member 2	18.6931	7.43518	1.33075	0.0036266	1.33007	0	9786456	9949443							1
ENSG00000269028	MTRNR2L12	MT-RNR2 like 12	578.731	230.397	1.3277	1.1419e-06	1.32877	3	96617188	96618236							1
ENSG00000183844	FAM3B	family with sequence similarity 3 member B	8.00671	3.18839	1.31451	0.0393042	1.32838	21	41304212	41357431							1
ENSG00000210151	MT-TS1	mitochondrially encoded tRNA serine 1 (UCN)	929.094	370.502	1.32548	1.15695e-05	1.32634	0	7446	7514						1	0
ENSG00000272230	MIR3666	microRNA 3666	7.34514	2.92973	1.38888	0.0289377	1.32602	7	114653345	114653455				1			0
ENSG00000210107	MT-TQ	mitochondrially encoded tRNA glutamine	1846.1	736.806	1.32483	6.94769e-06	1.32512	0	4329	4400						1	0
ENSG00000244921	MTCYBP18	mitochondrially encoded cytochrome b pseudogene 18	39.3797	15.727	1.31411	0.00329135	1.32421	5	134923303	134924049	1						0
ENSG00000260971	AC119674.1		14.4003	5.75897	1.31598	0.00756257	1.32222	1	56154545	56477687		1					0
ENSG00000134716	CYP2J2	cytochrome P450 family 2 subfamily J member 2	20.0082	8.00208	1.31106	0.000638463	1.32215	1	59893308	59926790							1
ENSG00000185737	NRG3	neuregulin 3	10.3071	4.12707	1.2733	0.0343779	1.32046	10	81875314	82987179							1
ENSG00000156076	WIF1	WNT inhibitory factor 1	8.2124	3.2919	1.43636	0.0234199	1.31889	12	65050626	65121566							1
ENSG00000204262	COL5A2	collagen type V alpha 2 chain	15.8017	6.34208	1.27823	0.0030727	1.31705	2	189031896	189179879							1
ENSG00000198712	MT-CO2	mitochondrially encoded cytochrome c oxidase II #or# mitochondrially encoded tRNA lysine /// mitochondrially encoded cytochrome c oxidase II	19324.2	7764.36	1.31543	1.0529e-05	1.31547	0	7586	8269						1	0
ENSG00000225630	MTND2P28	mitochondrially encoded NADH:ubiquinone oxidoreductase core subunit 2 pseudogene 28	9211.83	3701.29	1.31538	1.42206e-05	1.31546	1	629640	630683	1						0
ENSG00000210191	MT-TL2	mitochondrially encoded tRNA histidine #or# mitochondrially encoded tRNA serine 2 (AGU/C) #or# mitochondrially encoded tRNA leucine 2 (CUN) /// mitochondrially encoded NADH:ubiquinone oxidoreductase core subunit 5 #or# mitochondrially encoded tRNA leucine 2 (CUN) /// mitochondrially encoded tRNA serine 2 (AGU/C) #or# mitochondrially encoded tRNA leucine 2 (CUN) /// mitochondrially encoded tRNA le…	4056.37	1633.49	1.31207	9.49754e-06	1.31223	0	12266	12336						1	0
ENSG00000197223	C1D	C1D nuclear receptor corepressor	11.7483	4.73234	1.2457	0.0106809	1.31183	2	68041130	68110948							1
ENSG00000156298	TSPAN7	tetraspanin 7 /// tetraspanin 7 #or# NA	9.14087	3.68582	1.37448	0.0171414	1.31034	0	38561370	38688920							1
ENSG00000185291	IL3RA	interleukin 3 receptor subunit alpha	15.209	6.13367	1.30553	0.00464229	1.31011	0	1336616	1382689							1
ENSG00000072201	LNX1	ligand of numb-protein X 1	6.86652	2.77231	1.40316	0.0311219	1.30849	4	53459301	53701405							1
ENSG00000173262	SLC2A14	solute carrier family 2 member 14	10.7754	4.35396	1.27767	0.0215634	1.30734	12	7812512	7891148							1
ENSG00000201183	RNVU1-3	RNA, variant U1 small nuclear 3	10.0235	4.05166	1.27396	0.0277935	1.30681	1	148402715	148402875							1
ENSG00000170298	LGALS9B	galectin 9B	7.48795	3.0273	1.43795	0.0412638	1.30654	17	20449395	20467539							1
ENSG00000130382	MLLT1	MLLT1, super elongation complex subunit	13.7143	5.54462	1.32616	0.00655745	1.30652	19	6210379	6279948							1
ENSG00000198938	MT-CO3	mitochondrially encoded cytochrome c oxidase III	21894.4	8856.48	1.30573	1.20397e-05	1.30576	0	9207	9990						1	0
ENSG00000134121	CHL1	cell adhesion molecule L1 like	15.0127	6.08343	1.27149	0.00676984	1.30323	3	196596	409417							1
ENSG00000212907	MT-ND4L	mitochondrially encoded NADH:ubiquinone oxidoreductase core subunit 4L /// mitochondrially encoded tRNA arginine #or# mitochondrially encoded NADH:ubiquinone oxidoreductase core subunit 4L	12695.3	5149.97	1.3016	7.52671e-06	1.30166	0	10470	10766						1	0
ENSG00000122176	FMOD	fibromodulin	9.42951	3.83071	1.36268	0.0290658	1.29957	1	203340628	203351489							1
ENSG00000254132	MTND6P3	mitochondrially encoded NADH:ubiquinone oxidoreductase core subunit 6 pseudogene 3	82.3117	33.4642	1.29367	0.00146356	1.29848	5	94568929	94569470	1						0
ENSG00000227115	LINC01630	long intergenic non-protein coding RNA 1630	6.70832	2.728	1.31624	0.0467312	1.29811	18	51346249	51643939			1				0
ENSG00000210156	MT-TK	mitochondrially encoded tRNA lysine	891.779	362.672	1.29681	1.35852e-06	1.29802	0	8295	8364						1	0
ENSG00000143520	FLG2	filaggrin family member 2	10.4653	4.2564	1.2458	0.0214563	1.29791	1	152348735	152360006							1
ENSG00000277914	DDX6P2	DEAD-box helicase 6 pseudogene 2	9.53386	3.88462	1.30027	0.0481629	1.29529	13	86275493	86277262	1						0
ENSG00000237973	MTCO1P12	mitochondrially encoded cytochrome c oxidase I pseudogene 12	12307.8	5016.72	1.29469	9.04696e-06	1.29476	1	631074	632616	1						0
ENSG00000250986	AC141928.1		8.11106	3.31112	1.21932	0.0468035	1.29257	4	3758748	3763390		1					0
ENSG00000154608	CEP170P1	centrosomal protein 170 pseudogene 1	8.40271	3.43084	1.29006	0.0286902	1.2923	4	118467590	118554100	1						0
ENSG00000160185	UBASH3A	ubiquitin associated and SH3 domain containing A	8.40271	3.43084	1.28993	0.0311617	1.2923	21	42403447	42447681							1
ENSG00000198886	MT-ND4	mitochondrially encoded NADH:ubiquinone oxidoreductase core subunit 4 #or# mitochondrially encoded NADH:ubiquinone oxidoreductase core subunit 4L /// mitochondrially encoded NADH:ubiquinone oxidoreductase core subunit 4 #or# mitochondrially encoded tRNA histidine /// mitochondrially encoded NADH:ubiquinone oxidoreductase core subunit 4	47994.8	19597	1.29223	1.08104e-05	1.29224	0	10760	12137						1	0
ENSG00000163554	SPTA1	spectrin alpha, erythrocytic 1	15.9599	6.51799	1.38269	0.00310783	1.29195	1	158610706	158686715							1
ENSG00000198786	MT-ND5	mitochondrially encoded NADH:ubiquinone oxidoreductase core subunit 5	58408.4	23876	1.2906	1.39951e-05	1.29061	0	12337	14148						1	0
ENSG00000196689	TRPV1	transient receptor potential cation channel subfamily V member 1 #or# NA /// transient receptor potential cation channel subfamily V member 1 #or# sedoheptulokinase /// transient receptor potential cation channel subfamily V member 1 /// transient receptor potential cation channel subfamily V member 1 #or# sedoheptulokinase #or# NA	9.12548	3.73314	1.28841	0.0238865	1.28951	17	3565444	3609411							1
ENSG00000158428	CATIP	ciliogenesis associated TTC17 interacting protein	12.9454	5.30518	1.2703	0.0105921	1.28696	2	218356856	218368099							1
ENSG00000009790	TRAF3IP3	TRAF3 interacting protein 3	12.5741	5.15436	1.26295	0.0113263	1.28659	1	209756032	209782320							1
ENSG00000163145	C1QTNF7	C1q and TNF related 7	6.85415	2.81001	1.35694	0.0433653	1.2864	4	15339818	15446166							1
ENSG00000211896	IGHG1	immunoglobulin heavy constant gamma 1 (G1m marker)	10.0279	4.11152	1.22472	0.0284033	1.28627	14	105736343	105743071							1
ENSG00000225684	FAM225B	family with sequence similarity 225 member B (non-protein coding)	12.0169	4.92747	1.24499	0.0123511	1.28615	9	113103338	113111500							1
ENSG00000280356	AL021877.2		9.47065	3.88462	1.20412	0.040536	1.28569	22	34641179	34651862		1					0
ENSG00000186094	AGBL4	ATP/GTP binding protein like 4	12.8534	5.27408	1.28848	0.0103118	1.28516	1	48532855	50023913							1
ENSG00000198804	MT-CO1	mitochondrially encoded cytochrome c oxidase I	48025.5	19711.9	1.28472	6.99056e-06	1.28473	0	5904	7445						1	0
ENSG00000283380	AL807742.1		9.68571	3.98219	1.28054	0.0184271	1.2823	0	20769718	21374265		1					0
ENSG00000150394	CDH8	cadherin 8	12.7551	5.24532	1.24455	0.0116108	1.28197	16	61647242	62037035							1
ENSG00000198899	MT-ATP6	mitochondrially encoded ATP synthase membrane subunit 6 #or# mitochondrially encoded ATP synthase membrane subunit 8 /// mitochondrially encoded ATP synthase membrane subunit 6 /// mitochondrially encoded ATP synthase membrane subunit 6 #or# mitochondrially encoded cytochrome c oxidase III	20388.3	8386.98	1.28149	1.07261e-05	1.28152	0	8527	9207						1	0
ENSG00000180178	FAR2P1	fatty acyl-CoA reductase 2 pseudogene 1 /// fatty acyl-CoA reductase 2 pseudogene 1 #or# NA	8.50707	3.5003	1.20876	0.0367386	1.28118	2	129990456	130051131	1						0
ENSG00000210082	MT-RNR2	mitochondrially encoded 16S RNA	55021.5	22682.8	1.27838	1.73087e-05	1.2784	0	1671	3229						1	0
ENSG00000156920	ADGRG4	adhesion G protein-coupled receptor G4	13.2233	5.45666	1.25817	0.0112514	1.27699	0	136300963	136416888							1
ENSG00000197915	HRNR	hornerin	32.3262	13.342	1.30976	3.31998e-05	1.27673	1	152212082	152224193							1
ENSG00000279905	AC063926.3		9.53687	3.93788	1.27222	0.0311502	1.2761	12	130425004	130430661		1					0
ENSG00000152936	LMNTD1	lamin tail domain containing 1 /// lamin tail domain containing 1 #or# NA	7.99132	3.30151	1.29906	0.0325772	1.27531	12	25409307	25648579							1
ENSG00000115648	MLPH	melanophilin	13.3123	5.50031	1.3075	0.0082652	1.27517	2	237485428	237555318							1
ENSG00000248527	MTATP6P1	mitochondrially encoded ATP synthase 6 pseudogene 1 /// mitochondrially encoded ATP synthase 8 pseudogene 1 #or# mitochondrially encoded ATP synthase 6 pseudogene 1	6139.27	2545.2	1.27019	7.38025e-06	1.27029	1	633696	634376	1						0
ENSG00000248923	MTND5P11	mitochondrially encoded NADH:ubiquinone oxidoreductase core subunit 5 pseudogene 11	314.05	130.214	1.26756	0.000103935	1.27011	5	134924648	134926459	1						0
ENSG00000108774	AC099811.2	lysine acetyltransferase 2A #or# NA /// RAB5C, member RAS oncogene family #or# NA	6.63173	2.75016	1.34269	0.0437274	1.26987	17	42124976	42155044							1
ENSG00000232057	AC093390.1		10.5098	4.36056	1.24414	0.0284712	1.26915	2	1824412	1828667		1					0
ENSG00000147246	HTR2C	5-hydroxytryptamine receptor 2C	9.86063	4.0953	1.30317	0.0255313	1.26771	0	114584078	114910061							1
ENSG00000124440	HIF3A	hypoxia inducible factor 3 subunit alpha	13.4166	5.57939	1.21083	0.0137188	1.26584	19	46297046	46343433							1
ENSG00000134757	DSG3	desmoglein 3	12.3009	5.11599	1.24259	0.0177799	1.26568	18	31447795	31478702							1
ENSG00000167077	MEI1	meiotic double-stranded break formation protein 1	19.0553	7.93261	1.32149	0.000899889	1.26433	22	41699499	41799456							1
ENSG00000198763	MT-ND2	mitochondrially encoded NADH:ubiquinone oxidoreductase core subunit 2 #or# mitochondrially encoded tRNA tryptophan /// mitochondrially encoded NADH:ubiquinone oxidoreductase core subunit 2	26343.1	10966.6	1.26429	2.20455e-05	1.26431	0	4470	5511						1	0
ENSG00000073464	CLCN4	chloride voltage-gated channel 4	11.0132	4.5868	1.26946	0.0190562	1.26367	0	10156945	10237660							1
ENSG00000198695	MT-ND6	mitochondrially encoded NADH:ubiquinone oxidoreductase core subunit 6	10741.8	4474.35	1.26343	2.7989e-05	1.26349	0	14149	14673						1	0
ENSG00000235726	AC010148.1		8.83082	3.67988	1.2477	0.030624	1.26289	2	234834315	234913384		1					0
ENSG00000186526	CYP4F8	cytochrome P450 family 4 subfamily F member 8	10.2429	4.26894	1.29451	0.0156499	1.26268	19	15615218	15630638							1
ENSG00000143816	WNT9A	Wnt family member 9A	25.561	10.6709	1.24538	0.000618262	1.26026	1	227918656	227947898							1
ENSG00000198744	MTCO3P12	mitochondrially encoded cytochrome c oxidase III pseudogene 12 /// mitochondrially encoded cytochrome c oxidase III pseudogene 12 #or# mitochondrially encoded ATP synthase 6 pseudogene 1	3342.18	1396.19	1.25912	1.18928e-05	1.2593	1	634376	634922	1						0
ENSG00000130595	TNNT3	troponin T3, fast skeletal type	9.99275	4.18693	1.26162	0.0176742	1.25499	11	1919562	1938706							1
ENSG00000112902	SEMA5A	semaphorin 5A	12.9133	5.41236	1.22912	0.0202688	1.25453	5	9035026	9546075							1
ENSG00000225972	MTND1P23	mitochondrially encoded NADH:ubiquinone oxidoreductase core subunit 1 pseudogene 23	3557.95	1492.61	1.25305	2.07582e-05	1.25321	1	629062	629433	1						0
ENSG00000198695	MT-TE	mitochondrially encoded NADH:ubiquinone oxidoreductase core subunit 6 #or# mitochondrially encoded tRNA glutamic acid /// mitochondrially encoded tRNA glutamic acid	2232.59	938.592	1.24976	3.61748e-05	1.25015	0	14149	14673						1	0
ENSG00000210127	MT-TA	mitochondrially encoded tRNA alanine	1725.14	726.536	1.24707	1.88882e-05	1.2476	0	5587	5655						1	0
ENSG00000120907	ADRA1A	adrenoceptor alpha 1A	7.97895	3.36137	1.26062	0.0442927	1.24715	8	26748150	26867273							1
ENSG00000178567	EPM2AIP1	EPM2A interacting protein 1	10.648	4.48923	1.20924	0.0272814	1.24604	3	36985043	36993168							1
ENSG00000116183	PAPPA2	pappalysin 2	16.9355	7.16398	1.18351	0.0071727	1.24122	1	176463171	176845605							1
ENSG00000114204	WDR49	WD repeat domain 49 /// serpin family I member 2 #or# WD repeat domain 49	10.0847	4.26894	1.23624	0.0217758	1.24022	3	167441789	167479004							1
ENSG00000226807	MROH5	maestro heat like repeat family member 5	19.6246	8.30805	1.17786	0.00429256	1.24008	8	141433829	141507230							1
ENSG00000125804	FAM182A	family with sequence similarity 182 member A	12.4604	5.28002	1.26189	0.0133884	1.23874	20	26054655	26086917							1
ENSG00000156968	MPV17L	MPV17 mitochondrial inner membrane protein like	9.53687	4.04205	1.26394	0.0295053	1.23843	16	15395754	15413268							1
ENSG00000282419	TEX13D	TEX13 family member D	10.1416	4.30664	1.25786	0.0260415	1.23565	0	124246249	124336862							1
ENSG00000166535	A2ML1	alpha-2-macroglobulin like 1	14.006	5.97031	1.20235	0.0117872	1.23016	12	8822472	8887001							1
ENSG00000241644	INMT	indolethylamine N-methyltransferase	9.99576	4.26234	1.22715	0.0377005	1.22967	7	30697985	30757602							1
ENSG00000086205	FOLH1	folate hydrolase 1	10.2152	4.3665	1.25727	0.0331657	1.22616	11	49146635	49208670							1
ENSG00000235172	LINC01366	long intergenic non-protein coding RNA 1366	11.561	4.94896	1.23184	0.0182898	1.22407	5	170331429	170333879			1				0
ENSG00000212807	OR2A42	olfactory receptor family 2 subfamily A member 42	9.6827	4.14922	1.22166	0.0296601	1.22257	7	144228244	144239605							1
ENSG00000188611	ASAH2	N-acylsphingosine amidohydrolase 2	10.2627	4.39827	1.17569	0.0307535	1.2224	10	50182778	50248610							1
ENSG00000082074	FYB1	FYN binding protein 1	9.59976	4.11746	1.23401	0.0199105	1.22124	5	39105255	39274528							1
ENSG00000135480	KRT7	keratin 7	11.5229	4.94302	1.2352	0.019243	1.22104	12	52232520	52252186							1
ENSG00000270069	MIR222HG	MIR222 host gene	12.5494	5.38719	1.20541	0.0142386	1.22001	0	45745211	45770274				1			0
ENSG00000178965	ERICH3	glutamate rich 3	19.4159	8.33681	1.17211	0.00502361	1.21967	1	74568111	74673738							1
ENSG00000198888	MT-ND1	mitochondrially encoded NADH:ubiquinone oxidoreductase core subunit 1 #or# mitochondrially encoded tRNA isoleucine /// mitochondrially encoded NADH:ubiquinone oxidoreductase core subunit 1 #or# mitochondrially encoded tRNA leucine 1 (UUA/G) /// mitochondrially encoded NADH:ubiquinone oxidoreductase core subunit 1	30268.9	13002	1.21908	1.88538e-05	1.2191	0	3307	4262						1	0
ENSG00000198727	MT-CYB	mitochondrially encoded cytochrome b /// mitochondrially encoded cytochrome b #or# mitochondrially encoded tRNA threonine	40048.5	17244.3	1.21561	3.63067e-05	1.21563	0	14747	15887						1	0
ENSG00000231107	LINC01508	long intergenic non-protein coding RNA 1508	8.91979	3.84692	1.1683	0.0484887	1.21331	9	90300902	90433505			1				0
ENSG00000249119	MTND6P4	mitochondrially encoded NADH:ubiquinone oxidoreductase core subunit 6 pseudogene 4	580.553	250.451	1.21227	3.22651e-05	1.2129	5	134924123	134924644	1						0
ENSG00000073734	ABCB11	ATP binding cassette subfamily B member 11	8.58064	3.70204	1.20145	0.0454344	1.21277	2	168922938	169031322							1
ENSG00000240021	TEX35	testis expressed 35	7.5602	3.2638	1.26695	0.0436546	1.21187	1	178513077	178548602							1
ENSG00000205176	REXO1L1P	REXO1 like 1, pseudogene #or# REXO1 like 3, pseudogene /// REXO1 like 1, pseudogene	74.5973	32.2921	1.19507	8.3178e-08	1.20794	8	85656442	85663497	1						0
ENSG00000182070	OR52A1	olfactory receptor family 52 subfamily A member 1	8.00671	3.46854	1.19334	0.0469336	1.20688	11	5143219	5154757							1
ENSG00000282840	AC004554.2		9.63822	4.17732	1.28491	0.0199676	1.20619	0	11668401	11757718		1					0
ENSG00000211459	MT-RNR1	mitochondrially encoded 12S RNA	26258.9	11413	1.2021	4.0128e-05	1.20212	0	648	1601						1	0
ENSG00000273621	RF02271	eukaryotic translation elongation factor 1 beta 2 #or# NA /// NA /// poly(rC) binding protein 2 pseudogene 1 #or# NA /// nucleic acid binding protein 1 #or# NA /// activating transcription factor 2 #or# NA /// carnosine N-methyltransferase 1 #or# NA	14.5	6.31993	1.102	0.0193334	1.19807	4	144739762	144739941	1						0
ENSG00000107562	CXCL12	C-X-C motif chemokine ligand 12	17.677	7.71599	1.16053	0.00651086	1.19595	10	44370165	44386493							1
ENSG00000185313	SCN10A	sodium voltage-gated channel alpha subunit 10	11.3831	4.97111	1.21884	0.019175	1.19525	3	38696807	38816217							1
ENSG00000231672	DIRC3	disrupted in renal carcinoma 3	11.4968	5.02503	1.20727	0.0199459	1.19403	2	217284019	217756593							1
ENSG00000226777	FAM30A	family with sequence similarity 30 member A	16.572	7.25193	1.23021	0.00450777	1.19231	14	105917979	105932642							1
ENSG00000222724	RNU2-63P	RNA, U2 small nuclear 63, pseudogene	17.074	7.47288	1.18784	0.00501437	1.19206	2	88016354	88016547	1						0
ENSG00000107295	SH3GL2	SH3 domain containing GRB2 like 2, endophilin A1	9.67635	4.24679	1.13975	0.0488943	1.18809	9	17579082	17797129							1
ENSG00000210077	MT-TV	mitochondrially encoded tRNA valine #or# mitochondrially encoded 16S RNA /// mitochondrially encoded tRNA valine /// mitochondrially encoded tRNA valine #or# mitochondrially encoded 12S RNA	4425.97	1943.4	1.18726	2.92698e-05	1.18741	0	1602	1670						1	0
ENSG00000008118	CAMK1G	calcium/calmodulin dependent protein kinase IG	11.9096	5.22977	1.18365	0.0225478	1.1873	1	209583717	209613938							1
ENSG00000265763	ZNF488	zinc finger protein 488	12.542	5.50992	1.19751	0.0161097	1.18667	10	47365496	47384273							1
ENSG00000132704	FCRL2	Fc receptor like 2	9.09338	3.99774	1.20894	0.0408877	1.18563	1	157745733	157777132							1
ENSG00000124749	COL21A1	collagen type XXI alpha 1 chain	11.3416	4.98732	1.13885	0.0268735	1.18529	6	56056590	56394094							1
ENSG00000210112	MT-TM	mitochondrially encoded tRNA methionine /// mitochondrially encoded NADH:ubiquinone oxidoreductase core subunit 2 #or# mitochondrially encoded tRNA methionine	1706.49	751.16	1.18354	6.30094e-05	1.18384	0	4402	4469						1	0
ENSG00000255823	MTRNR2L8	MT-RNR2 like 8	432.251	190.614	1.17862	1.54154e-06	1.18121	11	10507887	10509189							1
ENSG00000240409	MTATP8P1	mitochondrially encoded ATP synthase 8 pseudogene 1	178.769	78.8552	1.17839	0.00146089	1.18082	1	633535	633741	1						0
ENSG00000255587	RAB44	RAB44, member RAS oncogene family	12.0293	5.32139	1.13431	0.0266927	1.17668	6	36697810	36733183							1
ENSG00000177994	C2orf73	chromosome 2 open reading frame 73	17.9593	7.94882	1.15742	0.00576674	1.17592	2	54330034	54383742							1
ENSG00000008196	TFAP2B	transcription factor AP-2 beta	10.1138	4.47962	1.21796	0.027293	1.17488	6	50818723	50847613							1
ENSG00000137204	SLC22A7	solute carrier family 22 member 7	7.95921	3.5284	1.21342	0.0489907	1.17361	6	43295694	43305538							1
ENSG00000082482	KCNK2	potassium two pore domain channel subfamily K member 2	8.70039	3.86247	1.11196	0.0485743	1.17156	1	215005775	215237093							1
ENSG00000273567	REXO1L3P	REXO1 like 3, pseudogene	12.3454	5.48476	1.16533	0.0284934	1.17047	8	85654684	85658514	1						0
ENSG00000229153	EPHA1-AS1	EPHA1 antisense RNA 1	10.7279	4.77598	1.20068	0.0197496	1.1675	7	143407813	143523449							1
ENSG00000233766	AC098617.1		10.2366	4.5653	1.0627	0.0376118	1.16495	2	191846539	192044525		1					0
ENSG00000272259	LINC01749	long intergenic non-protein coding RNA 1749	8.04517	3.59787	1.16949	0.0442258	1.16098	20	63009383	63085071			1				0
ENSG00000182218	HHIPL1	HHIP like 1	13.8892	6.21936	1.12024	0.0157491	1.15913	14	99645110	99680569							1
ENSG00000168314	MOBP	myelin-associated oligodendrocyte basic protein	10.9272	4.8957	1.15513	0.0213308	1.15834	3	39467198	39529479							1
ENSG00000277128	AL589743.5		11.9601	5.3591	1.09416	0.0394011	1.15816	14	19124807	19175530		1					0
ENSG00000225914	AL662796.1		8.93216	4.00434	1.17686	0.0418928	1.15745	6	32254640	32407763		1					0
ENSG00000142405	NLRP12	NLR family pyrin domain containing 12	9.03652	4.05166	1.11048	0.0467142	1.15726	19	53793603	53824394							1
ENSG00000240405	SAMMSON	survival associated mitochondrial melanoma specific oncogenic non-coding RNA	18.8587	8.45587	1.13302	0.00331638	1.15721	3	69999550	70518064							1
ENSG00000230021	AL669831.3		937.897	421.228	1.15412	7.07433e-06	1.15483	1	586071	827796		1					0
ENSG00000189367	KIAA0408	KIAA0408 #or# NA /// KIAA0408	12.2992	5.52613	1.07018	0.0345274	1.15422	6	127440343	127459391							1
ENSG00000225110	PNMA6F	PNMA family member 6F	10.1613	4.5868	1.12372	0.0378759	1.14753	0	153317681	153321822							1
ENSG00000261446	LINC00559	long intergenic non-protein coding RNA 559	11.8052	5.331	1.07548	0.0310144	1.14694	13	90060247	90119719			1				0
ENSG00000231933	Z98949.1		12.7996	5.78706	1.15671	0.0195918	1.14519	22	25876854	25903247		1					0
ENSG00000237463	AL157714.2		9.59674	4.34435	1.1732	0.0272138	1.1434	1	165476841	165582155		1					0
ENSG00000077279	DCX	doublecortin	9.76097	4.41976	1.16977	0.0396184	1.14306	0	111293779	111412429							1
ENSG00000229425	AJ009632.2		12.3393	5.59193	1.14472	0.0235528	1.14185	21	15370500	15627342		1					0
ENSG00000276540	REXO1L10P	REXO1 like 10, pseudogene	11.7761	5.34289	1.16303	0.023956	1.14017	8	85744543	85748373	1						0
ENSG00000210100	MT-TI	mitochondrially encoded tRNA isoleucine	612.338	278.174	1.13687	6.60792e-05	1.13834	0	4263	4331						1	0
ENSG00000234663	LINC01934	long intergenic non-protein coding RNA 1934	19.0644	8.66061	1.11091	0.00371815	1.13834	2	181086076	181409321			1				0
ENSG00000007174	DNAH9	dynein axonemal heavy chain 9	21.7628	9.89198	1.17397	0.00451742	1.13753	17	11598431	11969748							1
ENSG00000163959	SLC51A	solute carrier family 51 alpha subunit	8.39034	3.81515	1.14084	0.0451845	1.13699	3	196211487	196243178							1
ENSG00000279072	AC118758.3		73.6996	33.5139	1.14704	7.27086e-08	1.1369	7	56809214	56848800		1					0
ENSG00000273542	HIST1H4K	histone cluster 1 H4 family member k	10.1476	4.61555	1.11879	0.0344434	1.13657	6	27831216	27831527							1
ENSG00000172995	ARPP21	cAMP regulated phosphoprotein 21	11.8865	5.40935	1.12488	0.0213242	1.1358	3	35638945	35794496							1
ENSG00000197210	AP000550.1		12.3223	5.60815	1.10688	0.0336097	1.13567	22	21114607	21124451		1					0
ENSG00000283167	AC140479.7		12.4159	5.65179	1.12561	0.0161699	1.13541	2	110321402	110348941		1					0
ENSG00000203734	ECT2L	epithelial cell transforming 2 like	10.1553	4.62516	1.11305	0.0291534	1.13466	6	138795926	138904070							1
ENSG00000130368	MAS1	MAS1 proto-oncogene, G protein-coupled receptor	12.5681	5.7272	1.20908	0.0103469	1.13386	6	159906690	159916530							1
ENSG00000145536	ADAMTS16	ADAM metallopeptidase with thrombospondin type 1 motif 16	9.6643	4.40421	1.22619	0.0231568	1.13378	5	5140330	5320304							1
ENSG00000248522	SBF1P1	SET binding factor 1 pseudogene 1	13.6896	6.25706	1.06022	0.0298428	1.12952	8	55449509	55455139	1						0
ENSG00000102387	TAF7L	TATA-box binding protein associated factor 7 like	11.3584	5.22016	1.10232	0.0373833	1.12159	0	101268253	101293057							1
ENSG00000145936	KCNMB1	potassium calcium-activated channel subfamily M regulatory beta subunit 1	13.2431	6.09304	1.0553	0.0443832	1.12	5	170374671	170389677							1
ENSG00000169247	SH3TC2	SH3 domain and tetratricopeptide repeats 2	20.1818	9.29038	1.08953	0.00403192	1.11925	5	148923639	149063163							1
ENSG00000210049	MT-TF	mitochondrially encoded tRNA phenylalanine #or# mitochondrially encoded 12S RNA /// mitochondrially encoded tRNA phenylalanine	2285.04	1052.31	1.1184	6.38449e-05	1.11866	0	577	647						1	0
ENSG00000187862	TTC24	tetratricopeptide repeat domain 24	11.2252	5.16991	1.15283	0.0194325	1.11853	1	156579727	156586770							1
ENSG00000188779	SKOR1	SKI family transcriptional corepressor 1	12.6815	5.84098	1.09998	0.0286489	1.11844	15	67819704	67834561							1
ENSG00000171368	TPPP	tubulin polymerization promoting protein	13.9906	6.45219	1.12601	0.0110307	1.11659	5	659862	693395							1
ENSG00000164049	FBXW12	F-box and WD repeat domain containing 12 #or# RNA, 7SL, cytoplasmic 321, pseudogene /// F-box and WD repeat domain containing 12	11.1052	5.1226	1.09469	0.0352656	1.11628	3	48372219	48401259	1						0
ENSG00000009765	IYD	iodotyrosine deiodinase	36.516	16.8681	1.0924	0.000120687	1.11423	6	150368892	150405969							1
ENSG00000282935	DUX4L34	double homeobox 4 like 34 (pseudogene)	13.7618	6.36424	1.02836	0.0297922	1.11261	20	29410348	29411600	1						0
ENSG00000096996	IL12RB1	interleukin 12 receptor subunit beta 1	9.98037	4.62516	1.07528	0.0385211	1.10959	19	18058995	18098944							1
ENSG00000013725	CD6	CD6 molecule	15.5238	7.19574	1.06988	0.0116056	1.10926	11	60971680	61020377							1
ENSG00000234576	MTND1P26	mitochondrially encoded NADH:ubiquinone oxidoreductase core subunit 1 pseudogene 26	70.0179	32.5457	1.10389		1.10526	2	131385700	131386237	1						0
ENSG00000160963	COL26A1	collagen type XXVI alpha 1 chain	23.6596	11.0072	1.14376	0.00163595	1.10397	7	101362820	101559024							1
ENSG00000163873	GRIK3	glutamate ionotropic receptor kainate type subunit 3	19.9607	9.29397	1.1029	0.00395702	1.1028	1	36795527	37034129							1
ENSG00000039139	DNAH5	dynein axonemal heavy chain 5	19.5172	9.08923	1.11601	0.00318188	1.10252	5	13690331	13944543							1
ENSG00000169427	KCNK9	potassium two pore domain channel subfamily K member 9	10.7908	5.03464	1.05009	0.0385971	1.09984	8	139600838	139703056							1
ENSG00000185070	FLRT2	fibronectin leucine rich transmembrane protein 2	23.1575	10.8151	1.0954	0.00157976	1.09843	14	85530144	85654426							1
ENSG00000124772	CPNE5	copine 5	18.162	8.49357	1.0952	0.00623031	1.09648	6	36740775	36840002							1
ENSG00000152822	GRM1	glutamate metabotropic receptor 1	11.3677	5.32139	1.0391	0.0465347	1.09507	6	146027646	146437598							1
ENSG00000169302	STK32A	serine/threonine kinase 32A	12.2855	5.75897	1.0469	0.0405523	1.09307	5	147234963	147387852							1
ENSG00000115919	KYNU	kynureninase	16.391	7.69317	1.10001	0.00902894	1.09125	2	142877498	143055832							1
ENSG00000110799	VWF	von Willebrand factor	22.6619	10.6547	1.08015	0.00308977	1.08878	12	5948874	6124770							1
ENSG00000215440	NPEPL1	aminopeptidase like 1 /// aminopeptidase like 1 #or# STX16-NPEPL1 readthrough (NMD candidate)	17.9118	8.43371	1.07499	0.00539107	1.08667	20	58689131	58719238							1
ENSG00000177675	CD163L1	CD163 molecule like 1	14.006	6.60301	1.11308	0.015976	1.08485	12	7346685	7479897							1
ENSG00000137868	STRA6	stimulated by retinoic acid 6	27.9046	13.1564	1.08165	0.000483936	1.08473	15	74179466	74212267							1
ENSG00000133454	MYO18B	myosin XVIIIB	25.073	11.8268	1.08292	0.00535002	1.08407	22	25742144	26031041							1
ENSG00000182752	PAPPA	pappalysin 1	13.0283	6.17505	1.06429	0.0214917	1.07713	9	116153804	116402322							1
ENSG00000167676	PLIN4	perilipin 4	21.9973	10.4314	1.02479	0.00471244	1.07639	19	4502180	4518465							1
ENSG00000125648	SLC25A23	solute carrier family 25 member 23	13.3153	6.33247	1.04204	0.0172766	1.07224	19	6436079	6465203							1
ENSG00000247877	AC021086.1		8.78333	4.17732	1.15383	0.0352109	1.07219	5	100449754	100535262		1					0
ENSG00000203710	CR1	complement C3b/C4b receptor 1 (Knops blood group)	17.3991	8.28223	1.05686	0.0136214	1.07092	1	207496147	207641765							1
ENSG00000260139	CSPG4P13	chondroitin sulfate proteoglycan 4 pseudogene 13	13.8478	6.59707	1.03063	0.0236309	1.06976	15	77894684	77904674	1						0
ENSG00000059378	PARP12	poly(ADP-ribose) polymerase family member 12	14.3682	6.86167	1.08498	0.0189072	1.06625	7	140023744	140063721							1
ENSG00000011083	SLC6A7	solute carrier family 6 member 7	10.3195	4.93341	1.09571	0.030265	1.06472	5	150189957	150222788							1
ENSG00000198216	CACNA1E	calcium voltage-gated channel subunit alpha1 E	32.085	15.339	1.06047	0.000539145	1.06469	1	181317690	181808084							1
ENSG00000136378	ADAMTS7	ADAM metallopeptidase with thrombospondin type 1 motif 7	46.6482	22.3403	1.0363	0.000111137	1.06217	15	78759203	78811431							1
ENSG00000149295	DRD2	dopamine receptor D2	11.3048	5.41896	1.04673	0.0359137	1.06085	11	113409615	113475691							1
ENSG00000086570	FAT2	FAT atypical cadherin 2 /// FAT atypical cadherin 2 #or# microRNA 6499	22.2227	10.6547	1.03677	0.00469189	1.06055	5	151504093	151568944							1
ENSG00000214548	MEG3	maternally expressed 3 (non-protein coding)	39.8416	19.1076	1.02307	0.000834928	1.06013	14	100779410	100861031							1
ENSG00000273338	AC103591.3		13.7912	6.61923	1.10548	0.00912458	1.05902	1	78004346	78004554		1					0
ENSG00000152578	GRIA4	glutamate ionotropic receptor AMPA type subunit 4	9.34657	4.49583	1.05351	0.0420123	1.05585	11	105609994	105982092							1
ENSG00000162814	SPATA17	spermatogenesis associated 17	13.3889	6.44559	1.04031	0.0189412	1.05465	1	217631324	217871696							1
ENSG00000100433	KCNK10	potassium two pore domain channel subfamily K member 10	17.0278	8.20682	1.04504	0.0135623	1.053	14	88180103	88326907							1
ENSG00000254042	AC011365.1		12.5049	6.03611	1.05655	0.0234353	1.0508	5	168706567	168720884		1					0
ENSG00000214128	TMEM213	transmembrane protein 213	10.4807	5.06274	1.06052	0.0399311	1.04975	7	138797952	138838101							1
ENSG00000185518	SV2B	synaptic vesicle glycoprotein 2B	19.8149	9.57412	1.04318	0.00520148	1.04938	15	91099950	91301309							1
ENSG00000283676	MIR5087	microRNA 5087	17.4867	8.47142	1.02811	0.0087582	1.04558	1	148334479	148334554				1			0
ENSG00000115705	TPO	thyroid peroxidase	12.6032	6.11152	1.09471	0.0230532	1.04419	2	1374223	1543711							1
ENSG00000143341	HMCN1	hemicentin 1	45.3455	22.0913	1.0191	2.71335e-05	1.03748	1	185734551	186190949							1
ENSG00000136383	ALPK3	alpha kinase 3	25.5516	12.4536	1.02025	0.00240202	1.03685	15	84816680	84873482							1
ENSG00000165259	HDX	highly divergent homeobox	11.1868	5.46261	1.08692	0.0234545	1.03413	0	84317874	84502479							1
ENSG00000131620	ANO1	anoctamin 1	13.5595	6.62884	1.01189	0.0227017	1.03247	11	70078302	70189528							1
ENSG00000182230	FAM153B	family with sequence similarity 153 member B #or# NA /// family with sequence similarity 153 member B	11.443	5.59853	1.0167	0.0456233	1.03134	5	176060689	176116015							1
ENSG00000279359	AL359195.2		12.8718	6.30071	1.05011	0.022687	1.03063	10	80249710	80254121		1					0
ENSG00000060718	COL11A1	collagen type XI alpha 1 chain	19.9731	9.77886	1.03483	0.00782486	1.03032	1	102876467	103108872							1
ENSG00000054938	CHRDL2	chordin like 2	10.4269	5.10704	1.00567	0.0489762	1.02975	11	74696429	74731385							1
ENSG00000187243	MAGED4B	MAGE family member D4B /// MAGE family member D4B #or# small nucleolar RNA, H/ACA box 11E	11.9249	5.84098	1.04087	0.0297495	1.0297	0	52061827	52069248							1
ENSG00000215483	LINC00598	long intergenic non-protein coding RNA 598	22.2659	10.9259	1.0104	0.00364143	1.02709	13	40079106	40535807			1				0
ENSG00000131475	VPS25	vacuolar protein sorting 25 homolog	14.8548	7.28964	1.1102	0.0114514	1.02701	17	42773436	42779599							1
ENSG00000058335	RASGRF1	Ras protein specific guanine nucleotide releasing factor 1	24.4957	12.0375	1.00276	0.00584405	1.02499	15	78959947	79090773							1
ENSG00000226383	LINC01876	long intergenic non-protein coding RNA 1876	9.81916	4.83584	1.02136	0.0426826	1.02183	2	156011530	156254950			1				0
ENSG00000182162	P2RY8	P2Y receptor family member 8	14.1826	7.00354	1.03184	0.0241046	1.01796	0	1462572	1537107							1
ENSG00000177694	NAALADL2	N-acetylated alpha-linked acidic dipeptidase like 2	29.0892	14.3692	1.02879	0.00108523	1.0175	3	174438573	175810552							1
ENSG00000151789	ZNF385D	zinc finger protein 385D	11.555	5.72126	1.01049	0.0372638	1.01411	3	21412222	22373321							1
ENSG00000155846	PPARGC1B	PPARG coactivator 1 beta	33.0693	16.4077	1.02278	0.000537431	1.01112	5	149730298	149855022							1
ENSG00000120738	EGR1	early growth response 1	19.7122	9.84466	1.02751	0.00411166	1.00168	5	138465490	138469315							1
ENSG00000198670	LPA	lipoprotein(a)	25.3707	12.7433	1.03804	0.00163061	0.993425	6	160531483	160664259							1
ENSG00000280587	LINC01348	long intergenic non-protein coding RNA 1348	24.6128	12.3686	1.03048	0.00195674	0.992728	1	235065479	235074220			1				0
ENSG00000148082	SHC3	SHC adaptor protein 3	13.7742	6.92747	1.00284	0.030822	0.991567	9	89005771	89178767							1
ENSG00000050327	ARHGEF5	Rho guanine nucleotide exchange factor 5	15.7649	8.07749	1.02217	0.0150896	0.964737	7	144355288	144380632							1
ENSG00000112038	OPRM1	opioid receptor mu 1	15.4104	7.91046	1.03372	0.0172271	0.962068	6	154010496	154246867							1
ENSG00000165801	ARHGEF40	Rho guanine nucleotide exchange factor 40	21.4113	11.0079	1.00819	0.004644	0.959836	14	21070270	21090240							1
ENSG00000197421	GGT3P	gamma-glutamyltransferase 3 pseudogene	11.9249	6.13367	1.01225	0.0486554	0.959158	22	18773665	18843399	1						0
ENSG00000185221	GAPDHP24	glyceraldehyde 3 phosphate dehydrogenase pseudogene 24	2.83156	0	4.23914	0.01426	?	1	214870734	214871716	1						0
ENSG00000235736	AL031275.1		2.59376	0	4.14156	0.0229073	?	1	168763365	168774490		1					0
ENSG00000277095	AC242852.2		4.67479	0	4.96454	0.00107071	?	1	143354191	143386122		1					0
ENSG00000253515	AC018682.2		2.68574	0	4.08547	0.00362592	?	2	46499731	46501278		1					0
ENSG00000242540	AC108025.2		3.55132	0	4.59564	0.00401074	?	2	5696220	5708095		1					0
ENSG00000279544	AL133243.4		3.22757	0	4.4678	0.00137392	?	2	32563328	32566436		1					0
ENSG00000116031	CD207	CD207 molecule	2.13488	0	3.92323	0.0147209	?	2	70830214	70835822							1
ENSG00000236502	SIX3-AS1	SIX3 antisense RNA 1	2.23923	0	3.97843	0.00637267	?	2	44940154	44941873							1
ENSG00000241018	RCC2P5	regulator of chromosome condensation 2 pseudogene 5	2.0934	0	3.82358	0.0131534	?	3	96753185	96754671	1						0
ENSG00000240854	AC117409.1		2.28371	0	3.96993	0.0234406	?	3	132175402	132176711		1					0
ENSG00000243486	AC068985.1		2.5369	0	4.07787	0.0256647	?	3	153881526	153940836		1					0
ENSG00000261826	AC121333.1		2.53389	0	4.12427	0.016709	?	3	140865075	140867783		1					0
ENSG00000236530	KPNA2P1	karyopherin subunit alpha 2 pseudogene 1	2.03655	0	3.73407	0.0470002	?	4	80079532	80081122	1						0
ENSG00000250144	AC104619.3		2.22685	0	3.88495	0.0193938	?	4	135045464	135046850		1					0
ENSG00000248863	AC097376.1		2.78407	0	4.28001	0.00472362	?	4	139426299	139430884		1					0
ENSG00000171560	FGA	fibrinogen alpha chain	4.52595	0	4.93121	0.00053024	?	4	154583126	154590766							1
ENSG00000271043	MTRNR2L2	MT-RNR2 like 2	2.03353	0	3.80305	0.0191162	?	5	80650000	80650086							1
ENSG00000248533	AC034226.1	NA /// NA #or# GDNF antisense RNA 1	3.71555	0	4.64262	0.0234518	?	5	37953402	37966964							1
ENSG00000253357	AC008708.1		2.28672	0	3.9194	0.0404919	?	5	167721363	167729124		1					0
ENSG00000220553	RPL5P19	ribosomal protein L5 pseudogene 19	3.23058	0	4.40367	0.00278472	?	6	92013842	92014734	1						0
ENSG00000272540	AL662797.1		2.19776	0	3.8655	0.0239424	?	6	30723105	30723877		1					0
ENSG00000218520	AL450346.2		2.93893	0	4.22574	0.0111117	?	6	63229087	63230110		1					0
ENSG00000234639	AC009263.1		3.92425	0	4.68928	0.0020214	?	7	138022458	138024339		1					0
ENSG00000211714	TRBV7-3	T cell receptor beta variable 7-3	2.17936	0	3.9153	0.041842	?	7	142384329	142384841							1
ENSG00000197320	AC060834.1		2.7426	0	4.19981	0.0050799	?	7	9726241	9728272		1					0
ENSG00000237709	EEF1A1P28	eukaryotic translation elongation factor 1 alpha 1 pseudogene 28	2.0934	0	3.82087	0.0289727	?	7	88639014	88640416	1						0
ENSG00000253397	AC069113.2		2.18237	0	3.86646	0.0287696	?	8	27904481	27910310		1					0
ENSG00000235165	CDK5P1	cyclin dependent kinase 5 pseudogene 1	3.03726	0	4.35122	0.00541905	?	8	122769274	122770150	1						0
ENSG00000230549	USP17L1	ubiquitin specific peptidase 17-like family member 1	2.5369	0	4.07915	0.0298241	?	8	7332387	7333979							1
ENSG00000235707	AL158073.1		2.28672	0	3.92075	0.044376	?	9	75401889	75402992		1					0
ENSG00000250833	DNM1P17	dynamin 1 pseudogene 17	3.3764	0	4.50412	0.0150733	?	10	30353706	30357365	1						0
ENSG00000257067	AP000797.3		2.22384	0	3.95785	0.0153027	?	11	115932774	115942995		1					0
ENSG00000187166	H1FNT	H1 histone family member N, testis specific	2.72721	0	4.20084	0.00980223	?	12	48328980	48330279							1
ENSG00000214215	C12orf74	chromosome 12 open reading frame 74	3.59581	0	4.60967	0.00373014	?	12	92702843	92708549							1
ENSG00000225870	LINC00368	long intergenic non-protein coding RNA 368	3.23359	0	4.41051	0.0305125	?	13	111095838	111103097			1				0
ENSG00000229665	PRR20C	proline rich 20C	3.23058	0	4.40897	0.00380878	?	13	57140918	57157082							1
ENSG00000243274	RN7SL571P	RNA, 7SL, cytoplasmic 571, pseudogene	2.39108	0	3.97034	0.0398719	?	13	76134931	76135225	1						0
ENSG00000258565	BLZF2P	basic leucine zipper nuclear factor 2 pseudogene	2.24224	0	3.89053	0.0285982	?	14	68867857	68869951	1						0
ENSG00000278143	NF1P7	neurofibromin 1 pseudogene 7	2.53389	0	4.13924	0.00689078	?	14	18899942	18909673	1						0
ENSG00000258768	AL356019.2		2.94829	0	4.32035	0.00584517	?	14	20260480	20264308		1					0
ENSG00000259543	AC060809.1		2.68574	0	4.13611	0.0170202	?	15	81427448	81755217		1					0
ENSG00000260159	AC091304.2		2.1225	0	3.8434	0.0197909	?	15	28454660	28457783		1					0
ENSG00000261127	AC133548.2		3.04027	0	4.2987	0.00618567	?	16	32289547	32310555		1					0
ENSG00000279764	AC009102.3		2.07802	0	3.82033	0.0289101	?	16	56306845	56308335		1					0
ENSG00000262322	MTND4P34	mitochondrially encoded NADH:ubiquinone oxidoreductase core subunit 4 pseudogene 34	2.43255	0	4.03353	0.0330905	?	16	10721698	10723068	1						0
ENSG00000272383	AC006270.3		2.83156	0	4.23601	0.00933587	?	17	63088162	63089197		1					0
ENSG00000204913	LRRC3C	leucine rich repeat containing 3C	2.7426	0	4.20321	0.0280165	?	17	39941474	39944747							1
ENSG00000257513	NPIPB1P	nuclear pore complex interacting protein family member B1, pseudogene	2.03655	0	3.71631	0.0271971	?	18	11619509	11639699	1						0
ENSG00000266105	AC009831.2		2.03353	0	3.79826	0.0282457	?	18	31966960	31967545		1					0
ENSG00000269420	PLA2G4C-AS1	PLA2G4C antisense RNA 1	2.73022	0	4.17401	0.0426706	?	19	48061371	48064945							1
ENSG00000225127	LINC00237	long intergenic non-protein coding RNA 237	2.03353	0	3.80761	0.0137613	?	20	21087604	21106358			1				0
ENSG00000183640	KRTAP8-1	keratin associated protein 8-1	2.38807	0	4.01241	0.0242483	?	21	30812697	30813252							1
ENSG00000280372	CR382285.2		2.44794	0	4.0349	0.0232763	?	21	10028361	10029855		1					0
ENSG00000224775	BRAFP1	BRAF pseudogene 1	3.22455	0	4.50681	0.00304777	?	0	75582676	75585506	1						0
ENSG00000269791	SSX4B	SSX family member 4B	3.37339	0	4.54155	0.00385939	?	0	48402078	48411910							1
ENSG00000238210	ETDA	embryonic testis differentiation homolog A	2.64126	0	4.11964	0.0212301	?	0	135252061	135253583							1
ENSG00000173457	PPP1R14B	protein phosphatase 1 regulatory inhibitor subunit 14B	5.03233	9.61843	-1.04697	0.0464906	-0.934574	11	64244480	64246941							1
ENSG00000115828	QPCT	glutaminyl-peptide cyclotransferase	5.75209	11.0804	-1.02922	0.0372438	-0.945846	2	37344574	37373322							1
ENSG00000267309	AC092295.2		10.0433	19.6086	-1.00546	0.0089049	-0.965262	19	36489649	36491040		1					0
ENSG00000159247	TUBBP5	tubulin beta pseudogene 5	6.41366	12.6147	-1.01066	0.0334475	-0.975885	9	138150075	138177433	1						0
ENSG00000184619	KRBA2	KRAB-A domain containing 2	10.252	20.5066	-1.05582	0.00725863	-1.00019	17	8368637	8376711							1
ENSG00000143222	UFC1	ubiquitin-fold modifier conjugating enzyme 1	7.20868	14.4417	-1.00507	0.0189446	-1.00244	1	161152776	161158856							1
ENSG00000231050	AL109917.1		6.25546	12.6014	-1.07424	0.0296904	-1.0104	1	1891471	1892658		1					0
ENSG00000187792	ZNF70	zinc finger protein 70	14.2254	28.8301	-1.00766	0.0043556	-1.01911	22	23738678	23751092							1
ENSG00000230648	AL138831.1		6.22335	12.7189	-1.07756	0.0280747	-1.03121	6	4018843	4021215		1					0
ENSG00000177752	YIPF7	Yip1 domain family member 7	5.95478	12.1735	-1.01621	0.0346581	-1.03162	4	44622065	44678556							1
ENSG00000185130	HIST1H2BL	histone cluster 1 H2B family member l	7.64917	15.7121	-1.03056	0.0214359	-1.0385	6	27807444	27807931							1
ENSG00000261409	AL035425.3		17.0599	35.0998	-1.06512	0.00080857	-1.04085	0	108719949	108724944		1					0
ENSG00000132591	ERAL1	Era like 12S mitochondrial rRNA chaperone 1	7.10734	14.7943	-1.07128	0.0137057	-1.05766	17	28854938	28861067							1
ENSG00000162576	MXRA8	matrix remodeling associated 8	14.0765	29.3084	-1.03545	0.000878168	-1.05802	1	1352689	1361777							1
ENSG00000221944	TIGD1	tigger transposable element derived 1 /// tigger transposable element derived 1 #or# microRNA 5001	7.91473	16.5327	-1.01982	0.0182052	-1.06271	2	232547968	232550592							1
ENSG00000181029	TRAPPC5	trafficking protein particle complex 5	8.40271	17.5887	-1.043	0.00999609	-1.06573	19	7680843	7687703							1
ENSG00000178919	FOXE1	forkhead box E1	6.60096	14.0167	-1.03177	0.0228503	-1.0864	9	97853254	97856715							1
ENSG00000279198	AC008894.3		9.42316	20.027	-1.10118	0.00547772	-1.08766	19	16074293	16077395		1					0
ENSG00000171889	MIR31HG	MIR31 host gene	5.15976	10.9738	-1.11717	0.0365317	-1.08869	9	21455642	21559669				1			0
ENSG00000143418	CERS2	ceramide synthase 2	11.1299	23.6735	-1.08849	0.00240688	-1.08883	1	150960583	150975004							1
ENSG00000232519	AL353807.2		7.54782	16.1484	-1.08741	0.0140942	-1.09726	1	155609776	155610380		1					0
ENSG00000265991	MIR4519	microRNA 4519	4.47211	9.61183	-1.23182	0.036543	-1.10386	16	30875266	30875323				1			0
ENSG00000011590	ZBTB32	zinc finger and BTB domain containing 32	13.3982	28.9847	-1.11525	0.000496625	-1.11325	19	35704527	35717038							1
ENSG00000132881	CPLANE2	ciliogenesis and planar polarity effector 2	7.65218	16.625	-1.13886	0.00479917	-1.11941	1	16231700	16237162							1
ENSG00000228395	AL356481.1		3.98111	8.70425	-1.12496	0.0475556	-1.12855	9	128528901	128552410		1					0
ENSG00000273619	AL121832.2		9.88204	21.7277	-1.1663	0.00238893	-1.13665	20	62386303	62386970		1					0
ENSG00000142065	ZFP14	ZFP14 zinc finger protein	5.14738	11.3317	-1.17185	0.0226301	-1.13845	19	36334453	36379199							1
ENSG00000185669	SNAI3	snail family transcriptional repressor 3	5.57115	12.4033	-1.09506	0.0295355	-1.15467	16	88677682	88686493							1
ENSG00000257042	AC008011.2		5.42834	12.1195	-1.20523	0.0256622	-1.15875	12	27958517	27969813		1					0
ENSG00000255435	AP001267.3		3.87375	8.78032	-1.06677	0.038902	-1.18054	11	118511911	118531094		1					0
ENSG00000142541	RPL13A	ribosomal protein L13a #or# NA /// ribosomal protein L13a #or# small nucleolar RNA, C/D box 35A /// ribosomal protein L13a #or# small nucleolar RNA, C/D box 33 /// ribosomal protein L13a #or# small nucleolar RNA, C/D box 34 /// ribosomal protein L13a	53.6759	123.516	-1.19189	2.0679e-11	-1.20236	19	49487554	49492308							1
ENSG00000185900	POMK	protein-O-mannose kinase	8.685	20.0359	-1.20841	0.00245796	-1.20599	8	43093506	43123434							1
ENSG00000135744	AGT	angiotensinogen /// angiotensinogen #or# NA	4.61191	10.6666	-1.12261	0.043714	-1.20966	1	230702523	230714297							1
ENSG00000257150	PGAM1P5	phosphoglycerate mutase 1 pseudogene 5	3.8199	9.02277	-1.29625	0.0280249	-1.24004	12	95551582	95673999	1						0
ENSG00000179284	DAND5	DAN domain BMP antagonist family member 5	3.77241	9.13288	-1.1979	0.0405763	-1.27558	19	12965159	12974762							1
ENSG00000235421	AC114501.2		4.23129	10.3081	-1.28974	0.0255748	-1.2846	7	65525629	65554744		1					0
ENSG00000151006	PRSS53	serine protease 53	3.82926	9.36278	-1.17617	0.0390818	-1.28987	16	31083425	31089628							1
ENSG00000250344	AC105254.1		4.96644	12.2607	-1.23081	0.0159971	-1.30376	4	121071429	121080476		1					0
ENSG00000262413	AC145207.2		8.95056	22.16	-1.31753	0.00105588	-1.30791	17	81867721	81868552		1					0
ENSG00000262001	DLGAP1-AS2	DLGAP1 antisense RNA 2	6.35379	15.7462	-1.30432	0.00452992	-1.30931	18	3603000	3608336							1
ENSG00000109762	SNX25	sorting nexin 25	3.91823	9.82911	-1.21234	0.0252556	-1.32686	4	185204237	185370185							1
ENSG00000100288	CHKB	choline kinase beta	6.81268	17.2044	-1.35353	0.002526	-1.33649	22	50578949	50601455							1
ENSG00000234928	LINC01659	long intergenic non-protein coding RNA 1659	6.16047	15.8179	-1.29702	0.00543771	-1.36045	22	23433564	23435071			1				0
ENSG00000226380	AC016831.1		2.32819	6.20314	-1.35205	0.049361	-1.41379	7	130876809	130913310		1					0
ENSG00000272729	AC009336.1		2.43255	6.4899	-1.40569	0.043272	-1.41573	2	176164164	176165716		1					0
ENSG00000275263	AC135048.3		3.68344	9.84532	-1.34392	0.0187077	-1.41838	16	30956872	30957199		1					0
ENSG00000265055	AC145343.1		3.06334	8.47802	-1.38571	0.0494525	-1.46862	17	68096046	68101474		1					0
ENSG00000268818	AL049747.1		2.28371	6.61923	-1.46847	0.0352901	-1.53528	22	35626988	35635134		1					0
ENSG00000251003	ZFPM2-AS1	ZFPM2 antisense RNA 1	2.23923	6.61328	-1.50784	0.0484897	-1.56236	8	105780246	106060524							1
ENSG00000273189	AC010619.2		133.403	399.122	-1.5781	7.38763e-27	-1.58104	19	49474586	49487637		1					0
ENSG00000269968	AC006064.4		1.74188	5.45666	-1.81678	0.0389094	-1.64737	12	6537794	6538370		1					0
ENSG00000243667	WDR92	WD repeat domain 92	3.28442	10.693	-1.60099	0.00554279	-1.70296	2	68122936	68157560							1
ENSG00000264769	AC145207.8		1.53318	5.10704	-1.73752	0.0387339	-1.73596	17	81922899	81924511		1					0
ENSG00000205500	AC013472.1		1.44421	4.90531	-1.73323	0.0477355	-1.76406	2	26984776	27014612		1					0
ENSG00000255326	AP001922.5		2.19776	7.70938	-1.88303	0.00808415	-1.81058	11	75583196	75594665		1					0
ENSG00000179580	RNF151	ring finger protein 151	1.33986	5.75897	-1.97108	0.02287	-2.10373	16	1966823	1968975							1
ENSG00000120664	SPART-AS1	SPART antisense RNA 1	0.988338	4.40421	-2.2262	0.0438321	-2.15581	13	36346431	36369601							1
ENSG00000198816	ZNF358	zinc finger protein 358	0.943854	5.29557	-2.50694	0.0188536	-2.48815	19	7515292	7521026							1
ENSG00000260001	TGFBR3L	transforming growth factor beta receptor 3 like	0.839501	4.72273	-2.39642	0.0144536	-2.49202	19	7916145	7919097							1
ENSG00000241627	UBQLN4P1	ubiquilin 4 pseudogene 1	0.649193	3.83731	-2.62963	0.0318655	-2.56337	3	148985868	148987668	1						0
ENSG00000264148	AC138207.3		0.649193	3.85286	-2.6352	0.0460207	-2.56921	17	31008154	31008319		1					0
ENSG00000258673	LINC01397	long intergenic non-protein coding RNA 1397	0.399015	2.6903	-3.01614	0.0428616	-2.75325	1	110082688	110109719			1				0
ENSG00000261532	AC009065.7		0.795018	5.45666	-2.62989	0.0126187	-2.77896	16	2211997	2212863		1					0
ENSG00000263627	PPP4R1-AS1	PPP4R1 antisense RNA 1	0.294661	2.7346	-3.02487	0.0392458	-3.2142	18	9615264	9619363							1
ENSG00000230695	AC012462.3		0.294661	2.86987	-3.06412	0.0340995	-3.28386	2	215436253	215436992		1					0
ENSG00000223738	AC016930.1		0.294661	3.73974	-3.49113	0.0176289	-3.66581	3	74101349	74103553		1					0
ENSG00000229010	AL161672.1		0	2.75016	-3.99275	0.00546919	?	1	23140325	23141142		1					0
ENSG00000262211	AC008914.1		0	3.30151	-4.25925	0.00344047	?	5	55936143	55941727		1					0
ENSG00000249456	AL731577.2		0	2.7346	-3.9892	0.00883306	?	10	124917143	124942881		1					0
ENSG00000166787	SAA3P	serum amyloid A3, pseudogene	0	2.1611	-3.6598	0.0259468	?	11	18112472	18116132	1						0
ENSG00000087245	AC007336.3	NA /// matrix metallopeptidase 2 #or# NA	0	2.21502	-3.7372	0.0231074	?	16	55389700	55506691							1
ENSG00000279967	FP671120.2		0	3.20394	-4.23249	0.00320559	?	21	8101251	8103706		1					0
