# Supplementary material for: The role of reciprocal fusions in MLL-r acute leukemia: studying the chromosomal translocation t(6;11)
Source: Oncogene. 2021 Aug 5;40(40):5902–12. doi: 10.1038/s41388-021-01983-3 (PMC8497272; doi:10.1038/s41388-021-01983-3)
Supplement: Supplementary file 9 — ATAC-Seq AF6-MLL [file 41388_2021_1983_MOESM9_ESM.xlsx]

## Sheet: Sheet1
ID	gene symbol	gene	mean exp	mean mock	log2	pvalue	var-log2	chrom	begin	end	PG	NA	LINC	MIR	SNO	MT	PCG
ENSG00000118058	KMT2A	lysine methyltransferase 2A	1171.7	32.2381	5.19913	1.47796e-157	5.18369	11	118436490	118526832							1
ENSG00000215325	ASS1P10	argininosuccinate synthetase 1 pseudogene 10	3.4775	0.226893	3.54472	0.0335145	3.93796	5	145228811	145230054	1						0
ENSG00000281664	LINC00538	long intergenic non-protein coding RNA 538	3.36992	0.226893	3.55413	0.019663	3.89263	1	213924749	213926654			1				0
ENSG00000237990	CNTN4-AS1	CNTN4 antisense RNA 1	3.90105	0.264599	3.7402	0.019745	3.88198	3	3039033	3069242							1
ENSG00000259977	AL121578.3		3.86069	0.264599	3.72027	0.00643868	3.86698	0	37906147	37949405		1					0
ENSG00000235522	AC010978.1		3.0406	0.226893	3.40458	0.0213689	3.74427	2	105846534	105857177		1					0
ENSG00000217648	AL136116.3		3.491	0.264599	3.58388	0.0194838	3.72176	6	143342246	143343383		1					0
ENSG00000253111	AC091114.1		2.93527	0.226893	3.29637	0.0247076	3.69341	8	125466939	125541373		1					0
ENSG00000234056	LINC00463	long intergenic non-protein coding RNA 463	3.30496	0.264599	3.48948	0.0371394	3.64275	13	25172828	25180079			1				0
ENSG00000236591	AL357992.1		3.13242	0.264599	3.4315	0.0288369	3.5654	6	149027700	149032573		1					0
ENSG00000112232	KHDRBS2	KH RNA binding domain containing, signal transduction associated 2	2.67091	0.226893	3.22459	0.0326648	3.55725	6	61679960	62286227							1
ENSG00000277883	NLRP3P1	NLR family pyrin domain containing 3 pseudogene 1	3.06745	0.264599	3.34388	0.0286595	3.53516	0	107974078	107985008	1						0
ENSG00000226025	AC005515.1		2.57669	0.226893	3.11397	0.0430344	3.50543	19	39679374	39686373		1					0
ENSG00000203663	OR2L2	olfactory receptor family 2 subfamily L member 2	2.98914	0.264599	3.39056	0.0195009	3.49785	1	248030070	248042305							1
ENSG00000226818	SLC6A6P1	solute carrier family 6 member 6 pseudogene 1	2.98673	0.264599	3.31207	0.0236259	3.49669	21	19244543	19246392	1						0
ENSG00000198471	RTP2	receptor transporter protein 2	2.97563	0.264599	3.32469	0.0407326	3.49132	3	187698259	187702557							1
ENSG00000104499	GML	glycosylphosphatidylinositol anchored molecule like	2.52523	0.226893	3.0944	0.0450199	3.47633	8	142834247	142916506							1
ENSG00000254229	FAM90A12P	family with sequence similarity 90 member A12, pseudogene	2.93527	0.264599	3.28158	0.0178543	3.47161	8	8027077	8032305	1						0
ENSG00000215417	MIR17	miR-17-92a-1 cluster host gene #or# microRNA 17	2.93527	0.264599	3.29831	0.0260428	3.47161	13	91347820	91354579				1			0
ENSG00000283361	CFAP97D2	CFAP97 domain containing 2	2.93527	0.264599	3.28495	0.0190357	3.47161	13	114154691	114223084							1
ENSG00000259182	AC019254.1		3.52896	0.324458	3.54752	0.0219055	3.44314	15	101168530	101170821		1					0
ENSG00000220548	VIM2P	vimentin 2, pseudogene	2.84345	0.264599	3.27419	0.0314919	3.42576	6	126602356	126603649	1						0
ENSG00000228592	AP000459.2		2.84345	0.264599	3.2792	0.044088	3.42576	21	23361104	23384861		1					0
ENSG00000270823	AC007938.2		2.80309	0.264599	3.2643	0.0350373	3.40514	7	130495794	130498427		1					0
ENSG00000214866	DCDC2C	doublecortin domain containing 2C	2.67091	0.264599	3.2271	0.0272676	3.33545	2	3703592	3847411							1
ENSG00000187823	RTL4	retrotransposon Gag like 4	2.22051	0.226893	2.99872	0.0494034	3.29081	0	112454500	112457112							1
ENSG00000204990	AC005692.1		2.53633	0.264599	3.10313	0.0451114	3.26086	7	141414383	141416390		1					0
ENSG00000278530	CHMP1B2P	charged multivesicular body protein 1B2, pseudogene	4.64282	0.491492	3.1596	0.00810185	3.23976	0	80228489	80335364	1						0
ENSG00000230635	CYP4F60P	cytochrome P450 family 4 subfamily F member 60, pseudogene	4.54859	0.491492	3.09998	0.016081	3.21018	9	42950566	42951630	1						0
ENSG00000188694	KRTAP24-1	keratin associated protein 24-1	2.44451	0.264599	3.07037	0.0437659	3.20767	21	30281309	30282958							1
ENSG00000230324	LINC01734	long intergenic non-protein coding RNA 1734	2.93527	0.324458	3.30622	0.0333088	3.17739	20	39213777	39224748			1				0
ENSG00000237070	AC005550.2		2.30123	0.264599	3.02035	0.048392	3.12053	7	15667947	15681980		1					0
ENSG00000249699	LINC02261	long intergenic non-protein coding RNA 2261	2.80309	0.324458	3.26204	0.0279416	3.11092	4	27217479	27282225			1				0
ENSG00000163530	DPPA2	developmental pluripotency associated 2	2.15554	0.264599	2.8479	0.0420995	3.02617	3	109293788	109316517							1
ENSG00000241135	LINC00881	long intergenic non-protein coding RNA 881	2.56559	0.324458	3.09337	0.0324695	2.98319	3	157089881	157101135			1				0
ENSG00000279076	AL136140.2		3.82033	0.491492	2.86692	0.0466847	2.95846	6	44551577	44553281		1					0
ENSG00000253734	LINC01289	long intergenic non-protein coding RNA 1289	3.72851	0.491492	2.83164	0.026157	2.92336	8	63769430	63785501			1				0
ENSG00000268912	AC012313.5		3.715	0.491492	2.78167	0.0417277	2.91812	19	58428632	58431148		1					0
ENSG00000197428	OR51D1	olfactory receptor family 51 subfamily D member 1	5.61729	0.793797	2.79498	0.00564478	2.82303	11	4637477	4643060							1
ENSG00000219240	AL353692.2		4.96974	0.718386	2.64817	0.0174124	2.79034	6	89886156	89887848		1					0
ENSG00000122481	TMEM56-RWDD3	RWD domain containing 3 #or# TMEM56-RWDD3 readthrough /// TMEM56-RWDD3 readthrough	3.58282	0.529198	2.72118	0.0418947	2.75922	1	95234155	95247225							1
ENSG00000275297	AL162731.1		4.82405	0.718386	2.59333	0.0273753	2.74742	9	41760088	41764175		1					0
ENSG00000280321	AC129502.1		4.5597	0.68068	2.56063	0.0299939	2.74389	11	36196248	36197901		1					0
ENSG00000279672	AP006621.5		3.5021	0.529198	2.69998	0.0285443	2.72634	11	779617	780755		1					0
ENSG00000224177	LINC00570	long intergenic non-protein coding RNA 570	2.90842	0.453786	2.53081	0.0488602	2.68015	2	11393981	11403077			1				0
ENSG00000169903	TM4SF4	transmembrane 4 L six family member 4	3.41269	0.551351	2.74515	0.0321169	2.62986	3	149473974	149503281							1
ENSG00000185156	MFSD6L	major facilitator superfamily domain containing 6 like	4.50824	0.756091	2.50126	0.0217608	2.57593	17	8797162	8799349							1
ENSG00000260850	AC007344.1		4.24388	0.718386	2.47218	0.0235098	2.56255	16	51354456	51525157		1					0
ENSG00000227621	PHBP11	prohibitin pseudogene 11	3.78237	0.648916	2.80036	0.0386761	2.54319	1	223856579	223857387	1						0
ENSG00000234805	AC090505.1		4.91828	0.875809	2.58187	0.0180614	2.48947	3	194755589	194757422		1					0
ENSG00000170356	OR2A20P	olfactory receptor family 2 subfamily A member 20 pseudogene /// olfactory receptor family 2 subfamily A member 20 pseudogene #or# NA	7.12528	1.26974	2.40827	0.00489692	2.48842	7	144250045	144256244	1						0
ENSG00000137757	CASP5	caspase 5	4.17891	0.756091	2.38841	0.0316028	2.46649	11	104994235	105023168							1
ENSG00000005981	ASB4	ankyrin repeat and SOCS box containing 4	4.50824	0.81595	2.48386	0.0173974	2.46601	7	95478444	95540232							1
ENSG00000231023	LINC00326	long intergenic non-protein coding RNA 326	3.90105	0.718386	2.28847	0.038569	2.44103	6	133088080	133106578			1				0
ENSG00000255428	AP002008.3		4.00637	0.756091	2.35828	0.027494	2.40566	11	111414242	111418186		1					0
ENSG00000235711	ANKRD34C	ankyrin repeat domain 34C	3.9414	0.756091	2.27848	0.0372076	2.38208	15	79293285	79298235							1
ENSG00000277704	AL445675.2		3.54246	0.718386	2.14262	0.046512	2.30192	1	242890247	242890803		1					0
ENSG00000250745	USP17L20	ubiquitin specific peptidase 17-like family member 20	4.96974	1.02069	2.20427	0.0200732	2.28363	4	9258124	9260075							1
ENSG00000248118	LINC01019	long intergenic non-protein coding RNA 1019	4.92938	1.02069	2.20045	0.0210685	2.27186	5	3417152	3536094			1				0
ENSG00000234787	LINC00458	long intergenic non-protein coding RNA 458	3.77997	0.793797	2.24023	0.042565	2.25153	13	54115783	54132866			1				0
ENSG00000260460	AL365181.1		5.84369	1.24758	2.1472	0.0123968	2.22774	1	156509854	156511681		1					0
ENSG00000165509	MAGEC3	MAGE family member C3	4.90477	1.0584	2.13066	0.028777	2.21231	0	141838316	141897832							1
ENSG00000226516	FAM138B	family with sequence similarity 138 member B	4.70538	1.02069	2.16943	0.0229656	2.20477	2	113577382	113578852							1
ENSG00000239920	AC104389.4		4.54859	1.02069	2.08423	0.0274451	2.15588	11	5254392	5678434		1					0
ENSG00000271862	AC104118.1		4.60006	1.04284	2.09912	0.0388933	2.14113	5	83049376	83050964		1					0
ENSG00000077092	AC092422.1	NA /// retinoic acid receptor beta #or# NA	4.54859	1.04284	2.08664	0.0352588	2.1249	3	25174332	25597932							1
ENSG00000279501	CR392039.3		4.69428	1.08055	2.15381	0.0223511	2.11914	21	8996496	9018670		1					0
ENSG00000280061	AC011504.1		5.43365	1.26974	2.05093	0.0178289	2.09739	19	30553956	30558058		1					0
ENSG00000275592	VN1R7P	vomeronasal 1 receptor 7 pseudogene	5.56583	1.30744	2.0594	0.0214455	2.08985	21	10357400	10358620	1						0
ENSG00000285051	AC026316.4		9.62366	2.28082	2.15753	0.00128761	2.07704	3	170448639	170860993		1					0
ENSG00000231527	CR769775.1		4.64041	1.1027	2.08609	0.0331897	2.07321	9	61972240	61976380		1					0
ENSG00000218586	AC006971.1		5.88165	1.40501	2.07863	0.0200496	2.06564	7	54933699	54938184		1					0
ENSG00000204581	ACOXL-AS1	ACOXL antisense RNA 1	8.43389	2.02583	2.01453	0.00515186	2.05769	2	111098345	111115588							1
ENSG00000250378	AC114296.1		6.68839	1.60975	2.08053	0.0104577	2.05482	5	135812667	135827546		1					0
ENSG00000175728	C11orf44	chromosome 11 open reading frame 44	5.42255	1.30744	2.03876	0.0353703	2.05222	11	130672956	130717352							1
ENSG00000274553	AC138035.3		3.267	0.793797	2.07816	0.0460446	2.04113	5	181329049	181331839		1					0
ENSG00000187268	FAM9C	family with sequence similarity 9 member C	5.4605	1.34515	1.98466	0.0234881	2.02127	0	13035618	13044682							1
ENSG00000176182	MYPOP	Myb related transcription factor, partner of profilin	8.93575	2.2054	2.06047	0.00297355	2.01855	19	45890020	45902604							1
ENSG00000183837	PNMA3	PNMA family member 3	5.30147	1.323	2.02395	0.015002	2.00258	0	153056409	153060467							1
ENSG00000271820	AL109910.2		6.45313	1.62596	1.78456	0.0333547	1.98871	6	170266669	170276762		1					0
ENSG00000154227	CERS3	ceramide synthase 3	4.92938	1.24758	1.8843	0.0320509	1.98227	15	100400395	100544995							1
ENSG00000224057	EGFR-AS1	EGFR antisense RNA 1	5.26336	1.34515	1.91887	0.0451459	1.96822	7	55179750	55188934							1
ENSG00000215146	BX322639.1		6.14841	1.58825	1.76249	0.0407572	1.95277	10	42331866	42367974		1					0
ENSG00000239039	SNORD13	small nucleolar RNA, C/D box 13	8.10456	2.10124	1.94434	0.00317499	1.94749	8	33513475	33513578					1		0
ENSG00000162039	MEIOB	meiosis specific with OB domains #or# long intergenic non-protein coding RNA 254 /// meiosis specific with OB domains	4.23278	1.1027	2.02003	0.0410945	1.94056	16	1833987	1884294							1
ENSG00000236397	DDX11L2	DEAD/H-box helicase 11 like 2	4.73223	1.23797	2.06613	0.0254017	1.93454	2	113599036	113601261							1
ENSG00000182557	SPNS3	sphingolipid transporter 3 (putative)	8.55256	2.25272	1.82814	0.00765974	1.92469	17	4433688	4488208							1
ENSG00000259425	AC011767.1		4.87792	1.30744	1.87046	0.0488063	1.89952	15	22770523	22776199		1					0
ENSG00000260008	AP001527.1		5.4716	1.47448	1.75046	0.0346296	1.89176	11	102107886	102109842		1					0
ENSG00000278972	AC015920.1		6.72875	1.82109	1.87716	0.00997453	1.88554	17	69433084	69435533		1					0
ENSG00000226358	KRT8P38	keratin 8 pseudogene 38	6.982	1.89056	1.74383	0.0216224	1.88483	10	88727485	88728914	1						0
ENSG00000175197	AC022506.1	DNA damage inducible transcript 3 #or# NA	5.98938	1.6319	1.92964	0.0126494	1.87585	12	57516588	57521737							1
ENSG00000153165	RGPD3	RANBP2-like and GRIP domain containing 3	5.2341	1.43677	1.66923	0.0434736	1.86511	2	106391290	106468376							1
ENSG00000204482	LST1	leukocyte specific transcript 1	4.09819	1.14041	1.92919	0.0478769	1.84544	6	31586124	31588909							1
ENSG00000093134	VNN3	vanin 3	6.79355	1.92826	1.6387	0.0300038	1.81686	6	132722787	132734765							1
ENSG00000233355	CHRM3-AS2	CHRM3 antisense RNA 2	6.0812	1.72947	1.91981	0.0151495	1.81403	1	239703381	239730465							1
ENSG00000223704	LINC01422	long intergenic non-protein coding RNA 1422	7.16564	2.04798	1.72964	0.0167181	1.80689	22	26858634	26865786			1				0
ENSG00000167612	ANKRD33	ankyrin repeat domain 33	7.61605	2.18325	1.78843	0.0140119	1.80256	12	51887960	51891664							1
ENSG00000165568	AKR1E2	aldo-keto reductase family 1 member E2	4.52174	1.30744	1.81758	0.0447582	1.79013	10	4786629	4848062							1
ENSG00000238755	LINC02006	long intergenic non-protein coding RNA 2006	6.17302	1.79893	1.73893	0.0224208	1.77883	3	153384934	153980186			1				0
ENSG00000251170	AC004052.1		5.2476	1.57204	1.70239	0.0340738	1.73902	4	104230380	104411035		1					0
ENSG00000227674	LINC00355	long intergenic non-protein coding RNA 355	9.51833	2.86987	1.79409	0.00384793	1.72972	13	63986371	64076011			1				0
ENSG00000256029	AL590560.1		8.23915	2.48556	1.79187	0.011459	1.72893	1	159834474	159873053		1					0
ENSG00000279678	AC090386.2		6.43978	1.95636	1.78303	0.0185607	1.71884	18	37305295	37306333		1					0
ENSG00000183273	CCDC60	coiled-coil domain containing 60	6.01623	1.83664	1.67421	0.0462057	1.71179	12	119334712	119541047							1
ENSG00000120708	TGFBI	transforming growth factor beta induced	9.16216	2.81963	1.66474	0.00686047	1.70018	5	136028895	136063818							1
ENSG00000279712	FP325330.3		7.25746	2.24311	1.70855	0.01628	1.69396	22	47916728	47926264		1					0
ENSG00000227159	DDX11L16	DEAD/H-box helicase 11 like 16	6.47774	2.02583	1.5813	0.0311905	1.67698	0	156025664	156027877							1
ENSG00000279476	AC092139.3		6.17302	1.93421	1.71605	0.0237159	1.67423	16	81517824	81520617		1					0
ENSG00000119913	TECTB	tectorin beta /// tectorin beta #or# microRNA 6715a	5.2365	1.64745	1.68295	0.0494995	1.66837	10	112283400	112305035							1
ENSG00000163072	NOSTRIN	nitric oxide synthase trafficking	10.4191	3.28001	1.57507	0.00768804	1.66746	2	168786539	168865514							1
ENSG00000235955	CICP20	capicua transcriptional repressor pseudogene 20	4.83997	1.53434	1.66552	0.0390535	1.65738	7	45816216	45819016	1						0
ENSG00000176302	FOXR1	forkhead box R1	7.76173	2.47	1.66376	0.0132037	1.65187	11	118971707	118981291							1
ENSG00000237480	AL355306.2		8.83043	2.81963	1.57654	0.00994275	1.64698	1	105956694	106124564		1					0
ENSG00000180964	TCEAL8	transcription elongation factor A like 8	11.107	3.58826	1.6346	0.00416234	1.63012	0	103252995	103255203							1
ENSG00000144681	STAC	SH3 and cysteine rich domain	8.89539	2.87948	1.61123	0.0101377	1.62725	3	36380344	36548007							1
ENSG00000278862	AC092724.1		6.13266	1.98812	1.55809	0.0389747	1.62511	16	77657174	77660570		1					0
ENSG00000273744	RF00015	NA /// prothymosin alpha #or# NA	6.02733	1.97191	1.64387	0.0458872	1.61193	6	106271634	106271720							1
ENSG00000225963	AC009950.1		5.10432	1.69176	1.66514	0.0432607	1.5932	2	230121370	230174223		1					0
ENSG00000261534	AL596244.1		6.79596	2.25272	1.48733	0.0325759	1.59301	9	121815674	121819452		1					0
ENSG00000284748	AL513220.1		6.34796	2.11745	1.46919	0.0406799	1.58396	1	37596126	37607336		1					0
ENSG00000184719	RNLS	renalase, FAD dependent amine oxidase	8.77656	2.93934	1.53046	0.0146359	1.57816	10	88273864	88584530							1
ENSG00000127954	STEAP4	STEAP4 metalloreductase	12.6911	4.26234	1.55461	0.00550789	1.5741	7	88270892	88306891							1
ENSG00000164761	TNFRSF11B	TNF receptor superfamily member 11b	6.11046	2.06353	1.53598	0.0321109	1.56616	8	118923557	118952200							1
ENSG00000165511	C10orf25	chromosome 10 open reading frame 25	6.11046	2.12339	1.52723	0.0475506	1.52491	10	44997698	45000888							1
ENSG00000153294	ADGRF2	adhesion G protein-coupled receptor F2 /// adhesion G protein-coupled receptor F4 #or# adhesion G protein-coupled receptor F2	6.42627	2.23651	1.53963	0.0302916	1.52273	6	47685864	47722021							1
ENSG00000201183	RNVU1-3	RNA, variant U1 small nuclear 3	11.598	4.05166	1.49027	0.00985275	1.51729	1	148402715	148402875							1
ENSG00000091010	POU4F3	POU class 4 homeobox 3 /// POU class 4 homeobox 3 #or# NA	7.13639	2.49517	1.40718	0.0329789	1.51606	5	146338839	146341722							1
ENSG00000273338	AC103591.3		18.8934	6.61923	1.49063	0.000348709	1.51315	1	78004346	78004554		1					0
ENSG00000262484	CCER2	coiled-coil glutamate rich protein 2	8.90004	3.12853	1.4659	0.0325577	1.50833	19	38908980	38912158							1
ENSG00000185296	AC026785.1		8.23674	2.90164	1.49472	0.0148737	1.50521	5	17306381	17306960		1					0
ENSG00000221970	OR2A1	olfactory receptor family 2 subfamily A member 1	8.55256	3.01475	1.50445	0.0187789	1.50432	7	144312464	144322668							1
ENSG00000228933	AC107419.1		5.88405	2.08569	1.46436	0.0437216	1.49629	0	27174920	27398997		1					0
ENSG00000120094	HOXB1	homeobox B1	7.31133	2.59273	1.45241	0.0310043	1.49566	17	48528526	48531001							1
ENSG00000150656	CNDP1	carnosine dipeptidase 1	6.56956	2.35029	1.41076	0.0459159	1.48296	18	74534440	74587212							1
ENSG00000248483	POU5F2	POU domain class 5, transcription factor 2	6.12156	2.19286	1.38834	0.0499118	1.48108	5	93733220	93741637							1
ENSG00000233973	LINC01360	long intergenic non-protein coding RNA 1360	6.91239	2.48556	1.50917	0.0346243	1.47561	1	73306170	73355253			1				0
ENSG00000254162	AC009812.3		7.40074	2.68069	1.52499	0.0346032	1.46507	8	80535006	80539135		1					0
ENSG00000188921	HACD4	3-hydroxyacyl-CoA dehydratase 4	8.69825	3.16029	1.35781	0.0299723	1.46067	9	20999515	21031636							1
ENSG00000278616	BEND3P3	BEN domain containing 3 pseudogene 3	9.21602	3.39313	1.45129	0.0204974	1.44153	10	79682997	79685436	1						0
ENSG00000170629	DPY19L2P2	DPY19L2 pseudogene 2	8.22564	3.04652	1.37641	0.0208305	1.43297	7	103175133	103280410	1						0
ENSG00000197927	C2orf27A	chromosome 2 open reading frame 27A	8.33097	3.11892	1.501	0.0250509	1.41744	2	131722375	131767404							1
ENSG00000143520	FLG2	filaggrin family member 2	11.3692	4.2564	1.35013	0.0131408	1.41742	1	152348735	152360006							1
ENSG00000108774	AC099811.2	lysine acetyltransferase 2A #or# NA /// RAB5C, member RAS oncogene family #or# NA	7.31133	2.75016	1.43209	0.0325671	1.41062	17	42124976	42155044							1
ENSG00000101367	MAPRE1	microtubule associated protein RP/EB family member 1	13.0204	4.92152	1.30415	0.00973262	1.4036	20	32819893	32850405							1
ENSG00000183638	RP1L1	RP1 like 1	11.3399	4.34435	1.40618	0.0069092	1.3842	8	10606349	10712187							1
ENSG00000151692	RNF144A	ring finger protein 144A	17.072	6.55937	1.38272	0.00209042	1.38	2	6917392	7068286							1
ENSG00000229153	EPHA1-AS1	EPHA1 antisense RNA 1	12.384	4.77598	1.34724	0.00905099	1.37461	7	143407813	143523449							1
ENSG00000083817	ZNF416	zinc finger protein 416	7.90742	3.06867	1.32337	0.0459395	1.36559	19	57571566	57578927							1
ENSG00000285280	AL390957.1		17.9276	6.97545	1.3113	0.00200299	1.36183	1	192167786	192957713		1					0
ENSG00000197223	C1D	C1D nuclear receptor corepressor	12.1489	4.73234	1.27668	0.00970898	1.3602	2	68041130	68110948							1
ENSG00000275175	AC106028.5		7.25746	2.84178	1.26937	0.0481011	1.35267	15	92819598	92819992		1					0
ENSG00000188641	MIR137HG	dihydropyrimidine dehydrogenase #or# MIR137 host gene /// MIR137 host gene /// MIR137 host gene #or# microRNA 137 /// MIR137 host gene #or# microRNA 2682	10.5783	4.14922	1.32402	0.0104619	1.3502	1	97077743	97995000				1			0
ENSG00000153046	CDYL	chromodomain Y like	11.0533	4.42636	1.37982	0.0116565	1.32029	6	4706159	4955551							1
ENSG00000137975	CLCA2	chloride channel accessory 2	7.64065	3.06867	1.26286	0.0447543	1.31608	1	86424086	86456558							1
ENSG00000243978	RTL9	retrotransposon Gag like 9	13.1684	5.28963	1.26311	0.0147357	1.31584	0	110358816	110456334							1
ENSG00000224184	MIR3681HG	MIR3681 host gene	8.09346	3.2638	1.34261	0.0396892	1.3102	2	11848622	12578348				1			0
ENSG00000155008	APOOL	apolipoprotein O like	12.9333	5.26153	1.19729	0.0161914	1.29753	0	85003826	85093316							1
ENSG00000164035	EMCN	endomucin	8.77897	3.57572	1.23354	0.0432026	1.29582	4	100395341	100880126							1
ENSG00000140563	MCTP2	multiple C2 and transmembrane domain containing 2	14.0647	5.74342	1.29252	0.00590245	1.2921	15	94231538	94483952							1
ENSG00000249780	AC093809.1		7.36279	3.03097	1.19907	0.0465749	1.28047	4	12640298	12640637		1					0
ENSG00000233920	AL162595.2		8.73861	3.62002	1.22153	0.0307935	1.2714	1	229223461	229227562		1					0
ENSG00000130368	MAS1	MAS1 proto-oncogene, G protein-coupled receptor	13.8161	5.7272	1.30953	0.00575998	1.27044	6	159906690	159916530							1
ENSG00000182218	HHIPL1	HHIP like 1	14.9251	6.21936	1.24631	0.00743339	1.26291	14	99645110	99680569							1
ENSG00000237378	AL445989.1		7.88056	3.28896	1.23953	0.0495513	1.26067	13	63746741	63751080		1					0
ENSG00000121716	PILRB	paired immunoglobin-like type 2 receptor beta	9.49373	3.97559	1.20218	0.0459004	1.25581	7	100352176	100367733							1
ENSG00000082074	FYB1	FYN binding protein 1	9.82081	4.11746	1.30196	0.0149375	1.25409	5	39105255	39274528							1
ENSG00000226235	LEMD1-AS1	LEMD1 antisense RNA 1	8.42279	3.54461	1.21305	0.0459159	1.24867	1	205373252	205387440							1
ENSG00000162692	VCAM1	vascular cell adhesion molecule 1	13.8002	5.80922	1.26391	0.00692699	1.24827	1	100719742	100739045							1
ENSG00000134698	AGO4	argonaute 4, RISC catalytic component	10.0852	4.24679	1.23411	0.0245888	1.24779	1	35808172	35857890							1
ENSG00000260128	ULK4P2	ULK4 pseudogene 2	9.18901	3.88462	1.19002	0.0422222	1.24214	15	30572738	30600647	1						0
ENSG00000253553	AC090568.2		12.0167	5.0945	1.18988	0.0151079	1.23803	8	88326836	88737134		1					0
ENSG00000136869	TLR4	toll like receptor 4	8.96501	3.80261	1.17552	0.0338766	1.23732	9	117704175	117724730							1
ENSG00000283380	AL807742.1		9.3593	3.98219	1.25382	0.0231888	1.23284	0	20769718	21374265		1					0
ENSG00000236682	AC068282.1		10.0852	4.30664	1.22928	0.0252451	1.2276	2	127389130	127400580		1					0
ENSG00000185313	SCN10A	sodium voltage-gated channel alpha subunit 10	11.6089	4.97111	1.21515	0.0212326	1.22359	3	38696807	38816217							1
ENSG00000204740	MALRD1	MAM and LDL receptor class A domain containing 1	14.9544	6.43664	1.23321	0.00611968	1.21619	10	19048771	19790401							1
ENSG00000237693	IRGM	immunity related GTPase M	10.287	4.43597	1.1623	0.0286385	1.21349	5	150846523	150900736							1
ENSG00000276176	MIR6090	microRNA 6090	11.8821	5.18245	1.20917	0.0213594	1.19709	11	128522390	128522449				1			0
ENSG00000219926	OR7E104P	olfactory receptor family 7 subfamily E member 104 pseudogene	14.6092	6.44559	1.15804	0.0125767	1.18049	13	63828840	63844125	1						0
ENSG00000186526	CYP4F8	cytochrome P450 family 4 subfamily F member 8	9.5698	4.26894	1.14043	0.0380954	1.16461	19	15615218	15630638							1
ENSG00000166349	RAG1	recombination activating 1	8.19638	3.65773	1.14744	0.0443699	1.16404	11	36510709	36593156							1
ENSG00000171368	TPPP	tubulin polymerization promoting protein	14.3987	6.45219	1.16956	0.00901641	1.15807	5	659862	693395							1
ENSG00000163673	DCLK3	doublecortin like kinase 3	10.1927	4.57124	1.12104	0.0456369	1.15688	3	36712422	36764349							1
ENSG00000248441	LINC01197	long intergenic non-protein coding RNA 1197	13.4305	6.02357	1.11376	0.0170009	1.15682	15	95209099	95327129			1				0
ENSG00000283167	AC140479.7		12.5589	5.65179	1.14878	0.0153953	1.15193	2	110321402	110348941		1					0
ENSG00000183421	RIPK4	receptor interacting serine/threonine kinase 4 #or# microRNA 6814 /// receptor interacting serine/threonine kinase 4	20.7307	9.36344	1.1055	0.00453421	1.14666	21	41739369	41767106							1
ENSG00000222724	RNU2-63P	RNA, U2 small nuclear 63, pseudogene	16.514	7.47288	1.19283	0.00540233	1.14395	2	88016354	88016547	1						0
ENSG00000152578	GRIA4	glutamate ionotropic receptor AMPA type subunit 4	9.88561	4.49583	1.07126	0.0415289	1.13674	11	105609994	105982092							1
ENSG00000145536	ADAMTS16	ADAM metallopeptidase with thrombospondin type 1 motif 16	9.63476	4.40421	1.16395	0.0344231	1.12937	5	5140330	5320304							1
ENSG00000165259	HDX	highly divergent homeobox	11.9408	5.46261	1.20916	0.0120902	1.12824	0	84317874	84502479							1
ENSG00000236051	AC001226.2	MYCBP2 antisense RNA 1 #or# NA /// NA	11.712	5.3968	1.10237	0.0271371	1.11781	13	77026767	77129717							1
ENSG00000258588	TRIM6-TRIM34	tripartite motif containing 6 #or# TRIM6-TRIM34 readthrough /// TRIM6-TRIM34 readthrough #or# tripartite motif containing 34	7.69452	3.55055	1.16926	0.0468874	1.11579	11	5596725	5644398							1
ENSG00000150394	CDH8	cadherin 8	11.3201	5.24532	1.11631	0.027053	1.10978	16	61647242	62037035							1
ENSG00000095485	CWF19L1	CWF19 like 1, cell cycle control (S. pombe)	15.6716	7.26814	1.12481	0.00961581	1.10849	10	100232298	100267680							1
ENSG00000276540	REXO1L10P	REXO1 like 10, pseudogene	11.4878	5.34289	1.0714	0.0414456	1.10442	8	85744543	85748373	1						0
ENSG00000257443	AC068305.2		9.24287	4.3288	1.11448	0.040182	1.09438	12	58920639	59064238		1					0
ENSG00000233766	AC098617.1		9.70438	4.5653	1.02578	0.0489615	1.08793	2	191846539	192044525		1					0
ENSG00000168314	MOBP	myelin-associated oligodendrocyte basic protein	10.3788	4.8957	1.0684	0.0374206	1.08405	3	39467198	39529479							1
ENSG00000285492	AL356417.3		17.3474	8.24453	1.07779	0.00848228	1.07321	6	159051674	159121495		1					0
ENSG00000162267	ITIH3	inter-alpha-trypsin inhibitor heavy chain 3	16.3817	7.80695	1.04928	0.0103463	1.06925	3	52794768	52809009							1
ENSG00000164270	HTR4	5-hydroxytryptamine receptor 4	14.7683	7.08856	1.04272	0.0152605	1.05894	5	148451032	148677235							1
ENSG00000250822	LINC02111	long intergenic non-protein coding RNA 2111	25.3198	12.2052	1.04039	0.0010544	1.05277	5	17378906	17387310			1				0
ENSG00000232117	LINC00384	long intergenic non-protein coding RNA 384	12.2542	5.9326	1.02342	0.0381966	1.04654	13	30151886	30159621			1				0
ENSG00000235370	DNM1P51	dynamin 1 pseudogene 51 #or# chondroitin sulfate proteoglycan 4 pseudogene 5 /// dynamin 1 pseudogene 51	15.1223	7.33101	1.04501	0.0139576	1.04459	15	84398316	84411701	1						0
ENSG00000233723	LINC01122	long intergenic non-protein coding RNA 1122	11.21	5.44045	1.01968	0.046504	1.04298	2	58427799	59063766			1				0
ENSG00000131263	RLIM	ring finger protein, LIM domain interacting	28.3288	13.761	1.03999	0.00117338	1.04168	0	74585217	74614617							1
ENSG00000104756	KCTD9	potassium channel tetramerization domain containing 9	25.7275	12.611	1.03671	0.00148833	1.02862	8	25427847	25458476							1
ENSG00000127743	IL17B	interleukin 17B	8.94926	4.40421	1.08958	0.0488884	1.02288	5	149371324	149404202							1
ENSG00000199753	SNORD104	small nucleolar RNA, C/D box 104	11.9249	5.87869	1.03018	0.0329535	1.02041	17	64146083	64146152					1		0
ENSG00000273080	AC009309.1		14.3583	7.07895	1.0473	0.0163624	1.02028	2	86195590	86196049		1					0
ENSG00000226902	CHCHD2P1	coiled-coil-helix-coiled-coil-helix domain containing 2 pseudogene 1	22.4897	11.1587	1.02627	0.00408131	1.0111	0	123785009	123785451	1						0
ENSG00000272173	U47924.2		59.1876	29.8376	1.01101	2.34194e-06	0.988162	12	6943508	6944604		1					0
ENSG00000280331	AC061999.1		10.6274	5.43744	1.01589	0.0469818	0.966787	11	36510361	36510537		1					0
ENSG00000232077	LINC01031	long intergenic non-protein coding RNA 1031	2.57909	0	4.13522	0.0353501	?	1	193304745	193365953			1				0
ENSG00000242540	AC108025.2		2.56559	0	4.07573	0.0124681	?	2	5696220	5708095		1					0
ENSG00000237178	AC019080.2		3.17278	0	4.40467	0.00523758	?	2	177344443	177344836		1					0
ENSG00000279544	AL133243.4		3.0406	0	4.36877	0.00195309	?	2	32563328	32566436		1					0
ENSG00000236502	SIX3-AS1	SIX3 antisense RNA 1	2.39305	0	4.01329	0.00625249	?	2	44940154	44941873							1
ENSG00000249290	AC010181.1		2.89491	0	4.2636	0.010942	?	3	140449435	140460351		1					0
ENSG00000179170	OR7E97P	olfactory receptor family 7 subfamily E member 97 pseudogene	2.11519	0	3.81967	0.0283331	?	3	125747084	125748098	1						0
ENSG00000261292	AC110491.1		3.81792	0	4.64617	0.00356875	?	3	97759523	97761532		1					0
ENSG00000234548	LINC02020	long intergenic non-protein coding RNA 2020	2.72238	0	4.19953	0.0468979	?	3	186440345	186450696			1				0
ENSG00000261826	AC121333.1		2.49597	0	4.06011	0.0193526	?	3	140865075	140867783		1					0
ENSG00000250144	AC104619.3		2.03447	0	3.78683	0.0241654	?	4	135045464	135046850		1					0
ENSG00000169245	CXCL10	C-X-C motif chemokine ligand 10	2.24736	0	3.86837	0.0165469	?	4	76021117	76023497							1
ENSG00000248863	AC097376.1		2.85455	0	4.2436	0.00542771	?	4	139426299	139430884		1					0
ENSG00000251463	FKBP4P1	FK506 binding protein 4 pseudogene 1	2.11519	0	3.81667	0.0194511	?	4	118193405	118194751	1						0
ENSG00000082929	LINC01587	long intergenic non-protein coding RNA 1587	2.94878	0	4.33346	0.00677707	?	4	5524569	5527801			1				0
ENSG00000171560	FGA	fibrinogen alpha chain	5.07731	0	5.0293	0.000419456	?	4	154583126	154590766							1
ENSG00000250426	FTLP10	ferritin light chain pseudogene 10	2.32808	0	3.90199	0.0178368	?	4	68182292	68212470	1						0
ENSG00000251253	MTHFD2P4	methylenetetrahydrofolate dehydrogenase (NADP+ dependent) 2, methenyltetrahydrofolate cyclohydrolase pseudogene 4	2.07483	0	3.80265	0.0264271	?	4	162322188	162323907	1						0
ENSG00000250332	AC010460.3		3.491	0	4.54495	0.00253932	?	5	23303565	23305143		1					0
ENSG00000248717	LINC02222	long intergenic non-protein coding RNA 2222	2.67091	0	4.1814	0.0113894	?	5	180684766	180686546			1				0
ENSG00000251311	LINC02214	long intergenic non-protein coding RNA 2214	2.16905	0	3.90277	0.0451082	?	5	116742991	116762209			1				0
ENSG00000248966	BCLAF1P1	BCL2 associated transcription factor 1 pseudogene 1	2.16905	0	3.92832	0.0150552	?	5	110948029	110950780	1						0
ENSG00000220553	RPL5P19	ribosomal protein L5 pseudogene 19	2.56559	0	4.06314	0.00681613	?	6	92013842	92014734	1						0
ENSG00000211749	TRBV23-1	T cell receptor beta variable 23-1 (non-functional)	2.32808	0	3.92106	0.031304	?	7	142645961	142646467							1
ENSG00000274970	AC013470.4		2.28772	0	3.91265	0.0486618	?	7	12439419	12440404		1					0
ENSG00000197320	AC060834.1		3.17278	0	4.40165	0.00328516	?	7	9726241	9728272		1					0
ENSG00000213711	PHBP7	prohibitin pseudogene 7	2.28772	0	3.8749	0.0131957	?	9	85898903	85899716	1						0
ENSG00000237257	MTND2P8	mitochondrially encoded NADH:ubiquinone oxidoreductase core subunit 2 pseudogene 8	2.76273	0	4.21612	0.019404	?	9	78741720	78742744	1						0
ENSG00000256189	AP003717.2		2.28772	0	3.89764	0.0259653	?	11	73991283	73992180		1					0
ENSG00000256937	KRT17P8	keratin 17 pseudogene 8	3.30496	0	4.45661	0.0131714	?	12	9127783	9128645	1						0
ENSG00000258565	BLZF2P	basic leucine zipper nuclear factor 2 pseudogene	2.30123	0	3.97059	0.0259183	?	14	68867857	68869951	1						0
ENSG00000278143	NF1P7	neurofibromin 1 pseudogene 7	2.44451	0	4.03289	0.00921554	?	14	18899942	18909673	1						0
ENSG00000211949	IGHV3-23	immunoglobulin heavy variable 3-23	2.16665	0	3.84554	0.0252437	?	14	106268606	106269140							1
ENSG00000258768	AL356019.2		2.02337	0	3.77809	0.019009	?	14	20260480	20264308		1					0
ENSG00000258611	AC087641.1	NA /// repulsive guidance molecule BMP co-receptor a #or# NA	2.33918	0	3.90443	0.0147491	?	15	93065586	93066606							1
ENSG00000260922	AC009139.1		2.75163	0	4.20839	0.0166455	?	16	77234877	77290934		1					0
ENSG00000261127	AC133548.2		2.11519	0	3.81586	0.0177608	?	16	32289547	32310555		1					0
ENSG00000279887	AC046158.4		2.15554	0	3.82714	0.0146806	?	16	78525189	78526535		1					0
ENSG00000225127	LINC00237	long intergenic non-protein coding RNA 237	2.30123	0	3.98107	0.0100026	?	20	21087604	21106358			1				0
ENSG00000225091	SNORA71A	small nucleolar RNA, H/ACA box 71A	2.26087	0	3.95675	0.0222006	?	20	38427309	38427442					1		0
ENSG00000224832	LINC01689	long intergenic non-protein coding RNA 1689	2.56559	0	4.0848	0.0222764	?	21	24304546	24321377			1				0
ENSG00000273188	AL022328.3		2.71127	0	4.19658	0.0056295	?	22	50191724	50192402		1					0
ENSG00000224775	BRAFP1	BRAF pseudogene 1	3.12132	0	4.38598	0.00427295	?	0	75582676	75585506	1						0
ENSG00000238210	ETDA	embryonic testis differentiation homolog A	2.20701	0	3.86692	0.0328081	?	0	135252061	135253583							1
ENSG00000184515	BEX5	brain expressed X-linked 5	6.01623	11.7729	-1.00001	0.041767	-0.968541	0	102153708	102156057							1
ENSG00000243811	APOBEC3D	apolipoprotein B mRNA editing enzyme catalytic subunit 3D #or# NA /// apolipoprotein B mRNA editing enzyme catalytic subunit 3D	6.10805	12.0412	-1.05784	0.0358363	-0.979194	22	39021113	39033276							1
ENSG00000258748	AL359399.1		6.21338	12.4159	-1.01182	0.0363834	-0.998739	14	104137150	104137898		1					0
ENSG00000121905	HPCA	hippocalcin	6.61232	13.2444	-1.0062	0.0336363	-1.00215	1	32885994	32898441							1
ENSG00000231327	LINC01816	long intergenic non-protein coding RNA 1816	10.9345	21.9235	-1.01064	0.00673017	-1.00359	2	70124036	70125317			1				0
ENSG00000101040	ZMYND8	zinc finger MYND-type containing 8	12.5051	25.2826	-1.05826	0.00228565	-1.01563	20	47209214	47356889							1
ENSG00000277972	CISD3	CDGSH iron sulfur domain 3	5.79223	11.7293	-1.02876	0.0392539	-1.01792	17	38730235	38735044							1
ENSG00000169840	GSX1	GS homeobox 1	6.11915	12.3967	-1.04172	0.0319521	-1.01855	13	27792643	27794768							1
ENSG00000261064	LINC02256	long intergenic non-protein coding RNA 2256	7.07382	14.3885	-1.06821	0.0237045	-1.02435	15	32536047	32587613			1				0
ENSG00000225822	UBXN7-AS1	UBXN7 antisense RNA 1	7.27097	14.8482	-1.04386	0.0146695	-1.03007	3	196431385	196432530							1
ENSG00000250751	AC015795.1		10.3005	21.1334	-1.03361	0.00538657	-1.03681	17	49708334	49720060		1					0
ENSG00000183971	NPW	neuropeptide W	6.0923	12.5703	-1.00661	0.0390689	-1.04496	16	2009926	2020755							1
ENSG00000184619	KRBA2	KRAB-A domain containing 2	9.90152	20.5066	-1.0441	0.00957281	-1.05037	17	8368637	8376711							1
ENSG00000167995	BEST1	bestrophin 1	14.1612	29.4592	-1.05315	0.00118454	-1.05678	11	61949821	61965515							1
ENSG00000212951	BX005266.1		9.25398	19.2643	-1.03128	0.0101408	-1.05778	9	62532397	62532853		1					0
ENSG00000198049	AVPR1B	arginine vasopressin receptor 1B	5.63079	11.767	-1.03967	0.0448947	-1.06333	1	206109692	206117699							1
ENSG00000281383	FP671120.4		183.845	385.833	-1.07384	4.42365e-10	-1.06949	21	8254592	8255514		1					0
ENSG00000137880	GCHFR	GTP cyclohydrolase I feedback regulator	8.56847	17.9857	-1.03462	0.0140258	-1.06974	15	40764020	40767710							1
ENSG00000253549	CA3-AS1	CA3 antisense RNA 1	4.5708	9.59627	-1.09327	0.0485606	-1.07003	8	85441851	85464915							1
ENSG00000064666	CNN2	calponin 2	5.94902	12.526	-1.0177	0.0421344	-1.0742	19	1026581	1039068							1
ENSG00000186462	NAP1L2	nucleosome assembly protein 1 like 2	8.81708	18.5873	-1.01116	0.0102446	-1.07594	0	73212299	73214848							1
ENSG00000245888	AC106739.1		4.95864	10.4876	-1.10905	0.0371507	-1.08067	16	27268205	27290492		1					0
ENSG00000177989	ODF3B	outer dense fiber of sperm tails 3B	4.5597	9.7537	-1.10555	0.0481466	-1.09701	22	50529710	50532580							1
ENSG00000250295	RDH10-AS1	RDH10 antisense RNA 1	8.83043	18.9405	-1.11834	0.00665888	-1.10092	8	73297711	73356461							1
ENSG00000132801	ZSWIM3	zinc finger SWIM-type containing 3	7.12769	15.3175	-1.09928	0.0122961	-1.10368	20	45857617	45879122							1
ENSG00000227050	AL512288.1		5.43365	11.682	-1.0951	0.0353467	-1.10429	1	27938875	27960193		1					0
ENSG00000167945	PRR25	proline rich 25	9.99334	21.647	-1.11545	0.00354362	-1.11513	16	805443	813861							1
ENSG00000185561	TLCD2	TLC domain containing 2	7.3763	16.0323	-1.07899	0.0142902	-1.12001	17	1702790	1710438							1
ENSG00000167459	LINC00905	long intergenic non-protein coding RNA 905	6.20228	13.4905	-1.14783	0.0156531	-1.12107	19	16031307	16042116			1				0
ENSG00000169668	BCRP2	breakpoint cluster region pseudogene 2	17.4259	37.9823	-1.09211	0.000205594	-1.12409	22	21103016	21122285	1						0
ENSG00000275329	AL138781.2		5.43365	11.849	-1.12217	0.0251658	-1.12477	9	136122521	136124363		1					0
ENSG00000253445	AC027309.1		7.08733	15.5127	-1.11065	0.0164024	-1.13013	5	172690454	172697720		1					0
ENSG00000204237	OXLD1	oxidoreductase like domain containing 1	16.8076	36.87	-1.10116	0.000275818	-1.13333	17	81665036	81666635							1
ENSG00000155629	PIK3AP1	phosphoinositide-3-kinase adaptor protein 1	4.54859	9.98059	-1.1449	0.0384138	-1.1337	10	96593312	96720514							1
ENSG00000262172	AC116025.2		5.47401	12.1202	-1.15074	0.025352	-1.14674	17	79991944	79992841		1					0
ENSG00000283098	AL132857.2		4.90253	10.9097	-1.08362	0.0468082	-1.15401	14	36320753	36656163		1					0
ENSG00000162576	MXRA8	matrix remodeling associated 8	13.0632	29.3084	-1.16028	0.000394544	-1.16581	1	1352689	1361777							1
ENSG00000178150	ZNF114	zinc finger protein 114	7.40555	16.7861	-1.18474	0.00570585	-1.18059	19	48270102	48287608							1
ENSG00000279243	AP000769.3		10.4462	23.7942	-1.13769	0.00344284	-1.18764	11	65487241	65488136		1					0
ENSG00000225511	LINC00475	long intergenic non-protein coding RNA 475	5.02361	11.509	-1.18223	0.01884	-1.19597	9	92141298	92160114			1				0
ENSG00000174547	MRPL11	mitochondrial ribosomal protein L11	11.6605	26.7187	-1.1609	0.000671117	-1.19622	11	66435075	66466738							1
ENSG00000185669	SNAI3	snail family transcriptional repressor 3	5.39329	12.4033	-1.1559	0.0269535	-1.20148	16	88677682	88686493							1
ENSG00000128965	CHAC1	ChaC glutathione specific gamma-glutamylcyclotransferase 1	18.9854	43.8699	-1.17159	1.17621e-05	-1.20834	15	40952962	40956519							1
ENSG00000164385	LINC01600	long intergenic non-protein coding RNA 1600	4.97214	11.5401	-1.18947	0.0207986	-1.21471	6	2621913	2634603			1				0
ENSG00000231742	LINC01273	long intergenic non-protein coding RNA 1273	4.50824	10.614	-1.2285	0.0269312	-1.23533	20	50172550	50176671			1				0
ENSG00000285367	AC087564.1		7.19266	16.965	-1.18595	0.00425447	-1.23796	16	51150770	51442519		1					0
ENSG00000172432	GTPBP2	GTP binding protein 2	6.67729	15.9982	-1.24215	0.00487331	-1.26058	6	43605316	43629162							1
ENSG00000102981	PARD6A	par-6 family cell polarity regulator alpha	4.61356	11.0774	-1.22448	0.0227599	-1.26366	16	67660946	67662778							1
ENSG00000161921	CXCL16	C-X-C motif chemokine ligand 16	5.39569	12.9857	-1.16127	0.0247736	-1.26705	17	4733526	4739922							1
ENSG00000273064	AC017083.1		5.14228	12.4278	-1.32105	0.0126233	-1.27309	2	68252870	68253848		1					0
ENSG00000261798	AL033527.3		8.35557	20.2264	-1.20344	0.00295258	-1.27543	1	39788976	39790171		1					0
ENSG00000124074	ENKD1	enkurin domain containing 1	10.5087	25.5686	-1.23797	0.000869398	-1.28279	16	67662945	67667265							1
ENSG00000204616	TRIM31	tripartite motif containing 31	4.74574	11.6006	-1.30136	0.0116215	-1.2895	6	30102897	30113106							1
ENSG00000266718	AC079336.5		6.17542	15.1032	-1.21903	0.00787861	-1.29024	17	32495536	32499333		1					0
ENSG00000262413	AC145207.2		9.01647	22.16	-1.29832	0.00164193	-1.29732	17	81867721	81868552		1					0
ENSG00000108298	RPL19	ribosomal protein L19	6.58547	16.2532	-1.25657	0.00458028	-1.30337	17	39200283	39204727							1
ENSG00000182759	MAFA	MAF bZIP transcription factor A	4.64041	11.7203	-1.3934	0.0120687	-1.33669	8	143419182	143430406							1
ENSG00000239697	TNFSF12	TNF superfamily member 12 #or# TNFSF12-TNFSF13 readthrough /// TNF superfamily member 12	4.06024	10.2607	-1.22477	0.0308622	-1.3375	17	7548891	7557890							1
ENSG00000276851	AC002401.4		7.11418	18.1216	-1.39851	0.00177644	-1.34894	17	50094065	50094647		1					0
ENSG00000125726	CD70	CD70 molecule	4.06024	10.4661	-1.27121	0.0192096	-1.36609	19	6583183	6604103							1
ENSG00000277602	AC005363.2		4.65392	12.0656	-1.31984	0.0149891	-1.37438	16	1971655	1971896		1					0
ENSG00000276687	AL356130.1		2.56559	6.70425	-1.48421	0.0443398	-1.38579	6	905445	909006		1					0
ENSG00000284625	AP000867.4		3.00024	7.84165	-1.34097	0.0483453	-1.38608	11	71639551	71639769		1					0
ENSG00000092054	MYH7	myosin heavy chain 7	8.43148	22.5263	-1.42329		-1.41775	14	23412738	23435718							1
ENSG00000118292	C1orf54	chromosome 1 open reading frame 54	4.3357	11.5999	-1.39514	0.0105871	-1.41978	1	150268200	150280916							1
ENSG00000198106	AC025279.1		3.68815	9.92007	-1.38274	0.0279369	-1.42745	16	29291220	29372110		1					0
ENSG00000123999	INHA	inhibin subunit alpha	2.48487	6.71679	-1.46515	0.0418265	-1.4346	2	219569162	219575713							1
ENSG00000267070	AC026458.2		2.63056	7.20234	-1.4299	0.0365518	-1.4531	16	5098739	5142595		1					0
ENSG00000243224	AC006252.1		4.7861	13.1313	-1.4454	0.00445508	-1.45608	3	52239258	52241097		1					0
ENSG00000182257	PRR34	proline rich 34	4.17891	11.5999	-1.49821	0.00796233	-1.47292	22	46049478	46054144							1
ENSG00000100288	CHKB	choline kinase beta	6.04324	17.2044	-1.42094	0.00235241	-1.50938	22	50578949	50601455							1
ENSG00000225632	AL161644.1		3.0406	8.66655	-1.47971	0.0193307	-1.5111	1	54285405	54287371		1					0
ENSG00000264273	AC107982.2		2.28772	6.76411	-1.68708	0.040014	-1.56399	17	18859354	18861466		1					0
ENSG00000197044	ZNF441	zinc finger protein 441	3.22664	9.65613	-1.50416	0.0133972	-1.58141	19	11767000	11784078							1
ENSG00000198894	AC007375.2	CLOCK interacting pacemaker #or# NA /// transmembrane protein 63C #or# NA	2.5902	7.90451	-1.54896	0.0222469	-1.60962	14	77098097	77117287							1
ENSG00000129451	KLK10	kallikrein related peptidase 10	3.18628	9.82317	-1.53643	0.00909666	-1.62431	19	51012739	51020175							1
ENSG00000158516	CPA2	carboxypeptidase A2	2.16905	6.77071	-1.53936	0.0341009	-1.64224	7	130266827	130289798							1
ENSG00000264063	MIR3687-2	microRNA 3687-2	5.06156	16.3048	-1.71422	0.0341886	-1.68764	21	8987370	8987430				1			0
ENSG00000278041	AL133325.3		2.02337	6.59707	-1.69304	0.0345613	-1.70507	20	21499261	21502934		1					0
ENSG00000262001	DLGAP1-AS2	DLGAP1 antisense RNA 2	4.73464	15.7462	-1.71569	0.000786675	-1.73367	18	3603000	3608336							1
ENSG00000132639	SNAP25	synaptosome associated protein 25	1.57296	5.28963	-1.65049	0.0492623	-1.74968	20	10218830	10307418							1
ENSG00000231105	AL031728.1		1.38692	4.67842	-1.7868	0.0459218	-1.75414	1	21293290	21299774		1					0
ENSG00000267751	AC009005.1		2.61945	8.91559	-1.70414	0.0113133	-1.76707	19	567210	572228		1					0
ENSG00000238260	AL513320.1		3.54487	12.1261	-1.6921	0.0030616	-1.77432	1	3623190	3624743		1					0
ENSG00000229376	CICP3	capicua transcriptional repressor pseudogene 3	1.87768	6.55871	-1.89347	0.0229711	-1.80446	1	722092	724903	1						0
ENSG00000265817	FSBP	fibrinogen silencer binding protein	2.48487	8.81209	-1.88708	0.00601925	-1.82631	8	94372170	94436952							1
ENSG00000211786	TRAV8-2	T cell receptor alpha variable 8-2	3.59633	12.7559	-1.77503	0.00256504	-1.82657	14	21846537	21847221							1
ENSG00000280407	AC132872.4		1.46764	5.22383	-1.96476	0.0293265	-1.83161	17	82249067	82251844		1					0
ENSG00000248727	LINC01948	long intergenic non-protein coding RNA 1948	1.98301	7.10111	-1.77715	0.0215469	-1.84035	5	56457795	56481946			1				0
ENSG00000225285	LINC01770	long intergenic non-protein coding RNA 1770	3.00024	10.8283	-1.82247	0.00403681	-1.85166	1	1430539	1434573			1				0
ENSG00000272821	U62317.3		1.61332	5.91639	-1.79586	0.0321341	-1.87468	22	50523926	50524780		1					0
ENSG00000173110	HSPA6	heat shock protein family A (Hsp70) member 6	3.16168	11.8801	-1.94234	0.0040065	-1.90979	1	161524540	161526910							1
ENSG00000259692	AC104041.1		1.09795	4.40421	-2.05828	0.04045	-2.00407	15	81660482	81871125		1					0
ENSG00000100079	LGALS2	galectin 2	1.33546	5.41896	-2.00997	0.0320689	-2.02068	22	37570246	37582616							1
ENSG00000148948	LRRC4C	leucine rich repeat containing 4C	1.05759	4.3222	-2.05448	0.0437561	-2.03098	11	40114203	41459773							1
ENSG00000270182	AC004080.4		1.38692	5.97031	-2.13334	0.0180888	-2.10592	7	27158344	27158976		1					0
ENSG00000227189	AC092535.1		1.20328	5.27342	-1.9614	0.0453223	-2.13177	4	1151372	1153701		1					0
ENSG00000264569	AC137723.1		1.05759	5.05313	-2.25335	0.0307448	-2.25639	17	82037905	82039380		1					0
ENSG00000283268	TEX54	testis expressed 54	0.687908	3.42489	-2.3878	0.0485322	-2.31577	11	62832319	62832803							1
ENSG00000162398	LEXM	lymphocyte expansion molecule	1.14941	5.82477	-2.44973	0.0114821	-2.3413	1	54806063	54842252							1
ENSG00000274367	AC004233.4		0.965773	4.92747	-2.29258	0.0255188	-2.35109	16	2981175	2981591		1					0
ENSG00000196364	PRSS29P	serine protease 29, pseudogene	1.38692	7.22383	-2.38922	0.00466433	-2.38088	16	1260952	1263845	1						0
ENSG00000253405	EVX1-AS	EVX1 antisense RNA	0.647549	4.02583	-2.52322	0.0483602	-2.63623	7	27241429	27247229							1
ENSG00000163815	CLEC3B	C-type lectin domain family 3 member B /// exosome component 7 #or# C-type lectin domain family 3 member B	0.410044	2.67474	-2.83448	0.0446098	-2.70555	3	45001548	45036071							1
ENSG00000226029	LINC01772	long intergenic non-protein coding RNA 1772	0.410044	2.77231	-2.85557	0.0378886	-2.75724	1	16460948	16468481			1				0
ENSG00000120664	SPART-AS1	SPART antisense RNA 1	0.647549	4.40421	-2.6753	0.0338461	-2.76582	13	36346431	36369601							1
ENSG00000213231	TCL1B	T cell leukemia/lymphoma 1B #or# NA /// T cell leukemia/lymphoma 1B	0.687908	4.73828	-2.79673	0.0195428	-2.78407	14	95686417	95692643							1
ENSG00000279518	AC083843.4		0.410044	2.92973	-2.91158	0.0469953	-2.83692	8	134783694	134785879		1					0
ENSG00000229816	DDX50P1	DEAD-box helicase 50 pseudogene 1	0.410044	2.97705	-2.98387	0.038584	-2.86003	2	32201600	32203999	1						0
ENSG00000276317	AL357033.3		0.555729	4.17732	-2.59721	0.0293133	-2.91012	20	62651272	62652186		1					0
ENSG00000249054	FAM138D	family with sequence similarity 138 member D	0.555729	4.24679	-2.67434	0.0325559	-2.93392	12	36602	38133							1
ENSG00000231971	AL078590.2		0.410044	3.14408	-3.08016	0.0478088	-2.93879	6	134428240	134520585		1					0
ENSG00000113248	AC244517.10	protocadherin beta 15 #or# NA /// protocadherin beta 14 #or# NA	0.369684	3.04652	-3.06463	0.0260924	-3.0428	5	141245349	141249365							1
ENSG00000178342	KCNG2	potassium voltage-gated channel modifier subfamily G member 2	0.410044	3.49069	-3.21929	0.0448345	-3.08966	18	79863668	79900184							1
ENSG00000223569	USP17L15	ubiquitin specific peptidase 17-like family member 15	0.410044	3.88462	-3.39857	0.0107494	-3.24392	4	9234385	9236334							1
ENSG00000159251	ACTC1	actin, alpha, cardiac muscle 1	1.83732	17.8101	-3.30484	0.0310832	-3.27702	15	34788096	34796139							1
ENSG00000230107	AL022316.1		0.410044	4.03545	-3.4288	0.0153057	-3.29888	22	42438023	42446195		1					0
ENSG00000197272	IL27	interleukin 27	0.277864	2.82623	-2.94123	0.0364362	-3.34642	16	28499362	28512051							1
ENSG00000258512	LINC00239	long intergenic non-protein coding RNA 239	0.277864	2.91719	-2.96811	0.0436379	-3.39213	14	101730437	101732522			1				0
ENSG00000229031	MTCO1P25	mitochondrially encoded cytochrome c oxidase I pseudogene 25	1.46764	46.6137	-5.01522		-4.98919	7	69331835	69333633	1						0
ENSG00000231034	AL118520.1		0.277864	10.0392	-4.74779	0.0285113	-5.17512	20	34688688	34688978		1					0
ENSG00000234576	MTND1P26	mitochondrially encoded NADH:ubiquinone oxidoreductase core subunit 1 pseudogene 26	0.647549	32.5457	-5.62798		-5.65133	2	131385700	131386237	1						0
ENSG00000233026	MTCO1P5	mitochondrially encoded cytochrome c oxidase I pseudogene 5	0	11.0755	-17.5981		?	3	12165299	12165642	1						0
ENSG00000228789	HCG22	HLA complex group 22 (gene/pseudogene)	0	2.02583	-3.43	0.0285835	?	6	31053450	31059890	1						0
ENSG00000231864	AL807752.3		0	2.4257	-3.6555	0.0229937	?	9	137063535	137064581		1					0
ENSG00000258525	AL049830.3		0	2.31258	-3.61009	0.0184344	?	14	30876179	30889808		1					0
ENSG00000259582	AC026523.1		0	2.28082	-3.53552	0.028297	?	15	97540597	97560702		1					0
ENSG00000274798	AC025166.1		0	2.48556	-3.68183	0.0327637	?	15	40874433	40874595		1					0
ENSG00000267568	AC016168.2		0	2.1611	-3.48785	0.0411309	?	17	76950317	76969156		1					0
ENSG00000267456	AC023043.3		0	2.12339	-3.46908	0.0343495	?	18	36278735	36279119		1					0
ENSG00000266989	FTLP5	ferritin light chain pseudogene 5	0	2.28082	-3.52016	0.0164275	?	19	3870991	3872107	1						0
ENSG00000213022	KLK9	kallikrein related peptidase 9 #or# NA /// kallikrein related peptidase 9	0	2.54542	-3.69828	0.0182983	?	19	51003111	51009634							1
ENSG00000187116	LILRA5	leukocyte immunoglobulin like receptor A5 /// leukocyte immunoglobulin like receptor A5 #or# NA	0	2.83217	-3.82706	0.00499455	?	19	54307070	54313139							1
ENSG00000225357	RPF2P1	ribosome production factor 2 homolog pseudogene 1	0	2.86393	-3.90902	0.0096302	?	20	35752814	35753719	1						0
ENSG00000228503	AL357558.1		0	2.90164	-3.92028	0.0211227	?	20	47958022	47958603		1					0
ENSG00000237428	ASH2LP2	ASH2L pseudogene 2	0	2.00367	-3.4145	0.0451306	?	22	22366210	22367770	1						0
ENSG00000232267	ACTR3P2	ACTR3 pseudogene 2	0	2.22096	-3.51659	0.0462746	?	0	68771322	68772578	1						0
