# Supplementary material for: The role of reciprocal fusions in MLL-r acute leukemia: studying the chromosomal translocation t(6;11)
Source: Oncogene. 2021 Aug 5;40(40):5902–12. doi: 10.1038/s41388-021-01983-3 (PMC8497272; doi:10.1038/s41388-021-01983-3)
Supplement: Supplementary file 10 — ATAC-Seq MLL-AF6/AF6-MLL [file 41388_2021_1983_MOESM10_ESM.xlsx]

## Sheet: Sheet1
ID	gene symbol	gene	mean exp	mean mock	log2	pvalue	var-log2	chrom	begin	end	PG	NA	LINC	MIR	SNO	MT	PCG
ENSG00000232818	RPS2P32	ribosomal protein S2 pseudogene 32	18.3972	0.226893	5.98965	2.19237e-06	6.34133	7	23490473	23491364	1						0
ENSG00000163530	DPPA2	developmental pluripotency associated 2	13.2537	0.264599	5.518	1.97223e-05	5.64644	3	109293788	109316517							1
ENSG00000249249	AC010226.1		7.69121	0.226893	4.72589	0.0026086	5.08313	5	115602057	115620659		1					0
ENSG00000254229	FAM90A12P	family with sequence similarity 90 member A12, pseudogene	6.84657	0.264599	4.5597	0.000603722	4.6935	8	8027077	8032305	1						0
ENSG00000135314	KHDC1	KH domain containing 1	35.9917	1.83664	4.26663	1.34244e-10	4.29252	6	73241314	73310365							1
ENSG00000164334	FAM170A	family with sequence similarity 170 member A	4.33343	0.226893	3.91475	0.0078169	4.25542	5	119629559	119635822							1
ENSG00000275011	AC129492.6		5.88473	0.324458	4.33696	0.00187546	4.18087	17	8063936	8072533		1					0
ENSG00000232551	MTCO1P14	mitochondrially encoded cytochrome c oxidase I pseudogene 14	3.92821	0.226893	3.78626	0.00762154	4.11379	1	106804474	106806032	1						0
ENSG00000152266	PTH	parathyroid hormone	4.49473	0.264599	3.94771	0.00497196	4.08636	11	13492055	13496181							1
ENSG00000283361	CFAP97D2	CFAP97 domain containing 2	4.40261	0.264599	3.93104	0.00402149	4.05648	13	114154691	114223084							1
ENSG00000189369	GSPT2	G1 to S phase transition 2	11.9329	0.718386	3.92532	0.000151536	4.05404	0	51743431	51746232							1
ENSG00000187601	MAGEH1	MAGE family member H1	8.40001	0.529198	3.98277	0.000962508	3.98851	0	55452105	55453566							1
ENSG00000279302	AC013643.3		4.10117	0.264599	3.8228	0.0068467	3.95416	8	27701194	27703789		1					0
ENSG00000250984	AC108082.1		3.48664	0.226893	3.58149	0.0307549	3.94175	5	29795938	29796268		1					0
ENSG00000203663	OR2L2	olfactory receptor family 2 subfamily L member 2	4.05492	0.264599	3.81161	0.00766649	3.93779	1	248030070	248042305							1
ENSG00000283752	AC241585.4		3.39452	0.226893	3.55311	0.0225527	3.90312	1	145139986	145148375		1					0
ENSG00000182050	AC010196.1	NA /// MGAT4 family member C #or# NA	3.35993	0.226893	3.54487	0.013706	3.88834	12	85955666	86838904							1
ENSG00000256551	LINC02369	long intergenic non-protein coding RNA 2369	3.25439	0.226893	3.46143	0.026148	3.8423	12	128086985	128118132			1				0
ENSG00000219932	RPL12P8	ribosomal protein L12 pseudogene 8	3.22194	0.226893	3.50682	0.0238188	3.82784	10	67874332	67874911	1						0
ENSG00000267173	AC245748.1	zinc finger protein 112 #or# NA /// NA #or# zinc finger protein 285	4.59813	0.324458	3.97718	0.0151436	3.82494	19	44329695	44401608							1
ENSG00000254251	AC103770.1		6.30336	0.453786	3.6427	0.0149031	3.79604	8	90806474	90859240		1					0
ENSG00000271350	AC103792.1		3.67302	0.264599	3.6721	0.0407276	3.79509	11	47041027	47041945		1					0
ENSG00000118058	KMT2A	lysine methyltransferase 2A	441.233	32.2381	3.78949	1.68343e-82	3.7747	11	118436490	118526832							1
ENSG00000186226	LCE1E	late cornified envelope 1E	2.96637	0.226893	3.37242	0.0367116	3.70861	1	152786214	152788426							1
ENSG00000254325	AC018607.1		3.39452	0.264599	3.5531	0.0242006	3.68133	8	55893595	55895739		1					0
ENSG00000124657	OR2B6	olfactory receptor family 2 subfamily B member 6	3.35993	0.264599	3.54155	0.0377192	3.66655	6	27957241	27958182							1
ENSG00000224539	SAGE4P	sarcoma antigen 4, pseudogene	3.31406	0.264599	3.53412	0.0188239	3.64672	0	135598927	135615431	1						0
ENSG00000224177	LINC00570	long intergenic non-protein coding RNA 570	5.66375	0.453786	3.41542	0.00589882	3.64167	2	11393981	11403077			1				0
ENSG00000127362	TAS2R3	taste 2 receptor member 3	2.81458	0.226893	3.26112	0.0359281	3.63283	7	141764097	141765197							1
ENSG00000271344	AC018638.6		2.75705	0.226893	3.24416	0.0387133	3.60304	7	128690451	128691717		1					0
ENSG00000153266	FEZF2	FEZ family zinc finger 2	9.8038	0.81595	3.6351	0.000292851	3.58679	3	62369681	62374324							1
ENSG00000173253	DMRT2	doublesex and mab-3 related transcription factor 2	15.3408	1.28529	3.54122	1.72116e-05	3.57721	9	1049858	1057552							1
ENSG00000235972	AL355497.2		3.15061	0.264599	3.43018	0.0309268	3.57375	6	150040547	150042033		1					0
ENSG00000223343	AC137630.1		6.52219	0.551351	3.60163	0.00738162	3.56431	3	48985049	48989988		1					0
ENSG00000183161	FANCF	Fanconi anemia complementation group F	20.0657	1.70137	3.44789	3.9441e-07	3.55996	11	22622519	22626787							1
ENSG00000218596	AL162578.1		6.23417	0.529198	3.56216	0.0053646	3.55832	6	156976294	156977072		1					0
ENSG00000256188	TAS2R30	taste 2 receptor member 30	3.09308	0.264599	3.41383	0.0391684	3.54717	12	11132958	11134644							1
ENSG00000224960	PPP4R3C	protein phosphatase 4 regulatory subunit 3C	3.07015	0.264599	3.40684	0.0248779	3.53643	0	27460211	27463341							1
ENSG00000204791	SMPD5	sphingomyelin phosphodiesterase 5	7.48404	0.648916	3.77024	0.00174548	3.52771	8	144049079	144051522							1
ENSG00000235436	DPY19L2P4	DPY19L2 pseudogene 4	2.6074	0.226893	3.19693	0.0419575	3.52253	7	90119400	90125600	1						0
ENSG00000198471	RTP2	receptor transporter protein 2	3.03555	0.264599	3.39563	0.0360246	3.52008	3	187698259	187702557							1
ENSG00000258945	AL049775.3		5.47951	0.491492	3.39266	0.0213621	3.47881	14	85528599	85529386		1					0
ENSG00000076242	MLH1	mutL homolog 1	35.2639	3.16624	3.46213	3.05161e-11	3.47735	3	36993332	37050918							1
ENSG00000170681	CAVIN4	caveolae associated protein 4	2.51528	0.226893	3.16685	0.0447105	3.47063	9	100578079	100587906							1
ENSG00000248227	LINC02513	long intergenic non-protein coding RNA 2513	5.4453	0.491492	3.38007	0.013783	3.46977	4	38366914	38385759			1				0
ENSG00000272077	AC124045.1		2.51314	0.226893	3.08153	0.0451233	3.46941	3	44667412	44669364		1					0
ENSG00000226482	ADIPOQ-AS1	ADIPOQ antisense RNA 1	3.53289	0.324458	3.59174	0.0177269	3.44475	3	186851886	186856123							1
ENSG00000245205	EEF1A1P4	eukaryotic translation elongation factor 1 alpha 1 pseudogene 4	2.39809	0.226893	3.04578	0.0422635	3.4018	12	19456244	19457648	1						0
ENSG00000258390	LINC02318	long intergenic non-protein coding RNA 2318	2.79164	0.264599	3.25378	0.0317814	3.39924	14	95573562	95581956			1				0
ENSG00000260645	AL359715.2		8.53838	0.81595	3.41035	0.00140985	3.38741	6	80466958	80469080		1					0
ENSG00000237070	AC005550.2		2.76871	0.264599	3.24857	0.0318679	3.38733	7	15667947	15681980		1					0
ENSG00000281903	LINC02246	long intergenic non-protein coding RNA 2246	2.75705	0.264599	3.24429	0.039494	3.38125	21	14819699	14918552			1				0
ENSG00000243828	AL355357.1		4.72698	0.453786	3.19153	0.0134845	3.38083	6	64728837	64733837		1					0
ENSG00000112232	KHDRBS2	KH RNA binding domain containing, signal transduction associated 2	2.34056	0.226893	3.02939	0.0463149	3.36677	6	61679960	62286227							1
ENSG00000226025	AC005515.1		2.34056	0.226893	3.0288	0.0496251	3.36677	19	39679374	39686373		1					0
ENSG00000184292	TACSTD2	tumor associated calcium signal transducer 2	4.68073	0.453786	3.18503	0.0155816	3.36665	1	58575423	58577773							1
ENSG00000215354	FAM90A24P	family with sequence similarity 90 member A24, pseudogene	4.66946	0.453786	3.17485	0.0105941	3.36317	8	8019429	8024652	1						0
ENSG00000277883	NLRP3P1	NLR family pyrin domain containing 3 pseudogene 1	2.69952	0.264599	3.22683	0.0353324	3.35082	0	107974078	107985008	1						0
ENSG00000270823	AC007938.2		2.66493	0.264599	3.21521	0.038022	3.33222	7	130495794	130498427		1					0
ENSG00000275302	CCL4	C-C motif chemokine ligand 4	2.66493	0.264599	3.21473	0.0403365	3.33222	17	36103590	36105621							1
ENSG00000236397	DDX11L2	DEAD/H-box helicase 11 like 2	12.2823	1.23797	3.50656	5.37259e-05	3.31053	2	113599036	113601261							1
ENSG00000253220	AC084116.1		5.23774	0.529198	3.30412	0.0326259	3.30706	8	126498149	126500303		1					0
ENSG00000214866	DCDC2C	doublecortin domain containing 2C	2.6074	0.264599	3.20455	0.0283374	3.30073	2	3703592	3847411							1
ENSG00000278925	AC005753.1		2.60526	0.264599	3.11571	0.047149	3.29955	5	141825708	141826325		1					0
ENSG00000226662	CHMP1AP1	charged multivesicular body protein 1A pseudogene 1	4.40261	0.453786	3.08459	0.0154517	3.27827	1	27686810	27687471	1						0
ENSG00000197595	ATP11AUN	ATP11A upstream neighbor	3.12767	0.324458	3.42412	0.030422	3.26899	13	112647044	112684497							1
ENSG00000278530	CHMP1B2P	charged multivesicular body protein 1B2, pseudogene	4.72484	0.491492	3.10092	0.00944978	3.26503	0	80228489	80335364	1						0
ENSG00000198482	ZNF808	zinc finger protein 808	5.60836	0.589057	3.38529	0.0072957	3.2511	19	52527652	52564464							1
ENSG00000166569	CPLX4	complexin 4	3.05849	0.324458	3.40158	0.0228492	3.23672	18	59275156	59318649							1
ENSG00000242265	PEG10	paternally expressed 10	11.8062	1.28529	3.15825	5.76472e-05	3.19938	7	94656325	94669695							1
ENSG00000198355	MIR6821	Pim-3 proto-oncogene, serine/threonine kinase #or# microRNA 6821 /// microRNA 6821	4.8537	0.529198	3.17511	0.0170911	3.1972	22	49960513	49964080				1			0
ENSG00000136450	AC015813.2	serine and arginine rich splicing factor 1 #or# NA	2.96637	0.324458	3.37589	0.026455	3.19259	17	58003360	58007346							1
ENSG00000250131	AC078881.1		2.36349	0.264599	3.03448	0.0483309	3.15904	4	177444979	177677126		1					0
ENSG00000250312	ZNF718	zinc finger protein 718	12.8277	1.43677	3.05233	6.89293e-05	3.15836	4	124480	202303							1
ENSG00000249485	RBBP4P1	RB binding protein 4 pseudogene 1	2.88376	0.324458	3.29203	0.0489055	3.15185	5	14797125	14798400	1						0
ENSG00000230439	AL512488.1		4.03199	0.453786	2.96031	0.0192792	3.15141	1	93752924	93775444		1					0
ENSG00000259182	AC019254.1		2.81672	0.324458	3.33068	0.0324597	3.11791	15	101168530	101170821		1					0
ENSG00000185149	NPY2R	neuropeptide Y receptor Y2	6.72937	0.778244	3.05231	0.0027986	3.11218	4	155208629	155217078							1
ENSG00000234653	AC079117.1		6.50102	0.756091	3.06148	0.00411162	3.10403	2	76985965	77009791		1					0
ENSG00000233493	TMEM238	transmembrane protein 238	4.52933	0.529198	3.07314	0.0207836	3.09742	19	55379245	55384598							1
ENSG00000224163	AC025594.1		4.18378	0.491492	3.02611	0.0319714	3.08957	7	128912732	128914063		1					0
ENSG00000148671	ADIRF	adipogenesis regulatory factor #or# ArfGAP with GTPase domain, ankyrin repeat and PH domain 11 /// adipogenesis regulatory factor	3.85726	0.453786	2.90001	0.0421823	3.08749	10	86968192	86983934							1
ENSG00000206181	ELOA2	elongin A2	2.74577	0.324458	3.2436	0.0333045	3.08111	18	47032572	47035621							1
ENSG00000251629	LINC02241	long intergenic non-protein coding RNA 2241	3.83609	0.453786	2.92613	0.0254903	3.07955	5	20611840	20937691			1				0
ENSG00000225868	AC016582.1		4.11283	0.491492	2.97227	0.0320468	3.06489	19	37823722	37855215		1					0
ENSG00000260454	AL355607.2		8.36541	1.00514	3.00744	0.00418111	3.05704	9	90997054	91001871		1					0
ENSG00000230635	CYP4F60P	cytochrome P450 family 4 subfamily F member 60, pseudogene	4.03199	0.491492	2.94529	0.0227919	3.03625	9	42950566	42951630	1						0
ENSG00000205562	AL049775.1		10.5793	1.30744	3.00885	0.000680383	3.01642	14	85524432	85529988		1					0
ENSG00000214929	SPATA31D1	SPATA31 subfamily D member 1	6.49926	0.81595	3.01605	0.00278245	2.99372	9	81988772	81995256							1
ENSG00000205861	PCOTH	Pro-X-Gly collagen triple helix like repeat containing	5.33938	0.68068	2.76908	0.0157759	2.97162	13	23888889	23897263							1
ENSG00000228612	HK2P1	hexokinase 2 pseudogene 1	4.28932	0.551351	3.0644	0.0177541	2.9597	0	80571871	80574607	1						0
ENSG00000166603	MC4R	melanocortin 4 receptor	6.00192	0.778244	2.93005	0.00517769	2.94713	18	60371110	60372775							1
ENSG00000227913	KRT8P44	keratin 8 pseudogene 44	4.48521	0.589057	3.08114	0.0161882	2.9287	6	162568379	162569728	1						0
ENSG00000240457	RN7SL472P	RNA, 7SL, cytoplasmic 472, pseudogene	2.46727	0.324458	3.06721	0.0398698	2.92681	14	102077180	102077472	1						0
ENSG00000198028	ZNF560	zinc finger protein 560	2.45561	0.324458	3.06381	0.0461051	2.91998	19	9466507	9498607							1
ENSG00000204518	AADACL4	arylacetamide deacetylase like 4	3.69596	0.491492	2.82369	0.03824	2.91071	1	12644547	12667086							1
ENSG00000279663	AC104623.2		3.69596	0.491492	2.82219	0.0350611	2.91071	2	16541690	16545695		1					0
ENSG00000230006	ANKRD36BP2	ankyrin repeat domain 36B pseudogene 2	22.7337	3.03691	2.91534	1.9721e-06	2.90416	2	88765807	88806612	1						0
ENSG00000227551	USP17L12	ubiquitin specific peptidase 17-like family member 12	3.39452	0.453786	2.7049	0.0347245	2.90312	4	9220152	9221744							1
ENSG00000283023	FRG1GP	FSHD region gene 1 family member G, pseudogene	3.67302	0.491492	2.82142	0.0440234	2.90173	22	12602466	12626642	1						0
ENSG00000243414	TICAM2	toll like receptor adaptor molecule 2 #or# TMED7-TICAM2 readthrough /// toll like receptor adaptor molecule 2	10.3929	1.40501	2.95376	0.000491953	2.88695	5	115578650	115602479							1
ENSG00000229558	SACS-AS1	SACS antisense RNA 1	3.8802	0.529198	2.84088	0.0361207	2.87425	13	23418971	23428869							1
ENSG00000279391	AC116456.2		3.84561	0.529198	2.83068	0.0318555	2.86133	11	8075573	8077781		1					0
ENSG00000188959	C9orf152	chromosome 9 open reading frame 152	5.88473	0.81595	2.86389	0.00818844	2.85042	9	110190048	110208189							1
ENSG00000223885	FAM90A13P	family with sequence similarity 90 member A13, pseudogene	3.97446	0.551351	2.90786	0.0274652	2.84972	8	7279770	7282780	1						0
ENSG00000277704	AL445675.2		5.17807	0.718386	2.70416	0.00957257	2.84958	1	242890247	242890803		1					0
ENSG00000280294	AC011008.2		3.26781	0.453786	2.68619	0.0467479	2.84824	8	10856085	10859436		1					0
ENSG00000197124	ZNF682	zinc finger protein 682	26.9239	3.74275	2.77745	4.21679e-07	2.84672	19	19997058	20039506							1
ENSG00000261527	AC026464.5		4.63486	0.648916	3.05392	0.0261511	2.83642	16	69443240	69444290		1					0
ENSG00000232684	ATP11A-AS1	ATP11A antisense RNA 1	5.39905	0.756091	2.77663	0.0151813	2.83607	13	112745449	112754693							1
ENSG00000189334	S100A14	S100 calcium binding protein A14	5.81554	0.81595	2.85367	0.00586346	2.83336	1	153614255	153616986							1
ENSG00000124469	CEACAM8	carcinoembryonic antigen related cell adhesion molecule 8	3.76514	0.529198	2.81463	0.0305838	2.83082	19	42580241	42595055							1
ENSG00000215174	NLRP2B	NLR family pyrin domain containing 2B	5.37611	0.756091	2.77139	0.011331	2.82993	0	57677067	57680260							1
ENSG00000275216	AL161431.1		14.8625	2.10784	2.80088	7.10811e-05	2.81784	13	109269634	109273838		1					0
ENSG00000196240	OR2T2	olfactory receptor family 2 subfamily T member 2	3.73055	0.529198	2.80653	0.035038	2.81751	1	248445512	248455725							1
ENSG00000226472	AC008013.1		4.79617	0.68068	2.63206	0.0207306	2.81683	12	30978308	31006010		1					0
ENSG00000259473	LINC02205	long intergenic non-protein coding RNA 2205	5.47951	0.778244	2.78767	0.0196357	2.81575	15	70503907	70505928			1				0
ENSG00000231236	AP001605.1		4.14704	0.589057	2.9241	0.0200911	2.8156	21	27358885	27448579		1					0
ENSG00000145850	TIMD4	T cell immunoglobulin and mucin domain containing 4	3.84775	0.551351	2.8801	0.0296164	2.80297	5	156919282	156963255							1
ENSG00000228314	CYP4F29P	cytochrome P450 family 4 subfamily F member 29, pseudogene	5.00335	0.718386	2.63926	0.0153597	2.80006	21	13843133	13848364	1						0
ENSG00000242299	AC073861.1		3.82267	0.551351	2.82234	0.0316479	2.79354	3	101576489	101576947		1					0
ENSG00000230992	FAM201B	family with sequence similarity 201 member B	3.63843	0.529198	2.7834	0.0446412	2.78144	2	132352722	132353318							1
ENSG00000228111	TPT1P2	tumor protein, translationally-controlled 1 pseudogene 2	4.81911	0.718386	2.617	0.0207365	2.74594	2	208214724	208222625	1						0
ENSG00000206072	SERPINB11	serpin family B member 11 (gene/pseudogene)	5.42198	0.81595	2.75678	0.0135349	2.73227	18	63647579	63726432	1						0
ENSG00000185950	IRS2	insulin receptor substrate 2	63.5704	9.58666	2.76091	9.19395e-16	2.72925	13	109752698	109786568							1
ENSG00000274642	AC244669.2		13.486	2.04798	2.68342	0.000223396	2.71918	1	120197085	120319680		1					0
ENSG00000226516	FAM138B	family with sequence similarity 138 member B	6.61646	1.02069	2.6622	0.00419258	2.69651	2	113577382	113578852							1
ENSG00000267023	LRRC37A16P	leucine rich repeat containing 37 member A16, pseudogene	15.679	2.41976	2.61398	5.70186e-05	2.6959	17	68125777	68152468	1						0
ENSG00000081853	PCDHGA2	protocadherin gamma subfamily A, 2	3.41745	0.529198	2.6733	0.0344214	2.69104	5	141338760	141512979							1
ENSG00000081665	AC011477.4	NA /// zinc finger protein 506 #or# NA /// long intergenic non-protein coding RNA 663 #or# NA	10.4829	1.66366	2.5409	0.00386663	2.6556	19	19785839	19821751							1
ENSG00000282608	ADORA3	adenosine A3 receptor	4.76158	0.756091	2.58384	0.0134631	2.65481	1	111499429	111503760							1
ENSG00000177599	ZNF491	zinc finger protein 491	7.35732	1.17217	2.52325	0.00673478	2.65	19	11797667	11809622							1
ENSG00000162755	KLHDC9	kelch domain containing 9	13.7991	2.1988	2.68553	0.000158207	2.64978	1	161098361	161100346							1
ENSG00000125046	SSUH2	ssu-2 homolog (C. elegans)	22.533	3.60381	2.68367	9.09524e-07	2.64444	3	8619400	8745040							1
ENSG00000183837	PNMA3	PNMA family member 3	8.27115	1.323	2.62069	0.00111198	2.64428	0	153056409	153060467							1
ENSG00000176049	JAKMIP2	janus kinase and microtubule interacting protein 2	43.8411	7.04125	2.66233	1.87143e-12	2.63838	5	147585439	147782848							1
ENSG00000267646	AC008543.5		11.4334	1.85879	2.60825	0.000702934	2.62082	19	11796084	11798598		1					0
ENSG00000189212	DPY19L2P1	DPY19L2 pseudogene 1	16.4177	2.67474	2.63101	1.75723e-05	2.61778	7	35079989	35186041	1						0
ENSG00000112486	CCR6	C-C motif chemokine receptor 6 /// C-C motif chemokine receptor 6 #or# NA	6.99622	1.14041	2.6758	0.00536354	2.61702	6	167111807	167139696							1
ENSG00000166840	GLYATL1	glycine-N-acyltransferase like 1	8.36541	1.3673	2.65002	0.0033541	2.61311	11	58905398	59043527							1
ENSG00000197428	OR51D1	olfactory receptor family 51 subfamily D member 1	4.8537	0.793797	2.58324	0.0112167	2.61224	11	4637477	4643060							1
ENSG00000225093	RPL3P7	ribosomal protein L3 pseudogene 7	4.73864	0.778244	2.58387	0.026107	2.60618	6	108004357	108005568	1						0
ENSG00000260059	AC092620.3		4.36802	0.718386	2.48534	0.0225026	2.60415	2	138599663	138602426		1					0
ENSG00000211955	IGHV3-33	immunoglobulin heavy variable 3-33	3.57876	0.589057	2.68444	0.0412991	2.60298	14	106359793	106360324							1
ENSG00000254235	AC022784.6		4.94796	0.81595	2.65018	0.01085	2.60028	8	9249417	9413714		1					0
ENSG00000250421	AC106798.1		6.27828	1.04284	2.55424	0.0122497	2.58985	5	67699429	67902600		1					0
ENSG00000269220	LINC00528	long intergenic non-protein coding RNA 528	6.24583	1.04284	2.58363	0.0041743	2.58237	22	17777322	17779481			1				0
ENSG00000223443	USP17L2	ubiquitin specific peptidase 17-like family member 2	5.09761	0.853656	2.64695	0.01981	2.57809	8	12137168	12139077							1
ENSG00000130844	ZNF331	zinc finger protein 331	41.04	6.88382	2.5786	6.46469e-10	2.57575	19	53520981	53580269							1
ENSG00000123892	RAB38	RAB38, member RAS oncogene family	4.63486	0.778244	2.56341	0.0409809	2.57423	11	88113242	88175467							1
ENSG00000260206	AC105020.2		8.78015	1.47448	2.47445	0.00434292	2.57404	15	75636139	75639239		1					0
ENSG00000169550	MUC15	mucin 15, cell surface associated	4.26248	0.718386	2.42062	0.0334072	2.56886	11	26559033	26572233							1
ENSG00000272990	AC084036.1		7.53029	1.26974	2.52392	0.0135251	2.56818	3	156523740	156524247		1					0
ENSG00000236013	AL138737.1		3.46371	0.589057	2.66148	0.0396481	2.55584	6	140067435	140093721		1					0
ENSG00000239039	SNORD13	small nucleolar RNA, C/D box 13	12.2919	2.10124	2.52589	7.10861e-05	2.54839	8	33513475	33513578					1		0
ENSG00000231208	ZBTB46-AS1	ZBTB46 antisense RNA 1	8.58639	1.47448	2.47444	0.00537497	2.54185	20	63808076	63816521							1
ENSG00000226789	AC110926.1		4.97089	0.853656	2.62258	0.0225396	2.54178	2	127247258	127250082		1					0
ENSG00000169903	TM4SF4	transmembrane 4 L six family member 4	3.20814	0.551351	2.54642	0.048548	2.54069	3	149473974	149503281							1
ENSG00000219665	ZNF433-AS1	ZNF433 and ZNF878 antisense RNA 1	10.6463	1.83664	2.51077	0.000838114	2.53521	19	11987617	12046275							1
ENSG00000283342	AC241584.2		5.7926	1.00514	2.45975	0.0104102	2.52682	1	147099482	147124285		1					0
ENSG00000251087	ALG1L3P	asparagine-linked glycosylation 1-like 3, pseudogene	4.55226	0.793797	2.48805	0.025764	2.51974	4	9703754	9710812	1						0
ENSG00000229688	ISPD-AS1	ISPD antisense RNA 1	10.844	1.8965	2.53455	0.000702915	2.51548	7	16210488	16270604							1
ENSG00000239544	AL442663.1		4.87663	0.853656	2.57073	0.018145	2.51416	14	72963645	72964008		1					0
ENSG00000204389	HSPA1A	heat shock protein family A (Hsp70) member 1A	63.0925	11.1085	2.49602	1.76149e-15	2.50581	6	31815464	31817946							1
ENSG00000188460	ACTBP11	actin, beta pseudogene 11	5.36445	0.945279	2.37835	0.0167035	2.50462	1	223863726	223864851	1						0
ENSG00000233430	AC239798.1		3.3024	0.589057	2.62107	0.0469352	2.48704	1	143811359	143825837		1					0
ENSG00000177551	NHLH2	nescient helix-loop-helix 2	99.1827	17.7594	2.46067	8.99511e-24	2.4815	1	115836377	115843917							1
ENSG00000221867	MAGEA3	MAGE family member A3	4.21623	0.756091	2.39258	0.0353838	2.47932	0	152698752	152702347							1
ENSG00000226445	BX322234.1		6.32629	1.14041	2.55054	0.0137124	2.47181	6	169213254	169239565		1					0
ENSG00000145824	CXCL14	C-X-C motif chemokine ligand 14	12.3031	2.22096	2.50856	0.000600457	2.46977	5	135570679	135579279							1
ENSG00000237686	AL109615.3		8.70144	1.57204	2.4601	0.000953794	2.46862	6	43995723	44074652		1					0
ENSG00000274553	AC138035.3		4.39095	0.793797	2.4613	0.0154504	2.46769	5	181329049	181331839		1					0
ENSG00000246130	AC107959.2		5.92146	1.08055	2.49043	0.0106575	2.45419	8	23068229	23083619		1					0
ENSG00000225359	AL358393.1		3.54631	0.648916	2.73338	0.028654	2.45021	1	181190471	181191149		1					0
ENSG00000280997	CCAT2	colon cancer associated transcript 2 (non-protein coding)	5.47951	1.00514	2.37962	0.0179243	2.44665	8	127400399	127402150							1
ENSG00000167104	BPIFB6	BPI fold containing family B member 6	5.45657	1.00514	2.37585	0.0169166	2.4406	20	33031648	33044047							1
ENSG00000227942	FRMD8P1	FERM domain containing 8 pseudogene 1	4.42555	0.81595	2.46284	0.0215841	2.4393	0	65550898	65552421	1						0
ENSG00000134438	RAX	retina and anterior neural fold homeobox	7.96972	1.47448	2.33577	0.00595923	2.43433	18	59267035	59274086							1
ENSG00000121742	GJB6	gap junction protein beta 6	3.48664	0.648916	2.6325	0.0468953	2.42573	13	20221962	20232395							1
ENSG00000170629	DPY19L2P2	DPY19L2 pseudogene 2	16.3122	3.04652	2.36392	2.2213e-05	2.42072	7	103175133	103280410	1						0
ENSG00000234736	FAM170B-AS1	FAM170B antisense RNA 1	4.36802	0.81595	2.45293	0.025644	2.42043	10	49121839	49151547							1
ENSG00000196172	ZNF681	zinc finger protein 681	8.41166	1.57204	2.40749	0.00208311	2.41975	19	23739195	23758891							1
ENSG00000248560	AC008620.2		5.45657	1.02069	2.36619	0.0196357	2.41845	5	181114106	181115674		1					0
ENSG00000225234	TRAPPC12-AS1	TRAPPC12 antisense RNA 1	4.13577	0.778244	2.37704	0.0414535	2.40986	2	3481242	3482409							1
ENSG00000176979	TRIM60	tripartite motif containing 60	4.00905	0.756091	2.35327	0.034247	2.40663	4	165031953	165041744							1
ENSG00000248472	DDX11L9	DEAD/H-box helicase 11 like 9	7.90267	1.49663	2.34769	0.00264332	2.40062	15	101976558	101979093							1
ENSG00000279532	AC002094.5		2.90884	0.551351	2.48879	0.0483553	2.3994	17	28373673	28374301		1					0
ENSG00000280025	AL008638.6		4.18164	0.793797	2.36335	0.0247795	2.39723	22	27102766	27107019		1					0
ENSG00000282988	AL031777.3	NA /// histone cluster 1 H3 family member d #or# NA	8.92028	1.70137	2.27959	0.00240387	2.39039	6	26195595	26199293							1
ENSG00000187094	CCK	cholecystokinin	5.35104	1.02069	2.32009	0.0316858	2.39027	3	42257825	42266207							1
ENSG00000147570	DNAJC5B	DnaJ heat shock protein family (Hsp40) member C5 beta	4.04365	0.778244	2.35781	0.0396995	2.37736	8	66021560	66100526							1
ENSG00000224478	AL356417.1		3.71889	0.718386	2.25261	0.0492373	2.37204	6	159094093	159116254		1					0
ENSG00000248893	FAM138E	family with sequence similarity 138 member E	4.41427	0.853656	2.44917	0.0225364	2.37045	15	101954885	101956412							1
ENSG00000279289	AL136164.3		9.48856	1.83664	2.35218	0.00151337	2.36912	6	71386852	71390829		1					0
ENSG00000170468	RIOX1	ribosomal oxygenase 1	13.4725	2.61489	2.33838	0.000597764	2.3652	14	73490964	73493392							1
ENSG00000233303	XXYLT1-AS1	XXYLT1 antisense RNA 1	5.55997	1.08055	2.36322	0.0334874	2.36331	3	195094588	195096057							1
ENSG00000238287	AL603839.3		6.91575	1.34515	2.36083	0.0129503	2.36212	1	40493157	40508661		1					0
ENSG00000229373	LINC00452	long intergenic non-protein coding RNA 452	5.35318	1.04284	2.34909	0.0278686	2.35987	13	113888306	113923512			1				0
ENSG00000228623	ZNF883	zinc finger protein 883 /// zinc finger protein 883 #or# zinc finger protein 883	6.89282	1.34515	2.35747	0.00540601	2.35733	9	112957722	113012227							1
ENSG00000244476	ERVFRD-1	endogenous retrovirus group FRD member 1, envelope	3.84561	0.756091	2.26068	0.0473597	2.34658	6	11102489	11111732							1
ENSG00000152578	GRIA4	glutamate ionotropic receptor AMPA type subunit 4	22.8499	4.49583	2.35531	9.58098e-07	2.34553	11	105609994	105982092							1
ENSG00000180257	ZNF816	zinc finger protein 816	6.33795	1.24758	2.28109	0.00866045	2.34488	19	52949379	52962911							1
ENSG00000257884	AL512310.7		3.82267	0.756091	2.25137	0.0389044	2.33795	14	19677837	19680104		1					0
ENSG00000175164	ABO	ABO, alpha 1-3-N-acetylgalactosaminyltransferase and alpha 1-3-galactosyltransferase	12.858	2.54542	2.38932	0.000200504	2.33669	9	133250401	133275219							1
ENSG00000198542	ITGBL1	integrin subunit beta like 1	7.63407	1.51218	2.27165	0.0134264	2.33582	13	101452593	101720856							1
ENSG00000223729	LINC02247	long intergenic non-protein coding RNA 2247	4.94582	0.982985	2.23357	0.0473555	2.33097	9	134293931	134295397			1				0
ENSG00000283638	AC002407.1	NA #or# microRNA 106a /// NA #or# microRNA 18b /// NA /// NA #or# microRNA 92a-2 /// NA #or# microRNA 363 /// NA #or# microRNA 20b /// NA #or# microRNA 20b #or# microRNA 19b-2 /// NA #or# microRNA 19b-2	8.7339	1.73908	2.23233	0.00376881	2.3283	0	134168911	134174089							1
ENSG00000135346	CGA	glycoprotein hormones, alpha polypeptide	9.60576	1.91865	2.37457	0.00128695	2.32381	6	87085498	87095406							1
ENSG00000156009	MAGEA8	MAGE family member A8	5.10927	1.02069	2.26976	0.0171805	2.32357	0	149881141	149885835							1
ENSG00000224682	SOCS5P2	suppressor of cytokine signaling 5 pseudogene 2	4.06658	0.81595	2.34431	0.0326004	2.31726	9	135447446	135450154	1						0
ENSG00000267284	AC022031.2		11.5969	2.32813	2.27986	0.000512778	2.31649	18	55721063	55788761		1					0
ENSG00000253634	AC091096.2		4.5406	0.913515	2.44619	0.024424	2.31338	8	92565443	92655494		1					0
ENSG00000235911	AC019055.1		4.87663	0.982985	2.21544	0.0437147	2.31064	2	19711715	19717576		1					0
ENSG00000249894	AC024581.1		5.56035	1.14041	2.3466	0.0189824	2.28563	5	67800740	67890096		1					0
ENSG00000213096	ZNF254	zinc finger protein 254	22.1394	4.54909	2.28529	1.00303e-05	2.28297	19	24033405	24129961							1
ENSG00000260172	LINC01413	long intergenic non-protein coding RNA 1413	5.2494	1.08055	2.31055	0.0337896	2.28039	15	57319138	57323908			1				0
ENSG00000235711	ANKRD34C	ankyrin repeat domain 34C	3.67302	0.756091	2.22696	0.0420035	2.28034	15	79293285	79298235							1
ENSG00000128610	FEZF1	FEZ family zinc finger 1	5.41032	1.14041	2.31877	0.0235299	2.24616	7	122301394	122310691							1
ENSG00000170983	LINC00208	long intergenic non-protein coding RNA 208	4.04365	0.853656	2.32027	0.0422186	2.24393	8	11576313	11581342			1				0
ENSG00000237435	AC099566.1		4.93416	1.04284	2.19019	0.0248398	2.24228	1	95937901	96022880		1					0
ENSG00000198914	POU3F3	POU class 3 homeobox 3	18.6912	3.96003	2.24649	9.03853e-05	2.23878	2	104855511	104858574							1
ENSG00000120708	TGFBI	transforming growth factor beta induced	13.2555	2.81963	2.2052	0.000209488	2.23301	5	136028895	136063818							1
ENSG00000255958	AC115676.1		5.07467	1.08055	2.24884	0.0290226	2.23155	12	10214161	10214761		1					0
ENSG00000164185	ZNF474	zinc finger protein 474 #or# NA /// zinc finger protein 474	9.63859	2.05392	2.3209	0.00347202	2.23044	5	122129513	122153571							1
ENSG00000213777	AC011487.1		6.69692	1.43677	2.12779	0.024232	2.22067	19	53503392	53512687		1					0
ENSG00000254440	PBOV1	prostate and breast cancer overexpressed 1	3.78808	0.81595	2.22873	0.0431748	2.21491	6	138215986	138218491							1
ENSG00000163424	C3orf30	chromosome 3 open reading frame 30 /// chromosome 3 open reading frame 30 #or# NA	4.83076	1.04284	2.18104	0.0343168	2.21173	3	119146150	119160042							1
ENSG00000233607	LINC01392	long intergenic non-protein coding RNA 1392	7.38064	1.59419	2.21955	0.00614036	2.21092	7	115061537	115231355			1				0
ENSG00000151790	TDO2	tryptophan 2,3-dioxygenase	11.2262	2.4257	2.22305	0.000295324	2.2104	4	155854738	155920406							1
ENSG00000231417	IRX1P1	iroquois homeobox 1 pseudogene 1	4.81911	1.04284	2.1807	0.0445537	2.20824	13	24742677	24746184	1						0
ENSG00000215808	LINC01139	long intergenic non-protein coding RNA 1139	3.48664	0.756091	2.11015	0.047877	2.20521	1	238480384	238486023			1				0
ENSG00000234429	AC105342.1		7.21719	1.57204	2.16922	0.00549058	2.1988	2	81194337	81201184		1					0
ENSG00000249482	USP17L14P	ubiquitin specific peptidase 17-like family member 14, pseudogene	4.66946	1.02069	2.15549	0.0268639	2.19371	4	9229641	9231233	1						0
ENSG00000101846	STS	steroid sulfatase	4.92288	1.08055	2.17827	0.0250872	2.18774	0	7219456	7354810							1
ENSG00000184984	CHRM5	cholinergic receptor muscarinic 5	9.5115	2.09163	2.30648	0.00216826	2.18505	15	33968720	34067457							1
ENSG00000167332	OR51E2	olfactory receptor family 51 subfamily E member 2	3.70762	0.81595	2.21564	0.0465317	2.18394	11	4680171	4697854							1
ENSG00000146453	PNLDC1	PARN like, ribonuclease domain containing 1	13.4747	2.97111	2.10882	0.000434985	2.18118	6	159800249	159820704							1
ENSG00000169255	B3GALNT1	beta-1,3-N-acetylgalactosaminyltransferase 1 (globoside blood group)	12.6876	2.80407	2.14434	0.000798607	2.17782	3	161083883	161105384							1
ENSG00000166863	TAC3	tachykinin 3 #or# myosin IA /// tachykinin 3	4.08952	0.907573	1.97855	0.0427721	2.17184	12	57010000	57028883							1
ENSG00000150756	FAM173B	family with sequence similarity 173 member B	8.57473	1.91865	2.21253	0.00361417	2.16	5	10226330	10249897							1
ENSG00000258661	AL079303.1		6.74103	1.51218	2.07636	0.0220977	2.15634	14	36647083	36658801		1					0
ENSG00000234805	AC090505.1		3.90313	0.875809	2.22971	0.0443736	2.15594	3	194755589	194757422		1					0
ENSG00000226965	AC092167.1		6.25535	1.40501	2.19605	0.0190636	2.15451	7	110432239	110534754		1					0
ENSG00000106331	PAX4	paired box 4	9.61528	2.1611	2.16075	0.00198249	2.15356	7	127610292	127618114							1
ENSG00000165509	MAGEC3	MAGE family member C3	4.70405	1.0584	2.14877	0.0270681	2.15202	0	141838316	141897832							1
ENSG00000216809	AL589993.1		7.82007	1.76123	2.09174	0.00954912	2.1506	6	118452469	118454992		1					0
ENSG00000181195	PENK	proenkephalin	4.49473	1.02069	2.07905	0.0461761	2.13869	8	56436674	56446734							1
ENSG00000232862	AL138787.1		4.55226	1.04284	2.08107	0.0370512	2.12606	1	36080066	36084026		1					0
ENSG00000112333	NR2E1	nuclear receptor subfamily 2 group E member 1	23.8788	5.47222	2.10817	1.9815e-05	2.12554	6	108166058	108188809							1
ENSG00000184478	OR56A3	olfactory receptor family 56 subfamily A member 3	5.67541	1.30744	2.0674	0.0224579	2.11798	11	5938751	5951347							1
ENSG00000081386	ZNF510	zinc finger protein 510	12.3974	2.85733	2.09747	0.00143798	2.1173	9	96755865	96778129							1
ENSG00000259315	ACTG1P17	actin gamma 1 pseudogene 17	4.51981	1.04284	2.13088	0.0315562	2.11574	15	82725873	82738904	1						0
ENSG00000124557	BTN1A1	butyrophilin subfamily 1 member A1	6.62597	1.53434	2.05763	0.0228837	2.11052	6	26501221	26510422							1
ENSG00000164106	SCRG1	stimulator of chondrogenesis 1	17.7117	4.10491	2.05645	0.000156572	2.10928	4	173384701	173406380							1
ENSG00000104689	TNFRSF10A	TNF receptor superfamily member 10a	4.21623	0.982985	1.98321	0.0495275	2.10071	8	23190452	23225126							1
ENSG00000130600	H19	H19, imprinted maternally expressed transcript (non-protein coding) /// H19, imprinted maternally expressed transcript (non-protein coding) #or# microRNA 675	4.88829	1.14041	2.15266	0.0454036	2.09978	11	1995176	2001470							1
ENSG00000273443	AL645608.9		5.99026	1.39907	1.97938	0.0319999	2.09816	1	1062208	1063288		1					0
ENSG00000168830	HTR1E	5-hydroxytryptamine receptor 1E	9.53481	2.23057	2.01371	0.00318065	2.09579	6	86937306	87016683							1
ENSG00000174130	TLR6	toll like receptor 6	5.90766	1.38285	2.11495	0.0253539	2.09494	4	38823715	38856817							1
ENSG00000105366	SIGLEC8	sialic acid binding Ig like lectin 8	4.44848	1.04284	2.06381	0.0412892	2.09279	19	51450847	51458456							1
ENSG00000171722	SPATA46	spermatogenesis associated 46	5.57163	1.30744	2.05278	0.0242518	2.09135	1	162373203	162376870							1
ENSG00000234546	LINC01759	long intergenic non-protein coding RNA 1759	7.86632	1.85879	2.07472	0.0065004	2.08132	1	9182004	9196284			1				0
ENSG00000164458	TBXT	T-box transcription factor T	12.0134	2.84772	2.14126	0.000733672	2.07676	6	166157656	166168700							1
ENSG00000278039	RF01880		8.97781	2.14555	2.06291	0.00364255	2.06502	0	73850487	73850571		1					0
ENSG00000228549	BX284668.2	NA /// NA #or# RNA, U1 small nuclear 5, pseudogene	64.7172	15.5289	2.0495	3.78071e-13	2.0592	1	16870945	16874092	1						0
ENSG00000227555	MIR4290HG	MIR4290 host gene	4.34508	1.04284	2.04913	0.0410583	2.05886	9	90020654	90041499				1			0
ENSG00000250745	USP17L20	ubiquitin specific peptidase 17-like family member 20	4.22789	1.02069	1.96612	0.0406357	2.05039	4	9258124	9260075							1
ENSG00000174667	OR7D4	olfactory receptor family 7 subfamily D member 4	5.13434	1.24758	2.00915	0.0339092	2.04104	19	9210276	9219589							1
ENSG00000227105	PARP1P1	poly(ADP-ribose) polymerase 1 pseudogene 1	5.21266	1.26974	1.97237	0.0354972	2.03749	13	110936759	110939784	1						0
ENSG00000188641	MIR137HG	dihydropyrimidine dehydrogenase #or# MIR137 host gene /// MIR137 host gene /// MIR137 host gene #or# microRNA 137 /// MIR137 host gene #or# microRNA 2682	16.9843	4.14922	2.00254	4.57602e-05	2.03329	1	97077743	97995000				1			0
ENSG00000236673	AL117378.1		5.35104	1.30744	1.97579	0.0269765	2.03307	6	131901963	131920565		1					0
ENSG00000104055	TGM5	transglutaminase 5	8.23656	2.02583	1.96183	0.00818031	2.02353	15	43232595	43266857							1
ENSG00000133878	DUSP26	dual specificity phosphatase 26	9.38302	2.31258	1.96677	0.0040471	2.02055	8	33591332	33600106							1
ENSG00000187650	VMAC	vimentin type intermediate filament associated coiled-coil protein	6.37041	1.57204	1.97795	0.0283391	2.01875	19	5904858	5910853							1
ENSG00000248118	LINC01019	long intergenic non-protein coding RNA 1019	4.13577	1.02069	1.95403	0.0432399	2.01861	5	3417152	3536094			1				0
ENSG00000182183	SHISAL2A	shisa like 2A	6.88116	1.70137	1.9165	0.0232291	2.01595	1	52633344	52669683							1
ENSG00000167968	DNASE1L2	deoxyribonuclease 1 like 2	34.3391	8.53788	2.01043	4.05872e-08	2.0079	16	2235816	2238711							1
ENSG00000260460	AL365181.1		5.01501	1.24758	1.88253	0.0307718	2.00711	1	156509854	156511681		1					0
ENSG00000147437	GNRH1	gonadotropin releasing hormone 1	12.3953	3.10638	1.95721	0.00142166	1.99648	8	25419260	25424654							1
ENSG00000275945	EIF3FP1	eukaryotic translation initiation factor 3 subunit F pseudogene 1	4.91337	1.23203	1.93918	0.0316926	1.99567	21	10330732	10331537	1						0
ENSG00000258846	EEF1A1P33	eukaryotic translation elongation factor 1 alpha 1 pseudogene 33	5.21266	1.30744	1.96063	0.0388159	1.99527	12	96900697	96902698	1						0
ENSG00000260193	AL138781.1		33.9642	8.55937	2.01171	2.85808e-07	1.98844	9	136107808	136109424		1					0
ENSG00000165643	SOHLH1	spermatogenesis and oogenesis specific basic helix-loop-helix 1	7.69335	1.95636	2.03876	0.00766522	1.97544	9	135693407	135699528							1
ENSG00000174951	FUT1	fucosyltransferase 1 (H blood group)	13.4725	3.44639	1.94673	0.000411727	1.96686	19	48748011	48755390							1
ENSG00000175003	SLC22A1	solute carrier family 22 member 1	5.9098	1.51218	1.92833	0.0202807	1.96648	6	160121789	160158718							1
ENSG00000185433	LINC00158	long intergenic non-protein coding RNA 158	7.40143	1.8965	1.95688	0.0126091	1.96447	21	25385820	25431701			1				0
ENSG00000176887	SOX11	SRY-box 11 /// SRY-box 11 #or# NA	38.1039	9.77292	1.92629	4.81354e-08	1.96308	2	5692667	5701385							1
ENSG00000283039	KLF18	Kruppel like factor 18	6.12864	1.57204	1.94208	0.018346	1.96293	1	44137821	44141631							1
ENSG00000154438	ASZ1	ankyrin repeat, SAM and basic leucine zipper domain containing 1	8.56345	2.1988	2.01643	0.00496464	1.96147	7	117363222	117428123							1
ENSG00000284428	AC092329.4		7.61075	1.95636	1.99989	0.00867347	1.95987	19	23259906	23274251		1					0
ENSG00000197165	SULT1A2	sulfotransferase family 1A member 2	6.6048	1.70137	1.87644	0.0169645	1.95682	16	28591943	28597109							1
ENSG00000249378	LINC01060	long intergenic non-protein coding RNA 1060	6.31502	1.6319	1.99	0.0193452	1.95223	4	188400736	188681051			1				0
ENSG00000255099	AC023245.2		5.43364	1.40501	2.00758	0.0307867	1.95134	8	109777912	109782288		1					0
ENSG00000163898	LIPH	lipase H	10.8327	2.80407	1.90488	0.00197024	1.9498	3	185506262	185552613							1
ENSG00000204482	LST1	leukocyte specific transcript 1	4.39095	1.14041	2.0283	0.0360726	1.94498	6	31586124	31588909							1
ENSG00000269153	LYPLA2P2	lysophospholipase II pseudogene 2	7.29979	1.8965	1.97516	0.0151037	1.94452	19	7879445	7880120	1						0
ENSG00000278057	TEX28	testis expressed 28	5.75801	1.49663	1.88398	0.0420574	1.94385	0	154271265	154295853							1
ENSG00000167232	ZNF91	zinc finger protein 91	18.6069	4.858	1.95503	9.37452e-05	1.9374	19	23304991	23395560							1
ENSG00000138435	CHRNA1	cholinergic receptor nicotinic alpha 1 subunit	9.9859	2.61489	1.90496	0.00451902	1.93314	2	174747592	174787935							1
ENSG00000138813	C4orf17	chromosome 4 open reading frame 17	5.18973	1.36136	1.74527	0.0455752	1.93061	4	99511004	99542303							1
ENSG00000171658	NMRAL2P	NmrA like redox sensor 2, pseudogene	9.55775	2.51732	1.86313	0.00632619	1.92478	3	185959943	185980872	1						0
ENSG00000002587	HS3ST1	heparan sulfate-glucosamine 3-sulfotransferase 1	32.6011	8.60075	1.89975	5.42607e-07	1.92239	4	11393150	11429765							1
ENSG00000188868	ZNF563	zinc finger protein 563	13.5548	3.58232	1.88511	0.00261983	1.91983	19	12317477	12333720							1
ENSG00000184363	PKP3	plakophilin 3	25.1361	6.64505	1.82397	1.9895e-05	1.91941	11	392614	404908							1
ENSG00000155918	RAET1L	retinoic acid early transcript 1L	7.91219	2.10124	1.8894	0.0175899	1.91284	6	150018334	150025532							1
ENSG00000166510	CCDC68	coiled-coil domain containing 68	7.05588	1.87435	1.92585	0.00777872	1.91244	18	54901509	54959508							1
ENSG00000236682	AC068282.1		16.1625	4.30664	1.92574	0.000231073	1.90802	2	127389130	127400580		1					0
ENSG00000102043	MTMR8	myotubularin related protein 8	8.1561	2.18325	1.9299	0.00548889	1.9014	0	64268081	64395431							1
ENSG00000244198	AC004889.1		4.65818	1.24758	1.84285	0.0379389	1.90063	7	144194858	144280547		1					0
ENSG00000204390	HSPA1L	heat shock protein family A (Hsp70) member 1 like	9.74413	2.61489	1.88651	0.00615302	1.89779	6	31809619	31815065							1
ENSG00000217455	AC073316.1		6.16323	1.65405	1.93059	0.0315162	1.89768	7	3140234	3174654		1					0
ENSG00000153294	ADGRF4	adhesion G protein-coupled receptor F4	5.21266	1.40501	1.93383	0.0265703	1.89144	6	47685864	47722021							1
ENSG00000135312	HTR1B	5-hydroxytryptamine receptor 1B	7.17132	1.93421	1.92262	0.0190473	1.8905	6	77461753	77463773							1
ENSG00000260271	AL132996.1		6.03651	1.6319	1.91613	0.0318198	1.88716	6	90345219	90362632		1					0
ENSG00000126259	KIRREL2	kirre like nephrin family adhesion molecule 2	10.2436	2.78192	1.84611	0.00424301	1.88057	19	35855861	35867109							1
ENSG00000147160	AWAT2	acyl-CoA wax alcohol acyltransferase 2	6.97328	1.8965	1.87754	0.017408	1.8785	0	70040542	70049938							1
ENSG00000175197	AC022506.1	DNA damage inducible transcript 3 #or# NA	5.99978	1.6319	1.86787	0.0160687	1.87836	12	57516588	57521737							1
ENSG00000284748	AL513220.1		7.77206	2.11745	1.71076	0.015172	1.87597	1	37596126	37607336		1					0
ENSG00000119401	TRIM32	tripartite motif containing 32	17.7459	4.83584	1.86598	0.000106176	1.87565	9	116687302	116701300							1
ENSG00000185974	GRK1	G protein-coupled receptor kinase 1	16.1375	4.40421	1.9012	0.000281709	1.87346	13	113667155	113737735							1
ENSG00000187268	FAM9C	family with sequence similarity 9 member C	4.91123	1.34515	1.85093	0.0358808	1.86832	0	13035618	13044682							1
ENSG00000126226	PCID2	PCI domain containing 2	42.2651	11.6502	1.8806	6.3214e-09	1.85911	13	113177539	113208715							1
ENSG00000196205	EEF1A1P5	eukaryotic translation elongation factor 1 alpha 1 pseudogene 5	5.70048	1.57204	1.84912	0.0313022	1.85844	9	133019486	133020874	1						0
ENSG00000198113	TOR4A	torsin family 4 member A	17.447	4.82029	1.85833	0.000239267	1.85579	9	137277749	137282641							1
ENSG00000235563	AL445183.2		7.27472	2.01622	1.91674	0.0203297	1.85124	1	53114576	53118609		1					0
ENSG00000232399	USP17L13	ubiquitin specific peptidase 17-like family member 13	6.00192	1.66366	1.75258	0.0443511	1.85106	4	9224896	9226847							1
ENSG00000253706	AC011632.1		5.87521	1.6319	1.89032	0.0403116	1.84809	8	74798784	74866939		1					0
ENSG00000225706	PTPRD-AS1	PTPRD antisense RNA 1	7.14801	1.98812	1.77247	0.0200626	1.84613	9	8858130	8862255							1
ENSG00000198346	ZNF813	zinc finger protein 813 /// zinc finger protein 813 #or# NA	7.72795	2.15516	1.74239	0.0197889	1.84229	19	53467735	53496255							1
ENSG00000271820	AL109910.2		5.8272	1.62596	1.69663	0.0438221	1.84151	6	170266669	170276762		1					0
ENSG00000138792	ENPEP	glutamyl aminopeptidase	16.7749	4.70057	1.81018	0.000351209	1.8354	4	110365733	110565285							1
ENSG00000234199	LINC01191	long intergenic non-protein coding RNA 1191	5.68883	1.59419	1.84361	0.0366727	1.8353	2	113979569	114007302			1				0
ENSG00000234229	LINC01505	long intergenic non-protein coding RNA 1505 /// long intergenic non-protein coding RNA 1505 #or# long intergenic non-protein coding RNA 1505	12.1284	3.40868	1.79517	0.00122487	1.83111	9	106664754	106702662			1				0
ENSG00000198131	ZNF544	zinc finger protein 544 #or# NA /// zinc finger protein 544	11.7695	3.31112	1.76743	0.00279903	1.82966	19	58228594	58277495							1
ENSG00000227159	DDX11L16	DEAD/H-box helicase 11 like 16	7.19426	2.02583	1.76527	0.0146692	1.82833	0	156025664	156027877							1
ENSG00000167780	SOAT2	sterol O-acyltransferase 2	5.15514	1.45892	1.70982	0.040266	1.82111	12	53103518	53124538							1
ENSG00000153294	ADGRF2	adhesion G protein-coupled receptor F2 /// adhesion G protein-coupled receptor F4 #or# adhesion G protein-coupled receptor F2	7.87759	2.23651	1.86219	0.00722971	1.81651	6	47685864	47722021							1
ENSG00000131080	EDA2R	ectodysplasin A2 receptor	10.1836	2.90164	1.80278	0.00652296	1.8113	0	66595637	66639298							1
ENSG00000146477	SLC22A3	solute carrier family 22 member 3	11.6657	3.33327	1.76433	0.00535144	1.80726	6	160348268	160452581							1
ENSG00000235955	CICP20	capicua transcriptional repressor pseudogene 20	5.36445	1.53434	1.76945	0.0268955	1.80582	7	45816216	45819016	1						0
ENSG00000061492	WNT8A	Wnt family member 8A	8.64178	2.47961	1.7196	0.0157043	1.80121	5	138083892	138092365							1
ENSG00000175820	CCDC168	coiled-coil domain containing 168	20.5998	5.92893	1.86058	6.9857e-05	1.79678	13	102729369	102759070							1
ENSG00000104894	CD37	CD37 molecule	36.6295	10.5571	1.77482	3.85054e-07	1.79479	19	49335171	49343335							1
ENSG00000129151	BBOX1	gamma-butyrobetaine hydroxylase 1	5.52362	1.59419	1.73381	0.0449903	1.79279	11	27040725	27127809							1
ENSG00000137860	SLC28A2	solute carrier family 28 member 2	6.84657	1.97851	1.85124	0.0176893	1.79097	15	45252230	45277845							1
ENSG00000091010	POU4F3	POU class 4 homeobox 3 /// POU class 4 homeobox 3 #or# NA	8.63226	2.49517	1.73324	0.00701525	1.7906	5	146338839	146341722							1
ENSG00000132010	ZNF625-ZNF20	zinc finger protein 20 #or# ZNF625-ZNF20 readthrough (NMD candidate)	7.86632	2.27487	1.74226	0.0280155	1.7899	19	12092843	12140407							1
ENSG00000271824	SMIM32	small integral membrane protein 32	11.109	3.21355	1.70844	0.010188	1.78949	5	136191468	136193134							1
ENSG00000236253	SLC25A3P1	solute carrier family 25 member 3 pseudogene 1	6.60266	1.91865	1.79805	0.0367777	1.78295	1	53413149	53440020	1						0
ENSG00000215861	AC245297.1		14.2385	4.13961	1.81696	0.00189873	1.78223	1	149197992	149321732		1					0
ENSG00000112562	SMOC2	SPARC related modular calcium binding 2	15.2924	4.45153	1.76062	0.000653194	1.78045	6	168441151	168673445							1
ENSG00000145626	UGT3A1	UDP glycosyltransferase family 3 member A1	13.8107	4.02583	1.86474	0.000731628	1.77843	5	35951010	36001028							1
ENSG00000163219	ARHGAP25	Rho GTPase activating protein 25	12.4087	3.62597	1.83438	0.00113283	1.77491	2	68679601	68826833							1
ENSG00000284839	AC018637.1		7.10427	2.08569	1.78209	0.0224984	1.76816	7	32427901	32431804		1					0
ENSG00000127533	F2RL3	F2R like thrombin or trypsin receptor 3	7.79713	2.29043	1.71718	0.0114798	1.76733	19	16888860	16892606							1
ENSG00000196126	HLA-DRB1	major histocompatibility complex, class II, DR beta 1	6.09404	1.79893	1.72222	0.0255591	1.76026	6	32578769	32589848							1
ENSG00000271776	AL445209.1		12.3473	3.65179	1.64334	0.00479911	1.75752	13	78596129	78599619		1					0
ENSG00000247193	AC104078.1		6.07111	1.79893	1.72049	0.0253882	1.75482	4	36244116	36274220		1					0
ENSG00000254132	MTND6P3	mitochondrially encoded NADH:ubiquinone oxidoreductase core subunit 6 pseudogene 3	112.815	33.4642	1.75433	1.44992e-05	1.75327	5	94568929	94569470	1						0
ENSG00000214145	LINC00887	long intergenic non-protein coding RNA 887	11.8404	3.51285	1.77196	0.00290302	1.753	3	194296465	194312803			1				0
ENSG00000164761	TNFRSF11B	TNF receptor superfamily member 11b	6.94083	2.06353	1.73589	0.0137934	1.74999	8	118923557	118952200							1
ENSG00000159915	ZNF233	zinc finger protein 233	10.9711	3.2638	1.76535	0.00507268	1.74908	19	44259880	44275317							1
ENSG00000159885	ZNF222	zinc finger protein 222 #or# NA /// zinc finger protein 222	5.28399	1.57204	1.75341	0.035886	1.74899	19	44025342	44033112							1
ENSG00000233421	LINC01783	long intergenic non-protein coding RNA 1783	84.3985	25.1311	1.7505	9.06564e-15	1.74774	1	16533886	16536172			1				0
ENSG00000251340	MTCYBP35	mitochondrially encoded cytochrome b pseudogene 35	11.8754	3.53801	1.69502	0.00458269	1.74696	5	94569540	94570676	1						0
ENSG00000136869	TLR4	toll like receptor 4	12.743	3.80261	1.67673	0.00160543	1.74464	9	117704175	117724730							1
ENSG00000183791	ELOA3	elongin A3	5.71214	1.70731	1.81508	0.036704	1.7423	18	47028202	47030078							1
ENSG00000267254	AC020928.1		8.8165	2.63704	1.73399	0.0150842	1.74129	19	36797518	36828115		1					0
ENSG00000109132	PHOX2B	paired like homeobox 2b	5.12054	1.53434	1.68729	0.0402298	1.73868	4	41744082	41748970							1
ENSG00000144681	STAC	SH3 and cysteine rich domain	9.60362	2.87948	1.70958	0.00593471	1.73777	3	36380344	36548007							1
ENSG00000172716	SLFN11	schlafen family member 11	11.3759	3.41528	1.71519	0.00564817	1.7359	17	35350305	35373701							1
ENSG00000163283	ALPP	alkaline phosphatase, placental	11.042	3.31772	1.70208	0.00336337	1.73474	2	232378534	232382889							1
ENSG00000197261	C6orf141	chromosome 6 open reading frame 141	33.223	9.9902	1.70881	2.48868e-06	1.7336	6	49550646	49561907							1
ENSG00000164488	DACT2	dishevelled binding antagonist of beta catenin 2	13.4626	4.05166	1.68706	0.00258593	1.73238	6	168292830	168319754							1
ENSG00000226125	LINC01907	long intergenic non-protein coding RNA 1907	13.5989	4.1019	1.73877	0.00185045	1.72912	2	230690921	230700529			1				0
ENSG00000101850	GPR143	G protein-coupled receptor 143	6.15157	1.85879	1.71978	0.0371719	1.72659	0	9725346	9786297							1
ENSG00000267327	AC009271.1		12.3953	3.74568	1.79765	0.002356	1.72649	18	55893038	56023522		1					0
ENSG00000177575	CD163	CD163 molecule /// CD163 molecule #or# CD163 molecule like 1	8.89734	2.6903	1.7295	0.00893497	1.72561	12	7470813	7503893							1
ENSG00000093134	VNN3	vanin 3	6.36089	1.92826	1.62423	0.0313549	1.72193	6	132722787	132734765							1
ENSG00000270921	CICP23	capicua transcriptional repressor pseudogene 23	5.18021	1.57204	1.736	0.0488862	1.72037	11	123312	126123	1						0
ENSG00000251170	AC004052.1		5.17807	1.57204	1.68374	0.0360139	1.71978	4	104230380	104411035		1					0
ENSG00000162711	NLRP3	NLR family pyrin domain containing 3	5.83886	1.77678	1.65619	0.0425416	1.71642	1	247416156	247449108							1
ENSG00000217950	NOC2LP2	NOC2 like nucleolar associated transcriptional repressor pseudogene 2	4.61193	1.40501	1.79861	0.0471299	1.71479	2	131442644	131444587	1						0
ENSG00000122986	HVCN1	hydrogen voltage gated channel 1	7.31145	2.23057	1.6515	0.0214745	1.71275	12	110627841	110704950							1
ENSG00000041982	TNC	tenascin C	31.0134	9.51426	1.69364	2.12214e-06	1.70473	9	115019578	115118257							1
ENSG00000273796	BX322562.1		6.39548	1.96597	1.62395	0.0374463	1.70181	21	45403809	45404369		1					0
ENSG00000233695	GAS6-AS1	GAS6 antisense RNA 1	23.4948	7.22383	1.70372	9.3563e-05	1.7015	13	113815630	113845744							1
ENSG00000229618	AC011287.1		5.30479	1.6319	1.68959	0.038245	1.70074	7	12726152	13751920		1					0
ENSG00000222009	BTBD19	BTB domain containing 19	33.2004	10.2237	1.67572	6.31091e-06	1.69929	1	44808482	44815585							1
ENSG00000279774	AL590483.3		7.26306	2.25272	1.60697	0.0238379	1.68891	1	244064330	244067909		1					0
ENSG00000180644	PRF1	perforin 1	7.15966	2.22096	1.73024	0.019107	1.68871	10	70597348	70602775							1
ENSG00000259252	AC026583.1		23.7962	7.42857	1.67382	2.83177e-05	1.67958	15	70195638	70198509		1					0
ENSG00000250378	AC114296.1		5.15514	1.60975	1.67522	0.0440732	1.67918	5	135812667	135827546		1					0
ENSG00000238755	LINC02006	long intergenic non-protein coding RNA 2006	5.75801	1.79893	1.63921	0.0322903	1.67843	3	153384934	153980186			1				0
ENSG00000259002	AL445363.1		17.4237	5.44705	1.69724	0.000277219	1.6775	14	34541740	34546329		1					0
ENSG00000019549	SNAI2	snail family transcriptional repressor 2	40.7952	12.7883	1.61833	1.94817e-06	1.67357	8	48917604	48921740							1
ENSG00000130396	AFDN	afadin, adherens junction formation factor	94.4815	29.6426	1.64995	1.90631e-15	1.67236	6	167826922	167972023							1
ENSG00000263482	ANTXRLP1	anthrax toxin receptor-like pseudogene 1	6.56806	2.06353	1.61778	0.0268614	1.67035	10	46233885	46273557	1						0
ENSG00000183638	RP1L1	RP1 like 1	13.822	4.34435	1.69744	0.000842817	1.66975	8	10606349	10712187							1
ENSG00000248740	LINC02428	long intergenic non-protein coding RNA 2428	6.74317	2.12339	1.66905	0.0440266	1.66706	4	103256159	103453658			1				0
ENSG00000259485	LINC02253	long intergenic non-protein coding RNA 2253	23.9441	7.54235	1.62736	6.00355e-05	1.66659	15	97295881	97432094			1				0
ENSG00000257943	AC084879.1		5.88473	1.85879	1.64583	0.0401895	1.66261	12	95311312	95442482		1					0
ENSG00000083454	P2RX5	purinergic receptor P2X 5	7.43603	2.35029	1.61054	0.0247845	1.6617	17	3672199	3696404							1
ENSG00000074771	NOX3	NADPH oxidase 3	4.97089	1.57204	1.66197	0.0482549	1.66087	6	155395370	155455903							1
ENSG00000184584	TMEM173	transmembrane protein 173	33.5637	10.6295	1.68366	2.49475e-06	1.65883	5	139475534	139482935							1
ENSG00000170775	GPR37	G protein-coupled receptor 37	15.4905	4.91191	1.63428	0.00103129	1.65703	7	124745997	124765627							1
ENSG00000188001	TPRG1	tumor protein p63 regulated 1	13.348	4.23718	1.73052	0.00153833	1.65545	3	188947214	189325304							1
ENSG00000226386	PARD3-AS1	PARD3 antisense RNA 1	11.8771	3.77085	1.68189	0.00550727	1.65523	10	34815767	34816386							1
ENSG00000196754	S100A2	S100 calcium binding protein A2	20.5634	6.53721	1.62989	0.000288743	1.65333	1	153561108	153567890							1
ENSG00000183087	GAS6	growth arrest specific 6	48.3951	15.4653	1.67116	1.45638e-08	1.64582	13	113820549	113864067							1
ENSG00000130368	MAS1	MAS1 proto-oncogene, G protein-coupled receptor	17.9119	5.7272	1.67358	0.000285022	1.64501	6	159906690	159916530							1
ENSG00000227827	AC138969.2		59.2814	18.9657	1.64531	5.67823e-10	1.64419	16	16356224	16377507		1					0
ENSG00000186603	HPDL	4-hydroxyphenylpyruvate dioxygenase like	8.22528	2.63704	1.62909	0.029177	1.64115	1	45326905	45328533							1
ENSG00000271307	AF146191.1		10.2757	3.30151	1.66489	0.0069002	1.63804	4	189979902	189982379		1					0
ENSG00000171060	C8orf74	chromosome 8 open reading frame 74	12.6279	4.0576	1.64953	0.00404434	1.63792	8	10672637	10700593							1
ENSG00000164972	C9orf24	chromosome 9 open reading frame 24	9.02406	2.90164	1.6112	0.0111635	1.63691	9	34379019	34397832							1
ENSG00000164002	EXO5	exonuclease 5	15.0005	4.8299	1.57059	0.00243703	1.63495	1	40508741	40516556							1
ENSG00000212864	RNF208	ring finger protein 208	13.4496	4.34435	1.63962	0.00294289	1.63035	9	137220247	137221581							1
ENSG00000198342	ZNF442	zinc finger protein 442	22.9749	7.43518	1.62956	0.000113298	1.62762	19	12345949	12365905							1
ENSG00000168959	GRM5	glutamate metabotropic receptor 5	10.1606	3.29556	1.5714	0.00582443	1.62439	11	88504576	89065945							1
ENSG00000159208	CIART	circadian associated repressor of transcription	10.1239	3.28595	1.63342	0.00829482	1.62338	1	150282543	150287093							1
ENSG00000174678	FAM47DP	family with sequence similarity 47 member D, pseudogene	5.31644	1.72947	1.67316	0.0461196	1.62014	0	37541077	37545262	1						0
ENSG00000197223	C1D	C1D nuclear receptor corepressor	14.5421	4.73234	1.5684	0.00112898	1.61961	2	68041130	68110948							1
ENSG00000143520	FLG2	filaggrin family member 2	13.0716	4.2564	1.58288	0.00307636	1.61873	1	152348735	152360006							1
ENSG00000235641	LINC00484	long intergenic non-protein coding RNA 484	16.6482	5.4249	1.63536	0.000915808	1.6177	9	91159573	91165658			1				0
ENSG00000279092	AC025678.3		7.59909	2.47961	1.54045	0.0433545	1.61571	15	34415450	34420273		1					0
ENSG00000185070	FLRT2	fibronectin leucine rich transmembrane protein 2	33.1101	10.8151	1.59894	2.23229e-06	1.61422	14	85530144	85654426							1
ENSG00000267122	AC004490.1		8.59591	2.81963	1.5649	0.029359	1.60815	19	2212029	2215565		1					0
ENSG00000278664	DUX4L10	double homeobox 4 like 10	8.352	2.74421	1.518	0.0202643	1.60573	10	133743332	133744598							1
ENSG00000262902	MTCO1P40	mitochondrially encoded cytochrome c oxidase I pseudogene 40	258.611	84.9912	1.60575	2.67407e-06	1.6054	17	53105734	53106358	1						0
ENSG00000250822	LINC02111	long intergenic non-protein coding RNA 2111	37.0707	12.2052	1.56598	2.42802e-07	1.60278	5	17378906	17387310			1				0
ENSG00000174403	MIR1-1HG-AS1	MIR1-1HG antisense RNA 1	9.90758	3.2638	1.64535	0.00854773	1.60198	20	62544343	62551526				1			0
ENSG00000226383	LINC01876	long intergenic non-protein coding RNA 1876	14.6762	4.83584	1.58725	0.00112949	1.60163	2	156011530	156254950			1				0
ENSG00000282961	PRNCR1	prostate cancer associated non-coding RNA 1	8.6206	2.84178	1.58637	0.0121602	1.60099	8	127079874	127092600							1
ENSG00000261522	AL845331.3		6.22076	2.05392	1.68482	0.0376589	1.59871	2	94575976	94587183		1					0
ENSG00000171495	MROH2B	maestro heat like repeat family member 2B	13.9508	4.60895	1.63154	0.00205426	1.59784	5	40998017	41071342							1
ENSG00000160185	UBASH3A	ubiquitin associated and SH3 domain containing A	10.3795	3.43084	1.57333	0.00796407	1.5971	21	42403447	42447681							1
ENSG00000273777	CEACAM20	carcinoembryonic antigen related cell adhesion molecule 20	5.71214	1.8965	1.61829	0.0415043	1.59069	19	44501677	44529788							1
ENSG00000259583	AC015712.2		27.5614	9.16464	1.60011	1.7685e-05	1.5885	15	100892859	100919283		1					0
ENSG00000144191	CNGA3	cyclic nucleotide gated channel alpha 3	6.25535	2.08569	1.54321	0.0363178	1.58457	2	98346155	98398601							1
ENSG00000135535	CD164	CD164 molecule	78.0436	26.0231	1.58873	2.46514e-12	1.58449	6	109366514	109382812							1
ENSG00000247627	MTND4P12	mitochondrially encoded NADH:ubiquinone oxidoreductase core subunit 4L pseudogene 30 #or# mitochondrially encoded NADH:ubiquinone oxidoreductase core subunit 4 pseudogene 12 /// mitochondrially encoded NADH:ubiquinone oxidoreductase core subunit 4 pseudogene 12	892.468	298.273	1.58118	2.07647e-08	1.58117	5	134926660	134928036	1						0
ENSG00000230392	AC004835.1		7.49569	2.50771	1.63316	0.0106322	1.57969	0	119291529	119335610		1					0
ENSG00000125514	LINC00029	long intergenic non-protein coding RNA 29	6.37255	2.13895	1.58504	0.0397993	1.57497	20	63034217	63037028			1				0
ENSG00000082074	FYB1	FYN binding protein 1	12.2573	4.11746	1.60621	0.00204867	1.57381	5	39105255	39274528							1
ENSG00000231649	SPATA31B1P	SPATA31 subfamily B member 1, pseudogene	5.93312	1.99406	1.66164	0.0439454	1.57308	9	82057647	82063682	1						0
ENSG00000201558	RNVU1-6	RNA, variant U1 small nuclear 6	42.1938	14.1831	1.57647	6.26776e-08	1.57286	1	146052081	146052244							1
ENSG00000265933	LINC00668	long intergenic non-protein coding RNA 668	7.7604	2.61489	1.52422	0.0322063	1.56938	18	6919496	6929966			1				0
ENSG00000278791	MIR6723	microRNA 6723	376.69	127.017	1.56578	1.31815e-09	1.56836	1	632325	632413				1			0
ENSG00000159231	CBR3	carbonyl reductase 3	15.8728	5.3591	1.52644	0.00129487	1.56649	21	36134912	36146566							1
ENSG00000183889	PKD1P1	NA #or# polycystin 1, transient receptor potential channel interacting pseudogene 1 #or# microRNA 6511a-2 /// NA #or# polycystin 1, transient receptor potential channel interacting pseudogene 1 /// NA #or# polycystin 1, transient receptor potential channel interacting pseudogene 1 #or# microRNA 6770-2 /// polycystin 1, transient receptor potential channel interacting pseudogene 1	63.1941	21.3434	1.58379	9.50218e-10	1.566	16	16317444	16350590	1						0
ENSG00000255833	TIFAB	TIFA inhibitor /// dendritic cell associated nuclear protein #or# TIFA inhibitor	13.0673	4.41382	1.52735	0.00284011	1.56586	5	135444218	135452399							1
ENSG00000221995	TIAF1	TGFB1-induced anti-apoptotic factor 1 /// myosin XVIIIA #or# TGFB1-induced anti-apoptotic factor 1	7.06754	2.38799	1.56898	0.02093	1.56541	17	29073521	29078857							1
ENSG00000203799	CCDC162P	coiled-coil domain containing 162, pseudogene	22.0335	7.44479	1.5187	0.000261619	1.56539	6	109165831	109355063	1						0
ENSG00000165949	IFI27	interferon alpha inducible protein 27	11.2128	3.793	1.55952	0.00903597	1.56374	14	94104836	94116698							1
ENSG00000176919	C8G	complement C8 gamma chain	8.68589	2.93934	1.53507	0.0472227	1.56318	9	136945246	136946974							1
ENSG00000271980	AC012640.4		8.57259	2.90164	1.54619	0.0190492	1.56286	5	10264597	10267146		1					0
ENSG00000111886	GABRR2	gamma-aminobutyric acid type A receptor rho2 subunit	8.41166	2.84772	1.63169	0.021295	1.56258	6	89257208	89315299							1
ENSG00000111981	ULBP1	UL16 binding protein 1	13.9466	4.72273	1.52969	0.00358216	1.56222	6	149964007	149973710							1
ENSG00000232177	MTND4P24	mitochondrially encoded NADH:ubiquinone oxidoreductase core subunit 4 pseudogene 24	24.9198	8.44626	1.58254	2.79975e-05	1.56091	0	126472885	126473281	1						0
ENSG00000120738	EGR1	early growth response 1	28.951	9.84466	1.58143	5.14161e-06	1.5562	5	138465490	138469315							1
ENSG00000233754	AP001628.2		9.47904	3.2261	1.58862	0.0174944	1.55495	21	42781074	42782229		1					0
ENSG00000224509	AC010884.1		6.69478	2.28082	1.59594	0.0381818	1.55349	2	104936241	105038496		1					0
ENSG00000225683	PACRG-AS3	PACRG antisense RNA 3	17.0072	5.80327	1.54188	0.00162279	1.55121	6	163165414	163192002							1
ENSG00000229604	MTATP8P2	mitochondrially encoded ATP synthase 8 pseudogene 2	221.599	75.6861	1.54825	2.47774e-05	1.54985	2	87824942	87825143	1						0
ENSG00000254122	PCDHGB7	protocadherin gamma subfamily B, 7	12.6508	4.3222	1.55744	0.00605664	1.5494	5	141417645	141512979							1
ENSG00000106853	PTGR1	prostaglandin reductase 1	7.81793	2.67474	1.51919	0.0301194	1.54739	9	111549722	111599855							1
ENSG00000145623	OSMR	oncostatin M receptor	17.7273	6.06787	1.54886	0.000637154	1.54671	5	38845858	38945596							1
ENSG00000136997	MYC	MYC proto-oncogene, bHLH transcription factor	173.283	59.3832	1.54512	1.30161e-22	1.545	8	127735434	127741434							1
ENSG00000166984	TCP10L2	t-complex 10 like 2	8.96615	3.07461	1.58146	0.013823	1.54408	6	167146414	167196913							1
ENSG00000121335	PRB2	proline rich protein BstNI subfamily 2	8.4346	2.90164	1.53595	0.0238999	1.53945	12	11391540	11501041							1
ENSG00000283676	MIR5087	microRNA 5087	24.5695	8.47142	1.51422	7.47886e-05	1.5362	1	148334479	148334554				1			0
ENSG00000102452	NALCN	sodium leak channel, non-selective	19.8927	6.87421	1.5689	0.000521773	1.53297	13	101053776	101416492							1
ENSG00000198695	MT-ND6	mitochondrially encoded NADH:ubiquinone oxidoreductase core subunit 6	12947	4474.35	1.53284	3.72101e-07	1.53287	0	14149	14673						1	0
ENSG00000229344	MTCO2P12	mitochondrially encoded cytochrome c oxidase II pseudogene 12	4062.66	1404.44	1.5324	3.86902e-07	1.53243	1	632757	633438	1						0
ENSG00000137672	TRPC6	transient receptor potential cation channel subfamily C member 6	12.8831	4.45813	1.51859	0.00523578	1.53097	11	101451564	101872562							1
ENSG00000175084	DES	desmin	5.75801	1.99406	1.60354	0.0415856	1.52986	2	219418377	219426739							1
ENSG00000279141	AL590226.2		11.6336	4.0361	1.49101	0.00778463	1.52726	9	136612024	136617181		1					0
ENSG00000240668	KRT8P36	keratin 8 pseudogene 36	6.83529	2.37244	1.51526	0.0411858	1.52663	3	138101478	138102917	1						0
ENSG00000009765	IYD	iodotyrosine deiodinase	48.4371	16.8681	1.49328	8.80887e-08	1.52182	6	150368892	150405969							1
ENSG00000183908	LRRC55	leucine rich repeat containing 55	7.47062	2.60527	1.57305	0.0260354	1.51979	11	57181747	57191717							1
ENSG00000254839	AF131215.3		6.84657	2.38799	1.50823	0.0357421	1.51958	8	11062647	11067089		1					0
ENSG00000230442	AC006333.1		8.46705	2.9549	1.50092	0.0368216	1.51875	7	123584859	123624957		1					0
ENSG00000267541	MTCO2P2	mitochondrially encoded cytochrome c oxidase II pseudogene 2	116.915	40.8478	1.51817	0.000119401	1.51713	18	47853233	47853457	1						0
ENSG00000261842	AC073314.1		6.82577	2.38799	1.54223	0.0391244	1.51519	7	149422675	149424890		1					0
ENSG00000164588	HCN1	hyperpolarization activated cyclic nucleotide gated potassium channel 1	21.0621	7.36872	1.50162	0.000421155	1.51517	5	45254950	45696498							1
ENSG00000105889	STEAP1B	STEAP family member 1B	19.6125	6.86167	1.49732	0.000910948	1.51514	7	22419444	22632925							1
ENSG00000188163	FAM166A	family with sequence similarity 166 member A	34.2657	12.0005	1.47743	3.47736e-06	1.51367	9	137243584	137247770							1
ENSG00000260001	TGFBR3L	transforming growth factor beta receptor 3 like	13.4764	4.72273	1.52057	0.00651663	1.51275	19	7916145	7919097							1
ENSG00000210117	MT-TW	mitochondrially encoded tRNA tryptophan	633.084	221.902	1.51383	8.33445e-08	1.51247	0	5512	5579						1	0
ENSG00000196757	ZNF700	zinc finger protein 700 /// zinc finger protein 700 #or# NA	9.0124	3.16624	1.49041	0.0371807	1.50914	19	11925068	11950773							1
ENSG00000068650	ATP11A	ATPase phospholipid transporting 11A	47.4065	16.659	1.53091	6.11974e-08	1.50878	13	112690329	112887168							1
ENSG00000285051	AC026316.4		6.4876	2.28082	1.58408	0.0227797	1.50813	3	170448639	170860993		1					0
ENSG00000172426	RSPH9	radial spoke head 9 homolog	13.463	4.73828	1.50129	0.00434193	1.50657	6	43645046	43672599							1
ENSG00000210164	MT-TG	mitochondrially encoded cytochrome c oxidase III #or# mitochondrially encoded tRNA glycine /// mitochondrially encoded NADH:ubiquinone oxidoreductase core subunit 3 #or# mitochondrially encoded tRNA glycine /// mitochondrially encoded tRNA glycine	5324.48	1874.28	1.50628	2.76716e-06	1.5063	0	9991	10058						1	0
ENSG00000187066	TMEM262	transmembrane protein 262	8.34248	2.93934	1.5217	0.022237	1.50498	11	65084979	65089375							1
ENSG00000213755	AC093270.1		9.18926	3.24165	1.53638	0.0233891	1.50322	5	79510434	79510919		1					0
ENSG00000006757	PNPLA4	patatin like phospholipase domain containing 4	17.5045	6.18099	1.5027	0.00094222	1.50182	0	7898247	7927739							1
ENSG00000226706	AL161452.1		9.14301	3.23571	1.45921	0.0219617	1.49859	9	135503273	135506447		1					0
ENSG00000041515	MYO16	myosin XVI	18.4914	6.55937	1.48826	0.00148409	1.49523	13	108596152	109208007							1
ENSG00000198695	MT-TE	mitochondrially encoded NADH:ubiquinone oxidoreductase core subunit 6 #or# mitochondrially encoded tRNA glutamic acid /// mitochondrially encoded tRNA glutamic acid	2640.83	938.592	1.4923	8.10213e-07	1.49242	0	14149	14673						1	0
ENSG00000149972	CNTN5	contactin 5	12.0268	4.28449	1.50764	0.0043378	1.48905	11	99020953	100358885							1
ENSG00000270906	MTND4P35	mitochondrially encoded NADH:ubiquinone oxidoreductase core subunit 4L pseudogene 5 #or# mitochondrially encoded NADH:ubiquinone oxidoreductase core subunit 4 pseudogene 35 /// mitochondrially encoded NADH:ubiquinone oxidoreductase core subunit 4 pseudogene 35	100.22	35.72	1.4839	6.43709e-06	1.48837	5	100048988	100050362	1						0
ENSG00000029639	TFB1M	transcription factor B1, mitochondrial	55.1577	19.6625	1.47172	1.29331e-08	1.48811	6	155257509	155314493							1
ENSG00000148584	A1CF	APOBEC1 complementation factor	9.41976	3.36137	1.54893	0.0114095	1.48664	10	50799409	50885675							1
ENSG00000205746	AC126755.1	NA /// NA #or# microRNA 6511a-4 /// NA #or# nuclear pore complex interacting protein family member A8	61.6933	22.0314	1.46104	7.85381e-09	1.48555	16	18334400	18352476							1
ENSG00000267659	LINC01482	long intergenic non-protein coding RNA 1482	7.2652	2.60527	1.60114	0.0159891	1.47957	17	68591796	68763882			1				0
ENSG00000169247	SH3TC2	SH3 domain and tetratricopeptide repeats 2	25.8911	9.29038	1.43288	0.000125202	1.47865	5	148923639	149063163							1
ENSG00000138496	PARP9	poly(ADP-ribose) polymerase family member 9	22.8439	8.20088	1.42348	0.000264327	1.47796	3	122527924	122564577							1
ENSG00000163959	SLC51A	solute carrier family 51 alpha subunit	10.6234	3.81515	1.49614	0.00760539	1.47743	3	196211487	196243178							1
ENSG00000260702	AL031713.1		10.8327	3.89056	1.51941	0.0126075	1.47734	16	1101260	1105461		1					0
ENSG00000134871	COL4A2	collagen type IV alpha 2 chain	36.4721	13.1091	1.48591	2.11956e-06	1.47622	13	110305812	110513027							1
ENSG00000188660	LINC00319	long intergenic non-protein coding RNA 319	12.5704	4.52694	1.47156	0.00781983	1.47342	21	43446601	43453893			1				0
ENSG00000197768	STPG3	sperm-tail PG-rich repeat containing 3	8.54966	3.08121	1.51849	0.0281143	1.47237	9	137251261	137253483							1
ENSG00000198517	MAFK	MAF bZIP transcription factor K	38.2419	13.7832	1.46357	3.85297e-06	1.47224	7	1530714	1543043							1
ENSG00000228253	MT-ATP8	mitochondrially encoded ATP synthase membrane subunit 8 /// mitochondrially encoded tRNA lysine #or# mitochondrially encoded ATP synthase membrane subunit 8	5809.01	2094.69	1.47152	8.62449e-07	1.47155	0	8366	8572						1	0
ENSG00000237463	AL157714.2		12.0363	4.34435	1.48058	0.00478248	1.47018	1	165476841	165582155		1					0
ENSG00000142515	KLK3	kallikrein related peptidase 3	6.49926	2.35029	1.44233	0.0470913	1.46744	19	50854915	50860764							1
ENSG00000130177	CDC16	cell division cycle 16	25.2325	9.14249	1.47144	0.000138707	1.46462	13	114234887	114272723							1
ENSG00000261703	LINC02168	long intergenic non-protein coding RNA 2168	7.20553	2.61489	1.43269	0.0333107	1.46236	16	50806668	50807629			1				0
ENSG00000227508	LINC01624	long intergenic non-protein coding RNA 1624	12.6971	4.60895	1.47283	0.00562282	1.46199	6	170272474	170279887			1				0
ENSG00000233614	DDX11L10	DEAD/H-box helicase 11 like 10	6.63939	2.41015	1.48588	0.0441654	1.46193	16	11555	14090							1
ENSG00000261889	AC108134.2		56.043	20.3485	1.47494	2.11008e-08	1.46161	16	3156736	3157483		1					0
ENSG00000249780	AC093809.1		8.33082	3.03097	1.41562	0.0163926	1.45868	4	12640298	12640637		1					0
ENSG00000139178	C1RL	complement C1r subcomponent like	9.80166	3.56611	1.49406	0.0108883	1.45868	12	7089587	7109273							1
ENSG00000182256	GABRG3	gamma-aminobutyric acid type A receptor gamma3 subunit	10.9711	3.99774	1.45064	0.0196666	1.45645	15	26971282	27541991							1
ENSG00000210151	MT-TS1	mitochondrially encoded tRNA serine 1 (UCN)	1016.1	370.502	1.45524	1.47252e-06	1.45549	0	7446	7514						1	0
ENSG00000210140	MT-TC	mitochondrially encoded tRNA cysteine	365.666	133.352	1.45502	1.42318e-05	1.45529	0	5761	5826						1	0
ENSG00000179407	DNAJB8	DnaJ heat shock protein family (Hsp40) member B8	10.2182	3.73314	1.45046	0.015876	1.45267	3	128462439	128467248							1
ENSG00000185028	LRRC14B	leucine rich repeat containing 14B	6.53561	2.38799	1.47714	0.0422964	1.45252	5	191511	195353							1
ENSG00000120903	CHRNA2	cholinergic receptor nicotinic alpha 2 subunit	10.796	3.95042	1.48675	0.0174411	1.45041	8	27459761	27479883							1
ENSG00000205333	GOLGA2P1	GOLGA2 pseudogene 1	7.75088	2.84178	1.42315	0.0424051	1.44757	8	86657388	86660293	1						0
ENSG00000204380	PKP4-AS1	PKP4 antisense RNA 1	8.10071	2.97705	1.49491	0.0251101	1.44417	2	158658337	158735002							1
ENSG00000166578	IQCD	IQ motif containing D	11.1549	4.1019	1.4516	0.00970551	1.44331	12	113195441	113221094							1
ENSG00000198840	MT-ND3	mitochondrially encoded NADH:ubiquinone oxidoreductase core subunit 3 #or# mitochondrially encoded tRNA arginine /// mitochondrially encoded NADH:ubiquinone oxidoreductase core subunit 3 #or# mitochondrially encoded tRNA arginine #or# mitochondrially encoded NADH:ubiquinone oxidoreductase core subunit 4L /// mitochondrially encoded NADH:ubiquinone oxidoreductase core subunit 3	12362.6	4554.33	1.44066	2.79719e-06	1.44066	0	10059	10404						1	0
ENSG00000209082	MT-TL1	mitochondrially encoded tRNA leucine 1 (UUA/G) #or# mitochondrially encoded 16S RNA /// mitochondrially encoded tRNA leucine 1 (UUA/G)	2977.12	1100.91	1.43514	2.04541e-06	1.43522	0	3230	3304						1	0
ENSG00000248713	C4orf54	chromosome 4 open reading frame 54	11.6795	4.3222	1.4593	0.0101307	1.43414	4	99636529	99654648							1
ENSG00000232295	AL589935.1		9.05827	3.35542	1.38222	0.0262411	1.43274	6	71221457	71328228		1					0
ENSG00000109101	FOXN1	forkhead box N1	10.8881	4.0361	1.35482	0.0180749	1.43171	17	28506243	28538896							1
ENSG00000206432	TMEM200C	transmembrane protein 200C	17.4375	6.46774	1.45274	0.00121096	1.43086	18	5882072	5895955							1
ENSG00000155099	PIP4P2	phosphatidylinositol-4,5-bisphosphate 4-phosphatase 2	15.3158	5.68356	1.3976	0.00328019	1.43015	8	90993796	91041064							1
ENSG00000129009	ISLR	immunoglobulin superfamily containing leucine rich repeat	6.53561	2.4257	1.4743	0.0341353	1.42992	15	74173671	74176872							1
ENSG00000267260	AC020928.2		9.03534	3.35542	1.38143	0.0271185	1.42908	19	36773153	36777078		1					0
ENSG00000166349	RAG1	recombination activating 1	9.84753	3.65773	1.40716	0.0115111	1.42881	11	36510709	36593156							1
ENSG00000210191	MT-TL2	mitochondrially encoded tRNA histidine #or# mitochondrially encoded tRNA serine 2 (AGU/C) #or# mitochondrially encoded tRNA leucine 2 (CUN) /// mitochondrially encoded NADH:ubiquinone oxidoreductase core subunit 5 #or# mitochondrially encoded tRNA leucine 2 (CUN) /// mitochondrially encoded tRNA serine 2 (AGU/C) #or# mitochondrially encoded tRNA leucine 2 (CUN) /// mitochondrially encoded tRNA le…	4395.34	1633.49	1.42798	1.43928e-06	1.42802	0	12266	12336						1	0
ENSG00000112038	OPRM1	opioid receptor mu 1	21.2714	7.91046	1.45294	0.000647547	1.42708	6	154010496	154246867							1
ENSG00000134698	AGO4	argonaute 4, RISC catalytic component	11.4144	4.24679	1.45531	0.00689868	1.42641	1	35808172	35857890							1
ENSG00000187630	DHRS4L2	dehydrogenase/reductase 4 like 2	9.70954	3.61635	1.56538	0.0101065	1.42487	14	23969874	24006408							1
ENSG00000210100	MT-TI	mitochondrially encoded tRNA isoleucine	746.433	278.174	1.42333	5.76995e-07	1.42403	0	4263	4331						1	0
ENSG00000204677	FAM153C	family with sequence similarity 153 member C	7.47238	2.78786	1.46651	0.031374	1.42241	5	178006405	178055559							1
ENSG00000198712	MT-CO2	mitochondrially encoded cytochrome c oxidase II #or# mitochondrially encoded tRNA lysine /// mitochondrially encoded cytochrome c oxidase II	20793.1	7764.36	1.42116	1.93481e-06	1.42116	0	7586	8269						1	0
ENSG00000249119	MTND6P4	mitochondrially encoded NADH:ubiquinone oxidoreductase core subunit 6 pseudogene 4	670.661	250.451	1.42106	1.09075e-06	1.42106	5	134924123	134924644	1						0
ENSG00000280850	AL121956.4		8.63012	3.2261	1.41654	0.0231171	1.41959	6	166275462	166277077		1					0
ENSG00000163682	RPL9	ribosomal protein L9	27.0524	10.1129	1.39383	7.35509e-05	1.41955	4	39452521	39458949							1
ENSG00000225174	OSTM1-AS1	OSTM1 antisense RNA 1	8.72224	3.2638	1.41981	0.0442824	1.41815	6	108123515	108159392							1
ENSG00000248445	SEMA6A-AS1	SEMA6A antisense RNA 1	8.27115	3.09677	1.46444	0.0225709	1.41733	5	116447547	116508276							1
ENSG00000272259	LINC01749	long intergenic non-protein coding RNA 1749	9.60362	3.59787	1.36893	0.0180689	1.41644	20	63009383	63085071			1				0
ENSG00000224184	MIR3681HG	MIR3681 host gene	8.71096	3.2638	1.41905	0.0285395	1.41628	2	11848622	12578348				1			0
ENSG00000143167	GPA33	glycoprotein A33	11.551	4.34802	1.31849	0.0199949	1.40959	1	167052836	167166479							1
ENSG00000127249	ATP13A4	ATPase 13A4	9.45397	3.56016	1.36468	0.0197477	1.40898	3	193402077	193593111							1
ENSG00000008517	IL32	interleukin 32	8.52672	3.21355	1.32482	0.0314229	1.40782	16	3065297	3082192							1
ENSG00000210135	MT-TN	mitochondrially encoded tRNA asparagine #or# mitochondrially encoded tRNA cysteine /// mitochondrially encoded tRNA alanine #or# mitochondrially encoded tRNA asparagine /// mitochondrially encoded tRNA asparagine	2712.63	1022.85	1.40708	6.0522e-06	1.4071	0	5657	5729						1	0
ENSG00000091181	IL5RA	interleukin 5 receptor subunit alpha /// interleukin 5 receptor subunit alpha #or# CNTN4 antisense RNA 1	16.7061	6.31032	1.39085	0.00448415	1.40459	3	3066326	3126613							1
ENSG00000249375	CASC11	cancer susceptibility 11 (non-protein coding)	8.0389	3.03691	1.41915	0.0259234	1.4044	8	127686343	127733967							1
ENSG00000198786	MT-ND5	mitochondrially encoded NADH:ubiquinone oxidoreductase core subunit 5	63125.8	23876	1.40266	2.34556e-06	1.40267	0	12337	14148						1	0
ENSG00000210176	MT-TH	mitochondrially encoded tRNA histidine #or# mitochondrially encoded tRNA serine 2 (AGU/C) /// mitochondrially encoded tRNA histidine	2607.07	986.433	1.40207	1.01811e-06	1.40214	0	12138	12206						1	0
ENSG00000146147	MLIP	muscular LMNA interacting protein	7.48404	2.83217	1.46851	0.0261315	1.40191	6	53929982	54266280							1
ENSG00000210112	MT-TM	mitochondrially encoded tRNA methionine /// mitochondrially encoded NADH:ubiquinone oxidoreductase core subunit 2 #or# mitochondrially encoded tRNA methionine	1984.57	751.16	1.40154	2.14909e-06	1.40163	0	4402	4469						1	0
ENSG00000234663	LINC01934	long intergenic non-protein coding RNA 1934	22.846	8.66061	1.38077	0.000273067	1.3994	2	181086076	181409321			1				0
ENSG00000274279	SPATA31E3P	SPATA31 subfamily E member 3, pseudogene	7.31145	2.77231	1.45426	0.0417733	1.39907	15	22401208	22406944	1						0
ENSG00000255458	AC108471.2		19.1363	7.2622	1.35628	0.00188127	1.39783	4	39639140	39666644		1					0
ENSG00000210144	MT-TY	mitochondrially encoded tRNA cysteine #or# mitochondrially encoded tRNA tyrosine /// mitochondrially encoded tRNA tyrosine	3485.25	1322.95	1.39754	4.87831e-06	1.3975	0	5826	5891						1	0
ENSG00000198758	EPS8L3	EPS8 like 3	7.73746	2.93934	1.36884	0.0298657	1.39637	1	109750080	109764027							1
ENSG00000163879	DNALI1	dynein axonemal light intermediate chain 1	13.8908	5.27709	1.34124	0.0102752	1.39632	1	37556919	37566857							1
ENSG00000270230	MTND6P22	mitochondrially encoded NADH:ubiquinone oxidoreductase core subunit 6 pseudogene 22	33.401	12.6996	1.40294	0.00577603	1.3951	5	100046450	100046970	1						0
ENSG00000230561	CCDC192	coiled-coil domain containing 192	6.17665	2.35029	1.40976	0.0485986	1.39399	5	127703389	127941634							1
ENSG00000185985	SLITRK2	SLIT and NTRK like family member 2	10.4988	3.99774	1.4229	0.00914606	1.39297	0	145817832	145829856							1
ENSG00000168672	FAM84B	family with sequence similarity 84 member B	75.1799	28.633	1.40779	1.24274e-08	1.39267	8	126552442	126558393							1
ENSG00000210156	MT-TK	mitochondrially encoded tRNA lysine	950.882	362.672	1.39016	2.24149e-07	1.3906	0	8295	8364						1	0
ENSG00000198899	MT-ATP6	mitochondrially encoded ATP synthase membrane subunit 6 #or# mitochondrially encoded ATP synthase membrane subunit 8 /// mitochondrially encoded ATP synthase membrane subunit 6 /// mitochondrially encoded ATP synthase membrane subunit 6 #or# mitochondrially encoded cytochrome c oxidase III	21982.7	8386.98	1.39014	1.79515e-06	1.39015	0	8527	9207						1	0
ENSG00000199879	RNU1-120P	RNA, U1 small nuclear 120, pseudogene	25.4739	9.719	1.36695	0.000483822	1.39014	1	148263476	148263632	1						0
ENSG00000231160	KLF3-AS1	KLF3 antisense RNA 1	25.0599	9.56451	1.41788	0.000174308	1.38962	4	38612701	38664883							1
ENSG00000238825	RNU1-13P	RNA, U1 small nuclear 13, pseudogene	18.7029	7.15803	1.37055	0.0013956	1.38563	1	148388490	148388651	1						0
ENSG00000146276	GABRR1	gamma-aminobutyric acid type A receptor rho1 subunit	7.60123	2.91125	1.30899	0.0445266	1.3846	6	89177501	89231278							1
ENSG00000243056	EIF4EBP3	eukaryotic translation initiation factor 4E binding protein 3 #or# ANKHD1-EIF4EBP3 readthrough /// eukaryotic translation initiation factor 4E binding protein 3	8.85109	3.39313	1.36127	0.0280317	1.38324	5	140547666	140549578							1
ENSG00000284618	AL391294.1		7.28638	2.79446	1.41686	0.0486603	1.38263	0	81000150	81004217		1					0
ENSG00000225630	MTND2P28	mitochondrially encoded NADH:ubiquinone oxidoreductase core subunit 2 pseudogene 28	9639.05	3701.29	1.38085	5.20425e-06	1.38086	1	629640	630683	1						0
ENSG00000232633	AC079465.1		7.49569	2.87948	1.36061	0.048806	1.38025	5	113323028	113437174		1					0
ENSG00000084453	SLCO1A2	solute carrier organic anion transporter family member 1A2	22.9473	8.81803	1.36632	0.000712593	1.3798	12	21264600	21419594							1
ENSG00000210107	MT-TQ	mitochondrially encoded tRNA glutamine	1916.38	736.806	1.37897	2.89007e-06	1.37903	0	4329	4400						1	0
ENSG00000183426	AC138932.1	NA /// nuclear pore complex interacting protein family member A1 #or# NA #or# microRNA 6770-1 /// nuclear pore complex interacting protein family member A1 #or# NA	55.0141	21.1866	1.3961	1.10718e-07	1.37665	16	14922802	14952060							1
ENSG00000174171	AC020659.1		12.0155	4.6311	1.41347	0.00789046	1.37547	15	41892793	41898575		1					0
ENSG00000198670	LPA	lipoprotein(a)	33.0409	12.7433	1.4131	1.28576e-05	1.37451	6	160531483	160664259							1
ENSG00000224417	AL606970.1		7.67042	2.9615	1.39994	0.0358853	1.37298	6	168298069	168302114		1					0
ENSG00000277406	AC245407.1		36.8268	14.2304	1.34972	9.07303e-06	1.37178	1	146321214	146401647		1					0
ENSG00000086991	NOX4	NADPH oxidase 4	9.52316	3.67988	1.35861	0.0214254	1.37178	11	89324356	89498187							1
ENSG00000187498	COL4A1	collagen type IV alpha 1 chain	19.0347	7.36571	1.3946	0.000947136	1.36973	13	110148963	110307149							1
ENSG00000204956	PCDHGA1	protocadherin gamma subfamily A, 1	10.6692	4.13367	1.3285	0.0186065	1.36796	5	141330571	141512981							1
ENSG00000210154	MT-TD	mitochondrially encoded tRNA aspartic acid /// mitochondrially encoded cytochrome c oxidase II #or# mitochondrially encoded tRNA aspartic acid	3441.01	1333.58	1.36749	7.49263e-06	1.36752	0	7518	7585						1	0
ENSG00000115085	ZAP70	zeta chain of T cell receptor associated protein kinase 70	12.72	4.93341	1.38607	0.00891958	1.36644	2	97713560	97739862							1
ENSG00000011201	ANOS1	anosmin 1	8.72438	3.39313	1.35139	0.0275926	1.36244	0	8528874	8732186							1
ENSG00000250091	DNAH10OS	dynein axonemal heavy chain 10 opposite strand	10.4045	4.05166	1.32183	0.0266331	1.36063	12	123926424	123934984							1
ENSG00000269028	MTRNR2L12	MT-RNR2 like 12	590.371	230.397	1.35772	6.59946e-07	1.3575	3	96617188	96618236							1
ENSG00000148408	CACNA1B	calcium voltage-gated channel subunit alpha1 B	27.285	10.6487	1.33797	0.000105974	1.35743	9	137877789	138124624							1
ENSG00000231453	LINC01305	long intergenic non-protein coding RNA 1305	7.43817	2.90758	1.4458	0.0375677	1.35513	2	174326027	174330643			1				0
ENSG00000169583	CLIC3	chloride intracellular channel 3	13.6684	5.34355	1.2971	0.0163763	1.35498	9	136994635	136996803							1
ENSG00000091831	ESR1	estrogen receptor 1	64.5789	25.2515	1.35719	1.43447e-08	1.35469	6	151656691	152129619							1
ENSG00000229807	XIST	X inactive specific transcript (non-protein coding) /// X inactive specific transcript (non-protein coding) #or# NA	640.44	250.523	1.35084	4.91621e-24	1.35412	0	73820651	73852753							1
ENSG00000140563	MCTP2	multiple C2 and transmembrane domain containing 2	14.6762	5.74342	1.30924	0.00514301	1.35349	15	94231538	94483952							1
ENSG00000198938	MT-CO3	mitochondrially encoded cytochrome c oxidase III	22612.3	8856.48	1.3523	5.81713e-06	1.3523	0	9207	9990						1	0
ENSG00000248527	MTATP6P1	mitochondrially encoded ATP synthase 6 pseudogene 1 /// mitochondrially encoded ATP synthase 8 pseudogene 1 #or# mitochondrially encoded ATP synthase 6 pseudogene 1	6483.98	2545.2	1.34908	1.92944e-06	1.3491	1	633696	634376	1						0
ENSG00000171368	TPPP	tubulin polymerization promoting protein	16.4177	6.45219	1.36944	0.00184514	1.34739	5	659862	693395							1
ENSG00000269352	PTOV1-AS2	PTOV1 antisense RNA 2	11.132	4.37611	1.29694	0.0217321	1.34699	19	49856970	49859289							1
ENSG00000180801	ARSJ	arylsulfatase family member J	40.4349	15.897	1.36484	2.50473e-06	1.34685	4	113900284	113979727							1
ENSG00000130595	TNNT3	troponin T3, fast skeletal type	10.6484	4.18693	1.34522	0.0118513	1.34668	11	1919562	1938706							1
ENSG00000215866	LINC01356	long intergenic non-protein coding RNA 1356	13.7645	5.41896	1.32399	0.0114521	1.34486	1	112820170	112850643			1				0
ENSG00000230316	FEZF1-AS1	FEZF1 antisense RNA 1	31.7197	12.4913	1.33834	7.67687e-05	1.34445	7	122303658	122310077							1
ENSG00000198763	MT-ND2	mitochondrially encoded NADH:ubiquinone oxidoreductase core subunit 2 #or# mitochondrially encoded tRNA tryptophan /// mitochondrially encoded NADH:ubiquinone oxidoreductase core subunit 2	27814.5	10966.6	1.34272	6.59696e-06	1.34272	0	4470	5511						1	0
ENSG00000164520	RAET1E	retinoic acid early transcript 1E	9.6728	3.81515	1.35291	0.0217769	1.34219	6	149883375	149898102							1
ENSG00000198886	MT-ND4	mitochondrially encoded NADH:ubiquinone oxidoreductase core subunit 4 #or# mitochondrially encoded NADH:ubiquinone oxidoreductase core subunit 4L /// mitochondrially encoded NADH:ubiquinone oxidoreductase core subunit 4 #or# mitochondrially encoded tRNA histidine /// mitochondrially encoded NADH:ubiquinone oxidoreductase core subunit 4	49679.9	19597	1.34202	4.88112e-06	1.34203	0	10760	12137						1	0
ENSG00000280587	LINC01348	long intergenic non-protein coding RNA 1348	31.3152	12.3686	1.34891	4.01876e-05	1.34018	1	235065479	235074220			1				0
ENSG00000249413	AC116049.2		36.1686	14.3034	1.3307	1.86998e-05	1.33837	4	65998846	66150012		1					0
ENSG00000016402	IL20RA	interleukin 20 receptor subunit alpha	8.25036	3.2638	1.38302	0.029172	1.3379	6	136999971	137045180							1
ENSG00000141161	UNC45B	unc-45 myosin chaperone B	11.3067	4.47368	1.3187	0.0157425	1.33765	17	35147817	35189345							1
ENSG00000184507	NUTM1	NUT midline carcinoma family member 1	11.2262	4.44192	1.37701	0.0148585	1.33762	15	34343315	34357737							1
ENSG00000026508	CD44	CD44 molecule (Indian blood group)	20.544	8.13141	1.33934	0.00216486	1.33714	11	35138870	35232402							1
ENSG00000277610	RNVU1-4	RNA, variant U1 small nuclear 4	22.5792	8.93775	1.35011	0.000220309	1.33701	1	120942600	120942763							1
ENSG00000279778	AL445437.1		17.1131	6.78626	1.32416	0.00192542	1.33441	1	87805286	87808372		1					0
ENSG00000106948	AKNA	AT-hook transcription factor	34.7094	13.7676	1.32665	1.20577e-05	1.33404	9	114334156	114394405							1
ENSG00000135436	FAM186B	family with sequence similarity 186 member B	7.86632	3.12853	1.30495	0.0439426	1.3302	12	49582885	49605639							1
ENSG00000210195	MT-TT	mitochondrially encoded tRNA threonine	1696.99	675.066	1.32988	1.43385e-05	1.32988	0	15888	15953						1	0
ENSG00000283010	AL589826.2		10.9802	4.37611	1.26415	0.0261065	1.32718	6	98829967	98832508		1					0
ENSG00000240184	PCDHGC3	protocadherin gamma subfamily C, 3	15.3962	6.14329	1.32188	0.00345655	1.32549	5	141475947	141512979							1
ENSG00000099800	TIMM13	translocase of inner mitochondrial membrane 13	45.7012	18.2413	1.31012	3.03592e-06	1.32502	19	2425624	2427894							1
ENSG00000267052	AC005050.1		10.8786	4.34435	1.34211	0.0176824	1.32427	7	106570947	106598908		1					0
ENSG00000225499	RPL15P4	ribosomal protein L15 pseudogene 4 /// mitochondrial coiled-coil domain 1 #or# ribosomal protein L15 pseudogene 4	22.5922	9.03898	1.29792	0.00130246	1.3216	6	31528114	31528693	1						0
ENSG00000196646	ZNF136	zinc finger protein 136	18.209	7.29925	1.31022	0.00313983	1.31884	19	12163064	12189881							1
ENSG00000101342	TLDC2	TBC/LysM-associated domain containing 2	7.42651	2.97705	1.34106	0.0355493	1.3188	20	36876121	36894235							1
ENSG00000135898	GPR55	G protein-coupled receptor 55	7.13673	2.86393	1.29493	0.0483297	1.31727	2	230907318	230961066							1
ENSG00000210127	MT-TA	mitochondrially encoded tRNA alanine	1807.68	726.536	1.31484	6.4928e-06	1.31503	0	5587	5655						1	0
ENSG00000248690	HAS2-AS1	HAS2 antisense RNA 1	26.1121	10.5038	1.29289	0.000400255	1.3138	8	121639293	121644693							1
ENSG00000168594	ADAM29	ADAM metallopeptidase domain 29	7.86594	3.16624	1.29711	0.0464287	1.31285	4	174829668	174978180							1
ENSG00000259154	DUX4L17	double homeobox 4 like 17	12.4779	5.02503	1.31063	0.00905517	1.31217	0	11314921	11316187							1
ENSG00000221676	RNU6ATAC	RNA, U6atac small nuclear (U12-dependent splicing)	11.2449	4.53354	1.26353	0.0241142	1.31056	9	134164439	134164564							1
ENSG00000214553	LRRC37A11P	leucine rich repeat containing 37 member A11, pseudogene	8.98947	3.62597	1.34185	0.0338964	1.30987	17	39027277	39053205	1						0
ENSG00000185507	IRF7	interferon regulatory factor 7	37.177	14.999	1.31213	1.39673e-05	1.30954	11	612553	615999							1
ENSG00000210049	MT-TF	mitochondrially encoded tRNA phenylalanine #or# mitochondrially encoded 12S RNA /// mitochondrially encoded tRNA phenylalanine	2603.72	1052.31	1.30695	2.97505e-06	1.30702	0	577	647						1	0
ENSG00000145536	ADAMTS16	ADAM metallopeptidase with thrombospondin type 1 motif 16	10.8902	4.40421	1.33984	0.0133366	1.30608	5	5140330	5320304							1
ENSG00000198804	MT-CO1	mitochondrially encoded cytochrome c oxidase I	48726	19711.9	1.30562	4.94594e-06	1.30562	0	5904	7445						1	0
ENSG00000225972	MTND1P23	mitochondrially encoded NADH:ubiquinone oxidoreductase core subunit 1 pseudogene 23	3687.89	1492.61	1.30496	9.30787e-06	1.30496	1	629062	629433	1						0
ENSG00000240409	MTATP8P1	mitochondrially encoded ATP synthase 8 pseudogene 1	194.741	78.8552	1.30406	0.000428956	1.30428	1	633535	633741	1						0
ENSG00000261104	AC093904.4		9.29304	3.7649	1.26287	0.0360165	1.30354	2	9106593	9109865		1					0
ENSG00000250722	SELENOP	selenoprotein P	17.7251	7.18613	1.29871	0.00341052	1.30251	5	42799880	42887392							1
ENSG00000057593	F7	coagulation factor VII	12.2322	4.95923	1.22517	0.0324507	1.3025	13	113105788	113120681							1
ENSG00000185296	AC026785.1		7.15015	2.90164	1.33339	0.031731	1.30111	5	17306381	17306960		1					0
ENSG00000284966	AL138689.2		16.9359	6.87421	1.3185	0.00615914	1.30082	13	106492148	106521630		1					0
ENSG00000109158	GABRA4	gamma-aminobutyric acid type A receptor alpha4 subunit	7.43817	3.02136	1.33935	0.0397495	1.29975	4	46918900	46994407							1
ENSG00000225606	AC005281.1		8.60718	3.50625	1.29568	0.0384989	1.29561	7	12570125	12571392		1					0
ENSG00000254681	PKD1P5	polycystin 1, transient receptor potential channel interacting pseudogene 5	53.4504	21.7787	1.28184	1.16078e-06	1.29528	16	18374521	18401940	1						0
ENSG00000259932	AC051619.7		23.7962	9.69751	1.24927	0.000496797	1.29505	15	45198517	45199139		1					0
ENSG00000102466	FGF14	fibroblast growth factor 14	13.6957	5.59853	1.30632	0.00983716	1.2906	13	101710804	102402457							1
ENSG00000237973	MTCO1P12	mitochondrially encoded cytochrome c oxidase I pseudogene 12	12270.4	5016.72	1.29035	9.69946e-06	1.29036	1	631074	632616	1						0
ENSG00000198744	MTCO3P12	mitochondrially encoded cytochrome c oxidase III pseudogene 12 /// mitochondrially encoded cytochrome c oxidase III pseudogene 12 #or# mitochondrially encoded ATP synthase 6 pseudogene 1	3412.65	1396.19	1.28941	7.30646e-06	1.2894	1	634376	634922	1						0
ENSG00000182218	HHIPL1	HHIP like 1	15.1894	6.21936	1.26817	0.00626502	1.28823	14	99645110	99680569							1
ENSG00000259370	AC103740.1		7.87759	3.2261	1.29141	0.0419302	1.28797	15	62827675	62884034		1					0
ENSG00000181634	TNFSF15	TNF superfamily member 15	9.30218	3.81515	1.29795	0.0307584	1.28583	9	114784635	114806126							1
ENSG00000235142	LINC02532	long intergenic non-protein coding RNA 2532	10.5312	4.3222	1.29844	0.0191152	1.28484	6	106717452	106787541			1				0
ENSG00000157765	SLC34A2	solute carrier family 34 member 2	8.1215	3.33327	1.24764	0.0427556	1.28481	4	25648011	25678748							1
ENSG00000198727	MT-CYB	mitochondrially encoded cytochrome b /// mitochondrially encoded cytochrome b #or# mitochondrially encoded tRNA threonine	42007.2	17244.3	1.28451	1.27782e-05	1.28452	0	14747	15887						1	0
ENSG00000205334	LINC01460	long intergenic non-protein coding RNA 1460	20.7265	8.51572	1.28311	0.00138613	1.28327	2	27705786	27715732			1				0
ENSG00000273769	U52112.1		10.552	4.33841	1.21734	0.0350201	1.28228	0	153880672	153888990		1					0
ENSG00000121207	LRAT	lecithin retinol acyltransferase	16.5172	6.80181	1.23767	0.00763331	1.27998	4	154626945	154753118							1
ENSG00000127928	GNGT1	G protein subunit gamma transducin 1	10.4024	4.28449	1.26751	0.021291	1.27972	7	93591573	93911265							1
ENSG00000210082	MT-RNR2	mitochondrially encoded 16S RNA	54974.1	22682.8	1.27715	1.76365e-05	1.27715	0	1671	3229						1	0
ENSG00000211896	IGHG1	immunoglobulin heavy constant gamma 1 (G1m marker)	9.96258	4.11152	1.23078	0.0293107	1.27685	14	105736343	105743071							1
ENSG00000172349	IL16	interleukin 16	16.3719	6.75816	1.22384	0.00350552	1.27652	15	81159575	81314058							1
ENSG00000210196	MT-TP	mitochondrially encoded tRNA proline	3571.12	1474.22	1.27641	2.84736e-05	1.27643	0	15956	16023						1	0
ENSG00000260997	AC004847.1		10.2873	4.24679	1.2663	0.0286688	1.27643	7	44958999	44960909		1					0
ENSG00000182752	PAPPA	pappalysin 1	14.9568	6.17505	1.24069	0.00722832	1.27628	9	116153804	116402322							1
ENSG00000184497	TMEM255B	transmembrane protein 255B /// transmembrane protein 255B #or# GAS6 antisense RNA 1	25.2826	10.444	1.27212	0.000539341	1.27547	13	113759240	113816995							1
ENSG00000168453	HR	HR, lysine demethylase and nuclear receptor corepressor	42.7603	17.7025	1.27519	8.56073e-06	1.27232	8	22114415	22133384							1
ENSG00000148341	SH3GLB2	SH3 domain containing GRB2 like, endophilin B2	52.7363	21.8643	1.2821	2.34122e-06	1.27022	9	129007036	129028303							1
ENSG00000175899	A2M	alpha-2-macroglobulin	9.11794	3.78046	1.21613	0.041128	1.27015	12	9067664	9116229							1
ENSG00000172020	GAP43	growth associated protein 43	11.1666	4.6311	1.27192	0.0181309	1.26976	3	115623324	115721490							1
ENSG00000248923	MTND5P11	mitochondrially encoded NADH:ubiquinone oxidoreductase core subunit 5 pseudogene 11	313.725	130.214	1.26856	0.000104136	1.26861	5	134924648	134926459	1						0
ENSG00000279905	AC063926.3		9.4769	3.93788	1.25248	0.0359537	1.267	12	130425004	130430661		1					0
ENSG00000204442	FAM155A	family with sequence similarity 155 member A	16.4618	6.86167	1.24559	0.00545794	1.26249	13	107163510	107866735							1
ENSG00000130024	PHF10	PHD finger protein 10	20.5553	8.56898	1.28447	0.00150188	1.26231	6	169703905	169725566							1
ENSG00000104756	KCTD9	potassium channel tetramerization domain containing 9	30.2267	12.611	1.26934	7.01145e-05	1.26114	8	25427847	25458476							1
ENSG00000247699	AC008609.1		11.2587	4.70057	1.21548	0.0273278	1.26013	5	160195744	160204826		1					0
ENSG00000142224	IL19	interleukin 19	8.538	3.56611	1.28138	0.0479304	1.25955	1	206798870	206842981							1
ENSG00000274209	ANTXRL	anthrax toxin receptor like	13.1361	5.48843	1.17967	0.0177227	1.25908	10	46286345	46330207							1
ENSG00000223865	HLA-DPB1	major histocompatibility complex, class II, DP beta 1	10.9019	4.55569	1.26523	0.0214258	1.25883	6	33075926	33087201							1
ENSG00000202408	RNU1-122P	RNA, U1 small nuclear 122, pseudogene #or# microRNA 5087 /// RNA, U1 small nuclear 122, pseudogene	39.7939	16.6309	1.25865	4.54655e-05	1.25868	1	148334612	148334767	1						0
ENSG00000203734	ECT2L	epithelial cell transforming 2 like	11.0649	4.62516	1.23217	0.0160141	1.25842	6	138795926	138904070							1
ENSG00000147481	SNTG1	syntrophin gamma 1	9.19878	3.86247	1.21397	0.0354246	1.25192	8	49909789	50796691							1
ENSG00000224614	TNK2-AS1	TNK2 antisense RNA 1	33.8989	14.2525	1.24169	6.9215e-05	1.25002	3	195908076	195911257							1
ENSG00000179873	NLRP11	NLR family pyrin domain containing 11	9.22386	3.88462	1.24473	0.0321048	1.2476	19	55785397	55836800							1
ENSG00000198888	MT-ND1	mitochondrially encoded NADH:ubiquinone oxidoreductase core subunit 1 #or# mitochondrially encoded tRNA isoleucine /// mitochondrially encoded NADH:ubiquinone oxidoreductase core subunit 1 #or# mitochondrially encoded tRNA leucine 1 (UUA/G) /// mitochondrially encoded NADH:ubiquinone oxidoreductase core subunit 1	30861.3	13002	1.24706	1.20766e-05	1.24706	0	3307	4262						1	0
ENSG00000255823	MTRNR2L8	MT-RNR2 like 8	452.047	190.614	1.24525	3.88342e-07	1.24581	11	10507887	10509189							1
ENSG00000215440	NPEPL1	aminopeptidase like 1 /// aminopeptidase like 1 #or# STX16-NPEPL1 readthrough (NMD candidate)	19.9965	8.43371	1.23543	0.00137069	1.24551	20	58689131	58719238							1
ENSG00000259780	AC009065.1		12.5241	5.28963	1.23936	0.0136578	1.24347	16	2235689	2236913		1					0
ENSG00000092295	TGM1	transglutaminase 1	13.056	5.54829	1.17312	0.0184436	1.2346	14	24249114	24264432							1
ENSG00000228570	NUTM2E	NUT family member 2E	12.6603	5.39086	1.13482	0.0345262	1.23173	10	79841358	79850878							1
ENSG00000198176	TFDP1	transcription factor Dp-1	13.2442	5.64585	1.21429	0.0188864	1.2301	13	113584721	113641470							1
ENSG00000137868	STRA6	stimulated by retinoic acid 6	30.8616	13.1564	1.20898	9.899e-05	1.23005	15	74179466	74212267							1
ENSG00000170949	ZNF160	zinc finger protein 160	10.3124	4.39827	1.21859	0.0308193	1.22937	19	53066606	53103436							1
ENSG00000127990	SGCE	sarcoglycan epsilon	27.4597	11.7514	1.21613	0.00027583	1.22448	7	94524204	94656572							1
ENSG00000133874	RNF122	ring finger protein 122	29.0132	12.4381	1.23021	0.000228605	1.22195	8	33547755	33567125							1
ENSG00000275857	AC009133.4		11.3642	4.87355	1.22565	0.0269956	1.22146	16	29804430	29804990		1					0
ENSG00000153395	LPCAT1	lysophosphatidylcholine acyltransferase 1	19.3594	8.30438	1.22628	0.00399581	1.22109	5	1456480	1523977							1
ENSG00000173530	TNFRSF10D	TNF receptor superfamily member 10d	10.5655	4.53354	1.2193	0.0394924	1.22065	8	23135588	23164030							1
ENSG00000280229	AL161658.1		8.13316	3.49069	1.23188	0.0424045	1.2203	20	20363691	20365657		1					0
ENSG00000211459	MT-RNR1	mitochondrially encoded 12S RNA	26584.3	11413	1.21989	3.08018e-05	1.21989	0	648	1601						1	0
ENSG00000184441	AP001062.1		19.891	8.54155	1.15388	0.00355288	1.21954	21	44331234	44335851		1					0
ENSG00000230021	AL669831.3		980.296	421.228	1.21852	2.12755e-06	1.21862	1	586071	827796		1					0
ENSG00000104290	FZD3	frizzled class receptor 3	24.6469	10.5955	1.21379	0.00173979	1.21796	8	28494205	28574268							1
ENSG00000113196	HAND1	heart and neural crest derivatives expressed 1	24.4545	10.526	1.19552	0.00147817	1.21614	5	154474972	154478264							1
ENSG00000132357	CARD6	caspase recruitment domain family member 6	12.4761	5.37164	1.20915	0.013599	1.21573	5	40841184	40860175							1
ENSG00000148935	GAS2	growth arrest specific 2	13.7761	5.9326	1.19577	0.0201455	1.21543	11	22625642	22813055							1
ENSG00000261341	AC010325.1		8.60932	3.70798	1.30644	0.0332925	1.21527	19	50776141	50793142		1					0
ENSG00000188038	NRN1L	neuritin 1 like /// neuritin 1 like #or# NA	11.8771	5.11665	1.19933	0.0256465	1.21491	16	67884805	67888855							1
ENSG00000135269	TES	testin LIM domain protein	20.2824	8.74262	1.18579	0.00277579	1.21409	7	116210493	116258783							1
ENSG00000243978	RTL9	retrotransposon Gag like 9	12.2689	5.28963	1.20537	0.0202352	1.21377	0	110358816	110456334							1
ENSG00000204962	PCDHA8	protocadherin alpha 8	8.27115	3.56611	1.23018	0.0494743	1.21374	5	140841187	141012344							1
ENSG00000273338	AC103591.3		15.3482	6.61923	1.18252	0.00558923	1.21334	1	78004346	78004554		1					0
ENSG00000245729	LINC02226	long intergenic non-protein coding RNA 2226 #or# NA /// long intergenic non-protein coding RNA 2226	10.3699	4.47368	1.21356	0.0233852	1.21287	5	8333481	8457558			1				0
ENSG00000243064	ABCC13	ATP binding cassette subfamily C member 13 (pseudogene)	10.2298	4.41382	1.1828	0.0285857	1.21268	21	14236206	14362754	1						0
ENSG00000145506	NKD2	naked cuticle homolog 2	16.4657	7.10478	1.18999	0.00834994	1.21261	5	1008829	1038943							1
ENSG00000148288	GBGT1	globoside alpha-1,3-N-acetylgalactosaminyltransferase 1 (FORS blood group) #or# NA /// globoside alpha-1,3-N-acetylgalactosaminyltransferase 1 (FORS blood group)	20.9566	9.04492	1.2024	0.00233666	1.21222	9	133152948	133163945							1
ENSG00000115718	PROC	protein C, inactivator of coagulation factors Va and VIIIa	10.149	4.38206	1.23946	0.0342774	1.21165	2	127418427	127429246							1
ENSG00000198910	L1CAM	L1 cell adhesion molecule	26.7721	11.5778	1.19016	0.00108888	1.20937	0	153861514	153886174							1
ENSG00000120616	EPC1	enhancer of polycomb homolog 1	49.68	21.5045	1.22031	2.93858e-06	1.20803	10	32267751	32378798							1
ENSG00000152433	ZNF547	zinc finger protein 547 #or# trafficking protein particle complex 2B #or# NA /// zinc finger protein 547 #or# NA /// zinc finger protein 547 #or# trafficking protein particle complex 2B /// zinc finger protein 547	17.9366	7.76558	1.26365	0.0035373	1.20774	19	57363477	57379565							1
ENSG00000158352	SHROOM4	shroom family member 4	10.2298	4.43597	1.18173	0.0280405	1.20546	0	50591647	50814302							1
ENSG00000109790	KLHL5	kelch like family member 5	8.87403	3.85286	1.23017	0.04932	1.20366	4	39045039	39126857							1
ENSG00000217372	TUBB4BP7	tubulin beta 4B class IVb pseudogene 7	10.7289	4.66287	1.18532	0.0268289	1.20221	6	152898047	152899280	1						0
ENSG00000261949	GFY	golgi associated olfactory signaling regulator	9.06993	3.94448	1.16878	0.0498822	1.20126	19	49423749	49428818							1
ENSG00000185958	FAM186A	family with sequence similarity 186 member A	19.0212	8.27328	1.19079	0.0042576	1.20108	12	50326230	50396622							1
ENSG00000285492	AL356417.3		18.9499	8.24453	1.17139	0.00386401	1.20068	6	159051674	159121495		1					0
ENSG00000185291	IL3RA	interleukin 3 receptor subunit alpha	14.0754	6.13367	1.23734	0.00829889	1.19835	0	1336616	1382689							1
ENSG00000212907	MT-ND4L	mitochondrially encoded NADH:ubiquinone oxidoreductase core subunit 4L /// mitochondrially encoded tRNA arginine #or# mitochondrially encoded NADH:ubiquinone oxidoreductase core subunit 4L	11806.9	5149.97	1.197	3.81992e-05	1.19699	0	10470	10766						1	0
ENSG00000198821	CD247	CD247 molecule	10.9477	4.77598	1.18557	0.020561	1.19676	1	167430640	167518610							1
ENSG00000210077	MT-TV	mitochondrially encoded tRNA valine #or# mitochondrially encoded 16S RNA /// mitochondrially encoded tRNA valine /// mitochondrially encoded tRNA valine #or# mitochondrially encoded 12S RNA	4452.31	1943.4	1.19597	2.56041e-05	1.19597	0	1602	1670						1	0
ENSG00000183770	FOXL2	forkhead box L2	26.3098	11.4862	1.19339	0.000831902	1.1957	3	138944224	138947140							1
ENSG00000250538	AC104407.1		9.3943	4.1019	1.20384	0.0443839	1.19549	4	155206529	155209027		1					0
ENSG00000167766	ZNF83	zinc finger protein 83	16.2988	7.11666	1.20585	0.0152532	1.19549	19	52594060	52690496							1
ENSG00000203690	TCP10	t-complex 10	17.7696	7.76924	1.14879	0.0078719	1.19357	6	167357031	167384510							1
ENSG00000197182	MIRLET7BHG	MIRLET7B host gene #or# PRR34 antisense RNA 1 /// MIRLET7B host gene #or# microRNA let-7b /// MIRLET7B host gene #or# microRNA 4763 /// MIRLET7B host gene #or# microRNA let-7a-3 /// MIRLET7B host gene	51.3831	22.4756	1.17944	8.99407e-06	1.19294	22	46053869	46113928				1			0
ENSG00000123977	DAW1	dynein assembly factor with WD repeats 1	9.47728	4.14922	1.16966	0.0477841	1.19163	2	227871054	227924344							1
ENSG00000272602	ZNF595	zinc finger protein 595	20.227	8.85574	1.19168	0.0059377	1.1916	4	53285	88211							1
ENSG00000169302	STK32A	serine/threonine kinase 32A	13.1482	5.75897	1.16137	0.0233944	1.19098	5	147234963	147387852							1
ENSG00000235370	DNM1P51	dynamin 1 pseudogene 51 #or# chondroitin sulfate proteoglycan 4 pseudogene 5 /// dynamin 1 pseudogene 51	16.7312	7.33101	1.18532	0.00467882	1.19046	15	84398316	84411701	1						0
ENSG00000231132	AC022537.1		12.8118	5.61409	1.17916	0.0216898	1.19034	10	51244894	51245806		1					0
ENSG00000228526	MIR34AHG	MIR34A host gene	34.882	15.2983	1.20853	9.66191e-05	1.18911	1	9148011	9198906				1			0
ENSG00000275993	SIK1B	salt inducible kinase 1B (putative)	10.8578	4.76344	1.15289	0.037742	1.18865	21	6111134	6123739							1
ENSG00000123124	WWP1	WW domain containing E3 ubiquitin protein ligase 1	9.32726	4.09596	1.16405	0.0366173	1.18725	8	86342738	86478420							1
ENSG00000225110	PNMA6F	PNMA family member 6F	10.4391	4.5868	1.20562	0.0266873	1.18644	0	153317681	153321822							1
ENSG00000150403	TMCO3	transmembrane and coiled-coil domains 3	55.3152	24.3151	1.20276	1.47783e-06	1.18582	13	113490995	113554590							1
ENSG00000283597	FAM169B	family with sequence similarity 169 member B	14.9088	6.55937	1.15879	0.0197027	1.18453	15	98437162	98547728							1
ENSG00000225684	FAM225B	family with sequence similarity 225 member B (non-protein coding)	11.1895	4.92747	1.12955	0.0262786	1.18323	9	113103338	113111500							1
ENSG00000167978	SRRM2	serine/arginine repetitive matrix 2	103.62	45.6598	1.18545	4.77267e-11	1.18231	16	2752329	2772538							1
ENSG00000166401	SERPINB8	serpin family B member 8 /// serpin family B member 8 #or# histocompatibility minor serpin domain containing	20.2863	8.94076	1.1716	0.0056478	1.18203	18	63969925	64019779							1
ENSG00000134897	BIVM	basic, immunoglobulin-like variable motif containing /// basic, immunoglobulin-like variable motif containing #or# BIVM-ERCC5 readthrough /// basic, immunoglobulin-like variable motif containing #or# ERCC excision repair 5, endonuclease #or# BIVM-ERCC5 readthrough	68.5741	30.2285	1.19486	1.4268e-07	1.18175	13	102799049	102841535							1
ENSG00000154328	NEIL2	nei like DNA glycosylase 2	35.7404	15.7743	1.20023	4.86429e-05	1.17998	8	11769639	11787346							1
ENSG00000134905	CARS2	cysteinyl-tRNA synthetase 2, mitochondrial	159.316	70.3394	1.18894	1.95888e-14	1.17948	13	110641412	110713603							1
ENSG00000173258	ZNF483	zinc finger protein 483	11.0879	4.8957	1.20639	0.0309939	1.17939	9	111525159	111577844							1
ENSG00000151849	CENPJ	centromere protein J	16.8667	7.45073	1.16618	0.00726272	1.17872	13	24882284	24922889							1
ENSG00000105523	FAM83E	family with sequence similarity 83 member E	37.363	16.5274	1.16181	6.16119e-05	1.17675	19	48600810	48614854							1
ENSG00000179921	GPBAR1	G protein-coupled bile acid receptor 1	22.8457	10.1159	1.19646	0.00224599	1.1753	2	218259496	218263859							1
ENSG00000178199	ZC3H12D	zinc finger CCCH-type containing 12D	22.7401	10.0818	1.1302	0.00160332	1.17348	6	149446795	149485061							1
ENSG00000122692	SMU1	SMU1, DNA replication regulator and spliceosomal factor	44.8471	19.8954	1.16912	1.12829e-05	1.17258	9	33041764	33076659							1
ENSG00000228672	PROB1	proline rich basic protein 1	17.8289	7.91046	1.18791	0.00516016	1.17238	5	139390592	139395713							1
ENSG00000069869	NEDD4	neural precursor cell expressed, developmentally down-regulated 4, E3 ubiquitin protein ligase	22.9887	10.2015	1.17131	0.00336425	1.17214	15	55826922	55993746							1
ENSG00000177721	ANXA2R	annexin A2 receptor	62.1846	27.6107	1.1578	1.6878e-06	1.17133	5	43039081	43043170							1
ENSG00000112365	MICAL1	microtubule associated monooxygenase, calponin and LIM domain containing 1 /// zinc finger and BTB domain containing 24 #or# microtubule associated monooxygenase, calponin and LIM domain containing 1	50.1522	22.2774	1.15336	8.2264e-06	1.17073	6	109462594	109483237							1
ENSG00000145113	MUC4	mucin 4, cell surface associated	36.1936	16.0802	1.16381	4.88063e-05	1.17045	3	195746765	195812277							1
ENSG00000197915	HRNR	hornerin	30.0078	13.342	1.1986	0.000193999	1.16937	1	152212082	152224193							1
ENSG00000166825	ANPEP	alanyl aminopeptidase, membrane	21.8263	9.719	1.15083	0.0043943	1.16719	15	89784889	89815401							1
ENSG00000229425	AJ009632.2		12.5566	5.59193	1.14589	0.0249141	1.16702	21	15370500	15627342		1					0
ENSG00000201801	RNU5E-4P	RNA, U5E small nuclear 4, pseudogene	11.1359	4.97111	1.2281	0.0199982	1.16358	1	11909808	11909927	1						0
ENSG00000176641	RNF152	ring finger protein 152	16.0129	7.15803	1.1344	0.00777763	1.1616	18	61808063	61894247							1
ENSG00000265763	ZNF488	zinc finger protein 488	12.3148	5.50992	1.13798	0.0243178	1.16029	10	47365496	47384273							1
ENSG00000183337	BCOR	BCL6 corepressor	44.5322	19.9893	1.17696	1.20547e-05	1.15562	0	40049815	40177329							1
ENSG00000092853	CLSPN	claspin	33.0249	14.8704	1.13191	0.000445805	1.15112	1	35720218	35769967							1
ENSG00000164776	PHKG1	phosphorylase kinase catalytic subunit gamma 1	16.0432	7.23939	1.13421	0.0169241	1.14802	7	56080283	56092996							1
ENSG00000181827	RFX7	regulatory factor X7	11.6678	5.26748	1.15048	0.0237805	1.14735	15	56087280	56243266							1
ENSG00000233766	AC098617.1		10.101	4.5653	1.06945	0.0388609	1.14571	2	191846539	192044525		1					0
ENSG00000226686	LINC01535	long intergenic non-protein coding RNA 1535	13.7299	6.21275	1.12695	0.0198411	1.14401	19	37251912	37265535			1				0
ENSG00000186094	AGBL4	ATP/GTP binding protein like 4	11.6544	5.27408	1.12859	0.0280534	1.14388	1	48532855	50023913							1
ENSG00000164190	NIPBL	NIPBL, cohesin loading factor	40.6058	18.4024	1.11199	5.92231e-05	1.14179	5	36876759	37066413							1
ENSG00000235535	TRDN-AS1	TRDN antisense RNA 1	9.89592	4.48622	1.21829	0.0313301	1.14133	6	123389421	123510241							1
ENSG00000241211	IQCJ-SCHIP1-AS1	IQCJ-SCHIP1 readthrough antisense RNA 1	16.1487	7.33101	1.1095	0.00799598	1.13934	3	159765387	159768612							1
ENSG00000114554	PLXNA1	plexin A1	47.7926	21.7003	1.15247	7.66933e-06	1.13908	3	126988594	127037392							1
ENSG00000188229	TUBB4B	tubulin beta 4B class IVb	62.173	28.2309	1.14999	8.24251e-07	1.13901	9	137241213	137243707							1
ENSG00000178386	ZNF223	zinc finger protein 223 /// zinc finger protein 223 #or# NA	13.5551	6.16544	1.1457	0.0148417	1.13656	19	44051367	44067991							1
ENSG00000259135	AL445363.2		13.1249	5.97031	1.09896	0.0256085	1.13642	14	34556774	34561298		1					0
ENSG00000144285	SCN1A	sodium voltage-gated channel alpha subunit 1	15.8149	7.21195	1.07073	0.0123226	1.13282	2	165984641	166149214							1
ENSG00000279601	AC005052.1		18.0404	8.22897	1.14177	0.0075617	1.13244	0	119693568	119696059		1					0
ENSG00000112697	TMEM30A	transmembrane protein 30A	87.0292	39.7052	1.11869	3.50689e-09	1.13217	6	75252924	75284968							1
ENSG00000165392	WRN	Werner syndrome RecQ like helicase	21.4098	9.76925	1.15017	0.00230941	1.13195	8	31033801	31173769							1
ENSG00000184574	LPAR5	lysophosphatidic acid receptor 5	13.0119	5.93855	1.15617	0.0278226	1.13165	12	6618835	6636447							1
ENSG00000102053	ZC3H12B	zinc finger CCCH-type containing 12B	13.9928	6.39233	1.1089	0.0213158	1.13027	0	65366638	65507887							1
ENSG00000232677	LINC00665	long intergenic non-protein coding RNA 665	12.3035	5.6237	1.0862	0.0331756	1.12948	19	36313067	36331718			1				0
ENSG00000168490	PHYHIP	phytanoyl-CoA 2-hydroxylase interacting protein	12.9869	5.93855	1.13761	0.0244756	1.12887	8	22219704	22232341							1
ENSG00000270487	AL355297.2		16.7749	7.67168	1.08525	0.0139368	1.12869	6	156780327	156780455		1					0
ENSG00000231672	DIRC3	disrupted in renal carcinoma 3	10.9866	5.02503	1.16321	0.0270576	1.12854	2	217284019	217756593							1
ENSG00000258588	TRIM6-TRIM34	tripartite motif containing 6 #or# TRIM6-TRIM34 readthrough /// TRIM6-TRIM34 readthrough #or# tripartite motif containing 34	7.76254	3.55055	1.16395	0.0475327	1.12848	11	5596725	5644398							1
ENSG00000125266	EFNB2	ephrin B2	27.6825	12.6775	1.15344	0.00349603	1.1267	13	106489731	106535662							1
ENSG00000213995	NAXD	NAD(P)HX dehydratase	24.3624	11.1587	1.1395	0.00165744	1.12649	13	110615460	110639993							1
ENSG00000219565	ZNF259P1	zinc finger protein 259 pseudogene 1	23.0303	10.5571	1.107	0.00271736	1.12532	6	108782126	108787053	1						0
ENSG00000185313	SCN10A	sodium voltage-gated channel alpha subunit 10	10.8418	4.97111	1.13578	0.0320368	1.12497	3	38696807	38816217							1
ENSG00000160323	ADAMTS13	ADAM metallopeptidase with thrombospondin type 1 motif 13	26.3786	12.098	1.10674	0.00152192	1.12459	9	133414358	133459402							1
ENSG00000166763	STRCP1	stereocilin pseudogene 1	11.401	5.22977	1.11627	0.032467	1.12434	15	43699488	43718184	1						0
ENSG00000202257	RNA5S16	RNA, 5S ribosomal 16	16.3581	7.50464	1.09026	0.00801827	1.12415	1	228643809	228643927							1
ENSG00000163053	SLC16A14	solute carrier family 16 member 14	32.1772	14.7691	1.16569	0.000319062	1.12346	2	230034974	230068999							1
ENSG00000155324	GRAMD2B	GRAM domain containing 2B #or# NA /// GRAM domain containing 2B	15.7552	7.23345	1.08477	0.0138271	1.12307	5	126360132	126496494							1
ENSG00000261824	LINC00662	long intergenic non-protein coding RNA 662	51.8757	23.8399	1.10914	1.45082e-05	1.12168	19	27684580	27793940			1				0
ENSG00000084674	APOB	apolipoprotein B	14.3976	6.61923	1.08818	0.0178181	1.1211	2	21001429	21044073							1
ENSG00000185989	RASA3	RAS p21 protein activator 3	20.0562	9.23411	1.12221	0.00552181	1.119	13	113977783	114132611							1
ENSG00000164756	SLC30A8	solute carrier family 30 member 8	11.3088	5.20762	1.11245	0.0234624	1.11876	8	116950273	117176714							1
ENSG00000187821	HELT	helt bHLH transcription factor	20.2062	9.30952	1.12336	0.00549085	1.11802	4	185018841	185020804							1
ENSG00000113649	TCERG1	transcription elongation regulator 1 #or# NA /// transcription elongation regulator 1	28.0072	12.9133	1.15161	0.000438971	1.11694	5	146447311	146511961							1
ENSG00000184408	KCND2	potassium voltage-gated channel subfamily D member 2	13.5686	6.25706	1.11712	0.0197654	1.11671	7	120273668	120750331							1
ENSG00000254166	CASC19	cancer susceptibility 19 (non-protein coding)	24.8065	11.4647	1.10266	0.00170782	1.11352	8	127072694	127227541							1
ENSG00000168487	BMP1	bone morphogenetic protein 1	35.1336	16.2532	1.09498	0.000320071	1.11213	8	22164736	22212326							1
ENSG00000274333	CU633967.1		11.2284	5.19801	1.15356	0.0407095	1.11112	21	5553637	5614880		1					0
ENSG00000162992	NEUROD1	neuronal differentiation 1	10.8881	5.04058	1.07799	0.0396091	1.11109	2	181673088	181680876							1
ENSG00000253438	PCAT1	POU class 5 homeobox 1B #or# prostate cancer associated transcript 1 (non-protein coding) /// prostate cancer associated transcript 1 (non-protein coding)	45.5866	21.18	1.10528	3.79017e-05	1.1059	8	126556323	127419050							1
ENSG00000112541	PDE10A	phosphodiesterase 10A	50.4057	23.4215	1.06772	2.51935e-05	1.10575	6	165327287	165986603							1
ENSG00000263006	ROCK1P1	Rho associated coiled-coil containing protein kinase 1 pseudogene 1	69.6916	32.4112	1.09184	2.68368e-06	1.10449	18	109065	122219	1						0
ENSG00000224790	AP000704.1		17.2875	8.04573	1.14859	0.0147931	1.10343	21	36966492	36975164		1					0
ENSG00000272267	AC021242.3		44.4288	20.6826	1.0951	9.94491e-05	1.10308	8	9555144	9556520		1					0
ENSG00000115339	GALNT3	polypeptide N-acetylgalactosaminyltransferase 3	26.0006	12.1136	1.10577	0.00129371	1.10192	2	165747591	165794682							1
ENSG00000260035	AC051619.8		24.3762	11.3575	1.09655	0.00189619	1.10183	15	45200325	45200632		1					0
ENSG00000143217	NECTIN4	nectin cell adhesion molecule 4	13.9967	6.52166	1.09719	0.017054	1.10178	1	161070995	161089599							1
ENSG00000236140	AC245014.1		30.0537	14.0035	1.09782	0.000456947	1.10176	1	145286610	145287755		1					0
ENSG00000145416	MARCH1	membrane associated ring-CH-type finger 1	10.8924	5.07829	1.12717	0.0308908	1.1009	4	163524298	164384050							1
ENSG00000009790	TRAF3IP3	TRAF3 interacting protein 3	11.0515	5.15436	1.05388	0.0398301	1.10038	1	209756032	209782320							1
ENSG00000109927	TECTA	tectorin alpha #or# NA /// tectorin alpha	11.0857	5.17585	1.1029	0.0332338	1.09884	11	121101173	121191493							1
ENSG00000118596	SLC16A7	solute carrier family 16 member 7	34.481	16.1179	1.10105	0.000250966	1.09714	12	59596067	59789855							1
ENSG00000237693	IRGM	immunity related GTPase M	9.48856	4.43597	1.07747	0.0436183	1.09694	5	150846523	150900736							1
ENSG00000283167	AC140479.7		12.0825	5.65179	1.09285	0.0215437	1.09614	2	110321402	110348941		1					0
ENSG00000278291	AL161772.1		12.1284	5.67395	1.09394	0.0240238	1.09597	13	20699307	20703718		1					0
ENSG00000026036	RTEL1-TNFRSF6B	RTEL1-TNFRSF6B readthrough (NMD candidate) #or# TNF receptor superfamily member 6b /// RTEL1-TNFRSF6B readthrough (NMD candidate) /// RTEL1-TNFRSF6B readthrough (NMD candidate) #or# regulator of telomere elongation helicase 1	65.9646	30.8709	1.08215	3.00148e-06	1.09544	20	63659300	63698684							1
ENSG00000162999	DUSP19	dual specificity phosphatase 19	32.8524	15.3943	1.04694	0.000857412	1.0936	2	183078559	183100005							1
ENSG00000277075	HIST1H2AE	histone cluster 1 H2A family member e	12.858	6.03017	1.05991	0.0306692	1.0924	6	26216975	26217483							1
ENSG00000107223	EDF1	endothelial differentiation related factor 1	18.9888	8.90965	1.07828	0.00851229	1.09171	9	136862119	136866286							1
ENSG00000139304	PTPRQ	protein tyrosine phosphatase, receptor type Q	12.3628	5.80922	1.14348	0.0177072	1.08959	12	80402178	80680271							1
ENSG00000186448	ZNF197	zinc finger protein 197	19.3477	9.09224	1.06529	0.00765875	1.08946	3	44584888	44648471							1
ENSG00000202515	VTRNA1-3	vault RNA 1-3	21.8055	10.2548	1.0862	0.00217905	1.08839	5	140726158	140726246							1
ENSG00000102001	CACNA1F	calcium voltage-gated channel subunit alpha1 F	20.0406	9.43357	1.02024	0.0175305	1.08705	0	49205063	49233371							1
ENSG00000200972	RNU5A-8P	RNA, U5A small nuclear 8, pseudogene	14.494	6.82397	1.07871	0.0176089	1.08678	1	210374154	210374267	1						0
ENSG00000235703	LINC00894	long intergenic non-protein coding RNA 894	62.9852	29.6587	1.07148	1.60428e-06	1.08656	0	149938628	150224580			1				0
ENSG00000153487	ING1	inhibitor of growth family member 1	196.646	92.6434	1.07725	5.99117e-14	1.08584	13	110712736	110723339							1
ENSG00000248441	LINC01197	long intergenic non-protein coding RNA 1197	12.7775	6.02357	1.05193	0.0246509	1.08492	15	95209099	95327129			1				0
ENSG00000197894	ADH5	alcohol dehydrogenase 5 (class III), chi polypeptide	13.9254	6.56531	1.11114	0.0155191	1.08478	4	99070978	99088801							1
ENSG00000146215	CRIP3	cysteine rich protein 3	11.8888	5.60815	1.06574	0.0413811	1.08401	6	43299710	43308797							1
ENSG00000231475	IGHV4-31	immunoglobulin heavy variable 4-31	12.1189	5.72126	1.06553	0.0303561	1.08285	14	106349283	106349792							1
ENSG00000200156	RNU5B-1	RNA, U5B small nuclear 1	26.8088	12.659	1.05336	0.00144043	1.08255	15	65304677	65304792							1
ENSG00000075240	GRAMD4	GRAM domain containing 4	20.3096	9.61843	1.08482	0.00516646	1.07829	22	46576012	46679790							1
ENSG00000142319	SLC6A3	solute carrier family 6 member 3	21.863	10.3583	1.10599	0.00437869	1.07771	5	1392790	1445430							1
ENSG00000163810	TGM4	transglutaminase 4	15.9783	7.57045	1.11159	0.00817688	1.07766	3	44874608	44914990							1
ENSG00000227627	AL080276.2		41.8162	19.817	1.0582	0.000177475	1.07732	6	152983331	152990541		1					0
ENSG00000249201	AC114291.1		17.53	8.31033	1.11737	0.0112892	1.07685	5	1173141	1178605		1					0
ENSG00000126216	TUBGCP3	tubulin gamma complex associated protein 3	34.9836	16.5939	1.05397	0.000931316	1.07603	13	112485005	112588167							1
ENSG00000182584	ACTL10	actin like 10	28.0838	13.3235	1.06119	0.00194181	1.07577	20	33666498	33668525							1
ENSG00000182168	UNC5C	unc-5 netrin receptor C	33.9569	16.112	1.05118	0.000280377	1.07557	4	95162504	95549206							1
ENSG00000168405	CMAHP	cytidine monophospho-N-acetylneuraminic acid hydroxylase, pseudogene	12.3265	5.85059	1.02055	0.031614	1.0751	6	25061626	25452263	1						0
ENSG00000219545	UMAD1	UBAP1-MVB12-associated (UMA) domain containing 1	10.773	5.11599	1.06499	0.0482625	1.07434	7	7640711	7968020							1
ENSG00000231806	PCAT7	prostate cancer associated transcript 7 (non-protein coding)	10.6597	5.06274	1.08968	0.040995	1.07418	9	94555054	94603990							1
ENSG00000134899	ERCC5	ERCC excision repair 5, endonuclease	69.1198	32.859	1.08637	2.13561e-07	1.07281	13	102807146	102876001							1
ENSG00000284977	AL160272.1		13.8453	6.59047	1.06438	0.0229908	1.07094	9	117759455	117879988		1					0
ENSG00000130227	XPO7	exportin 7	12.4782	5.94449	1.13081	0.0294522	1.06979	8	21919671	22006585							1
ENSG00000111816	FRK	fyn related Src family tyrosine kinase	16.1742	7.70938	1.03972	0.0130351	1.06901	6	115931149	116060758							1
ENSG00000145592	RPL37	ribosomal protein L37	107.442	51.2201	1.05949	5.57378e-10	1.06878	5	40825262	40835335							1
ENSG00000173193	PARP14	poly(ADP-ribose) polymerase family member 14	10.2757	4.90531	1.02614	0.0482412	1.06682	3	122680618	122730840							1
ENSG00000183117	CSMD1	CUB and Sushi multiple domains 1	15.2448	7.2933	1.02306	0.0168132	1.06367	8	2935353	4994972							1
ENSG00000224078	SNHG14	small nucleolar RNA host gene 14 /// small nucleolar RNA host gene 14 #or# NA /// small nucleolar RNA, C/D box 115-31 #or# small nucleolar RNA host gene 14 /// small nuclear ribonucleoprotein polypeptide N #or# small nucleolar RNA host gene 14 /// small nucleolar RNA host gene 14 #or# small nucleolar RNA, C/D box 116-4 /// small nucleolar RNA, C/D box 115-44 #or# small nucleolar RNA host gene 14 …	24.2862	11.6214	1.08866	0.00428402	1.06335	15	24978583	25419462							1
ENSG00000260273	AL359711.2		62.4921	29.9233	1.05759	1.77175e-06	1.06241	6	109382795	109383666		1					0
ENSG00000153233	PTPRR	protein tyrosine phosphatase, receptor type R	15.5229	7.43518	1.04697	0.0172505	1.06196	12	70638073	70920843							1
ENSG00000146285	SCML4	Scm polycomb group protein like 4	17.7368	8.49951	1.08572	0.00871059	1.06129	6	107704104	107824317							1
ENSG00000261467	AC099398.1		11.1571	5.34949	1.06852	0.0462507	1.06048	7	73985992	73988767		1					0
ENSG00000112406	HECA	hdc homolog, cell cycle regulator	15.2349	7.30585	1.07928	0.0130976	1.06026	6	139135112	139180802							1
ENSG00000114503	NCBP2	nuclear cap binding protein subunit 2	32.1041	15.4055	1.07907	0.000288522	1.05931	3	196935402	196942597							1
ENSG00000188818	ZDHHC11	bromodomain containing 9 #or# zinc finger DHHC-type containing 11 /// zinc finger DHHC-type containing 11	23.4048	11.2718	1.0935	0.00389307	1.05408	5	795606	850986							1
ENSG00000221818	EBF2	early B cell factor 2	25.4834	12.274	1.07687	0.00309292	1.05396	8	25841730	26045397							1
ENSG00000228113	AC003991.1		10.0664	4.8514	1.04438	0.0482651	1.05307	7	88219359	88304367		1					0
ENSG00000233452	STXBP5-AS1	STXBP5 antisense RNA 1	21.4673	10.3524	1.04604	0.0042321	1.05218	6	146841901	147204614							1
ENSG00000273154	AL121845.3	NA /// Lck interacting transmembrane adaptor 1 #or# NA	17.6655	8.52233	1.04056	0.0223237	1.05161	20	63708864	63739103							1
ENSG00000198010	DLGAP2	DLG associated protein 2	15.6267	7.54169	1.04286	0.0218592	1.05105	8	737596	1708474							1
ENSG00000206596	RNU1-27P	RNA, U1 small nuclear 27, pseudogene	55.8826	26.9738	1.02287	2.39514e-05	1.05084	14	34546714	34546877	1						0
ENSG00000121879	PIK3CA	phosphatidylinositol-4,5-bisphosphate 3-kinase catalytic subunit alpha	19.4719	9.4167	1.01126	0.0112815	1.0481	3	179148114	179240093							1
ENSG00000277586	NEFL	neurofilament light	62.8853	30.4148	1.04207	1.66458e-05	1.04795	8	24950955	24957110							1
ENSG00000157426	AASDH	aminoadipate-semialdehyde dehydrogenase	39.7568	19.2399	1.02257	0.000207105	1.0471	4	56338287	56387508							1
ENSG00000153303	FRMD1	FERM domain containing 1	42.3777	20.5149	1.05289	0.0001817	1.04663	6	168053166	168101511							1
ENSG00000075539	FRYL	FRY like transcription coactivator	63.041	30.5183	1.06047	4.18868e-06	1.04662	4	48497361	48780322							1
ENSG00000162692	VCAM1	vascular cell adhesion molecule 1	11.9809	5.80922	1.10482	0.0196531	1.04432	1	100719742	100739045							1
ENSG00000250929	LINC01181	long intergenic non-protein coding RNA 1181	14.9473	7.26154	1.06941	0.0151469	1.04154	8	103121032	103132966			1				0
ENSG00000249492	AC114956.3		24.8177	12.0603	1.03682	0.00293999	1.0411	5	43483959	43509356		1					0
ENSG00000169418	NPR1	natriuretic peptide receptor 1	32.4034	15.7647	1.02412	0.00193463	1.03945	1	153678637	153693992							1
ENSG00000106868	SUSD1	sushi domain containing 1	15.0281	7.31179	1.10785	0.0131656	1.03937	9	112040785	112175408							1
ENSG00000065308	TRAM2	translocation associated membrane protein 2	29.4872	14.3604	1.01338	0.00190381	1.038	6	52497402	52576915							1
ENSG00000186019	AC021092.1		13.6222	6.63478	1.01222	0.0334964	1.03784	19	44105463	44113145		1					0
ENSG00000204967	PCDHA4	protocadherin alpha 4	13.0119	6.34803	1.04147	0.0378539	1.03546	5	140806929	141012344							1
ENSG00000120889	TNFRSF10B	TNF receptor superfamily member 10b	28.3806	13.849	1.03799	0.00265442	1.03512	8	23020133	23069179							1
ENSG00000163874	ZC3H12A	zinc finger CCCH-type containing 12A /// zinc finger CCCH-type containing 12A #or# microRNA 6732	19.3936	9.47656	1.01998	0.0101639	1.03315	1	37474552	37484379							1
ENSG00000262202	AC007952.4	NA #or# small nucleolar RNA, C/D box 3D /// NA /// NA #or# small nucleolar RNA, C/D box 3D #or# small nucleolar RNA, C/D box 3D	164.42	80.3651	1.02698	3.30107e-11	1.03275	17	19112000	19112636							1
ENSG00000101306	MYLK2	myosin light chain kinase 2	11.8058	5.77151	1.07003	0.0305483	1.03248	20	31819308	31834689							1
ENSG00000112297	CRYBG1	crystallin beta-gamma domain containing 1	24.3048	11.8867	1.01745	0.0039675	1.0319	6	106360808	106571978							1
ENSG00000130340	SNX9	sorting nexin 9	24.0652	11.7699	1.06912	0.00375523	1.03185	6	157700387	157945077							1
ENSG00000119396	RAB14	RAB14, member RAS oncogene family	36.3454	17.7845	1.05062	0.000327073	1.03115	9	121178137	121223014							1
ENSG00000130653	PNPLA7	patatin like phospholipase domain containing 7	48.5522	23.7668	1.01746	0.000106237	1.03059	9	137459953	137550534							1
ENSG00000101216	GMEB2	glucocorticoid modulatory element binding protein 2	15.1177	7.40341	1.04883	0.0201978	1.02998	20	63587602	63627041							1
ENSG00000198563	DDX39B	DExD-box helicase 39B	26.6341	13.0433	1.00642	0.00255234	1.02996	6	31530219	31542448							1
ENSG00000114867	EIF4G1	eukaryotic translation initiation factor 4 gamma 1 #or# small nucleolar RNA, C/D box 66 /// eukaryotic translation initiation factor 4 gamma 1	69.907	34.236	1.01291	2.48283e-06	1.02992	3	184314495	184335358							1
ENSG00000137090	DMRT1	doublesex and mab-3 related transcription factor 1	11.6445	5.71165	1.06369	0.0365826	1.02767	9	841690	969090							1
ENSG00000119900	OGFRL1	opioid growth factor receptor like 1	18.6549	9.1521	1.02523	0.00973805	1.02738	6	71288803	71308950							1
ENSG00000251669	FAM86EP	family with sequence similarity 86 member E, pseudogene	16.5518	8.1218	1.0132	0.015691	1.02712	4	3941760	3955419	1						0
ENSG00000231889	TRAF3IP2-AS1	TRAF3IP2 antisense RNA 1	90.3139	44.3627	1.02676	3.43193e-07	1.0256	6	111483511	111598302							1
ENSG00000118898	PPL	periplakin	22.6505	11.1366	1.04553	0.0067021	1.02424	16	4882507	4960741							1
ENSG00000204388	HSPA1B	heat shock protein family A (Hsp70) member 1B	69.2437	34.1413	1.00993	9.25712e-07	1.02016	6	31827735	31830255							1
ENSG00000198382	UVRAG	UV radiation resistance associated	40.4794	19.9894	1.00519	0.000427596	1.01796	11	75815167	76143195							1
ENSG00000234352	AC009264.1		18.0499	8.91559	1.02939	0.011974	1.01759	7	136685559	137182107		1					0
ENSG00000215196	BASP1-AS1	BASP1 antisense RNA 1	23.8905	11.801	1.05334	0.00308983	1.01752	5	17130028	17217047							1
ENSG00000169976	SF3B5	splicing factor 3b subunit 5	47.4982	23.4674	1.02476	4.02933e-05	1.01721	6	144094881	144095573							1
ENSG00000196159	FAT4	FAT atypical cadherin 4	24.5142	12.1136	1.00356	0.00353733	1.01699	4	125316399	125492932							1
ENSG00000160360	GPSM1	G protein signaling modulator 1	37.7933	18.6951	1.01048	0.000341879	1.01547	9	136327476	136359605							1
ENSG00000277443	MARCKS	myristoylated alanine rich protein kinase C substrate	43.8277	21.6877	1.00813	0.000116235	1.01496	6	113857362	113863471							1
ENSG00000113569	NUP155	nucleoporin 155	47.0012	23.2693	1.02856	4.04957e-05	1.01427	5	37288137	37371181							1
ENSG00000142686	C1orf216	chromosome 1 open reading frame 216	32.611	16.146	1.01644	0.000956561	1.01418	1	35713875	35719472							1
ENSG00000213903	LTB4R	leukotriene B4 receptor	15.9896	7.92007	1.01913	0.0179765	1.01355	14	24311450	24318036							1
ENSG00000284976	BX255925.3		24.0384	11.9089	1.00191	0.00986064	1.01331	9	137217452	137219361		1					0
ENSG00000135333	EPHA7	EPH receptor A7	36.6931	18.197	1.00944	0.000476976	1.01181	6	93240020	93419547							1
ENSG00000104960	PTOV1	prostate tumor overexpressed 1 /// prostate tumor overexpressed 1 #or# microRNA 4749	76.0226	37.7391	1.01888	3.21939e-06	1.01037	19	49850735	49860744							1
ENSG00000043355	ZIC2	Zic family member 2	45.6035	22.6581	1.02954	0.000172377	1.00912	13	99981772	99986773							1
ENSG00000186377	CYP4X1	cytochrome P450 family 4 subfamily X member 1	11.4356	5.6895	1.03044	0.0471915	1.00715	1	47023568	47050751							1
ENSG00000222724	RNU2-63P	RNA, U2 small nuclear 63, pseudogene	14.9914	7.47288	1.00464	0.0208005	1.0044	2	88016354	88016547	1						0
ENSG00000142961	MOB3C	MAP kinase interacting serine/threonine kinase 1 #or# MOB kinase activator 3C /// MOB kinase activator 3C	19.4169	9.69384	1.01114	0.00897347	1.00218	1	46607715	46616891							1
ENSG00000284747	AL034417.4		14.1368	7.05981	1.00398	0.0488944	1.00176	1	7991134	8005312		1					0
ENSG00000038382	TRIO	trio Rho guanine nucleotide exchange factor	40.1469	20.0558	1.00437	0.000186208	1.00127	5	14143702	14532128							1
ENSG00000110665	C11orf21	chromosome 11 open reading frame 21	11.2743	5.63624	1.02885	0.0424692	1.00023	11	2295645	2303049							1
ENSG00000126012	KDM5C	lysine demethylase 5C	42.2768	21.1423	1.00807	0.000138508	0.999733	0	53191321	53225422							1
ENSG00000171790	SLFNL1	schlafen like 1	46.9688	23.4926	1.00498	0.000154444	0.999497	1	41015597	41023237							1
ENSG00000269113	TRABD2B	NA #or# TraB domain containing 2B /// TraB domain containing 2B	14.3561	7.18613	1.01297	0.0220523	0.998373	1	47760528	47996895							1
ENSG00000125531	FNDC11	fibronectin type III domain containing 11	25.2805	12.6709	1.01435	0.00304539	0.996506	20	63547891	63556708							1
ENSG00000275620	AL121827.2		23.5086	11.8328	1.00941	0.00376667	0.990398	20	63253978	63261615		1					0
ENSG00000282836	AC068544.1		13.1249	6.64072	1.00402	0.0398377	0.98289	2	196638422	196639497		1					0
ENSG00000139842	CUL4A	cullin 4A	46.2643	23.4674	1.00118	0.000113133	0.979239	13	113208193	113267108							1
ENSG00000177994	C2orf73	chromosome 2 open reading frame 73	15.6557	7.94882	1.00712	0.0188804	0.977874	2	54330034	54383742							1
ENSG00000185896	LAMP1	lysosomal associated membrane protein 1	20.0657	10.1913	1.00736	0.0101662	0.977396	13	113297241	113323672							1
ENSG00000141582	CBX4	chromobox 4	26.6017	13.5215	1.01049	0.00750595	0.976258	17	79833156	79839429							1
ENSG00000113494	PRLR	prolactin receptor	16.8	8.69464	1.00607	0.0187002	0.950264	5	35048756	35230589							1
ENSG00000235736	AL031275.1		2.08499	0	3.8003	0.0396233	?	1	168763365	168774490		1					0
ENSG00000233620	AC093581.1		2.09665	0	3.80971	0.0467838	?	1	216072465	216086917		1					0
ENSG00000253515	AC018682.2		4.26424	0	4.86826	0.000387929	?	2	46499731	46501278		1					0
ENSG00000234285	GAPDHP49	glyceraldehyde 3 phosphate dehydrogenase pseudogene 49	2.00453	0	3.76424	0.0316405	?	2	222503883	222504843	1						0
ENSG00000116031	CD207	CD207 molecule	2.94343	0	4.32898	0.00659562	?	2	70830214	70835822							1
ENSG00000236502	SIX3-AS1	SIX3 antisense RNA 1	4.61193	0	4.97539	0.000442203	?	2	44940154	44941873							1
ENSG00000241018	RCC2P5	regulator of chromosome condensation 2 pseudogene 5	2.90884	0	4.32236	0.00446981	?	3	96753185	96754671	1						0
ENSG00000261292	AC110491.1		2.36349	0	3.99557	0.0140553	?	3	97759523	97761532		1					0
ENSG00000282855	AC093591.3		2.2463	0	3.88018	0.0345446	?	4	127809170	127809477		1					0
ENSG00000171560	FGA	fibrinogen alpha chain	2.28303	0	3.97774	0.00714505	?	4	154583126	154590766							1
ENSG00000251377	AC079340.2		2.23678	0	3.94317	0.0205132	?	4	152207421	152225870		1					0
ENSG00000250426	FTLP10	ferritin light chain pseudogene 10	2.11958	0	3.81128	0.0210072	?	4	68182292	68212470	1						0
ENSG00000251253	MTHFD2P4	methylenetetrahydrofolate dehydrogenase (NADP+ dependent) 2, methenyltetrahydrofolate cyclohydrolase pseudogene 4	2.15418	0	3.82992	0.0250293	?	4	162322188	162323907	1						0
ENSG00000250332	AC010460.3		3.03341	0	4.28601	0.00473905	?	5	23303565	23305143		1					0
ENSG00000271043	MTRNR2L2	MT-RNR2 like 2	2.71118	0	4.19404	0.00909208	?	5	80650000	80650086							1
ENSG00000183654	MARCH11	membrane associated ring-CH-type finger 11	2.3289	0	3.98191	0.0144231	?	5	16067139	16180762							1
ENSG00000244073	RPS4XP6	ribosomal protein S4X pseudogene 6	2.45561	0	4.03582	0.029721	?	5	37085056	37085852	1						0
ENSG00000220553	RPL5P19	ribosomal protein L5 pseudogene 19	3.52123	0	4.54631	0.00201954	?	6	92013842	92014734	1						0
ENSG00000213078	AL390955.1		2.13124	0	3.82622	0.0376472	?	6	157365990	157366923		1					0
ENSG00000276290	RBBP4P3	RB binding protein 4 pseudogene 3	2.45561	0	4.02802	0.0111084	?	6	60873360	60874642	1						0
ENSG00000218520	AL450346.2		2.94129	0	4.27353	0.0104398	?	6	63229087	63230110		1					0
ENSG00000283444	AC083865.1		2.08499	0	3.80004	0.0380266	?	7	37796058	37796888		1					0
ENSG00000249213	AC079097.1		2.09665	0	3.80687	0.0308591	?	8	26254883	26256628		1					0
ENSG00000253397	AC069113.2		3.7768	0	4.66709	0.00720937	?	8	27904481	27910310		1					0
ENSG00000237038	USP17L8	ubiquitin specific peptidase 17-like family member 8	2.67659	0	4.17733	0.0354265	?	8	7971661	7973253							1
ENSG00000235165	CDK5P1	cyclin dependent kinase 5 pseudogene 1	2.09665	0	3.80218	0.0178871	?	8	122769274	122770150	1						0
ENSG00000227411	BAATP1	bile acid-CoA:amino acid N-acyltransferase pseudogene 1	2.49021	0	4.05237	0.0309416	?	9	101334084	101339347	1						0
ENSG00000255060	AC009656.1		2.45561	0	4.03222	0.0179284	?	11	36425447	36426122		1					0
ENSG00000257067	AP000797.3		2.37515	0	4.00236	0.0145438	?	11	115932774	115942995		1					0
ENSG00000255653	AP002383.1		2.82624	0	4.23872	0.0226171	?	11	95011858	95012532		1					0
ENSG00000265413	AP001094.2		2.72246	0	4.19464	0.0143482	?	18	8402847	8405161		1					0
ENSG00000257513	NPIPB1P	nuclear pore complex interacting protein family member B1, pseudogene	2.00453	0	3.76525	0.0258037	?	18	11619509	11639699	1						0
ENSG00000267188	AC245748.2	NA #or# zinc finger protein 229	2.82624	0	4.2424	0.0450773	?	19	44392439	44448452							1
ENSG00000261770	AC006504.1		2.79164	0	4.21512	0.00511427	?	19	27757184	27760849		1					0
ENSG00000182393	IFNL1	interferon lambda 1	2.3289	0	3.98073	0.0181194	?	19	39296325	39298673							1
ENSG00000225127	LINC00237	long intergenic non-protein coding RNA 237	2.642	0	4.17219	0.00644556	?	20	21087604	21106358			1				0
ENSG00000225091	SNORA71A	small nucleolar RNA, H/ACA box 71A	2.03912	0	3.78109	0.0297563	?	20	38427309	38427442					1		0
ENSG00000233215	LINC01687	long intergenic non-protein coding RNA 1687	2.30596	0	3.97475	0.0152175	?	21	22008944	22098459			1				0
ENSG00000228677	TTC3-AS1	TTC3 antisense RNA 1	2.642	0	4.16697	0.0135662	?	21	37187666	37193926							1
ENSG00000237977	EIF4HP2	eukaryotic translation initiation factor 4H pseudogene 2	2.28303	0	3.9613	0.0290887	?	22	30902219	30902781	1						0
ENSG00000224775	BRAFP1	BRAF pseudogene 1	3.24487	0	4.47523	0.00342406	?	0	75582676	75585506	1						0
ENSG00000226484	AL606516.1		2.45561	0	4.03408	0.0229932	?	0	36365626	36440292		1					0
ENSG00000231772	Z93403.1		3.45419	0	4.56123	0.0144834	?	0	42252459	42699385		1					0
ENSG00000225198	SSXP3	SSX family pseudogene 3	2.03912	0	3.78112	0.0271018	?	0	48156367	48166350	1						0
ENSG00000226434	AC135371.1		3.16227	0	4.40611	0.0330294	?	0	13377188	13403019		1					0
ENSG00000269791	SSX4B	SSX family member 4B	2.27137	0	3.96243	0.0138258	?	0	48402078	48411910							1
ENSG00000268651	CTAG1A	cancer/testis antigen 1A	2.51314	0	4.05829	0.0232375	?	0	154585143	154586821							1
ENSG00000220161	LINC02076	long intergenic non-protein coding RNA 2076	14.8375	28.933	-1.00328	0.00128493	-0.963474	17	18411159	18414380			1				0
ENSG00000083720	OXCT1	3-oxoacid CoA-transferase 1	6.25535	12.2681	-1.0289	0.0358518	-0.971748	5	41730065	41870519							1
ENSG00000176340	AP000721.1	cytochrome c oxidase subunit 8A #or# NA	7.4819	14.8105	-1.04025	0.0238505	-0.985144	11	63974607	63976543							1
ENSG00000127399	LRRC61	leucine rich repeat containing 61	9.67066	19.2022	-1.06225	0.00504486	-0.989582	7	150322639	150338150							1
ENSG00000261693	AC134682.1		5.97685	11.9317	-1.05362	0.0338767	-0.997339	8	142403652	142407028		1					0
ENSG00000184979	USP18	ubiquitin specific peptidase 18	13.415	26.8163	-1.00743	0.00276362	-0.999259	22	18149899	18177397							1
ENSG00000068079	IFI35	interferon induced protein 35	6.31288	12.6206	-1.04576	0.0294146	-0.999415	17	43006725	43014456							1
ENSG00000185837	HDHD5-AS1	HDHD5 antisense RNA 1	11.3296	22.6581	-1.00109	0.00513436	-0.999923	22	17159384	17165445							1
ENSG00000073169	SELENOO	selenoprotein O	10.9477	21.9057	-1.01486	0.00545998	-1.00067	22	50200979	50217616							1
ENSG00000165810	BTNL9	butyrophilin like 9	9.93965	19.8947	-1.00416	0.00869085	-1.00112	5	181040225	181061523							1
ENSG00000185022	MAFF	MAF bZIP transcription factor F	52.4232	105.008	-1.00398	3.2813e-09	-1.00222	22	38200767	38216511							1
ENSG00000141560	FN3KRP	fructosamine 3 kinase related protein	7.4611	14.9488	-1.01558	0.0160536	-1.00257	17	82716683	82730328							1
ENSG00000127884	ECHS1	enoyl-CoA hydratase, short chain 1	12.8944	25.8938	-1.00288	0.00238106	-1.00587	10	133362480	133373689							1
ENSG00000256747	AC009511.2		6.54513	13.1845	-1.01777	0.0359934	-1.01035	12	27779821	27781067		1					0
ENSG00000183098	GPC6	glypican 6	25.7182	52.0241	-1.02912	1.29457e-05	-1.01639	13	93226842	94407401							1
ENSG00000224877	NDUFAF8	NADH:ubiquinone oxidoreductase complex assembly factor 8	29.3354	59.4143	-1.00984	4.01422e-06	-1.01817	17	81239239	81241281							1
ENSG00000088826	SMOX	spermine oxidase	8.24822	16.7129	-1.0221	0.0157585	-1.01881	20	4120980	4187747							1
ENSG00000249923	AC007663.2		10.7406	21.7926	-1.047	0.00431034	-1.02077	22	20198729	20204918		1					0
ENSG00000254293	AC026688.2		8.40952	17.0692	-1.054	0.0111987	-1.0213	5	154483917	154486150		1					0
ENSG00000132622	HSPA12B	heat shock protein family A (Hsp70) member 12B	9.31384	18.919	-1.03759	0.00799022	-1.02239	20	3732667	3753111							1
ENSG00000102445	RUBCNL	RUN and cysteine rich domain containing beclin 1 interacting protein like /// RUN and cysteine rich domain containing beclin 1 interacting protein like #or# protein phosphatase 1 regulatory inhibitor subunit 2 pseudogene 4	8.16775	16.5932	-1.02064	0.0159882	-1.02258	13	46342000	46438190	1						0
ENSG00000233360	Z83844.2		9.41938	19.1452	-1.0041	0.0129276	-1.02328	22	37641832	37658377		1					0
ENSG00000278385	AC121338.2		7.97186	16.2089	-1.00157	0.0174053	-1.0238	12	47905122	47906865		1					0
ENSG00000138942	RNF185	ring finger protein 185	5.64082	11.4706	-1.06601	0.0312578	-1.02397	22	31160183	31207019							1
ENSG00000268635	AP003680.1		11.7716	23.95	-1.00589	0.00587575	-1.02471	11	77473371	77477030		1					0
ENSG00000141458	NPC1	NPC intracellular cholesterol transporter 1	32.0099	65.1733	-1.02988	6.7678e-07	-1.02576	18	23506184	23586898							1
ENSG00000064489	BORCS8-MEF2B	BORCS8-MEF2B readthrough /// BORCS8-MEF2B readthrough #or# BLOC-1 related complex subunit 8	6.47594	13.2097	-1.04062	0.0253419	-1.02843	19	19145567	19192158							1
ENSG00000121057	AKAP1	A-kinase anchoring protein 1	30.4702	62.2354	-1.00854	1.90639e-05	-1.03034	17	57085092	57121349							1
ENSG00000113734	BNIP1	BCL2 interacting protein 1	6.82363	13.9509	-1.06023	0.020365	-1.03175	5	173144442	173164387							1
ENSG00000237943	PRKCQ-AS1	PRKCQ antisense RNA 1	9.94917	20.3432	-1.10091	0.00317106	-1.0319	10	6580419	6616452							1
ENSG00000165389	SPTSSA	serine palmitoyltransferase small subunit A	7.75088	15.8497	-1.00537	0.0245775	-1.03202	14	34432789	34462356							1
ENSG00000275322	AC103746.1		8.89734	18.2096	-1.03635	0.00863236	-1.03325	15	96342953	96345651		1					0
ENSG00000164112	TMEM155	transmembrane protein 155 #or# NA /// transmembrane protein 155	5.78095	11.8334	-1.04518	0.0336276	-1.03349	4	121758933	121765427							1
ENSG00000154065	ANKRD29	ankyrin repeat domain 29	6.05731	12.4003	-1.09627	0.0230017	-1.03363	18	23598926	23662885							1
ENSG00000141040	ZNF287	zinc finger protein 287	7.12507	14.5873	-1.05952	0.0259031	-1.03373	17	16551387	16569206							1
ENSG00000260840	LINC01964	long intergenic non-protein coding RNA 1964	11.2146	22.9641	-1.04117	0.00400612	-1.034	2	85064108	85067347			1				0
ENSG00000243364	EFNA4	ephrin A4 #or# NA /// ephrin A4	8.37707	17.1601	-1.01525	0.0161282	-1.03454	1	155063731	155069553							1
ENSG00000227354	RBM26-AS1	RBM26 antisense RNA 1	28.3026	57.9937	-1.03978	4.51503e-06	-1.03496	13	79406309	79424328							1
ENSG00000128309	MPST	mercaptopyruvate sulfurtransferase	8.85323	18.1438	-1.0069	0.0136585	-1.0352	22	37019635	37029822							1
ENSG00000274322	AL136531.2	NA /// FK506 binding protein 1A #or# NA	9.16419	18.7831	-1.02739	0.00856309	-1.03535	20	1317571	1393096							1
ENSG00000268364	SMC5-AS1	SMC5 antisense RNA 1 (head to head)	17.7597	36.4294	-1.04897	0.000262929	-1.03649	9	70193997	70258866							1
ENSG00000182325	FBXL6	F-box and leucine rich repeat protein 6	15.4118	31.6216	-1.00037	0.00114915	-1.03688	8	144355431	144359376							1
ENSG00000100142	POLR2F	RNA polymerase II subunit F #or# microRNA 6820 /// RNA polymerase II subunit F	8.33082	17.095	-1.03979	0.00815085	-1.03704	22	37952607	38041915							1
ENSG00000165300	SLITRK5	SLIT and NTRK like family member 5	25.2092	51.7463	-1.04414	8.87437e-06	-1.03751	13	87672615	87696272							1
ENSG00000150867	PIP4K2A	phosphatidylinositol-5-phosphate 4-kinase type 2 alpha	8.21187	16.88	-1.08944	0.00926758	-1.03953	10	22534849	22714555							1
ENSG00000155393	HEATR3	HEAT repeat containing 3	13.2996	27.3845	-1.05491	0.00136094	-1.04198	16	50065941	50106387							1
ENSG00000053371	AKR7A2	aldo-keto reductase family 7 member A2	9.84753	20.279	-1.00917	0.0201866	-1.04215	1	19303965	19312146							1
ENSG00000225663	MCRIP1	MAPK regulated corepressor interacting protein 1	8.08691	16.656	-1.00136	0.0189557	-1.04238	17	81822361	81833302							1
ENSG00000273008	AC010864.1		11.7582	24.2199	-1.055	0.0267268	-1.04253	10	43136824	43138334		1					0
ENSG00000188580	NKAIN2	sodium/potassium transporting ATPase interacting 2	12.4549	25.6706	-1.04785	0.00103807	-1.0434	6	123804141	124825657							1
ENSG00000158156	XKR8	XK related 8	32.0427	66.1325	-1.07356	9.55541e-07	-1.04536	1	27959462	27968096							1
ENSG00000222020	AC062017.1		11.737	24.2397	-1.03118	0.00258049	-1.04631	2	239401436	239402364		1					0
ENSG00000159761	C16orf86	chromosome 16 open reading frame 86	10.9153	22.5599	-1.00307	0.00605	-1.04741	16	67666816	67668758							1
ENSG00000122861	PLAU	plasminogen activator, urokinase	5.56249	11.5024	-1.02101	0.038869	-1.04813	10	73909177	73917497							1
ENSG00000185267	CDNF	cerebral dopamine neurotrophic factor	16.7036	34.5411	-1.05789	0.000355461	-1.04815	10	14819250	14838575							1
ENSG00000109099	PMP22	peripheral myelin protein 22	6.19782	12.8349	-1.04414	0.03498	-1.05024	17	15229777	15265357							1
ENSG00000154529	CNTNAP3B	contactin associated protein like 3B	17.6351	36.5203	-1.01575	0.000481051	-1.05024	9	41890314	42129510							1
ENSG00000222047	C10orf55	chromosome 10 open reading frame 55	7.91219	16.3921	-1.0869	0.00774214	-1.05086	10	73909969	73922777							1
ENSG00000102931	ARL2BP	ADP ribosylation factor like GTPase 2 binding protein	13.0465	27.0408	-1.02949	0.0020951	-1.05147	16	57245098	57253635							1
ENSG00000264462	MIR3648-2	microRNA 3648-2	6.8833	14.2879	-1.02238	0.0429579	-1.05362	21	8986999	8987178				1			0
ENSG00000148803	FUOM	fucose mutarotase	17.4029	36.1311	-1.0264	0.000703441	-1.05391	10	133355154	133358035							1
ENSG00000165997	ARL5B	ADP ribosylation factor like GTPase 5B	10.8786	22.6085	-1.0666	0.00245747	-1.05538	10	18659405	18681639							1
ENSG00000185298	CCDC137	coiled-coil domain containing 137	26.2635	54.6376	-1.05733	1.24728e-05	-1.05684	17	81666364	81673904							1
ENSG00000033100	CHPF2	chondroitin polymerizing factor 2	20.6439	42.9527	-1.05932	5.4472e-05	-1.05704	7	151232489	151238827							1
ENSG00000064199	SPA17	sperm autoantigenic protein 17	11.7024	24.3558	-1.0179	0.00357357	-1.05746	11	124673798	124697518							1
ENSG00000248668	OXCT1-AS1	OXCT1 antisense RNA 1	13.0807	27.2545	-1.04346	0.00187369	-1.05905	5	41870030	41872241							1
ENSG00000141873	AC006538.2	DIRAS family GTPase 1 #or# NA /// solute carrier family 39 member 3 #or# NA	5.00549	10.4344	-1.03531	0.0496185	-1.05976	19	2732204	2740152							1
ENSG00000232388	SMIM26	small integral membrane protein 26	5.28185	11.0168	-1.09446	0.033825	-1.06059	20	18567347	18569563							1
ENSG00000141452	RMC1	regulator of MON1-CCZ1	12.4454	25.9692	-1.01901	0.00328061	-1.06119	18	23503470	23531807							1
ENSG00000262539	AC005829.2		10.0339	20.9419	-1.06631	0.00619314	-1.06151	17	46259551	46260606		1					0
ENSG00000156671	SAMD8	sterile alpha motif domain containing 8	13.3134	27.822	-1.04427	0.00128902	-1.06335	10	75099586	75182123							1
ENSG00000101856	PGRMC1	progesterone receptor membrane component 1	10.7886	22.548	-1.02231	0.00322458	-1.06349	0	119236245	119244466							1
ENSG00000100150	DEPDC5	DEP domain containing 5	30.7639	64.31	-1.03457	2.29902e-06	-1.0638	22	31753867	31908033							1
ENSG00000244486	SCARF2	scavenger receptor class F member 2	6.30336	13.1882	-1.06238	0.0257616	-1.06505	22	20424815	20437826							1
ENSG00000267665	AC021683.3		11.9558	25.0239	-1.06303	0.00205104	-1.06559	17	77526998	77536592		1					0
ENSG00000100124	ANKRD54	ankyrin repeat domain 54	29.6619	62.0956	-1.04586	4.7247e-06	-1.06588	22	37830855	37849327							1
ENSG00000172264	MACROD2	MACRO domain containing 2	18.1325	37.9743	-1.04066	0.000247606	-1.06645	20	13995369	16053197							1
ENSG00000269058	CALR3	calreticulin 3	15.974	33.457	-1.08141	0.000312707	-1.06658	19	16479057	16496192							1
ENSG00000011590	ZBTB32	zinc finger and BTB domain containing 32	13.8107	28.9847	-1.08219	0.000920735	-1.0695	19	35704527	35717038							1
ENSG00000009780	FAM76A	family with sequence similarity 76 member A	15.7132	33.0236	-1.04622	0.0161819	-1.07152	1	27725979	27763122							1
ENSG00000178718	RPP25	ribonuclease P and MRP subunit p25	31.304	65.8264	-1.07241	8.17731e-07	-1.07232	15	74954416	74957464							1
ENSG00000141562	NARF	nuclear prelamin A recognition factor #or# NARF intronic transcript 1 /// nuclear prelamin A recognition factor /// nuclear prelamin A recognition factor #or# NA	45.1965	95.0499	-1.06696	1.43661e-09	-1.07247	17	82458180	82490537							1
ENSG00000260021	AC098934.4		10.7864	22.6863	-1.07297	0.00235766	-1.0726	1	202810238	202810829		1					0
ENSG00000213398	LCAT	lecithin-cholesterol acyltransferase	6.75445	14.2118	-1.06114	0.0214905	-1.07318	16	67939750	67944131							1
ENSG00000254682	AP002387.2		5.12054	10.7899	-1.07141	0.0378896	-1.07532	11	71448674	71452157		1					0
ENSG00000100116	GCAT	glycine C-acetyltransferase	17.2511	36.3586	-1.06285	0.000241847	-1.07561	22	37807905	37817176							1
ENSG00000234676	IFT74-AS1	IFT74 antisense RNA 1	9.17547	19.347	-1.09175	0.00661476	-1.07626	9	26955780	26956295							1
ENSG00000254389	RHPN1-AS1	RHPN1 antisense RNA 1 (head to head)	10.1377	21.3817	-1.05701	0.00410784	-1.07665	8	143366631	143368548							1
ENSG00000118939	UCHL3	ubiquitin C-terminal hydrolase L3	13.0652	27.5627	-1.10942	0.000702134	-1.07699	13	75549480	75606020							1
ENSG00000225611	LINC02158	long intergenic non-protein coding RNA 2158	6.39548	13.4958	-1.05913	0.0253422	-1.07738	3	42770612	42773635			1				0
ENSG00000225235	INTS6L-AS1	INTS6L antisense RNA 1	6.24369	13.1786	-1.11309	0.0129861	-1.07772	0	135520083	135520674							1
ENSG00000269883	AC007375.3		18.0612	38.1228	-1.08168	0.000146579	-1.07777	14	77140683	77142996		1					0
ENSG00000262155	LINC02175	long intergenic non-protein coding RNA 2175	6.14205	12.9828	-1.03136	0.0312074	-1.07981	16	25066937	25068943			1				0
ENSG00000279259	AC087741.3		21.838	46.2267	-1.08383	1.39737e-05	-1.08189	17	80147250	80148596		1					0
ENSG00000277581	AL023803.3	DEAH-box helicase 35 #or# NA /// NA	5.42198	11.4898	-1.05696	0.0352903	-1.08346	20	38962472	38962993							1
ENSG00000230747	AC021188.1		4.73864	10.0507	-1.1023	0.0494922	-1.08475	2	96307263	96321731		1					0
ENSG00000167862	MRPL58	mitochondrial ribosomal protein L58	11.2029	23.7668	-1.09219	0.00275657	-1.08507	17	75012670	75021261							1
ENSG00000263818	AC091178.1		6.24369	13.254	-1.11378	0.0182461	-1.08596	17	39057019	39113190		1					0
ENSG00000267642	AC091198.1		10.347	21.9708	-1.04964	0.00321532	-1.08637	18	33552123	33578187		1					0
ENSG00000168917	SLC35G2	solute carrier family 35 member G2	20.6089	43.8484	-1.10336	2.40156e-05	-1.08926	3	136818647	136855892							1
ENSG00000240280	TCAM1P	testicular cell adhesion molecule 1, pseudogene	7.92385	16.8615	-1.12804	0.0064169	-1.08946	17	63849292	63864379	1						0
ENSG00000141519	CCDC40	coiled-coil domain containing 40	10.9845	23.406	-1.0959	0.00193385	-1.09141	17	80036632	80100613							1
ENSG00000154930	ACSS1	acyl-CoA synthetase short chain family member 1	10.1148	21.5531	-1.10004	0.00475363	-1.09143	20	25006230	25058980							1
ENSG00000047579	DTNBP1	dystrobrevin binding protein 1	8.7032	18.5598	-1.05207	0.0113373	-1.09257	6	15522801	15663058							1
ENSG00000259685	IDH2-DT	IDH2 divergent transcript	6.70858	14.3375	-1.05556	0.025452	-1.09571	15	90102649	90133445							1
ENSG00000152455	SUV39H2	suppressor of variegation 3-9 homolog 2	11.401	24.3941	-1.06711	0.00212786	-1.09738	10	14878820	14904315							1
ENSG00000254614	AP003068.2		6.24369	13.3641	-1.10156	0.0203837	-1.09789	11	65177606	65181834		1					0
ENSG00000256442	AC010186.1		6.03651	12.9295	-1.09199	0.0224481	-1.09888	12	9647014	9648009		1					0
ENSG00000266865	AC138207.8		12.1721	26.0727	-1.13912	0.00220176	-1.09896	17	31008497	31093127		1					0
ENSG00000114904	NEK4	NIMA related kinase 4	14.6073	31.2906	-1.12476	0.000739742	-1.09903	3	52708449	52770949							1
ENSG00000165629	ATP5F1C	ATP synthase F1 subunit gamma	11.875	25.449	-1.09374	0.000894938	-1.09968	10	7788129	7807815							1
ENSG00000244128	LINC01322	long intergenic non-protein coding RNA 1322	5.1322	11.0013	-1.10142	0.0294776	-1.10002	3	165206960	165655423			1				0
ENSG00000134758	RNF138	ring finger protein 138	34.4612	73.9063	-1.12374	4.11401e-07	-1.10072	18	32091855	32131561							1
ENSG00000272405	AL365181.3		9.49808	20.37	-1.12511	0.00309498	-1.10074	1	156641666	156644887		1					0
ENSG00000157064	NMNAT2	nicotinamide nucleotide adenylyltransferase 2	9.4081	20.1881	-1.0784	0.00364318	-1.10153	1	183248237	183418602							1
ENSG00000125901	MRPS26	mitochondrial ribosomal protein S26	16.2084	34.7849	-1.09088	0.000283303	-1.10172	20	3045945	3048254							1
ENSG00000134490	TMEM241	transmembrane protein 241	7.78547	16.7129	-1.08748	0.00772947	-1.10211	18	23197144	23437961							1
ENSG00000136770	DNAJC1	DnaJ heat shock protein family (Hsp40) member C1	28.7555	61.7827	-1.10145	0.000375657	-1.10337	10	21756537	22003769							1
ENSG00000135750	KCNK1	potassium two pore domain channel subfamily K member 1	10.796	23.1969	-1.13077	0.00148284	-1.10344	1	233614004	233672512							1
ENSG00000131773	KHDRBS3	KH RNA binding domain containing, signal transduction associated 3	7.56488	16.2562	-1.12771	0.012315	-1.1036	8	135457457	135656722							1
ENSG00000183762	KREMEN1	kringle containing transmembrane protein 1	21.9439	47.1876	-1.09639	1.42898e-05	-1.10459	22	29073078	29168333							1
ENSG00000175874	CREG2	cellular repressor of E1A stimulated genes 2	10.4158	22.3994	-1.07402	0.00426252	-1.10469	2	101345551	101387595							1
ENSG00000279494	AL117328.2		7.55322	16.2532	-1.11697	0.00931752	-1.10556	22	49851425	49853364		1					0
ENSG00000161940	BCL6B	B cell CLL/lymphoma 6B	12.1517	26.1555	-1.14499	0.000696985	-1.10595	17	7023020	7030290							1
ENSG00000254402	LRRC24	leucine rich repeat containing 24	12.2802	26.4644	-1.1244	0.0010977	-1.10772	8	144522377	144527032							1
ENSG00000136371	MTHFS	methenyltetrahydrofolate synthetase /// methenyltetrahydrofolate synthetase #or# ST20-MTHFS readthrough	21.9548	47.3311	-1.08518	5.54894e-05	-1.10825	15	79833585	79897379							1
ENSG00000228835	AC012123.1		4.26424	9.20235	-1.05172	0.0481381	-1.10971	18	32769795	32774413		1					0
ENSG00000148481	MINDY3	MINDY lysine 48 deubiquitinase 3	14.2943	30.8524	-1.1396	0.000318925	-1.10995	10	15778170	15860520							1
ENSG00000181029	TRAPPC5	trafficking protein particle complex 5	8.14658	17.5887	-1.05278	0.0113711	-1.11039	19	7680843	7687703							1
ENSG00000203705	TATDN3	TatD DNase domain containing 3	13.0578	28.1968	-1.08825	0.00108139	-1.11062	1	212791828	212816626							1
ENSG00000180340	FZD2	frizzled class receptor 2	5.31858	11.4987	-1.06312	0.0327555	-1.11236	17	44557459	44559570							1
ENSG00000269399	AC008764.6		7.03295	15.2104	-1.0965	0.0173877	-1.11285	19	16542746	16544814		1					0
ENSG00000141696	P3H4	prolyl 3-hydroxylase family member 4 (non-enzymatic)	39.717	85.9119	-1.0936	3.04615e-08	-1.1131	17	41801947	41812604							1
ENSG00000170619	COMMD5	COMM domain containing 5	11.8153	25.5627	-1.13961	0.000928903	-1.11338	8	144841042	144853736							1
ENSG00000106018	VIPR2	vasoactive intestinal peptide receptor 2	13.242	28.6913	-1.11742	0.000332626	-1.11548	7	159028175	159144957							1
ENSG00000178026	LRRC75B	leucine rich repeat containing 75B	9.48856	20.5605	-1.12101	0.00245217	-1.11561	22	24585620	24593208							1
ENSG00000182327	GLTPD2	glycolipid transfer protein domain containing 2	18.2709	39.592	-1.10752	0.00012887	-1.11566	17	4788959	4790390							1
ENSG00000085662	AKR1B1	aldo-keto reductase family 1 member B	25.835	56.0685	-1.12121	1.0342e-06	-1.11786	7	134442350	134459284							1
ENSG00000107614	TRDMT1	tRNA aspartic acid methyltransferase 1	22.648	49.1618	-1.11397	7.84957e-06	-1.11815	10	17142254	17202054							1
ENSG00000237988	OR2I1P	olfactory receptor family 2 subfamily I member 1 pseudogene	10.8422	23.5488	-1.12934	0.0017951	-1.11899	6	29550407	29557721	1						0
ENSG00000141542	RAB40B	RAB40B, member RAS oncogene family	15.5847	33.8694	-1.0822	0.00110503	-1.11985	17	82654973	82698728							1
ENSG00000204659	CBY3	chibby family member 3	13.1019	28.4902	-1.15131	0.000504821	-1.12069	5	179678583	179680974							1
ENSG00000165886	UBTD1	ubiquitin domain containing 1	11.3893	24.7851	-1.11406	0.00149196	-1.1218	10	97498868	97571209							1
ENSG00000239827	SUGT1P3	SUGT1 pseudogene 3 /// transmembrane phosphoinositide 3-phosphatase and tensin homolog 2 pseudogene 5 #or# SUGT1 pseudogene 3	12.2227	26.599	-1.12273	0.00133514	-1.12181	13	40882577	40921774	1						0
ENSG00000152465	NMT2	N-myristoyltransferase 2	11.2029	24.3846	-1.12598	0.00117245	-1.1221	10	15102584	15168693							1
ENSG00000122548	KIAA0087	KIAA0087 lncRNA	8.41128	18.3293	-1.10163	0.0046112	-1.12375	7	26533121	26538788							1
ENSG00000125868	DSTN	destrin, actin depolymerizing factor	18.5836	40.5091	-1.12257	4.1212e-05	-1.12422	20	17569863	17609919							1
ENSG00000170191	NANP	N-acetylneuraminic acid phosphatase	16.3239	35.584	-1.10993	0.000198533	-1.12425	20	25612935	25624175							1
ENSG00000095596	CYP26A1	cytochrome P450 family 26 subfamily A member 1	10.8327	23.6256	-1.14002	0.00210059	-1.12496	10	93073475	93077890							1
ENSG00000100218	RSPH14	radial spoke head 14 homolog	8.54966	18.6627	-1.12278	0.00653119	-1.12622	22	23059415	23145021							1
ENSG00000141449	GREB1L	GREB1 like retinoic acid receptor coactivator	12.1881	26.6343	-1.12317	0.000583653	-1.12782	18	21242242	21525417							1
ENSG00000141568	FOXK2	forkhead box K2	10.754	23.5184	-1.09812	0.00181828	-1.12892	17	82519713	82644662							1
ENSG00000172531	PPP1CA	protein phosphatase 1 catalytic subunit alpha	15.8745	34.7369	-1.08868	0.000471564	-1.12976	11	67398183	67421183							1
ENSG00000262786	AC005224.2		8.37493	18.3293	-1.14998	0.00479656	-1.13	17	14295512	14297600		1					0
ENSG00000100994	PYGB	glycogen phosphorylase B	15.6423	34.2646	-1.10472	0.000278461	-1.13127	20	25248069	25298014							1
ENSG00000101746	NOL4	nucleolar protein 4	19.67	43.1102	-1.15246	6.28658e-06	-1.13203	18	33851100	34224952							1
ENSG00000254369	HOXA-AS3	HOXA cluster antisense RNA 3	43.4571	95.254	-1.13234	3.23622e-10	-1.13219	7	27129977	27155928							1
ENSG00000151465	CDC123	cell division cycle 123	8.31916	18.2502	-1.08237	0.0090517	-1.1334	10	12195965	12250589							1
ENSG00000125826	RBCK1	RANBP2-type and C3HC4-type zinc finger containing 1	13.9444	30.6003	-1.1833	0.000302388	-1.13386	20	407498	430966							1
ENSG00000250222	AC008443.5		5.87307	12.8918	-1.16441	0.0151974	-1.13427	5	181191924	181194429		1					0
ENSG00000168806	LCMT2	leucine carboxyl methyltransferase 2	14.632	32.1258	-1.15275	0.000169599	-1.1346	15	43323649	43330605							1
ENSG00000141380	SS18	SS18, nBAF chromatin remodeling complex subunit	26.9564	59.188	-1.15742	1.91913e-07	-1.13468	18	26016253	26091217							1
ENSG00000260369	AC120024.1		8.96615	19.7247	-1.13146	0.00407651	-1.13744	17	80453735	80454729		1					0
ENSG00000065600	TMEM206	transmembrane protein 206	11.6773	25.7202	-1.14677	0.000675978	-1.13919	1	212363931	212414901							1
ENSG00000270006	AC010531.6		8.82816	19.4482	-1.13747	0.00771829	-1.13945	16	87317509	87318043		1					0
ENSG00000172466	ZNF24	zinc finger protein 24	14.9663	32.9727	-1.16081	0.000144367	-1.13955	18	35332212	35345482							1
ENSG00000007545	CRAMP1	cramped chromatin regulator homolog 1	8.78191	19.3721	-1.12733	0.0050647	-1.14138	16	1612325	1677908							1
ENSG00000226912	ISCA2P1	iron-sulfur cluster assembly 2 pseudogene 1	4.48307	9.89858	-1.15688	0.0396011	-1.14273	22	26644889	26645336	1						0
ENSG00000134755	DSC2	desmocollin 2	14.0776	31.0852	-1.12178	0.000218428	-1.14283	18	31058840	31102415							1
ENSG00000218739	CEBPZOS	CEBPZ opposite strand	6.81411	15.0595	-1.09743	0.0116938	-1.14408	2	37196488	37216193							1
ENSG00000269439	AC010618.3		23.9021	52.9303	-1.13432	3.34863e-06	-1.14695	19	17488990	17511889		1					0
ENSG00000185686	PRAME	preferentially expressed antigen in melanoma	11.5736	25.6603	-1.14848	0.000754181	-1.14871	22	22547701	22559361							1
ENSG00000275966	AC110285.6		10.0434	22.2797	-1.15488	0.00221671	-1.14948	17	81345476	81345966		1					0
ENSG00000198298	ZNF485	zinc finger protein 485	5.96733	13.2378	-1.11349	0.0229001	-1.14951	10	43606407	43617903							1
ENSG00000266805	AP005432.1		6.2229	13.8497	-1.10962	0.0135241	-1.15419	18	9506242	9509726		1					0
ENSG00000234696	GPR50-AS1	GPR50 antisense RNA 1	7.11379	15.8401	-1.15922	0.00859768	-1.15489	0	151175192	151177836							1
ENSG00000184939	ZFP90	ZFP90 zinc finger protein	11.654	25.9626	-1.16274	0.000736786	-1.15561	16	68530090	68576072							1
ENSG00000181409	AATK	apoptosis associated tyrosine kinase	18.0612	40.2617	-1.14524	6.67679e-05	-1.15652	17	81117295	81166077							1
ENSG00000261519	AC010542.4		7.15015	15.9443	-1.10953	0.0102043	-1.157	16	66549280	66551189		1					0
ENSG00000178764	ZHX2	zinc fingers and homeoboxes 2	6.73151	15.0212	-1.14149	0.00984358	-1.158	8	122781394	122974512							1
ENSG00000168461	RAB31	RAB31, member RAS oncogene family	4.36802	9.74776	-1.15357	0.0406678	-1.15809	18	9708165	9862551							1
ENSG00000131943	C19orf12	chromosome 19 open reading frame 12	14.7401	32.901	-1.12875	0.000576156	-1.15838	19	29698886	29715789							1
ENSG00000120915	EPHX2	epoxide hydrolase 2	8.10809	18.1083	-1.17638	0.00400649	-1.15922	8	27490779	27545564							1
ENSG00000133142	TCEAL4	transcription elongation factor A like 4	8.77063	19.5924	-1.14473	0.00302595	-1.15954	0	103576231	103587736							1
ENSG00000148426	PROSER2	proline and serine rich 2	6.98884	15.639	-1.07775	0.0146283	-1.16202	10	11823339	11872277							1
ENSG00000262585	LINC01979	long intergenic non-protein coding RNA 1979	6.04817	13.546	-1.12626	0.0240347	-1.1633	17	79915252	79926725			1				0
ENSG00000169689	CENPX	centromere protein X	15.1086	33.8678	-1.15616	0.000114011	-1.16454	17	82018702	82024107							1
ENSG00000223553	SMPD4P1	sphingomyelin phosphodiesterase 4 pseudogene 1	6.89282	15.4713	-1.15503	0.0129867	-1.16643	22	20602595	20656914	1						0
ENSG00000151657	KIN	Kin17 DNA and RNA binding protein	6.8833	15.4557	-1.09472	0.0118503	-1.16697	10	7750962	7787981							1
ENSG00000107537	PHYH	phytanoyl-CoA 2-hydroxylase	24.6179	55.2915	-1.18361	5.23497e-07	-1.16735	10	13277796	13302412							1
ENSG00000271387	AL445228.2		11.1454	25.0348	-1.17555	0.00117303	-1.16749	1	184385753	184386704		1					0
ENSG00000167081	PBX3	PBX homeobox 3	12.7433	28.678	-1.16542	0.000656857	-1.1702	9	125747345	125967377							1
ENSG00000148110	MFSD14B	major facilitator superfamily domain containing 14B	7.37112	16.5932	-1.105	0.0122892	-1.17064	9	94374551	94461042							1
ENSG00000141447	OSBPL1A	oxysterol binding protein like 1A /// oxysterol binding protein like 1A #or# RNA, 5S ribosomal pseudogene 452 /// oxysterol binding protein like 1A #or# NA	37.2956	83.9821	-1.16349	4.09852e-09	-1.17108	18	24162044	24397880	1						0
ENSG00000198169	ZNF251	zinc finger protein 251	24.5855	55.4069	-1.1584	8.14914e-07	-1.17226	8	144720907	144756417							1
ENSG00000183723	CMTM4	CKLF like MARVEL transmembrane domain containing 4	12.5608	28.3112	-1.14581	0.000718619	-1.17244	16	66614750	66696707							1
ENSG00000089558	KCNH4	potassium voltage-gated channel subfamily H member 4	5.73294	12.9236	-1.26073	0.00886095	-1.17266	17	42156891	42181278							1
ENSG00000123689	G0S2	G0/G1 switch 2	8.22314	18.5436	-1.23483	0.00284966	-1.17316	1	209675420	209676388							1
ENSG00000136425	CIB2	calcium and integrin binding family member 2	5.30693	11.9813	-1.13187	0.0310948	-1.17483	15	78104606	78131544							1
ENSG00000165171	METTL27	methyltransferase like 27	7.47276	16.88	-1.16973	0.0046087	-1.1756	7	73834590	73842535							1
ENSG00000101003	GINS1	GINS complex subunit 1	5.97685	13.5024	-1.20463	0.0113944	-1.17576	20	25407727	25452628							1
ENSG00000138279	ANXA7	annexin A7	9.86095	22.2953	-1.12711	0.00308754	-1.17694	10	73375101	73414076							1
ENSG00000264666	AC020558.1		10.1031	22.8599	-1.17938	0.00109779	-1.17802	17	17591428	17610485		1					0
ENSG00000176244	ACBD7	acyl-CoA binding domain containing 7	6.67184	15.1032	-1.20563	0.00866867	-1.1787	10	15077523	15088776							1
ENSG00000169660	HEXDC	hexosaminidase D	10.773	24.3876	-1.21583	0.000878044	-1.17873	17	82418318	82442645							1
ENSG00000181045	SLC26A11	solute carrier family 26 member 11	10.9685	24.8443	-1.22337	0.000629716	-1.17955	17	80219699	80253500							1
ENSG00000177602	HASPIN	histone H3 associated protein kinase	7.63582	17.3086	-1.14536	0.00960931	-1.18063	17	3723903	3726699							1
ENSG00000269296	AC005614.1		4.33343	9.82317	-1.16202	0.037785	-1.18068	19	40090754	40094406		1					0
ENSG00000198049	AVPR1B	arginine vasopressin receptor 1B	5.18973	11.767	-1.21451	0.022339	-1.18101	1	206109692	206117699							1
ENSG00000015171	ZMYND11	zinc finger MYND-type containing 11	9.86095	22.3677	-1.12325	0.00415242	-1.18162	10	134465	254637							1
ENSG00000150054	MPP7	membrane palmitoylated protein 7	10.9382	24.8162	-1.16115	0.000679114	-1.18191	10	28050993	28334486							1
ENSG00000166960	CCDC178	coiled-coil domain containing 178	8.72438	19.7978	-1.17539	0.00281118	-1.18222	18	32937402	33441101							1
ENSG00000255559	ZNF252P-AS1	ZNF252P antisense RNA 1	12.4687	28.2959	-1.11668	0.00198943	-1.18228	8	145002811	145006046							1
ENSG00000171130	ATP6V0E2	ATPase H+ transporting V0 subunit e2	27.6877	62.9109	-1.18755	1.27589e-07	-1.18406	7	149872968	149880698							1
ENSG00000130675	MNX1	motor neuron and pancreas homeobox 1	18.7466	42.6014	-1.1731	3.20661e-05	-1.18427	7	156994051	157010651							1
ENSG00000265008	AC011825.4		6.83705	15.5408	-1.11313	0.00866473	-1.18461	18	32091295	32092119		1					0
ENSG00000277602	AC005363.2		5.30693	12.0656	-1.13945	0.0297179	-1.18495	16	1971655	1971896		1					0
ENSG00000176732	PFN4	profilin family member 4	8.4346	19.1925	-1.17795	0.00462131	-1.18615	2	24115371	24123477							1
ENSG00000214087	ARL16	ADP ribosylation factor like GTPase 16	20.3901	46.456	-1.1872	3.09977e-06	-1.188	17	81681174	81683924							1
ENSG00000154764	WNT7A	Wnt family member 7A	3.82267	8.72046	-1.22231	0.0403324	-1.18982	3	13816258	13880121							1
ENSG00000153406	NMRAL1	NmrA like redox sensor 1	8.28281	18.9376	-1.22271	0.00191689	-1.19306	16	4461680	4495763							1
ENSG00000260325	HSPB9	heat shock protein family B (small) member 9	7.61075	17.4032	-1.22237	0.00375204	-1.19324	17	42121431	42123352							1
ENSG00000008394	MGST1	microsomal glutathione S-transferase 1	4.76158	10.8941	-1.1759	0.0246572	-1.19404	12	16347142	16609259							1
ENSG00000126467	TSKS	testis specific serine kinase substrate	8.77063	20.072	-1.20332	0.00215416	-1.19443	19	49739753	49763330							1
ENSG00000180525	PRR26	proline rich 26	13.0098	29.8472	-1.20675	0.000156171	-1.198	10	649948	669581							1
ENSG00000237523	LINC00857	long intergenic non-protein coding RNA 857	4.28756	9.83872	-1.16442	0.0307016	-1.19832	10	80207710	80219657			1				0
ENSG00000262172	AC116025.2		5.27233	12.1202	-1.17482	0.0225112	-1.2009	17	79991944	79992841		1					0
ENSG00000226742	HSBP1L1	heat shock factor binding protein 1 like 1	3.8802	8.93181	-1.25453	0.0380247	-1.20282	18	79964561	79970822							1
ENSG00000128165	ADM2	adrenomedullin 2	6.18616	14.24	-1.23925	0.00891961	-1.20283	22	50481556	50486440							1
ENSG00000015475	BID	BH3 interacting domain death agonist	14.2752	32.8656	-1.18854	0.000250393	-1.20307	22	17734138	17774770							1
ENSG00000228223	HCG11	HLA complex group 11 (non-protein coding)	16.3239	37.6002	-1.18687	5.09811e-05	-1.20376	6	26521709	26527404							1
ENSG00000106006	HOXA6	homeobox A6 /// homeobox A6 #or# NA	6.85822	15.8031	-1.24002	0.00385335	-1.2043	7	27145396	27150603							1
ENSG00000197415	VEPH1	ventricular zone expressed PH domain containing 1	5.20139	11.9939	-1.2456	0.0144415	-1.20533	3	157259742	157533619							1
ENSG00000256802	AC022613.1		4.23917	9.77585	-1.23426	0.0284047	-1.20544	15	29674990	29680957		1					0
ENSG00000100350	FOXRED2	FAD dependent oxidoreductase domain containing 2	12.8718	29.6839	-1.2126	0.000228779	-1.20546	22	36487190	36507101							1
ENSG00000141552	ANAPC11	anaphase promoting complex subunit 11 /// anaphase promoting complex subunit 11 #or# neuropeptide B	28.3394	65.4695	-1.19411	6.96527e-08	-1.20802	17	81890790	81900991							1
ENSG00000140995	DEF8	differentially expressed in FDCP 8 homolog	23.2993	53.8498	-1.19468	2.00046e-06	-1.20866	16	89947925	89968060							1
ENSG00000257057	C11orf97	chromosome 11 open reading frame 97	6.4876	14.999	-1.21105	0.00681383	-1.20911	11	94512432	94532123							1
ENSG00000214756	CSKMT	citrate synthase lysine methyltransferase	11.0995	25.6802	-1.22028	0.000387573	-1.21016	11	62665309	62668496							1
ENSG00000099985	OSM	oncostatin M	9.08373	21.0322	-1.21074	0.00212093	-1.21124	22	30262829	30266840							1
ENSG00000254991	AC124276.1		3.9974	9.26221	-1.16741	0.0343037	-1.2123	11	12066929	12073014		1					0
ENSG00000124104	SNX21	sorting nexin family member 21	13.905	32.2233	-1.19636	0.000250367	-1.2125	20	45833810	45843275							1
ENSG00000211786	TRAV8-2	T cell receptor alpha variable 8-2	5.50282	12.7559	-1.22702	0.0212839	-1.21292	14	21846537	21847221							1
ENSG00000230866	LINC02558	long intergenic non-protein coding RNA 2558	6.05945	14.0485	-1.22149	0.00882761	-1.21315	22	31970823	31973475			1				0
ENSG00000171298	GAA	glucosidase alpha, acid	16.9017	39.2024	-1.23814	2.21613e-05	-1.21378	17	80101556	80119879							1
ENSG00000125821	DTD1	D-tyrosyl-tRNA deacylase 1 /// D-tyrosyl-tRNA deacylase 1 #or# NA	12.4454	28.8893	-1.15828	0.000592937	-1.21492	20	18587893	18766644							1
ENSG00000076826	CAMSAP3	calmodulin regulated spectrin associated protein family member 3 #or# microRNA 6792 /// calmodulin regulated spectrin associated protein family member 3	9.76492	22.7173	-1.22598	0.00094692	-1.21811	19	7595902	7618304							1
ENSG00000198795	ZNF521	zinc finger protein 521	13.7299	31.9832	-1.19543	8.8533e-05	-1.21999	18	25061926	25352190							1
ENSG00000197566	ZNF624	zinc finger protein 624	19.4053	45.2084	-1.21963	4.22409e-06	-1.22014	17	16620737	16653856							1
ENSG00000255384	AP001267.2		11.3738	26.5021	-1.26112	0.00471785	-1.2204	11	118433121	118435206		1					0
ENSG00000100427	MLC1	megalencephalic leukoencephalopathy with subcortical cysts 1	9.73033	22.6876	-1.27223	0.000677547	-1.22134	22	50059391	50085902							1
ENSG00000067900	ROCK1	Rho associated coiled-coil containing protein kinase 1	29.6351	69.2034	-1.23334	5.92632e-09	-1.22354	18	20946906	21111851							1
ENSG00000185736	ADARB2	adenosine deaminase, RNA specific B2 (inactive)	8.68803	20.3167	-1.23772	0.00195653	-1.22557	10	1177318	1737476							1
ENSG00000180440	SERTM1	serine rich and transmembrane domain containing 1	8.58425	20.1276	-1.22452	0.00159832	-1.22941	13	36673912	36697839							1
ENSG00000261033	AC005730.2		7.1826	16.8614	-1.22214	0.00646882	-1.23115	17	20008051	20009234		1					0
ENSG00000151778	SERP2	stress associated endoplasmic reticulum protein family member 2	4.87663	11.4491	-1.28007	0.013572	-1.23128	13	44373665	44397714							1
ENSG00000243811	APOBEC3D	apolipoprotein B mRNA editing enzyme catalytic subunit 3D #or# NA /// apolipoprotein B mRNA editing enzyme catalytic subunit 3D	5.12054	12.0412	-1.27008	0.0147392	-1.23361	22	39021113	39033276							1
ENSG00000072210	ALDH3A2	aldehyde dehydrogenase 3 family member A2	32.1521	75.6245	-1.22363	3.44935e-09	-1.23394	17	19648136	19677598							1
ENSG00000214435	AS3MT	arsenite methyltransferase #or# BORCS7-ASMT readthrough (NMD candidate) /// arsenite methyltransferase	7.20553	16.9531	-1.27305	0.00411441	-1.23437	10	102869516	102901899							1
ENSG00000177076	ACER2	alkaline ceramidase 2	6.81197	16.0448	-1.20705	0.00573708	-1.23596	9	19409059	19452020							1
ENSG00000130429	ARPC1B	actin related protein 2/3 complex subunit 1B	8.62098	20.3079	-1.22694	0.00237909	-1.23611	7	99374249	99394814							1
ENSG00000259694	AC136698.1		4.72698	11.1366	-1.21552	0.0255238	-1.23631	15	84171178	84173194		1					0
ENSG00000283938	MIR3917	stathmin 1 #or# microRNA 3917 /// microRNA 3917	5.11103	12.0507	-1.16579	0.0247727	-1.23744	1	25906362	25906454				1			0
ENSG00000167701	GPT	glutamic--pyruvic transaminase	7.91433	18.6693	-1.19754	0.00658537	-1.23813	8	144502973	144507174							1
ENSG00000274602	PI4KAP1	phosphatidylinositol 4-kinase alpha pseudogene 1	8.42294	19.8726	-1.22466	0.00300209	-1.23838	22	18533646	18577968	1						0
ENSG00000256235	SMIM3	small integral membrane protein 3	8.60718	20.3551	-1.25251	0.00144583	-1.24178	5	150777946	150796734							1
ENSG00000274378	AC005702.3		3.78808	8.9599	-1.24188	0.0412712	-1.24202	17	60025859	60030746		1					0
ENSG00000234210	AC006372.3		3.89186	9.20601	-1.32371	0.0220519	-1.24212	7	157466231	157499716		1					0
ENSG00000134061	CD180	CD180 molecule	4.13577	9.79507	-1.28753	0.021339	-1.2439	5	67179613	67196799							1
ENSG00000189060	H1F0	H1 histone family member 0	12.0134	28.4872	-1.26386	0.000179655	-1.24567	22	37805093	37807436							1
ENSG00000177272	KCNA3	potassium voltage-gated channel subfamily A member 3	8.7339	20.7438	-1.29911	0.00104399	-1.24798	1	110672465	110675033							1
ENSG00000260267	AC026471.1		20.3693	48.4262	-1.23115	3.3299e-06	-1.24939	16	31456711	31459736		1					0
ENSG00000152464	RPP38	ribonuclease P/MRP subunit p38	16.5561	39.4236	-1.22984	1.65507e-05	-1.2517	10	15097180	15139818							1
ENSG00000178719	GRINA	glutamate ionotropic receptor NMDA type subunit associated protein 1	4.33343	10.3206	-1.2138	0.0253124	-1.25195	8	143990058	143993415							1
ENSG00000275805	AC090206.1		3.8802	9.24665	-1.27818	0.0256467	-1.2528	18	26565723	26575626		1					0
ENSG00000170525	PFKFB3	6-phosphofructo-2-kinase/fructose-2,6-biphosphatase 3	30.3668	72.4975	-1.23351	1.26166e-08	-1.25544	10	6144934	6254644							1
ENSG00000179399	GPC5	glypican 5	23.2392	55.5422	-1.25794	8.40556e-08	-1.25702	13	91398607	92873682							1
ENSG00000183010	PYCR1	pyrroline-5-carboxylate reductase 1 #or# myeloid associated differentiation marker like 2 /// pyrroline-5-carboxylate reductase 1	12.6829	30.3232	-1.2986	0.000132685	-1.25754	17	81932384	81942412							1
ENSG00000171889	MIR31HG	MIR31 host gene	4.58685	10.9738	-1.32703	0.0191233	-1.25849	9	21455642	21559669				1			0
ENSG00000263069	AC124319.2		4.72698	11.3095	-1.21851	0.0151949	-1.25855	17	80351828	80415168		1					0
ENSG00000268584	AC073389.1		13.8198	33.0859	-1.27093	4.28936e-05	-1.25947	10	73625996	73626790		1					0
ENSG00000266524	GDF10	growth differentiation factor 10	2.94129	7.04492	-1.39657	0.040229	-1.26013	10	47300386	47313547							1
ENSG00000165118	C9orf64	chromosome 9 open reading frame 64	11.827	28.3913	-1.29359	0.000175941	-1.26337	9	83938311	83956986							1
ENSG00000153391	INO80C	INO80 complex subunit C	9.68446	23.279	-1.31066	0.000367227	-1.26528	18	35452230	35497991							1
ENSG00000171867	PRNP	prion protein	11.0649	26.6158	-1.24531	0.000855664	-1.26629	20	4686236	4701590							1
ENSG00000173818	ENDOV	endonuclease V	22.629	54.4461	-1.23793	3.51412e-07	-1.26666	17	80415165	80438086							1
ENSG00000186354	C9orf47	chromosome 9 open reading frame 47	3.4983	8.4307	-1.28325	0.0389928	-1.269	9	88990863	88996140							1
ENSG00000128245	YWHAH	tyrosine 3-monooxygenase/tryptophan 5-monooxygenase activation protein eta #or# NA /// tyrosine 3-monooxygenase/tryptophan 5-monooxygenase activation protein eta	8.78191	21.1879	-1.27538	0.00221999	-1.27064	22	31944461	31957603							1
ENSG00000156886	AC093520.1	integrin subunit alpha D #or# NA /// NA	4.86536	11.7514	-1.31719	0.00863011	-1.27222	16	31393312	31426505							1
ENSG00000153363	LINC00467	long intergenic non-protein coding RNA 467	6.34961	15.3397	-1.25843	0.00399364	-1.27253	1	211382803	211435333			1				0
ENSG00000264859	DSG2-AS1	DSG2 antisense RNA 1	3.24487	7.86021	-1.23879	0.0488174	-1.27641	18	31542146	31556911							1
ENSG00000231993	EP300-AS1	EP300 antisense RNA 1	4.60027	11.1468	-1.26022	0.0179979	-1.27684	22	41174591	41197456							1
ENSG00000231728	TMSB15B-AS1	TMSB15B antisense RNA 1	12.384	30.0215	-1.30142	4.19735e-05	-1.27752	0	103917411	103919548							1
ENSG00000108684	ASIC2	acid sensing ion channel subunit 2	3.8802	9.4233	-1.34098	0.0177943	-1.2801	17	33013087	34174964							1
ENSG00000198792	TMEM184B	transmembrane protein 184B	14.8876	36.1582	-1.28276	1.73379e-05	-1.28021	22	38219291	38273034							1
ENSG00000178896	EXOSC4	exosome component 4	5.48165	13.3205	-1.21944	0.0111733	-1.28096	8	144078626	144080647							1
ENSG00000169738	DCXR	dicarbonyl and L-xylulose reductase	33.6667	81.8389	-1.28001	4.75188e-10	-1.28146	17	82035136	82037732							1
ENSG00000205669	ACOT6	acyl-CoA thioesterase 6	9.55951	23.2478	-1.24675	0.00119392	-1.28209	14	73610945	73619888							1
ENSG00000275445	AC092119.3		3.37158	8.20748	-1.30453	0.0334043	-1.28351	16	22007480	22008062		1					0
ENSG00000227932	AL390961.3	NA /// selenoprotein O like, pseudogene #or# NA	8.76849	21.3477	-1.33141	0.000420578	-1.28368	10	26664206	26697295	1						0
ENSG00000285095	AC025887.2		3.03555	7.39153	-1.31437	0.0355775	-1.28391	18	32470288	32745567		1					0
ENSG00000120075	HOXB5	homeobox B5	11.3434	27.6491	-1.27306	0.000163601	-1.28537	17	48591257	48593961							1
ENSG00000233849	AC022201.2		5.42198	13.2192	-1.26202	0.0196775	-1.28575	2	70301451	70302072		1					0
ENSG00000132640	BTBD3	BTB domain containing 3	11.0649	27.012	-1.26847	0.000169617	-1.28761	20	11890723	11926609							1
ENSG00000253102	AC004707.1		8.08691	19.7542	-1.29799	0.00136656	-1.2885	17	50396438	50397888		1					0
ENSG00000166171	DPCD	deleted in primary ciliary dyskinesia homolog (mouse)	8.74556	21.3728	-1.30876	0.000876947	-1.28915	10	101570560	101609668							1
ENSG00000141194	OR4D1	olfactory receptor family 4 subfamily D member 1 /// olfactory receptor family 4 subfamily D member 1 #or# msh homeobox 2 pseudogene 1	8.94107	21.8577	-1.33991	0.000373418	-1.28962	17	58148449	58159555	1						0
ENSG00000228696	ARL17B	ADP ribosylation factor like GTPase 17B	12.6621	30.978	-1.29013	4.43923e-05	-1.29073	17	46274784	46361797							1
ENSG00000134453	RBM17	RNA binding motif protein 17	11.8287	28.9528	-1.28274	0.000445587	-1.29141	10	6088987	6117457							1
ENSG00000168118	RAB4A	RAB4A, member RAS oncogene family	12.8714	31.5115	-1.29925	6.69414e-05	-1.29171	1	229271062	229305894							1
ENSG00000125848	FLRT3	fibronectin leucine rich transmembrane protein 3	7.09048	17.3655	-1.29592	0.00187653	-1.29227	20	14322988	14337616							1
ENSG00000230426	ERVMER61-1	endogenous retrovirus group MER61 member 1	5.14348	12.6051	-1.31703	0.00825734	-1.29319	1	187070700	187686622							1
ENSG00000271360	AL512631.2		7.11555	17.4505	-1.22761	0.00749663	-1.29422	10	11611305	11612227		1					0
ENSG00000185386	MAPK11	mitogen-activated protein kinase 11	6.63725	16.279	-1.34644	0.00370149	-1.29436	22	50263713	50270767							1
ENSG00000100288	CHKB	choline kinase beta	7.01001	17.2044	-1.26994	0.00510072	-1.29529	22	50578949	50601455							1
ENSG00000184226	PCDH9	protocadherin 9	88.68	217.698	-1.30628	2.48798e-16	-1.29565	13	66302834	67230445							1
ENSG00000170315	UBB	ubiquitin B	5.52576	13.5748	-1.2813	0.00709128	-1.29669	17	16380798	16382745							1
ENSG00000147257	GPC3	glypican 3	6.5702	16.1424	-1.22229	0.00574673	-1.29684	0	133535745	133985895							1
ENSG00000100129	EIF3L	eukaryotic translation initiation factor 3 subunit L /// eukaryotic translation initiation factor 3 subunit L #or# NA	26.2635	64.5997	-1.30422	4.90102e-08	-1.29847	22	37848868	37889407							1
ENSG00000285115	AL162588.1		3.66136	9.00722	-1.2805	0.0339557	-1.2987	9	113060086	113060507		1					0
ENSG00000266036	AC016888.1		5.17807	12.7433	-1.28534	0.0105339	-1.29925	17	74747319	74748912		1					0
ENSG00000075643	MOCOS	molybdenum cofactor sulfurase	10.5101	25.8687	-1.27666	0.000236163	-1.29944	18	36187519	36272157							1
ENSG00000228701	TNKS2-AS1	TNKS2 antisense RNA 1 (head to head)	3.33699	8.21936	-1.25867	0.0485379	-1.30048	10	91782839	91798291							1
ENSG00000187792	ZNF70	zinc finger protein 70	11.6929	28.8301	-1.25098	0.000790008	-1.30195	22	23738678	23751092							1
ENSG00000116574	RHOU	ras homolog family member U	19.9965	49.3235	-1.29503	6.5164e-07	-1.30253	1	228735077	228746669							1
ENSG00000120693	SMAD9	SMAD family member 9	6.1883	15.2739	-1.27757	0.0053857	-1.30345	13	36844831	36920765							1
ENSG00000200057	RIMBP3B	RIMS binding protein 3B /// RNA, 7SK small nuclear pseudogene 63 #or# RIMS binding protein 3B	17.9253	44.2439	-1.2669	1.04445e-05	-1.30348	22	21389191	21389491	1						0
ENSG00000137960	GIPC2	GIPC PDZ domain containing family member 2 #or# DnaJ heat shock protein family (Hsp40) member B4 /// GIPC PDZ domain containing family member 2	4.86536	12.0537	-1.35109	0.00685575	-1.30886	1	77979542	78138449							1
ENSG00000130193	THEM6	thioesterase superfamily member 6	7.36898	18.2664	-1.27489	0.0029728	-1.30966	8	142727203	142736927							1
ENSG00000122378	FAM213A	family with sequence similarity 213 member A	9.76707	24.2325	-1.29468	0.000620255	-1.31094	10	80407829	80437115							1
ENSG00000053702	NRIP2	nuclear receptor interacting protein 2	4.04365	10.0345	-1.30728	0.0170622	-1.31124	12	2825348	2835544							1
ENSG00000221953	C1orf229	chromosome 1 open reading frame 229	8.08691	20.0899	-1.28933	0.00140422	-1.31281	1	247110160	247112417							1
ENSG00000284048	AC073111.4	zinc finger protein 775 #or# NA #or# NA /// NA /// zinc finger protein 775 #or# NA	5.52576	13.7418	-1.30698	0.00657264	-1.31433	7	150379329	150410597							1
ENSG00000257267	ZNF271P	zinc finger protein 271, pseudogene	16.7771	41.7487	-1.28179	4.52767e-06	-1.31524	18	35290282	35328390	1						0
ENSG00000077420	APBB1IP	amyloid beta precursor protein binding family B member 1 interacting protein	6.02486	15.0337	-1.2826	0.00641985	-1.3192	10	26438203	26567803							1
ENSG00000163064	EN1	engrailed homeobox 1	5.96733	14.9206	-1.27559	0.00457469	-1.32215	2	118842171	118847678							1
ENSG00000150281	CTF1	cardiotrophin 1	6.99836	17.5199	-1.2944	0.00436366	-1.32391	16	30896607	30903560							1
ENSG00000184785	SMIM10	small integral membrane protein 10	8.52672	21.3633	-1.33778	0.000604626	-1.32507	0	134990938	134992473							1
ENSG00000161594	KLHL10	kelch like family member 10	3.97446	9.95844	-1.28579	0.0204766	-1.32516	17	41835685	41848384							1
ENSG00000283073	SMUG1-AS1	SMUG1 antisense RNA 1	5.24726	13.1558	-1.35544	0.00597797	-1.32606	12	54142591	54147485							1
ENSG00000168246	UBTD2	ubiquitin domain containing 2	6.67574	16.7698	-1.27773	0.0460418	-1.32886	5	172209640	172284071							1
ENSG00000173988	LRRC63	leucine rich repeat containing 63	3.63629	9.13655	-1.42957	0.0150453	-1.32918	13	46211943	46277366							1
ENSG00000108602	ALDH3A1	aldehyde dehydrogenase 3 family member A1	14.5283	36.573	-1.32554	1.32304e-05	-1.33192	17	19737984	19748943							1
ENSG00000141384	TAF4B	TATA-box binding protein associated factor 4b	27.7386	69.9515	-1.30787	1.7246e-09	-1.33446	18	26225936	26391685							1
ENSG00000250344	AC105254.1		4.8537	12.2607	-1.32714	0.0128741	-1.33689	4	121071429	121080476		1					0
ENSG00000263823	AC009831.1		28.6962	72.502	-1.35405	4.35716e-10	-1.33716	18	31942575	31944156		1					0
ENSG00000233895	AL121761.1		3.33699	8.43371	-1.32607	0.0308708	-1.33762	20	19757708	19809675		1					0
ENSG00000139890	REM2	RRAD and GEM like GTPase 2	19.753	50.0952	-1.34053	1.37355e-07	-1.3426	14	22883165	22887686							1
ENSG00000129993	CBFA2T3	CBFA2/RUNX1 translocation partner 3	7.18474	18.2317	-1.2944	0.00278488	-1.34344	16	88874858	88977204							1
ENSG00000229915	AC016999.1		3.81315	9.67829	-1.25685	0.0261164	-1.34377	2	238427077	238427729		1					0
ENSG00000179673	RPRML	reprimo like	6.26663	15.9125	-1.36409	0.00243534	-1.3444	17	46978156	46979248							1
ENSG00000257150	PGAM1P5	phosphoglycerate mutase 1 pseudogene 5	3.54417	9.02277	-1.40044	0.0234851	-1.34812	12	95551582	95673999	1						0
ENSG00000125871	MGME1	mitochondrial genome maintenance exonuclease 1	12.4779	31.8185	-1.33499	5.5451e-05	-1.35049	20	17968913	17991122							1
ENSG00000250366	TUNAR	TCL1 upstream neural differentiation-associated RNA	4.49473	11.5083	-1.373	0.0123477	-1.35637	14	95876392	95925571							1
ENSG00000159792	PSKH1	protein serine kinase H1	9.02582	23.143	-1.33216	0.000422187	-1.35844	16	67893272	67929678							1
ENSG00000229891	LINC01315	long intergenic non-protein coding RNA 1315	7.36898	18.9058	-1.34341	0.00131104	-1.35929	22	42364400	42369236			1				0
ENSG00000185829	ARL17A	ADP ribosylation factor like GTPase 17A	10.8997	27.9765	-1.41505	3.85045e-05	-1.35993	17	46516702	46579682							1
ENSG00000141428	C18orf21	chromosome 18 open reading frame 21 #or# NA /// chromosome 18 open reading frame 21	33.2407	85.3422	-1.34943	3.88751e-11	-1.36031	18	35972083	35979286							1
ENSG00000283503	LINC01902	long intergenic non-protein coding RNA 1902	4.51767	11.5999	-1.39939	0.00577222	-1.36047	18	39841809	39896298			1				0
ENSG00000245059	AC092718.1		6.6048	17.0152	-1.32396	0.00326379	-1.36524	16	81077319	81078861		1					0
ENSG00000101752	MIB1	mindbomb E3 ubiquitin protein ligase 1	9.76707	25.2227	-1.36087	0.000128484	-1.36873	18	21704957	21870957							1
ENSG00000164256	PRDM9	PR/SET domain 9	76.9078	199.178	-1.36556	7.73495e-16	-1.37286	5	23443586	23528597							1
ENSG00000237575	PYY2	peptide YY 2 (pseudogene)	17.5179	45.3887	-1.3763	5.1866e-07	-1.3735	17	28226563	28228065	1						0
ENSG00000159387	IRX6	iroquois homeobox 6	12.2685	31.8294	-1.389	2.27509e-05	-1.3754	16	55323760	55330760							1
ENSG00000284867	AL449105.2		2.79164	7.25853	-1.371	0.0465391	-1.37856	9	113081871	113082292		1					0
ENSG00000227071	FOCAD-AS1	FOCAD antisense RNA 1	6.94083	18.1024	-1.3406	0.00197683	-1.383	9	20683304	20684688							1
ENSG00000265688	MAFG-DT	MAFG divergent transcript	19.1289	49.8947	-1.37566	7.50358e-07	-1.38313	17	81927829	81930753							1
ENSG00000185269	NOTUM	notum, palmitoleoyl-protein carboxylesterase	5.60836	14.6457	-1.31094	0.00736947	-1.38483	17	81952507	81961840							1
ENSG00000234928	LINC01659	long intergenic non-protein coding RNA 1659	6.04603	15.8179	-1.40809	0.00389987	-1.3875	22	23433564	23435071			1				0
ENSG00000170425	ADORA2B	adenosine A2b receptor	11.7024	30.6165	-1.36951	5.24803e-05	-1.3875	17	15944917	15975746							1
ENSG00000250821	EXOC1L	exocyst complex component 1 like	5.86179	15.3397	-1.4114	0.00198743	-1.38786	4	55819819	55837487							1
ENSG00000134323	MYCN	MYCN proto-oncogene, bHLH transcription factor	3.15061	8.25113	-1.42517	0.0239646	-1.38896	2	15940564	15947007							1
ENSG00000105605	CACNG7	calcium voltage-gated channel auxiliary subunit gamma 7	12.5471	32.9823	-1.39325	9.0245e-06	-1.39435	19	53909335	53943941							1
ENSG00000153339	TRAPPC8	trafficking protein particle complex 8	12.8506	33.8139	-1.35891	6.51822e-06	-1.39578	18	31829173	31953136							1
ENSG00000268388	FENDRR	FOXF1 adjacent non-coding developmental regulatory RNA	4.64652	12.2267	-1.37024	0.00748127	-1.39581	16	86474529	86509099							1
ENSG00000188316	ENO4	enolase 4	4.83076	12.7248	-1.42082	0.00350771	-1.39732	10	116849512	116911788							1
ENSG00000280392	AC007496.3		7.24013	19.0794	-1.42034	0.000486394	-1.39793	16	53991012	53994454		1					0
ENSG00000238002	NPAP1P6	nuclear pore associated protein 1 pseudogene 6	2.66493	7.03465	-1.36163	0.0352215	-1.40038	9	79863019	79866875	1						0
ENSG00000167131	CCDC103	coiled-coil domain containing 103	2.57281	6.80181	-1.35353	0.0442457	-1.40257	17	44899142	44905390							1
ENSG00000100027	YPEL1	yippee like 1	8.41128	22.2515	-1.36559	0.00119431	-1.40351	22	21697544	21735834							1
ENSG00000168779	SHOX2	short stature homeobox 2	4.6578	12.3524	-1.3647	0.0118984	-1.40707	3	158095954	158106503							1
ENSG00000186812	ZNF397	zinc finger protein 397	22.4387	59.537	-1.42907	1.16456e-09	-1.4078	18	35241030	35267133							1
ENSG00000227355	AL359644.1		6.43007	17.0692	-1.40268	0.00130715	-1.40848	9	121369906	121463237		1					0
ENSG00000087245	MMP2	matrix metallopeptidase 2	5.15514	13.7041	-1.4004	0.00448827	-1.41053	16	55389700	55506691							1
ENSG00000257042	AC008011.2		4.5544	12.1195	-1.35975	0.016331	-1.412	12	27958517	27969813		1					0
ENSG00000141429	GALNT1	polypeptide N-acetylgalactosaminyltransferase 1	6.2917	16.7447	-1.38279	0.00108007	-1.41218	18	35581117	35711834							1
ENSG00000134452	FBH1	F-box DNA helicase 1	9.94179	26.4762	-1.38187	0.000123398	-1.41312	10	5890203	5937594							1
ENSG00000103241	FOXF1	forkhead box F1	5.64296	15.0344	-1.37776	0.00308028	-1.41374	16	86510527	86515418							1
ENSG00000243449	C4orf48	chromosome 4 open reading frame 48	5.32986	14.2274	-1.38886	0.00517527	-1.4165	4	2041993	2043970							1
ENSG00000147613	PSKH2	protein serine kinase H2	4.48521	11.9902	-1.32946	0.00961262	-1.41861	8	86048373	86088621							1
ENSG00000213888	LINC01521	long intergenic non-protein coding RNA 1521	14.7838	39.7051	-1.40721	1.88829e-06	-1.4253	22	31346777	31348719			1				0
ENSG00000276131	AC009118.2		2.81458	7.56084	-1.42873	0.0408716	-1.42563	16	58392153	58392807		1					0
ENSG00000128311	TST	thiosulfate sulfurtransferase	9.45397	25.4192	-1.42937	0.000311461	-1.42692	22	37010859	37020183							1
ENSG00000223799	IL10RB-DT	IL10RB divergent transcript	3.79974	10.2296	-1.43781	0.0152899	-1.42878	21	33263873	33266260							1
ENSG00000092054	MYH7	myosin heavy chain 7	8.352	22.5263	-1.43815		-1.43142	14	23412738	23435718							1
ENSG00000169668	BCRP2	breakpoint cluster region pseudogene 2	14.0157	37.9823	-1.48457	2.18143e-06	-1.43828	22	21103016	21122285	1						0
ENSG00000271303	SRXN1	sulfiredoxin 1	4.6578	12.6242	-1.40862	0.00893331	-1.43848	20	646615	653370							1
ENSG00000165995	CACNB2	calcium voltage-gated channel auxiliary subunit beta 2	14.6762	39.8153	-1.47708	3.33416e-07	-1.43985	10	18140677	18543557							1
ENSG00000273253	AL022328.4		6.94083	18.837	-1.41115	0.00100404	-1.44039	22	50199090	50200837		1					0
ENSG00000158516	CPA2	carboxypeptidase A2	2.49021	6.77071	-1.51267	0.035608	-1.44304	7	130266827	130289798							1
ENSG00000141424	SLC39A6	solute carrier family 39 member 6	11.3759	30.9374	-1.4652	2.26584e-05	-1.44337	18	36108532	36129385							1
ENSG00000178852	EFCAB13	EF-hand calcium binding domain 13 /// EF-hand calcium binding domain 13 #or# NA	10.4045	28.3076	-1.44223	2.6132e-05	-1.44398	17	47323290	47441312							1
ENSG00000197496	SLC2A10	solute carrier family 2 member 10	4.11245	11.1964	-1.43632	0.00956947	-1.44497	20	46709487	46736347							1
ENSG00000278905	AC106818.1		11.8157	32.2322	-1.46766	2.57121e-06	-1.4478	5	93600357	93603598		1					0
ENSG00000167641	PPP1R14A	protein phosphatase 1 regulatory inhibitor subunit 14A	2.82624	7.71533	-1.49579	0.0264164	-1.44884	19	38251237	38256591							1
ENSG00000211445	GPX3	glutathione peroxidase 3	7.62241	20.8148	-1.45959	0.000212649	-1.44929	5	151020438	151028993							1
ENSG00000170310	STX8	syntaxin 8	7.55322	20.6389	-1.47775	0.000322098	-1.4502	17	9250471	9576591							1
ENSG00000274253	AC138649.1		3.84561	10.5416	-1.49574	0.0109917	-1.4548	15	22757857	22778741		1					0
ENSG00000205309	NT5M	5',3'-nucleotidase, mitochondrial	7.45158	20.4335	-1.4123	0.0156686	-1.45531	17	17303335	17347663							1
ENSG00000187049	TMEM216	transmembrane protein 216	7.15966	19.6906	-1.46368	0.000475528	-1.45955	11	61391687	61398863							1
ENSG00000156096	UGT2B4	UDP glucuronosyltransferase family 2 member B4	2.29431	6.31032	-1.42904	0.0407898	-1.45965	4	69480165	69526014							1
ENSG00000178927	CYBC1	cytochrome b-245 chaperone 1	14.4711	39.9764	-1.46482	1.04362e-06	-1.46597	17	82442589	82450829							1
ENSG00000213742	ZNF337-AS1	ZNF337 antisense RNA 1	8.80698	24.3462	-1.41696	0.000142177	-1.46698	20	25624045	25678074							1
ENSG00000260314	MRC1	mannose receptor C-type 1	3.3024	9.13288	-1.40717	0.0248751	-1.46756	10	17809344	17911170							1
ENSG00000173110	HSPA6	heat shock protein family A (Hsp70) member 6	4.28756	11.8801	-1.44672	0.0198561	-1.47032	1	161524540	161526910							1
ENSG00000080709	KCNN2	potassium calcium-activated channel subfamily N member 2	9.39644	26.0608	-1.45807	4.50113e-05	-1.4717	5	114360945	114496500							1
ENSG00000165379	LRFN5	leucine rich repeat and fibronectin type III domain containing 5	4.72698	13.1498	-1.48126	0.00269403	-1.47605	14	41607570	41904549							1
ENSG00000253741	AC108002.1		6.02486	16.7949	-1.44986	0.0018123	-1.47903	8	142702252	142726973		1					0
ENSG00000179630	LACC1	laccase domain containing 1 #or# NA /// laccase domain containing 1	8.77063	24.4786	-1.48313	7.90394e-05	-1.48077	13	43879284	43893932							1
ENSG00000284630	AP000553.5		2.58447	7.2556	-1.45186	0.0331045	-1.48923	22	21657811	21661021		1					0
ENSG00000169740	ZNF32	zinc finger protein 32	6.05945	17.038	-1.48068	0.00133773	-1.4915	10	43643859	43648856							1
ENSG00000146383	TAAR6	trace amine associated receptor 6	2.34056	6.58152	-1.48055	0.0373166	-1.49157	6	132570322	132571359							1
ENSG00000119922	IFIT2	interferon induced protein with tetratricopeptide repeats 2	2.42102	6.81736	-1.5283	0.0390212	-1.4936	10	89283694	89309276							1
ENSG00000264070	DND1P1	DND microRNA-mediated repression inhibitor 1 pseudogene 1	10.6117	29.9706	-1.51737	9.39088e-06	-1.49789	17	45585871	45586929	1						0
ENSG00000175711	B3GNTL1	UDP-GlcNAc:betaGal beta-1,3-N-acetylglucosaminyltransferase like 1	10.6481	30.0735	-1.4685	1.41035e-05	-1.4979	17	82942155	83051810							1
ENSG00000231203	KRT8P10	keratin 8 pseudogene 10	4.04365	11.4299	-1.47279	0.0106516	-1.49908	2	183071040	183072486	1						0
ENSG00000112981	NME5	NME/NM23 family member 5	2.94343	8.3206	-1.47318	0.0223738	-1.49919	5	138115172	138139443							1
ENSG00000170509	HSD17B13	hydroxysteroid 17-beta dehydrogenase 13 #or# NA /// hydroxysteroid 17-beta dehydrogenase 13	2.93178	8.30438	-1.44874	0.0220909	-1.5021	4	87303789	87322906							1
ENSG00000106829	TLE4	transducin like enhancer of split 4	87.7135	248.52	-1.5028	3.63903e-20	-1.50249	9	79571773	79726882							1
ENSG00000077943	ITGA8	integrin subunit alpha 8	9.65201	27.3934	-1.48949	2.1393e-05	-1.50493	10	15513949	15720125							1
ENSG00000100359	SGSM3	small G protein signaling modulator 3	6.77776	19.2548	-1.50243	0.00185724	-1.50633	22	40370591	40410289							1
ENSG00000101349	PAK5	p21 (RAC1) activated kinase 5	6.18402	17.5821	-1.57637	0.00059982	-1.50749	20	9537389	9839041							1
ENSG00000148429	USP6NL	USP6 N-terminal like	8.15824	23.2723	-1.4606	0.000125738	-1.51228	10	11453946	11611754							1
ENSG00000185875	THNSL1	threonine synthase like 1	4.78451	13.6694	-1.51806	0.00264018	-1.51451	10	25016658	25026664							1
ENSG00000234181	AL353795.2		2.36349	6.7545	-1.49556	0.0349977	-1.51493	9	35096378	35098141		1					0
ENSG00000133115	STOML3	stomatin like 3	2.34056	6.70058	-1.45907	0.0409304	-1.51743	13	38965925	38991066							1
ENSG00000172137	CALB2	calbindin 2	2.72246	7.79734	-1.51333	0.0253733	-1.51807	16	71358713	71390438							1
ENSG00000101439	CST3	cystatin C	5.36445	15.3774	-1.50759	0.0013034	-1.51931	20	23626706	23638473							1
ENSG00000197302	ZNF720	zinc finger protein 720	9.23299	26.4762	-1.52516	5.23655e-05	-1.51983	16	31713229	31794869							1
ENSG00000118276	B4GALT6	beta-1,4-galactosyltransferase 6	13.8336	39.7487	-1.50167	3.13113e-07	-1.52273	18	31622247	31685836							1
ENSG00000203280	AL022323.1		3.46371	9.96504	-1.5365	0.0135969	-1.52456	22	25102433	25112692		1					0
ENSG00000130656	HBZ	hemoglobin subunit zeta	2.30596	6.63478	-1.49095	0.0354981	-1.52468	16	152687	154503							1
ENSG00000140905	GCSH	glycine cleavage system protein H	8.6344	24.8473	-1.441	0.00022891	-1.52492	16	81081938	81096425							1
ENSG00000165512	ZNF22	zinc finger protein 22	2.36349	6.80181	-1.53216	0.0399788	-1.525	10	45000475	45005326							1
ENSG00000156427	FGF18	fibroblast growth factor 18	4.75206	13.7048	-1.47517	0.0371486	-1.52805	5	171419656	171457623							1
ENSG00000272582	AL031587.3		3.0239	8.7234	-1.47804	0.0266157	-1.52848	22	37950965	37951778		1					0
ENSG00000154342	WNT3A	Wnt family member 3A	25.6122	74.1523	-1.55121	6.03594e-12	-1.53366	1	228007051	228061260							1
ENSG00000227050	AL512288.1		4.03199	11.682	-1.52437	0.00649172	-1.53472	1	27938875	27960193		1					0
ENSG00000204237	OXLD1	oxidoreductase like domain containing 1	12.7084	36.87	-1.55683	1.78474e-06	-1.53667	17	81665036	81666635							1
ENSG00000046604	DSG2	desmoglein 2	8.36541	24.3019	-1.48984	7.48135e-05	-1.53856	18	31498043	31549008							1
ENSG00000259985	AC017100.1		2.27137	6.60961	-1.45478	0.0399709	-1.541	18	31685655	31686823		1					0
ENSG00000196476	C20orf96	chromosome 20 open reading frame 96	4.77324	13.894	-1.54059	0.00206708	-1.54142	20	270863	290778							1
ENSG00000235781	LINC02569	long intergenic non-protein coding RNA 2569	5.29565	15.4307	-1.51312	0.00173434	-1.54292	6	30516266	30519217			1				0
ENSG00000100156	SLC16A8	solute carrier family 16 member 8	2.94343	8.6229	-1.52116	0.0182331	-1.55067	22	38078134	38084093							1
ENSG00000101773	MIR4741	RB binding protein 8, endonuclease #or# microRNA 4741	4.35636	12.7721	-1.55398	0.0031712	-1.5518	18	22798261	23026488				1			0
ENSG00000228350	LINC02585	long intergenic non-protein coding RNA 2585	6.02486	17.7174	-1.52454	0.00103085	-1.55617	3	48663776	48669174			1				0
ENSG00000274818	AC004825.2		1.81814	5.34949	-1.63789	0.0419233	-1.55693	14	70906657	70907111		1					0
ENSG00000233086	AL358975.1		2.09665	6.17505	-1.6255	0.0270783	-1.55837	9	79505804	79532342		1					0
ENSG00000185730	ZNF696	zinc finger protein 696	13.7874	40.6739	-1.5701	1.41903e-07	-1.56075	8	143289676	143298061							1
ENSG00000184743	ATL3	atlastin GTPase 3	16.9705	50.3641	-1.59848	7.89427e-09	-1.56937	11	63624087	63671921							1
ENSG00000268628	AL121761.2		4.88829	14.5075	-1.59584	0.00117397	-1.5694	20	19756390	19758037		1					0
ENSG00000250571	GLI4	GLI family zinc finger 4	4.36802	12.9673	-1.56219	0.00270799	-1.56982	8	143267433	143276931							1
ENSG00000228293	AL049712.1		2.642	7.86681	-1.55255	0.0193862	-1.57415	20	2664352	2665874		1					0
ENSG00000154040	CABYR	calcium binding tyrosine phosphorylation regulated	8.71096	25.9506	-1.59157	3.20361e-05	-1.57487	18	24138956	24161603							1
ENSG00000220891	AC246793.1		2.37515	7.10412	-1.58862	0.0286658	-1.58064	22	22559343	22566602		1					0
ENSG00000101782	RIOK3	RIO kinase 3	24.1301	72.1967	-1.60639	1.85961e-12	-1.5811	18	23452823	23486603							1
ENSG00000182912	TSPEAR-AS2	TSPEAR antisense RNA 2	13.7783	41.3658	-1.55244	5.8918e-08	-1.58605	21	44517216	44525952							1
ENSG00000278134	AL627230.7		2.42102	7.27775	-1.63022	0.0200964	-1.58788	9	67722083	67722683		1					0
ENSG00000100077	GRK3	G protein-coupled receptor kinase 3	4.64652	14.0042	-1.58432	0.00193486	-1.59163	22	25564849	25729294							1
ENSG00000165996	HACD1	3-hydroxyacyl-CoA dehydratase 1	5.78095	17.5014	-1.61244	0.000723793	-1.5981	10	17589032	17617377							1
ENSG00000176485	PLA2G16	phospholipase A2 group XVI	5.58543	16.9177	-1.55196	0.000682861	-1.59879	11	63573195	63616883							1
ENSG00000236307	EEF1E1P1	eukaryotic translation elongation factor 1 epsilon 1 pseudogene 1	2.00453	6.07382	-1.54999	0.0436848	-1.59934	2	111887914	111888741	1						0
ENSG00000106526	ACTR3C	ARP3 actin related protein 3 homolog C	8.4554	25.6728	-1.63291	5.37835e-05	-1.6023	7	150243916	150323725							1
ENSG00000197705	KLHL14	kelch like family member 14	4.50815	13.7018	-1.5641	0.00139809	-1.60376	18	32672671	32773062							1
ENSG00000226969	AL391845.1		6.78904	20.7203	-1.61177	0.000167405	-1.60976	1	2049203	2050070		1					0
ENSG00000159921	GNE	glucosamine (UDP-N-acetyl)-2-epimerase/N-acetylmannosamine kinase	7.86846	24.0165	-1.58283	8.17844e-05	-1.60987	9	36214441	36277056							1
ENSG00000186814	ZSCAN30	zinc finger and SCAN domain containing 30	4.61193	14.0921	-1.57397	0.00122667	-1.61145	18	35251058	35290245							1
ENSG00000234884	AL022329.1		2.3289	7.13221	-1.56924	0.0289828	-1.6147	22	25561117	25564462		1					0
ENSG00000123388	HOXC11	homeobox C11	13.0578	40.1936	-1.5945	1.49586e-07	-1.62205	12	53973126	53977643							1
ENSG00000265458	AC132938.3		4.34508	13.3797	-1.58204	0.00232151	-1.62259	17	82454273	82458521		1					0
ENSG00000264464	AC091170.1		2.79164	8.59774	-1.64791	0.00719097	-1.62284	18	49499390	49501860		1					0
ENSG00000242114	MTFP1	mitochondrial fission process 1	5.47951	16.9021	-1.62929	0.000458583	-1.62509	22	30425530	30429053							1
ENSG00000284962	AL449105.3		2.21384	6.82991	-1.52338	0.0381006	-1.62531	9	113070983	113071404		1					0
ENSG00000248498	ASNSP1	asparagine synthetase pseudogene 1	2.06205	6.36424	-1.67942	0.0237655	-1.6259	8	46579213	46638886	1						0
ENSG00000279085	AL022323.3		6.7661	20.8843	-1.61675	0.000134045	-1.62602	22	25009685	25015072		1					0
ENSG00000162687	KCNT2	potassium sodium-activated channel subfamily T member 2	18.4279	56.9295	-1.6911	1.16696e-10	-1.62729	1	196225779	196609225							1
ENSG00000150477	KIAA1328	KIAA1328	24.2265	74.887	-1.62437	2.01079e-12	-1.62813	18	36829106	37232172							1
ENSG00000124257	NEURL2	neuralized E3 ubiquitin protein ligase 2	1.76062	5.44705	-1.65402	0.0469677	-1.6294	20	45888625	45891287							1
ENSG00000120549	KIAA1217	KIAA1217	10.658	32.9876	-1.6318	6.68803e-07	-1.62999	10	23694746	24547848							1
ENSG00000158201	ABHD3	abhydrolase domain containing 3	14.181	44.059	-1.63022	2.44558e-05	-1.63548	18	21650897	21704805							1
ENSG00000269106	AC012313.7		1.85274	5.77452	-1.74796	0.043991	-1.64004	19	58475355	58475763		1					0
ENSG00000134762	DSC3	desmocollin 3	8.27329	25.8148	-1.61996	1.76913e-05	-1.64166	18	30990008	31042815							1
ENSG00000164935	DCSTAMP	dendrocyte expressed seven transmembrane protein	1.81814	5.67761	-1.78783	0.0279236	-1.64282	8	104339087	104356689							1
ENSG00000164900	GBX1	gastrulation brain homeobox 1	6.26663	19.6906	-1.68159	0.000135128	-1.65175	7	151148589	151174745							1
ENSG00000125895	TMEM74B	transmembrane protein 74B	2.47855	7.7914	-1.72271	0.0135422	-1.65239	20	1180561	1185415							1
ENSG00000256508	MRGPRF-AS1	MRGPRF antisense RNA 1	2.3289	7.328	-1.616	0.0274605	-1.65377	11	69012283	69018447							1
ENSG00000158473	CD1D	CD1d molecule	3.70548	11.6664	-1.76417	0.00193779	-1.65463	1	158179947	158184896							1
ENSG00000146151	HMGCLL1	3-hydroxymethyl-3-methylglutaryl-CoA lyase like 1	5.2494	16.5615	-1.59981	0.000603389	-1.65761	6	55434369	55579214							1
ENSG00000274554	AC083806.2		1.947	6.14329	-1.60006	0.0373295	-1.65776	12	116948738	116951422		1					0
ENSG00000235984	GPC5-AS1	GPC5 antisense RNA 1	1.51671	4.80775	-1.85367	0.0331539	-1.66442	13	92701389	92721614							1
ENSG00000267413	LINC01901	long intergenic non-protein coding RNA 1901	6.27828	19.9546	-1.69037	0.000150335	-1.66828	18	39841174	39924840			1				0
ENSG00000279613	AC124283.5		2.37515	7.5645	-1.68231	0.0213622	-1.67123	17	82648849	82650657		1					0
ENSG00000180015	AC093909.1		2.30596	7.35316	-1.64844	0.0275771	-1.67299	4	188738373	188739494		1					0
ENSG00000141431	ASXL3	additional sex combs like 3, transcriptional regulator	8.66471	27.6537	-1.68431	2.27299e-06	-1.67425	18	33578233	33751192							1
ENSG00000177757	FAM87B	family with sequence similarity 87 member B	2.63034	8.41222	-1.67202	0.0131995	-1.67724	1	817371	819837							1
ENSG00000125810	CD93	CD93 molecule	1.70309	5.45006	-1.70153	0.0484951	-1.67812	20	23079349	23086340							1
ENSG00000248958	ZSWIM5P3	zinc finger SWIM-type containing 5 pseudogene 3	4.35636	13.9945	-1.67458	0.000717629	-1.68367	4	129135926	129139740	1						0
ENSG00000217555	CKLF-CMTM1	CKLF-CMTM1 readthrough /// chemokine like factor #or# CKLF-CMTM1 readthrough	1.73768	5.59193	-1.71234	0.0425962	-1.68618	16	66552563	66566251							1
ENSG00000103089	FA2H	fatty acid 2-hydroxylase	5.29527	17.041	-1.65568	0.00923477	-1.68623	16	74712955	74774831							1
ENSG00000232599	AL008707.1		1.96993	6.34803	-1.65487	0.0335559	-1.68816	0	125203805	125204338		1					0
ENSG00000229259	LRRC37A12P	leucine rich repeat containing 37 member A12, pseudogene	3.09308	9.98059	-1.69357	0.00604502	-1.69008	1	32423214	32426789	1						0
ENSG00000164128	NPY1R	neuropeptide Y receptor Y1	6.61432	21.3715	-1.68893	6.3354e-05	-1.69202	4	163323961	163344832							1
ENSG00000265158	LRRC37A7P	leucine rich repeat containing 37 member A7, pseudogene	2.00453	6.48029	-1.62217	0.0300809	-1.6928	18	31724198	31726956	1						0
ENSG00000228719	AL022313.2		1.48211	4.79814	-1.80244	0.044115	-1.69482	22	36445395	36454944		1					0
ENSG00000185669	SNAI3	snail family transcriptional repressor 3	3.82267	12.4033	-1.69835	0.00311832	-1.69807	16	88677682	88686493							1
ENSG00000154059	IMPACT	impact RWD domain protein	12.5587	40.8861	-1.68347	4.76661e-08	-1.70292	18	24426616	24453535							1
ENSG00000129991	TNNI3	troponin I3, cardiac type /// troponin I3, cardiac type #or# NA	8.05056	26.2385	-1.72479	0.00183693	-1.70452	19	55151767	55157773							1
ENSG00000148488	ST8SIA6	ST8 alpha-N-acetyl-neuraminide alpha-2,8-sialyltransferase 6	2.84917	9.30292	-1.76509	0.00876933	-1.70714	10	17318383	17454330							1
ENSG00000185527	PDE6G	phosphodiesterase 6G	1.87781	6.14329	-1.60985	0.0368277	-1.70996	17	81650459	81663112							1
ENSG00000185666	SYN3	synapsin III	5.43364	17.8282	-1.68914	0.000261245	-1.71417	22	32512552	33058372							1
ENSG00000100290	BIK	BCL2 interacting killer	1.93534	6.35463	-1.65572	0.0266634	-1.71522	22	43110748	43129712							1
ENSG00000264456	AC138207.4		3.03555	10.0087	-1.67523	0.00595947	-1.72122	17	30971652	30973312		1					0
ENSG00000212951	BX005266.1		5.81768	19.2643	-1.64381	0.000238473	-1.72741	9	62532397	62532853		1					0
ENSG00000244588	RAD21L1	RAD21 cohesin complex component like 1 /// syntaphilin #or# RAD21 cohesin complex component like 1	6.02486	19.9863	-1.7124	8.6805e-05	-1.73002	20	1226056	1296421							1
ENSG00000231081	AL078587.1		2.09665	6.96584	-1.75877	0.0222919	-1.73221	20	26008791	26010531		1					0
ENSG00000283122	HYMAI	hydatidiform mole associated and imprinted (non-protein coding)	9.35057	31.19	-1.71553	1.15184e-06	-1.73796	6	144004916	144008262							1
ENSG00000261481	AC022167.4		1.99287	6.65693	-1.71491	0.0266015	-1.74001	16	8869251	8870032		1					0
ENSG00000272735	AC007881.3		3.41959	11.4772	-1.64304	0.00530594	-1.74688	2	71067519	71068125		1					0
ENSG00000259705	AC084757.3		2.82624	9.51125	-1.78058	0.00610799	-1.75075	15	48645951	48652016		1					0
ENSG00000141425	RPRD1A	regulation of nuclear pre-mRNA domain containing 1A	19.2072	64.8931	-1.76948	7.93544e-13	-1.75642	18	35984387	36067576							1
ENSG00000130768	SMPDL3B	sphingomyelin phosphodiesterase acid like 3B	6.25749	21.2309	-1.71675	5.40472e-05	-1.76251	1	27934993	27959157							1
ENSG00000187855	ASCL4	achaete-scute family bHLH transcription factor 4	3.91479	13.2887	-1.80414	0.00100296	-1.76319	12	107774385	107776644							1
ENSG00000225626	C9orf135-DT	C9orf135 divergent transcript	1.33247	4.54315	-1.79617	0.0409752	-1.76959	9	69818983	69820739							1
ENSG00000262814	MRPL12	mitochondrial ribosomal protein L12 /// NA #or# mitochondrial ribosomal protein L12	6.89282	23.5555	-1.79556	1.71265e-05	-1.7729	17	81703357	81707526							1
ENSG00000107242	PIP5K1B	phosphatidylinositol-4-phosphate 5-kinase type 1 beta	4.18378	14.3249	-1.69948	0.00112097	-1.77565	9	68705414	69009176							1
ENSG00000267746	AC104985.1		5.74635	19.6996	-1.77337	0.000104979	-1.77745	18	34222965	34224761		1					0
ENSG00000099617	EFNA2	ephrin A2	2.07371	7.14182	-1.8105	0.0161576	-1.78408	19	1286154	1300237							1
ENSG00000273248	AC010997.5		2.30596	7.94222	-1.75348	0.0161181	-1.78417	10	75408973	75409326		1					0
ENSG00000141441	GAREM1	GRB2 associated regulator of MAPK1 subtype 1	4.24131	14.659	-1.73843	0.000535685	-1.78921	18	32124877	32470484							1
ENSG00000175106	TVP23C-CDRT4	trans-golgi network vesicle protein 23 homolog C #or# TVP23C-CDRT4 readthrough	4.42555	15.2983	-1.77211	0.000540149	-1.78945	17	15502264	15563595							1
ENSG00000262413	AC145207.2		6.39334	22.16	-1.83472	4.95457e-05	-1.79332	17	81867721	81868552		1					0
ENSG00000167065	DUSP18	dual specificity phosphatase 18 /// dual specificity phosphatase 18 #or# NA	6.25535	21.7003	-1.81758	1.52394e-05	-1.79455	22	30652051	30667890							1
ENSG00000166974	MAPRE2	microtubule associated protein RP/EB family member 2	26.254	91.2039	-1.77728	2.07254e-16	-1.79656	18	34976928	35143470							1
ENSG00000134759	ELP2	elongator acetyltransferase complex subunit 2	17.495	61.1349	-1.80235	6.03876e-13	-1.80505	18	36129444	36180556							1
ENSG00000262003	AC087392.1		3.42911	12.0759	-1.8399	0.00118124	-1.81622	17	909632	911212		1					0
ENSG00000185942	NKAIN3	sodium/potassium transporting ATPase interacting 3	1.93534	6.82397	-1.76671	0.0169813	-1.81802	8	62248591	62999652							1
ENSG00000068383	INPP5A	inositol polyphosphate-5-phosphatase A	2.66493	9.39748	-1.76287	0.00591931	-1.81818	10	132537820	132783480							1
ENSG00000228983	SLC47A1P1	SLC47A1 pseudogene 1	1.96993	6.94963	-1.74841	0.0243712	-1.81879	17	19579943	19596058	1						0
ENSG00000048540	LMO3	LIM domain only 3	4.60979	16.2724	-1.90032	0.000111229	-1.81966	12	16548373	16610594							1
ENSG00000134470	IL15RA	interleukin 15 receptor subunit alpha /// interleukin 15 receptor subunit alpha #or# NA	12.8506	45.382	-1.78152	1.44595e-09	-1.82028	10	5943639	5978187							1
ENSG00000119673	ACOT2	acyl-CoA thioesterase 2	6.01144	21.3219	-1.86516	2.05017e-05	-1.82655	14	73567620	73575658							1
ENSG00000166033	HTRA1	HtrA serine peptidase 1	1.59931	5.71165	-1.7511	0.0385219	-1.83646	10	122461525	122514908							1
ENSG00000226747	AC007966.1		2.29431	8.21936	-1.77029	0.00843719	-1.84097	2	185719874	185740479		1					0
ENSG00000214076	SLC5A4-AS1	cleavage and polyadenylation specific factor 1 pseudogene 1 #or# SLC5A4 antisense RNA 1 /// SLC5A4 antisense RNA 1	4.50601	16.2562	-1.89034	0.000162488	-1.85107	22	32269381	32273110	1						0
ENSG00000134709	HOOK1	hook microtubule tethering protein 1	14.1559	51.1579	-1.88139	2.66782e-11	-1.85356	1	59814786	59876378							1
ENSG00000270182	AC004080.4		1.64556	5.97031	-1.83824	0.0294538	-1.85923	7	27158344	27158976		1					0
ENSG00000230848	AL360268.2		1.38999	5.06274	-1.8945	0.0315362	-1.86484	9	128039135	128057362		1					0
ENSG00000124575	HIST1H1D	histone cluster 1 H1 family member d	3.39452	12.4159	-1.8771	0.00115038	-1.87091	6	26234268	26234933							1
ENSG00000266010	GATA6-AS1	GATA6 antisense RNA 1 (head to head)	3.42911	12.6494	-1.90479	0.000485896	-1.88316	18	22166898	22168968							1
ENSG00000273139	AC007663.3		1.48211	5.46921	-1.97019	0.0242599	-1.88368	22	20320739	20321203		1					0
ENSG00000251126	AC017007.5		1.96993	7.35976	-1.86938	0.0147036	-1.90151	4	112880298	112882330		1					0
ENSG00000225180	PVALEF	parvalbumin like EF-hand containing	2.26923	8.47802	-2.02854	0.00769293	-1.90152	17	81165507	81183164							1
ENSG00000224215	AL606469.1		2.39809	8.9599	-1.89495	0.00501859	-1.9016	10	23343957	23345181		1					0
ENSG00000272115	AC233992.3		3.47712	13.0056	-1.83638	0.00175312	-1.90317	8	144409492	144409976		1					0
ENSG00000065665	SEC61A2	Sec61 translocon alpha 2 subunit	4.8537	18.2125	-1.90314	6.92198e-05	-1.90777	10	12129637	12169961							1
ENSG00000223784	LINP1	lncRNA in non-homologous end joining pathway 1	2.39809	9.08263	-1.92966	0.00372317	-1.92123	10	6737382	6739026							1
ENSG00000198075	SULT1C4	sulfotransferase family 1C member 4	4.79617	18.1964	-1.93165	4.98049e-05	-1.9237	2	108377911	108388057							1
ENSG00000215838	AL451074.1		1.70309	6.47735	-1.95476	0.0132804	-1.92725	1	165698750	165709968		1					0
ENSG00000253388	AC124067.1		1.70309	6.4833	-1.92159	0.0166584	-1.92857	8	37480089	37480809		1					0
ENSG00000203952	CCDC160	coiled-coil domain containing 160	2.39809	9.25626	-1.96412	0.00325162	-1.94855	0	134237047	134246207							1
ENSG00000276337	AC105429.1		3.62677	14.0035	-1.92134	0.000573118	-1.94903	16	87470370	87474370		1					0
ENSG00000163737	PF4	platelet factor 4	1.03103	4.01989	-1.97275	0.0419069	-1.96307	4	73981077	73982124							1
ENSG00000260281	ITFG1-AS1	ITFG1 antisense RNA 1	1.76062	6.86827	-2.01347	0.0111253	-1.96387	16	47144323	47162747							1
ENSG00000127951	FGL2	fibrinogen like 2	2.3289	9.15804	-1.94202	0.00406939	-1.97539	7	77193371	77199848							1
ENSG00000267750	RUNDC3A-AS1	RUNDC3A antisense RNA 1	3.79974	15.0529	-2.01048	0.00037607	-1.98607	17	44299574	44315315							1
ENSG00000251026	LINC02163	long intergenic non-protein coding RNA 2163	2.06205	8.20682	-2.01456	0.00393828	-1.99274	5	104079911	104105403			1				0
ENSG00000141293	SKAP1	src kinase associated phosphoprotein 1	1.70309	6.86167	-2.02102	0.0109087	-2.01041	17	48133440	48430275							1
ENSG00000246705	H2AFJ	H2A histone family member J	3.09308	12.5039	-2.01408	0.000745195	-2.01526	12	14774383	14778002							1
ENSG00000232771	PPP1R26P5	protein phosphatase 1 regulatory subunit 26 pseudogene 5	1.45918	5.91045	-2.13189	0.0164752	-2.01811	22	21341595	21345258	1						0
ENSG00000134779	TPGS2	tubulin polyglutamylase complex subunit 2	23.7733	97.1947	-2.02526	3.1515e-20	-2.03154	18	36777647	36829216							1
ENSG00000239203	AC093484.1	NA /// transient receptor potential cation channel subfamily V member 2 #or# NA	1.72602	7.13287	-2.07285	0.00870337	-2.04703	17	16427474	16428719							1
ENSG00000272192	AC100812.1		1.33247	5.50691	-2.00005	0.0302217	-2.04715	8	65842752	65843331		1					0
ENSG00000161610	HCRT	hypocretin neuropeptide precursor	6.08453	25.2353	-1.978	5.40152e-06	-2.05222	17	42184060	42185452							1
ENSG00000198417	MT1F	metallothionein 1F	3.52123	14.7314	-2.08993	0.000209077	-2.06474	16	56657694	56660698							1
ENSG00000274911	AL627230.2		2.49021	10.4602	-2.16236	0.00103419	-2.07057	9	67725890	67726544		1					0
ENSG00000101489	CELF4	CUGBP Elav-like family member 4	12.096	50.9363	-2.07203	1.03976e-11	-2.07417	18	37243047	37566037							1
ENSG00000273077	AC110609.1		2.11958	8.99761	-2.11598	0.00303097	-2.08576	4	128552590	128553416		1					0
ENSG00000237243	AC022173.1		2.15418	9.18614	-2.12711	0.00267079	-2.09232	7	137953348	137957966		1					0
ENSG00000176340	COX8A	cytochrome c oxidase subunit 8A	1.24034	5.31178	-1.99256	0.0351815	-2.09846	11	63974607	63976543							1
ENSG00000237863	AL035425.1		3.70762	15.8785	-2.10944	4.21406e-05	-2.09851	0	108736011	108738903		1					0
ENSG00000178726	THBD	thrombomodulin	5.14562	22.1696	-2.03695	5.05281e-06	-2.10717	20	23045633	23049741							1
ENSG00000278970	HEIH	hepatocellular carcinoma up-regulated EZH2-associated long non-coding RNA	1.06562	4.60895	-2.15479	0.0322796	-2.11274	5	180829954	180831605							1
ENSG00000101255	TRIB3	tribbles pseudokinase 3	10.4755	45.6443	-2.09125	5.12569e-07	-2.12342	20	362835	397559							1
ENSG00000230005	SNAP47-AS1	SNAP47 antisense RNA 1	0.996434	4.40421	-2.08922	0.0391958	-2.14404	1	227743831	227747191							1
ENSG00000197980	LEKR1	leucine, glutamate and lysine rich 1	5.20315	23.0299	-2.08517	1.53757e-06	-2.14605	3	156825481	157046129							1
ENSG00000280322	AL035425.4		1.48211	6.65693	-2.27618	0.00915585	-2.1672	0	108725886	108726948		1					0
ENSG00000265055	AC145343.1		1.87781	8.47802	-2.08674	0.00994746	-2.17467	17	68096046	68101474		1					0
ENSG00000134775	FHOD3	formin homology 2 domain containing 3	5.97685	27.1658	-2.20465	3.02692e-07	-2.18433	18	36297714	36780055							1
ENSG00000120594	PLXDC2	plexin domain containing 2	8.06398	36.8197	-2.17502	8.10413e-10	-2.19091	10	19816239	20289856							1
ENSG00000198326	AL035460.1	NA /// transmembrane protein 239 #or# NA	1.61097	7.39681	-2.11587	0.00940159	-2.19898	20	2816302	2820284							1
ENSG00000211698	TRGV4	T cell receptor gamma variable 4	1.27494	5.87209	-2.12167	0.0142192	-2.20345	7	38353715	38354517							1
ENSG00000168267	PTF1A	pancreas associated transcription factor 1a	2.63034	12.2362	-2.13973	0.000522277	-2.21784	10	23192327	23194252							1
ENSG00000243321	LINC01998	long intergenic non-protein coding RNA 1998	2.24844	10.4625	-2.12298	0.00174454	-2.21823	3	150077494	150080117			1				0
ENSG00000145945	FAM50B	family with sequence similarity 50 member B	2.2463	10.6672	-2.34978	0.000800152	-2.24756	6	3849386	3851317							1
ENSG00000228478	AL138885.2		1.42459	6.7988	-2.29671	0.00863682	-2.25474	6	10423140	10426176		1					0
ENSG00000250654	AC023794.5		2.69952	12.9953	-2.24405	0.000180446	-2.26722	12	54076838	54081903		1					0
ENSG00000197665	AC007952.1		0.938906	4.53354	-2.16656	0.0333882	-2.27158	17	19155727	19159111		1					0
ENSG00000261538	AC096996.2	NA /// ATP binding cassette subfamily C member 11 #or# NA	1.6339	7.93261	-2.20831	0.00436272	-2.27947	16	48164952	48167238							1
ENSG00000274727	AL137028.1		2.11958	10.3309	-2.35413	0.00110655	-2.28511	20	64327418	64327972		1					0
ENSG00000237637	FRY-AS1	FRY antisense RNA 1	0.938906	4.58085	-2.22082	0.025453	-2.28656	13	32025314	32031639							1
ENSG00000266824	AC129492.4		1.03103	5.06274	-2.31087	0.0193849	-2.29583	17	8176812	8182812		1					0
ENSG00000233026	MTCO1P5	mitochondrially encoded cytochrome c oxidase I pseudogene 5	2.2463	11.0755	-2.31166		-2.30175	3	12165299	12165642	1						0
ENSG00000260552	AC023043.1		2.3289	11.4928	-2.27366	0.000427789	-2.30301	18	36179996	36187448		1					0
ENSG00000245060	LINC00847	long intergenic non-protein coding RNA 847	1.30953	6.48029	-2.21116	0.0105485	-2.30701	5	180830957	180835726			1				0
ENSG00000134757	DSG3	desmoglein 3	1.03103	5.11599	-2.31842	0.0153758	-2.31093	18	31447795	31478702							1
ENSG00000280380	AC009831.4		0.938906	4.66881	-2.18232	0.0288275	-2.314	18	31982899	31986087		1					0
ENSG00000234284	ZNF879	zinc finger protein 879	3.11602	15.9413	-2.36777	3.15015e-05	-2.35499	5	179023752	179035064							1
ENSG00000279143	AC139099.4		0.973499	4.98732	-2.3085	0.0210788	-2.35701	17	83132647	83136150		1					0
ENSG00000175065	DSG4	desmoglein 4	1.87567	9.66208	-2.46497	0.00119959	-2.36492	18	31376777	31414912							1
ENSG00000149531	FRG1BP	FSHD region gene 1 family member B, pseudogene	1.6339	8.44626	-2.30653	0.00382251	-2.36999	20	30377372	30399257	1						0
ENSG00000276538	AC092666.2		0.938906	4.87355	-2.26684	0.0308445	-2.37592	7	150047609	150047854		1					0
ENSG00000188459	WASF4P	WAS protein family member 4, pseudogene	1.00809	5.28303	-2.38257	0.0223627	-2.38974	0	47803296	47804789	1						0
ENSG00000260075	NSFP1	N-ethylmaleimide-sensitive factor pseudogene 1	1.33247	7.01909	-2.3612	0.00564959	-2.39719	17	46372855	46487141	1						0
ENSG00000172460	PRSS30P	serine protease 30, pseudogene	5.73508	30.3956	-2.40878	2.51347e-08	-2.40598	16	2839568	2842744	1						0
ENSG00000215905	AL590609.1		0.938906	5.04058	-2.33164	0.0296985	-2.42454	1	24007881	24008519		1					0
ENSG00000264769	AC145207.8		0.938906	5.10704	-2.32852	0.019276	-2.44343	17	81922899	81924511		1					0
ENSG00000260470	AC023794.7		2.07371	11.4018	-2.48374	0.000249073	-2.45898	12	54145069	54147225		1					0
ENSG00000255027	AP000842.2	NA /// pseudouridylate synthase 3 #or# NA	0.694997	3.85286	-2.47143	0.0335188	-2.47085	11	125903247	125938916							1
ENSG00000206597	SNORA57	small nucleolar RNA, H/ACA box 57 #or# citrate synthase lysine methyltransferase	1.12315	6.30438	-2.65047	0.00697082	-2.48881	11	62665422	62665570					1		0
ENSG00000204710	SPDYC	speedy/RINGO cell cycle regulator family member C	1.91027	10.7625	-2.67902	0.000287598	-2.49417	11	65170154	65173244							1
ENSG00000272494	OR1X1P	olfactory receptor family 1 subfamily X member 1 pseudogene	2.51314	14.2902	-2.5869	3.76161e-05	-2.50747	5	176006145	176007387	1						0
ENSG00000233840	PCDH9-AS4	PCDH9 antisense RNA 4	0.938906	5.35543	-2.35861	0.016543	-2.51195	13	66990886	67002007							1
ENSG00000237849	NFYAP1	nuclear transcription factor Y subunit alpha pseudogene 1	0.996434	5.71466	-2.51355	0.0123468	-2.51982	13	63975451	63976422	1						0
ENSG00000276747	PADI6	peptidyl arginine deiminase 6	1.00809	5.83137	-2.48694	0.0133061	-2.53221	1	17372196	17401699							1
ENSG00000237775	DDR1-DT	DDR1 divergent transcript	2.36349	13.679	-2.53731	5.16163e-05	-2.53297	6	30866982	30875918							1
ENSG00000226334	AL359182.1		0.637469	3.70204	-2.45829	0.0428778	-2.53789	9	104927553	104928892		1					0
ENSG00000105610	KLF1	Kruppel like factor 1	1.36706	8.03017	-2.53034	0.00253312	-2.55436	19	12884422	12887199							1
ENSG00000203877	RIPPLY2	ripply transcriptional repressor 2	4.64652	27.4371	-2.53087	9.61328e-09	-2.5619	6	83853266	83857515							1
ENSG00000229415	SFTA3	surfactant associated 3 #or# NA /// surfactant associated 3	2.09665	12.5541	-2.58302	0.000188618	-2.582	14	36473288	36513829							1
ENSG00000128709	HOXD9	homeobox D9	1.81814	10.8978	-2.69396	0.000272061	-2.58349	2	176122720	176124937							1
ENSG00000282164	PEG13	paternally expressed 13	5.90766	35.5374	-2.62116	1.85794e-10	-2.58868	8	140094894	140100560							1
ENSG00000231742	LINC01273	long intergenic non-protein coding RNA 1273	1.64556	10.614	-2.62896	0.000471189	-2.68931	20	50172550	50176671			1				0
ENSG00000273032	DGCR9	DiGeorge syndrome critical region gene 9 (non-protein coding)	0.637469	4.13367	-2.63514	0.0313971	-2.697	22	19017834	19020248							1
ENSG00000268505	AC135012.3		0.637469	4.17137	-2.64261	0.0231799	-2.7101	16	86192793	86198913		1					0
ENSG00000215464	AP000354.1		0.938906	6.30071	-2.61524	0.0066225	-2.74646	22	24269346	24270134		1					0
ENSG00000250874	AC010595.1		2.30596	15.5947	-2.70956	1.71419e-05	-2.75761	5	85663232	85664684		1					0
ENSG00000225417	AL049648.1		0.602876	4.11152	-2.64177	0.024527	-2.76974	20	20214299	20215262		1					0
ENSG00000224825	RORB-AS1	RORB antisense RNA 1	0.996434	6.89042	-2.76229	0.00370376	-2.78975	9	74485551	74499127							1
ENSG00000284675	AC116667.2		0.393559	2.75016	-2.88382	0.0429239	-2.80486	16	73123296	73137580		1					0
ENSG00000229031	MTCO1P25	mitochondrially encoded cytochrome c oxidase I pseudogene 25	6.57758	46.6137	-2.83362		-2.82513	7	69331835	69333633	1						0
ENSG00000178193	AL357314.1		0.393559	2.79446	-2.88536	0.0364049	-2.82792	1	75710003	75724011		1					0
ENSG00000273348	AC027449.1		0.637469	4.66881	-2.77032	0.0215868	-2.87263	18	22347846	22348252		1					0
ENSG00000258314	AL589182.1		2.82624	20.8999	-2.93418	2.62476e-07	-2.88654	14	19024090	19055551		1					0
ENSG00000272801	AC004080.5	NA /// homeobox A3 #or# NA /// homeobox A3 #or# NA #or# NA	1.06562	7.88896	-2.95998	0.00124996	-2.88814	7	27147366	27152598							1
ENSG00000225407	AC025188.1		0.393559	2.92379	-2.99165	0.0386847	-2.89319	5	76691439	76716215		1					0
ENSG00000253792	AC025437.5		0.336031	2.51732	-2.82101	0.0465492	-2.90522	5	158173601	158176422		1					0
ENSG00000236894	AL160287.1		0.393559	2.9615	-2.99945	0.0241445	-2.91168	10	26577676	26622338		1					0
ENSG00000279715	AL161912.4		0.996434	7.58006	-2.9145	0.00174648	-2.92736	9	79913269	79915736		1					0
ENSG00000279880	AC134407.3		0.336031	2.61489	-2.84618	0.0455305	-2.96008	17	67973934	67976072		1					0
ENSG00000268532	LINC02135	long intergenic non-protein coding RNA 2135	0.336031	2.63704	-2.85105	0.0387284	-2.97225	16	86286427	86293389			1				0
ENSG00000171056	SOX7	SRY-box 7	1.27494	10.0242	-2.85929	0.000601154	-2.97499	8	10723768	10730512							1
ENSG00000226291	AC091729.2		0.729589	5.79366	-3.05587	0.00821396	-2.98932	7	1080863	1082178		1					0
ENSG00000251676	SNHG27	small nucleolar RNA host gene 27	0.602876	4.96517	-2.89909	0.0129121	-3.04191	4	131773302	131791482							1
ENSG00000275026	GXYLT1P4	glucoside xylosyltransferase 1 pseudogene 4	0.301438	2.56097	-2.75183	0.0497369	-3.08676	9	66022661	66027719	1						0
ENSG00000266605	LONRF2P1	LON peptidase N-terminal domain and ring finger 2 pseudogene 1	0.637469	5.47882	-3.03434	0.00722214	-3.10344	18	14450216	14450883	1						0
ENSG00000196711	ALKAL1	ALK and LTK ligand 1	1.51671	13.342	-3.26769	3.26394e-05	-3.13696	8	52534037	52565507							1
ENSG00000274252	GGTLC3	gamma-glutamyltransferase light chain family member 3	0.336031	2.97111	-3.054	0.0430157	-3.14434	22	18516344	18518161							1
ENSG00000169508	GPR183	G protein-coupled receptor 183	0.336031	2.97705	-3.00858	0.0311001	-3.14722	13	99294530	99307405							1
ENSG00000234576	MTND1P26	mitochondrially encoded NADH:ubiquinone oxidoreductase core subunit 1 pseudogene 26	3.64795	32.5457	-3.16338		-3.15731	2	131385700	131386237	1						0
ENSG00000132965	ALOX5AP	arachidonate 5-lipoxygenase activating protein	0.301438	2.77231	-2.8857	0.0401012	-3.20116	13	30713478	30764426							1
ENSG00000214185	XPOTP1	exportin for tRNA pseudogene 1	0.393559	3.67988	-3.33456	0.0120395	-3.22501	20	34213495	34215892	1						0
ENSG00000267397	AC090229.1		0.301438	2.81963	-2.97551	0.0294176	-3.22557	18	35716370	35717978		1					0
ENSG00000156925	ZIC3	Zic family member 3	5.75587	53.9302	-3.31095	9.32767e-17	-3.22799	0	137566142	137577691							1
ENSG00000226317	LINC00351	long intergenic non-protein coding RNA 351	1.40165	13.3899	-3.3095	2.52398e-05	-3.25595	13	85363601	85544570			1				0
ENSG00000180613	GSX2	GS homeobox 2	1.03103	10.1033	-3.31106	0.00027772	-3.29267	4	54099523	54102505							1
ENSG00000265282	AC005828.4		0.694997	6.91559	-3.3786	0.00240818	-3.31477	17	63430468	63432211		1					0
ENSG00000261409	AL035425.3		3.51172	35.0998	-3.24638	1.16434e-10	-3.32121	0	108719949	108724944		1					0
ENSG00000231934	LINC01598	long intergenic non-protein coding RNA 1598	0.301438	3.03691	-3.02474	0.0340761	-3.33267	20	30323812	30361730			1				0
ENSG00000233577	AL022332.1		0.637469	6.5276	-3.25995	0.00539151	-3.35613	22	25279529	25282674		1					0
ENSG00000249815	AC004704.1		0.301438	3.10638	-3.10164	0.0262358	-3.3653	4	111826881	112072698		1					0
ENSG00000262881	CR936218.2		0.602876	6.45219	-3.25285	0.00457496	-3.41986	17	45907670	45910779		1					0
ENSG00000256116	AP001453.1		0.393559	4.21869	-3.57286	0.007771	-3.42214	11	64229214	64234352		1					0
ENSG00000267201	LINC01775	long intergenic non-protein coding RNA 1775	0.336031	3.99774	-3.44617	0.011339	-3.57252	19	2458935	2462185			1				0
ENSG00000261666	LINC00560	long intergenic non-protein coding RNA 560	0.301438	3.59787	-3.31875	0.015315	-3.57721	13	88626853	88630397			1				0
ENSG00000154611	PSMA8	proteasome subunit alpha 8	0.301438	3.85286	-3.37023	0.0146013	-3.676	18	26133852	26193355							1
ENSG00000262098	AC127496.2		0.336031	4.3665	-3.55635	0.00979705	-3.69981	17	81023545	81025503		1					0
ENSG00000225815	AC092669.1		0.336031	4.40421	-3.55678	0.00664158	-3.71222	2	66327349	66328984		1					0
ENSG00000229578	LINC00358	long intergenic non-protein coding RNA 358	0.336031	4.51138	-3.62309	0.00432654	-3.74691	13	62003525	62029548			1				0
ENSG00000080618	CPB2	carboxypeptidase B2	0.301438	4.0953	-3.46292	0.0096557	-3.76404	13	46053195	46105033							1
ENSG00000157021	FAM92A1P1	family with sequence similarity 92 member A1 pseudogene 1	0.393559	5.45666	-3.91138	0.00274196	-3.79337	15	41163162	41164374	1						0
ENSG00000235659	AL391987.4		0.301438	4.40421	-3.56122	0.00805299	-3.86895	9	61865755	61866965		1					0
ENSG00000255402	AC027451.1		0.336031	5.34949	-3.8605	0.00256882	-3.99274	8	109973943	109974781		1					0
ENSG00000197358	BNIP3P1	BCL2 interacting protein 3 pseudogene 1	0.602876	10.8535	-4.03014	0.000191297	-4.17015	14	28264390	28265974	1						0
ENSG00000261804	AC007342.4		0.336031	8.96951	-4.61854	0.000180938	-4.73836	16	53373493	53384745		1					0
ENSG00000250894	PRAMEF31P	PRAME family member 31, pseudogene	0	2.38799	-3.66659	0.0129485	?	1	13245863	13248652	1						0
ENSG00000235665	LINC00298	long intergenic non-protein coding RNA 298	0	2.78192	-3.91018	0.0112985	?	2	7922425	8278084			1				0
ENSG00000218682	AC064847.1		0	2.4634	-3.69979	0.0280509	?	2	25856461	25856966		1					0
ENSG00000265892	RN7SL311P	RNA, 7SL, cytoplasmic 311, pseudogene	0	2.35029	-3.64689	0.0404993	?	4	139185441	139185746	1						0
ENSG00000249684	AC106795.2		0	2.50771	-3.7071	0.0155051	?	5	177950335	177963960		1					0
ENSG00000205653	AL035696.1		0	2.28082	-3.56039	0.0253003	?	6	203313	206392		1					0
ENSG00000239719	AC004890.1		0	2.21502	-3.5842	0.041087	?	7	149191043	149191223		1					0
ENSG00000234286	AC006026.3		0	2.13895	-3.50621	0.0269796	?	7	23680195	23680786		1					0
ENSG00000254205	AC009686.1		0	2.67474	-3.82337	0.00921705	?	8	80122852	80127670		1					0
ENSG00000276412	AL591926.3		0	2.45746	-3.75307	0.0134572	?	9	41651935	41652172		1					0
ENSG00000278992	AC012048.1		0	2.31258	-3.64966	0.00766765	?	10	76270206	76270800		1					0
ENSG00000254746	AC103855.2		0	2.50771	-3.71118	0.0204916	?	11	45489689	45542474		1					0
ENSG00000255051	BCAS2P1	BCAS2, pre-mRNA processing factor pseudogene 1	0	2.22096	-3.53529	0.0240304	?	11	83132056	83134737	1						0
ENSG00000256044	AC026333.2		0	2.41015	-3.67125	0.0128984	?	12	122749481	122749586		1					0
ENSG00000215357	HSPD1P8	heat shock protein family D (Hsp60) member 1 pseudogene 8	0	2.12339	-3.49669	0.0139495	?	13	78849231	78851208	1						0
ENSG00000258922	AC106028.2		0	2.61489	-3.80503	0.0116515	?	15	92805770	92808567		1					0
ENSG00000271078	AC139426.3		0	2.44785	-3.68982	0.0265687	?	15	32250302	32256125		1					0
ENSG00000276393	AC105429.2		0	2.55503	-3.77882	0.0233305	?	16	87467138	87467654		1					0
ENSG00000266392	MIR4740	microRNA 4740	0	2.35029	-3.65264	0.0143652	?	17	81400716	81400778				1			0
ENSG00000263815	RN7SL426P	RNA, 7SL, cytoplasmic 426, pseudogene	0	2.28082	-3.56129	0.0262964	?	17	21229334	21229628	1						0
ENSG00000263368	AC069366.1		0	3.88462	-4.38065	0.00192974	?	17	27526386	27527223		1					0
ENSG00000279077	AC023090.2		0	3.71759	-4.30304	0.00144752	?	18	79352458	79354567		1					0
ENSG00000252211	RNA5SP473	RNA, 5S ribosomal pseudogene 473	0	2.62083	-3.7471	0.0124835	?	19	58363438	58363562	1						0
ENSG00000276095	LINC01663	long intergenic non-protein coding RNA 1663 /// long intergenic non-protein coding RNA 1663 #or# NA	0	2.80407	-3.92086	0.00736739	?	22	18873543	18894407			1				0
ENSG00000232603	AC245291.3		0	3.56611	-4.22832	0.00419264	?	22	22370829	22371120		1					0
ENSG00000238116	Z95327.1		0	2.47	-3.6906	0.0137469	?	0	100801188	100803060		1					0
