# Supplementary material for: The role of reciprocal fusions in MLL-r acute leukemia: studying the chromosomal translocation t(6;11)
Source: Oncogene. 2021 Aug 5;40(40):5902–12. doi: 10.1038/s41388-021-01983-3 (PMC8497272; doi:10.1038/s41388-021-01983-3)
Supplement: Supplementary file 11 — ATAC-Seq exMLL-AF6 [file 41388_2021_1983_MOESM11_ESM.xlsx]

## Sheet: Sheet1
ID	gene symbol	gene	mean exp	mean mock	log2	pvalue	var-log2	chrom	begin	end	PG	NA	LINC	MIR	SNO	MT	PCG
ENSG00000234775	AC105940.2		3.3232	0.226893	3.52686	0.0171381	3.87249	1	203127259	203127954		1					0
ENSG00000283361	CFAP97D2	CFAP97 domain containing 2	3.71137	0.264599	3.6666	0.00725972	3.81007	13	114154691	114223084							1
ENSG00000270532	PEBP1P2	phosphatidylethanolamine binding protein 1 pseudogene 2	3.0624	0.226893	3.4059	0.0389879	3.75458	2	85341281	85341838	1						0
ENSG00000187823	RTL4	retrotransposon Gag like 4	2.85929	0.226893	3.29286	0.0271443	3.65557	0	112454500	112457112							1
ENSG00000179144	GIMAP7	GTPase, IMAP family member 7	2.83816	0.226893	3.28456	0.0234583	3.64487	7	150514830	150521073							1
ENSG00000254229	FAM90A12P	family with sequence similarity 90 member A12, pseudogene	3.30206	0.264599	3.52484	0.00932455	3.64149	8	8027077	8032305	1						0
ENSG00000257846	AL512310.6		2.78047	0.226893	3.26753	0.0328651	3.61524	14	19668829	19670003		1					0
ENSG00000232551	MTCO1P14	mitochondrially encoded cytochrome c oxidase I pseudogene 14	2.73192	0.226893	3.25515	0.0228713	3.58983	1	106804474	106806032	1						0
ENSG00000270359	AL358335.3		3.12923	0.264599	3.42907	0.0352667	3.56393	14	48319068	48319394		1					0
ENSG00000235522	AC010978.1		2.59564	0.226893	3.14561	0.0331169	3.516	2	105846534	105857177		1					0
ENSG00000182050	AC010196.1	NA /// MGAT4 family member C #or# NA	2.55908	0.226893	3.1335	0.0300929	3.49554	12	85955666	86838904							1
ENSG00000219932	RPL12P8	ribosomal protein L12 pseudogene 8	2.52881	0.226893	3.12535	0.0446309	3.47837	10	67874332	67874911	1						0
ENSG00000198452	OR14L1P	olfactory receptor family 14 subfamily L member 1 pseudogene	2.51967	0.226893	3.12224	0.0495956	3.47315	1	247617143	247622372	1						0
ENSG00000264270	AC087749.1		2.49854	0.226893	3.11371	0.0483586	3.461	17	75683543	75684799		1					0
ENSG00000156575	PRG3	proteoglycan 3, pro eosinophil major basic protein 2	2.48026	0.226893	3.10958	0.0331642	3.4504	11	57376769	57381150							1
ENSG00000226818	SLC6A6P1	solute carrier family 6 member 6 pseudogene 1	2.88671	0.264599	3.29839	0.0226654	3.44755	21	19244543	19246392	1						0
ENSG00000256551	LINC02369	long intergenic non-protein coding RNA 2369	2.47112	0.226893	3.10419	0.0465988	3.44508	12	128086985	128118132			1				0
ENSG00000214866	DCDC2C	doublecortin domain containing 2C	2.85016	0.264599	3.2883	0.0224744	3.42916	2	3703592	3847411							1
ENSG00000248231	KRT8P4	keratin 8 pseudogene 4	2.83816	0.264599	3.28526	0.0256664	3.42308	8	89412621	89415071	1						0
ENSG00000226938	AC119428.1		2.81988	0.264599	3.28132	0.0362666	3.41375	1	53348488	53349233		1					0
ENSG00000243107	AC000120.1		2.81074	0.264599	3.2769	0.0219255	3.40907	7	92200014	92206857		1					0
ENSG00000215417	MIR17	miR-17-92a-1 cluster host gene #or# microRNA 17	2.77133	0.264599	3.26542	0.0259953	3.3887	13	91347820	91354579				1			0
ENSG00000258733	LINC02328	long intergenic non-protein coding RNA 2328	2.77133	0.264599	3.26465	0.0326321	3.3887	14	85934710	86129778			1				0
ENSG00000284681	AC007240.1		2.62591	0.264599	3.1615	0.0433365	3.31094	2	10122739	10199288		1					0
ENSG00000222030	LINC01793	long intergenic non-protein coding RNA 1793	2.57736	0.264599	3.14432	0.0485829	3.28402	2	59217708	59279400			1				0
ENSG00000183632	TP53TG3	TP53 target 3	2.55908	0.264599	3.13497	0.0349361	3.27375	16	32673528	32676732							1
ENSG00000278949	AC127070.4		2.53795	0.264599	3.12841	0.0430657	3.26178	12	132865855	132867958		1					0
ENSG00000278530	CHMP1B2P	charged multivesicular body protein 1B2, pseudogene	4.66945	0.491492	3.15476	0.0075578	3.24801	0	80228489	80335364	1						0
ENSG00000143954	REG3G	regenerating family member 3 gamma	3.08068	0.324458	3.41152	0.0187631	3.24714	2	79025686	79028505							1
ENSG00000279578	AC004899.2		2.4894	0.264599	3.11069	0.0453216	3.23392	7	48847766	48851625		1					0
ENSG00000259868	AL163952.1		2.47112	0.264599	3.10425	0.0462395	3.22329	14	55896547	55962970		1					0
ENSG00000225579	EDNRB-AS1	EDNRB antisense RNA 1	2.86843	0.324458	3.30054	0.0461298	3.14416	13	77828222	77833950							1
ENSG00000281386	AP003500.2		2.85929	0.324458	3.2961	0.0394957	3.13956	11	129591493	129612110		1					0
ENSG00000266729	DSG1-AS1	DSG1 antisense RNA 1	2.82902	0.324458	3.28129	0.0209432	3.1242	18	31343368	31426988							1
ENSG00000203663	OR2L2	olfactory receptor family 2 subfamily L member 2	2.29543	0.264599	2.96877	0.0417295	3.11688	1	248030070	248042305							1
ENSG00000282843	AL590644.3		2.27715	0.264599	2.96494	0.0479352	3.10535	1	17193232	17201733		1					0
ENSG00000215354	FAM90A24P	family with sequence similarity 90 member A24, pseudogene	3.89334	0.453786	2.90249	0.0194058	3.10092	8	8019429	8024652	1						0
ENSG00000223940	KRT8P8	keratin 8 pseudogene 8	4.01158	0.491492	2.91261	0.0200201	3.02893	0	152479577	152481024	1						0
ENSG00000259977	AL121578.3		2.14064	0.264599	2.92784	0.035526	3.01616	0	37906147	37949405		1					0
ENSG00000095110	NXPE1	neurexophilin and PC-esterase domain family member 1	3.94475	0.491492	2.89509	0.0173487	3.00469	11	114521645	114559895							1
ENSG00000240457	RN7SL472P	RNA, 7SL, cytoplasmic 472, pseudogene	2.55908	0.324458	3.13446	0.0331067	2.97952	14	102077180	102077472	1						0
ENSG00000275011	AC129492.6		2.51967	0.324458	3.12168	0.0294495	2.95713	17	8063936	8072533		1					0
ENSG00000165841	CYP2C19	cytochrome P450 family 2 subfamily C member 19 /// cytochrome P450 family 2 subfamily C member 19 #or# NA	3.41116	0.453786	2.70941	0.038791	2.91018	10	94762681	94853205							1
ENSG00000139151	PLCZ1	phospholipase C zeta 1	3.69309	0.491492	2.80219	0.0295543	2.90959	12	18683169	18738057							1
ENSG00000249859	MIR1204	Pvt1 oncogene (non-protein coding) #or# microRNA 1204	2.43171	0.324458	3.08891	0.0494775	2.90587	8	127794533	128101253				1			0
ENSG00000284234	AC106774.6		3.81737	0.551351	2.84269	0.0384475	2.79154	5	17525235	17525831		1					0
ENSG00000133636	NTS	neurotensin	3.76596	0.551351	2.8368	0.0269759	2.77197	12	85874295	85882992							1
ENSG00000279532	AC002094.5		3.63254	0.551351	2.76509	0.0245764	2.71994	17	28373673	28374301		1					0
ENSG00000197428	OR51D1	olfactory receptor family 51 subfamily D member 1	5.05762	0.793797	2.6561	0.00806758	2.67162	11	4637477	4643060							1
ENSG00000249484	LINC01470	long intergenic non-protein coding RNA 1470	4.27523	0.68068	2.45324	0.0262064	2.65096	5	152618965	153223543			1				0
ENSG00000166265	CYYR1	cysteine and tyrosine rich 1	3.39916	0.551351	2.6589	0.0387767	2.62414	21	26466209	26573284							1
ENSG00000229022	AL365366.1		3.34433	0.551351	2.64428	0.0485726	2.60067	1	241831935	241832787		1					0
ENSG00000228663	PSMD10P1	proteasome 26S subunit, non-ATPase, 10 pseudogene 1	3.2655	0.551351	2.6255	0.0438212	2.56626	20	50913731	50914411	1						0
ENSG00000269220	LINC00528	long intergenic non-protein coding RNA 528	6.03397	1.04284	2.52033	0.00476886	2.53259	22	17777322	17779481			1				0
ENSG00000229817	AL133412.1		3.36261	0.589057	2.62468	0.0471349	2.5131	9	114845594	114848585		1					0
ENSG00000239389	PCDHA13	protocadherin alpha 13	3.25351	0.589057	2.60475	0.0404611	2.46552	5	140882208	141012344							1
ENSG00000274553	AC138035.3		4.20555	0.793797	2.39148	0.0173719	2.40545	5	181329049	181331839		1					0
ENSG00000234653	AC079117.1		3.94189	0.756091	2.30948	0.0334388	2.38226	2	76985965	77009791		1					0
ENSG00000278952	AP003068.4		4.72714	0.907573	2.19405	0.0208275	2.38088	11	65118310	65119111		1					0
ENSG00000231236	AP001605.1		3.03212	0.589057	2.49483	0.0485888	2.36385	21	27358885	27448579		1					0
ENSG00000237399	PITRM1-AS1	PITRM1 antisense RNA 1 /// PITRM1 antisense RNA 1 #or# NA	7.50156	1.47448	2.23666	0.00549499	2.34699	10	3141632	3167972							1
ENSG00000240253	AC140481.3	NA /// cytochrome P450 family 4 subfamily F member 30, pseudogene #or# NA /// fatty acyl-CoA reductase 2 pseudogene 3 #or# NA	4.78769	0.945279	2.20123	0.0261018	2.34052	2	130690133	130718831	1						0
ENSG00000154227	CERS3	ceramide synthase 3	6.12194	1.24758	2.21898	0.00887832	2.29485	15	100400395	100544995							1
ENSG00000204086	RPA4	replication protein A4	3.81737	0.778244	2.28228	0.0479456	2.29428	0	96883908	96885467							1
ENSG00000255428	AP002008.3		3.58399	0.756091	2.18591	0.0395962	2.24493	11	111414242	111418186		1					0
ENSG00000284748	AL513220.1		10.0061	2.11745	2.10807	0.00190792	2.24049	1	37596126	37607336		1					0
ENSG00000166603	MC4R	melanocortin 4 receptor	3.64168	0.778244	2.19457	0.0399461	2.22631	18	60371110	60372775							1
ENSG00000166863	TAC3	tachykinin 3 #or# myosin IA /// tachykinin 3	4.21468	0.907573	2.02116	0.0349447	2.21534	12	57010000	57028883							1
ENSG00000280025	AL008638.6		3.66282	0.793797	2.18789	0.0366094	2.20611	22	27102766	27107019		1					0
ENSG00000232716	AC016831.3		3.91447	0.853656	2.2668	0.0442603	2.19709	7	130840204	130843725		1					0
ENSG00000242265	PEG10	paternally expressed 10	5.85201	1.28529	2.14257	0.00815838	2.18684	7	94656325	94669695							1
ENSG00000248472	DDX11L9	DEAD/H-box helicase 11 like 9	6.78291	1.49663	2.09624	0.00716606	2.18019	15	101976558	101979093							1
ENSG00000118058	KMT2A	lysine methyltransferase 2A	143.645	32.2381	2.17266	1.02027e-26	2.15566	11	118436490	118526832							1
ENSG00000156219	ART3	ADP-ribosyltransferase 3	3.34433	0.756091	2.07728	0.0485332	2.14509	4	76011184	76112802							1
ENSG00000169908	TM4SF1	transmembrane 4 L six family member 1	4.4452	1.02069	2.07393	0.0314961	2.1227	3	149369022	149377865							1
ENSG00000281778	LINC00550	long intergenic non-protein coding RNA 550	7.06484	1.6319	2.13093	0.00756168	2.1141	13	68861284	68885325			1				0
ENSG00000005981	ASB4	ankyrin repeat and SOCS box containing 4	3.5263	0.81595	2.1624	0.0385246	2.1116	7	95478444	95540232							1
ENSG00000261460	AC009690.2		4.49376	1.04284	2.07847	0.0268645	2.1074	15	72278867	72351794		1					0
ENSG00000230612	AC004039.1		4.28151	1.02069	1.9986	0.03495	2.06858	5	132688681	132723725		1					0
ENSG00000250745	USP17L20	ubiquitin specific peptidase 17-like family member 20	4.2541	1.02069	1.99402	0.0344344	2.05931	4	9258124	9260075							1
ENSG00000254235	AC022784.6		3.39002	0.81595	2.07145	0.0496943	2.05474	8	9249417	9413714		1					0
ENSG00000248933	USP17L22	ubiquitin specific peptidase 17-like family member 22	6.49184	1.57204	2.01899	0.0103592	2.04599	4	9267619	9269570							1
ENSG00000249482	USP17L14P	ubiquitin specific peptidase 17-like family member 14, pseudogene	4.10844	1.02069	1.97118	0.0418287	2.00905	4	9229641	9231233	1						0
ENSG00000278254	AC004852.2		6.21904	1.54989	1.95875	0.0158034	2.00453	7	9082557	9189857		1					0
ENSG00000237686	AL109615.3		6.26736	1.57204	1.99556	0.00794276	1.99522	6	43995723	44074652		1					0
ENSG00000228430	AL162726.3		5.12445	1.3296	1.93429	0.0274978	1.94641	9	81977614	82780194		1					0
ENSG00000170356	OR2A20P	olfactory receptor family 2 subfamily A member 20 pseudogene /// olfactory receptor family 2 subfamily A member 20 pseudogene #or# NA	4.89083	1.26974	1.91192	0.026915	1.94555	7	144250045	144256244	1						0
ENSG00000280205	AC009716.2		4.41779	1.17811	2.02627	0.0360718	1.90685	18	76385642	76389406		1					0
ENSG00000130396	AFDN	afadin, adherens junction formation factor	110.655	29.6426	1.87271	1.98243e-20	1.90033	6	167826922	167972023							1
ENSG00000234336	JAZF1-AS1	JAZF1 antisense RNA 1	7.28336	1.96597	1.79795	0.0133125	1.88936	7	28180322	28243917							1
ENSG00000181965	NEUROG1	neurogenin 1	5.33955	1.44271	1.97553	0.0195096	1.88793	5	135534282	135535949							1
ENSG00000153165	RGPD3	RANBP2-like and GRIP domain containing 3	5.291	1.43677	1.75955	0.0288779	1.88071	2	106391290	106468376							1
ENSG00000165568	AKR1E2	aldo-keto reductase family 1 member E2	4.80596	1.30744	1.84892	0.0372153	1.87808	10	4786629	4848062							1
ENSG00000109132	PHOX2B	paired like homeobox 2b	5.62776	1.53434	1.82283	0.02284	1.87495	4	41744082	41748970							1
ENSG00000260460	AL365181.1		4.56344	1.24758	1.77502	0.0394268	1.87099	1	156509854	156511681		1					0
ENSG00000165606	DRGX	dorsal root ganglia homeobox	5.79146	1.59419	1.86829	0.0249204	1.8611	10	49364181	49396016							1
ENSG00000235020	AL390783.1		5.68521	1.59419	1.85374	0.0261098	1.83439	10	18206127	18261194		1					0
ENSG00000258227	CLEC5A	C-type lectin domain containing 5A	5.95825	1.69176	1.87067	0.020304	1.81636	7	141927357	141947007							1
ENSG00000159885	ZNF222	zinc finger protein 222 #or# NA /// zinc finger protein 222	5.50324	1.57204	1.79911	0.0280952	1.80764	19	44025342	44033112							1
ENSG00000153294	ADGRF2	adhesion G protein-coupled receptor F2 /// adhesion G protein-coupled receptor F4 #or# adhesion G protein-coupled receptor F2	7.69871	2.23651	1.84833	0.00672385	1.78337	6	47685864	47722021							1
ENSG00000278972	AC015920.1		6.25846	1.82109	1.73884	0.0157865	1.78101	17	69433084	69435533		1					0
ENSG00000183837	PNMA3	PNMA family member 3	4.52403	1.323	1.7512	0.0349057	1.7738	0	153056409	153060467							1
ENSG00000239039	SNORD13	small nucleolar RNA, C/D box 13	7.17998	2.10124	1.7651	0.00690003	1.77274	8	33513475	33513578					1		0
ENSG00000257696	AC010203.2		8.94182	2.63704	1.75217	0.00683649	1.76165	12	100143058	100144671		1					0
ENSG00000253919	THAP12P7	THAP domain containing 12 pseudogene 7	4.66945	1.38285	1.80405	0.0461675	1.7556	8	78760142	78762431	1						0
ENSG00000229981	LINC01435	long intergenic non-protein coding RNA 1435	6.75549	2.00367	1.68317	0.0267872	1.75341	10	107694973	108197849			1				0
ENSG00000196139	AKR1C3	aldo-keto reductase family 1 member C3	6.04621	1.83664	1.68013	0.0299816	1.71896	10	5035354	5107686							1
ENSG00000270230	MTND6P22	mitochondrially encoded NADH:ubiquinone oxidoreductase core subunit 6 pseudogene 22	40.7158	12.6996	1.68911	0.000753409	1.6808	5	100046450	100046970	1						0
ENSG00000156269	NAA11	N(alpha)-acetyltransferase 11, NatA catalytic subunit	5.68831	1.77678	1.61563	0.0491911	1.67873	4	79225694	79326050							1
ENSG00000273338	AC103591.3		21.1766	6.61923	1.67378	3.30614e-05	1.67773	1	78004346	78004554		1					0
ENSG00000254132	MTND6P3	mitochondrially encoded NADH:ubiquinone oxidoreductase core subunit 6 pseudogene 3	104.734	33.4642	1.64708	4.4944e-05	1.64604	5	94568929	94569470	1						0
ENSG00000232177	MTND4P24	mitochondrially encoded NADH:ubiquinone oxidoreductase core subunit 4 pseudogene 24	26.2253	8.44626	1.65324	7.62797e-06	1.63457	0	126472885	126473281	1						0
ENSG00000267659	LINC01482	long intergenic non-protein coding RNA 1482	8.05033	2.60527	1.72923	0.00746795	1.62761	17	68591796	68763882			1				0
ENSG00000241860	AL627309.5		6.3736	2.06353	1.59635	0.0271967	1.62699	1	141474	173862		1					0
ENSG00000259921	AC022819.1		6.95574	2.25272	1.55914	0.0202534	1.62653	15	99157231	99161140		1					0
ENSG00000224382	LINC00703	long intergenic non-protein coding RNA 703	5.30928	1.73908	1.52726	0.0418509	1.61019	10	4384246	4410612			1				0
ENSG00000147206	NXF3	nuclear RNA export factor 3	8.9721	2.93934	1.61099	0.00622105	1.60995	0	103075810	103093125							1
ENSG00000277610	RNVU1-4	RNA, variant U1 small nuclear 4	27.0194	8.93775	1.61738	4.18227e-06	1.59601	1	120942600	120942763							1
ENSG00000174951	FUT1	fucosyltransferase 1 (H blood group)	10.3943	3.44639	1.58107	0.00430735	1.59264	19	48748011	48755390							1
ENSG00000127533	F2RL3	F2R like thrombin or trypsin receptor 3	6.76177	2.29043	1.50292	0.0262229	1.56178	19	16888860	16892606							1
ENSG00000235626	KRT18P66	keratin 18 pseudogene 66	6.50098	2.22096	1.58637	0.0269808	1.54947	9	30773464	30774732	1						0
ENSG00000262902	MTCO1P40	mitochondrially encoded cytochrome c oxidase I pseudogene 40	248.755	84.9912	1.54987	5.65029e-06	1.54934	17	53105734	53106358	1						0
ENSG00000258754	LINC01579	long intergenic non-protein coding RNA 1579	11.78	4.05166	1.48323	0.00529278	1.53975	15	93718542	94070820			1				0
ENSG00000175197	AC022506.1	DNA damage inducible transcript 3 #or# NA	4.73628	1.6319	1.56537	0.0439084	1.5372	12	57516588	57521737							1
ENSG00000231943	PGM5P4-AS1	PGM5P4 antisense RNA 1	6.51011	2.28082	1.57824	0.0285432	1.51313	2	113527568	113542672							1
ENSG00000269904	MAP2K4P1	mitogen-activated protein kinase kinase 4 pseudogene 1	11.3949	4.01989	1.49593	0.0060785	1.50316	0	73524275	73563085	1						0
ENSG00000247627	MTND4P12	mitochondrially encoded NADH:ubiquinone oxidoreductase core subunit 4L pseudogene 30 #or# mitochondrially encoded NADH:ubiquinone oxidoreductase core subunit 4 pseudogene 12 /// mitochondrially encoded NADH:ubiquinone oxidoreductase core subunit 4 pseudogene 12	844.487	298.273	1.50168	9.96731e-08	1.50144	5	134926660	134928036	1						0
ENSG00000198695	MT-ND6	mitochondrially encoded NADH:ubiquinone oxidoreductase core subunit 6	12660.8	4474.35	1.50061	6.48914e-07	1.50062	0	14149	14673						1	0
ENSG00000272230	MIR3666	microRNA 3666	8.26258	2.92973	1.61669	0.00911519	1.49582	7	114653345	114653455				1			0
ENSG00000230392	AC004835.1		6.98601	2.50771	1.53419	0.0149328	1.4781	0	119291529	119335610		1					0
ENSG00000176182	MYPOP	Myb related transcription factor, partner of profilin	6.1128	2.2054	1.51732	0.0310745	1.47079	19	45890020	45902604							1
ENSG00000251142	LINC01606	long intergenic non-protein coding RNA 1606 /// NA #or# long intergenic non-protein coding RNA 1606	6.92546	2.51732	1.40589	0.0381638	1.46002	8	57240057	57240541			1				0
ENSG00000249780	AC093809.1		8.31113	3.03097	1.40145	0.0152383	1.45527	4	12640298	12640637		1					0
ENSG00000101448	EPPIN	epididymal peptidase inhibitor /// epididymal peptidase inhibitor #or# EPPIN-WFDC6 readthrough	7.8895	2.87948	1.4301	0.0287249	1.45412	20	45540626	45547752							1
ENSG00000249119	MTND6P4	mitochondrially encoded NADH:ubiquinone oxidoreductase core subunit 6 pseudogene 4	684.987	250.451	1.45175	6.1623e-07	1.45155	5	134924123	134924644	1						0
ENSG00000270906	MTND4P35	mitochondrially encoded NADH:ubiquinone oxidoreductase core subunit 4L pseudogene 5 #or# mitochondrially encoded NADH:ubiquinone oxidoreductase core subunit 4 pseudogene 35 /// mitochondrially encoded NADH:ubiquinone oxidoreductase core subunit 4 pseudogene 35	97.4991	35.72	1.44555	9.95151e-06	1.44866	5	100048988	100050362	1						0
ENSG00000185296	AC026785.1		7.91691	2.90164	1.42763	0.0178408	1.44807	5	17306381	17306960		1					0
ENSG00000267541	MTCO2P2	mitochondrially encoded cytochrome c oxidase II pseudogene 2	110.191	40.8478	1.43251	0.000272938	1.43168	18	47853233	47853457	1						0
ENSG00000091010	POU4F3	POU class 4 homeobox 3 /// POU class 4 homeobox 3 #or# NA	6.71322	2.49517	1.35062	0.0369139	1.42787	5	146338839	146341722							1
ENSG00000135898	GPR55	G protein-coupled receptor 55	7.6624	2.86393	1.38535	0.0299619	1.4198	2	230907318	230961066							1
ENSG00000197223	C1D	C1D nuclear receptor corepressor	12.6438	4.73234	1.35698	0.00462589	1.41781	2	68041130	68110948							1
ENSG00000237378	AL445989.1		8.76875	3.28896	1.37255	0.0249388	1.41474	13	63746741	63751080		1					0
ENSG00000229604	MTATP8P2	mitochondrially encoded ATP synthase 8 pseudogene 2	201.508	75.6861	1.41189	0.000118076	1.41274	2	87824942	87825143	1						0
ENSG00000210117	MT-TW	mitochondrially encoded tRNA tryptophan	590.305	221.902	1.41318	5.50706e-07	1.41154	0	5512	5579						1	0
ENSG00000129009	ISLR	immunoglobulin superfamily containing leucine rich repeat	6.45242	2.4257	1.41979	0.0380799	1.41144	15	74173671	74176872							1
ENSG00000229344	MTCO2P12	mitochondrially encoded cytochrome c oxidase II pseudogene 12	3723.57	1404.44	1.40669	3.1709e-06	1.4067	1	632757	633438	1						0
ENSG00000237480	AL355306.2		7.46191	2.81963	1.36809	0.0242037	1.40404	1	105956694	106124564		1					0
ENSG00000228253	MT-ATP8	mitochondrially encoded ATP synthase membrane subunit 8 /// mitochondrially encoded tRNA lysine #or# mitochondrially encoded ATP synthase membrane subunit 8	5520.87	2094.69	1.39815	2.9286e-06	1.39815	0	8366	8572						1	0
ENSG00000198840	MT-ND3	mitochondrially encoded NADH:ubiquinone oxidoreductase core subunit 3 #or# mitochondrially encoded tRNA arginine /// mitochondrially encoded NADH:ubiquinone oxidoreductase core subunit 3 #or# mitochondrially encoded tRNA arginine #or# mitochondrially encoded NADH:ubiquinone oxidoreductase core subunit 4L /// mitochondrially encoded NADH:ubiquinone oxidoreductase core subunit 3	11970.2	4554.33	1.39414	5.78529e-06	1.39413	0	10059	10404						1	0
ENSG00000210151	MT-TS1	mitochondrially encoded tRNA serine 1 (UCN)	972.321	370.502	1.39186	4.06937e-06	1.39195	0	7446	7514						1	0
ENSG00000198695	MT-TE	mitochondrially encoded NADH:ubiquinone oxidoreductase core subunit 6 #or# mitochondrially encoded tRNA glutamic acid /// mitochondrially encoded tRNA glutamic acid	2444.5	938.592	1.38088	4.98611e-06	1.38097	0	14149	14673						1	0
ENSG00000283213	AC130466.1		10.3183	3.97624	1.30531	0.0164523	1.37573	16	22806289	22813680		1					0
ENSG00000150637	CD226	CD226 molecule	11.6526	4.49583	1.37263	0.00937292	1.37399	18	69831158	69961803							1
ENSG00000210164	MT-TG	mitochondrially encoded cytochrome c oxidase III #or# mitochondrially encoded tRNA glycine /// mitochondrially encoded NADH:ubiquinone oxidoreductase core subunit 3 #or# mitochondrially encoded tRNA glycine /// mitochondrially encoded tRNA glycine	4849.79	1874.28	1.37156	1.96843e-05	1.37158	0	9991	10058						1	0
ENSG00000278791	MIR6723	microRNA 6723	326.879	127.017	1.36129	1.31035e-07	1.36374	1	632325	632413				1			0
ENSG00000268001	CARD8-AS1	CARD8 antisense RNA 1	6.76177	2.63704	1.34311	0.046341	1.35848	19	48255675	48258199							1
ENSG00000198712	MT-CO2	mitochondrially encoded cytochrome c oxidase II #or# mitochondrially encoded tRNA lysine /// mitochondrially encoded cytochrome c oxidase II	19907.9	7764.36	1.3584	5.36321e-06	1.3584	0	7586	8269						1	0
ENSG00000210140	MT-TC	mitochondrially encoded tRNA cysteine	339.944	133.352	1.34988	5.55757e-05	1.35006	0	5761	5826						1	0
ENSG00000201801	RNU5E-4P	RNA, U5E small nuclear 4, pseudogene	12.6621	4.97111	1.39466	0.00642321	1.34887	1	11909808	11909927	1						0
ENSG00000227674	LINC00355	long intergenic non-protein coding RNA 355	7.29536	2.86987	1.42906	0.0218286	1.34599	13	63986371	64076011			1				0
ENSG00000265179	AP000894.2		6.06425	2.38799	1.35111	0.0453344	1.34453	18	902766	906667		1					0
ENSG00000198786	MT-ND5	mitochondrially encoded NADH:ubiquinone oxidoreductase core subunit 5	60212.6	23876	1.3345	7.0644e-06	1.3345	0	12337	14148						1	0
ENSG00000145416	MARCH1	membrane associated ring-CH-type finger 1	12.7895	5.07829	1.33789	0.00794667	1.33254	4	163524298	164384050							1
ENSG00000210176	MT-TH	mitochondrially encoded tRNA histidine #or# mitochondrially encoded tRNA serine 2 (AGU/C) /// mitochondrially encoded tRNA histidine	2476.81	986.433	1.32817	3.62928e-06	1.32819	0	12138	12206						1	0
ENSG00000188641	MIR137HG	dihydropyrimidine dehydrogenase #or# MIR137 host gene /// MIR137 host gene /// MIR137 host gene #or# microRNA 137 /// MIR137 host gene #or# microRNA 2682	10.3943	4.14922	1.28904	0.0108079	1.32488	1	97077743	97995000				1			0
ENSG00000120708	TGFBI	transforming growth factor beta induced	7.05284	2.81963	1.26948	0.0404804	1.3227	5	136028895	136063818							1
ENSG00000243316	GUCY2GP	guanylate cyclase 2G, pseudogene	7.10425	2.84178	1.27687	0.0482367	1.32189	10	112308181	112356574	1						0
ENSG00000210107	MT-TQ	mitochondrially encoded tRNA glutamine	1841.24	736.806	1.32133	7.31301e-06	1.32132	0	4329	4400						1	0
ENSG00000210156	MT-TK	mitochondrially encoded tRNA lysine	901.747	362.672	1.31368	9.7425e-07	1.31406	0	8295	8364						1	0
ENSG00000237463	AL157714.2		10.7853	4.34435	1.3205	0.0111124	1.31186	1	165476841	165582155		1					0
ENSG00000247877	AC021086.1		10.3183	4.17732	1.35486	0.0112137	1.30456	5	100449754	100535262		1					0
ENSG00000198899	MT-ATP6	mitochondrially encoded ATP synthase membrane subunit 6 #or# mitochondrially encoded ATP synthase membrane subunit 8 /// mitochondrially encoded ATP synthase membrane subunit 6 /// mitochondrially encoded ATP synthase membrane subunit 6 #or# mitochondrially encoded cytochrome c oxidase III	20711	8386.98	1.30417	7.46326e-06	1.30417	0	8527	9207						1	0
ENSG00000197584	KCNMB2	potassium calcium-activated channel subfamily M regulatory beta subunit 2	7.06484	2.86393	1.26962	0.0427081	1.30266	3	178272932	178844429							1
ENSG00000184719	RNLS	renalase, FAD dependent amine oxidase	7.24681	2.93934	1.30748	0.0358215	1.30185	10	88273864	88584530							1
ENSG00000121769	FABP3	fatty acid binding protein 3	8.74785	3.56016	1.24519	0.0413407	1.29699	1	31365625	31376850							1
ENSG00000210191	MT-TL2	mitochondrially encoded tRNA histidine #or# mitochondrially encoded tRNA serine 2 (AGU/C) #or# mitochondrially encoded tRNA leucine 2 (CUN) /// mitochondrially encoded NADH:ubiquinone oxidoreductase core subunit 5 #or# mitochondrially encoded tRNA leucine 2 (CUN) /// mitochondrially encoded tRNA serine 2 (AGU/C) #or# mitochondrially encoded tRNA leucine 2 (CUN) /// mitochondrially encoded tRNA le…	4010.33	1633.49	1.29574	1.22216e-05	1.29576	0	12266	12336						1	0
ENSG00000210112	MT-TM	mitochondrially encoded tRNA methionine /// mitochondrially encoded NADH:ubiquinone oxidoreductase core subunit 2 #or# mitochondrially encoded tRNA methionine	1838.67	751.16	1.29149	1.2549e-05	1.29147	0	4402	4469						1	0
ENSG00000198886	MT-ND4	mitochondrially encoded NADH:ubiquinone oxidoreductase core subunit 4 #or# mitochondrially encoded NADH:ubiquinone oxidoreductase core subunit 4L /// mitochondrially encoded NADH:ubiquinone oxidoreductase core subunit 4 #or# mitochondrially encoded tRNA histidine /// mitochondrially encoded NADH:ubiquinone oxidoreductase core subunit 4	47747.6	19597	1.28479	1.21428e-05	1.28479	0	10760	12137						1	0
ENSG00000248527	MTATP6P1	mitochondrially encoded ATP synthase 6 pseudogene 1 /// mitochondrially encoded ATP synthase 8 pseudogene 1 #or# mitochondrially encoded ATP synthase 6 pseudogene 1	6192.36	2545.2	1.28271	5.98499e-06	1.28271	1	633696	634376	1						0
ENSG00000209082	MT-TL1	mitochondrially encoded tRNA leucine 1 (UUA/G) #or# mitochondrially encoded 16S RNA /// mitochondrially encoded tRNA leucine 1 (UUA/G)	2676.16	1100.91	1.28141	2.22822e-05	1.28146	0	3230	3304						1	0
ENSG00000225630	MTND2P28	mitochondrially encoded NADH:ubiquinone oxidoreductase core subunit 2 pseudogene 28	8978.58	3701.29	1.27846	2.45692e-05	1.27846	1	629640	630683	1						0
ENSG00000285051	AC026316.4		5.53066	2.28082	1.36821	0.048012	1.2779	3	170448639	170860993		1					0
ENSG00000210144	MT-TY	mitochondrially encoded tRNA cysteine #or# mitochondrially encoded tRNA tyrosine /// mitochondrially encoded tRNA tyrosine	3205.24	1322.95	1.27672	2.97482e-05	1.27667	0	5826	5891						1	0
ENSG00000210135	MT-TN	mitochondrially encoded tRNA asparagine #or# mitochondrially encoded tRNA cysteine /// mitochondrially encoded tRNA alanine #or# mitochondrially encoded tRNA asparagine /// mitochondrially encoded tRNA asparagine	2472.72	1022.85	1.2735	4.21102e-05	1.27351	0	5657	5729						1	0
ENSG00000163737	PF4	platelet factor 4	9.69075	4.01989	1.26082	0.0229359	1.26945	4	73981077	73982124							1
ENSG00000269028	MTRNR2L12	MT-RNR2 like 12	553.76	230.397	1.26544	3.49013e-06	1.26514	3	96617188	96618236							1
ENSG00000210100	MT-TI	mitochondrially encoded tRNA isoleucine	668.491	278.174	1.26449	8.86276e-06	1.26492	0	4263	4331						1	0
ENSG00000210049	MT-TF	mitochondrially encoded tRNA phenylalanine #or# mitochondrially encoded 12S RNA /// mitochondrially encoded tRNA phenylalanine	2521.56	1052.31	1.26077	6.52417e-06	1.26076	0	577	647						1	0
ENSG00000198938	MT-CO3	mitochondrially encoded cytochrome c oxidase III	21183	8856.48	1.2581	2.47282e-05	1.2581	0	9207	9990						1	0
ENSG00000258588	TRIM6-TRIM34	tripartite motif containing 6 #or# TRIM6-TRIM34 readthrough /// TRIM6-TRIM34 readthrough #or# tripartite motif containing 34	8.48682	3.55055	1.30363	0.0215734	1.25718	11	5596725	5644398							1
ENSG00000210154	MT-TD	mitochondrially encoded tRNA aspartic acid /// mitochondrially encoded cytochrome c oxidase II #or# mitochondrially encoded tRNA aspartic acid	3182.74	1333.58	1.25496	3.93713e-05	1.25497	0	7518	7585						1	0
ENSG00000210195	MT-TT	mitochondrially encoded tRNA threonine	1609.65	675.066	1.25363	4.29272e-05	1.25365	0	15888	15953						1	0
ENSG00000198763	MT-ND2	mitochondrially encoded NADH:ubiquinone oxidoreductase core subunit 2 #or# mitochondrially encoded tRNA tryptophan /// mitochondrially encoded NADH:ubiquinone oxidoreductase core subunit 2	26002.5	10966.6	1.24553	2.9123e-05	1.24553	0	4470	5511						1	0
ENSG00000215878	MARCKSL1P2	MARCKS like 1 pseudogene 2	11.8799	5.03464	1.16763	0.0152617	1.23857	6	138402585	138403560	1						0
ENSG00000196917	HCAR1	hydroxycarboxylic acid receptor 1	10.3183	4.37611	1.20338	0.0230112	1.23749	12	122726076	122730843							1
ENSG00000261670	AC012213.2		8.94182	3.80261	1.17924	0.034811	1.23358	8	103464389	103468985		1					0
ENSG00000255823	MTRNR2L8	MT-RNR2 like 8	448.219	190.614	1.23319	4.72731e-07	1.23355	11	10507887	10509189							1
ENSG00000238160	AC116366.2		8.25368	3.51285	1.23605	0.0475372	1.2324	5	132419416	132426714		1					0
ENSG00000110042	DTX4	deltex E3 ubiquitin ligase 4	10.5911	4.51138	1.22894	0.0218046	1.23122	11	59171430	59208587							1
ENSG00000201183	RNVU1-3	RNA, variant U1 small nuclear 3	9.48431	4.05166	1.19838	0.0376806	1.22703	1	148402715	148402875							1
ENSG00000127954	STEAP4	STEAP4 metalloreductase	9.97244	4.26234	1.23065	0.0281059	1.2263	7	88270892	88306891							1
ENSG00000150361	KLHL1	kelch like family member 1	7.41964	3.18179	1.22748	0.0474556	1.22151	13	69700594	70108493							1
ENSG00000198804	MT-CO1	mitochondrially encoded cytochrome c oxidase I	45832.4	19711.9	1.2173	2.06107e-05	1.2173	0	5904	7445						1	0
ENSG00000172349	IL16	interleukin 16	15.6762	6.75816	1.1448	0.00549633	1.21387	15	81159575	81314058							1
ENSG00000237973	MTCO1P12	mitochondrially encoded cytochrome c oxidase I pseudogene 12	11625.1	5016.72	1.21242	3.2275e-05	1.21243	1	631074	632616	1						0
ENSG00000254685	FPGT	fucose-1-phosphate guanylyltransferase	14.2054	6.14329	1.21434	0.00805349	1.20936	1	74198212	74234086							1
ENSG00000198744	MTCO3P12	mitochondrially encoded cytochrome c oxidase III pseudogene 12 /// mitochondrially encoded cytochrome c oxidase III pseudogene 12 #or# mitochondrially encoded ATP synthase 6 pseudogene 1	3228.2	1396.19	1.20925	2.59376e-05	1.20924	1	634376	634922	1						0
ENSG00000225972	MTND1P23	mitochondrially encoded NADH:ubiquinone oxidoreductase core subunit 1 pseudogene 23	3447.17	1492.61	1.2076	4.08649e-05	1.20757	1	629062	629433	1						0
ENSG00000277422	REXO1L6P	REXO1 like 6, pseudogene	13.487	5.84098	1.19978	0.00810224	1.20729	8	85826865	85828467	1						0
ENSG00000198727	MT-CYB	mitochondrially encoded cytochrome b /// mitochondrially encoded cytochrome b #or# mitochondrially encoded tRNA threonine	39582.3	17244.3	1.19873	4.65093e-05	1.19874	0	14747	15887						1	0
ENSG00000267374	AC016205.1		12.1771	5.30518	1.19993	0.0160773	1.19869	18	39206924	39800318		1					0
ENSG00000130303	BST2	bone marrow stromal cell antigen 2	12.2833	5.35976	1.11209	0.0246881	1.19646	19	17402939	17405648							1
ENSG00000234229	LINC01505	long intergenic non-protein coding RNA 1505 /// long intergenic non-protein coding RNA 1505 #or# long intergenic non-protein coding RNA 1505	7.80781	3.40868	1.17818	0.0383478	1.1957	9	106664754	106702662			1				0
ENSG00000210127	MT-TA	mitochondrially encoded tRNA alanine	1663.03	726.536	1.19459	4.16173e-05	1.19471	0	5587	5655						1	0
ENSG00000276386	CNTNAP3P2	contactin associated protein-like 3 pseudogene 2	8.87499	3.88462	1.16804	0.0348172	1.19197	9	67059560	67293468	1						0
ENSG00000071575	TRIB2	tribbles pseudokinase 2	24.4783	10.7529	1.16788	0.0009103	1.18678	2	12716889	12742734							1
ENSG00000253553	AC090568.2		11.5766	5.0945	1.14702	0.0166984	1.1842	8	88326836	88737134		1					0
ENSG00000210196	MT-TP	mitochondrially encoded tRNA proline	3343.67	1474.22	1.18146	0.000106822	1.18148	0	15956	16023						1	0
ENSG00000233766	AC098617.1		10.2789	4.5653	1.1228	0.0256391	1.17091	2	191846539	192044525		1					0
ENSG00000184619	AC135178.2	ribosomal protein L26 #or# NA /// KRAB-A domain containing 2 #or# NA	11.5466	5.13221	1.12471	0.0228233	1.16982	17	8368637	8376711							1
ENSG00000248923	MTND5P11	mitochondrially encoded NADH:ubiquinone oxidoreductase core subunit 5 pseudogene 11	292.355	130.214	1.16675	0.000351611	1.16684	5	134924648	134926459	1						0
ENSG00000189367	KIAA0408	KIAA0408 #or# NA /// KIAA0408	12.3802	5.52613	1.11747	0.0253772	1.16369	6	127440343	127459391							1
ENSG00000270069	MIR222HG	MIR222 host gene	11.9859	5.38719	1.16735	0.0168058	1.15374	0	45745211	45770274				1			0
ENSG00000210082	MT-RNR2	mitochondrially encoded 16S RNA	50340.4	22682.8	1.15012	0.000110672	1.15012	0	1671	3229						1	0
ENSG00000235172	LINC01366	long intergenic non-protein coding RNA 1366	10.9673	4.94896	1.1735	0.0237863	1.14801	5	170331429	170333879			1				0
ENSG00000164270	HTR4	5-hydroxytryptamine receptor 4	15.7005	7.08856	1.14306	0.00594217	1.14724	5	148451032	148677235							1
ENSG00000230021	AL669831.3		932.781	421.228	1.14696	7.97059e-06	1.14694	1	586071	827796		1					0
ENSG00000166349	RAG1	recombination activating 1	8.08975	3.65773	1.12494	0.0433346	1.14515	11	36510709	36593156							1
ENSG00000180964	TCEAL8	transcription elongation factor A like 8	7.93519	3.58826	1.17283	0.0420319	1.14498	0	103252995	103255203							1
ENSG00000198888	MT-ND1	mitochondrially encoded NADH:ubiquinone oxidoreductase core subunit 1 #or# mitochondrially encoded tRNA isoleucine /// mitochondrially encoded NADH:ubiquinone oxidoreductase core subunit 1 #or# mitochondrially encoded tRNA leucine 1 (UUA/G) /// mitochondrially encoded NADH:ubiquinone oxidoreductase core subunit 1	28503.7	13002	1.13241	7.0692e-05	1.13241	0	3307	4262						1	0
ENSG00000270022	Z93241.1	NA /// NA #or# RNA, U12 small nuclear	93.775	43.0007	1.11446	1.33826e-09	1.12484	22	42615244	42615907							1
ENSG00000134716	CYP2J2	cytochrome P450 family 2 subfamily J member 2	17.4409	8.00208	1.11994	0.00367813	1.12403	1	59893308	59926790							1
ENSG00000004468	CD38	CD38 molecule	13.0108	5.99246	1.10408	0.0160749	1.11849	4	15778275	15853230							1
ENSG00000211459	MT-RNR1	mitochondrially encoded 12S RNA	24706.5	11413	1.11421	0.000140942	1.11421	0	648	1601						1	0
ENSG00000212907	MT-ND4L	mitochondrially encoded NADH:ubiquinone oxidoreductase core subunit 4L /// mitochondrially encoded tRNA arginine #or# mitochondrially encoded NADH:ubiquinone oxidoreductase core subunit 4L	11082.1	5149.97	1.1056	0.000142471	1.10559	0	10470	10766						1	0
ENSG00000132357	CARD6	caspase recruitment domain family member 6	11.5192	5.37164	1.10642	0.0219709	1.1006	5	40841184	40860175							1
ENSG00000240409	MTATP8P1	mitochondrially encoded ATP synthase 8 pseudogene 1	168.876	78.8552	1.09914	0.00297316	1.09869	1	633535	633741	1						0
ENSG00000285280	AL390957.1		14.921	6.97545	1.07478	0.0108665	1.09698	1	192167786	192957713		1					0
ENSG00000210077	MT-TV	mitochondrially encoded tRNA valine #or# mitochondrially encoded 16S RNA /// mitochondrially encoded tRNA valine /// mitochondrially encoded tRNA valine #or# mitochondrially encoded 12S RNA	4146.86	1943.4	1.09344	0.000118589	1.09344	0	1602	1670						1	0
ENSG00000163219	ARHGAP25	Rho GTPase activating protein 25	7.73185	3.62597	1.15296	0.0465257	1.09245	2	68679601	68826833							1
ENSG00000265185	SNORD3B-1	small nucleolar RNA, C/D box 3B-1	208.501	98.3005	1.08525	3.96911e-13	1.08479	17	19061912	19062669					1		0
ENSG00000100603	SNW1	SNW domain containing 1	13.5022	6.37018	1.09069	0.0150622	1.08379	14	77717599	77761207							1
ENSG00000095485	CWF19L1	CWF19 like 1, cell cycle control (S. pombe)	15.3457	7.26814	1.09102	0.0102703	1.07818	10	100232298	100267680							1
ENSG00000202257	RNA5S16	RNA, 5S ribosomal 16	15.7916	7.50464	1.03519	0.0102756	1.0733	1	228643809	228643927							1
ENSG00000162367	TAL1	TAL bHLH transcription factor 1, erythroid differentiation factor	10.1061	4.82623	1.12311	0.044499	1.06626	1	47216290	47232220							1
ENSG00000124092	CTCFL	CCCTC-binding factor like	13.5444	6.55277	1.03795	0.01638	1.04752	20	57495966	57525652							1
ENSG00000228835	AC012123.1		18.9299	9.20235	1.04854	0.0073309	1.04059	18	32769795	32774413		1					0
ENSG00000118922	KLF12	Kruppel like factor 12	19.1296	9.30292	1.03199	0.00879756	1.04005	13	73686089	73995056							1
ENSG00000262202	AC007952.4	NA #or# small nucleolar RNA, C/D box 3D /// NA /// NA #or# small nucleolar RNA, C/D box 3D #or# small nucleolar RNA, C/D box 3D	164.654	80.3651	1.02709	1.54311e-11	1.0348	17	19112000	19112636							1
ENSG00000140563	MCTP2	multiple C2 and transmembrane domain containing 2	11.7617	5.74342	1.01156	0.0307952	1.03412	15	94231538	94483952							1
ENSG00000133124	IRS4	insulin receptor substrate 4 #or# NA /// insulin receptor substrate 4	46.9014	22.9125	1.02904	4.75752e-05	1.0335	0	108732482	108736409							1
ENSG00000072952	MRVI1	murine retrovirus integration site 1 homolog	13.8418	6.76411	1.01564	0.0195948	1.03306	11	10573091	10693988							1
ENSG00000185291	IL3RA	interleukin 3 receptor subunit alpha	12.5106	6.13367	1.0624	0.0222557	1.02833	0	1336616	1382689							1
ENSG00000229153	EPHA1-AS1	EPHA1 antisense RNA 1	9.72993	4.77598	1.02619	0.0469724	1.02663	7	143407813	143523449							1
ENSG00000283676	MIR5087	microRNA 5087	17.177	8.47142	1.01958	0.00863391	1.0198	1	148334479	148334554				1			0
ENSG00000115648	MLPH	melanophilin	11.0947	5.50031	1.02953	0.0394706	1.01228	2	237485428	237555318							1
ENSG00000107949	BCCIP	BRCA2 and CDKN1A interacting protein	12.1105	6.02056	1.03143	0.0286485	1.00828	10	125823546	125853695							1
ENSG00000279359	AL359195.2		12.6412	6.30071	1.0294	0.0241849	1.00455	10	80249710	80254121		1					0
ENSG00000113649	TCERG1	transcription elongation regulator 1 #or# NA /// transcription elongation regulator 1	25.7577	12.9133	1.0043	0.0019432	0.996144	5	146447311	146511961							1
ENSG00000137090	DMRT1	doublesex and mab-3 related transcription factor 1	11.2461	5.71165	1.01122	0.0431018	0.977451	9	841690	969090							1
ENSG00000225755	AL451063.1		2.54081	0	4.0944	0.0257959	?	1	163237214	163239197		1					0
ENSG00000282265	AL450990.1		2.19833	0	3.89271	0.0418885	?	1	215393646	215394418		1					0
ENSG00000279544	AL133243.4		2.86843	0	4.25226	0.00238631	?	2	32563328	32566436		1					0
ENSG00000241018	RCC2P5	regulator of chromosome condensation 2 pseudogene 5	2.23774	0	3.91277	0.0104133	?	3	96753185	96754671	1						0
ENSG00000250656	ST3GAL1P1	ST3 beta-galactoside alpha-2,3-sialyltransferase 1 pseudogene 1	2.04377	0	3.76866	0.0471303	?	4	67716375	67717388	1						0
ENSG00000169245	CXCL10	C-X-C motif chemokine ligand 10	2.26801	0	3.9257	0.0135714	?	4	76021117	76023497							1
ENSG00000248863	AC097376.1		2.00722	0	3.7405	0.0150086	?	4	139426299	139430884		1					0
ENSG00000233859	ADH5P4	alcohol dehydrogenase 5 (class III), chi polypeptide, pseudogene 4	2.21946	0	3.90487	0.0235995	?	6	65836930	65838039	1						0
ENSG00000234639	AC009263.1		2.91698	0	4.27515	0.0052084	?	7	138022458	138024339		1					0
ENSG00000225358	MIPEPP1	mitochondrial intermediate peptidase pseudogene 1	2.45912	0	4.0575	0.0187356	?	7	112735166	112738693	1						0
ENSG00000235165	CDK5P1	cyclin dependent kinase 5 pseudogene 1	2.71078	0	4.20421	0.00720832	?	8	122769274	122770150	1						0
ENSG00000188029	CTSL3P	cathepsin L family member 3, pseudogene	2.03463	0	3.76144	0.0363843	?	9	87772453	87786884	1						0
ENSG00000214215	C12orf74	chromosome 12 open reading frame 74	2.39229	0	4.03363	0.0121594	?	12	92702843	92708549							1
ENSG00000205693	MANSC4	MANSC domain containing 4	2.23774	0	3.9132	0.033386	?	12	27762738	27771276							1
ENSG00000258768	AL356019.2		2.39229	0	4.03554	0.0103686	?	14	20260480	20264308		1					0
ENSG00000261770	AC006504.1		2.57736	0	4.10278	0.00608985	?	19	27757184	27760849		1					0
ENSG00000275329	AL138781.2		5.93083	11.849	-1.01886	0.029464	-0.998458	9	136122521	136124363		1					0
ENSG00000164855	TMEM184A	transmembrane protein 184A	20.2182	40.5942	-1.00454	0.000151354	-1.00561	7	1542235	1560821							1
ENSG00000177875	CCDC184	coiled-coil domain containing 184	8.38082	16.9273	-1.0206	0.00783989	-1.01419	12	48183584	48185926							1
ENSG00000281383	FP671120.4		190.364	385.833	-1.01758	1.91644e-09	-1.01922	21	8254592	8255514		1					0
ENSG00000092054	MYH7	myosin heavy chain 7	11.0733	22.5263	-1.02475		-1.02452	14	23412738	23435718							1
ENSG00000284677	AL031985.4		6.88891	14.0951	-1.03537	0.0192239	-1.03285	1	40436199	40450039		1					0
ENSG00000148110	MFSD14B	major facilitator superfamily domain containing 14B	8.02006	16.5932	-1.036	0.0132156	-1.04891	9	94374551	94461042							1
ENSG00000110906	KCTD10	potassium channel tetramerization domain containing 10	9.78476	20.3299	-1.04023	0.0041202	-1.055	12	109448656	109477544							1
ENSG00000226963	AC078883.2		5.23959	10.8882	-1.04369	0.0382125	-1.05523	2	172427774	172428603		1					0
ENSG00000214248	AC010336.1		13.8355	28.7822	-1.04676	0.000631281	-1.0568	19	7898804	7903542		1					0
ENSG00000223573	TINCR	TINCR ubiquitin domain containing	5.33041	11.2067	-1.09344	0.0229834	-1.07204	19	5558167	5578349							1
ENSG00000161682	FAM171A2	family with sequence similarity 171 member A2	6.26736	13.3012	-1.03319	0.0318603	-1.08563	17	44353215	44363875							1
ENSG00000246777	AC044802.1		4.5029	9.57412	-1.09793	0.0390255	-1.08829	16	66751752	66754740		1					0
ENSG00000064201	TSPAN32	tetraspanin 32	4.84538	10.305	-1.09414	0.0291215	-1.08867	11	2301997	2318200							1
ENSG00000148158	SNX30	sorting nexin family member 30	5.79432	12.5512	-1.09988	0.0159586	-1.11511	9	112750838	112881671							1
ENSG00000141013	GAS8	growth arrest specific 8	12.9623	28.1799	-1.08676	0.000621845	-1.12034	16	90019629	90044975							1
ENSG00000161921	CXCL16	C-X-C motif chemokine ligand 16	5.96715	12.9857	-1.06821	0.0282616	-1.12181	17	4733526	4739922							1
ENSG00000165661	QSOX2	quiescin sulfhydryl oxidase 2	5.96715	13.0486	-1.08412	0.0200975	-1.12878	9	136206333	136245841							1
ENSG00000185669	SNAI3	snail family transcriptional repressor 3	5.66718	12.4033	-1.11784	0.023966	-1.13002	16	88677682	88686493							1
ENSG00000197140	ADAM32	ADAM metallopeptidase domain 32	4.72714	10.3524	-1.12893	0.0301709	-1.13092	8	39106990	39284911							1
ENSG00000175229	GAL3ST3	galactose-3-O-sulfotransferase 3	7.11029	15.5762	-1.1292	0.00859877	-1.13136	11	66041952	66049180							1
ENSG00000161132	AC007663.1		5.60949	12.3279	-1.12072	0.035932	-1.13598	22	20299760	20313216		1					0
ENSG00000151729	SLC25A4	solute carrier family 25 member 4	13.5935	30.0027	-1.15392	0.0480107	-1.14218	4	185143241	185150382							1
ENSG00000282872	C1orf232	chromosome 1 open reading frame 230	3.8842	8.63544	-1.13436	0.0482946	-1.15265	1	26164161	26168581							1
ENSG00000173110	HSPA6	heat shock protein family A (Hsp70) member 6	5.31214	11.8801	-1.16716	0.0432385	-1.16118	1	161524540	161526910							1
ENSG00000196388	INCA1	inhibitor of CDK, cyclin A1 interacting protein 1	6.74349	15.0966	-1.15921	0.00628949	-1.16265	17	4988130	4997610							1
ENSG00000232233	LINC02043	long intergenic non-protein coding RNA 2043	3.87506	8.72942	-1.17029	0.0418155	-1.17167	3	186810880	186825521			1				0
ENSG00000261308	FIGNL2	fidgetin like 2	7.27708	16.4573	-1.17206	0.00986094	-1.17729	12	51817840	51848766							1
ENSG00000227733	AC239809.3		7.49847	17.132	-1.19475	0.00352854	-1.19203	1	148159213	148255012		1					0
ENSG00000242338	BMS1P4	BMS1, ribosome biogenesis factor pseudogene 4 /// BMS1, ribosome biogenesis factor pseudogene 4 #or# NA	3.90534	8.95029	-1.15754	0.0474465	-1.19649	10	73715843	73730469	1						0
ENSG00000107341	UBE2R2	ubiquitin conjugating enzyme E2 R2	10.8399	24.9071	-1.17427	0.000741239	-1.2002	9	33817567	33920404							1
ENSG00000225981	AC102953.1		4.13586	9.53642	-1.19636	0.0340055	-1.20526	7	1459937	1464008		1					0
ENSG00000228839	PIK3IP1-AS1	PIK3IP1 antisense RNA 1 (head to head)	4.2541	9.81062	-1.24162	0.0304593	-1.20549	22	31292499	31338021							1
ENSG00000198106	AC025279.1		4.23582	9.92007	-1.21734	0.0374575	-1.22771	16	29291220	29372110		1					0
ENSG00000100220	RTCB	RNA 2',3'-cyclic phosphate and 5'-OH ligase	3.56571	8.3583	-1.22553	0.0268725	-1.22902	22	32387582	32412255							1
ENSG00000175445	LPL	lipoprotein lipase	3.69023	8.70491	-1.25968	0.038507	-1.23812	8	19901717	19967258							1
ENSG00000142541	RPL13A	ribosomal protein L13a #or# NA /// ribosomal protein L13a #or# small nucleolar RNA, C/D box 35A /// ribosomal protein L13a #or# small nucleolar RNA, C/D box 33 /// ribosomal protein L13a #or# small nucleolar RNA, C/D box 34 /// ribosomal protein L13a	51.517	123.516	-1.2667	7.14501e-13	-1.26158	19	49487554	49492308							1
ENSG00000134864	GGACT	gamma-glutamylamine cyclotransferase /// gamma-glutamylamine cyclotransferase #or# NA	3.93275	9.45733	-1.23913	0.0302429	-1.26589	13	100530164	100589528							1
ENSG00000261409	AL035425.3		14.4059	35.0998	-1.29977	5.49127e-05	-1.2848	0	108719949	108724944		1					0
ENSG00000275441	AC020765.2		2.81988	6.94368	-1.30691	0.0458527	-1.30007	16	28553709	28554140		1					0
ENSG00000081277	PKP1	plakophilin 1	4.06903	10.2009	-1.28591	0.0125846	-1.32594	1	201283452	201332993							1
ENSG00000262413	AC145207.2		8.83558	22.16	-1.30571	0.000912508	-1.32656	17	81867721	81868552		1					0
ENSG00000132429	POPDC3	popeye domain containing 3	2.66223	6.7198	-1.31003	0.0454949	-1.33578	6	105158280	105179995							1
ENSG00000140107	SLC25A47	solute carrier family 25 member 47	2.72278	6.91559	-1.34734	0.0384115	-1.34477	14	100323337	100330378							1
ENSG00000225285	LINC01770	long intergenic non-protein coding RNA 1770	4.26014	10.8283	-1.30339	0.017376	-1.34584	1	1430539	1434573			1				0
ENSG00000275692	MIR6724-4	microRNA 6724-4	8.18685	21.2398	-1.35567	0.00132355	-1.37539	21	8432530	8432621				1			0
ENSG00000184602	SNN	stannin	2.87757	7.56084	-1.38793	0.0376604	-1.39369	16	11668414	11679159							1
ENSG00000124334	IL9R	interleukin 9 receptor #or# NA /// interleukin 9 receptor	2.27715	6.11519	-1.48027	0.0388434	-1.42517	0	155997581	156010817							1
ENSG00000205090	TMEM240	transmembrane protein 240	3.58399	9.63625	-1.36376	0.0326721	-1.42691	1	1535174	1540453							1
ENSG00000081923	ATP8B1	ATPase phospholipid transporting 8B1	2.73192	7.48542	-1.40189	0.0376909	-1.45417	18	57646426	57803101							1
ENSG00000235421	AC114501.2		3.68395	10.3081	-1.50495	0.0101574	-1.48445	7	65525629	65554744		1					0
ENSG00000276023	DUSP14	dual specificity phosphatase 14	4.38751	12.6517	-1.47099	0.00520215	-1.52785	17	37489831	37513501							1
ENSG00000267024	AC008747.1		2.74105	7.92667	-1.51718	0.0205001	-1.53198	19	34426112	34428273		1					0
ENSG00000275110	MIR6087	microRNA 6087	5.26986	15.4594	-1.54442	0.00160963	-1.55265	0	109054542	109054590				1			0
ENSG00000273189	AC010619.2		133.799	399.122	-1.57464	2.63088e-27	-1.57676	19	49474586	49487637		1					0
ENSG00000246982	Z84485.1		1.69501	5.06274	-1.59133	0.0456716	-1.57862	6	36146698	36197205		1					0
ENSG00000281058	DUX4L6	double homeobox 4 like 6	1.72529	5.15436	-1.64051	0.0344752	-1.57896	4	190074525	190075799							1
ENSG00000214720	KRT18P49	keratin 18 pseudogene 49	2.05577	6.24085	-1.63893	0.0451592	-1.60206	0	107428630	107429461	1						0
ENSG00000260072	AC008938.1		1.73443	5.29924	-1.69558	0.0304423	-1.61133	16	24472798	24495177		1					0
ENSG00000243566	UPK3B	uroplakin 3B	2.43171	7.43518	-1.57733	0.0193102	-1.6124	7	76510428	76516521							1
ENSG00000271409	AC073176.2		1.84043	5.74936	-1.55623	0.0422277	-1.64336	10	70929925	70932057		1					0
ENSG00000230806	SRGAP2-AS1	SRGAP2 antisense RNA 1	2.74105	8.59114	-1.62198	0.0109488	-1.64812	1	121360156	121398806							1
ENSG00000276747	PADI6	peptidyl arginine deiminase 6	1.8587	5.83137	-1.5661	0.0460519	-1.64954	1	17372196	17401699							1
ENSG00000127588	GNG13	G protein subunit gamma 13	1.89812	6.09304	-1.68365	0.0384817	-1.68259	16	798041	800733							1
ENSG00000179284	DAND5	DAN domain BMP antagonist family member 5	2.81988	9.13288	-1.67642	0.00703371	-1.69544	19	12965159	12974762							1
ENSG00000134443	GRP	gastrin releasing peptide	1.48277	4.82029	-1.762	0.0421556	-1.70083	18	59220168	59230774							1
ENSG00000181016	LSMEM1	leucine rich single-pass membrane protein 1 /// interferon related developmental regulator 1 #or# leucine rich single-pass membrane protein 1	1.63732	5.36504	-1.67934	0.0302935	-1.71225	7	112480853	112491062							1
ENSG00000237172	B3GNT9	UDP-GlcNAc:betaGal beta-1,3-N-acetylglucosaminyltransferase 9	2.14977	7.04719	-1.63637	0.0274384	-1.71286	16	67148105	67151214							1
ENSG00000233554	B4GALT1-AS1	B4GALT1 antisense RNA 1	1.92839	6.33247	-1.70645	0.0203186	-1.71537	9	33166975	33179983							1
ENSG00000269968	AC006064.4		1.62818	5.45666	-1.7305	0.0411033	-1.74476	12	6537794	6538370		1					0
ENSG00000226945	AC098935.1		1.73443	5.84692	-1.76135	0.036366	-1.75322	1	206907619	206908229		1					0
ENSG00000152670	DDX4	DEAD-box helicase 4	1.35539	4.57124	-1.7125	0.0495725	-1.75388	5	55738017	55817157							1
ENSG00000275708	MIR3648-1	microRNA 3648-1	4.67859	17.0026	-1.81707	0.000272402	-1.86161	21	8208473	8208652				1			0
ENSG00000116035	ATP6V1B1	ATPase H+ transporting V1 subunit B1 /// ventral anterior homeobox 2 #or# ATPase H+ transporting V1 subunit B1	1.33711	5.04058	-1.8701	0.0346283	-1.91447	2	70900590	70965373							1
ENSG00000264278	ZNF236-DT	ZNF236 divergent transcript	2.05577	7.77218	-1.94353	0.0100457	-1.91864	18	76794732	76822295							1
ENSG00000114124	GRK7	G protein-coupled receptor kinase 7	1.13401	4.3007	-1.97781	0.0358177	-1.92314	3	141778148	141818490							1
ENSG00000010438	PRSS3	serine protease 3	1.05518	4.08936	-1.92035	0.046999	-1.95439	9	33750466	33799231							1
ENSG00000233577	AL022332.1		1.67673	6.5276	-1.94797	0.0174677	-1.9609	22	25279529	25282674		1					0
ENSG00000229999	AL022238.2		1.18256	4.6311	-2.01715	0.0329266	-1.96944	22	40372664	40388290		1					0
ENSG00000026297	AL159163.1	ribonuclease T2 #or# NA	0.852075	3.89056	-2.17826	0.0359574	-2.19093	6	166929504	166957191							1
ENSG00000215333	KRT18P23	keratin 18 pseudogene 23	0.88235	4.20541	-2.2357	0.040818	-2.25282	22	44566965	44568247	1						0
ENSG00000142541	SNORD32A	ribosomal protein L13a #or# small nucleolar RNA, C/D box 32A	1.18256	5.78112	-2.36495	0.00969811	-2.28944	19	49487554	49492308					1		0
ENSG00000279253	AL121753.2		0.591279	3.06867	-2.47589	0.0466994	-2.3757	20	35262727	35264187		1					0
ENSG00000226631	SLC9A3P3	solute carrier family 9 member 3 pseudogene 3	0.794385	4.53354	-2.44542	0.0179372	-2.51273	10	50025135	50027363	1						0
ENSG00000277496	AL357033.4		0.852075	5.19867	-2.64022	0.0128122	-2.60909	20	62648961	62650767		1					0
ENSG00000240563	L1TD1	LINE1 type transposase domain containing 1 /// NA #or# LINE1 type transposase domain containing 1	0.542728	3.43084	-2.6307	0.028706	-2.66026	1	62194831	62212328							1
ENSG00000274184	AC011815.2		0.542728	3.46854	-2.64035	0.0352171	-2.67603	18	35268218	35270238		1					0
ENSG00000182898	TCHHL1	trichohyalin like 1	0.503315	3.22015	-2.59789	0.0430621	-2.6776	1	152084144	152089064							1
ENSG00000278961	SMIM34B	small integral membrane protein 34B	0.551866	3.59787	-2.71372	0.0325919	-2.70475	21	7784482	7793954							1
ENSG00000270710	FO393422.1		0.551866	3.62597	-2.67883	0.043865	-2.71597	1	235565761	235566937		1					0
ENSG00000265218	AC103810.2		0.503315	3.56611	-2.66964	0.028645	-2.82482	17	64892729	64910180		1					0
ENSG00000280305	AC018765.1		0.300209	2.1611	-2.83155	0.0424037	-2.84773	5	29979669	29983114		1					0
ENSG00000103200	AC069335.1		0.300209	2.57718	-3.11373	0.0452438	-3.10175	7	140435316	140435787		1					0
ENSG00000264063	MIR3687-2	microRNA 3687-2	1.88898	16.3048	-3.08301	0.00062204	-3.10962	21	8987370	8987430				1			0
ENSG00000285416	AC137630.5		0.251657	2.50771	-3.02559	0.0381146	-3.31684	3	48997221	48999442		1					0
ENSG00000258230	AC063950.1		0.29107	2.9992	-3.30329	0.0284869	-3.36514	12	101773114	101773755		1					0
ENSG00000249456	AL731577.2		0.251657	2.7346	-3.1673	0.0376209	-3.4418	10	124917143	124942881		1					0
ENSG00000248773	AC108727.1		0.251657	2.9992	-3.30147	0.0239321	-3.57505	3	140972744	140973255		1					0
ENSG00000261963	CCDC92B	coiled-coil domain containing 92B	0.29107	3.83731	-3.64926	0.00744532	-3.72065	17	2724411	2749504							1
ENSG00000229031	MTCO1P25	mitochondrially encoded cytochrome c oxidase I pseudogene 25	2.76219	46.6137	-4.07489		-4.07687	7	69331835	69333633	1						0
ENSG00000233026	MTCO1P5	mitochondrially encoded cytochrome c oxidase I pseudogene 5	0.551866	11.0755	-4.32425		-4.3269	3	12165299	12165642	1						0
ENSG00000234576	MTND1P26	mitochondrially encoded NADH:ubiquinone oxidoreductase core subunit 1 pseudogene 26	0.803524	32.5457	-5.32923		-5.33998	2	131385700	131386237	1						0
ENSG00000237919	AL158840.1		0	2.1988	-3.82132	0.0350742	?	1	70013982	70031222		1					0
ENSG00000271732	AL137798.1		0	2.01028	-3.72057	0.0379514	?	1	16617391	16617729		1					0
ENSG00000282890	AC009975.1		0	2.32813	-3.93621	0.00662203	?	2	48809340	49419013		1					0
ENSG00000248530	BCL2L12P1	BCL2 like 12 pseudogene 1	0	2.25866	-3.83344	0.0113838	?	3	131526447	131527179	1						0
ENSG00000204628	SNORD96A	receptor for activated C kinase 1 #or# small nucleolar RNA, C/D box 96A	0	2.02583	-3.74104	0.0186741	?	5	181236909	181248096					1		0
ENSG00000237425	RPSAP2	ribosomal protein SA pseudogene 2	0	2.25866	-3.84364	0.0202329	?	6	28732017	28732904	1						0
ENSG00000213787	RPL7AP38	ribosomal protein L7a pseudogene 38	0	2.31258	-3.91407	0.03027	?	7	26922110	26922912	1						0
ENSG00000214807	NPM1P31	nucleophosmin 1 pseudogene 31	0	2.19286	-3.865	0.0237524	?	10	124867510	124868326	1						0
ENSG00000258344	AC078778.2		0	2.27487	-3.90516	0.0129446	?	12	54276631	54345083		1					0
ENSG00000257966	OLA1P3	Obg-like ATPase 1 pseudogene 3	0	3.35542	-4.45983	0.00135142	?	12	55870048	55872602	1						0
ENSG00000267130	AC008738.2	NA /// NA #or# CEBPA divergent transcript	0	2.32813	-3.92505	0.0254618	?	19	33305036	33309387							1
