# Supplementary material for: The role of reciprocal fusions in MLL-r acute leukemia: studying the chromosomal translocation t(6;11)
Source: Oncogene. 2021 Aug 5;40(40):5902–12. doi: 10.1038/s41388-021-01983-3 (PMC8497272; doi:10.1038/s41388-021-01983-3)
Supplement: Supplementary file 12 — ATAC-Seq AF6-shMLL [file 41388_2021_1983_MOESM12_ESM.xlsx]

## Sheet: Sheet1
ID	gene symbol	gene	mean exp	mean mock	log2	pvalue	log2 rolf	chrom	anfang	ende	PG	NA	LINC	MIR	SNO	MT	PCG
ENSG00000118058	KMT2A	lysine methyltransferase 2A	1444.09	32.2381	5.50172	1.50527e-176	5.48524	11	118436490	118526832							1
ENSG00000182050	AC010196.1	NA /// MGAT4 family member C #or# NA	4.60726	0.226893	3.97088	0.00532293	4.34382	12	85955666	86838904							1
ENSG00000259977	AL121578.3		4.55309	0.264599	4.02268	0.00302934	4.10497	0	37906147	37949405		1					0
ENSG00000152266	PTH	parathyroid hormone	3.94482	0.264599	3.72946	0.00868515	3.89808	11	13492055	13496181							1
ENSG00000256422	LINC02552	long intergenic non-protein coding RNA 2552	3.2863	0.226893	3.4723	0.0445062	3.85638	11	104445868	104609321			1				0
ENSG00000264349	MIR4258	microRNA 4258	3.28162	0.226893	3.51937	0.018103	3.85432	1	154975693	154975783				1			0
ENSG00000232818	RPS2P32	ribosomal protein S2 pseudogene 32	3.19908	0.226893	3.39043	0.0119159	3.81757	7	23490473	23491364	1						0
ENSG00000185821	OR6C76	olfactory receptor family 6 subfamily C member 76	3.68315	0.264599	3.67255	0.0210249	3.79906	12	55426254	55427192							1
ENSG00000279532	AC002094.5		7.53683	0.551351	3.81048	0.00159467	3.77291	17	28373673	28374301		1					0
ENSG00000232551	MTCO1P14	mitochondrially encoded cytochrome c oxidase I pseudogene 14	2.8926	0.226893	3.24142	0.0260188	3.67228	1	106804474	106806032	1						0
ENSG00000248231	KRT8P4	keratin 8 pseudogene 4	3.33111	0.264599	3.52703	0.0173049	3.65412	8	89412621	89415071	1						0
ENSG00000266340	AC138207.7		2.85095	0.226893	3.25215	0.0428806	3.65136	17	30978610	30980250		1					0
ENSG00000253967	AC022730.4		2.75904	0.226893	3.30375	0.0285513	3.60408	8	70471134	70485687		1					0
ENSG00000259335	HNRNPMP1	heterogeneous nuclear ribonucleoprotein M pseudogene 1	2.71424	0.226893	3.20688	0.0379237	3.58046	15	44447577	44449344	1						0
ENSG00000253111	AC091114.1		2.67259	0.226893	3.18817	0.0314277	3.55815	8	125466939	125541373		1					0
ENSG00000277049	RNA5SP530	RNA, 5S ribosomal pseudogene 530	3.11185	0.264599	3.40425	0.0317672	3.55589	9	41237440	41237557	1						0
ENSG00000237307	SRRM1P3	serine/arginine repetitive matrix 1 pseudogene 3	2.8926	0.264599	3.2708	0.0438258	3.45049	0	136976417	136985705	1						0
ENSG00000251588	AC125336.1		2.89184	0.264599	3.33826	0.0285858	3.45011	4	36506043	36508869		1					0
ENSG00000203663	OR2L2	olfactory receptor family 2 subfamily L member 2	2.45257	0.264599	3.13095	0.0338124	3.21241	1	248030070	248042305							1
ENSG00000254229	FAM90A12P	family with sequence similarity 90 member A12, pseudogene	2.45257	0.264599	3.14168	0.0251229	3.21241	8	8027077	8032305	1						0
ENSG00000213938	SEPHS1P6	selenophosphate synthetase 1 pseudogene 6	4.86893	0.529198	3.1391	0.0156373	3.20173	2	199659551	199660729	1						0
ENSG00000229204	PTGES3P3	prostaglandin E synthase 3 pseudogene 3	4.42498	0.491492	3.08143	0.0230147	3.17043	4	169791221	169791702	1						0
ENSG00000240457	RN7SL472P	RNA, 7SL, cytoplasmic 472, pseudogene	2.80069	0.324458	3.31987	0.0253719	3.10968	14	102077180	102077472	1						0
ENSG00000260467	AC018552.2		4.42498	0.529198	3.0555	0.023656	3.06379	16	57681124	57701730		1					0
ENSG00000214866	DCDC2C	doublecortin domain containing 2C	2.19166	0.264599	2.9344	0.0490262	3.05015	2	3703592	3847411							1
ENSG00000163530	DPPA2	developmental pluripotency associated 2	2.14609	0.264599	2.93234	0.036684	3.01983	3	109293788	109316517							1
ENSG00000205861	PCOTH	Pro-X-Gly collagen triple helix like repeat containing	5.39543	0.68068	2.74874	0.017215	2.98669	13	23888889	23897263							1
ENSG00000133636	NTS	neurotensin	4.07685	0.551351	2.92995	0.0239665	2.88641	12	85874295	85882992							1
ENSG00000226349	AC099066.1		3.5967	0.491492	2.71848	0.0369747	2.87143	1	225710968	225736274		1					0
ENSG00000095110	NXPE1	neurexophilin and PC-esterase domain family member 1	3.59201	0.491492	2.79456	0.0245646	2.86955	11	114521645	114559895							1
ENSG00000261332	AC116348.2		3.8576	0.529198	2.83504	0.0471297	2.86582	16	30498766	30499554		1					0
ENSG00000241135	LINC00881	long intergenic non-protein coding RNA 881	2.32446	0.324458	2.96783	0.0426801	2.84079	3	157089881	157101135			1				0
ENSG00000168746	LINC01620	long intergenic non-protein coding RNA 1620	3.37276	0.491492	2.67429	0.0403697	2.77869	20	44436172	44465349			1				0
ENSG00000236013	AL138737.1		4.03205	0.589057	2.84085	0.0278113	2.77503	6	140067435	140093721		1					0
ENSG00000187258	NPSR1	neuropeptide S receptor 1	3.32642	0.491492	2.73827	0.0405115	2.75873	7	34658239	34878332							1
ENSG00000170458	CD14	CD14 molecule	3.67923	0.551351	2.78955	0.0317466	2.73836	5	140631728	140633701							1
ENSG00000282608	ADORA3	adenosine A3 receptor	4.99704	0.756091	2.62682	0.0123828	2.72444	1	111499429	111503760							1
ENSG00000254298	AC008641.1		7.81026	1.20988	2.55237	0.00467498	2.69051	5	151158106	151158462		1					0
ENSG00000266729	DSG1-AS1	DSG1 antisense RNA 1	2.05887	0.324458	2.90224	0.0489578	2.66575	18	31343368	31426988							1
ENSG00000205858	LRRC72	leucine rich repeat containing 72	4.42966	0.718386	2.47426	0.0458174	2.62437	7	16526880	16581568							1
ENSG00000280025	AL008638.6		4.86425	0.793797	2.59775	0.0131315	2.61537	22	27102766	27107019		1					0
ENSG00000225549	SELENOKP3	selenoprotein K pseudogene 3	3.37668	0.551351	2.64867	0.0442068	2.61456	6	118757518	118783420	1						0
ENSG00000156219	ART3	ADP-ribosyltransferase 3	4.55777	0.756091	2.50259	0.0174479	2.5917	4	76011184	76112802							1
ENSG00000227152	OR2T7	olfactory receptor family 2 subfamily T member 7	3.99039	0.718386	2.30215	0.0452062	2.4737	1	248436359	248444316							1
ENSG00000274553	AC138035.3		4.38409	0.793797	2.38729	0.0202897	2.46544	5	181329049	181331839		1					0
ENSG00000249484	LINC01470	long intergenic non-protein coding RNA 1470	3.72012	0.68068	2.33624	0.0389263	2.4503	5	152618965	153223543			1				0
ENSG00000154165	GPR15	G protein-coupled receptor 15	3.90317	0.718386	2.28768	0.0496576	2.44182	3	98531899	98533150							1
ENSG00000232892	AL499616.1		3.89849	0.718386	2.35147	0.0407701	2.44008	1	163161675	163213023		1					0
ENSG00000169550	MUC15	mucin 15, cell surface associated	3.85683	0.718386	2.34184	0.0417013	2.42459	11	26559033	26572233							1
ENSG00000211697	TRGV5	T cell receptor gamma variable 5	4.37941	0.81595	2.46438	0.0222628	2.42418	7	38349355	38350022							1
ENSG00000230987	AL359976.1		4.25053	0.793797	2.43806	0.0327767	2.4208	1	189989570	189993097		1					0
ENSG00000215808	LINC01139	long intergenic non-protein coding RNA 1139	3.98963	0.756091	2.34827	0.0267182	2.39962	1	238480384	238486023			1				0
ENSG00000225359	AL358393.1		3.37276	0.648916	2.61432	0.0386271	2.37783	1	181190471	181191149		1					0
ENSG00000279891	AC022498.2		4.33852	0.853656	2.37797	0.0335353	2.34548	3	188178543	188180812		1					0
ENSG00000250402	AC109471.1		7.79774	1.55649	2.29958	0.00519636	2.32476	5	125376828	125377439		1					0
ENSG00000237686	AL109615.3		7.75685	1.57204	2.24464	0.00311818	2.30283	6	43995723	44074652		1					0
ENSG00000005981	ASB4	ankyrin repeat and SOCS box containing 4	3.89925	0.81595	2.24088	0.0354639	2.25664	7	95478444	95540232							1
ENSG00000261460	AC009690.2		4.69057	1.04284	2.1014	0.0287194	2.16924	15	72278867	72351794		1					0
ENSG00000214102	WEE2	WEE1 homolog 2	5.3082	1.24758	1.93406	0.0306777	2.08909	7	141708353	141731271							1
ENSG00000270230	MTND6P22	mitochondrially encoded NADH:ubiquinone oxidoreductase core subunit 6 pseudogene 22	53.7187	12.6996	2.07603	3.51189e-05	2.08064	5	100046450	100046970	1						0
ENSG00000250497	AC007126.1		5.61468	1.3296	2.03982	0.0456883	2.07822	4	13777377	13782157		1					0
ENSG00000272230	MIR3666	microRNA 3666	12.1355	2.92973	2.16776	0.000424985	2.05039	7	114653345	114653455				1			0
ENSG00000232474	NCKAP5-IT1	NCKAP5 intronic transcript 1	3.98571	0.973374	2.27074	0.0427515	2.03377	2	133431666	133433897							1
ENSG00000269220	LINC00528	long intergenic non-protein coding RNA 528	4.2513	1.04284	1.96373	0.0373648	2.02738	22	17777322	17779481			1				0
ENSG00000228918	LINC01344	long intergenic non-protein coding RNA 1344	4.77779	1.17217	1.82666	0.0468971	2.02716	1	182129310	182314061			1				0
ENSG00000175197	AC022506.1	DNA damage inducible transcript 3 #or# NA	6.57576	1.6319	1.99904	0.0100028	2.0106	12	57516588	57521737							1
ENSG00000230612	AC004039.1		4.07293	1.02069	1.94708	0.0459017	1.99652	5	132688681	132723725		1					0
ENSG00000203786	KPRP	keratinocyte proline rich protein	5.52745	1.39907	1.7914	0.0402615	1.98215	1	152759561	152762052							1
ENSG00000262902	MTCO1P40	mitochondrially encoded cytochrome c oxidase I pseudogene 40	334.68	84.9912	1.97576	7.20727e-09	1.9774	17	53105734	53106358	1						0
ENSG00000109163	GNRHR	gonadotropin releasing hormone receptor	4.99312	1.26974	1.90642	0.0471834	1.97541	4	67739328	67754360							1
ENSG00000285064	AL662820.1		5.61076	1.46487	1.98822	0.0301879	1.93743	6	33321386	33329286		1					0
ENSG00000279501	CR392039.3		4.07293	1.08055	1.93466	0.0445903	1.9143	21	8996496	9018670		1					0
ENSG00000106331	PAX4	paired box 4	8.02559	2.1611	1.88325	0.00853474	1.89284	7	127610292	127618114							1
ENSG00000221933	OR2A25	olfactory receptor family 2 subfamily A member 25	4.8226	1.30744	1.86183	0.0437993	1.88306	7	144069811	144075870							1
ENSG00000271500	AC005183.1		6.27396	1.70137	1.71342	0.045743	1.88268	12	1695830	1698044		1					0
ENSG00000260008	AP001527.1		5.34517	1.47448	1.74223	0.0370658	1.85803	11	102107886	102109842		1					0
ENSG00000233321	AL357833.1		6.70387	1.85879	1.84665	0.0247454	1.85063	10	3486894	3502838		1					0
ENSG00000227496	AC099066.2		6.9192	1.92826	1.7577	0.0286838	1.8433	1	225700604	225752243		1					0
ENSG00000198695	MT-ND6	mitochondrially encoded NADH:ubiquinone oxidoreductase core subunit 6	15928.2	4474.35	1.83176	1.24709e-09	1.83183	0	14149	14673						1	0
ENSG00000153294	ADGRF4	adhesion G protein-coupled receptor F4	4.99704	1.40501	1.8627	0.0351158	1.8305	6	47685864	47722021							1
ENSG00000254132	MTND6P3	mitochondrially encoded NADH:ubiquinone oxidoreductase core subunit 6 pseudogene 3	117.209	33.4642	1.80504	8.35797e-06	1.80839	5	94568929	94569470	1						0
ENSG00000232177	MTND4P24	mitochondrially encoded NADH:ubiquinone oxidoreductase core subunit 4 pseudogene 24	29.5438	8.44626	1.79749	1.72286e-06	1.80647	0	126472885	126473281	1						0
ENSG00000237480	AL355306.2		9.77015	2.81963	1.73767	0.00434426	1.79288	1	105956694	106124564		1					0
ENSG00000166510	CCDC68	coiled-coil domain containing 68	6.39739	1.87435	1.7633	0.0170571	1.7711	18	54901509	54959508							1
ENSG00000267541	MTCO2P2	mitochondrially encoded cytochrome c oxidase II pseudogene 2	138.937	40.8478	1.76167	7.81045e-06	1.7661	18	47853233	47853457	1						0
ENSG00000169900	PYDC1	pyrin domain containing 1	8.32423	2.44785	1.77541	0.0111299	1.7658	16	31215962	31217359							1
ENSG00000278972	AC015920.1		6.18206	1.82109	1.69813	0.0225443	1.76329	17	69433084	69435533		1					0
ENSG00000104324	CPQ	carboxypeptidase Q	10.3878	3.08422	1.68423	0.00605379	1.75191	8	96645227	97149654							1
ENSG00000249119	MTND6P4	mitochondrially encoded NADH:ubiquinone oxidoreductase core subunit 6 pseudogene 4	839.938	250.451	1.74463	2.11361e-09	1.74576	5	134924123	134924644	1						0
ENSG00000247627	MTND4P12	mitochondrially encoded NADH:ubiquinone oxidoreductase core subunit 4L pseudogene 30 #or# mitochondrially encoded NADH:ubiquinone oxidoreductase core subunit 4 pseudogene 12 /// mitochondrially encoded NADH:ubiquinone oxidoreductase core subunit 4 pseudogene 12	992.458	298.273	1.73337	7.98545e-10	1.73437	5	134926660	134928036	1						0
ENSG00000120738	EGR1	early growth response 1	32.6455	9.84466	1.74969	4.29726e-07	1.72947	5	138465490	138469315							1
ENSG00000270906	MTND4P35	mitochondrially encoded NADH:ubiquinone oxidoreductase core subunit 4L pseudogene 5 #or# mitochondrially encoded NADH:ubiquinone oxidoreductase core subunit 4 pseudogene 35 /// mitochondrially encoded NADH:ubiquinone oxidoreductase core subunit 4 pseudogene 35	118.416	35.72	1.71638	1.70659e-07	1.72906	5	100048988	100050362	1						0
ENSG00000210117	MT-TW	mitochondrially encoded tRNA tryptophan	733.396	221.902	1.72467	1.00775e-09	1.72467	0	5512	5579						1	0
ENSG00000234429	AC105342.1		5.17541	1.57204	1.6334	0.0457783	1.71903	2	81194337	81201184		1					0
ENSG00000164761	TNFRSF11B	TNF receptor superfamily member 11b	6.79109	2.06353	1.6669	0.0198449	1.71853	8	118923557	118952200							1
ENSG00000180964	TCEAL8	transcription elongation factor A like 8	11.796	3.58826	1.73564	0.00236103	1.71694	0	103252995	103255203							1
ENSG00000198840	MT-ND3	mitochondrially encoded NADH:ubiquinone oxidoreductase core subunit 3 #or# mitochondrially encoded tRNA arginine /// mitochondrially encoded NADH:ubiquinone oxidoreductase core subunit 3 #or# mitochondrially encoded tRNA arginine #or# mitochondrially encoded NADH:ubiquinone oxidoreductase core subunit 4L /// mitochondrially encoded NADH:ubiquinone oxidoreductase core subunit 3	14936.7	4554.33	1.71349	2.50989e-08	1.71355	0	10059	10404						1	0
ENSG00000210164	MT-TG	mitochondrially encoded cytochrome c oxidase III #or# mitochondrially encoded tRNA glycine /// mitochondrially encoded NADH:ubiquinone oxidoreductase core subunit 3 #or# mitochondrially encoded tRNA glycine /// mitochondrially encoded tRNA glycine	6140.72	1874.28	1.71188	9.9666e-08	1.71207	0	9991	10058						1	0
ENSG00000233355	CHRM3-AS2	CHRM3 antisense RNA 2	5.65556	1.72947	1.78703	0.0262287	1.70934	1	239703381	239730465							1
ENSG00000229344	MTCO2P12	mitochondrially encoded cytochrome c oxidase II pseudogene 12	4580.54	1404.44	1.7053	1.62276e-08	1.70553	1	632757	633438	1						0
ENSG00000198695	MT-TE	mitochondrially encoded NADH:ubiquinone oxidoreductase core subunit 6 #or# mitochondrially encoded tRNA glutamic acid /// mitochondrially encoded tRNA glutamic acid	3040.94	938.592	1.69555	2.08168e-08	1.69595	0	14149	14673						1	0
ENSG00000210151	MT-TS1	mitochondrially encoded tRNA serine 1 (UCN)	1197.35	370.502	1.69131	2.17673e-08	1.69229	0	7446	7514						1	0
ENSG00000249780	AC093809.1		9.77091	3.03097	1.58204	0.00716114	1.68872	4	12640298	12640637		1					0
ENSG00000228253	MT-ATP8	mitochondrially encoded ATP synthase membrane subunit 8 /// mitochondrially encoded tRNA lysine #or# mitochondrially encoded ATP synthase membrane subunit 8	6728	2094.69	1.68327	1.81313e-08	1.68344	0	8366	8572						1	0
ENSG00000215878	MARCKSL1P2	MARCKS like 1 pseudogene 2	16.122	5.03464	1.61118	0.000799175	1.67907	6	138402585	138403560	1						0
ENSG00000210100	MT-TI	mitochondrially encoded tRNA isoleucine	889.432	278.174	1.67509	3.9695e-09	1.6769	0	4263	4331						1	0
ENSG00000176302	FOXR1	forkhead box R1	7.8928	2.47	1.70013	0.0117871	1.67602	11	118971707	118981291							1
ENSG00000235481	UBE2R2-AS1	UBE2R2 antisense RNA 1	5.21238	1.6319	1.69793	0.0447637	1.67539	9	33785950	33818795							1
ENSG00000246790	AP000977.1		8.80907	2.75977	1.58425	0.0153042	1.67444	11	121447331	121453013		1					0
ENSG00000239039	SNORD13	small nucleolar RNA, C/D box 13	6.70387	2.10124	1.65233	0.0151225	1.67375	8	33513475	33513578					1		0
ENSG00000273394	AC128687.2		7.23428	2.28082	1.71415	0.0311726	1.6653	3	113947005	113947570		1					0
ENSG00000229604	MTATP8P2	mitochondrially encoded ATP synthase 8 pseudogene 2	239.313	75.6861	1.65732	6.40456e-06	1.6608	2	87824942	87825143	1						0
ENSG00000143178	TBX19	T-box 19	6.09407	1.93421	1.71998	0.028617	1.65566	1	168281040	168314426							1
ENSG00000154438	ASZ1	ankyrin repeat, SAM and basic leucine zipper domain containing 1	6.92704	2.1988	1.70025	0.0212952	1.65552	7	117363222	117428123							1
ENSG00000264954	PRR29-AS1	PRR29 antisense RNA 1	7.45429	2.37244	1.60165	0.027704	1.6517	17	63996071	63999899							1
ENSG00000198712	MT-CO2	mitochondrially encoded cytochrome c oxidase II #or# mitochondrially encoded tRNA lysine /// mitochondrially encoded cytochrome c oxidase II	24346.8	7764.36	1.64875	3.34224e-08	1.64879	0	7586	8269						1	0
ENSG00000210112	MT-TM	mitochondrially encoded tRNA methionine /// mitochondrially encoded NADH:ubiquinone oxidoreductase core subunit 2 #or# mitochondrially encoded tRNA methionine	2349.07	751.16	1.64449	2.6812e-08	1.6449	0	4402	4469						1	0
ENSG00000210107	MT-TQ	mitochondrially encoded tRNA glutamine	2296.4	736.806	1.63956	2.64366e-08	1.64002	0	4329	4400						1	0
ENSG00000182557	SPNS3	sphingolipid transporter 3 (putative)	7.01034	2.25272	1.57452	0.0251649	1.63782	17	4433688	4488208							1
ENSG00000198786	MT-ND5	mitochondrially encoded NADH:ubiquinone oxidoreductase core subunit 5	74295	23876	1.63769	3.54409e-08	1.6377	0	12337	14148						1	0
ENSG00000210176	MT-TH	mitochondrially encoded tRNA histidine #or# mitochondrially encoded tRNA serine 2 (AGU/C) /// mitochondrially encoded tRNA histidine	3066.46	986.433	1.63591	1.17084e-08	1.63628	0	12138	12206						1	0
ENSG00000234336	JAZF1-AS1	JAZF1 antisense RNA 1	6.09015	1.96597	1.57111	0.0379358	1.63124	7	28180322	28243917							1
ENSG00000240409	MTATP8P1	mitochondrially encoded ATP synthase 8 pseudogene 1	243.405	78.8552	1.62331	1.131e-05	1.62608	1	633535	633741	1						0
ENSG00000198899	MT-ATP6	mitochondrially encoded ATP synthase membrane subunit 6 #or# mitochondrially encoded ATP synthase membrane subunit 8 /// mitochondrially encoded ATP synthase membrane subunit 6 /// mitochondrially encoded ATP synthase membrane subunit 6 #or# mitochondrially encoded cytochrome c oxidase III	25879.4	8386.98	1.62554	2.35199e-08	1.62558	0	8527	9207						1	0
ENSG00000257327	AC012555.1		9.76231	3.16624	1.60926	0.00954972	1.62445	12	103841451	103844664		1					0
ENSG00000185296	AC026785.1		8.93565	2.90164	1.68164	0.00584539	1.62271	5	17306381	17306960		1					0
ENSG00000228048	AL355314.2		5.77976	1.88689	1.78811	0.0481342	1.615	10	55506219	55513217		1					0
ENSG00000210191	MT-TL2	mitochondrially encoded tRNA histidine #or# mitochondrially encoded tRNA serine 2 (AGU/C) #or# mitochondrially encoded tRNA leucine 2 (CUN) /// mitochondrially encoded NADH:ubiquinone oxidoreductase core subunit 5 #or# mitochondrially encoded tRNA leucine 2 (CUN) /// mitochondrially encoded tRNA serine 2 (AGU/C) #or# mitochondrially encoded tRNA leucine 2 (CUN) /// mitochondrially encoded tRNA le…	4983.87	1633.49	1.60908	5.60968e-08	1.60931	0	12266	12336						1	0
ENSG00000248527	MTATP6P1	mitochondrially encoded ATP synthase 6 pseudogene 1 /// mitochondrially encoded ATP synthase 8 pseudogene 1 #or# mitochondrially encoded ATP synthase 6 pseudogene 1	7758.94	2545.2	1.60794	1.39108e-08	1.60808	1	633696	634376	1						0
ENSG00000197584	KCNMB2	potassium calcium-activated channel subfamily M regulatory beta subunit 2	8.72185	2.86393	1.56488	0.0133528	1.60664	3	178272932	178844429							1
ENSG00000198886	MT-ND4	mitochondrially encoded NADH:ubiquinone oxidoreductase core subunit 4 #or# mitochondrially encoded NADH:ubiquinone oxidoreductase core subunit 4L /// mitochondrially encoded NADH:ubiquinone oxidoreductase core subunit 4 #or# mitochondrially encoded tRNA histidine /// mitochondrially encoded NADH:ubiquinone oxidoreductase core subunit 4	59542	19597	1.60325	4.77727e-08	1.60327	0	10760	12137						1	0
ENSG00000151790	TDO2	tryptophan 2,3-dioxygenase	7.36239	2.4257	1.62401	0.0121123	1.60177	4	155854738	155920406							1
ENSG00000269028	MTRNR2L12	MT-RNR2 like 12	698.933	230.397	1.59954	4.58408e-09	1.60104	3	96617188	96618236							1
ENSG00000230533	AL356234.2		16.7529	5.52613	1.50139	0.00358647	1.60007	6	137657998	137763984		1					0
ENSG00000149243	KLHL35	kelch like family member 35	35.3652	11.7293	1.54665	4.26558e-06	1.59221	11	75422394	75430629							1
ENSG00000210156	MT-TK	mitochondrially encoded tRNA lysine	1085.9	362.672	1.58064	3.89479e-09	1.58215	0	8295	8364						1	0
ENSG00000198938	MT-CO3	mitochondrially encoded cytochrome c oxidase III	26458.5	8856.48	1.57889	1.20641e-07	1.57893	0	9207	9990						1	0
ENSG00000179256	SMCO3	single-pass membrane protein with coiled-coil domains 3	6.1318	2.05392	1.68878	0.046924	1.57793	12	14804650	14814182							1
ENSG00000225630	MTND2P28	mitochondrially encoded NADH:ubiquinone oxidoreductase core subunit 2 pseudogene 28	11045.8	3701.29	1.5773	1.94341e-07	1.57739	1	629640	630683	1						0
ENSG00000231768	LINC01354	long intergenic non-protein coding RNA 1354	13.8438	4.64731	1.51989	0.00356337	1.57478	1	234527891	234531779			1				0
ENSG00000253958	CLDN23	claudin 23	5.8709	1.97191	1.63549	0.0483913	1.57399	8	8701938	8704106							1
ENSG00000133878	DUSP26	dual specificity phosphatase 26	6.88223	2.31258	1.51047	0.033875	1.57337	8	33591332	33600106							1
ENSG00000198763	MT-ND2	mitochondrially encoded NADH:ubiquinone oxidoreductase core subunit 2 #or# mitochondrially encoded tRNA tryptophan /// mitochondrially encoded NADH:ubiquinone oxidoreductase core subunit 2	32577.3	10966.6	1.57072	1.35289e-07	1.57075	0	4470	5511						1	0
ENSG00000210144	MT-TY	mitochondrially encoded tRNA cysteine #or# mitochondrially encoded tRNA tyrosine /// mitochondrially encoded tRNA tyrosine	3910.12	1322.95	1.56323	3.19027e-07	1.56346	0	5826	5891						1	0
ENSG00000197223	C1D	C1D nuclear receptor corepressor	13.9374	4.73234	1.49429	0.00226237	1.55833	2	68041130	68110948							1
ENSG00000210049	MT-TF	mitochondrially encoded tRNA phenylalanine #or# mitochondrially encoded 12S RNA /// mitochondrially encoded tRNA phenylalanine	3098.94	1052.31	1.55792	2.54038e-08	1.55822	0	577	647						1	0
ENSG00000231460	AL365204.1		8.7635	2.97705	1.55493	0.0199885	1.55762	9	23829670	23849914		1					0
ENSG00000210195	MT-TT	mitochondrially encoded tRNA threonine	1977.92	675.066	1.55036	4.22572e-07	1.55089	0	15888	15953						1	0
ENSG00000225649	AC064875.1		6.92388	2.37244	1.50809	0.035164	1.54521	2	12966784	13007013		1					0
ENSG00000209082	MT-TL1	mitochondrially encoded tRNA leucine 1 (UUA/G) #or# mitochondrially encoded 16S RNA /// mitochondrially encoded tRNA leucine 1 (UUA/G)	3210.9	1100.91	1.5439	3.2457e-07	1.54428	0	3230	3304						1	0
ENSG00000227115	LINC01630	long intergenic non-protein coding RNA 1630	7.93368	2.728	1.5868	0.0166285	1.54015	18	51346249	51643939			1				0
ENSG00000278791	MIR6723	microRNA 6723	368.266	127.017	1.53002	3.3083e-09	1.53573	1	632325	632413				1			0
ENSG00000255435	AP001267.3		25.4528	8.78032	1.52956	6.39484e-05	1.53548	11	118511911	118531094		1					0
ENSG00000210135	MT-TN	mitochondrially encoded tRNA asparagine #or# mitochondrially encoded tRNA cysteine /// mitochondrially encoded tRNA alanine #or# mitochondrially encoded tRNA asparagine /// mitochondrially encoded tRNA asparagine	2961.61	1022.85	1.53341	8.19383e-07	1.53379	0	5657	5729						1	0
ENSG00000198744	MTCO3P12	mitochondrially encoded cytochrome c oxidase III pseudogene 12 /// mitochondrially encoded cytochrome c oxidase III pseudogene 12 #or# mitochondrially encoded ATP synthase 6 pseudogene 1	4041.1	1396.19	1.53301	9.70141e-08	1.53326	1	634376	634922	1						0
ENSG00000225972	MTND1P23	mitochondrially encoded NADH:ubiquinone oxidoreductase core subunit 1 pseudogene 23	4291.04	1492.61	1.52326	2.28531e-07	1.52349	1	629062	629433	1						0
ENSG00000198727	MT-CYB	mitochondrially encoded cytochrome b /// mitochondrially encoded cytochrome b #or# mitochondrially encoded tRNA threonine	49555.7	17244.3	1.52291	2.29373e-07	1.52293	0	14747	15887						1	0
ENSG00000210154	MT-TD	mitochondrially encoded tRNA aspartic acid /// mitochondrially encoded cytochrome c oxidase II #or# mitochondrially encoded tRNA aspartic acid	3830.7	1333.58	1.52202	6.18386e-07	1.5223	0	7518	7585						1	0
ENSG00000227764	LINC01693	long intergenic non-protein coding RNA 1693	6.00369	2.10124	1.48854	0.0486749	1.51461	1	211639695	211654581			1				0
ENSG00000198804	MT-CO1	mitochondrially encoded cytochrome c oxidase I	56161.4	19711.9	1.51049	1.26579e-07	1.51051	0	5904	7445						1	0
ENSG00000255823	MTRNR2L8	MT-RNR2 like 8	542.869	190.614	1.50721	7.82148e-10	1.50995	11	10507887	10509189							1
ENSG00000210140	MT-TC	mitochondrially encoded tRNA cysteine	379.424	133.352	1.50592	7.13977e-06	1.50858	0	5761	5826						1	0
ENSG00000153294	ADGRF2	adhesion G protein-coupled receptor F2 /// adhesion G protein-coupled receptor F4 #or# adhesion G protein-coupled receptor F2	6.35574	2.23651	1.55306	0.0301617	1.50681	6	47685864	47722021							1
ENSG00000237973	MTCO1P12	mitochondrially encoded cytochrome c oxidase I pseudogene 12	14240.8	5016.72	1.50513	2.4671e-07	1.50521	1	631074	632616	1						0
ENSG00000210196	MT-TP	mitochondrially encoded tRNA proline	4168.02	1474.22	1.49913	8.8355e-07	1.49941	0	15956	16023						1	0
ENSG00000228933	AC107419.1		5.8709	2.08569	1.48072	0.0430388	1.49306	0	27174920	27398997		1					0
ENSG00000266709	AC005224.4		8.23701	2.93934	1.48396	0.0223275	1.48663	17	14303854	14305505		1					0
ENSG00000172247	C1QTNF4	C1q and TNF related 4	7.23036	2.58312	1.54613	0.0256167	1.48495	11	47589664	47594659							1
ENSG00000267141	AC012615.4		8.10813	2.90164	1.47856	0.0284915	1.4825	19	1860250	1862019		1					0
ENSG00000273338	AC103591.3		18.2798	6.61923	1.45463	0.000562601	1.46552	1	78004346	78004554		1					0
ENSG00000144681	STAC	SH3 and cysteine rich domain	7.93445	2.87948	1.42656	0.0260746	1.46232	3	36380344	36548007							1
ENSG00000210127	MT-TA	mitochondrially encoded tRNA alanine	1998.02	726.536	1.4588	5.63161e-07	1.45947	0	5587	5655						1	0
ENSG00000198888	MT-ND1	mitochondrially encoded NADH:ubiquinone oxidoreductase core subunit 1 #or# mitochondrially encoded tRNA isoleucine /// mitochondrially encoded NADH:ubiquinone oxidoreductase core subunit 1 #or# mitochondrially encoded tRNA leucine 1 (UUA/G) /// mitochondrially encoded NADH:ubiquinone oxidoreductase core subunit 1	35662.3	13002	1.45564	3.25302e-07	1.45566	0	3307	4262						1	0
ENSG00000210082	MT-RNR2	mitochondrially encoded 16S RNA	61836	22682.8	1.44683	1.15485e-06	1.44685	0	1671	3229						1	0
ENSG00000235984	GPC5-AS1	GPC5 antisense RNA 1	13.0973	4.80775	1.39344	0.0113041	1.44584	13	92701389	92721614							1
ENSG00000146147	MLIP	muscular LMNA interacting protein	7.7152	2.83217	1.48143	0.0262498	1.4458	6	53929982	54266280							1
ENSG00000248923	MTND5P11	mitochondrially encoded NADH:ubiquinone oxidoreductase core subunit 5 pseudogene 11	352.729	130.214	1.43516	1.12746e-05	1.43767	5	134924648	134926459	1						0
ENSG00000267659	LINC01482	long intergenic non-protein coding RNA 1482	7.05668	2.60527	1.48424	0.0286315	1.43755	17	68591796	68763882			1				0
ENSG00000162814	SPATA17	spermatogenesis associated 17	17.439	6.44559	1.44497	0.000996283	1.43593	1	217631324	217871696							1
ENSG00000200488	RN7SKP203	RNA, 7SK small nuclear pseudogene 203	6.66221	2.47	1.46833	0.0381327	1.43149	2	76445079	76445410	1						0
ENSG00000252337	RF00322	NA /// tumor protein, translationally-controlled 1 #or# NA	6.48385	2.41015	1.45995	0.0430343	1.42773	5	106546665	106546803							1
ENSG00000280058	AL117378.2		8.36827	3.12853	1.44555	0.0273835	1.41944	6	131910191	131911527		1					0
ENSG00000211459	MT-RNR1	mitochondrially encoded 12S RNA	30454.8	11413	1.41595	1.31612e-06	1.41599	0	648	1601						1	0
ENSG00000243316	GUCY2GP	guanylate cyclase 2G, pseudogene	7.5824	2.84178	1.36599	0.0392955	1.41586	10	112308181	112356574	1						0
ENSG00000106410	NOBOX	NOBOX oogenesis homeobox	7.23036	2.71245	1.4145	0.0476774	1.41447	7	144397240	144410227							1
ENSG00000212907	MT-ND4L	mitochondrially encoded NADH:ubiquinone oxidoreductase core subunit 4L /// mitochondrially encoded tRNA arginine #or# mitochondrially encoded NADH:ubiquinone oxidoreductase core subunit 4L	13719.8	5149.97	1.41355	1.15496e-06	1.41362	0	10470	10766						1	0
ENSG00000265179	AP000894.2		6.35182	2.38799	1.40175	0.0437858	1.41137	18	902766	906667		1					0
ENSG00000236968	AL451164.2		7.14705	2.6903	1.40603	0.0442973	1.40958	10	3223816	3227407		1					0
ENSG00000120094	HOXB1	homeobox B1	6.88223	2.59273	1.35138	0.0484807	1.4084	17	48528526	48531001							1
ENSG00000230021	AL669831.3		1110.28	421.228	1.39715	5.42911e-08	1.39825	1	586071	827796		1					0
ENSG00000152977	ZIC1	Zic family member 1	15.0682	5.73747	1.35421	0.00402846	1.39302	3	147393422	147510293							1
ENSG00000165259	HDX	highly divergent homeobox	14.3318	5.46261	1.4046	0.00332507	1.39156	0	84317874	84502479							1
ENSG00000266978	AC011511.2		10.2133	3.90678	1.35192	0.023763	1.3864	19	10252268	10285108		1					0
ENSG00000184719	RNLS	renalase, FAD dependent amine oxidase	7.66963	2.93934	1.3587	0.0341443	1.38366	10	88273864	88584530							1
ENSG00000283160	MIR4521	microRNA 4521	11.5642	4.44192	1.42004	0.010395	1.38041	17	8186945	8187004				1			0
ENSG00000234474	MIR3663HG	MIR3663 host gene	7.80634	2.9992	1.36269	0.0375879	1.38007	10	117158656	117169059				1			0
ENSG00000215018	COL28A1	collagen type XXVIII alpha 1 chain	8.58905	3.30151	1.40984	0.0208154	1.37937	7	7356203	7535853							1
ENSG00000230916	MTCO1P53	mitochondrially encoded cytochrome c oxidase I pseudogene 53	8.45626	3.2572	1.40065	0.0274664	1.37639	0	126471705	126472403	1						0
ENSG00000125648	SLC25A23	solute carrier family 25 member 23	15.9483	6.33247	1.30314	0.00297157	1.33256	19	6436079	6465203							1
ENSG00000210077	MT-TV	mitochondrially encoded tRNA valine #or# mitochondrially encoded 16S RNA /// mitochondrially encoded tRNA valine /// mitochondrially encoded tRNA valine #or# mitochondrially encoded 12S RNA	4885.8	1943.4	1.3298	2.86275e-06	1.33001	0	1602	1670						1	0
ENSG00000253553	AC090568.2		12.7492	5.0945	1.26729	0.00987238	1.3234	8	88326836	88737134		1					0
ENSG00000204128	C2orf72	chromosome 2 open reading frame 72	10.2087	4.07975	1.36091	0.0160795	1.32324	2	231037490	231049719							1
ENSG00000049246	PER3	period circadian regulator 3	7.23428	2.90164	1.28511	0.0498982	1.31798	1	7784320	7845177							1
ENSG00000105398	SULT2A1	sulfotransferase family 2A member 1	9.46683	3.80554	1.41375	0.0299453	1.31478	19	47870466	47886397							1
ENSG00000228800	AL590068.1		9.998	4.01989	1.28896	0.021586	1.31448	10	30553854	30554483		1					0
ENSG00000248734	AC008906.1		7.88496	3.18839	1.29673	0.0386494	1.30628	5	96784777	96785999		1					0
ENSG00000275175	AC106028.5		7.01034	2.84178	1.27487	0.0492341	1.30269	15	92819598	92819992		1					0
ENSG00000204740	MALRD1	MAM and LDL receptor class A domain containing 1	15.8233	6.43664	1.29448	0.00416158	1.29767	10	19048771	19790401							1
ENSG00000176771	NCKAP5	NCK associated protein 5	15.252	6.22897	1.20813	0.0111987	1.29194	2	132671799	133568463							1
ENSG00000264464	AC091170.1		21.0318	8.59774	1.29199	0.000971583	1.29054	18	49499390	49501860		1					0
ENSG00000261670	AC012213.2		9.28531	3.80261	1.23497	0.0318056	1.28796	8	103464389	103468985		1					0
ENSG00000236668	AC006450.3		15.6905	6.43965	1.24347	0.00524046	1.28484	9	124006277	124009396		1					0
ENSG00000259972	AC009120.2		8.98199	3.68949	1.22832	0.0367851	1.28361	16	74305127	74335346		1					0
ENSG00000204262	COL5A2	collagen type V alpha 2 chain	15.4249	6.34208	1.23903	0.00518772	1.28224	2	189031896	189179879							1
ENSG00000124092	CTCFL	CCCTC-binding factor like	15.8603	6.55277	1.26292	0.00406063	1.27524	20	57495966	57525652							1
ENSG00000124749	COL21A1	collagen type XXI alpha 1 chain	12.0576	4.98732	1.22137	0.0194961	1.27361	6	56056590	56394094							1
ENSG00000260192	LINC02240	long intergenic non-protein coding RNA 2240	14.3326	5.9607	1.24834	0.00735633	1.26575	5	124808981	125602227			1				0
ENSG00000125869	LAMP5	lysosomal associated membrane protein family member 5	7.93368	3.30151	1.32314	0.0347885	1.26487	20	9514358	9530524							1
ENSG00000268324	LRRC2-AS1	LRRC2 antisense RNA 1	13.359	5.58599	1.19109	0.0172306	1.25793	3	46557398	46559694							1
ENSG00000167085	PHB	prohibitin	25.0662	10.6583	1.18949	0.000760627	1.23376	17	49404049	49414905							1
ENSG00000000971	CFH	complement factor H	18.3254	7.81949	1.23515	0.00427881	1.2287	1	196651878	196747504							1
ENSG00000144619	CNTN4	contactin 4	12.1402	5.18245	1.23557	0.0142535	1.22808	3	2098813	3057956							1
ENSG00000174951	FUT1	fucosyltransferase 1 (H blood group)	8.01699	3.44639	1.22942	0.0367127	1.21798	19	48748011	48755390							1
ENSG00000163737	PF4	platelet factor 4	9.3348	4.01989	1.21666	0.0342739	1.21546	4	73981077	73982124							1
ENSG00000228835	AC012123.1		21.3343	9.20235	1.22399	0.00212106	1.2131	18	32769795	32774413		1					0
ENSG00000082074	FYB1	FYN binding protein 1	9.51316	4.11746	1.21787	0.0253499	1.20817	5	39105255	39274528							1
ENSG00000130396	AFDN	afadin, adherens junction formation factor	68.4076	29.6426	1.18896	4.07335e-08	1.20649	6	167826922	167972023							1
ENSG00000136546	SCN7A	sodium voltage-gated channel alpha subunit 7	37.6001	16.367	1.18994	5.96791e-05	1.19995	2	166403573	166494326							1
ENSG00000206432	TMEM200C	transmembrane protein 200C	14.8214	6.46774	1.16644	0.0119244	1.19634	18	5882072	5895955							1
ENSG00000250822	LINC02111	long intergenic non-protein coding RNA 2111	27.7349	12.2052	1.16064	0.000254931	1.1842	5	17378906	17387310			1				0
ENSG00000173627	APOBEC4	apolipoprotein B mRNA editing enzyme catalytic polypeptide like 4	13.0973	5.78112	1.16035	0.0158968	1.17985	1	183646404	183653316							1
ENSG00000233920	AL162595.2		8.19459	3.62002	1.18531	0.0387365	1.17867	1	229223461	229227562		1					0
ENSG00000270069	MIR222HG	MIR222 host gene	12.185	5.38719	1.19323	0.0178251	1.1775	0	45745211	45770274				1			0
ENSG00000131475	VPS25	vacuolar protein sorting 25 homolog	16.3868	7.28964	1.21727	0.00626075	1.16861	17	42773436	42779599							1
ENSG00000261325	LINC02192	long intergenic non-protein coding RNA 2192	22.352	9.95778	1.20649	0.00301793	1.16651	16	47849314	47887130			1				0
ENSG00000164129	NPY5R	neuropeptide Y receptor Y5	15.4296	6.87788	1.11038	0.0136669	1.16567	4	163343939	163351934							1
ENSG00000196166	C8orf86	chromosome 8 open reading frame 86	11.3119	5.04718	1.12072	0.0322411	1.16429	8	38510834	38528662							1
ENSG00000188032	C19orf67	chromosome 19 open reading frame 67	9.94851	4.45747	1.17619	0.0474483	1.15826	19	14081619	14085875							1
ENSG00000239672	NME1	NME/NM23 nucleoside diphosphate kinase 1	12.3594	5.54462	1.19154	0.0157876	1.15645	17	51153536	51162428							1
ENSG00000184619	AC135178.2	ribosomal protein L26 #or# NA /// KRAB-A domain containing 2 #or# NA	11.4392	5.13221	1.12218	0.028163	1.15634	17	8368637	8376711							1
ENSG00000244921	MTCYBP18	mitochondrially encoded cytochrome b pseudogene 18	34.852	15.727	1.12251	0.0134392	1.14799	5	134923303	134924049	1						0
ENSG00000285280	AL390957.1		15.4257	6.97545	1.10239	0.0114795	1.14498	1	192167786	192957713		1					0
ENSG00000187862	TTC24	tetratricopeptide repeat domain 24	11.4314	5.16991	1.11998	0.0270587	1.14479	1	156579727	156586770							1
ENSG00000226383	LINC01876	long intergenic non-protein coding RNA 1876	10.6896	4.83584	1.16126	0.0230004	1.14437	2	156011530	156254950			1				0
ENSG00000197576	HOXA4	homeobox A4	11.4731	5.19206	1.12322	0.0323697	1.14387	7	27128507	27130799							1
ENSG00000261105	LMO7-AS1	LMO7 antisense RNA 1	8.49791	3.85286	1.18135	0.0453448	1.14118	13	75604700	75635994							1
ENSG00000254685	FPGT	fucose-1-phosphate guanylyltransferase	13.5413	6.14329	1.10896	0.0202138	1.14028	1	74198212	74234086							1
ENSG00000100097	LGALS1	galectin 1	17.3203	7.87275	1.10993	0.0116083	1.13752	22	37675608	37679806							1
ENSG00000276176	MIR6090	microRNA 6090	11.3905	5.18245	1.14386	0.0318197	1.13613	11	128522390	128522449				1			0
ENSG00000155099	PIP4P2	phosphatidylinositol-4,5-bisphosphate 4-phosphatase 2	12.4883	5.68356	1.08901	0.0270516	1.13571	8	90993796	91041064							1
ENSG00000163682	RPL9	ribosomal protein L9	22.2207	10.1129	1.09428	0.00267465	1.1357	4	39452521	39458949							1
ENSG00000236051	AC001226.2	MYCBP2 antisense RNA 1 #or# NA /// NA	11.7881	5.3968	1.07012	0.0341548	1.12716	13	77026767	77129717							1
ENSG00000165948	IFI27L1	interferon alpha inducible protein 27 like 1	12.3602	5.66735	1.10559	0.0328083	1.12496	14	94081282	94103846							1
ENSG00000230148	HOXB-AS1	HOXB cluster antisense RNA 1	15.729	7.21789	1.06696	0.0176047	1.12378	17	48543551	48551250							1
ENSG00000273611	ZNHIT3	zinc finger HIT-type containing 3	20.778	9.55857	1.11718	0.00265381	1.12019	17	36486629	36499310							1
ENSG00000284196	AL158064.1		14.5016	6.67248	1.12085	0.0116082	1.11992	13	80041725	80074557		1					0
ENSG00000265496	MIR1539	NA #or# microRNA 1539	12.2227	5.62964	1.12716	0.0214556	1.11845	18	49487339	49491878				1			0
ENSG00000112406	HECA	hdc homolog, cell cycle regulator	15.8155	7.30585	1.12003	0.0106619	1.11422	6	139135112	139180802							1
ENSG00000144452	ABCA12	ATP binding cassette subfamily A member 12	13.2387	6.12113	1.07354	0.0302433	1.11289	2	214931542	215138428							1
ENSG00000280331	AC061999.1		11.7426	5.43744	1.17015	0.0216185	1.11075	11	36510361	36510537		1					0
ENSG00000105700	KXD1	KxDL motif containing 1	12.2722	5.68356	1.07742	0.0284482	1.11053	19	18557762	18569387							1
ENSG00000145451	GLRA3	glycine receptor alpha 3	29.6602	13.7676	1.12428	0.000373586	1.10725	4	174636914	174829314							1
ENSG00000107949	BCCIP	BRCA2 and CDKN1A interacting protein	12.9354	6.02056	1.11069	0.0219665	1.10336	10	125823546	125853695							1
ENSG00000091129	NRCAM	neuronal cell adhesion molecule	25.0678	11.6982	1.05714	0.00228709	1.09955	7	108147623	108456717							1
ENSG00000198822	GRM3	glutamate metabotropic receptor 3	18.7144	8.82764	1.06673	0.00611466	1.08405	7	86643914	86864884							1
ENSG00000168679	SLC16A4	solute carrier family 16 member 4	10.3831	4.91125	1.1064	0.0346466	1.08007	1	110362848	110391082							1
ENSG00000145681	HAPLN1	hyaluronan and proteoglycan link protein 1	9.73165	4.60895	1.12015	0.0419109	1.07825	5	83637805	83721613							1
ENSG00000152578	GRIA4	glutamate ionotropic receptor AMPA type subunit 4	9.46367	4.49583	1.04919	0.0488081	1.07381	11	105609994	105982092							1
ENSG00000250451	HOXC-AS1	HOXC cluster antisense RNA 1	11.3041	5.37164	1.0456	0.0482623	1.07341	12	53999022	54000010							1
ENSG00000282840	AC004554.2		8.75882	4.17732	1.13242	0.0479445	1.06816	0	11668401	11757718		1					0
ENSG00000279359	AL359195.2		13.1971	6.30071	1.05632	0.0252969	1.06663	10	80249710	80254121		1					0
ENSG00000003509	NDUFAF7	NADH:ubiquinone oxidoreductase complex assembly factor 7	23.7499	11.3516	1.02128	0.00392106	1.06503	2	37231631	37253403							1
ENSG00000232132	NDFIP2-AS1	NDFIP2 antisense RNA 1	17.0044	8.13141	1.03413	0.0134763	1.06433	13	79477364	79481231							1
ENSG00000165185	KIAA1958	KIAA1958	16.2123	7.75963	1.07514	0.0121327	1.06303	9	112486847	112669397							1
ENSG00000226902	CHCHD2P1	coiled-coil-helix-coiled-coil-helix domain containing 2 pseudogene 1	23.2643	11.1587	1.08729	0.00245225	1.05995	0	123785009	123785451	1						0
ENSG00000184898	RBM43	RNA binding motif protein 43	28.7408	13.8586	1.06943	0.00101677	1.05232	2	151247940	151261879							1
ENSG00000177406	AC021054.1		12.4467	6.01396	1.06157	0.0330226	1.04937	12	630891	663706		1					0
ENSG00000225913	AL138767.3		17.8004	8.61329	1.02284	0.0130005	1.04728	10	87607985	87659279		1					0
ENSG00000087076	HSD17B14	hydroxysteroid 17-beta dehydrogenase 14	11.7465	5.6895	1.0451	0.0413816	1.04585	19	48813017	48836678							1
ENSG00000172461	FUT9	fucosyltransferase 9	16.8292	8.17571	1.04478	0.0135758	1.04155	6	96015984	96215612							1
ENSG00000198258	UBL5	ubiquitin like 5	13.4171	6.54976	1.00934	0.0364864	1.03456	19	9827892	9830115							1
ENSG00000248441	LINC01197	long intergenic non-protein coding RNA 1197	12.3092	6.02357	1.03567	0.0291458	1.03104	15	95209099	95327129			1				0
ENSG00000226953	AC010890.1		10.2535	5.03097	1.11256	0.0426162	1.0272	2	133264968	133284762		1					0
ENSG00000275936	AC004263.1		20.5045	10.0878	1.03258	0.00578559	1.02334	12	120224744	120225421		1					0
ENSG00000167968	DNASE1L2	deoxyribonuclease 1 like 2	17.3518	8.53788	1.03141	0.00951199	1.02313	16	2235816	2238711							1
ENSG00000054938	CHRDL2	chordin like 2	10.3375	5.10704	1.03483	0.0476753	1.01733	11	74696429	74731385							1
ENSG00000278291	AL161772.1		11.477	5.67395	1.03565	0.0358184	1.01632	13	20699307	20703718		1					0
ENSG00000250608	AC010210.1		15.2922	7.56385	1.04409	0.0187403	1.0156	3	131325092	131381475		1					0
ENSG00000108830	RND2	Rho family GTPase 2	16.7373	8.28289	1.02169	0.0154484	1.01486	17	43025241	43032036							1
ENSG00000167077	MEI1	meiotic double-stranded break formation protein 1	15.6859	7.93261	1.0282	0.0138603	0.983596	22	41699499	41799456							1
ENSG00000233018	AL732292.1		3.50947	0	4.54852	0.0146898	?	1	235097187	235097412		1					0
ENSG00000253515	AC018682.2		3.02463	0	4.33215	0.00207543	?	2	46499731	46501278		1					0
ENSG00000279544	AL133243.4		2.89184	0	4.30582	0.00244647	?	2	32563328	32566436		1					0
ENSG00000270569	AC068276.1		2.14609	0	3.86744	0.0477196	?	2	57429548	57430693		1					0
ENSG00000243422	RPL23AP49	ribosomal protein L23a pseudogene 49	2.45725	0	4.00602	0.0245558	?	3	75624275	75670156	1						0
ENSG00000211749	TRBV23-1	T cell receptor beta variable 23-1 (non-functional)	2.10052	0	3.8507	0.0356358	?	7	142645961	142646467							1
ENSG00000211714	TRBV7-3	T cell receptor beta variable 7-3	2.32446	0	3.95266	0.0413337	?	7	142384329	142384841							1
ENSG00000253681	AC013509.1		3.19831	0	4.44705	0.00744951	?	8	76576551	76579345		1					0
ENSG00000187988	KCTD9P3	potassium channel tetramerization domain containing 9 pseudogene 3	2.36534	0	4.03017	0.0290876	?	9	37477149	37478317	1						0
ENSG00000279394	AC015871.4		2.62701	0	4.14187	0.0111103	?	15	79875920	79878179		1					0
ENSG00000184716	AC018512.1	serine incorporator 4 #or# NA	2.85018	0	4.28173	0.00761489	?	15	43794162	43800221							1
ENSG00000261770	AC006504.1		2.05887	0	3.85367	0.0123548	?	19	27757184	27760849		1					0
ENSG00000260339	HEXA-AS1	HEXA antisense RNA 1	7.63266	14.4645	-1.02267	0.0336116	-0.922263	15	72376113	72378788							1
ENSG00000118217	ATF6	activating transcription factor 6	6.84134	13.2097	-1.04578	0.0295487	-0.949246	1	161766294	161964070							1
ENSG00000166897	ELFN2	extracellular leucine rich repeat and fibronectin type III domain containing 2	8.06724	15.9886	-1.02143	0.0263029	-0.986896	22	37367960	37427470							1
ENSG00000227733	AC239809.3		8.59297	17.132	-1.01188	0.0174799	-0.995467	1	148159213	148255012		1					0
ENSG00000184270	HIST2H2AB	histone cluster 2 H2A family member b	7.23036	14.486	-1.03764	0.024117	-1.00252	1	149887524	149887916							1
ENSG00000261409	AL035425.3		17.4767	35.0998	-1.01115	0.00206146	-1.00603	0	108719949	108724944		1					0
ENSG00000100288	CHKB	choline kinase beta	8.53956	17.2044	-1.00249	0.0238354	-1.01055	22	50578949	50601455							1
ENSG00000225264	ZNRF2P2	zinc and ring finger 2 pseudogene 2	7.80166	15.8054	-1.00305	0.0277279	-1.01856	7	29598795	29685255	1						0
ENSG00000171303	KCNK3	potassium two pore domain channel subfamily K member 3	5.43631	11.0264	-1.08275	0.0414051	-1.02027	2	26692690	26733420							1
ENSG00000212952	BX088651.1		9.67901	19.7314	-1.0392	0.00857883	-1.02756	9	42568865	42569315		1					0
ENSG00000254166	CASC19	cancer susceptibility 19 (non-protein coding)	5.56834	11.4647	-1.06386	0.0280122	-1.04188	8	127072694	127227541							1
ENSG00000188338	SLC38A3	solute carrier family 38 member 3	6.22294	12.8475	-1.04379	0.0288563	-1.04582	3	50205246	50221486							1
ENSG00000104899	AMH	anti-Mullerian hormone #or# microRNA 4321 /// anti-Mullerian hormone	10.0805	20.8429	-1.03015	0.00750615	-1.04799	19	2249309	2252073							1
ENSG00000226174	TEX22	testis expressed 22	8.28573	17.1674	-1.02479	0.0169573	-1.05097	14	105398579	105450106							1
ENSG00000060709	RIMBP2	RIMS binding protein 2	4.42966	9.25032	-1.1844	0.0408448	-1.06231	12	130396137	130716281							1
ENSG00000265491	RNF115	ring finger protein 115	16.4355	34.397	-1.05246	0.000380538	-1.06546	1	145738868	145824077							1
ENSG00000196826	AC008758.1	NA #or# zinc finger protein 564 /// NA #or# zinc finger protein 709 /// NA #or# zinc finger protein 709 #or# NA	10.2141	21.4016	-1.1459	0.00290064	-1.06716	19	12461559	12551474							1
ENSG00000267125	AC012615.3		5.6933	11.9303	-1.07643	0.0436668	-1.0673	19	1852382	1853622		1					0
ENSG00000137656	BUD13	BUD13 homolog	8.19535	17.2044	-1.06612	0.0123538	-1.0699	11	116748170	116772988							1
ENSG00000244486	SCARF2	scavenger receptor class F member 2	6.22294	13.1882	-1.09105	0.0259615	-1.08358	22	20424815	20437826							1
ENSG00000007384	RHBDF1	rhomboid 5 homolog 1	6.39662	13.6155	-1.02822	0.035555	-1.08987	16	58059	76355							1
ENSG00000092054	MYH7	myosin heavy chain 7	10.5599	22.5263	-1.08464		-1.09301	14	23412738	23435718							1
ENSG00000187626	ZKSCAN4	zinc finger with KRAB and SCAN domains 4	6.47993	13.8785	-1.10341	0.02496	-1.0988	6	28244623	28252224							1
ENSG00000259029	DUX4L18	double homeobox 4 like 18	5.51885	11.8328	-1.08173	0.0335896	-1.10035	0	11321557	11322823							1
ENSG00000117394	AC099795.1	NA /// solute carrier family 2 member 1 #or# NA	7.7066	16.534	-1.09776	0.0121844	-1.10127	1	42925375	42959176							1
ENSG00000144233	AMMECR1L	AMMECR1 like	10.0712	21.6374	-1.01941	0.00884938	-1.10329	2	127861630	127885922							1
ENSG00000089639	GMIP	GEM interacting protein	6.53018	14.0352	-1.11405	0.0210219	-1.10385	19	19629476	19643667							1
ENSG00000174652	ZNF266	zinc finger protein 266	7.09288	15.2917	-1.03572	0.0208256	-1.10831	19	9412598	9435578							1
ENSG00000237436	CAMTA1-DT	CAMTA1 divergent transcript	7.66026	16.5303	-1.03004	0.0244745	-1.10965	1	6783892	6784843							1
ENSG00000225828	FAM229A	family with sequence similarity 229 member A	5.43163	11.7293	-1.0999	0.0307052	-1.11066	1	32361270	32364278							1
ENSG00000232648	AC107214.1		14.3318	30.9986	-1.14423	0.000611102	-1.11298	4	183494938	183504494		1					0
ENSG00000188681	TEKT4P2	tektin 4 pseudogene 2	4.47055	9.70345	-1.1345	0.0485072	-1.11805	21	9068361	9129752	1						0
ENSG00000263818	AC091178.1		6.09091	13.254	-1.15343	0.0178707	-1.1217	17	39057019	39113190		1					0
ENSG00000211892	IGHG4	immunoglobulin heavy constant gamma 4 (G4m marker)	4.12319	8.97545	-1.22406	0.0440536	-1.12222	14	105620506	105626066							1
ENSG00000259224	SLC35G6	solute carrier family 35 member G6	4.16407	9.10478	-1.14629	0.0479245	-1.12863	17	7481332	7483496							1
ENSG00000162086	ZNF75A	zinc finger protein 75a #or# NA /// zinc finger protein 75a	5.74279	12.6272	-1.18242	0.0173085	-1.13672	16	3305406	3318852							1
ENSG00000180370	PAK2	p21 (RAC1) activated kinase 2	11.609	25.7105	-1.11095	0.00257175	-1.14712	3	196739857	196832647							1
ENSG00000153930	ANKFN1	ankyrin repeat and fibronectin type III domain containing 1	4.77779	10.6051	-1.26884	0.0238693	-1.15034	17	55882301	56511659							1
ENSG00000227195	MIR663AHG	MIR663A host gene #or# microRNA 663a /// MIR663A host gene	8.76273	19.6086	-1.14633	0.00389807	-1.16204	20	26186920	26251526				1			0
ENSG00000247708	STX18-AS1	STX18 antisense RNA 1 (head to head)	6.30625	14.1778	-1.18971	0.0147672	-1.16878	4	4542131	4710938							1
ENSG00000112144	ICK	intestinal cell kinase	11.5673	26.0542	-1.14222	0.000971203	-1.17146	6	53001279	53061802							1
ENSG00000148400	NOTCH1	notch 1 /// notch 1 #or# microRNA 4673	10.9953	25.2346	-1.13131	0.00146426	-1.19852	9	136494433	136545786							1
ENSG00000277379	MIR6724-3	microRNA 6724-3	7.05199	16.2184	-1.17477	0.0103303	-1.20153	21	8388362	8388453				1			0
ENSG00000167306	MYO5B	myosin VB #or# NA /// myosin VB	5.43163	12.4949	-1.15555	0.0237337	-1.20188	18	49822813	50195093							1
ENSG00000228157	AC007952.2		3.37276	7.7848	-1.24037	0.0494991	-1.20673	17	19092974	19096837		1					0
ENSG00000104856	RELB	RELB proto-oncogene, NF-kB subunit	5.74202	13.2917	-1.17796	0.0240667	-1.2109	19	45001430	45038198							1
ENSG00000160183	TMPRSS3	transmembrane serine protease 3	3.7248	8.66061	-1.23313	0.0452641	-1.2173	21	42371837	42396846							1
ENSG00000162006	MSLNL	mesothelin-like /// mesothelin-like #or# NA	3.28554	7.73154	-1.24238	0.0493456	-1.23463	16	769428	783370							1
ENSG00000230806	SRGAP2-AS1	SRGAP2 antisense RNA 1	3.5967	8.59114	-1.33227	0.0411328	-1.25618	1	121360156	121398806							1
ENSG00000131269	ABCB7	ATP binding cassette subfamily B member 7	5.17072	12.362	-1.24461	0.0151363	-1.25747	0	75051554	75156732							1
ENSG00000278996	FP671120.1		44.4414	106.311	-1.28298	8.89795e-12	-1.25831	21	8197620	8227646		1					0
ENSG00000204099	NEU4	neuraminidase 4	6.22763	14.9673	-1.30289	0.0075949	-1.26506	2	241808825	241817413							1
ENSG00000171970	ZNF57	zinc finger protein 57	7.40796	17.8474	-1.26605	0.00486568	-1.26857	19	2900898	2918476							1
ENSG00000275692	MIR6724-4	microRNA 6724-4	8.75882	21.2398	-1.23057	0.00525569	-1.27796	21	8432530	8432621				1			0
ENSG00000277368	AL138966.2		3.63758	8.8283	-1.29695	0.0370764	-1.27916	13	26222191	26222654		1					0
ENSG00000280614	FP236383.2		193.383	475.094	-1.30132	2.76585e-17	-1.29675	21	8393419	8394341		1					0
ENSG00000237343	AC246785.3		3.94406	9.69978	-1.22824	0.0382493	-1.29827	1	144418113	144419192		1					0
ENSG00000273937	RF01518		127.035	313.076	-1.30329	3.17922e-17	-1.30129	2201	149259	149348		1					0
ENSG00000101158	NELFCD	negative elongation factor complex member C/D	4.5122	11.2887	-1.34457	0.0178761	-1.32297	20	58981208	58995133							1
ENSG00000281181	FP236383.3		182.728	457.505	-1.32498	5.88587e-18	-1.32409	21	8437629	8438551		1					0
ENSG00000175699	CCDC197	coiled-coil domain containing 197	4.16799	10.6547	-1.37975	0.0167325	-1.35406	14	93987225	94008863							1
ENSG00000253741	AC108002.1		6.5255	16.7949	-1.32321	0.00445932	-1.36387	8	142702252	142726973		1					0
ENSG00000235421	AC114501.2		3.98963	10.3081	-1.35217	0.0272087	-1.36945	7	65525629	65554744		1					0
ENSG00000065491	TBC1D22B	TBC1 domain family member 22B	3.8576	10.0812	-1.43301	0.0192874	-1.38589	6	37257772	37332970							1
ENSG00000280800	FP671120.3		174.359	459.091	-1.4038	6.50669e-21	-1.39672	21	8210384	8211306		1					0
ENSG00000233672	RNASEH2B-AS1	RNASEH2B antisense RNA 1	3.98571	10.6672	-1.36813	0.0162526	-1.42027	13	50862172	50910764							1
ENSG00000162552	WNT4	Wnt family member 4	3.28554	8.85574	-1.4058	0.0301159	-1.43048	1	22117305	22143969							1
ENSG00000256034	AP002770.1		4.46663	12.1195	-1.43353	0.0101769	-1.44008	11	73760563	73761070		1					0
ENSG00000273730	RNA5-8SN2	RNA, 5.8S ribosomal N2	25.808	70.7088	-1.43666	1.80053e-09	-1.45407	2201	155997	156149							1
ENSG00000101493	ZNF516	zinc finger protein 516	2.84627	7.8291	-1.42467	0.0339693	-1.45978	18	76358190	76495190							1
ENSG00000119686	FLVCR2	feline leukemia virus subgroup C cellular receptor family member 2	2.71424	7.48843	-1.50967	0.0336127	-1.46412	14	75578617	75663214							1
ENSG00000275215	RNA5-8SN1	RNA, 5.8S ribosomal N1	26.3392	73.4339	-1.48887	1.02433e-09	-1.47923	21	8395607	8395759							1
ENSG00000280109	PLAC4	placenta specific 4	3.80734	10.6487	-1.41998	0.0129168	-1.48382	21	41175231	41186788							1
ENSG00000281383	FP671120.4		137.271	385.833	-1.50107	2.46812e-17	-1.49095	21	8254592	8255514		1					0
ENSG00000188511	C22orf34	chromosome 22 open reading frame 34	2.93741	8.26668	-1.47873	0.0209772	-1.49276	22	49414524	49657542							1
ENSG00000220891	AC246793.1		2.49814	7.10412	-1.47368	0.0430903	-1.5078	22	22559343	22566602		1					0
ENSG00000275708	MIR3648-1	microRNA 3648-1	5.9542	17.0026	-1.48497	0.00337634	-1.51378	21	8208473	8208652				1			0
ENSG00000173110	HSPA6	heat shock protein family A (Hsp70) member 6	4.16016	11.8801	-1.53532	0.0168744	-1.51384	1	161524540	161526910							1
ENSG00000167641	PPP1R14A	protein phosphatase 1 regulatory inhibitor subunit 14A	2.67259	7.71533	-1.5633	0.0258652	-1.52949	19	38251237	38256591							1
ENSG00000139835	GRTP1	growth hormone regulated TBC protein 1	2.84627	8.40855	-1.4922	0.0207242	-1.56279	13	113324164	113364148							1
ENSG00000198690	FAN1	FANCD2 and FANCI associated nuclease 1	5.0387	15.0374	-1.63396	0.0014466	-1.57743	15	30903852	30943108							1
ENSG00000260657	AC107871.2		3.0702	9.22751	-1.63512	0.0144678	-1.58761	15	68267792	68277994		1					0
ENSG00000106538	RARRES2	retinoic acid receptor responder 2	2.10444	6.36057	-1.49502	0.0474024	-1.59572	7	150338317	150341674							1
ENSG00000264462	MIR3648-2	microRNA 3648-2	4.68588	14.2879	-1.57837	0.00503373	-1.6084	21	8986999	8987178				1			0
ENSG00000182492	BGN	biglycan	2.45333	7.51653	-1.69517	0.0205187	-1.61532	0	153494939	153509554							1
ENSG00000276164	DUX4L20	double homeobox 4 like 20	1.88519	5.79667	-1.64999	0.0429703	-1.62052	10	133683668	133684936							1
ENSG00000213799	ZNF845	zinc finger protein 845	3.28554	10.1542	-1.60384	0.0116678	-1.62788	19	53333746	53356906							1
ENSG00000233577	AL022332.1		2.06355	6.5276	-1.76633	0.0391123	-1.66142	22	25279529	25282674		1					0
ENSG00000277437	MIR3687-1	microRNA 3687-1	5.65088	17.9899	-1.64305	0.0310097	-1.67064	21	8208844	8208904				1			0
ENSG00000197345	MRPL21	mitochondrial ribosomal protein L21	2.53979	8.1218	-1.63316	0.0167773	-1.67709	11	68891276	68903835							1
ENSG00000285370	AL449105.5		2.19166	7.05086	-1.68222	0.0240151	-1.68577	9	113087317	113087738		1					0
ENSG00000274917	RNA5-8SN3	RNA, 5.8S ribosomal N3	22.2663	72.9927	-1.72344	9.71748e-12	-1.71289	2201	112025	112177							1
ENSG00000106258	CYP3A5	cytochrome P450 family 3 subfamily A member 5	2.19166	7.24005	-1.72943	0.016741	-1.72397	7	99648194	99680026							1
ENSG00000162398	LEXM	lymphocyte expansion molecule	1.75239	5.82477	-1.63125	0.046963	-1.73287	1	54806063	54842252							1
ENSG00000176894	PXMP2	peroxisomal membrane protein 2 #or# NA /// peroxisomal membrane protein 2	2.49814	8.39894	-1.67618	0.0259622	-1.74935	12	132687606	132704991							1
ENSG00000235098	ANKRD65	ankyrin repeat domain 65	1.92607	6.61923	-1.60622	0.0328433	-1.781	1	1418420	1421769							1
ENSG00000261029	AC138304.1		1.83962	6.35463	-1.78019	0.0262423	-1.7884	16	82170296	82175803		1					0
ENSG00000206190	ATP10A	ATPase phospholipid transporting 10A (putative)	1.27224	4.39827	-1.98331	0.0443926	-1.78957	15	25677273	25865172							1
ENSG00000275950	MIR6724-1	microRNA 6724-1	5.51885	19.1008	-1.76457	0.00428373	-1.7912	21	8205315	8205406				1			0
ENSG00000167766	ZNF83	zinc finger protein 83	2.0133	7.11666	-1.67399	0.0247974	-1.82164	19	52594060	52690496							1
ENSG00000227039	ITGB2-AS1	ITGB2 antisense RNA 1	2.75904	9.88897	-1.74341	0.0134611	-1.84165	21	44921051	44929678							1
ENSG00000275401	AL391095.3		1.35869	4.95923	-1.81975	0.037417	-1.86789	20	38418483	38419202		1					0
ENSG00000157021	FAM92A1P1	family with sequence similarity 92 member A1 pseudogene 1	1.44592	5.45666	-1.90221	0.0382497	-1.91603	15	41163162	41164374	1						0
ENSG00000087237	CETP	cholesteryl ester transfer protein	1.93076	7.35911	-1.96375	0.0179531	-1.93036	16	56961850	56983845							1
ENSG00000267166	AC007993.1		1.53314	6.00801	-2.02239	0.0231806	-1.9704	17	43922775	43927388		1					0
ENSG00000275110	MIR6087	microRNA 6087	3.94406	15.4594	-1.92986	0.000662486	-1.97073	0	109054542	109054590				1			0
ENSG00000169509	CRCT1	cysteine rich C-terminal 1	1.35869	5.32734	-1.86503	0.04158	-1.97119	1	152514502	152516010							1
ENSG00000142541	SNORD32A	ribosomal protein L13a #or# small nucleolar RNA, C/D box 32A	1.44592	5.78112	-1.97709	0.0315858	-1.99936	19	49487554	49492308					1		0
ENSG00000177947	ODF3	outer dense fiber of sperm tails 3	1.49149	5.96371	-2.02967	0.0202252	-1.99946	11	196738	200261							1
ENSG00000278041	AL133325.3		1.6196	6.59707	-1.87298	0.027306	-2.02619	20	21499261	21502934		1					0
ENSG00000176593	AC008969.1		3.63758	15.0212	-2.01609	0.000372724	-2.04595	19	58002061	58011232		1					0
ENSG00000206549	PRSS50	serine protease 50 /// serine protease 50 #or# serine protease 46, pseudogene /// serine protease 50 #or# NA /// serine protease 50 #or# serine protease 50	1.27224	5.48476	-2.25234	0.0222902	-2.10806	3	46712115	46812574	1						0
ENSG00000225032	AL162586.1		1.6196	6.98733	-1.90675	0.0195283	-2.1091	9	127816066	127822520		1					0
ENSG00000282897	AL162727.3		1.09387	4.90531	-2.1674	0.0275902	-2.1649	9	113614589	113617375		1					0
ENSG00000279801	AC111170.3		1.1811	5.37465	-2.28039	0.0262555	-2.18605	17	77444704	77447167		1					0
ENSG00000275238	MIR4734	microRNA 4734	1.13944	5.19206	-2.22666	0.0409968	-2.18798	17	38702262	38702331				1			0
ENSG00000279625	AL591122.1		1.44592	6.68804	-2.17725	0.016436	-2.2096	1	22364630	22366482		1					0
ENSG00000272582	AL031587.3		1.88519	8.7234	-2.1898	0.00575018	-2.21018	22	37950965	37951778		1					0
ENSG00000264515	AC011474.1		1.57871	7.31546	-2.30271	0.00767677	-2.2122	19	29287011	29525752		1					0
ENSG00000234949	AC104667.2		1.18501	5.51652	-2.30776	0.0202152	-2.21885	2	237591020	237595981		1					0
ENSG00000269106	AC012313.7		1.2259	5.77452	-2.02175	0.0316907	-2.23586	19	58475355	58475763		1					0
ENSG00000279026	AC005225.4		0.832968	3.93788	-2.39496	0.0491314	-2.24109	14	73580694	73582918		1					0
ENSG00000271792	AC008667.4		0.832968	4.00434	-2.4097	0.0405188	-2.26523	5	139775305	139775472		1					0
ENSG00000280409	LINC01101	long intergenic non-protein coding RNA 1101	0.832968	4.01989	-2.41181	0.0431168	-2.27082	2	120464335	120466218			1				0
ENSG00000280193	AC132219.2		0.878539	4.31626	-2.52563	0.0418551	-2.2966	8	81696368	81698694		1					0
ENSG00000206418	RAB12	RAB12, member RAS oncogene family	1.40035	6.92747	-2.20469	0.0125039	-2.30654	18	8609445	8639381							1
ENSG00000226945	AC098935.1		1.13944	5.84692	-2.35946	0.0218017	-2.35935	1	206907619	206908229		1					0
ENSG00000234883	MIR155HG	MIR155 host gene /// MIR155 host gene #or# microRNA 155	0.832968	4.30664	-2.51205	0.0292891	-2.37023	21	25561909	25575168				1			0
ENSG00000226800	CACTIN-AS1	CACTIN antisense RNA 1	1.09387	5.82543	-2.39062	0.01605	-2.41292	19	3607247	3613930							1
ENSG00000269881	AC004754.1	family with sequence similarity 234 member A #or# NA /// NA	0.832968	4.47368	-2.5852	0.0256976	-2.42513	16	249547	269943							1
ENSG00000244280	ECEL1P2	endothelin converting enzyme like 1 pseudogene 2	0.787397	4.23123	-2.50465	0.0317987	-2.42591	2	232385750	232387457	1						0
ENSG00000102195	GPR50	G protein-coupled receptor 50	0.700174	3.80921	-2.40192	0.0476472	-2.44371	0	151176653	151181465							1
ENSG00000112494	UNC93A	unc-93 homolog A	0.832968	4.60895	-2.6035	0.0253181	-2.4681	6	167271169	167316019							1
ENSG00000223569	USP17L15	ubiquitin specific peptidase 17-like family member 15	0.700174	3.88462	-2.41701	0.0437652	-2.47199	4	9234385	9236334							1
ENSG00000216560	LINC00955	long intergenic non-protein coding RNA 955	0.43927	2.78192	-2.82412	0.0444638	-2.6629	4	3576869	3590711			1				0
ENSG00000268257	AIRN	antisense of IGF2R non-protein coding RNA	0.787397	5.06274	-2.76013	0.0162037	-2.68475	6	160003291	160007664							1
ENSG00000224346	BICD1P1	BICD cargo adaptor 1 pseudogene 1	0.43927	2.83217	-2.76084	0.0475913	-2.68873	2	200844240	200845461	1						0
ENSG00000126947	ARMCX1	armadillo repeat containing X-linked 1	0.43927	2.84178	-2.8395	0.0401026	-2.69362	0	101550531	101554700							1
ENSG00000271449	CT45A2	cancer/testis antigen family 45 member A2	0.43927	3.09677	-2.90146	0.0406944	-2.81758	0	135811668	135820012							1
ENSG00000184350	MRGPRE	MAS related GPR family member E	0.43927	3.12853	-2.97033	0.0285789	-2.83231	11	3227698	3232386							1
ENSG00000201822	RNA5SP149	RNA, 5S ribosomal pseudogene 149	0.393699	2.84178	-2.83834	0.0421894	-2.85163	3	180161886	180161977	1						0
ENSG00000169981	ZNF35	zinc finger protein 35	0.700174	5.28002	-2.80466	0.0164955	-2.91476	3	44648727	44660791							1
ENSG00000215115	CXorf49	chromosome X open reading frame 49	0.393699	2.97111	-2.94718	0.0270592	-2.91584	0	71714371	71718151							1
ENSG00000236372	AL353052.2		0.393699	2.98666	-2.93161	0.0423874	-2.92337	1	232174932	232180113		1					0
ENSG00000271466	CICP24	capicua transcriptional repressor pseudogene 24	0.393699	3.09677	-2.89346	0.0342708	-2.9756	7	63768257	63771047	1						0
ENSG00000233639	LINC01158	long intergenic non-protein coding RNA 1158	0.393699	3.12853	-2.96937	0.0302901	-2.99032	2	104807572	104853183			1				0
ENSG00000165215	CLDN3	claudin 3	0.43927	3.49069	-3.10701	0.031225	-2.99034	7	73768997	73770270							1
ENSG00000166847	AC008870.1	dynactin subunit 5 #or# NA	0.700174	5.57939	-2.94983	0.0154045	-2.99432	16	23641392	23677455							1
ENSG00000184635	ZNF93	zinc finger protein 93	0.393699	3.18179	-2.98439	0.0283424	-3.01467	19	19900913	19963464							1
ENSG00000167850	CD300C	CD300c molecule	0.393699	3.2261	-2.9887	0.0252551	-3.03463	17	74541108	74546143							1
ENSG00000283994	AC092652.3		0.306475	2.59933	-2.70485	0.0493697	-3.0843	2	143601517	143608759		1					0
ENSG00000267633	AC008686.1		0.43927	3.73974	-3.20813	0.0316074	-3.08976	19	13772118	13774118		1					0
ENSG00000227189	AC092535.1		0.61295	5.27342	-2.84005	0.0199918	-3.1049	4	1151372	1153701		1					0
ENSG00000233026	MTCO1P5	mitochondrially encoded cytochrome c oxidase I pseudogene 5	1.2259	11.0755	-3.14079		-3.17545	3	12165299	12165642	1						0
ENSG00000259345	AC013652.1		0.393699	3.56611	-3.11611	0.017579	-3.17919	15	38865322	39427195		1					0
ENSG00000238125	SLC9A3P2	solute carrier family 9 member 3 pseudogene 2	0.306475	2.91125	-2.91955	0.0366277	-3.2478	22	20652730	20654750	1						0
ENSG00000212993	POU5F1B	POU class 5 homeobox 1B	0.306475	2.91719	-2.85875	0.0349955	-3.25074	8	127322183	127420066							1
ENSG00000279516	FAM230C	family with sequence similarity 230 member C	0.393699	3.7649	-3.25958	0.0190829	-3.25745	13	18195297	18232024							1
ENSG00000205695	AL390205.1		0.306475	2.97705	-2.87334	0.0461498	-3.28004	6	139659928	139661513		1					0
ENSG00000229031	MTCO1P25	mitochondrially encoded cytochrome c oxidase I pseudogene 25	4.77626	46.6137	-3.27462		-3.2868	7	69331835	69333633	1						0
ENSG00000217483	FO393414.2		0.306475	3.10638	-2.96244	0.0381745	-3.34139	6	72522641	72523238		1					0
ENSG00000234576	MTND1P26	mitochondrially encoded NADH:ubiquinone oxidoreductase core subunit 1 pseudogene 26	3.19755	32.5457	-3.33232		-3.34743	2	131385700	131386237	1						0
ENSG00000279511	AL356274.2		0.306475	3.63558	-3.18869	0.0217305	-3.56834	13	37142967	37146718		1					0
ENSG00000204183	GDF5OS	growth differentiation factor 5 opposite strand	0.306475	3.65113	-3.1914	0.028113	-3.5745	20	35433029	35435450							1
ENSG00000260279	AC137932.1		0.306475	4.0576	-3.32462	0.0322034	-3.72678	16	89297508	89298317		1					0
ENSG00000224260	AL023754.1		0	2.31852	-3.4144	0.0163471	?	1	209528455	209567673		1					0
ENSG00000237700	PRAMEF33	PRAME family member 33	0	2.18325	-3.38442	0.0414112	?	1	13303539	13308907							1
ENSG00000241635	UGT1A1	UDP glucuronosyltransferase family 1 member A1 #or# UDP glucuronosyltransferase family 1 member A10 /// UDP glucuronosyltransferase family 1 member A1	0	2.02583	-3.32334	0.0283849	?	2	233760248	233773299							1
ENSG00000202512	RN7SKP230	RNA, 7SK small nuclear pseudogene 230	0	2.7346	-3.70615	0.0151926	?	5	109699500	109699834	1						0
ENSG00000241597	AC022121.1		0	2.04798	-3.3219	0.0446922	?	5	98954394	98954972		1					0
ENSG00000146049	KAAG1	kidney associated antigen 1	0	2.18325	-3.38426	0.040607	?	6	24356903	24358284							1
ENSG00000236761	CTAGE9	CTAGE family member 9	0	2.47	-3.55007	0.0136778	?	6	131708684	131711017							1
ENSG00000271537	AC009220.3		0	2.44785	-3.55154	0.0265193	?	7	139198557	139199142		1					0
ENSG00000148386	LCN9	lipocalin 9	0	3.27341	-4.01937	0.00422365	?	9	135663322	135666422							1
ENSG00000259854	AP005233.1		0	2.71245	-3.69844	0.01092	?	11	69414307	69416832		1					0
ENSG00000232105	RPL32P28	ribosomal protein L32 pseudogene 28	0	2.10124	-3.35116	0.041946	?	13	62327988	62328384	1						0
ENSG00000258722	CKAP2P1	cytoskeleton associated protein 2 pseudogene 1	0	2.32813	-3.50775	0.0244025	?	14	21110295	21113472	1						0
ENSG00000278979	AC007598.3		0	2.35623	-3.44973	0.024584	?	16	12374355	12376032		1					0
ENSG00000200558	RNA5SP429	RNA, 5S ribosomal pseudogene 429	0	2.9992	-3.83684	0.0060767	?	16	68742480	68742588	1						0
ENSG00000262831	AC145207.3		0	3.41462	-4.03101	0.0370413	?	17	81843165	81843958		1					0
ENSG00000131126	TEX101	testis expressed 101	0	2.61489	-3.66909	0.0128176	?	19	43401496	43418597							1
ENSG00000124091	GCNT7	glucosaminyl (N-acetyl) transferase family member 7	0	2.44785	-3.5501	0.0216648	?	20	56491492	56525925							1
ENSG00000236858	AL008638.2		0	3.09677	-3.87925	0.0161524	?	22	27048144	27060518		1					0
ENSG00000282222	AC073488.4		0	2.55503	-3.65421	0.011412	?	0	9410789	9411545		1					0
ENSG00000233571	AL592043.1		0	2.18325	-3.37693	0.0203619	?	0	34206725	34415537		1					0
ENSG00000273746	AC234791.1		0	2.04798	-3.32586	0.0334584	?	0	102259043	102261692		1					0
ENSG00000228354	AL450023.1		0	2.02583	-3.31833	0.036307	?	0	52655207	52657254		1					0
