# Supplementary material for: The role of reciprocal fusions in MLL-r acute leukemia: studying the chromosomal translocation t(6;11)
Source: Oncogene. 2021 Aug 5;40(40):5902–12. doi: 10.1038/s41388-021-01983-3 (PMC8497272; doi:10.1038/s41388-021-01983-3)
Supplement: Supplementary file 13 — ATAC-Seq exMLL-AF6/AF6-shMLL [file 41388_2021_1983_MOESM13_ESM.xlsx]

## Sheet: Sheet1
ID	gene symbol	gene	mean exp	mean mock	log2	pvalue	var-log2	chrom	begin	end	PG	NA	LINC	MIR	SNO	MT	PCG
ENSG00000118058	KMT2A	lysine methyltransferase 2A	2099.57	32.2381	6.04219	2.5698e-213	6.02518	11	118436490	118526832							1
ENSG00000232818	RPS2P32	ribosomal protein S2 pseudogene 32	4.53739	0.226893	3.95181	0.00267342	4.32178	7	23490473	23491364	1						0
ENSG00000259977	AL121578.3		3.98161	0.264599	3.88148	0.00439482	3.91147	0	37906147	37949405		1					0
ENSG00000234775	AC105940.2		3.25372	0.226893	3.31444	0.0284526	3.842	1	203127259	203127954		1					0
ENSG00000280371	AL136967.2		4.45133	0.324458	3.86258	0.023182	3.77813	6	41405819	41406561		1					0
ENSG00000251211	AC136632.2		3.04873	0.226893	3.24721	0.0334211	3.74812	5	178165702	178166562		1					0
ENSG00000179144	GIMAP7	GTPase, IMAP family member 7	2.92085	0.226893	3.38368	0.0211386	3.6863	7	150514830	150521073							1
ENSG00000275011	AC129492.6		4.13013	0.324458	3.7395	0.00863464	3.67008	17	8063936	8072533		1					0
ENSG00000233041	PHGR1	proline, histidine and glycine rich 1	2.8823	0.226893	3.2891	0.0422657	3.66713	15	40351033	40356434							1
ENSG00000255229	AC069287.3		2.87334	0.226893	3.2339	0.048405	3.66264	11	129279	186136		1					0
ENSG00000226968	LINC00423	long intergenic non-protein coding RNA 423	3.33978	0.264599	3.55685	0.0201396	3.65787	13	32877431	32911650			1				0
ENSG00000253967	AC022730.4		2.7069	0.226893	3.246	0.0319336	3.57656	8	70471134	70485687		1					0
ENSG00000270775	AP000436.1		2.7069	0.226893	3.24449	0.0395196	3.57656	11	65025390	65026515		1					0
ENSG00000259058	AF111169.2		3.08728	0.264599	3.34822	0.0263839	3.54446	14	76921840	76924649		1					0
ENSG00000224129	DPPA2P2	developmental pluripotency associated 2 pseudogene 2	3.07832	0.264599	3.32501	0.0474732	3.54026	1	26519354	26520250	1						0
ENSG00000182050	AC010196.1	NA /// MGAT4 family member C #or# NA	2.63876	0.226893	3.08857	0.0361293	3.53977	12	85955666	86838904							1
ENSG00000248318	AC104958.1		2.46336	0.226893	3.05884	0.0424918	3.44054	8	120761253	120776832		1					0
ENSG00000279672	AP006621.5		5.38421	0.529198	3.34845	0.0055203	3.34686	11	779617	780755		1					0
ENSG00000283361	CFAP97D2	CFAP97 domain containing 2	2.6298	0.264599	2.94288	0.0397357	3.31307	13	114154691	114223084							1
ENSG00000279302	AC013643.3		2.52255	0.264599	3.122	0.0324861	3.253	8	27701194	27703789		1					0
ENSG00000156575	PRG3	proteoglycan 3, pro eosinophil major basic protein 2	2.09194	0.226893	3.06034	0.0399544	3.20476	11	57376769	57381150							1
ENSG00000142511	GPR32	G protein-coupled receptor 32	3.94306	0.453786	2.95988	0.0305106	3.11923	19	50770464	50771732							1
ENSG00000241135	LINC00881	long intergenic non-protein coding RNA 881	2.7069	0.324458	3.24762	0.0243764	3.06054	3	157089881	157101135			1				0
ENSG00000130396	AFDN	afadin, adherens junction formation factor	245.59	29.6426	3.03395	2.06178e-53	3.05051	6	167826922	167972023							1
ENSG00000274553	AC138035.3		6.34996	0.793797	2.86902	0.00418937	2.99991	5	181329049	181331839		1					0
ENSG00000253734	LINC01289	long intergenic non-protein coding RNA 1289	3.88659	0.491492	2.72394	0.0340581	2.98327	8	63769430	63785501			1				0
ENSG00000163563	MNDA	myeloid cell nuclear differentiation antigen	4.31449	0.551351	2.94746	0.0319268	2.96814	1	158831317	158849506							1
ENSG00000226482	ADIPOQ-AS1	ADIPOQ antisense RNA 1	2.49296	0.324458	3.09649	0.0460275	2.94175	3	186851886	186856123							1
ENSG00000258926	AL355916.2		3.51517	0.529198	2.707	0.0477907	2.73172	14	61537508	61545287		1					0
ENSG00000249780	AC093809.1		19.7599	3.03097	2.57989	3.03368e-06	2.70472	4	12640298	12640637		1					0
ENSG00000170458	CD14	CD14 molecule	3.47662	0.551351	2.60809	0.0464468	2.65664	5	140631728	140633701							1
ENSG00000278530	CHMP1B2P	charged multivesicular body protein 1B2, pseudogene	3.09624	0.491492	2.54275	0.0389693	2.65528	0	80228489	80335364	1						0
ENSG00000279501	CR392039.3		6.57286	1.08055	2.56899	0.00560407	2.60476	21	8996496	9018670		1					0
ENSG00000229855	AC008568.1		6.31141	1.04284	2.43928	0.0128554	2.59744	5	121199704	121357398		1					0
ENSG00000225359	AL358393.1		3.90451	0.648916	2.7969	0.0256047	2.58904	1	181190471	181191149		1					0
ENSG00000169903	TM4SF4	transmembrane 4 L six family member 4	3.30123	0.551351	2.57902	0.0467783	2.58196	3	149473974	149503281							1
ENSG00000095110	NXPE1	neurexophilin and PC-esterase domain family member 1	2.89126	0.491492	2.50161	0.0471096	2.55646	11	114521645	114559895							1
ENSG00000262902	MTCO1P40	mitochondrially encoded cytochrome c oxidase I pseudogene 40	476.097	84.9912	2.48446	3.00985e-13	2.48587	17	53105734	53106358	1						0
ENSG00000275898	AC125603.4		5.29815	0.982985	2.19562	0.0238607	2.43025	12	116580974	116583672		1					0
ENSG00000232177	MTND4P24	mitochondrially encoded NADH:ubiquinone oxidoreductase core subunit 4 pseudogene 24	45.3011	8.44626	2.44279	1.6943e-11	2.42316	0	126472885	126473281	1						0
ENSG00000210117	MT-TW	mitochondrially encoded tRNA tryptophan	1184.7	221.902	2.41693	9.53952e-18	2.41652	0	5512	5579						1	0
ENSG00000198695	MT-ND6	mitochondrially encoded NADH:ubiquinone oxidoreductase core subunit 6	23691.5	4474.35	2.40458	1.53499e-15	2.40462	0	14149	14673						1	0
ENSG00000249119	MTND6P4	mitochondrially encoded NADH:ubiquinone oxidoreductase core subunit 6 pseudogene 4	1323.65	250.451	2.40104	1.49761e-16	2.40193	5	134924123	134924644	1						0
ENSG00000270230	MTND6P22	mitochondrially encoded NADH:ubiquinone oxidoreductase core subunit 6 pseudogene 22	67.1081	12.6996	2.40449	1.47969e-06	2.4017	5	100046450	100046970	1						0
ENSG00000101327	PDYN	prodynorphin	3.77663	0.718386	2.39721	0.0313646	2.39427	20	1978757	1994285							1
ENSG00000254306	AC137579.2		3.9341	0.756091	2.29658	0.0498873	2.3794	8	37600537	37625873		1					0
ENSG00000267541	MTCO2P2	mitochondrially encoded cytochrome c oxidase II pseudogene 2	210.783	40.8478	2.36607	1.57051e-09	2.36743	18	47853233	47853457	1						0
ENSG00000254132	MTND6P3	mitochondrially encoded NADH:ubiquinone oxidoreductase core subunit 6 pseudogene 3	169.825	33.4642	2.3418	6.15723e-09	2.34335	5	94568929	94569470	1						0
ENSG00000254235	AC022784.6		4.13013	0.81595	2.22938	0.0372284	2.33963	8	9249417	9413714		1					0
ENSG00000230916	MTCO1P53	mitochondrially encoded cytochrome c oxidase I pseudogene 53	16.2832	3.2572	2.28789	0.000144255	2.32168	0	126471705	126472403	1						0
ENSG00000211790	TRAV8-4	T cell receptor alpha variable 8-4	5.34566	1.08055	2.2948	0.0470081	2.3066	14	21894433	21895030							1
ENSG00000234787	LINC00458	long intergenic non-protein coding RNA 458	3.92515	0.793797	2.20753	0.0473503	2.3059	13	54115783	54132866			1				0
ENSG00000165509	MAGEC3	MAGE family member C3	5.21778	1.0584	2.37079	0.0142999	2.30156	0	141838316	141897832							1
ENSG00000175197	AC022506.1	DNA damage inducible transcript 3 #or# NA	8.0436	1.6319	2.27652	0.00279699	2.30129	12	57516588	57521737							1
ENSG00000210164	MT-TG	mitochondrially encoded cytochrome c oxidase III #or# mitochondrially encoded tRNA glycine /// mitochondrially encoded NADH:ubiquinone oxidoreductase core subunit 3 #or# mitochondrially encoded tRNA glycine /// mitochondrially encoded tRNA glycine	9188.89	1874.28	2.29344	9.44463e-13	2.29355	0	9991	10058						1	0
ENSG00000234592	AL359845.1		5.93103	1.20988	2.0864	0.0236844	2.29342	0	129041536	129043183		1					0
ENSG00000278433	MIR6070	microRNA 6070	6.38851	1.30744	2.22466	0.0208224	2.28873	21	43609887	43609989				1			0
ENSG00000210151	MT-TS1	mitochondrially encoded tRNA serine 1 (UCN)	1806.52	370.502	2.285	3.73264e-14	2.28566	0	7446	7514						1	0
ENSG00000247627	MTND4P12	mitochondrially encoded NADH:ubiquinone oxidoreductase core subunit 4L pseudogene 30 #or# mitochondrially encoded NADH:ubiquinone oxidoreductase core subunit 4 pseudogene 12 /// mitochondrially encoded NADH:ubiquinone oxidoreductase core subunit 4 pseudogene 12	1450.88	298.273	2.28184	5.47712e-16	2.28222	5	134926660	134928036	1						0
ENSG00000198840	MT-ND3	mitochondrially encoded NADH:ubiquinone oxidoreductase core subunit 3 #or# mitochondrially encoded tRNA arginine /// mitochondrially encoded NADH:ubiquinone oxidoreductase core subunit 3 #or# mitochondrially encoded tRNA arginine #or# mitochondrially encoded NADH:ubiquinone oxidoreductase core subunit 4L /// mitochondrially encoded NADH:ubiquinone oxidoreductase core subunit 3	22127.8	4554.33	2.28051	1.1962e-13	2.28055	0	10059	10404						1	0
ENSG00000226690	AC013470.2		4.13909	0.853656	2.29435	0.033446	2.27759	7	12469621	12542222		1					0
ENSG00000210112	MT-TM	mitochondrially encoded tRNA methionine /// mitochondrially encoded NADH:ubiquinone oxidoreductase core subunit 2 #or# mitochondrially encoded tRNA methionine	3613.14	751.16	2.2658	1.76688e-14	2.26606	0	4402	4469						1	0
ENSG00000257585	LINC00609	long intergenic non-protein coding RNA 609	5.81538	1.20988	1.95342	0.0497748	2.26501	14	36070427	36165288			1				0
ENSG00000229604	MTATP8P2	mitochondrially encoded ATP synthase 8 pseudogene 2	362.664	75.6861	2.25725	6.90572e-10	2.26054	2	87824942	87825143	1						0
ENSG00000198695	MT-TE	mitochondrially encoded NADH:ubiquinone oxidoreductase core subunit 6 #or# mitochondrially encoded tRNA glutamic acid /// mitochondrially encoded tRNA glutamic acid	4414.53	938.592	2.23342	1.5148e-13	2.23369	0	14149	14673						1	0
ENSG00000229344	MTCO2P12	mitochondrially encoded cytochrome c oxidase II pseudogene 12	6490.1	1404.44	2.20812	2.57201e-13	2.20825	1	632757	633438	1						0
ENSG00000155367	AL603832.3	protein phosphatase, Mg2+/Mn2+ dependent 1J #or# NA /// NA	4.70383	1.02069	2.06309	0.0482806	2.20429	1	112709994	112715477							1
ENSG00000210140	MT-TC	mitochondrially encoded tRNA cysteine	608.873	133.352	2.18935	5.86757e-11	2.19091	0	5761	5826						1	0
ENSG00000210107	MT-TQ	mitochondrially encoded tRNA glutamine	3356.72	736.806	2.18742	1.11512e-13	2.18769	0	4329	4400						1	0
ENSG00000285253	AC090517.4		4.74238	1.04284	2.12359	0.0389547	2.18509	15	56652488	56918571		1					0
ENSG00000228918	LINC01344	long intergenic non-protein coding RNA 1344	5.32774	1.17217	1.90829	0.0367233	2.18434	1	182129310	182314061			1				0
ENSG00000282849	AL359834.1		5.66957	1.24758	1.91126	0.0469758	2.1841	1	200478020	200483604		1					0
ENSG00000240409	MTATP8P1	mitochondrially encoded ATP synthase 8 pseudogene 1	358.016	78.8552	2.18048	3.28823e-09	2.18275	1	633535	633741	1						0
ENSG00000198786	MT-ND5	mitochondrially encoded NADH:ubiquinone oxidoreductase core subunit 5	108324	23876	2.18171	2.08286e-13	2.18171	0	12337	14148						1	0
ENSG00000198712	MT-CO2	mitochondrially encoded cytochrome c oxidase II #or# mitochondrially encoded tRNA lysine /// mitochondrially encoded cytochrome c oxidase II	34933.1	7764.36	2.16963	3.66158e-13	2.16966	0	7586	8269						1	0
ENSG00000225630	MTND2P28	mitochondrially encoded NADH:ubiquinone oxidoreductase core subunit 2 pseudogene 28	16401.7	3701.29	2.14768	1.36534e-12	2.14774	1	629640	630683	1						0
ENSG00000254298	AC008641.1		5.35733	1.20988	1.92866	0.0385807	2.14665	5	151158106	151158462		1					0
ENSG00000210100	MT-TI	mitochondrially encoded tRNA isoleucine	1229.85	278.174	2.14314	4.72832e-14	2.14442	0	4263	4331						1	0
ENSG00000210176	MT-TH	mitochondrially encoded tRNA histidine #or# mitochondrially encoded tRNA serine 2 (AGU/C) /// mitochondrially encoded tRNA histidine	4342.98	986.433	2.13816	8.7902e-14	2.13839	0	12138	12206						1	0
ENSG00000210144	MT-TY	mitochondrially encoded tRNA cysteine #or# mitochondrially encoded tRNA tyrosine /// mitochondrially encoded tRNA tyrosine	5821.77	1322.95	2.13758	2.70817e-12	2.1377	0	5826	5891						1	0
ENSG00000228253	MT-ATP8	mitochondrially encoded ATP synthase membrane subunit 8 /// mitochondrially encoded tRNA lysine #or# mitochondrially encoded ATP synthase membrane subunit 8	9212.9	2094.69	2.13682	8.89276e-13	2.13691	0	8366	8572						1	0
ENSG00000269028	MTRNR2L12	MT-RNR2 like 12	1009.29	230.397	2.13043	5.18336e-15	2.13115	3	96617188	96618236							1
ENSG00000254585	MAGEL2	MAGE family member L2	3.72912	0.853656	2.21131	0.046649	2.12711	15	23643544	23647841							1
ENSG00000198763	MT-ND2	mitochondrially encoded NADH:ubiquinone oxidoreductase core subunit 2 #or# mitochondrially encoded tRNA tryptophan /// mitochondrially encoded NADH:ubiquinone oxidoreductase core subunit 2	47895	10966.6	2.12674	9.47868e-13	2.12676	0	4470	5511						1	0
ENSG00000269220	LINC00528	long intergenic non-protein coding RNA 528	4.54635	1.04284	2.13994	0.0214031	2.12419	22	17777322	17779481			1				0
ENSG00000198899	MT-ATP6	mitochondrially encoded ATP synthase membrane subunit 6 #or# mitochondrially encoded ATP synthase membrane subunit 8 /// mitochondrially encoded ATP synthase membrane subunit 6 /// mitochondrially encoded ATP synthase membrane subunit 6 #or# mitochondrially encoded cytochrome c oxidase III	36534.3	8386.98	2.123	3.03048e-13	2.12303	0	8527	9207						1	0
ENSG00000198886	MT-ND4	mitochondrially encoded NADH:ubiquinone oxidoreductase core subunit 4 #or# mitochondrially encoded NADH:ubiquinone oxidoreductase core subunit 4L /// mitochondrially encoded NADH:ubiquinone oxidoreductase core subunit 4 #or# mitochondrially encoded tRNA histidine /// mitochondrially encoded NADH:ubiquinone oxidoreductase core subunit 4	85202	19597	2.12024	5.19909e-13	2.12025	0	10760	12137						1	0
ENSG00000162039	MEIOB	meiosis specific with OB domains #or# long intergenic non-protein coding RNA 254 /// meiosis specific with OB domains	4.78093	1.1027	2.16974	0.0278782	2.11625	16	1833987	1884294							1
ENSG00000210191	MT-TL2	mitochondrially encoded tRNA histidine #or# mitochondrially encoded tRNA serine 2 (AGU/C) #or# mitochondrially encoded tRNA leucine 2 (CUN) /// mitochondrially encoded NADH:ubiquinone oxidoreductase core subunit 5 #or# mitochondrially encoded tRNA leucine 2 (CUN) /// mitochondrially encoded tRNA serine 2 (AGU/C) #or# mitochondrially encoded tRNA leucine 2 (CUN) /// mitochondrially encoded tRNA le…	7072.62	1633.49	2.11416	9.53254e-13	2.11428	0	12266	12336						1	0
ENSG00000198938	MT-CO3	mitochondrially encoded cytochrome c oxidase III	38306.5	8856.48	2.11276	1.41699e-12	2.11278	0	9207	9990						1	0
ENSG00000209082	MT-TL1	mitochondrially encoded tRNA leucine 1 (UUA/G) #or# mitochondrially encoded 16S RNA /// mitochondrially encoded tRNA leucine 1 (UUA/G)	4754.12	1100.91	2.11025	2.84556e-12	2.11048	0	3230	3304						1	0
ENSG00000210135	MT-TN	mitochondrially encoded tRNA asparagine #or# mitochondrially encoded tRNA cysteine /// mitochondrially encoded tRNA alanine #or# mitochondrially encoded tRNA asparagine /// mitochondrially encoded tRNA asparagine	4411.36	1022.85	2.10839	1.18396e-11	2.10863	0	5657	5729						1	0
ENSG00000173811	CCDC13-AS1	CCDC13 antisense RNA 1	6.77785	1.57204	2.01869	0.0144998	2.10819	3	42732575	42746768							1
ENSG00000220008	LINGO3	leucine rich repeat and Ig domain containing 3	5.88352	1.3673	1.95723	0.0384486	2.10535	19	2289784	2292024							1
ENSG00000144460	NYAP2	neuronal tyrosine-phosphorylated phosphoinositide-3-kinase adaptor 2	4.19556	0.982985	2.11478	0.0309283	2.09362	2	225399710	225654018							1
ENSG00000248527	MTATP6P1	mitochondrially encoded ATP synthase 6 pseudogene 1 /// mitochondrially encoded ATP synthase 8 pseudogene 1 #or# mitochondrially encoded ATP synthase 6 pseudogene 1	10826.7	2545.2	2.08865	1.68126e-13	2.08874	1	633696	634376	1						0
ENSG00000239039	SNORD13	small nucleolar RNA, C/D box 13	8.90834	2.10124	2.09935	0.00136473	2.08392	8	33513475	33513578					1		0
ENSG00000198744	MTCO3P12	mitochondrially encoded cytochrome c oxidase III pseudogene 12 /// mitochondrially encoded cytochrome c oxidase III pseudogene 12 #or# mitochondrially encoded ATP synthase 6 pseudogene 1	5910.89	1396.19	2.08173	4.38582e-13	2.08188	1	634376	634922	1						0
ENSG00000225972	MTND1P23	mitochondrially encoded NADH:ubiquinone oxidoreductase core subunit 1 pseudogene 23	6315.54	1492.61	2.08097	1.53792e-12	2.08107	1	629062	629433	1						0
ENSG00000187979	AC008079.1		4.15701	0.982985	2.04031	0.0430974	2.08031	22	18178038	18205915		1					0
ENSG00000270906	MTND4P35	mitochondrially encoded NADH:ubiquinone oxidoreductase core subunit 4L pseudogene 5 #or# mitochondrially encoded NADH:ubiquinone oxidoreductase core subunit 4 pseudogene 35 /// mitochondrially encoded NADH:ubiquinone oxidoreductase core subunit 4 pseudogene 35	149.16	35.72	2.05566	3.09567e-10	2.06205	5	100048988	100050362	1						0
ENSG00000210196	MT-TP	mitochondrially encoded tRNA proline	6138.48	1474.22	2.05777	1.48198e-11	2.05793	0	15956	16023						1	0
ENSG00000210195	MT-TT	mitochondrially encoded tRNA threonine	2809.73	675.066	2.05708	1.87698e-11	2.05733	0	15888	15953						1	0
ENSG00000210154	MT-TD	mitochondrially encoded tRNA aspartic acid /// mitochondrially encoded cytochrome c oxidase II #or# mitochondrially encoded tRNA aspartic acid	5549.47	1333.58	2.05688	1.59204e-11	2.05704	0	7518	7585						1	0
ENSG00000210049	MT-TF	mitochondrially encoded tRNA phenylalanine #or# mitochondrially encoded 12S RNA /// mitochondrially encoded tRNA phenylalanine	4372.83	1052.31	2.05483	1.98107e-13	2.05501	0	577	647						1	0
ENSG00000255823	MTRNR2L8	MT-RNR2 like 8	791.966	190.614	2.05253	4.45991e-17	2.05478	11	10507887	10509189							1
ENSG00000198727	MT-CYB	mitochondrially encoded cytochrome b /// mitochondrially encoded cytochrome b #or# mitochondrially encoded tRNA threonine	71487.6	17244.3	2.05156	3.17025e-12	2.05157	0	14747	15887						1	0
ENSG00000210156	MT-TK	mitochondrially encoded tRNA lysine	1482.61	362.672	2.03032	3.67469e-14	2.0314	0	8295	8364						1	0
ENSG00000267012	LINC01837	long intergenic non-protein coding RNA 1837 /// NA #or# long intergenic non-protein coding RNA 1837	3.57164	0.875809	2.28701	0.0444118	2.0279	19	31886704	31908284			1				0
ENSG00000230612	AC004039.1		4.15701	1.02069	2.03159	0.0359629	2.026	5	132688681	132723725		1					0
ENSG00000285090	AC002074.1		5.16131	1.26974	1.92174	0.0350976	2.02321	7	94278680	94395608		1					0
ENSG00000224382	LINC00703	long intergenic non-protein coding RNA 703	7.03931	1.73908	1.95146	0.00923091	2.01711	10	4384246	4410612			1				0
ENSG00000249618	LINC02465	long intergenic non-protein coding RNA 2465	6.19248	1.53434	1.96028	0.0171996	2.0129	4	129771659	129955368			1				0
ENSG00000198804	MT-CO1	mitochondrially encoded cytochrome c oxidase I	79135.1	19711.9	2.00524	2.30776e-12	2.00525	0	5904	7445						1	0
ENSG00000237973	MTCO1P12	mitochondrially encoded cytochrome c oxidase I pseudogene 12	20062	5016.72	1.9996	7.08343e-12	1.99965	1	631074	632616	1						0
ENSG00000278791	MIR6723	microRNA 6723	503.254	127.017	1.98272	1.43937e-14	1.98627	1	632325	632413				1			0
ENSG00000198888	MT-ND1	mitochondrially encoded NADH:ubiquinone oxidoreductase core subunit 1 #or# mitochondrially encoded tRNA isoleucine /// mitochondrially encoded NADH:ubiquinone oxidoreductase core subunit 1 #or# mitochondrially encoded tRNA leucine 1 (UUA/G) /// mitochondrially encoded NADH:ubiquinone oxidoreductase core subunit 1	51143.1	13002	1.97579	4.09878e-12	1.97581	0	3307	4262						1	0
ENSG00000230021	AL669831.3		1656.03	421.228	1.97447	1.41789e-14	1.97505	1	586071	827796		1					0
ENSG00000210082	MT-RNR2	mitochondrially encoded 16S RNA	89034.2	22682.8	1.97275	3.33129e-11	1.97276	0	1671	3229						1	0
ENSG00000173511	VEGFB	vascular endothelial growth factor B	7.42865	1.8965	1.99308	0.00847272	1.96976	11	64234538	64238793							1
ENSG00000226516	FAM138B	family with sequence similarity 138 member B	3.99057	1.02069	2.07544	0.0314917	1.96705	2	113577382	113578852							1
ENSG00000231824	AKAIN1	A-kinase anchor inhibitor 1	4.57594	1.17811	2.10673	0.0334297	1.95759	18	5145285	5197503							1
ENSG00000211459	MT-RNR1	mitochondrially encoded 12S RNA	44243.3	11413	1.95475	2.41788e-11	1.95477	0	648	1601						1	0
ENSG00000210127	MT-TA	mitochondrially encoded tRNA alanine	2806.11	726.536	1.94914	2.24898e-11	1.94947	0	5587	5655						1	0
ENSG00000212907	MT-ND4L	mitochondrially encoded NADH:ubiquinone oxidoreductase core subunit 4L /// mitochondrially encoded tRNA arginine #or# mitochondrially encoded NADH:ubiquinone oxidoreductase core subunit 4L	19649.2	5149.97	1.93179	2.99681e-11	1.93183	0	10470	10766						1	0
ENSG00000251170	AC004052.1		5.9875	1.57204	1.92786	0.0153807	1.92931	4	104230380	104411035		1					0
ENSG00000151790	TDO2	tryptophan 2,3-dioxygenase	9.11333	2.4257	1.93832	0.00208537	1.90958	4	155854738	155920406							1
ENSG00000258537	FRMD6-AS2	FRMD6 antisense RNA 2	10.1562	2.71245	1.91496	0.00252643	1.90469	14	51454512	51599952							1
ENSG00000140285	FGF7	fibroblast growth factor 7	6.18352	1.66961	1.89318	0.0248038	1.88892	15	49423096	49488775							1
ENSG00000233607	LINC01392	long intergenic non-protein coding RNA 1392	5.76459	1.59419	1.81146	0.0302444	1.85439	7	115061537	115231355			1				0
ENSG00000183837	PNMA3	PNMA family member 3	4.78093	1.323	1.85353	0.0285681	1.85348	0	153056409	153060467							1
ENSG00000108774	AC099811.2	lysine acetyltransferase 2A #or# NA /// RAB5C, member RAS oncogene family #or# NA	9.91264	2.75016	1.86061	0.00451363	1.84976	17	42124976	42155044							1
ENSG00000210077	MT-TV	mitochondrially encoded tRNA valine #or# mitochondrially encoded 16S RNA /// mitochondrially encoded tRNA valine /// mitochondrially encoded tRNA valine #or# mitochondrially encoded 12S RNA	6949.21	1943.4	1.83815	9.72302e-11	1.83827	0	1602	1670						1	0
ENSG00000248923	MTND5P11	mitochondrially encoded NADH:ubiquinone oxidoreductase core subunit 5 pseudogene 11	465.617	130.214	1.83816	1.7464e-08	1.83826	5	134924648	134926459	1						0
ENSG00000202337	RNU6-8	RNA, U6 small nuclear 8	6.34996	1.78338	1.6918	0.0433618	1.83213	14	32203163	32203269							1
ENSG00000214894	LINC00243	long intergenic non-protein coding RNA 243	7.00075	1.98812	1.71877	0.0217308	1.8161	6	30798654	30830659			1				0
ENSG00000102043	MTMR8	myotubularin related protein 8	7.53534	2.18325	1.89941	0.00680748	1.78719	0	64268081	64395431							1
ENSG00000167780	SOAT2	sterol O-acyltransferase 2	4.97424	1.45892	1.74186	0.0378389	1.76957	12	53103518	53124538							1
ENSG00000165066	NKX6-3	NK6 homeobox 3	5.97854	1.76123	1.67722	0.0347406	1.76321	8	41645178	41650669							1
ENSG00000197223	C1D	C1D nuclear receptor corepressor	15.9354	4.73234	1.78903	0.00018538	1.75161	2	68041130	68110948							1
ENSG00000229981	LINC01435	long intergenic non-protein coding RNA 1435	6.71811	2.00367	1.74627	0.024481	1.74541	10	107694973	108197849			1				0
ENSG00000240021	TEX35	testis expressed 35	10.7622	3.2638	1.67923	0.00697911	1.72135	1	178513077	178548602							1
ENSG00000272230	MIR3666	microRNA 3666	9.57977	2.92973	1.88065	0.0026548	1.70922	7	114653345	114653455				1			0
ENSG00000090376	IRAK3	interleukin 1 receptor associated kinase 3 #or# microRNA 6502 /// interleukin 1 receptor associated kinase 3	9.45787	2.90164	1.57053	0.0154626	1.70465	12	66188879	66254622							1
ENSG00000236445	LINC00608	long intergenic non-protein coding RNA 608	6.64101	2.10124	1.63901	0.0363574	1.66016	2	218975393	218989940			1				0
ENSG00000120738	EGR1	early growth response 1	31.0395	9.84466	1.69585	1.03666e-06	1.65669	5	138465490	138469315							1
ENSG00000265179	AP000894.2		7.44928	2.38799	1.61183	0.0181148	1.6413	18	902766	906667		1					0
ENSG00000230943	LINC02541	long intergenic non-protein coding RNA 2541	7.4672	2.41015	1.6776	0.0182868	1.63145	6	113623535	113650074			1				0
ENSG00000259921	AC022819.1		6.95324	2.25272	1.44247	0.0385963	1.62602	15	99157231	99161140		1					0
ENSG00000128606	LRRC17	leucine rich repeat containing 17	8.52228	2.77231	1.49542	0.0326185	1.62015	7	102912991	102944949							1
ENSG00000215869	AC092506.1		5.61608	1.83664	1.71054	0.0274423	1.61249	1	104072983	104226678		1					0
ENSG00000185985	SLITRK2	SLIT and NTRK like family member 2	12.1917	3.99774	1.57543	0.00382026	1.60864	0	145817832	145829856							1
ENSG00000180964	TCEAL8	transcription elongation factor A like 8	10.9142	3.58826	1.63955	0.0042985	1.60485	0	103252995	103255203							1
ENSG00000112303	VNN2	vanin 2	5.97854	1.99406	1.63318	0.0366736	1.58408	6	132743870	132763459							1
ENSG00000234336	JAZF1-AS1	JAZF1 antisense RNA 1	5.85961	1.96597	1.61531	0.0321368	1.57556	7	28180322	28243917							1
ENSG00000262223	AC110285.1		8.15086	2.74421	1.40148	0.0432693	1.57056	17	81376001	81385360		1					0
ENSG00000122986	HVCN1	hydrogen voltage gated channel 1	6.61141	2.23057	1.47718	0.0440287	1.56755	12	110627841	110704950							1
ENSG00000147206	NXF3	nuclear RNA export factor 3	8.68544	2.93934	1.55584	0.0105447	1.56311	0	103075810	103093125							1
ENSG00000176302	FOXR1	forkhead box R1	7.23533	2.47	1.54469	0.0235026	1.55055	11	118971707	118981291							1
ENSG00000251340	MTCYBP35	mitochondrially encoded cytochrome b pseudogene 35	10.3612	3.53801	1.47657	0.015798	1.55018	5	94569540	94570676	1						0
ENSG00000198574	SH2D1B	SH2 domain containing 1B	8.82228	3.01475	1.51602	0.0193658	1.54911	1	162395266	162412138							1
ENSG00000143257	NR1I3	nuclear receptor subfamily 1 group I member 3	8.72399	3.00881	1.49189	0.0158834	1.53579	1	161229666	161238302							1
ENSG00000244921	MTCYBP18	mitochondrially encoded cytochrome b pseudogene 18	45.5384	15.727	1.52165	0.000700817	1.53384	5	134923303	134924049	1						0
ENSG00000203985	LDLRAD1	low density lipoprotein receptor class A domain containing 1	5.76459	1.99406	1.56105	0.0410684	1.53151	1	54007299	54018186							1
ENSG00000168594	ADAM29	ADAM metallopeptidase domain 29	9.14564	3.16624	1.46997	0.0236379	1.53031	4	174829668	174978180							1
ENSG00000049246	PER3	period circadian regulator 3	8.37647	2.90164	1.35428	0.0373047	1.52948	1	7784320	7845177							1
ENSG00000167612	ANKRD33	ankyrin repeat domain 33	6.17185	2.18325	1.55399	0.0369596	1.49922	12	51887960	51891664							1
ENSG00000127954	STEAP4	STEAP4 metalloreductase	12.0195	4.26234	1.33173	0.0201435	1.49566	7	88270892	88306891							1
ENSG00000188641	MIR137HG	dihydropyrimidine dehydrogenase #or# MIR137 host gene /// MIR137 host gene /// MIR137 host gene #or# microRNA 137 /// MIR137 host gene #or# microRNA 2682	11.675	4.14922	1.39324	0.00710439	1.49251	1	97077743	97995000				1			0
ENSG00000168959	GRM5	glutamate metabotropic receptor 5	9.27081	3.29556	1.36757	0.0192485	1.49217	11	88504576	89065945							1
ENSG00000171509	RXFP1	relaxin family peptide receptor 1	10.0791	3.63558	1.37702	0.0204737	1.47111	4	158315311	158653372							1
ENSG00000185304	RGPD2	RANBP2-like and GRIP domain containing 2	8.80436	3.17585	1.26903	0.049962	1.47108	2	87755955	87825952							1
ENSG00000275175	AC106028.5		7.82966	2.84178	1.35753	0.0344984	1.46216	15	92819598	92819992		1					0
ENSG00000250822	LINC02111	long intergenic non-protein coding RNA 2111	33.58	12.2052	1.45882	2.2597e-06	1.4601	5	17378906	17387310			1				0
ENSG00000248734	AC008906.1		8.72399	3.18839	1.47401	0.0169125	1.45216	5	96784777	96785999		1					0
ENSG00000125648	SLC25A23	solute carrier family 25 member 23	17.047	6.33247	1.47451	0.000635329	1.42867	19	6436079	6465203							1
ENSG00000144285	SCN1A	sodium voltage-gated channel alpha subunit 1	19.3556	7.21195	1.39398	0.000936539	1.42429	2	165984641	166149214							1
ENSG00000119401	TRIM32	tripartite motif containing 32	12.786	4.83584	1.35936	0.00692863	1.40272	9	116687302	116701300							1
ENSG00000149972	CNTN5	contactin 5	11.3063	4.28449	1.32498	0.0143231	1.39993	11	99020953	100358885							1
ENSG00000125046	SSUH2	ssu-2 homolog (C. elegans)	9.43724	3.60381	1.31561	0.0272779	1.38884	3	8619400	8745040							1
ENSG00000114204	WDR49	WD repeat domain 49 /// serpin family I member 2 #or# WD repeat domain 49	11.1694	4.26894	1.3557	0.0128984	1.38761	3	167441789	167479004							1
ENSG00000280850	AL121956.4		8.40279	3.2261	1.46025	0.0199533	1.38108	6	166275462	166277077		1					0
ENSG00000159479	MED8	mediator complex subunit 8	9.70766	3.7272	1.30589	0.0363011	1.38103	1	43383917	43389808							1
ENSG00000253553	AC090568.2		13.181	5.0945	1.42421	0.00325732	1.37145	8	88326836	88737134		1					0
ENSG00000185296	AC026785.1		7.4672	2.90164	1.40314	0.0242024	1.3637	5	17306381	17306960		1					0
ENSG00000172247	C1QTNF4	C1q and TNF related 4	6.63205	2.58312	1.3921	0.0467634	1.36034	11	47589664	47594659							1
ENSG00000234229	LINC01505	long intergenic non-protein coding RNA 1505 /// long intergenic non-protein coding RNA 1505 #or# long intergenic non-protein coding RNA 1505	8.63793	3.40868	1.23653	0.0345737	1.34147	9	106664754	106702662			1				0
ENSG00000230392	AC004835.1		6.26063	2.50771	1.42678	0.029528	1.31994	0	119291529	119335610		1					0
ENSG00000197576	HOXA4	homeobox A4	12.8748	5.19206	1.24934	0.0161325	1.31016	7	27128507	27130799							1
ENSG00000072201	LNX1	ligand of numb-protein X 1	6.82536	2.77231	1.34809	0.0434158	1.29982	4	53459301	53701405							1
ENSG00000144619	CNTN4	contactin 4	12.6877	5.18245	1.32803	0.00783046	1.29172	3	2098813	3057956							1
ENSG00000227674	LINC00355	long intergenic non-protein coding RNA 355	7.02139	2.86987	1.31129	0.0433473	1.29077	13	63986371	64076011			1				0
ENSG00000205890	AC108134.1		9.98078	4.07975	1.31946	0.0237168	1.29067	16	3032481	3039133		1					0
ENSG00000137185	ZSCAN9	zinc finger and SCAN domain containing 9	18.9728	7.75963	1.1677	0.0103536	1.28987	6	28224886	28233482							1
ENSG00000177613	CSTF2T	cleavage stimulation factor subunit 2 tau variant	24.1577	9.94289	1.27259	0.00048629	1.28075	10	51695487	51699591							1
ENSG00000189367	KIAA0408	KIAA0408 #or# NA /// KIAA0408	13.3776	5.52613	1.20823	0.0182321	1.27548	6	127440343	127459391							1
ENSG00000234474	MIR3663HG	MIR3663 host gene	7.25325	2.9992	1.33119	0.0424603	1.27405	10	117158656	117169059				1			0
ENSG00000255435	AP001267.3		21.0023	8.78032	1.23395	0.00160475	1.2582	11	118511911	118531094		1					0
ENSG00000169427	KCNK9	potassium two pore domain channel subfamily K member 9	12.0252	5.03464	1.20067	0.01919	1.2561	8	139600838	139703056							1
ENSG00000134363	FST	follistatin	11.9481	5.02503	1.19631	0.0203626	1.24958	5	53480409	53487134							1
ENSG00000132357	CARD6	caspase recruitment domain family member 6	12.7564	5.37164	1.20327	0.0150744	1.24778	5	40841184	40860175							1
ENSG00000196415	PRTN3	proteinase 3	11.1219	4.70057	1.14683	0.0405566	1.2425	19	840960	848175							1
ENSG00000232624	LINC01517	long intergenic non-protein coding RNA 1517	9.50267	4.03016	1.12585	0.0490403	1.2375	10	28743506	28941910			1				0
ENSG00000228800	AL590068.1		9.40438	4.01989	1.31789	0.0183069	1.22618	10	30553854	30554483		1					0
ENSG00000149295	DRD2	dopamine receptor D2	12.6608	5.41896	1.14486	0.0236773	1.22428	11	113409615	113475691							1
ENSG00000156970	BUB1B	BUB1 mitotic checkpoint serine/threonine kinase B	15.1098	6.46774	1.26448	0.00663921	1.22415	15	40161023	40221136							1
ENSG00000131475	VPS25	vacuolar protein sorting 25 homolog	16.8094	7.28964	1.15106	0.0100654	1.20535	17	42773436	42779599							1
ENSG00000120708	TGFBI	transforming growth factor beta induced	6.48353	2.81963	1.26211	0.0486987	1.20128	5	136028895	136063818							1
ENSG00000175544	CABP4	calcium binding protein 4	8.75358	3.85286	1.24401	0.0377559	1.18394	11	67452406	67460313							1
ENSG00000118972	FGF23	fibroblast growth factor 23	8.74462	3.85286	1.21448	0.047464	1.18247	12	4368227	4379728							1
ENSG00000236668	AC006450.3		14.5958	6.43965	1.10469	0.0140895	1.1805	9	124006277	124009396		1					0
ENSG00000148143	ZNF462	zinc finger protein 462	13.9334	6.17505	1.09317	0.0227955	1.17402	9	106863097	107013634							1
ENSG00000177238	TRIM72	tripartite motif containing 72	22.9099	10.2866	1.11867	0.00317496	1.15521	16	31214021	31231537							1
ENSG00000162692	VCAM1	vascular cell adhesion molecule 1	12.9228	5.80922	1.09843	0.0216975	1.15351	1	100719742	100739045							1
ENSG00000240184	PCDHGC3	protocadherin gamma subfamily C, 3	13.6597	6.14329	1.17798	0.0107677	1.15284	5	141475947	141512979							1
ENSG00000169251	NMD3	NMD3 ribosome export adaptor	44.5092	20.0773	1.11895	2.17051e-05	1.14854	3	161104696	161253532							1
ENSG00000273338	AC103591.3		14.6042	6.61923	1.19526	0.00547165	1.14165	1	78004346	78004554		1					0
ENSG00000179241	LDLRAD3	low density lipoprotein receptor class A domain containing 3	13.9657	6.36057	1.08083	0.0299461	1.13466	11	35943981	36232136							1
ENSG00000168314	MOBP	myelin-associated oligodendrocyte basic protein	10.6137	4.8957	1.15125	0.0249147	1.11633	3	39467198	39529479							1
ENSG00000198821	CD247	CD247 molecule	10.3405	4.77598	1.105	0.0337935	1.11444	1	167430640	167518610							1
ENSG00000173208	ABCD2	ATP binding cassette subfamily D member 2	12.9999	6.05533	1.01421	0.044696	1.10223	12	39550033	39619751							1
ENSG00000155846	PPARGC1B	PPARG coactivator 1 beta	35.1786	16.4077	1.08125	0.000322474	1.10033	5	149730298	149855022							1
ENSG00000251298	AC093835.1		11.1963	5.25192	1.11091	0.030913	1.09211	4	147609552	147617245		1					0
ENSG00000176641	RNF152	ring finger protein 152	15.2577	7.15803	1.0921	0.0114899	1.09191	18	61808063	61894247							1
ENSG00000149243	KLHL35	kelch like family member 35	24.841	11.7293	1.16999	0.000716904	1.08261	11	75422394	75430629							1
ENSG00000198822	GRM3	glutamate metabotropic receptor 3	18.6662	8.82764	1.05157	0.00682956	1.08033	7	86643914	86864884							1
ENSG00000204740	MALRD1	MAM and LDL receptor class A domain containing 1	13.5318	6.43664	1.15695	0.0112273	1.07197	10	19048771	19790401							1
ENSG00000135697	BCO1	beta-carotene oxygenase 1	11.88	5.65179	1.0031	0.0423969	1.07175	16	81238448	81291142							1
ENSG00000157181	ODR4	odr-4 GPCR localization factor homolog	20.4967	9.76925	1.0799	0.00481983	1.06907	1	186375838	186421378							1
ENSG00000177406	AC021054.1		12.6079	6.01396	1.11321	0.0245955	1.06794	12	630891	663706		1					0
ENSG00000133124	IRS4	insulin receptor substrate 4 #or# NA /// insulin receptor substrate 4	47.8902	22.9125	1.02771	8.2973e-05	1.0636	0	108732482	108736409							1
ENSG00000147669	POLR2K	RNA polymerase II subunit K	14.1473	6.78626	1.00383	0.0362444	1.05984	8	100150584	100154002							1
ENSG00000225913	AL138767.3		17.944	8.61329	1.12008	0.00601851	1.05887	10	87607985	87659279		1					0
ENSG00000260971	AC119674.1		11.8884	5.75897	1.06775	0.036993	1.04567	1	56154545	56477687		1					0
ENSG00000118156	ZNF541	zinc finger protein 541	9.38646	4.57124	1.08026	0.0468754	1.03799	19	47520685	47555856							1
ENSG00000280331	AC061999.1		11.0717	5.43744	1.02935	0.0455778	1.02588	11	36510361	36510537		1					0
ENSG00000158220	ESYT3	extended synaptotagmin 3	18.4819	9.12693	1.02314	0.0145541	1.01791	3	138434586	138481686							1
ENSG00000160124	CCDC58	coiled-coil domain containing 58	12.2777	6.08343	1.03961	0.0318927	1.01309	3	122359591	122383231							1
ENSG00000167080	B4GALNT2	beta-1,4-N-acetyl-galactosaminyltransferase 2	10.0758	5.00288	1.10102	0.0439016	1.01007	17	49132460	49176840							1
ENSG00000235172	LINC01366	long intergenic non-protein coding RNA 1366	9.96015	4.94896	1.06788	0.0481355	1.00904	5	170331429	170333879			1				0
ENSG00000280330	CU634019.7		13.0949	6.54381	1.02696	0.0270627	1.00081	21	7129103	7130287		1					0
ENSG00000177994	C2orf73	chromosome 2 open reading frame 73	15.8974	7.94882	1.02995	0.0172907	0.99998	2	54330034	54383742							1
ENSG00000172803	SNX32	sorting nexin 32	36.2187	18.3597	1.0168	0.000912411	0.980192	11	65833641	65856896							1
ENSG00000214842	RAD51AP2	RAD51 associated protein 2	12.266	6.23491	1.0231	0.0315461	0.97623	2	17510584	17518439							1
ENSG00000135945	REV1	REV1, DNA directed polymerase	19.9293	10.1476	1.0193	0.00618696	0.973746	2	99400475	99490035							1
ENSG00000150551	LYPD1	LY6/PLAUR domain containing 1	13.882	7.14842	1.07467	0.0151189	0.957521	2	132644853	132671579							1
ENSG00000168542	COL3A1	collagen type III alpha 1 chain	9.76413	5.10044	1.01852	0.0497295	0.936869	2	188974320	189012746							1
ENSG00000080166	DCT	dopachrome tautomerase	16.7231	8.96951	1.00609	0.0133852	0.898737	13	94436808	94479682							1
ENSG00000233057	EEF1A1P14	eukaryotic translation elongation factor 1 alpha 1 pseudogene 14	2.24942	0	3.86714	0.0270653	?	1	194188967	194190342	1						0
ENSG00000253515	AC018682.2		3.08728	0	4.28316	0.00236152	?	2	46499731	46501278		1					0
ENSG00000279512	AC011755.1		2.41585	0	3.86609	0.0297316	?	2	133117004	133119052		1					0
ENSG00000230067	HSPD1P6	heat shock protein family D (Hsp60) member 1 pseudogene 6	2.83479	0	4.10392	0.0136097	?	3	36767117	36784167	1						0
ENSG00000260743	AC007823.1		2.84375	0	4.19486	0.0252533	?	3	179340322	179341887		1					0
ENSG00000169245	CXCL10	C-X-C motif chemokine ligand 10	2.42481	0	3.90468	0.0159922	?	4	76021117	76023497							1
ENSG00000232398	TMPRSS11CP	transmembrane serine protease 11C, pseudogene	3.21517	0	4.32002	0.023009	?	4	67766480	67773854	1						0
ENSG00000171560	FGA	fibrinogen alpha chain	3.08728	0	4.30061	0.00335842	?	4	154583126	154590766							1
ENSG00000251059	AC139722.1		2.20191	0	3.67636	0.0429879	?	4	81164940	81193395		1					0
ENSG00000241411	AC104619.1		2.24046	0	3.80312	0.0352658	?	4	134952259	134952889		1					0
ENSG00000250332	AC010460.3		2.83479	0	4.05064	0.00860704	?	5	23303565	23305143		1					0
ENSG00000279726	AC005609.5		2.66835	0	4.10395	0.00945465	?	5	140788457	140822193		1					0
ENSG00000223623	AL133268.2		2.07402	0	3.8053	0.0267932	?	6	25053627	25057073		1					0
ENSG00000254136	AC064807.3		2.31756	0	3.99898	0.0400567	?	8	51996210	52008355		1					0
ENSG00000235705	AL133481.2		2.07402	0	3.80483	0.0201167	?	10	79507597	79510922		1					0
ENSG00000170276	HSPB2	heat shock protein family B (small) member 2 /// heat shock protein family B (small) member 2 #or# HSPB2-C11orf52 readthrough (NMD candidate)	2.65939	0	4.09453	0.0338602	?	11	111912242	111914093							1
ENSG00000214215	C12orf74	chromosome 12 open reading frame 74	2.50192	0	4.12658	0.011342	?	12	92702843	92708549							1
ENSG00000229521	MYCBP2-AS2	MYCBP2 antisense RNA 2	2.06507	0	3.71633	0.0290524	?	13	77080511	77081190							1
ENSG00000229665	PRR20C	proline rich 20C	2.28797	0	3.98128	0.0110211	?	13	57140918	57157082							1
ENSG00000258611	AC087641.1	NA /// repulsive guidance molecule BMP co-receptor a #or# NA	2.21087	0	3.70485	0.0226909	?	15	93065586	93066606							1
ENSG00000279887	AC046158.4		3.47662	0	4.479	0.00353194	?	16	78525189	78526535		1					0
ENSG00000280091	AC020895.2		2.84375	0	4.17759	0.0159098	?	19	6894994	6896832		1					0
ENSG00000273188	AL022328.3		2.49296	0	4.05714	0.00811643	?	22	50191724	50192402		1					0
ENSG00000224292	AF196972.1		2.8823	0	4.24855	0.00720488	?	0	48506523	48508838		1					0
ENSG00000253944	AC027117.2		7.11072	12.5201	-1.07512	0.0383507	-0.816174	8	17801345	17861069		1					0
ENSG00000264462	MIR3648-2	microRNA 3648-2	7.52965	14.2879	-1.16092	0.0263344	-0.924138	21	8986999	8987178				1			0
ENSG00000172006	ZNF554	zinc finger protein 554	8.39439	15.945	-1.05871	0.0157752	-0.925602	19	2819874	2835773							1
ENSG00000184343	SRPK3	SRSF protein kinase 3	12.2123	23.6345	-1.02329	0.00330748	-0.952559	0	153776412	153785732							1
ENSG00000015171	ZMYND11	zinc finger MYND-type containing 11	11.4342	22.3677	-1.12043	0.00479537	-0.968063	10	134465	254637							1
ENSG00000227733	AC239809.3		8.68544	17.132	-1.00189	0.0173772	-0.980025	1	148159213	148255012		1					0
ENSG00000133256	PDE6B	phosphodiesterase 6B	7.16719	14.586	-1.14104	0.013576	-1.0251	4	625584	670782							1
ENSG00000182318	ZSCAN22	zinc finger and SCAN domain containing 22	9.54122	19.4231	-1.00286	0.00990603	-1.02553	19	58327019	58342332							1
ENSG00000155903	RASA2	RAS p21 protein activator 2	7.72241	15.7299	-1.01953	0.0307417	-1.02639	3	141487047	141615342							1
ENSG00000170779	CDCA4	cell division cycle associated 4	9.51434	19.4201	-1.10061	0.00723478	-1.02937	14	105009573	105021148							1
ENSG00000198182	ZNF607	zinc finger protein 607 #or# NA /// zinc finger protein 607	10.8757	22.2606	-1.06239	0.00413656	-1.03338	19	37696363	37719790							1
ENSG00000223390	AL445685.1		5.55961	11.3827	-1.07559	0.043129	-1.03378	1	52033391	52044279		1					0
ENSG00000169692	AGPAT2	1-acylglycerol-3-phosphate O-acyltransferase 2	6.82536	14.0478	-1.04092	0.028077	-1.04137	9	136673143	136687423							1
ENSG00000135049	AGTPBP1	ATP/GTP binding protein 1	9.88576	20.406	-1.17828	0.00409709	-1.04557	9	85546539	85742029							1
ENSG00000111012	CYP27B1	cytochrome P450 family 27 subfamily B member 1	8.23692	17.22	-1.06151	0.00931976	-1.06391	12	57762334	57768986							1
ENSG00000279792	AC015909.5		5.42276	11.3612	-1.02625	0.0484963	-1.06701	17	50362967	50365232		1					0
ENSG00000060069	CTDP1	CTD phosphatase subunit 1	9.95119	20.8754	-1.09167	0.00492218	-1.06886	18	79679801	79756623							1
ENSG00000164687	FABP5	fatty acid binding protein 5	4.75134	10.0124	-1.0744	0.0444602	-1.07538	8	81280363	81284777							1
ENSG00000100288	CHKB	choline kinase beta	8.0436	17.2044	-1.15402	0.010532	-1.09687	22	50578949	50601455							1
ENSG00000147202	DIAPH2	diaphanous related formin 2	13.2407	28.474	-1.07631	0.000895548	-1.10466	0	96684663	97604997							1
ENSG00000243811	APOBEC3D	apolipoprotein B mRNA editing enzyme catalytic subunit 3D #or# NA /// apolipoprotein B mRNA editing enzyme catalytic subunit 3D	5.55961	12.0412	-1.16492	0.0245981	-1.11492	22	39021113	39033276							1
ENSG00000130005	GAMT	guanidinoacetate N-methyltransferase	5.45235	11.9119	-1.06591	0.0355931	-1.12745	19	1397026	1401570							1
ENSG00000280614	FP236383.2		217.371	475.094	-1.11762	2.5287e-13	-1.12805	21	8393419	8394341		1					0
ENSG00000130881	LRP3	LDL receptor related protein 3 /// LDL receptor related protein 3 #or# NA	8.48941	18.5585	-1.07493	0.0108569	-1.12835	19	33177603	33208867							1
ENSG00000129455	KLK8	kallikrein related peptidase 8 #or# NA /// kallikrein related peptidase 8	7.19678	15.7462	-1.23532	0.00717254	-1.12958	19	50996007	51002711							1
ENSG00000184619	KRBA2	KRAB-A domain containing 2	9.35687	20.5066	-1.09977	0.00743039	-1.13199	17	8368637	8376711							1
ENSG00000280800	FP671120.3		209.158	459.091	-1.11502	3.71742e-14	-1.13419	21	8210384	8211306		1					0
ENSG00000229821	AC103925.1		5.60712	12.3213	-1.01041	0.041546	-1.13582	1	201222113	201223123		1					0
ENSG00000171867	PRNP	prion protein	12.0966	26.6158	-1.28829	0.000733105	-1.13768	20	4686236	4701590							1
ENSG00000281383	FP671120.4		174.164	385.833	-1.14056	5.71872e-11	-1.14753	21	8254592	8255514		1					0
ENSG00000274917	RNA5-8SN3	RNA, 5.8S ribosomal N3	32.9175	72.9927	-1.11381	8.78845e-07	-1.1489	2201	112025	112177							1
ENSG00000079385	CEACAM1	carcinoembryonic antigen related cell adhesion molecule 1	3.23309	7.17058	-1.35911	0.0424473	-1.14918	19	42507304	42561234							1
ENSG00000275215	RNA5-8SN1	RNA, 5.8S ribosomal N1	32.9827	73.4339	-1.21278	1.64546e-07	-1.15474	21	8395607	8395759							1
ENSG00000233849	AC022201.2		5.93103	13.2192	-1.27721	0.0202893	-1.15628	2	70301451	70302072		1					0
ENSG00000234745	HLA-B	major histocompatibility complex, class I, B #or# microRNA 6891 /// major histocompatibility complex, class I, B	6.48353	14.4513	-1.02542	0.0335759	-1.15634	6	31269491	31357188							1
ENSG00000234685	NUS1P2	NUS1 pseudogene 2	5.64567	12.659	-1.04091	0.0460991	-1.16495	13	22915651	22916523	1						0
ENSG00000239415	AP001469.3	NA /// minichromosome maintenance complex component 3 associated protein #or# NA	8.74191	19.6397	-1.07213	0.00847014	-1.16776	21	46251549	46254133							1
ENSG00000275692	MIR6724-4	microRNA 6724-4	9.42501	21.2398	-1.07826	0.0119357	-1.1722	21	8432530	8432621				1			0
ENSG00000102854	MSLN	mesothelin	3.97266	8.98506	-1.13414	0.0461678	-1.17743	16	760762	768865							1
ENSG00000253741	AC108002.1		7.41073	16.7949	-1.25027	0.00593875	-1.18034	8	142702252	142726973		1					0
ENSG00000261409	AL035425.3		15.475	35.0998	-1.27181	0.000177554	-1.18153	0	108719949	108724944		1					0
ENSG00000272115	AC233992.3		5.72604	13.0056	-1.31393	0.0154331	-1.18352	8	144409492	144409976		1					0
ENSG00000141753	IGFBP4	insulin like growth factor binding protein 4	3.92515	9.09517	-1.31891	0.038472	-1.21235	17	40443461	40457731							1
ENSG00000228350	LINC02585	long intergenic non-protein coding RNA 2585	7.64259	17.7174	-1.16939	0.0082201	-1.21303	3	48663776	48669174			1				0
ENSG00000167945	PRR25	proline rich 25	9.24121	21.647	-1.31049	0.0010408	-1.22801	16	805443	813861							1
ENSG00000232648	AC107214.1		13.1039	30.9986	-1.18181	0.000390026	-1.2422	4	183494938	183504494		1					0
ENSG00000176381	PRR18	proline rich 18	1.78298	4.24679	-1.95493	0.0449984	-1.25208	6	166305300	166308448							1
ENSG00000243977	AC125604.1		4.96528	11.9747	-1.2224	0.0276345	-1.27004	3	179649494	179650200		1					0
ENSG00000273730	RNA5-8SN2	RNA, 5.8S ribosomal N2	29.0928	70.7088	-1.24139	5.91142e-08	-1.28123	2201	155997	156149							1
ENSG00000269926	DDIT4-AS1	DDIT4 antisense RNA 1	3.90451	9.60588	-1.3656	0.0189027	-1.29878	10	72274915	72275980							1
ENSG00000203900	AL121827.1		3.33978	8.22897	-1.26479	0.0451914	-1.30096	20	63359988	63371177		1					0
ENSG00000214855	APOC1P1	apolipoprotein C1 pseudogene 1	3.99057	10.0117	-1.10928	0.0497	-1.32702	19	44926804	44931386	1						0
ENSG00000283283	AC013268.4		4.42118	11.2821	-1.3295	0.0181402	-1.35153	2	110022447	110050064		1					0
ENSG00000163817	SLC6A20	solute carrier family 6 member 20	2.84375	7.328	-1.55593	0.0280097	-1.36563	3	45755450	45796535							1
ENSG00000251369	ZNF550	zinc finger protein 550	3.76767	9.80101	-1.27532	0.0256484	-1.37926	19	57535257	57559863							1
ENSG00000089335	ZNF302	zinc finger protein 302	9.15188	24.0446	-1.3427	0.000439439	-1.39357	19	34677639	34686397							1
ENSG00000279175	AL033543.1		4.57594	12.107	-1.35511	0.00783451	-1.4037	22	44102779	44116232		1					0
ENSG00000283822	MIR639	microRNA 639 /// trans-2,3-enoyl-CoA reductase #or# microRNA 639	5.38421	14.3789	-1.39494	0.00455031	-1.41714	19	14529543	14529640				1			0
ENSG00000105695	MAG	myelin associated glycoprotein	4.14805	11.3294	-1.47892	0.00979381	-1.44957	19	35292125	35313804							1
ENSG00000256508	MRGPRF-AS1	MRGPRF antisense RNA 1	2.67731	7.328	-1.41874	0.0475326	-1.45264	11	69012283	69018447							1
ENSG00000225285	LINC01770	long intergenic non-protein coding RNA 1770	3.94306	10.8283	-1.41586	0.0169528	-1.45742	1	1430539	1434573			1				0
ENSG00000160183	TMPRSS3	transmembrane serine protease 3	3.14375	8.66061	-1.26451	0.0388503	-1.46198	21	42371837	42396846							1
ENSG00000267309	AC092295.2		7.01867	19.6086	-1.41233	0.000973561	-1.48222	19	36489649	36491040		1					0
ENSG00000121053	EPX	eosinophil peroxidase	3.66098	10.3177	-1.60761	0.0108653	-1.49482	17	58192737	58205174							1
ENSG00000274276	CBSL	cystathionine-beta-synthase like	5.33072	15.1194	-1.07926	0.0206278	-1.504	21	6444869	6468040							1
ENSG00000165730	STOX1	storkhead box 1	2.87334	8.19787	-1.7183	0.0145587	-1.51252	10	68827541	68895432							1
ENSG00000127249	AC048351.1	NA /// ATPase 13A4 #or# NA	3.39625	9.95844	-1.23196	0.0344837	-1.55198	3	193402077	193593111							1
ENSG00000248367	AC008610.1		1.88967	5.70571	-1.70371	0.0395421	-1.59427	5	180293245	180295253		1					0
ENSG00000230699	AL645608.3		4.16597	12.8667	-1.46394	0.00681991	-1.62692	1	911435	914948		1					0
ENSG00000275221	HIST1H2AK	histone cluster 1 H2A family member k	2.11258	6.82397	-1.54062	0.0357997	-1.69161	6	27837947	27838339							1
ENSG00000064201	TSPAN32	tetraspanin 32	3.1823	10.305	-1.36146	0.0153531	-1.69521	11	2301997	2318200							1
ENSG00000066735	KIF26A	kinesin family member 26A	6.70643	21.7919	-1.50932	0.000225028	-1.70017	14	104138723	104180894							1
ENSG00000130700	GATA5	GATA binding protein 5	1.89863	6.18099	-1.58731	0.0420856	-1.70288	20	62463497	62475970							1
ENSG00000119686	FLVCR2	feline leukemia virus subgroup C cellular receptor family member 2	2.29693	7.48843	-1.49826	0.0322012	-1.70496	14	75578617	75663214							1
ENSG00000184809	B3GALT5-AS1	B3GALT5 antisense RNA 1	2.28797	7.4987	-1.70232	0.0167643	-1.71257	21	39597147	39612821							1
ENSG00000132031	MATN3	matrilin 3	1.88967	6.23491	-1.8338	0.024412	-1.72223	2	19992111	20012694							1
ENSG00000266865	AC138207.8		7.71073	26.0727	-1.6696	5.11878e-05	-1.7576	17	31008497	31093127		1					0
ENSG00000277481	PKD1L3	polycystin 1 like 3, transient receptor potential channel interacting	2.46336	8.39601	-1.81787	0.009538	-1.76907	16	71929538	71999978							1
ENSG00000251665	AC005920.3		2.08298	7.11072	-1.61506	0.0277502	-1.77134	17	50944104	50948750		1					0
ENSG00000235621	LINC00494	long intergenic non-protein coding RNA 494	1.90759	6.63478	-1.52465	0.0415191	-1.7983	20	48359950	48370629			1				0
ENSG00000175604	AC007601.1		1.61654	5.66206	-2.08421	0.0185231	-1.80842	16	12086746	12090302		1					0
ENSG00000136859	ANGPTL2	angiopoietin like 2	2.08298	7.33761	-1.65213	0.0158403	-1.81666	9	127087332	127122883							1
ENSG00000263829	SINHCAFP1	SINHCAF pseudogene 1	2.54047	9.14249	-1.59011	0.0105302	-1.84749	18	26255698	26256355	1						0
ENSG00000264273	AC107982.2		1.86904	6.76411	-1.77045	0.035634	-1.8556	17	18859354	18861466		1					0
ENSG00000144063	MALL	mal, T cell differentiation protein like	2.03547	7.50098	-2.06138	0.0103878	-1.88171	2	110083870	110116566							1
ENSG00000254737	OR10G4	olfactory receptor family 10 subfamily G member 4	1.01326	3.85286	-2.37191	0.0466587	-1.92693	11	124012997	124018732							1
ENSG00000230928	AL139241.1		1.2272	4.86394	-2.14373	0.0450942	-1.98675	10	98252023	98256575		1					0
ENSG00000167785	ZNF558	zinc finger protein 558	1.01326	4.07315	-2.46823	0.0369487	-2.00714	19	8806170	8832328							1
ENSG00000176769	TCERG1L	transcription elongation regulator 1 like	1.45011	6.17439	-1.89402	0.0246055	-2.09014	10	131092391	131311721							1
ENSG00000229081	LINC01165	long intergenic non-protein coding RNA 1165	1.26575	5.43451	-2.01404	0.0295085	-2.10215	10	132520827	132522449			1				0
ENSG00000176593	AC008969.1		3.47662	15.0212	-2.25571	0.000123622	-2.11124	19	58002061	58011232		1					0
ENSG00000234949	AC104667.2		1.27471	5.51652	-1.76356	0.0414851	-2.11359	2	237591020	237595981		1					0
ENSG00000214720	KRT18P49	keratin 18 pseudogene 49	1.44115	6.24085	-2.16165	0.0237217	-2.11452	0	107428630	107429461	1						0
ENSG00000163016	ALMS1P1	ALMS1, centrosome and basal body associated protein pseudogene 1	1.2272	5.32734	-2.34395	0.0164287	-2.11804	2	73644919	73685576	1						0
ENSG00000271434	AL445237.1		1.27471	5.55423	-1.78309	0.0478441	-2.12341	10	124447152	124450048		1					0
ENSG00000267062	AC018761.2		1.26575	5.59853	-2.0344	0.0334565	-2.14505	19	12796823	12801849		1					0
ENSG00000205971	AC074389.1		1.48866	6.59707	-1.76008	0.0252567	-2.14781	7	1692810	1694325		1					0
ENSG00000158477	CD1A	CD1a molecule	1.05181	4.66221	-2.1383	0.0434006	-2.14814	1	158254137	158258269							1
ENSG00000267466	AC021683.1		0.808271	3.58826	-2.33838	0.0498155	-2.15037	17	77563368	77568695		1					0
ENSG00000258584	FAM181A-AS1	FAM181A antisense RNA 1	0.594326	2.67474	-2.72218	0.0386568	-2.17007	14	93904730	93927066							1
ENSG00000279625	AL591122.1		1.4797	6.68804	-1.99268	0.0205403	-2.17628	1	22364630	22366482		1					0
ENSG00000234186	C16orf82	chromosome 16 open reading frame 82	0.837863	3.86247	-2.46082	0.0322489	-2.20474	16	27066707	27069165							1
ENSG00000275906	NAPGP2	N-ethylmaleimide-sensitive factor attachment protein, gamma pseudogene 2	1.06077	5.1603	-1.94397	0.0357946	-2.28235	6	30961403	30962396	1						0
ENSG00000169508	GPR183	G protein-coupled receptor 183	0.594326	2.97705	-2.86514	0.034552	-2.32456	13	99294530	99307405							1
ENSG00000128438	TBC1D27P	TBC1 domain family member 27, pseudogene /// TBC1 domain family member 27, pseudogene #or# TNF receptor superfamily member 13B	1.83049	9.43885	-2.47279	0.00101868	-2.36638	17	16922915	16934839	1						0
ENSG00000179299	NSUN7	NOP2/Sun RNA methyltransferase family member 7	0.594326	3.08422	-2.95111	0.0315589	-2.37558	4	40749897	40809985							1
ENSG00000233026	MTCO1P5	mitochondrially encoded cytochrome c oxidase I pseudogene 5	2.10362	11.0755	-2.38845		-2.39642	3	12165299	12165642	1						0
ENSG00000272444	AL118558.4		1.02222	5.40341	-2.42743	0.0159874	-2.40217	14	101952416	101953063		1					0
ENSG00000152454	ZNF256	zinc finger protein 256	1.2272	6.52166	-2.65842	0.00502799	-2.40987	19	57940833	57947675							1
ENSG00000262209	PCDHGB3	protocadherin gamma subfamily B, 3	0.808271	4.3222	-2.62687	0.0259823	-2.41885	5	141370264	141512979							1
ENSG00000262133	AC087392.2		0.808271	4.50177	-2.65686	0.0265406	-2.47758	17	877902	880093		1					0
ENSG00000249740	OSMR-AS1	OSMR antisense RNA 1 (head to head)	0.632877	3.56611	-2.34266	0.0499096	-2.49435	5	38710367	38845829							1
ENSG00000148377	IDI2	isopentenyl-diphosphate delta isomerase 2	0.846822	4.77598	-2.25544	0.0349674	-2.49567	10	1018907	1025859							1
ENSG00000184361	SPATA32	spermatogenesis associated 32	0.632877	3.58826	-2.34504	0.0494972	-2.50329	17	45254393	45262112							1
ENSG00000232063	AL691447.2		0.594326	3.57572	-3.1597	0.0237642	-2.58891	9	94332476	94360948		1					0
ENSG00000269834	ZNF528-AS1	ZNF528 antisense RNA 1	0.418931	2.57718	-2.69509	0.0466234	-2.62101	19	52388842	52397766							1
ENSG00000238111	AC066692.1		0.641836	4.24679	-2.13626	0.0459482	-2.72609	2	23900693	23901149		1					0
ENSG00000270117	AP000769.2		0.418931	2.93934	-2.85439	0.0362666	-2.81071	11	65498010	65498405		1					0
ENSG00000276272	AC024884.2		0.594326	4.30664	-3.4	0.0120435	-2.85724	12	56411944	56413190		1					0
ENSG00000184659	FOXD4L4	forkhead box D4 like 4	0.846822	6.16544	-2.60464	0.00968647	-2.86407	9	65736555	65738784							1
ENSG00000131849	ZNF132	zinc finger protein 132	0.418931	3.08422	-2.95259	0.0305435	-2.88012	19	58432814	58440222							1
ENSG00000229031	MTCO1P25	mitochondrially encoded cytochrome c oxidase I pseudogene 25	5.90984	46.6137	-2.95884		-2.97957	7	69331835	69333633	1						0
ENSG00000159251	ACTC1	actin, alpha, cardiac muscle 1	2.08298	17.8101	-3.04692	0.0456313	-3.09598	15	34788096	34796139							1
ENSG00000272583	AL592494.3		0.427891	3.86907	-2.57649	0.0393661	-3.17667	1	121518366	121518829		1					0
ENSG00000258628	AC126603.1		0.427891	4.5934	-2.76031	0.0165056	-3.42425	15	20228620	20277503		1					0
ENSG00000275427	AF067845.2		0.213945	2.77231	-2.76858	0.0430879	-3.69577	8	1296034	1302607		1					0
ENSG00000229127	AC007038.1		0.213945	2.89203	-2.78928	0.0376503	-3.75677	2	210030733	210064356		1					0
ENSG00000254094	AC078852.2		0.213945	2.90164	-2.87384	0.0449856	-3.76155	4	1356581	1358075		1					0
ENSG00000121797	CCRL2	C-C motif chemokine receptor like 2	0.213945	2.97705	-2.88917	0.0308361	-3.79857	3	46407163	46412997							1
ENSG00000258230	AC063950.1		0.213945	2.9992	-2.90601	0.0488284	-3.80926	12	101773114	101773755		1					0
ENSG00000255970	LINC02421	long intergenic non-protein coding RNA 2421	0.213945	3.04652	-2.97221	0.0278521	-3.83185	12	67709047	67729475			1				0
ENSG00000231971	AL078590.2		0.213945	3.14408	-2.9979	0.0493051	-3.87733	6	134428240	134520585		1					0
ENSG00000234988	LINC01849	long intergenic non-protein coding RNA 1849	0.213945	3.2638	-3.01755	0.023747	-3.93124	2	100607028	100609358			1				0
ENSG00000237624	OXCT2P1	3-oxoacid CoA-transferase 2 pseudogene 1	0.213945	3.39313	-3.10425	0.0214837	-3.9873	1	39514956	39516490	1						0
ENSG00000283511	AC137936.2		0.213945	3.66367	-3.16644	0.0192676	-4.09798	3	58180009	58187495		1					0
ENSG00000234576	MTND1P26	mitochondrially encoded NADH:ubiquinone oxidoreductase core subunit 1 pseudogene 26	1.69364	32.5457	-4.22097		-4.26426	2	131385700	131386237	1						0
ENSG00000260972	Z98259.1		0	2.1611	-3.37294	0.0307486	?	1	5492978	5494674		1					0
ENSG00000235235	IGKV1OR2-1	immunoglobulin kappa variable 1/OR2-1 (pseudogene)	0	2.09163	-3.27319	0.0434917	?	2	91817771	91818248	1						0
ENSG00000214980	AC025538.1		0	2.25272	-3.485	0.0166952	?	4	84244003	84245488		1					0
ENSG00000234117	AL445224.1		0	2.37838	-3.47919	0.0496461	?	6	116492297	116497099		1					0
ENSG00000280193	AC132219.2		0	4.31626	-4.40615	0.0014446	?	8	81696368	81698694		1					0
ENSG00000230601	TEX48	testis expressed 48	0	2.18325	-3.37635	0.0236411	?	9	114666434	114682066							1
ENSG00000166787	SAA3P	serum amyloid A3, pseudogene	0	2.1611	-3.37422	0.0400504	?	11	18112472	18116132	1						0
ENSG00000259887	AC068987.1		0	2.75016	-3.71434	0.0191801	?	12	51848223	51852729		1					0
ENSG00000267868	AL356740.1		0	2.04798	-3.32846	0.024891	?	13	112964835	112966131		1					0
ENSG00000232105	RPL32P28	ribosomal protein L32 pseudogene 28	0	2.10124	-3.34875	0.042094	?	13	62327988	62328384	1						0
ENSG00000260279	AC137932.1		0	4.0576	-4.284	0.00578093	?	16	89297508	89298317		1					0
ENSG00000263219	RYKP1	receptor-like tyrosine kinase pseudogene 1	0	2.31258	-3.49227	0.034945	?	17	4222091	4223828	1						0
ENSG00000283405	AL121759.2		0	2.06353	-3.33076	0.0425529	?	20	21089696	21090509		1					0
ENSG00000226872	AC002472.1		0	2.02583	-3.3125	0.0440233	?	22	21031357	21043969		1					0
ENSG00000278881	FP325331.1		0	2.12339	-3.35663	0.0285925	?	22	47115838	47117217		1					0
