# Supplementary material for: The role of reciprocal fusions in MLL-r acute leukemia: studying the chromosomal translocation t(6;11)
Source: Oncogene. 2021 Aug 5;40(40):5902–12. doi: 10.1038/s41388-021-01983-3 (PMC8497272; doi:10.1038/s41388-021-01983-3)
Supplement: Supplementary file 14 — MACE Heatmap dataset 1 [file 41388_2021_1983_MOESM14_ESM.xlsx]

## Sheet: Sheet1
gene symbol	MLL_AF6 log2	AF6-MLL log2	CO1 log2
PEG10	0.431935	0.311314	8.54566
NOV	0.466858	0.150795	8.49401
HSPA1A	-1.40134	-1.6316	7.76564
HSPA1A	-1.40134	-1.6316	7.76564
SLFN11	0	0	6.83498
PKP3	0.164745	0.566624	6.49242
CD44	-0.302987	0.298228	6.06146
TNC	0.873072	-0.37224	5.90968
C2CD2	0	0	5.84218
SOX11	1.25499	0.219968	5.62965
PTGR1	-0.0567352	0.567186	5.62133
RIOX1	0.300971	0.543794	5.53611
MLH1	-0.417571	0.12204	5.2917
ZNF544	0.414736	0.541335	5.28848
KLF8	-0.161408	0.401938	5.21105
GSPT2	0.376645	0.699577	5.17018
DHRS2	4.09501	-0.242101	5.05579
GADD45G	-0.299305	0.093117	5.03829
ZNF331	0.213608	0.0340859	4.98692
TCF15	0	0	4.86637
PINCR	-0.283789	-0.00338924	4.73602
KRT17	3.31782	0.224094	4.71106
TGFBR3L	-0.0281385	0.543332	4.69143
RFPL4A	2.6366	0.151109	4.67552
FOXL2	-0.282695	0.199275	4.57391
ZNF625	0	0	4.56367
PLP2	0.335581	-0.116744	4.5106
DPYSL3	0.576099	0.371895	4.40298
CLEC3A	0	0	4.35
RFPL4AL1	1.65951	0.168865	4.31736
EPPK1	1.04141	0.49438	4.29102
MTRNR2L10	-0.782649	-0.453125	4.24274
PRRX2	0.345695	0.354107	4.20949
COL9A3	-0.242824	0.356199	4.19807
MIF	0.271517	4.27718	4.17138
NHLH2	0.740626	0.0948989	4.14232
ZNF83	-0.461941	0.161027	4.12364
HES5	0.62857	0.25718	4.11662
HBD	0.0157186	0	4.05071
VCX3B	2.26599	0.559212	4.03583
ANOS1	-0.143961	0.0575248	3.9652
B3GALNT1	0.0191319	0	3.93643
FBXO6	0.106298	0.654138	3.92811
SLC35D2	-0.164064	0.455507	3.91745
ZNF682	0.166889	0.397713	3.91543
NEFM	0.18837	0.388714	3.91281
KMT2A	0.527757	3.0852	3.90699
STMN2	-0.180661	-0.217991	3.90345
SPANXN3	1.90084	0	3.88806
WWC3	0.199875	0.468698	3.88007
NECTIN4	1.99796	-0.276886	3.85313
KLF4	-0.489378	-0.0240169	3.83799
FRG2C	3.13068	0.151865	3.82085
JAKMIP2	-0.603352	0.255269	3.80019
HSPE1-MOB4	0.18663	2.07667	3.79462
PLXNB3	3.12165	-0.700041	3.78335
VCX	1.90359	0.25963	3.77202
MROH8	0.873062	0.734849	3.74376
P4HTM	0.6714	0.622757	3.73846
SIX3	0.4056	-0.331293	3.71775
SNAI1	2.13098	0.751896	3.712
CCND1	0.755091	0.109272	3.70341
CCL20	2.98147	0.377231	3.69979
AMBN	0.570547	0.497816	3.69556
HES2	0.0403753	0.73951	3.67383
CSRP1	0.130145	0.263291	3.66674
KLHDC9	0	0	3.66313
WDR72	-0.00355684	0.342657	3.66295
MBD3L2B	4.11432	0.135426	3.59858
TNFRSF10D	0.978234	-0.1757	3.52549
NME2	0.224264	2.98677	3.4698
CGREF1	1.5912	0.356323	3.46976
L1CAM	0.342243	0.021704	3.45104
HBA2	0.695673	0.703843	3.44819
FRG2B	3.4813	0.07635	3.3938
FSCN1	1.53626	0.269533	3.39217
HLA-DPB1	0.13427	-0.122243	3.39046
FRG2	3.24991	-0.185907	3.35401
NEFL	0.270977	0.421677	3.34195
ALPG	3.62323	-1.09801	3.29995
ZNF883	0.570265	-0.153325	3.27884
PPIAL4C	0.504644	2.63503	3.26922
MAFA	1.96734	0.118371	3.26388
CPXM1	0.0410121	0	3.26213
CXorf51B	2.00358	0	3.21404
FLRT2	-0.0865286	0.118833	3.2105
IL32	3.10188	-0.165678	3.19047
LGALS3	0.2879	-0.129995	3.18799
VCX2	2.37074	0.250178	3.17269
SLC6A3	2.24967	0.245755	3.16894
CCNA1	1.48377	-0.170145	3.14906
TDRP	0.362723	0.571673	3.13907
SPANXN5	2.35183	0.0562278	3.12328
POMZP3	-0.142532	0.183177	3.09976
ID1	1.13563	0.301317	3.07905
GFRA2	0.348358	0.254377	3.06073
ZP3	-0.0600195	0.154752	3.04443
VGF	2.79278	-0.401981	3.04347
DUSP4	0.0551121	-0.0423014	3.03715
ENPEP	-0.125466	0.221073	3.0246
FERMT3	0.0705848	-0.194842	3.00114
TOMM5	0.293163	2.22952	2.98892
DNASE1L2	0.782218	0.265988	2.97339
TMEM173	0.190823	0.405159	2.97252
ZNF813	-0.0945255	-0.0325673	2.96103
STAC	0	0	2.95991
ZNF91	0.044249	-0.0471888	2.94936
TRIM43	3.01806	0.444479	2.94212
CLCN4	0.108216	0.674371	2.93346
SLPI	0.840997	0.164858	2.92897
NGFR	2.70479	0.205971	2.9261
SCARA5	0.429552	-0.427405	2.92529
TPRX1	3.65842	-0.48481	2.90078
ARHGAP4	0.424277	2.00731	2.89876
ZNF595	0.731676	0.137677	2.89377
RNF122	-0.0328348	-0.322573	2.89316
IER5L	0.930291	0.443444	2.89123
CLU	-0.0248355	-0.230506	2.8712
APC2	0.107753	0.140686	2.87082
ZNF528	0.362569	0.314807	2.86583
ARF5	0.0349982	2.40328	2.86135
EDA2R	0.124468	-0.441683	2.85971
MBD3L2	3.42897	-0.0678634	2.84579
SERPINE1	4.14485	-0.553248	2.84181
DSEL	-0.239999	0.0273094	2.83709
PHLDA2	0.667669	0.130285	2.82446
ZNF229	0.365997	0.128116	2.80965
SELENOP	0.0385747	0.510163	2.80446
HIST1H4I	0.224689	2.00058	2.79138
LPAR6	0.414481	0.437982	2.78635
EGR1	1.43421	0.233547	2.7781
CXCL8	2.73779	0.275134	2.77806
ONECUT3	0.920922	0.643628	2.76788
ERVMER34-1	0.0707249	0.424785	2.75625
UNCX	1.17396	-0.248761	2.7473
RFPL2	3.93994	-0.750257	2.74291
MT1G	1.24736	0.345565	2.7405
IGF2	1.41917	0.565389	2.72905
VCX3A	1.60529	0.190083	2.72358
ZNF600	0.178474	0.423358	2.70531
SAMD5	0.358907	1.01471	2.70466
ZNF700	0.150142	0.261677	2.703
GRIN1	0.696573	-0.000664772	2.70154
LRRK1	0.185448	-0.137745	2.69753
NRARP	0.216816	0.716452	2.69581
EPS8L2	0.938806	-0.411591	2.68991
ZNF433	0.3857	0.938839	2.6818
MYOM3	0	0	2.67709
DIO3	2.82299	-0.243741	2.66907
GALNT3	0.104089	0.469925	2.65354
HRC	1.37668	0.340931	2.6521
KHDC1	0.555191	0.277272	2.64257
C6orf141	0.886306	0.615056	2.61936
RASD1	1.52165	0.103326	2.61417
LRAT	0.329227	0.430457	2.5933
RFPL4B	2.82154	0.101082	2.59305
RFPL4B	2.82154	0.101082	2.59305
PGR	-0.589721	-0.245808	2.57742
S100A4	1.49206	-0.0091506	2.56499
HBM	0.469922	0.00318414	2.54367
ETV7	3.284	0.0955479	2.53726
PPIAL4G	-0.405204	2.03848	2.53543
PPP1R1C	-0.0882807	0.373682	2.53162
TMPRSS9	0.738294	0.367109	2.53031
STAB1	0.666184	0.599565	2.51664
KCNK6	0.455956	0.461207	2.51369
HAS2	0.089278	-0.541591	2.51141
CXorf51A	1.69277	0	2.50749
SUMO4	0.108517	0.574951	2.48145
CLIC3	1.05249	0.489721	2.48132
IKZF3	0.243925	-0.375627	2.47167
ENPP2	0.908503	0.139287	2.47127
MBD3L5	2.66042	0.22862	2.46376
STEAP1B	0.0984183	-0.31395	2.45754
CHRM3	0.10385	-0.186951	2.45686
FEZF1-AS1	0.305363	-0.0201687	2.44414
HSPA1L	0.479156	-0.274586	2.43461
BASP1	0.0936833	-0.0864902	2.42253
MAGEH1	0.174676	-0.531032	2.42119
BEX1	1.00534	1.22738	2.4147
FAM71F2	0.273359	0.05127	2.41429
PRPH	0.103548	0.610018	2.37951
ELFN1-AS1	0.436631	-0.0351295	2.37433
HMOX1	1.48911	0.0943515	2.35692
SOWAHC	-0.205824	0.212203	2.35159
POU6F2	0.118344	0.305009	2.35053
CRACR2B	0.00756366	0.0645945	2.34478
MAGEB2	-0.243145	-0.185735	2.32826
SLC34A2	3.25713	-0.0425431	2.32176
TAP2	0.61416	0.060464	2.32089
SOST	2.6335	0.226747	2.30999
KLK1	-0.253702	-0.116448	2.30909
ZNF280A	2.19802	0.0408571	2.30865
CGA	0.282241	0.0129561	2.30722
PRM2	2.67575	0.118158	2.2962
ARSJ	0.109348	-0.0393831	2.29617
HBZ	0.934224	0.237047	2.2858
CRISPLD2	2.60413	0.703578	2.25996
S100A2	2.41684	-0.352427	2.25623
RNF223	2.01846	0.17659	2.25258
ZNF681	0.00181324	0.704044	2.25014
ZNF506	0.235077	0.8534	2.23342
ST8SIA2	-0.137552	0.0159819	2.21583
ARC	1.37685	-0.905639	2.1889
ECHDC2	-0.233987	-0.218859	2.1769
LFNG	0.753871	0.954131	2.17431
MYC	-0.747924	-0.324954	2.16908
KLK8	0.142143	0.733367	2.15824
ID3	0.440259	0.556008	2.15692
ANXA2	0.198813	0.257901	2.15687
S100A10	0.41795	0.441078	2.1548
DNAH3	2.21731	0.370217	2.14659
TUBA1A	0.396658	0.389401	2.14037
TRIM43B	2.10179	0.134217	2.13751
SNX19	0.101164	-0.00421974	2.12966
ZC3HAV1L	0.237057	1.39172	2.12834
NEFH	1.98308	0.395623	2.12466
CPNE7	0.133915	0.235949	2.11016
FLNA	0.182307	-0.102798	2.10321
PAPLN	0.0338433	-0.0878368	2.09115
SP5	0.147881	0.331243	2.08869
UBE2L5	0.294349	1.02766	2.08206
TMEM240	0.0500703	0.205156	2.07795
DNAAF3	0.471802	0.434721	2.07265
EXO5	0.503593	0.021478	2.05772
H19	1.10663	1.09492	2.05135
LHX1	0.470636	-0.0528195	2.04938
ZNF888	0.582076	0.188952	2.04818
EDARADD	0.131851	1.3316	2.04669
AHNAK	0.0724843	-0.0838394	2.04586
S100A11	0.621423	0.2134	2.04158
IER3	1.78319	0.277674	2.03978
HAS2-AS1	-0.183044	0.124352	2.02809
SLC16A3	0.130691	0.479625	2.01778
CDYL2	0.140993	0.0849499	2.01252
TENT5C	1.73646	0.408653	2.0082
STX11	0.631288	0.041464	2.00797
NDUFC2-KCTD14	0.364642	1.08738	2.00649
NSMF	0.0367783	0.154418	2.0043
MAOA	0.140249	-0.137593	1.99555
ESPN	0.45925	0.255569	1.99533
MBD3L4	2.65661	0.00620083	1.99387
ZNF525	-0.549799	-0.141826	1.99234
GAST	3.26018	-0.0339246	1.98966
CRLF1	0.568582	0.208902	1.98266
RFTN1	0.249768	0.575951	1.96483
TRIM58	0.298823	0.0774344	1.96443
STS	0.116177	0.208919	1.96356
TNFSF9	1.09156	0.582305	1.95311
VASN	1.77273	0.339967	1.95082
PYY	2.80522	-0.0755855	1.94157
SMPD2	0.0651099	0.312946	1.94001
PLK2	0.772405	0.308781	1.93747
FOSL1	-0.155426	-0.517622	1.92949
RRAD	4.04663	-1.19904	1.92776
RRAD	4.04663	-1.19904	1.92776
TWIST2	-0.118482	0.0514526	1.92538
SULT1A4	0.459156	0.17342	1.92299
FOSB	2.13672	0.234406	1.92226
ZNF534	-0.127976	1.06375	1.90969
PDIA2	-0.0996703	-0.538795	1.9087
CRIP3	0.430013	0.115851	1.90794
HBA1	0.178804	-0.116316	1.90704
SMIM24	2.3299	-0.0124835	1.88745
PRR16	0.280044	0.206156	1.88024
PCAT1	-0.102454	-0.510168	1.8779
H2BFS	0.803573	1.54904	1.8728
IL16	2.47161	0.137807	1.86458
LMNTD1	-0.154888	0.473429	1.85716
MBD3L3	2.63841	-0.249228	1.85338
ANP32C	0.412268	1.69224	1.84951
ZNF35	0.541911	0.288653	1.81496
SHH	0.916776	0.27535	1.81105
WNT7B	0.978426	-0.271235	1.80996
CKM	1.6211	0.196407	1.7991
ZNF559-ZNF177	0.268523	0.600472	1.79336
CYP1A1	1.10538	-0.199817	1.79227
NR1H4	3.05868	0.301446	1.79172
ZNF304	0.790185	0.0716158	1.77658
ZNF85	-0.39143	0.0191003	1.76285
ZNF816	0.173579	0.883686	1.75455
SH2D3A	0.74105	0.197039	1.7285
EFEMP2	-0.47166	-0.220318	1.72754
PLCB2	0.252731	0.399982	1.68617
PPP6R1	0.610503	0.965207	1.67824
ATXN8OS	-0.589939	0.984066	1.66614
IFI27	0.10319	-0.804165	1.65027
SFN	1.81139	0.208708	1.64784
DLL4	0.757096	0.838326	1.63175
RND1	2.5416	0.27361	1.62909
ACTL8	0.530364	0.623385	1.6199
ACSBG1	1.28167	-0.326626	1.59882
ZNF529-AS1	0.3015	0.699934	1.59615
SLC2A14	3.05073	0.55954	1.59283
TNF	3.17887	-0.168058	1.59107
ZNF625-ZNF20	0.311802	0.0589591	1.59084
ATOH8	0.0750152	-0.0101183	1.58211
MYO18A	0.400619	0.392165	1.58171
GPHA2	0.223063	0.701899	1.57102
BIK	0.547648	0.0808144	1.54962
C10orf95	0.169571	0.698291	1.54526
CASC9	0.00276616	0.196451	1.54068
GPR37	0.0461688	0.669106	1.53266
FOXA3	0.714973	0.265639	1.52403
SYNGR4	0.0049661	0.292914	1.52373
COL6A3	0.2782	-0.00306311	1.51307
FGF13	-0.343217	-0.028992	1.47799
KRTAP19-5	0.551794	-0.296888	1.47247
NPB	0.107623	0.0209905	1.46981
CRYBA2	-0.379911	0.13583	1.46283
GNRH1	1.58703	0.159788	1.44115
SOCS1	0.516874	0.16628	1.44058
SYT11	-0.39249	-1.20186	1.43835
ALPP	2.95237	-0.328194	1.43185
INPP4B	0.104008	0.0319483	1.42951
PILRB	0.0295095	0.0871842	1.42077
TGFB2	0.190424	-0.360167	1.38587
HIST1H2BO	0.742222	0.401354	1.3716
OXCT2	0.083143	0.627042	1.33739
TNFRSF9	2.29651	-0.168298	1.30161
PLK5	0.294233	0.0985485	1.30027
RFPL1	3.0467	0.187717	1.15147
ELF3	3.73601	-0.443843	1.07597
RELB	2.14523	-0.0805555	0.882759
ZDHHC11	-0.0742187	-1.38868	0.778311
NTS	2.24102	0.247444	0.71875
CLDN4	2.50807	-0.223897	0.484904
XIRP1	1.93065	-0.48777	0.436582
PPL	2.13137	-0.131606	0.43413
FCGR2A	-0.0297981	1.42266	0.161662
GDF15	2.92048	-0.788104	0.00667287
CDKN2A-DT	2.54555	-0.405991	-0.0914447
SUSD2	1.74445	-0.563727	-0.315805
CELF3	1.49305	-0.0802237	-0.549539
RASSF2	0.344521	0.413895	-1.032
FLRT3	0.75955	-0.345257	-1.08482
NECAB2	-0.271376	-0.207064	-1.11503
RNVU1-18	0.376416	0.387221	-1.14037
LURAP1L	-0.30882	0.109047	-1.14164
ESRRB	0.255461	0.426858	-1.14649
SAMD13	0.0405688	-0.518062	-1.17073
RNU1-2	0.404645	0.471878	-1.17108
SLC4A3	0.0349861	-0.155724	-1.1938
ASGR1	-0.0147651	-0.198489	-1.19956
CD40	0.471429	0.100947	-1.20916
LAMP3	0.0285523	-0.242884	-1.2165
VWDE	-0.334019	-0.0148715	-1.23764
PCAT6	-0.278326	0.167425	-1.25043
COL5A2	-0.256566	-0.119815	-1.25118
C22orf23	-0.223612	0.114799	-1.26064
CCR10	-0.386507	-0.133986	-1.26456
RNU1-3	-0.0156367	-0.164409	-1.28885
TMEM254-AS1	0.136837	-0.63303	-1.29872
ARAP3	-0.29249	-0.590543	-1.2996
CCDC151	0.0760948	-0.0408269	-1.29967
NDUFA4L2	-0.424108	0.176538	-1.30319
SFTA3	-0.234886	0.0945019	-1.31081
EPCAM	-0.352304	-0.694639	-1.32194
CDH12	-0.0717876	-0.187985	-1.32258
OSBPL7	0.445129	-0.0806988	-1.32411
IFIT1	0.304359	-0.0229058	-1.32421
SERPINB9	0.251364	0.330446	-1.32564
ITGB4	0.116015	0.080481	-1.3315
TCEAL7	-0.127669	-1.57576	-1.33635
RNF165	-0.396555	-0.457214	-1.3372
LRRN2	0.311944	0.00798505	-1.33808
RUBCNL	0.0739446	-0.229519	-1.34033
SEPT4	-0.423154	0.530134	-1.34955
PPFIA4	-0.0675463	-0.363702	-1.35154
ASXL3	-0.0638703	-0.0445162	-1.3588
RNU1-1	0.0221377	-0.361407	-1.36103
CYP26A1	0.379958	0.229804	-1.36445
ZNF879	0.170059	-0.467111	-1.37147
ERAP2	0.681214	-0.899198	-1.38276
IDH1-AS1	-0.0205405	0.583958	-1.38693
PCSK4	-0.622359	-0.135996	-1.39288
SSPN	-0.257644	-0.409133	-1.39585
DISC1	-0.0159203	-0.160901	-1.39804
FIBIN	0.0895679	-0.167399	-1.39952
SYT6	-0.885977	-0.0906524	-1.40292
HDHD5-AS1	-0.421018	-0.648775	-1.40401
TEX45	-0.309374	0.0463722	-1.40576
RNF207	0.598302	-0.186789	-1.40676
CADM2	-0.0464979	0.141329	-1.41484
JAKMIP1	-0.136387	-0.332524	-1.41512
TMEM100	-0.0818799	-0.236175	-1.41646
MGAT5B	-0.0042078	-0.212272	-1.42966
AK7	-0.379493	-0.486411	-1.4396
COLEC11	-0.141831	-0.398608	-1.43974
L3MBTL1	-0.113513	-0.695593	-1.44049
SCARNA13	0.86737	-0.222053	-1.44301
PLCD1	-0.268538	0.400579	-1.44484
PPP1R3G	-0.141815	-0.120384	-1.45337
PDZD4	-0.0848309	-0.116983	-1.47109
TTC25	-0.416782	-0.147311	-1.4711
CASC2	-0.155136	-0.388724	-1.47362
SNAP91	-0.34385	-0.261922	-1.4745
MST1	-0.230185	-1.19394	-1.48081
AATK	-0.102167	0.1455	-1.48273
IKBKE	0.322472	0.225837	-1.48498
FENDRR	-0.0104135	0.245021	-1.48581
ZNF423	-0.227789	-0.773039	-1.49194
CDH15	-0.429641	1.39756	-1.5109
TRIB2	0.00247435	-0.125535	-1.51627
SYT17	0.0169294	-0.184752	-1.51945
RNU1-4	0.420854	0.0632732	-1.52084
FOXE1	-0.0690241	-0.330451	-1.53872
RARA-AS1	-0.648202	-0.497556	-1.54161
ADCYAP1R1	0.172321	0.00100913	-1.54599
SYT14	-0.0801848	-0.273139	-1.55076
UBE2L6	0.844187	-0.256204	-1.55291
SFRP1	-0.203237	-0.404351	-1.55476
RAB3C	0.0948199	-0.0270223	-1.556
AMIGO1	0.0875191	-0.262907	-1.55804
PAK3	-0.4747	-0.302464	-1.56242
TMEM163	-0.103464	0.221972	-1.5648
CYP26B1	-0.201747	-0.460742	-1.56682
LY6G6F-LY6G6D	0.0413515	0.523999	-1.57195
CFAP300	-0.173036	-0.303381	-1.5735
LRRC73	-0.389177	-0.502902	-1.57834
ANK1	0.605479	-0.776696	-1.57992
STUM	-0.554728	-0.533535	-1.58371
LYRM9	-0.33965	0.184462	-1.59621
RBM43	-0.581523	-0.309706	-1.59873
BDH1	0.158108	0.227453	-1.59994
SLC9A5	-0.413878	-0.831029	-1.60815
IDNK	-0.00858221	-0.338087	-1.61079
OLFM2	-0.0741008	-0.273095	-1.61305
HOXC-AS2	-0.432708	0.141637	-1.61607
ACCS	-0.0901405	-0.51282	-1.62161
MGAT3	-0.145609	-0.510215	-1.62237
SUCLA2-AS1	-0.125008	-0.681884	-1.62287
FRRS1L	0.367571	0.322302	-1.62867
USP51	0.144976	-0.199817	-1.63209
ZFHX2	0.130061	-0.464678	-1.63927
NALT1	-0.799249	-0.841749	-1.64192
PANX2	0.0400826	0.204469	-1.65061
PLEKHA7	-0.2817	-0.241532	-1.65199
ADSSL1	-0.163082	0.0133362	-1.65416
ZNF396	-0.0762736	-0.698663	-1.65529
ST3GAL1	-0.23288	-0.427037	-1.65661
G0S2	0.0453857	0.0805572	-1.66142
PSTPIP2	0.0307777	0.266438	-1.66195
GDF7	-0.307474	-0.308821	-1.66879
C19orf57	0.0545653	-0.686428	-1.67197
ZC3H6	-0.234213	-0.640029	-1.67644
FBXL16	-0.241978	-0.150014	-1.67813
PRDM16	-0.190778	-0.856761	-1.67929
APLF	0.0428702	-0.701928	-1.68031
TSHZ2	0.432957	0.0163119	-1.6868
PKNOX2	-0.28611	-0.236473	-1.69021
GSTM4	0.402045	0.662946	-1.70312
USP44	0.115877	-0.0387261	-1.70585
SLC22A17	-0.235484	0.275537	-1.71615
PARD6A	-0.06645	0.485261	-1.71619
NAP1L3	0.241094	0.188329	-1.72227
IFITM3	0.241773	-0.219981	-1.72993
RHPN1	-0.13817	0.17676	-1.73138
SDSL	0.280054	0.0730288	-1.73361
TMC3-AS1	-0.0840276	0.692562	-1.73644
MAP3K15	-0.60004	-0.604444	-1.73807
SLC13A3	-0.299073	-0.515144	-1.73895
GYG2	0.0777813	0.0507068	-1.74142
LRRC24	-0.287968	-0.0202084	-1.74207
TTYH2	-0.364828	0.0283772	-1.74257
BAIAP2-DT	-0.118455	-0.173272	-1.74795
HCN3	-0.228224	-0.687745	-1.74801
RORB	0.0340979	-0.545257	-1.7482
MYO15B	-0.793006	-0.800787	-1.74838
HSD17B14	0.230556	-0.183304	-1.7527
CTSO	-0.0487452	-0.153074	-1.75584
JDP2	-0.150651	0.185024	-1.75711
FNDC4	0.233206	0.186993	-1.76194
TMEM116	-0.278648	-0.412156	-1.77349
DUSP2	-0.16108	-0.0479098	-1.78298
TMEM198	-0.361834	0.277683	-1.78415
CCDC136	-0.042387	-0.561278	-1.78755
ICA1	-0.117743	0.0402278	-1.78964
TXNRD3	-0.219176	-0.0824895	-1.79118
ACSF2	-0.281232	-0.21529	-1.79144
TBCK	-0.0527534	-0.416721	-1.79487
APLP1	0.278531	-0.167147	-1.79915
GSDME	0.316028	0.235388	-1.80475
APOE	1.31617	-0.320997	-1.81348
KLRG2	-0.0602959	-0.137863	-1.81896
CFAP44	-0.180811	-0.875562	-1.82166
CCDC15	-0.262635	-0.229833	-1.82571
ZNF467	0.426008	-0.452099	-1.82809
PRKCB	-0.179801	-0.140506	-1.82915
ZCCHC18	-0.239499	0.106233	-1.83145
HOXC10	0.186873	0.182786	-1.83457
TMEM145	-0.290434	-0.164303	-1.8363
FGF11	-0.41098	-0.191228	-1.83646
TMEM255A	-0.336496	-0.537266	-1.83727
IRF8	-0.318042	-0.520254	-1.83744
RPRML	0.0674494	-0.240218	-1.84048
TP53I3	0.700636	0.0588478	-1.84128
RBAK-RBAKDN	-0.313378	-0.887122	-1.84158
NPY1R	-0.339997	0.0875536	-1.84315
ERO1B	-0.367814	0.278058	-1.84637
SPATA20	-0.377333	-0.0516091	-1.84725
TNIK	-0.273369	-0.0365129	-1.85047
RIPPLY3	-0.100646	-0.0913668	-1.85354
FOXB1	-0.646944	-0.202492	-1.86575
CENPBD1	-0.215814	-0.357673	-1.86628
GALNT16	-0.370528	0.0167335	-1.86861
PAQR8	-0.367452	-0.195341	-1.86892
PAOX	-0.112843	0.230118	-1.87403
SDK2	-0.654715	-0.325054	-1.87564
BRCA2	-0.178336	-0.642555	-1.88263
HSPB8	-0.153339	-1.38241	-1.88309
RAMP2	0.240852	0.363197	-1.88573
SIX2	0.0890604	-0.0916565	-1.88739
CYB561	-0.219658	0.136991	-1.8886
SLC4A5	-0.277818	-0.488618	-1.89148
ARHGEF9	-0.197229	-0.279789	-1.89158
RELL2	-0.176951	-0.14423	-1.89734
SFXN5	0.14985	-0.177928	-1.89817
GDF1	-0.240253	0.188485	-1.89977
NDRG4	-0.00841389	-0.603364	-1.90076
INSM1	-0.496088	-0.518624	-1.90107
KAT6B	-0.300262	-0.249075	-1.90286
RAMP1	0.162774	0.283457	-1.90534
GREB1	-0.487554	-0.173306	-1.91432
B4GALT6	0.180261	-0.59213	-1.91894
MAPT	-0.200196	-0.176636	-1.92122
TMEM74B	0.078155	-0.319619	-1.92174
WIPF1	-0.0555803	-0.229581	-1.92361
CDRT4	-0.657599	0.232371	-1.92367
IFI27L2	0.28893	0.356941	-1.9276
SERPINF1	-0.212077	0.309872	-1.92893
CREB3L2	-0.335295	-0.0676952	-1.92938
DNAJB5	-0.412067	0.115286	-1.93241
KIRREL1	-0.258238	-0.125755	-1.93562
MARCH9	-0.196459	-0.136188	-1.94272
CASP8	0.057843	0.155718	-1.94488
BEX5	-0.0731213	0.0701857	-1.94715
KLF6	-0.37821	-0.70752	-1.94868
HIPK2	-0.189601	-0.836731	-1.95158
MDGA2	-0.424286	-0.442052	-1.95361
GNAO1	-0.261213	-0.547848	-1.9546
HOXA11-AS	-0.000576621	-0.0705725	-1.96042
LRP2	-0.09297	-0.0637533	-1.96262
SLC13A4	-0.188649	0.0693488	-1.96318
ABRAXAS1	-0.709851	-0.251265	-1.96363
SEPT3	0.203886	0.0454569	-1.96883
C8orf34	-0.0673147	0.0727261	-1.97799
FAM27C	-0.0466395	-0.211268	-1.98085
GPRASP2	-0.0263013	-0.0455952	-1.98124
PTP4A3	-0.615475	-0.235141	-1.98155
ZBED6CL	-0.206027	-0.157894	-1.98347
FICD	-0.426775	0.145519	-1.98414
KLF15	-0.309522	0.140188	-1.9855
MANF	-0.436819	0.548077	-1.9899
C3orf18	-0.214487	-0.516146	-1.99177
TSPAN10	0.393446	0.0765573	-1.99195
CDK2AP2	-0.373194	0.472361	-1.99234
SEPT6	-0.319475	-0.129884	-2.00283
ZNF783	-0.0421003	-0.584965	-2.0029
CUL9	-0.208581	-0.0860992	-2.00353
TGFB1I1	-0.46279	-0.253973	-2.00353
DSG2	-0.300427	-0.20872	-2.0087
ARPIN	-0.270842	-0.144249	-2.01056
CLSTN3	0.00339352	-0.302983	-2.01426
FZD10	-0.61179	-0.853332	-2.02231
CKLF	0.191845	-0.280378	-2.0289
DDIT3	-1.17545	0.562439	-2.03603
NRN1	-0.929713	-0.0936096	-2.03862
RAB9B	0.106305	-0.13106	-2.04084
ITGA8	0.0978994	-0.273804	-2.04914
ARL17A	-0.110847	-0.0639573	-2.05277
ENHO	0.112362	-0.141317	-2.0533
PCED1A	-0.426148	-0.199663	-2.05597
CDHR1	-0.181352	-0.0467158	-2.05737
B3GNTL1	-0.376047	-0.357736	-2.05758
KCNT2	0.148915	-0.460276	-2.06289
HSPA5	-0.429824	0.850632	-2.06656
FNDC10	-0.0393804	-0.0382744	-2.06913
ADAMTS13	-0.20433	-0.691984	-2.07232
ZSCAN30	-0.240158	-0.364158	-2.07651
TRIB3	-0.411648	0.102843	-2.07848
ZNF503	0.0672568	-0.157127	-2.07989
FREM2	0.0653326	0.144996	-2.08199
DGKA	0.101391	0.118222	-2.08214
SOX7	-0.573153	-0.6568	-2.08816
C8orf31	0.0793226	-0.369438	-2.08914
CADM4	-0.00950243	0.224247	-2.08921
SH3PXD2B	0.207192	-0.193396	-2.09273
OPTN	0.837558	-0.216923	-2.09292
MPP2	0.102353	0.106019	-2.10194
SLC16A2	-0.00226373	0.060066	-2.10442
VEGFB	-0.205042	-0.0605582	-2.10775
GSTO2	-0.0428628	-0.356817	-2.11099
HLA-DOA	-0.724503	-0.122425	-2.11353
HOXC11	-0.0803581	0.0166098	-2.11668
SYP	-0.158289	-0.144688	-2.12008
PXDN	0.161122	-0.0897888	-2.12298
SLC1A4	-0.391897	0.0506333	-2.12318
EFCAB10	0.084912	0.421275	-2.1277
PCK2	-0.396146	0.516964	-2.13573
RARB	-0.92697	-0.0495804	-2.13581
ABCA3	-0.165343	-0.654807	-2.14093
MYH14	0.218955	-0.136476	-2.14639
SMOC1	0.111889	-0.578072	-2.1468
ADM2	0.0220071	0.348982	-2.15145
PLXDC2	0.0512536	0.556388	-2.15243
LZTS3	-0.590906	-0.527253	-2.15325
SCARNA22	1.01527	0.547065	-2.15852
SLC26A11	-0.187907	-0.18652	-2.16047
ACBD4	-0.461153	-0.133105	-2.16314
PLEKHG4	-0.409793	-0.873532	-2.17028
LLGL1	-0.295176	-1.65389	-2.17438
RNF157	-0.290881	-0.30724	-2.17483
RPP25	0.264782	0.047811	-2.17545
CAMK2N1	-0.407996	-0.0633604	-2.17733
KIF17	-0.519596	-0.377852	-2.17951
GAA	-0.332195	-0.208656	-2.18414
PHYHD1	-0.0638599	0.0812059	-2.18711
LARGE2	-0.235651	-0.483722	-2.19565
PNMA6A	0.144973	0.0202556	-2.1983
TMEM80	-0.239818	-0.175341	-2.20468
ZNF22	-0.0435073	0.033541	-2.20832
PHF21B	-0.319234	-0.137929	-2.21197
CTF1	-0.492205	-0.041598	-2.21902
KLF7	-0.202135	-0.142227	-2.22386
BRSK2	-0.0832341	-0.204246	-2.22397
SH2D3C	-0.884185	-0.70959	-2.22506
ZNF853	-0.0168104	-0.265185	-2.23011
SEPT5	-0.29846	0.478415	-2.2311
CRMP1	-0.0344967	-0.189194	-2.2349
WIPI1	-0.254897	0.507546	-2.23718
RNF213	0.111198	-0.412154	-2.23873
HIST1H3E	-0.227837	-0.169299	-2.25369
MYEF2	0.149571	0.13912	-2.25795
RAB39B	-0.45966	0.0628075	-2.26635
CSKMT	-0.284733	-0.0396255	-2.27077
DHTKD1	-0.263979	-0.053196	-2.27266
SLC2A10	-0.037758	-0.0288331	-2.27761
HEIH	-0.439676	-0.0804424	-2.27961
OGDHL	-0.195011	-0.130435	-2.28026
PBX2	-0.109632	-1.68693	-2.28401
GPX3	0.327659	0.61157	-2.29309
DUSP15	0.0420649	-0.558699	-2.30522
RIPPLY2	-0.114504	0.278987	-2.30523
HOXB5	0.282914	-0.315592	-2.31675
GAMT	-0.138395	0.0210614	-2.31726
BCL6B	0.0166202	-0.167721	-2.32469
HERPUD1	-0.334527	0.709882	-2.32705
VANGL2	-0.150763	-0.0791815	-2.33039
LRRC75B	-0.364919	-0.173232	-2.3309
FOXF1	-0.245318	-0.0957366	-2.33222
CXCL12	-0.182933	-0.108823	-2.3333
FAM221A	-0.172481	0.312711	-2.33528
ALDH1A2	-0.175033	-0.164086	-2.33877
WSCD1	0.106598	0.400393	-2.34755
ATL3	-0.174838	-0.304367	-2.35119
DMC1	-0.0746974	0.181457	-2.35985
NMNAT2	-0.239014	0.115274	-2.39413
PCDH9	0.0351019	-0.265101	-2.39422
ZNF503-AS2	0.208566	0.173469	-2.39465
BARX1	0.0634361	0.037976	-2.40179
LAMA3	-0.0966721	-0.550004	-2.40271
FBLL1	-0.119424	0.252009	-2.40763
NID1	-0.00520184	-0.326456	-2.41138
SLC38A3	-0.225386	0.0896148	-2.41464
CALY	-0.107912	-0.435685	-2.42079
ALDH6A1	-0.41958	-0.044647	-2.42494
HOOK1	-0.145077	-0.115828	-2.43786
H2AFJ	0.140692	0.171841	-2.47519
KRTAP19-1	0.33643	-0.252833	-2.47526
PLTP	0.307728	-0.0127817	-2.47642
HSPA7	-2.6937	-2.429	-2.48188
FKBP10	-0.406617	-1.35543	-2.48531
ESPNL	0.233979	0.172578	-2.49769
ARNT2	0.114274	-0.345814	-2.50069
PLAGL1	-0.243631	-0.302061	-2.51052
HID1	-0.233035	0.525287	-2.5261
RPS6KA6	-0.0578035	-0.0774319	-2.53245
SLC6A9	-0.359106	0.144718	-2.53494
CAV3	-0.343565	-0.066026	-2.53657
RND2	0.133262	0.423091	-2.54059
MAGEA2	0.290798	0.0237782	-2.544
CSAG3	0.136923	0.158072	-2.54511
HOXA5	-0.400418	-0.82025	-2.54991
SPDYC	-0.361277	0.635539	-2.55781
FAM83H	-0.0345403	-0.288169	-2.56306
GNE	-0.203235	-0.0777586	-2.65883
CELSR3	-0.21814	-0.596427	-2.66397
HOXB8	0.128858	-1.30123	-2.68695
CSPG5	0.0194795	-0.906133	-2.70868
INA	0.0124608	-0.17165	-2.71573
CERS1	0.0382244	-0.335876	-2.72248
MOCOS	0.17268	-0.0109402	-2.72759
CSAG2	0.0389883	0.184083	-2.74276
KIAA0408	0.12585	-0.753164	-2.747
DHRS3	0.0952482	-0.342019	-2.78444
NMRAL1	-0.0284143	0.0426958	-2.79385
MID1	-0.073622	-0.455585	-2.79778
NRXN3	-0.199275	0.00829789	-2.79801
BEX2	-0.178357	0.161312	-2.80073
SARM1	-0.189039	-0.590218	-2.82446
SH2D2A	-0.0990347	0.28208	-2.83253
TSPEAR-AS2	-0.202341	0.37313	-2.83982
GPC3	-0.0830739	-0.25878	-2.84901
GABRB3	-0.0826687	-0.168179	-2.87384
FAM213A	-0.0509582	0.086102	-2.89528
OXCT1	0.00109952	0.171509	-2.93318
PDIA4	-0.679439	0.417815	-2.9836
CDK18	-0.582707	0.21588	-3.00992
SIAE	0.0306596	-0.290843	-3.10742
MAP7D2	-0.0196992	-0.078868	-3.12405
DECR1	0.063761	0.0584711	-3.13057
DERL3	-1.13699	0.0413093	-3.15947
EPHX2	-0.221331	-0.0658617	-3.17449
TMEM47	-0.427974	0.171891	-3.18346
FAM50B	0.145347	0.0887193	-3.18609
ATP6V0E2-AS1	-0.382294	-0.123746	-3.18684
SPINT2	-0.0221725	0.0808801	-3.26691
ARHGEF25	-0.00627087	-3.01136	-3.28441
GYPC	-0.383414	-0.174552	-3.29925
TMEM59L	-0.181582	-0.175837	-3.3056
MGST1	0.205911	0.0650994	-3.31354
SMARCA1	0.0126133	-0.147836	-3.36278
PRTFDC1	-0.155298	-0.0372549	-3.40486
CALCB	0.691285	0.532857	-3.4322
PLIN2	0.323363	0.0668165	-3.46344
ZIC3	-0.374427	-0.00266636	-3.48012
SLC22A31	-1.71061	-0.575702	-3.50767
CCDC71	0.0963411	-1.55672	-3.5226
KIF1A	0.0273049	-0.121545	-3.5416
PPP1R14A	0.0135968	0.325375	-3.59683
HOXB9	-0.107975	-1.45627	-3.60803
SLC7A3	-0.508863	-0.102377	-3.61359
ALKAL1	-0.0394564	-0.339087	-3.752
DDR2	-0.052549	-0.178409	-3.76725
ALDH1L2	-0.449237	-0.0122087	-3.99996
TSC22D3	0.00809296	-0.334652	-4.42548
AMOT	0.322982	-0.335881	-4.43771
HSPA6	-3.87706	-4.95166	-5.59891
