# Supplementary material for: The role of reciprocal fusions in MLL-r acute leukemia: studying the chromosomal translocation t(6;11)
Source: Oncogene. 2021 Aug 5;40(40):5902–12. doi: 10.1038/s41388-021-01983-3 (PMC8497272; doi:10.1038/s41388-021-01983-3)
Supplement: Supplementary file 15 — MACE Heatmap dataset 2 [file 41388_2021_1983_MOESM15_ESM.xlsx]

## Sheet: Sheet1
gene symbol	exMLL-AF6 log2	AF6-shMLL log2	CO2 log2
HIST1H4C	6.82642	0.401222	6.92031
SRGN	6.2236	0.0655495	6.68742
KMT2A	2.5186	3.08559	5.83493
LYZ	5.31435	0.184156	5.76286
MPO	5.44686	0	5.62221
CD74	4.75842	-0.0402362	5.26358
LCP1	4.46564	0.379953	4.97969
AZU1	4.50471	0.342032	4.86062
CTSG	4.40837	0	4.84901
S100A9	4.34373	0	4.81189
LAPTM5	4.42433	0.289758	4.78113
PRTN3	4.17774	0.344732	4.59451
ARHGDIB	3.87225	0	4.52973
MIF	4.37959	2.61901	4.23515
RNASE2	3.5385	0	4.22731
ELANE	3.75787	0	4.20181
ITGB2	3.78672	0.404665	4.07745
HLA-DRA	3.50376	0.0612434	3.91682
CCL5	3.68301	0.479188	3.87248
CES1	3.5692	0	3.86368
DEFA4	3.35821	0	3.84849
PLAC8	3.22716	0.605858	3.84091
RAC2	3.38328	0.240016	3.83471
HOXA6	3.2948	0.0298241	3.82998
PECAM1	3.32182	0.161909	3.70803
MYO1G	3.25069	0.160451	3.68749
HSPE1-MOB4	3.51175	1.26249	3.68398
LSP1	3.21547	0.165842	3.66167
DHRS9	2.65407	0.165434	3.5582
ITGAL	3.38206	0.252868	3.53688
NME2	3.41369	0.998952	3.51701
NCKAP1L	2.83757	0.384023	3.48448
DEFB1	3.07692	0.383045	3.43193
TYROBP	2.64982	0	3.38934
MALAT1	3.01362	-0.144225	3.34403
ALOX5AP	2.81241	0.230905	3.31928
S100A8	2.88824	0	3.26544
CD44	2.68394	-0.166619	3.25477
PPP1R27	2.60967	-0.0209297	3.25308
PLEK	2.70083	0.139096	3.24594
HCLS1	3.00807	0.523379	3.13553
CSF3R	3.14139	0	3.12102
BEX1	2.57801	1.63953	3.09409
CACNA2D4	2.68624	0.379272	3.06398
HHLA2	2.68039	0	3.0496
NCF1	2.43851	0	3.04941
MYB	2.49838	0.544588	3.04252
GTSF1	2.10667	0	3.04199
CORO1A	2.58079	0.226286	3.02736
TGM5	2.4697	0	3.02565
SLC43A3	2.68234	0.146955	2.99198
NCF4	2.6049	0.29733	2.98776
SCARNA13	2.95323	-0.264266	2.95461
SPI1	2.52961	-0.125281	2.95041
CHI3L1	2.8477	0	2.94742
CD177	2.45742	0.290665	2.94668
ARF5	2.89974	1.48626	2.90058
TOMM5	2.99003	1.27182	2.87581
DOCK2	2.76094	-0.195732	2.86818
PARVG	2.83821	0	2.85976
HIST1H1E	2.07511	-0.0255173	2.85489
SPN	2.18471	0.205827	2.83593
ARMH1	2.45091	0.188146	2.83586
PTPN6	2.4662	0.139452	2.82883
CLSPN	2.57451	-0.110187	2.79523
CD4	2.30349	0.391073	2.79115
PTPN7	2.82074	0.068144	2.78068
S100A6	2.08168	-0.0434109	2.77956
PABPC3	2.53518	0.380965	2.77236
BIN2	2.42484	0	2.69482
AIF1	1.95114	0.275656	2.68584
SELPLG	2.31704	-0.0344643	2.66578
LAT2	2.41109	-0.00788746	2.65458
ARHGAP4	2.62217	0.914641	2.64455
ADA2	2.03317	0.204381	2.61527
CD37	2.42011	0.189485	2.6111
LAIR1	2.25516	0.277639	2.59494
TERC	2.1758	0.253504	2.59437
INPP5D	1.82532	-0.352846	2.59407
ATP8B4	2.33982	0.286102	2.59072
EVI2B	2.52963	0.271979	2.57801
PPIAL4C	2.58641	1.58241	2.55632
HAL	2.25756	0.225602	2.55503
CLEC2B	1.92403	0	2.5208
TPSAB1	2.1267	0	2.50821
NXF3	2.156	0.0142589	2.50559
ITGAX	2.26887	0.278596	2.49581
LY86	1.61055	0	2.46847
PYCARD	2.00368	0	2.44307
PPP6R1	2.40503	0.946697	2.44286
ITGAM	1.93843	0.013994	2.43957
IKZF1	2.06384	0.180864	2.4277
ANPEP	2.10507	0.109786	2.42077
LCP2	2.0484	0	2.41009
EVI2A	2.05346	0	2.39701
GSDMD	2.5406	0.286578	2.39166
PLD4	2.50547	0.384172	2.38812
PSMB8	2.44425	-0.0679929	2.38757
RMRP	2.02093	0.0367507	2.37868
P2RY8	1.96847	0	2.36992
BPI	2.01252	0	2.35361
SPP1	1.62433	-0.000787746	2.34725
AFDN	1.96145	-0.234568	2.31174
PLPPR3	1.92967	1.82005	2.28551
TRPM2	1.89147	0.0761072	2.28276
HIST1H4I	2.29639	1.1283	2.28157
PTPRC	2.22796	0.0853423	2.2745
CCNA1	2.45688	-0.0618848	2.27399
XAGE1B	1.79976	0.261106	2.25082
FAM111A	1.80137	0	2.23053
ETV5	1.74047	0.0747066	2.2162
MS4A7	1.88603	0	2.20678
LTBR	2.25565	0.0203129	2.20153
ZFP91-CNTF	1.50902	0.629242	2.19565
RCSD1	1.91086	0	2.19257
XAGE1A	1.91761	0	2.18526
COL23A1	1.51382	-0.0662354	2.18054
CD300A	1.37053	0	2.18052
CD52	2.08922	0.138569	2.16244
EDARADD	2.05277	0.844373	2.12268
DDX60L	1.75499	0.251088	2.11925
LYL1	2.01846	0.361093	2.10809
TLR2	2.23137	0	2.10143
IRAK3	2.20095	-0.0682314	2.09119
FAM239C	1.66325	0.833398	2.08808
DYSF	1.33673	-0.327869	2.06982
FCER2	1.06185	0.228667	2.06111
RNU4ATAC	1.42927	0.134294	2.05323
ATP2A3	1.89865	0.565132	2.04676
EIF4A1	1.23819	0.396856	2.02615
CORO7-PAM16	1.58121	0.241338	2.02326
FERMT3	1.79102	0.210724	2.01851
TNFRSF1B	1.41196	0.0707923	2.01641
MLH1	1.39392	-0.0167084	2.01555
RNU6-8	2.22656	-0.63677	1.99257
ARHGAP30	1.50022	-0.143737	1.9898
SPNS3	1.43534	0	1.97405
F13A1	2.01616	0	1.96115
IRS4	2.11716	-0.0249895	1.95942
TUBA4A	1.85518	0.158051	1.94848
MFNG	1.41102	0.298132	1.94662
SLFN11	2.09798	0	1.9439
B3GNT7	1.4883	0.0658778	1.93549
CRYBG1	1.20173	0.303596	1.93243
ICAM3	1.30907	0.279355	1.9255
BUB1B-PAK6	2.17898	0.619324	1.91797
PNPLA3	1.66219	-0.207899	1.9167
APOBR	1.61525	0.105675	1.9097
PPIAL4G	2.04415	0.955148	1.89142
PTPRN2	1.46257	-0.0876635	1.87725
ARHGAP45	1.81313	0.143954	1.8662
EGR1	1.38696	-0.0664695	1.86248
COMMD3-BMI1	1.44358	-0.0121054	1.85887
GMFG	1.64055	-0.0143586	1.85819
CRISPLD2	1.70907	0.0867774	1.83522
RNU4-2	2.12521	0.0682247	1.81185
MYO1F	1.60968	-0.313444	1.81117
PPP1R42	1.52866	0.388498	1.78252
HK3	1.94043	0	1.77408
TMC8	2.22775	0.0442909	1.77385
GBP2	1.48443	0.0712054	1.76687
S100A4	1.59107	-0.341988	1.76674
NRROS	2.01988	0.231893	1.74377
LMO2	1.8556	0.227807	1.73325
FAM239B	1.51588	-0.091586	1.72587
UBA7	1.69817	-0.0541147	1.72538
RN7SK	0.947155	-0.327111	1.72531
APBB1IP	1.76443	-0.020197	1.72376
ARHGAP9	1.74238	0.26458	1.72251
CD33	0.981623	-0.0786873	1.71922
ITGA4	1.28757	-0.149013	1.6825
SLC16A4	1.10374	0.500346	1.66795
FBP1	1.29651	0.123305	1.65224
SLC16A3	1.6339	-0.0650327	1.65205
SCARNA20	0.85066	-0.198657	1.64958
EDC4	2.30296	0.280216	1.63627
IGFBP7	1.04429	-0.120644	1.63053
DHRS2	2.11347	-1.04189	1.61921
ZC3H11B	1.04488	-0.499999	1.61568
PIK3AP1	1.29015	0.278285	1.61438
POTEI	1.26693	-0.230724	1.6131
CPM	1.20188	0.180792	1.59503
FBXL19-AS1	0.90118	0.655093	1.57639
PARP10	1.30265	0.0725816	1.57415
IL16	1.93846	0.00315223	1.57362
RAVER1	1.33809	0.0419519	1.56284
SAMD9	1.26051	0.246285	1.5486
BST2	1.27614	-0.42631	1.54479
FGD3	1.30561	0.0538418	1.54339
PTPRE	1.29216	-0.0623366	1.53988
FRG2C	2.85334	0.0361626	1.52409
LGALS9	1.15473	-0.18127	1.5161
MLC1	1.10899	0.0884673	1.51126
NGFR	1.79286	-0.279576	1.50981
PRSS35	0.949311	-0.00201112	1.50494
WAS	1.3327	0.0254578	1.49727
PTAFR	0.927699	-0.214279	1.48717
NEDD9	1.13733	-0.369569	1.4773
CSRP1	1.27455	0.177565	1.47643
CHST13	1.22267	0.166832	1.43491
POTEE	1.34381	-0.181778	1.4283
REL	1.48948	0.374286	1.42499
MYO18A	1.11425	-0.28072	1.42227
ENG	0.790627	0.0348656	1.41785
UNC13D	1.55258	0.168826	1.41689
THBS4	1.63182	0.968831	1.41182
RIPOR2	0.839712	0.18352	1.40292
CSTA	1.17767	-0.27285	1.3856
PILRB	0.929913	0.387537	1.37459
CASC9	1.025	0.0556373	1.37353
MAN2B1	1.77466	0.346006	1.36081
ZNF506	1.28623	0.813244	1.35747
WDR63	0.684423	0.187642	1.35211
CFHR1	1.23253	0.334208	1.34725
RNU4-1	1.699	-0.0902306	1.32862
FRG2	2.04543	-0.400971	1.32598
EIF2S3B	1.37194	0.716783	1.31973
RFPL4A	2.15391	0.0178726	1.29972
HCST	1.0282	0.337861	1.28666
PCDH19	1.12266	0.324862	1.25969
SLCO3A1	0.846617	0.108603	1.25463
FOSB	1.4806	0.274535	1.16513
NEURL1B	1.50348	0.185406	1.15226
TMEM217	0.00602886	0.0242708	1.14418
H2BFS	1.49327	0.909046	1.07668
SNX32	1.2385	-0.233471	1.04624
UBE2L5	1.6114	0.752307	0.998193
FRG2B	2.79717	-0.309505	0.962484
SPDYA	1.4967	0.545368	0.925054
SNAI1	1.75013	0.132209	0.923536
MBD3L2B	2.13984	-0.226505	0.856914
FCGR2A	0.504126	3.90538	0.821344
GJB2	1.28576	-0.0172171	0.821329
SERPINE1	1.7499	-0.749968	0.601458
RFPL2	1.86807	-0.435848	0.581235
RRAD	1.30624	-1.44937	0.47622
HSPA1A	0.207141	-1.89722	0.350235
ALPG	1.5792	-1.10683	0.245839
TPRX1	1.59494	-0.7023	0.184608
SCARNA1	0.415472	-0.0221412	0.0554297
ALG13-AS1	0.0602089	1.10591	-0.0553884
DIO3	1.2751	-0.446404	-0.0986344
KCNE2	-1.30608	-0.484934	-0.636111
ATP6V1G2	-1.38284	0.215905	-0.670242
SGPP2	-1.13579	-0.219932	-0.814967
RNVU1-7	-1.20962	0.0779433	-0.831324
HSPA7	-1.81549	-2.03919	-0.963158
ISOC2	-1.9828	0.214647	-1.07057
RNU1-3	-1.42382	-0.00794771	-1.16924
SH2D3C	-1.49898	-0.577967	-1.18771
RAPGEF3	-1.2195	0.0972351	-1.21221
RBAK-RBAKDN	-2.14027	0.195289	-1.25921
PPP1R2B	-0.775715	-0.193823	-1.3243
DUSP8	-1.88427	-0.220654	-1.38904
FUT1	-1.57268	0.24136	-1.52528
TCEAL7	-1.11378	-1.21573	-1.57174
HSD17B8	-2.10776	0.233251	-1.59373
HOXB8	-2.48683	-0.258887	-1.61618
NUPR1	-2.38877	0.288232	-1.62247
MTRNR2L1	-1.7172	-1.33059	-1.64024
NOP2	-1.16417	-1.2051	-1.65374
PBX2	-1.96092	0.154301	-1.66183
HAUS7	-1.37319	-0.55709	-1.72835
HOXB9	-2.07147	-0.0631722	-1.78403
FKBP10	-2.45469	0.0882565	-1.79933
INO80B	-2.09851	-0.328608	-1.85528
LRP5	-2.02793	-0.202339	-1.86837
CDH15	-2.2716	0.640117	-1.95566
AKNA	-2.05482	0.176466	-2.01955
EML2-AS1	-2.11268	0.626325	-2.04301
EML2-AS1	-2.11268	0.626325	-2.04301
PDIA4	-2.12252	0.461161	-2.07372
MTFP1	-1.77083	-0.803911	-2.16711
SDF2L1	-2.01081	0.446885	-2.17797
HERPUD1	-2.24824	0.560998	-2.18498
ZNF90	-1.64811	-1.14687	-2.23928
RPS29	-2.25363	-0.0871821	-2.2709
SNHG7	-2.24695	-0.00450133	-2.35467
LLGL1	-2.91727	-0.0597713	-2.3599
ARHGEF25	-2.42838	-0.04671	-2.36536
DDIT3	-2.46455	0.9679	-2.50616
SLC22A31	-2.36417	0.183951	-2.95438
DERL3	-3.32416	0.402396	-3.41919
HSPA6	-4.83569	-5.47154	-3.51872
CCDC71	-3.90757	-0.139153	-3.65586
